# Supplementary material
Source: PubMed Central journal article supplement (PMC7523681)
Supplement: btz638_supplementary_data.pdf [file btz638_supplementary_data.pdf]

## **SUPPLEMENTARY MATERIAL:**

### **AntiHIV-Pred: Web-resource for in silico prediction of anti-HIV/AIDS activity**

|                                                                                  |           |
|----------------------------------------------------------------------------------|-----------|
| <b>1. Data Selection and Curation .....</b>                                      | <b>2</b>  |
| <b>2. Selected Descriptors .....</b>                                             | <b>3</b>  |
| <b>3. QSAR Modeling Using GUSAR Program .....</b>                                | <b>7</b>  |
| <b>4. PASS (Prediction of Activity Spectra of Substances) Method.....</b>        | <b>10</b> |
| <b>5. Qualitative Characteristics of the (Q)SAR Models .....</b>                 | <b>13</b> |
| <b>6. List of Predicted Activities .....</b>                                     | <b>16</b> |
| <b>7. Examples of Predictions for the Widely Used Antiretroviral Drugs .....</b> | <b>20</b> |
| <b>8. Training Sets.....</b>                                                     | <b>22</b> |
| 8.1 Protease training set .....                                                  | 22        |
| 8.2 Reverse transcriptase training set .....                                     | 74        |
| 8.3 Integrase training set .....                                                 | 105       |
| 8.4 Rev training set .....                                                       | 140       |
| 8.5 TAT training set .....                                                       | 142       |

## 1. Data Selection and Curation

Experimental data for building models of quantitative structure-activity relationships were downloaded from ChEMBL database (version 24) and then analyzed. Data containing about 50 thousand entries were derived from scientific literature turned out to be highly heterogeneous having different experimental conditions and various ligand efficiency indices were measured (Ki, IC50, percent of inhibition etc.). The curation process was realized according to the pipeline (Figure 1). It corresponds to the “Best QSAR practice” (Tropsha,A., et al. *Molecular Informatics*, 2010, 29, 476; Fourches,D., et al. *Journal of Chemical Information and Modeling*, 2016, 56, 1243).

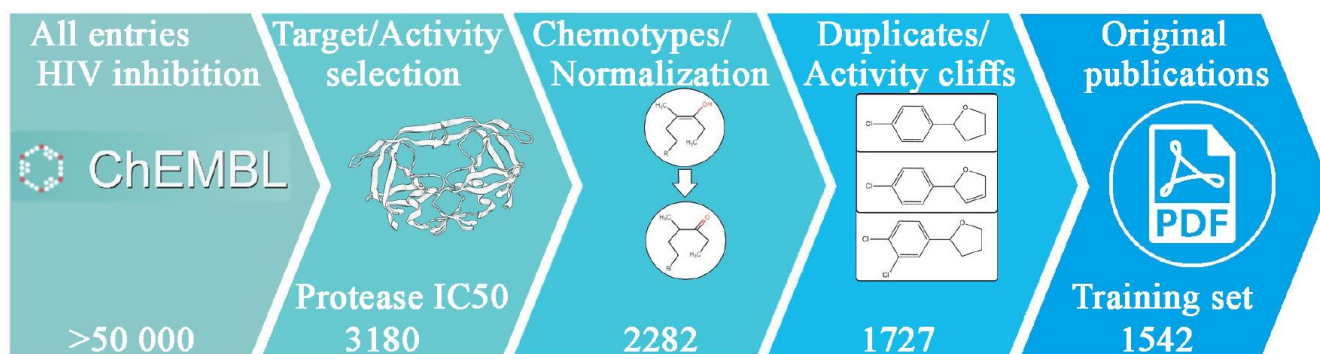

**Figure 1.** Data curation process pipeline.

The process could be subdivided to two parts – chemical data curation and biological data curation.

Chemical data curation:

- Deletion of incomplete and insufficient entries;
- Deletion of inorganics, metallorganics, rare atom compounds;
- Mixture and salt compounds processing and standartzition;
- Invalid structures recovery;
- Standartzition of structures kekulization;
- Chemical groups normalization;
- Tautomeric data handling;
- Enantiomeric and stereomeric data inspection.

Biological data curation:

- Deletion of entries for mutants, drug-resistant stamps and invalid targets;
- Data split basing on experimental protocols;
- Potential duplicates were checked either for equal compounds with different activity values or for coumpounds having the same set of descriptors. Basing on each case the entries were deleted or the median value was calculated;
- External laboratory error estimation;
- Handling activity cliff data

In addition, the data validity was verified by analysis of the information presented in the original publications. Curated data were used to create training sets for HIV targets.

## 2. Selected Descriptors

The modelling was accomplished using two types of descriptors – Multilevel Neighborhoods Atoms (MNA) and Quantitative Neighborhoods of Atoms (QNA) descriptors.

MNA descriptors are based on the molecular structure representation, which includes the hydrogen atoms according to the valences and partial charges of other atoms and does not specify the types of bonds. MNA descriptors are generated as recursively defined sequence:

- zero-level MNA descriptor for each atom is the mark  $A$  of the atom itself;

any next-level MNA descriptor for the atom is the sub-structure notation  $A(D_1, D_2, \dots, D_i, \dots)$ , where  $D_i$  is the previous-level MNA descriptor for  $i$ -th immediate neighbor's of the atom  $A$ .

The mark of atom may include not only the atomic type but also any additional information about the atom. In particular, if the atom is not included into the ring, it is marked by «-». The neighbor descriptors  $D_1, D_2, \dots, D_i, \dots$  are arranged in unique manner, e.g., in lexicographic order. Iterative process of MNA descriptors generation can be continued covering first, second, etc. neighborhoods of each atom.

Descriptors for each molecule are generated on the basis of connectivity matrix  $\mathbf{C}$  and table of atoms types  $A$ . Connectivity matrix contains data on the covalent bonds in a molecule. Various bond types are not specified (topological approximation). All hydrogens based on valences and partial charges of atoms are taken into account. The types of atoms are specified according to the data presented in Table 1.

**Table 1.** Classification of different atom types used in calculation of descriptors

| Class name | Elements |
|------------|----------|
| H          | H        |
| C          | C        |
| N          | N        |
| O          | O        |
| F          | F        |
| Si         | Si       |
| P          | P        |
| S          | S        |
| Cl         | Cl       |
| Ca         | Ca       |
| As         | As       |
| Se         | Se       |
| Br         | Br       |
| Li*        | Li, Na   |
| B*         | B, Re    |
| Mg*        | Mg, Mn   |
| Sn*        | Sn, Pb   |

|     |                                                                                              |
|-----|----------------------------------------------------------------------------------------------|
| Te* | Te, Po                                                                                       |
| I*  | I, At                                                                                        |
| Os* | Os, Ir                                                                                       |
| Sc* | Sc, Ti, Zr                                                                                   |
| Fe* | Fe, Hf, Ta                                                                                   |
| Co* | Co, Sb, W                                                                                    |
| Sr* | Sr, Ba, Ra                                                                                   |
| Pd* | Pd, Pt, Au                                                                                   |
| Be* | Be, Zn, Cd, Hg                                                                               |
| K*  | K, Rb, Cs, Fr                                                                                |
| V*  | V, Cr, Nb, Mo, Tc                                                                            |
| Ni* | Ni, Cu, Ge, Ru, Rh, Ag, Bi                                                                   |
| In* | In, La, Ce, Pr, Nd, Pm, Sm, Eu                                                               |
| Al* | Al, Ga, Y, Gd, Tb, Dy, Ho, Er, Tm, Yb, Lu, Tl                                                |
| R*  | R, He, Ne, Ar, Kr, Xe, Rn, Ac, Th, Pa, U, Np, Pu, Am, Cm, Bk, Cf, Es, Fm, Md, No, Lr, Db, JI |

Example of structure presentation by zero-, first- and second-levels MNA descriptors for the phenol's molecule is shown in Figure 2.

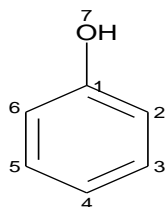

| Atom | MNA/0 | MNA/1   | MNA/2                    |
|------|-------|---------|--------------------------|
| 1    | C     | C(CC-O) | C(C(CC-H)C(CC-H)-O(C-H)) |
| 2    | C     | C(CC-H) | C(C(CC-H)C(CC-O)-H(C))   |
| 3    | C     | C(CC-H) | C(C(CC-H)C(CC-H)-H(C))   |
| 4    | C     | C(CC-H) | C(C(CC-H)C(CC-H)-H(C))   |
| 5    | C     | C(CC-H) | C(C(CC-H)C(CC-H)-H(C))   |
| 6    | C     | C(CC-H) | C(C(CC-H)C(CC-O)-H(C))   |
| 7    | -O    | -O(C-H) | -O(C(CC-O)-H(-O))        |
| 8    | -H    | -H(C)   | -H(C(CC-H))              |
| 9    | -H    | -H(C)   | -H(C(CC-H))              |
| 10   | -H    | -H(C)   | -H(C(CC-H))              |
| 11   | -H    | -H(C)   | -H(C(CC-H))              |
| 12   | -H    | -H(C)   | -H(C(CC-H))              |
| 13   | -H    | -H(-O)  | -H(-O(C-H))              |

MNA descriptors for phenol.  
MNA/0, MNA/1, MNA/2 - zero, first and second levels  
of MNA descriptors.

**Figure 2.** MNA descriptors of 0, 1, 2 level calculated for an example structure.

QNA descriptors are calculated based on the connectivity matrix  $\mathbf{C}$  and the standard values of ionization potential  $IP$  and electron affinity  $EA$  of atoms in a molecule. For any given atom  $i$  QNA descriptors are calculated as follow:

$$P_i = B_i \sum_k \left( \text{Exp} \left( -\frac{1}{2} \mathbf{C} \right) \right)_{ik} B_k \quad (1)$$

$$Q_i = B_i \sum_k \left( \text{Exp} \left( -\frac{1}{2} \mathbf{C} \right) \right)_{ik} B_k A_k \quad (2)$$

where

$$A_k = \frac{1}{2} (IP_k + EA_k) \quad B_k = \frac{1}{2} (IP_k - EA_k)^{-\frac{1}{2}}$$

The values of  $EA$  and  $IP$  collected from many different sources and used in this work are represented in Table 2.

**Table 2.** Electron affinity ( $EA$ ) and first ionization potential ( $IP$ ), electron volts, and atomic radius ( $AR$ ), angstroms.

| Atom | EA    | IP    | AR   | Atom | EA    | IP    | AR   | Atom | EA    | IP    | AR   |
|------|-------|-------|------|------|-------|-------|------|------|-------|-------|------|
| H    | 0.75  | 13.60 | 0.46 | Kr   | -0.42 | 14.00 | 1.98 | Lu   | 0.20  | 6.15  | 1.75 |
| He   | 0.08  | 24.59 | 1.22 | Rb   | 0.49  | 4.18  | 2.48 | Hf   | 0.33  | 7.50  | 1.59 |
| Li   | 0.62  | 5.39  | 1.55 | Sr   | -0.15 | 5.69  | 2.15 | Ta   | 0.40  | 7.89  | 1.46 |
| Be   | -0.20 | 9.32  | 1.13 | Y    | 0.31  | 6.22  | 1.81 | W    | 0.67  | 7.98  | 1.40 |
| B    | 0.28  | 8.30  | 0.91 | Zr   | 0.33  | 6.84  | 1.60 | Re   | 0.23  | 7.88  | 1.37 |
| C    | 1.26  | 11.26 | 0.77 | Nb   | 0.51  | 6.88  | 1.45 | Os   | 1.44  | 8.73  | 1.35 |
| N    | 0.44  | 14.53 | 0.71 | Mo   | 0.68  | 7.09  | 1.39 | Ir   | 1.57  | 9.10  | 1.35 |
| O    | 1.46  | 13.62 | 0.73 | Tc   | 0.54  | 7.23  | 1.36 | Pt   | 1.10  | 8.96  | 1.38 |
| F    | 3.45  | 17.42 | 0.71 | Ru   | 1.10  | 7.37  | 1.34 | Au   | 1.25  | 9.23  | 1.44 |
| Ne   | 0.00  | 21.57 | 1.60 | Rh   | 1.14  | 7.46  | 1.34 | Hg   | -0.19 | 10.44 | 1.57 |
| Na   | 0.55  | 5.14  | 1.87 | Pd   | 1.11  | 8.34  | 1.37 | Tl   | 0.31  | 6.11  | 1.71 |
| Mg   | -0.31 | 7.64  | 1.60 | Ag   | 1.22  | 7.58  | 1.44 | Pb   | 1.39  | 7.42  | 1.75 |
| Al   | 0.30  | 5.99  | 1.43 | Cd   | -0.43 | 8.99  | 1.56 | Bi   | 0.97  | 7.29  | 1.82 |
| Si   | 1.39  | 8.15  | 1.34 | In   | 0.31  | 5.79  | 1.66 | Po   | 1.97  | 8.42  | 1.56 |
| P    | 0.75  | 10.49 | 1.30 | Sn   | 1.39  | 7.34  | 1.58 | At   | 2.90  | 9.20  | 1.48 |
| S    | 2.00  | 10.36 | 1.04 | Sb   | 0.90  | 8.64  | 1.61 | Rn   | -0.15 | 10.75 | 2.27 |
| Cl   | 3.61  | 12.97 | 0.99 | Te   | 1.97  | 9.01  | 1.70 | Fr   | 0.48  | 3.98  | 2.80 |
| Ar   | -0.37 | 15.76 | 1.92 | I    | 3.23  | 10.45 | 1.53 | Ra   | -0.15 | 5.28  | 2.35 |
| K    | 0.50  | 4.34  | 2.36 | Xe   | -0.25 | 12.13 | 2.18 | Ac   | 0.80  | 5.20  | 2.03 |
| Ca   | -0.19 | 6.11  | 1.97 | Cs   | 0.47  | 3.89  | 2.66 | Th   | 0.80  | 6.10  | 1.80 |
| Sc   | 0.19  | 6.56  | 1.64 | Ba   | -0.15 | 5.21  | 2.23 | Pa   | 0.84  | 6.00  | 1.62 |
| Ti   | 0.33  | 6.82  | 1.46 | La   | 0.30  | 5.59  | 1.87 | U    | 0.82  | 6.19  | 1.53 |
| V    | 0.53  | 6.74  | 1.34 | Ce   | 0.25  | 5.54  | 1.83 | Np   | 0.82  | 6.20  | 1.50 |
| Cr   | 0.67  | 6.77  | 1.27 | Pr   | 0.20  | 5.47  | 1.83 | Pu   | 0.84  | 6.06  | 1.62 |
| Mn   | -0.17 | 7.43  | 1.30 | Nd   | 0.20  | 5.53  | 1.82 | Am   | 0.85  | 6.00  | 1.70 |
| Fe   | 0.50  | 7.90  | 1.26 | Pm   | 0.20  | 5.58  | 1.81 | Cm   | 0.85  | 6.09  | 1.55 |
| Co   | 0.66  | 7.86  | 1.25 | Sm   | 0.20  | 5.64  | 1.80 | Bk   | 0.82  | 6.23  | 1.49 |
| Ni   | 1.16  | 7.64  | 1.24 | Eu   | 0.20  | 5.67  | 2.04 | Cf   | 0.84  | 6.27  | 1.42 |
| Cu   | 1.23  | 7.72  | 1.28 | Gd   | 0.20  | 6.15  | 1.80 | Es   | 0.86  | 6.47  | 1.43 |
| Zn   | -0.44 | 9.39  | 1.39 | Tb   | 0.20  | 5.86  | 1.78 | Fm   | 0.86  | 6.60  | 1.38 |
| Ga   | 0.30  | 6.00  | 1.39 | Dy   | 0.20  | 5.94  | 1.77 | Md   | 0.83  | 6.68  | 1.38 |

|           |      |       |      |           |      |      |      |           |      |      |      |
|-----------|------|-------|------|-----------|------|------|------|-----------|------|------|------|
| <b>Ge</b> | 1.39 | 7.90  | 1.39 | <b>Ho</b> | 0.20 | 6.02 | 1.78 | <b>No</b> | 0.79 | 6.58 | 1.47 |
| <b>As</b> | 0.80 | 9.79  | 1.48 | <b>Er</b> | 0.20 | 6.11 | 1.76 | <b>Lr</b> | 0.85 | 6.69 | 1.30 |
| <b>Se</b> | 2.02 | 9.75  | 1.17 | <b>Tm</b> | 0.20 | 6.18 | 1.75 | <b>Db</b> | 0.46 | 6.43 | 1.14 |
| <b>Br</b> | 3.45 | 11.81 | 1.14 | <b>Yb</b> | 0.20 | 6.25 | 1.94 | <b>Jl</b> | 0.50 | 6.78 | 1.01 |

Though the value  $\mu(P - Q)$  can be considered by convention as the partial atomic charge, where  $\mu$  is the chemical potential, in general, the  $P$  and  $Q$  values are not the estimate of partial atomic charges, hardness or so forth.

QNA describes each of the atoms in a molecule, and, at the same time, each of the  $P$  and  $Q$  values depends on the whole composition and structure of a molecule (Figure 3).

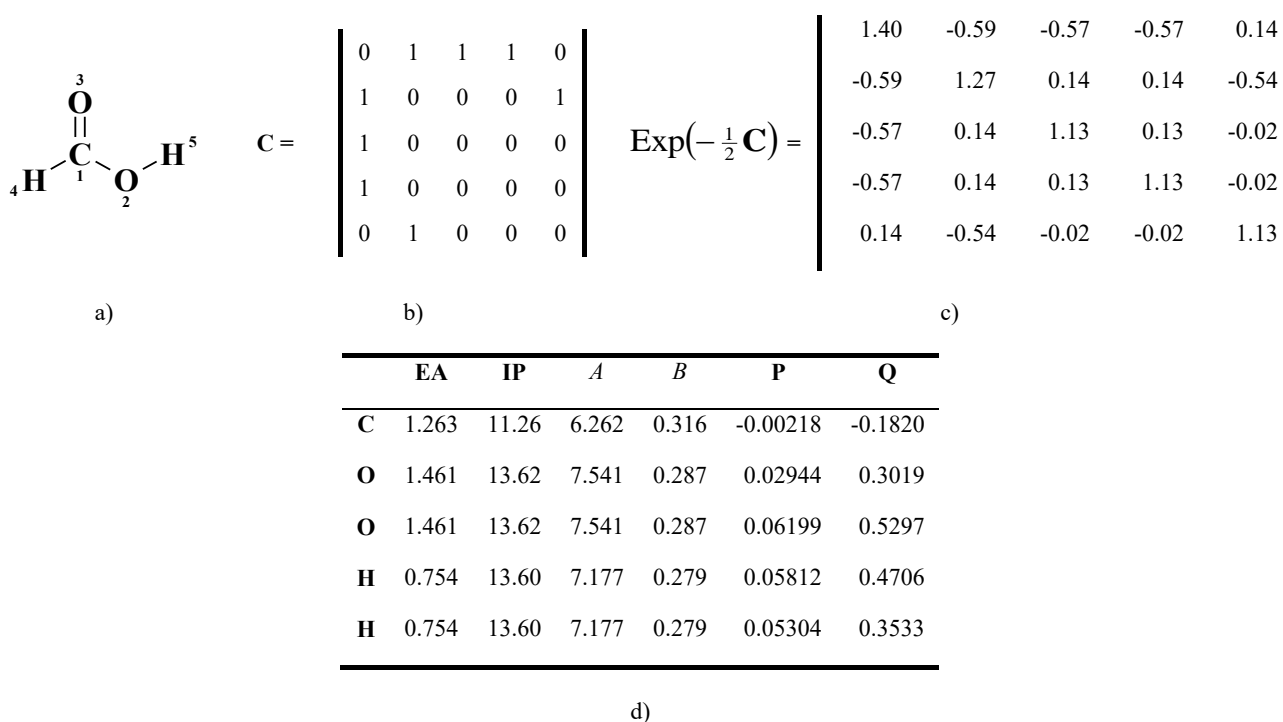

**Figure 3.** Example of QNA description of *formic acid*: (a) structure diagram; (b) connectivity matrix; (c) exponent of the connectivity matrix; (d) electron affinities, ionization potentials, variables of equations (1) and (2),  $P$  and  $Q$  values for each atom of *formic acid* molecule.

From Figure 3c it is clear that any atom influences the others, though the influence decreases with the increase of the distance between them; *e.g.* components of matrix  $\text{Exp}\left(-\frac{1}{2}\mathbf{C}\right)$  for atom 1 (C) are: 1.40 for atom 1 itself, -0.59 for its immediate neighbor atom 2 (O), -0.57 for atoms 3 (O) and 4 (H), and 0.14 for atom 5 (H).

The algorithm of QNA descriptor calculation is quite simple due to uselessness of the matrix  $\text{Exp}\left(-\frac{1}{2}\mathbf{C}\right)$  itself, only product of  $\text{Exp}\left(-\frac{1}{2}\mathbf{C}\right)$  by vector is necessary, and that matrix  $\mathbf{C}$  consists of 0 and 1 only.

### 3. QSAR Modeling Using GUSAR Program

QNA describe each particular atom of a molecule, at the same time, each  $P$  or  $Q$  value depends on the total molecule composition and structure. To use this molecule structure representation we have proposed to calculate each  $f_i(S)$  function of the structure of a molecule as the average value of  $g_i(P, Q)$  function of  $P$  and  $Q$  variables for those  $m$  atoms in a molecule, which have two or more immediate neighbors:

$$f_i(S) = \frac{1}{m} \sum_k g_i(P, Q) \quad (3)$$

$$y_{pred} = a_0 + \sum_i a_i \frac{1}{m} \sum_k g_i(P, Q) \quad (4)$$

According to the equation (4) the estimate  $y_{pred}$  for molecule can be interpreted as an average of values predicted for particular atoms in a molecule. Formally, QNA descriptors represent a molecule structure by two descriptors only ( $P$  and  $Q$ ), in contrast to numerous traditional descriptors used in QSAR. Since  $P$  and  $Q$  values have different scales (standard deviations are 0.023 and 0.208, respectively), we made the normalization to optimize a family of functions  $g_i(P, Q)$ .

Normalization has been performed by calculation of the average values ( $E_P$  and  $E_Q$ ), standard deviations ( $D_P$  and  $D_Q$ ) and correlation between  $P$  and  $Q$  values ( $R_{PQ}$ ):

$$P' = \frac{P - E_P}{D_P} \quad Q' = \frac{Q - E_Q}{D_Q} \quad (5)$$

$$U = \frac{P' + Q'}{\sqrt{2(1 + R_{PQ})}} \quad V = \frac{P' - Q'}{\sqrt{2(1 - R_{PQ})}} \quad (6)$$

The orthonormal  $U$  and  $V$  have zero mean, unit variance and they are uncorrelated.

Chebyshev polynomials were chosen as the family of functions  $g_i(P, Q)$ , and the orthonormal  $U$  and  $V$  values have been additionally transformed by using hyperbolic tangent, so, the “normalized QNA” vary from -1 to 1. After this, the functions  $g_i(P, Q)$  in equation (4) are represented using Chebyshev polynomials as:

$$g_i(P, Q) = T_{uv}(P, Q) = \text{Cos}(u * \text{ArcCos}(\text{TanH}(U))) * \text{Cos}(v * \text{ArcCos}(\text{TanH}(V))) \quad (7)$$

where the integer numbers  $u, v = 0, 1, 2 \dots$  define 2-dimensional Chebyshev polynomial degree. The final equation for estimate  $y_{pred}$  using QNA descriptors is:

$$y_{pred} = \frac{1}{m} \sum_k \left( a_0 + \sum_{uv} a_{uv} T_{uv}(P, Q) \right) \quad (8)$$

QNA descriptors and their polynomial transformations (5)-(7) do not provide information on the shape and volume of a molecule although this information may be important for determination of the structure-activity relationships. Therefore, these parameters were added to QNA descriptors. Topological length of a molecule was calculated as the maximal distance between any two atoms and the volume of a molecule – as the sum of each atom’s volume,

$\frac{4}{3}\pi R^3$ , where  $R$  is the atomic radius (see Table 2 (AR)).

The Chebyshev polynomials are arranged in ascending order of their degrees  $u + v$ . For  $u + v = 1$  they are  $T_{1,0}$ ,  $T_{0,1}$ ; for  $u + v = 2$  they are  $T_{2,0}$ ,  $T_{1,1}$ ,  $T_{0,2}$  etc. The first, second and third power of topological length and volume

of a molecule were used. The number of initial variables equals to the number of Chebyshev polynomials plus the number of the first, second and third power of topological length and volume of a molecule.

The number of initial variables depends on the number of compounds in the training set. If the number of compounds in the training set less than 25, then the initial variables are 24. If the number of compounds in the training set varied from 25 to 100, then the initial variables depends on the following equation:

$$A = (\ln(B) \times 18.755) - 36.37,$$

where  $A$  – initial variables and  $B$  – the number of compounds in the training set. If the number of compounds in the training set varied from 100 to 2000, then the number of initial variables equal to one-half of the number of compounds in the training set. If the number of compounds in the training set exceeds 2000, then the initial variables are 1000.

GUSAR algorithm uses three procedures described below for generation of different QSAR models based on QNA descriptors.

- 1)  $U$  and  $V$  values from (7) are multiplied by value, which are randomly chosen from 0.98 to 1.09.
- 2) Coefficient before matrix  $\mathbf{C}$  is randomly chosen from -0.1 to -0.9.
- 3) Calculation of QNA descriptors is randomly chosen from two cases. First case is when  $P$  and  $Q$  values are calculated for all atom types. Second case is when  $P$  and  $Q$  values are calculated for each atom, which has connection with more than one carbon.

All these procedures are used for creation of each QSAR model based on QNA descriptors. These procedures allow obtaining the different QNA models.

### Self-Consistent Regression (SCR)

The classical MLR has a number of limitations. Particularly, the number of objects in the training set should significantly exceed the number of independent variables, and it is important to use the non-collinear variables only. To overcome these limitations, we have employed the approach based on statistical regularization of ill-posed problems. It has resulted in the regularized least-squares method:

$$\mathbf{a} = \text{ArgMin} \left[ \sum_{i=1}^n \left( y_i - \sum_{k=0}^m (x_{ik} a_k) \right)^2 + \sum_{k=1}^m (v_k a_k^2) \right] \quad (9)$$

where  $\mathbf{a}$  is the regression coefficient,  $n$  is the number of objects,  $y_i$  is the response value of  $i^{\text{th}}$  object,  $m$  is, here and below, the number of the independent variables,  $x_{ik}$  is the value of  $k^{\text{th}}$  independent variable of  $i^{\text{th}}$  object,  $a_k$  is the  $k^{\text{th}}$  value of the regression coefficients,  $v_k$  is the  $k^{\text{th}}$  value of the regularization parameters. Equation (9) has the following solution:

$$\mathbf{a} = \mathbf{TX}^T \mathbf{y}, \quad \mathbf{T} = (\mathbf{X}^T \mathbf{X} + \mathbf{V})^{-1}$$

where  $\mathbf{X}^T$  is the transposed regression matrix  $\mathbf{X}$ ,  $\mathbf{V}$  is a diagonal matrix of the regularization parameters. The best regularization  $\mathbf{V}$  satisfies to the equations:

$$v_k (a_k^2 + s^2 t_k) = s^2, \quad k = 1, \dots, m$$

where  $s$  is the standard deviation of residuals,  $t_k$  is the  $k^{\text{th}}$  diagonal element of matrix  $\mathbf{T}$ .

### Use of Nearest Neighbours

Algorithm of GUSAR allows using nearest neighbours for improvement of prediction value obtained from regression model. The corrected value is estimated by taking an average of the three chemicals values in the training set that are the most similar to the chemical under study. Similarity of the any pair of chemical



compounds is estimated as Pearson's coefficient calculated in the space of independent variables obtained after SCR. This function usually increases the prediction accuracy for the external test sets for QSAR models created on the basis of training sets with 500 and more structures. Sometimes the use of this function may lead to decrease of accuracy prediction, which depends on the quality of the training sets.

### Consensus method

The predicted value is estimated by taking into account a weighted average of the predicted values from the obtained QSAR models (QSAR models provide the predictions that are within the respective applicability domains). Prediction obtained from each developed model is weighted on its applicability domain values (AD). GUSAR algorithm calculates the similarity value; leverage value and estimation of three nearest neighbours' accuracy of prediction for the applicability domain assessment (see AD description, page 70). Weighting of the predicted value is performed using similarity and leverage values only.

If all predicted values from the obtained QSAR models exceed the similarity threshold and leverage threshold, then the consensus prediction value is calculated from similarity weighted predicted values. If all predicted values from the obtained QSAR models are less than the leverage and similarity thresholds, then the consensus prediction value is calculated from leverage weighted predicted values. If the predicted values from the obtained QSAR models exceed similarity and is less than leverage thresholds, then the consensus prediction value is calculated as average from leverage weighted predicted values and similarity weighted predicted values. If the predicted values from the obtained QSAR models are less than similarity and exceed the leverage thresholds, then the consensus prediction value is calculated as average from all weighted predicted values.

### Similarity

Three nearest neighbours from the training set are calculated for each chemical compound under study using similarity estimation. Similarity of the pair of chemical compounds is estimated as Pearson's coefficient calculated in the space of independent variables obtained after SCR. The average similarity of three nearest neighbours is used for assessment of the applicability domain (AD) of the model. If the average similarity exceeds the threshold, then the studied chemical compound falls in AD of the model and vice-versa. The higher value of the threshold was selected, the more similar compounds fell in AD of the model.

### Leverage

Hat value of leverage was used for domain applicability assessment. Hat values from the leverage matrix representing the "distance" of the molecule to the model structural space were calculated as:

$$Leverage = x^T (\mathbf{X}^T \mathbf{X})^{-1} x$$

where  $x$  is a vector of descriptors of a query compound, and  $\mathbf{X}$  is a matrix formed with rows corresponding to the descriptors of molecules from the training set. Hat value of leverage was calculated for each compound of the training set and then a distribution of the obtained values was estimated.

A warning level of hat value was considered as percentile. The end-user could select 99<sup>th</sup>, 95<sup>th</sup> and 90<sup>th</sup> percentile. Therefore, if a chemical compound from the external test set has hat value exceeded this warning level, then this compound is considered as being out of the applicability domain.

Accuracy of three nearest neighbours' predictions

For the assessment of this type of the applicability domain the following equation is used:

$$AD_{value} = \frac{RMSE_{3NN}}{RMSE_{train}}$$

where  $AD_{value}$  is the applicability domain value,  $RMSE_{3NN}$  is root mean square error of prediction of three most similar compounds from the training set,  $RMSE_{train}$  is root mean square error of predictions for the training set.

Three nearest neighbours from the training set are calculated for each studied chemical compound using similarity value. Similarity of the two chemical compounds is estimated as Pearson's coefficient calculated in the space of independent variables obtained by SCR.

If the  $AD_{value}$  is less than the threshold, then the studied chemical compound falls into AD of the model and vice-versa. Therefore, any chemical compound, whose three nearest neighbours are predicted worse than the prediction accuracy of the whole training set, is considered as being out of the applicability domain.

### **Leave-Many-Out procedure**

This procedure is used for assessment of external prediction accuracy. The initial data is randomly divided onto the training and the external test sets. End-user could select the following proportions:

10% for the external test set and 90% for the training set;

20% for the external test set and 80% for the training set;

30% for the external test set and 70% for the training set;

50% for the external test set and 50% for the training set.

For obtaining the objective assessment of predictive accuracy and robustness of the developed models each splitting should be repeated many times. End-user could select the following number of repeats: 1, 5, 10 and 20.

### **Y-randomization procedure**

This procedure allows to be ensuring that the developed models do not have the overfitting. In this procedure the dependent-variable vector, Y vector, is randomly shuffled and new QSAR model is developed using the original independent-variable matrix. It is expected that the resulting models should generally have low  $Q^2$  values. This procedure could be repeated many times for each model, and then the average  $Q^2$  value is calculated.

## **4. PASS (Prediction of Activity Spectra of Substances) Method**

In PASS biological activities are described qualitatively (active or inactive). Any property of chemical compounds, which is determined by their structural peculiarities, can be used for prediction by PASS. It is clear, that the applicability of PASS is broader than the prediction of biological activity spectra.

The MNA descriptors (both for predicting the activity spectrum of the compound and for adding substances to SAR Base) are generated only if molecular structure corresponds to the following criteria:

- each of the atoms in a molecule must be presented by atom symbol from the periodic table. Symbols of unspecified atom A, Q, \*, or R group labels are not allowed;
- each of the bonds in a molecule must be covalent bond presented by single, double or triple bond types only;
- molecular structure must include three or more carbon atoms;
- molecular structure must include only one component. Single atom parts like HCl, Cl-, OH-, Na+, etc., (hydrogen atoms do not take into account) are excluded from MNA descriptors generation;
- structure (main part, see the previous sentence) must be uncharged;
- the absolute molecular weight of a substance must be less than 1250 Da.

A relevant error will be generated whenever a molecular structure does not correspond to these criteria or input data contains some other errors.

The PASS training sets for HIV-associated comorbidities include about 240,000 thoroughly selected data records about structure and biological activity of organic compounds from the general PASS training set. The knowledgebase SAR Base is created in process of training on the basis of the PASS training set.

The PASS estimations of biological activity spectra of new compounds are based on the Structure-Activity Relationships knowledge-base (SAR Base), which accumulates the results of the training set analysis. SAR Base includes a biological activities dictionary and MNA descriptors dictionary, data and knowledge on the "structure – biological activity" relationships, the database of structure of compounds from the training set with their biological activity spectra. The structure of the compound represented as a set of MNA descriptors. Unfortunately, it is currently impossible to make a large collection of biologically active compounds using only publicly available sources, for which assay results for all types of biological activity were known.

Algorithm of activity spectrum prediction description may be done easy using well known Bayesian approach. For the chemical compound  $C$ , which molecular structure is represented by the set  $\{D_1, \dots, D_m\}$  of  $m$  MNA descriptors, estimate the probability  $P(A|C)$  that the compound  $C$  has an activity  $A$ . According to the Bayes formula:

$$P(A|C) = \frac{P(A)P(C|A)}{P(C)} \quad (9)$$

where  $P(A)$  is the activity  $A$  prior probability;  $P(C|A)$  is the conditional probability of compound  $C$  providing that it has activity  $A$ ;  $P(C)$  is the compound  $C$  prior probability.

On the assumption that descriptors  $D_1, \dots, D_m$  are independent one can write the probability  $P(C|A)$  as the product of conditional probabilities for particular descriptors:

$$P(C|A) \cong P(D_1, \dots, D_m|A) = \prod_{i=1}^m P(D_i|A)$$

This expression is approximately true since the MNA descriptors are a fortiori dependent due to their generation method. However, we have not acceptable alternatives, and we cannot forget about the approximation of obtained formulas.

After simple transformations, we obtain the expression for the log-likelihood ratio of the conditional probabilities  $P(A|C)$  for activity  $A$  and  $P(B|C)$  for activity  $B$  as:

$$\ln \left[ \frac{P(A|C)}{P(B|C)} \right] \cong \ln \left[ \frac{P(A)}{P(B)} \right] + \sum_{i=1}^m \left\{ \ln \left[ \frac{P(A|D_i)}{P(B|D_i)} \right] - \ln \left[ \frac{P(A)}{P(B)} \right] \right\}$$

In a particular case, where  $B$  is the lack of activity  $A$ , we obtain:

$$\ln \left[ \frac{P(A|C)}{1 - P(A|C)} \right] \cong \ln \left[ \frac{P(A)}{1 - P(A)} \right] + \sum_{i=1}^m \left\{ \ln \left[ \frac{P(A|D_i)}{1 - P(A|D_i)} \right] - \ln \left[ \frac{P(A)}{1 - P(A)} \right] \right\}$$

The implication of the expression is quite clear: the logarithm of the posterior likelihood ratio is the sum of the logarithm of the a priori likelihood ratio and the sum of individual descriptors contributions. And, if the activity is not dependent on this descriptor, then  $P(A|D_i) = P(A)$  and the such descriptor has no affect on the results and its contribution to the sum is zero. This is the classical result of the probabilistic approach. But, apart from the already marked proximity, this result has another significant, well-known disadvantage: the contribution of some descriptors is too large and suppresses all other terms of the sum for which the conditional probability of activity is too close to 0 or 1, when its present in the structure. The most pronounced effect could be in the situation, when for probabilities  $P(A|D_i)$  used frequency estimates based on analysis of the training set and the values 0 and 1 are the rule rather than the exception.

To overcome this problem one can offer many different approaches and they were tested in the PASS development. The best result was obtained by using of so-called Fischer  $ArcSin(2p - 1)$  conversion instead of  $\ln[p/(1 - p)]$ : its shape coincides with the shape of  $\ln[p/(1 - p)]$  for almost all values of  $p$ , but  $ArcSin(2 - 1)$  values are bounded by the values  $\pm\pi/2$ . The accuracy of prediction also improved after changing the sum of descriptor contributions by the their average value, that apparently compensates for the assumption of descriptors independence. Logarithm of the a priori likelihood ratio has little information about a specific predicted organic compound and can be omitted.

Bayesian approach described above explains why PASS prediction algorithm based on the following specific statistics: on the basis of a molecular structure represented by the set  $\{D_1, \dots, D_m\}$  of  $m$  MNA descriptors, the  $B_k$  values are calculated for each activity  $A_k$ :

$$B_k = \frac{S_k - S_{0k}}{1 - S_k \cdot S_{0k}}$$

$$S_k = \text{Sin} \left[ \sum_i \text{ArcSin}(2P(A_k|D_i) - 1)/m \right]$$

$$S_{0k} = 2P(A_k) - 1$$

For each kind of activity, if for all descriptors of molecule  $P(A_k|D_i) = 1$ , then  $B_k = 1$ ; if for all descriptors of molecule  $P(A_k|D_i) = 0$ , then  $B_k = -1$ ; if the relationship between descriptors of molecule and activity  $A_k$  does not exist and  $P(A_k|D_i) \approx P(A_k)$ , then  $B_k \approx 0$ .

The PASS prediction algorithm uses the following data on the "structure-activity" relationships:

$N$  is the total number of compounds in the SAR Base;

$N_i$  is the number of compounds contained descriptor  $D_i$  in the structure description;

$N_k$  is the number of compounds contained the activity  $A_k$  in the activity spectrum;

$N_{ik}$  is the number of compounds contained both the activity  $A_k$  and the descriptor  $A_k$ .

The simplest frequency estimations of probabilities  $P(A_k)$  и  $P(A_k|D_i)$  are given by:

$$P(A_k) = \frac{N_k}{N}, \quad P(A_k|D_i) = \frac{N_{ik}}{N_i}$$

Estimation of PASS prediction accuracy and dependency required for calculation probabilities  $Pa$  and  $Pi$  on the basis of  $B$  statistics, are the end result of the training procedure, which consists in the following. According to the SAR Base, formed on the basis of the training set, for each kind of activity  $A_k$ , for each  $N_k$  active, and for each  $N - N_k$  inactive compound,  $B$  statistics values are calculated. Calculations are carried out in the Leave-One-Out Cross-Validation (LOO CV), i.e., after the "exclusion" of the compound from SAR Base, for what is enough to not include it in sum. Smooth estimations of the distribution functions  $Pa(B)$  and  $Pi(B)$  are based on the obtained sets of  $B$  statistics.

The probabilities  $Pa$  and  $Pi$  are both the measures of belonging to subsets of "active" and "inactive" compounds, and the probabilities of the 1<sup>st</sup> and 2<sup>nd</sup> kinds of prediction error, respectively. These two interpretations of the probabilities  $Pa$  and  $Pi$  are equivalent and can be used for understanding the results of prediction. It allows constructing different criteria for analyzing the results of prediction corresponding to the solution of specific practical problems.

An important feature of the PASS prediction algorithm is its robustness to the imperfection of information on the structure and biological activity spectrum of organic compounds in the training set. In a special study was showed that halving the actual well-known information about the structure or activity of organic compounds in the training set only slightly reduces the accuracy of prediction in cross-validation. There's demonstrated that the accuracy base on a LOO CV is even more rigid than for cross-validation.

## 5. Qualitative Characteristics of the (Q)SAR Models

Here we summarize the information on developed quantitative models for HIV-1 protease, reverse transcriptase, integrase, REV and classification model for TAT.

Number of structures in the training sets, cross-validated determination coefficient ( $Q^2$ ) and root-mean-square-errors (RMSE) for quantitative models and sensitivity, specificity values are shown in Table 3.

**Table 3.** QSAR models developed in GUSAR program for HIV-1 targets.

| Training set                       | Structures | Q <sup>2</sup> | RMSE        |
|------------------------------------|------------|----------------|-------------|
| HIV-1 Protease pIC50:              | 1440       | 0.81           | 0.64        |
| HIV-1 Reverse transcriptase pIC50: | 1393       | 0.68           | 0.60        |
| HIV-1 Integrase pIC50:             | 1436       | 0.83           | 0.56        |
| HIV-1 REV pIC50:                   | 105        | 0.55           | 0.34        |
| Training set                       | Structures | Sensitivity    | Specificity |
| HIV-1 TAT:                         | 2566       | 0.79           | 0.82        |

The following Predicted versus Observed plots (Figures 4-8) correspond to each model. Plots visualize  $Q^2$  and RMSE values and show the studied p(IC50) prediction range and adequate homoscedasticity of prediction results.

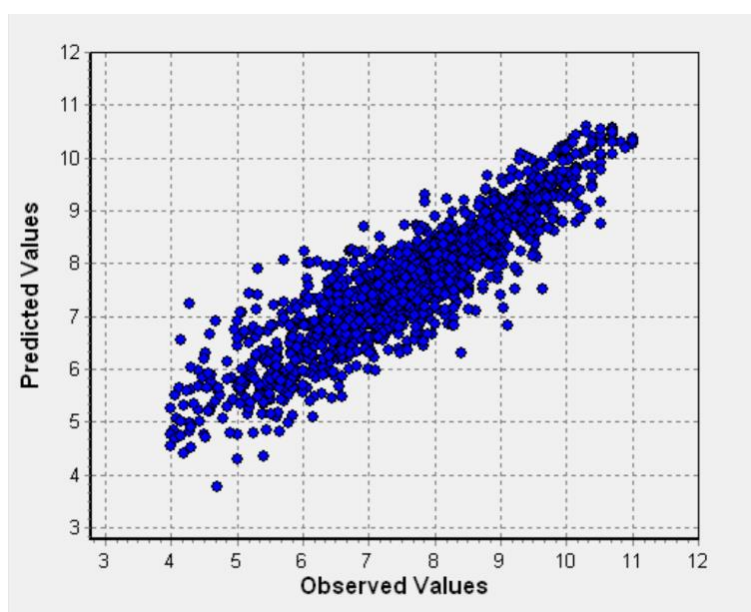

**Figure 4.** Observed versus Predicted plot for pIC50 activities of HIV-1 protease

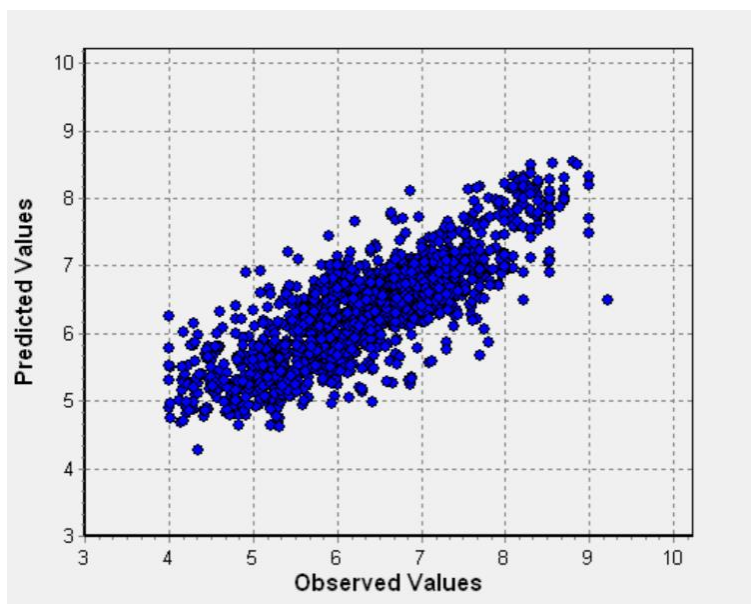

**Figure 5.** Observed versus Predicted plot for pIC50 activities of HIV-1 reverse transcriptase

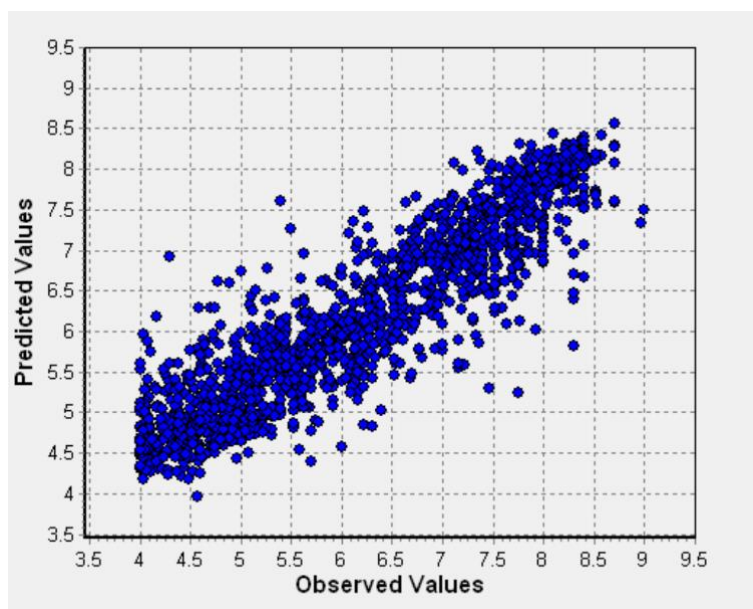

**Figure 6.** Observed versus Predicted plot for pIC50 activities of HIV-1 integrase

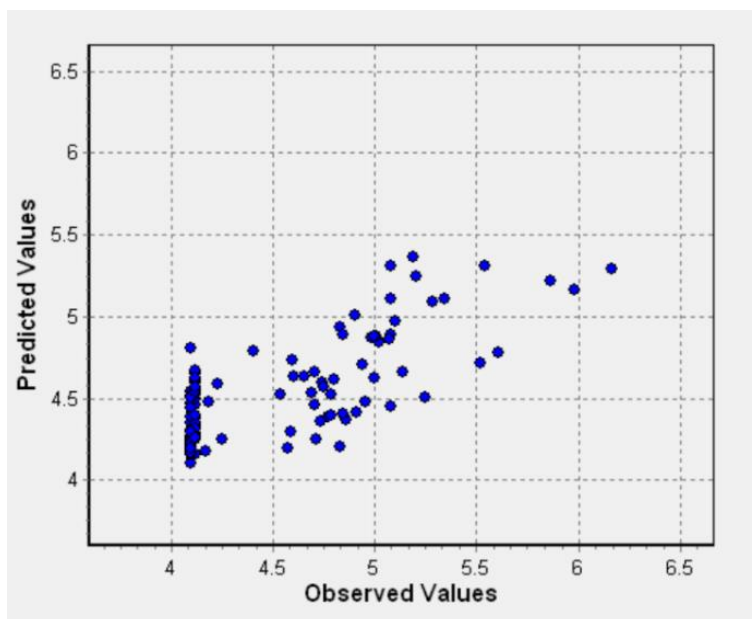

**Figure 7.** Observed versus Predicted plot for pIC50 activities of HIV-1 REV

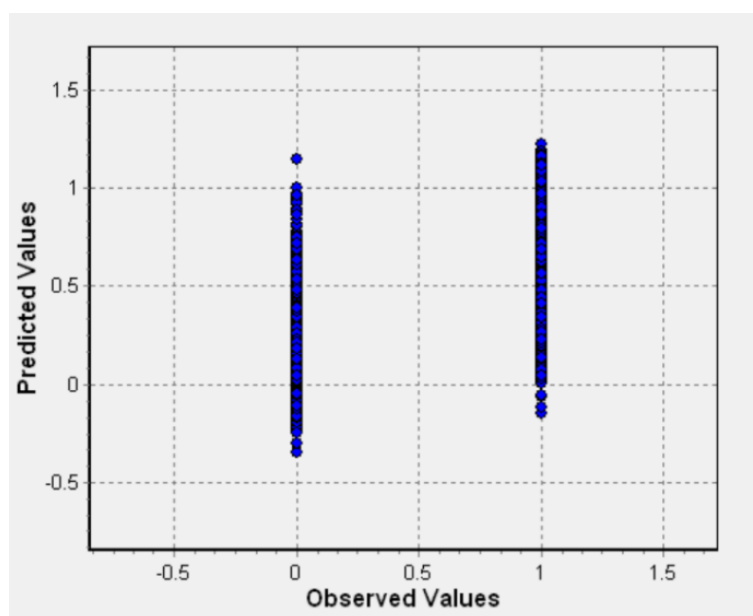

**Figure 8.** Observed versus Predicted plot for pIC50 activities of TAT (classification model)

## 6. List of Predicted Activities

List of 81 activities associated with treatment of HIV-associated disorders and diseases is represented in Table 4. For each activity the number of compounds in the training set (N) and invariant accuracy of prediction (IAP) is given (IAP equivalent to AUC ROC value).

**Table 4.** Activities associated with treatment of HIV-associated disorders and diseases.

| <b>HIV-associated comorbidity</b>       | <b>N</b> | <b>IAP</b> |
|-----------------------------------------|----------|------------|
| Alzheimer's disease treatment           | 2639     | 0.9        |
| Amyotrophic lateral sclerosis treatment | 463      | 0.94       |
| Analgesic                               | 16272    | 0.88       |
| Antiamyloidogenic                       | 284      | 0.92       |
| Antianorexic                            | 102      | 0.96       |
| Antiarthritic                           | 13767    | 0.87       |
| Antidepressant                          | 11164    | 0.92       |
| Antidiabetic                            | 21403    | 0.89       |
| Antidiabetic (type 2)                   | 3182     | 0.94       |
| Antifungal                              | 5074     | 0.93       |
| Antiinflammatory                        | 9804     | 0.86       |
| Antileprosy                             | 82       | 0.94       |
| Antileukemic                            | 5109     | 0.94       |
| Antimigraine                            | 2172     | 0.95       |
| Antineoplastic (bladder cancer)         | 378      | 0.9        |
| Antineoplastic (brain cancer)           | 1008     | 0.9        |
| Antineoplastic (breast cancer)          | 5668     | 0.92       |
| Antineoplastic (colorectal cancer)      | 5740     | 0.94       |
| Antineoplastic (endocrine cancer)       | 236      | 0.88       |
| Antineoplastic (gastric cancer)         | 635      | 0.92       |



|                                                    |       |      |
|----------------------------------------------------|-------|------|
| Antineoplastic (hematological cancer)              | 80    | 0.75 |
| Antineoplastic (liver cancer)                      | 412   | 0.9  |
| Antineoplastic (lymphocytic leukemia)              | 2813  | 0.96 |
| Antineoplastic (lymphoma)                          | 992   | 0.94 |
| Antineoplastic (melanoma)                          | 1714  | 0.93 |
| Antineoplastic (multiple myeloma)                  | 208   | 0.88 |
| Antineoplastic (myeloid leukemia)                  | 133   | 0.81 |
| Antineoplastic (non-Hodgkin's lymphoma)            | 83    | 0.85 |
| Antineoplastic (non-small cell lung cancer)        | 965   | 0.91 |
| Antineoplastic (ovarian cancer)                    | 2047  | 0.95 |
| Antineoplastic (pancreatic cancer)                 | 360   | 0.89 |
| Antineoplastic (renal cancer)                      | 547   | 0.9  |
| Antineoplastic (sarcoma)                           | 331   | 0.92 |
| Antineoplastic (small cell lung cancer)            | 211   | 0.87 |
| Antineoplastic (solid tumors)                      | 778   | 0.88 |
| Antineoplastic antibiotic                          | 1697  | 0.98 |
| Antineurogenic pain                                | 1162  | 0.92 |
| Antiobesity                                        | 12280 | 0.91 |
| Antiprotozoal (Leishmania)                         | 1988  | 0.95 |
| Antismoking                                        | 220   | 0.97 |
| Antiviral (Hepatitis B)                            | 449   | 0.96 |
| Antiviral (Hepatitis C)                            | 6807  | 0.97 |
| Antiviral (Papilloma)                              | 77    | 0.95 |
| Atherosclerosis treatment                          | 4552  | 0.89 |
| Attention deficit/hyperactivity disorder treatment | 676   | 0.97 |

|                                       |       |      |
|---------------------------------------|-------|------|
| Autoimmune disorders treatment        | 8944  | 0.88 |
| Biliary tract disorders treatment     | 97    | 0.9  |
| Cachexia treatment                    | 265   | 0.96 |
| Cancer associated disorders treatment | 51    | 0.87 |
| Cocain dependency treatment           | 235   | 0.96 |
| Cognition disorders treatment         | 11383 | 0.9  |
| Cystic fibrosis treatment             | 622   | 0.94 |
| Dependence treatment                  | 2076  | 0.94 |
| Dermatologic                          | 7173  | 0.9  |
| Diabetic neuropathy treatment         | 61    | 0.81 |
| Endocrine disorders treatment         | 16    | 0.84 |
| Female sexual dysfunction treatment   | 129   | 0.97 |
| Gastric emptying disorders treatment  | 99    | 0.96 |
| Gastrointestinal disorders treatment  | 305   | 0.93 |
| Gynecological disorders treatment     | 1084  | 0.98 |
| Heart failure treatment               | 1632  | 0.94 |
| Immunomodulator                       | 2776  | 0.91 |
| Immunostimulant                       | 1135  | 0.92 |
| Immunosuppressant                     | 4252  | 0.89 |
| Inflammatory Bowel disease treatment  | 2987  | 0.91 |
| Lipoprotein disorders treatment       | 4667  | 0.95 |
| Macular degeneration treatment        | 256   | 0.94 |
| Multiple sclerosis treatment          | 3001  | 0.92 |
| Myelodysplastic syndrome treatment    | 52    | 0.75 |
| Neuropathy treatment                  | 26    | 0.89 |

|                                    |       |      |
|------------------------------------|-------|------|
| Pancreatic disorders treatment     | 400   | 0.97 |
| Preneoplastic conditions treatment | 8     | 0.87 |
| Prostate cancer treatment          | 2944  | 0.93 |
| Psychotropic                       | 32069 | 0.87 |
| Renal disease treatment            | 1788  | 0.95 |
| Rheumatoid arthritis treatment     | 1925  | 0.9  |
| Scleroderma treatment              | 22    | 0.84 |
| Sickle-cell anemia treatment       | 55    | 0.93 |
| Sleep apnea treatment              | 79    | 0.95 |
| Sleep disorders treatment          | 2425  | 0.96 |
| Wound healing agent                | 638   | 0.94 |

## 7. Examples of Predictions for the Widely Used Antiretroviral Drugs

Prediction results for FDA approved protease, integrase and non-nucleotide reverse transcriptase inhibitors is represented below. All values are p(IC<sub>50</sub>) values for molar concentrations (e.g. for p(IC<sub>50</sub>) = 7.742 IC = 18.11 nM). Prediction results for these inhibitors are close to the average experimental values (even for those which are not in applicability domain).

### Protease inhibitors

|               |       |       |
|---------------|-------|-------|
| Amprenavir    | 8.751 | in AD |
| Atazanavir    | 7.351 | in AD |
| Darunavir     | 8.342 | in AD |
| Indinavir     | 9.035 | in AD |
| Fosamprenavir | 8.491 | in AD |
| Lopinavir     | 7.741 | in AD |
| Nelfinavir    | 8.074 | in AD |
| Ritonavir     | 8.946 | in AD |
| Tipranavir    | 7.158 | in AD |

### NN Reverse transcriptase inhibitors

|             |       |           |
|-------------|-------|-----------|
| Efavirenz   | 7.289 | in AD     |
| Etravirine  | 7.246 | not in AD |
| Delavirdine | 6.666 | in AD     |
| Doravirine  | 6.403 | not in AD |
| Nevirapine  | 6.715 | in AD     |
| Rilpivirine | 7.095 | not in AD |

### Integrase inhibitors

|              |       |       |
|--------------|-------|-------|
| Dolutegravir | 8.522 | in AD |
| Elvitegravir | 6.257 | in AD |
| Raltegravir  | 7.33  | in AD |

An example of HIV-1 activity prediction for Saquinavir, one of the FDA approved HIV-1 protease inhibitors, is given in Figure 9. The prediction for protease inhibiting activity is close to yje experimental values. The high p(IC<sub>50</sub>) value for reverse transcriptase inhibiting activity could be ignored because prediction does not correspond to the applicability domain. Prediction of integrase inhibiting activity reflects that Saquinavir is not integrase inhibitor.

## HIV TARGETS PREDICTION RESULTS

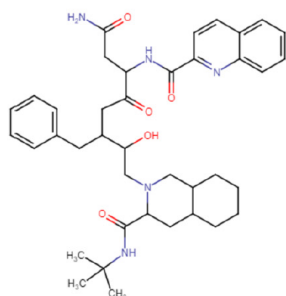

| Targets                        | Value                | Prediction | Applicability Domain |
|--------------------------------|----------------------|------------|----------------------|
| Protease (HIV-1):              | p(IC <sub>50</sub> ) | 8.977      | in AD                |
| Reverse Transcriptase (HIV-1): | p(IC <sub>50</sub> ) | 7.404      | not in AD            |
| Integrase (HIV-1):             | p(IC <sub>50</sub> ) | 4.604      | not in AD            |

**Figure 9.** Saquinavir prediction with AntiHIV-Pred.

An example of activity spectra of HIV-1 comorbidities for Lamivudine, one of the FDA approved HIV-1 nucleotide analogue reverse transcriptase inhibitors, is given in Figure 10. The prediction shows four possible activities: antineoplastic, against myelodysplastic syndrome, antiviral (hepatitis B), antileukemic. It was experimentally confirmed that Lamivudine have some activity against hepatitis B (Nabuyuki, T., et al. Hepatology Resarch, 2002, 24, 34).

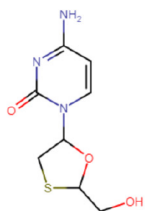

## HIV COMORBIDITIES ACTIVITY SPECTRA

| Comorbidity                        | Pa    | Pi    |
|------------------------------------|-------|-------|
| Antineoplastic (myeloid leukemia)  | 0.777 | 0.007 |
| Myelodysplastic syndrome treatment | 0.768 | 0.005 |
| Antiviral (Hepatitis B)            | 0.71  | 0.002 |
| Antileukemic                       | 0.607 | 0.009 |

**Figure 10.** Lamivudine prediction with AntiHIV-Pred.

## 8. Training Sets

### 8.1 Protease training set

|               |                                                                                                                                                  |      |    |
|---------------|--------------------------------------------------------------------------------------------------------------------------------------------------|------|----|
| CHEMBL360212  | <chem>O[C@@H](C[C@@H](Cc1ocnn1)C(=O)N[C@H]2CCOC[C@H]2O)C<br/>N3CCN(Cc4oc(cc4)c5ccc(Cl)cc5)C[C@H]3C(=O)NCC(F)(F)F</chem>                          | 0.01 | nM |
| CHEMBL364376  | <chem>O[C@@H](C[C@@H](Cc1oc(nn1)c2ccccc2)C(=O)N[C@H]3CCOC[C@H]3O)CN4CCN(Cc5oc(cc5)c6ccc(Cl)cc6)C[C@H]4C(=O)NCC(F)(F)F</chem>                     | 0.01 | nM |
| CHEMBL361443  | <chem>Cc1oc(C[C@H](C[C@H](O)CN2CCN(C[C@H]2C(=O)NCC(F)(F)F)C(C)(C)c3oc(en3)c4ccc(Cl)cc4)C(=O)N[C@H]5CCOC[C@H]5O)nn1</chem>                        | 0.01 | nM |
| CHEMBL364409  | <chem>CCCc1oc(C[C@H](C[C@H](O)CN2CCN(C[C@H]2C(=O)NCC(F)(F)F)C(C)(C)c3oc(en3)c4ccc(F)cc4)C(=O)N[C@H]5CCOC[C@H]5O)nn1</chem>                       | 0.01 | nM |
| CHEMBL116954  | <chem>CC(C)(C)NC(=O)[C@@H]1CN(CCN1C[C@@H](O)C[C@@H](Cc2c<br/>cccc2)C(=O)NC3[C@H](O)Cc4ccccc34)S(=O)(=O)c5cccc6ccnc56</chem>                      | 0.01 | nM |
| CHEMBL433165  | <chem>CC(C)(C)NC(=O)[C@@H]1CN(CCN1C[C@@H](O)C[C@@H](Cc2c<br/>cnc2)C(=O)N[C@@H]3[C@H](O)Cc4ccccc34)S(=O)(=O)c5cccc6cc<br/>nc56</chem>             | 0.02 | nM |
| CHEMBL373039  | <chem>CC(C)(N1CCN(C[C@@H](O)C[C@@H](Cc2cc3cnccc3s2)C(=O)N[C@H]4[C@H](O)COc5ccccc45)[C@@H](C1)C(=O)NCC(F)(F)F)c6oc<br/>(cn6)c7ccc(Cl)cc7</chem>   | 0.02 | nM |
| CHEMBL364407  | <chem>CC(C)(N1CCN(C[C@@H](O)C[C@@H](Cc2ocnn2)C(=O)N[C@H]3<br/>CCOC[C@H]3O)[C@@H](C1)C(=O)NCC(F)(F)F)c4oc(en4)c5ccc(F)c<br/>c5</chem>             | 0.02 | nM |
| CHEMBL321814  | <chem>O[C@@H](C[C@@H](Cc1ccnc1)C(=O)N[C@@H]2[C@H](O)COc3<br/>ccccc23)CN4CCN(Cc5oc6c(Cl)cccc6c5)C[C@H]4C(=O)NCC(F)(F)F</chem>                     | 0.02 | nM |
| CHEMBL435095  | <chem>CC(C)(N1CCN(C[C@@H](O)C[C@@H](Cc2oc(nn2)c3ccccc3)C(=O)<br/>N[C@H]4CCOC[C@H]4O)[C@@H](C1)C(=O)NCC(F)(F)F)c5oc(en5)<br/>c6ccc(F)cc6</chem>   | 0.02 | nM |
| CHEMBL3706622 | <chem>CC(C)(N1CCN(C[C@@H](O)C[C@@H](Cc2ccccc2)C(=O)N[C@@H]3[C@H](O)COc4ccccc34)[C@@H](C1)C(=O)NCC(F)(F)F)c5oc(en5)<br/>c6nccc6Cl</chem>          | 0.02 | nM |
| CHEMBL364404  | <chem>Cc1oc(C[C@H](C[C@H](O)CN2CCN(C[C@H]2C(=O)NCC(F)(F)F)C<br/>(C)(C)c3oc(en3)c4ccc(F)cc4)C(=O)N[C@H]5CCOC[C@H]5O)nn1</chem>                    | 0.02 | nM |
| CHEMBL3706615 | <chem>COc1cncc(c1)c2oc(nc2)C(C)(C)N3CCN(C[C@@H](O)C[C@@H](Cc4<br/>ccccc4)C(=O)N[C@@H]5[C@H](O)COc6ccccc56)[C@@H](C3)C(=O)<br/>)NCC(F)(F)F</chem> | 0.02 | nM |
| CHEMBL381630  | <chem>CC(C)(N1CCN(C[C@@H](O)C[C@@H](Cc2oc3cnccc3c2)C(=O)N[C@H]4[C@H](O)COc5ccccc45)[C@@H](C1)C(=O)NCC(F)(F)F)c6oc<br/>(cn6)c7ccc(Cl)cc7</chem>   | 0.02 | nM |
| CHEMBL3085527 | <chem>CC[C@H](C)[C@H](NC(=O)[C@H](C\C=C\C1CCCC1)C[C@H](O)[C@H](Cc2ccccc2)NC(=O)OC(C)(C)C(=O)NCc3nc4ccccc4[nH]3</chem>                            | 0.03 | nM |
| CHEMBL96352   | <chem>CC(C)(C)NC(=O)[C@@H]1CN(CCN1C[C@@H](O)C[C@@H](Cc2c<br/>cnc2)C(=O)N[C@@H]3[C@H](O)Cc4ccccc34)S(=O)(=O)c5cccc6cc<br/>nc56</chem>             | 0.03 | nM |
| CHEMBL3706623 | <chem>O[C@@H](C[C@@H](Cc1ccccc1)C(=O)N[C@@H]2[C@H](O)COc3<br/>ccccc23)CN4CCN(Cc5oc(cc5)c6ccccc6)C[C@H]4C(=O)NCC(F)(F)F</chem>                    | 0.03 | nM |
| CHEMBL52669   | <chem>Cc1ccccc1)c1CN(C(=O)[C@H]2N(CSC2(C)C)C(=O)[C@@H](O)C[C@H](Cc3ccccc3)C(=O)N[C@@H]4[C@H](O)COc5ccccc45</chem>                                | 0.03 | nM |
| CHEMBL421568  | <chem>CC(C)(C)NC(=O)[C@@H]1CN(Cc2cc(Br)cs2)CCN1C[C@@H](O)C[C@@H](Cc3ccccc3)C(=O)N[C@@H]4[C@H](O)Cc5ccccc45</chem>                                | 0.03 | nM |
| CHEMBL439513  | <chem>Cc1cnccc1c2oc(C[C@H](C[C@H](O)CN3CCN(Cc4oc(en4)c5ccc(Cl)c<br/>c5)C[C@H]3C(=O)NCC(F)(F)F)C(=O)N[C@@H]6[C@H](O)COc7ccc<br/>cc67)cc2</chem>   | 0.03 | nM |
| CHEMBL419396  | <chem>O[C@@H](C[C@@H](Cc1ccnc1)C(=O)N[C@@H]2[C@H](O)COc3<br/>ccccc23)CN4CCN(CC5=CC6C=CSC6S5)C[C@H]4C(=O)NCC(F)(F)F</chem>                        | 0.03 | nM |

|               |                                                                                                                                           |      |    |
|---------------|-------------------------------------------------------------------------------------------------------------------------------------------|------|----|
| CHEMBL321260  | <chem>O[C@@H](C[C@@H](Cc1cncnc1)C(=O)N[C@@H]2[C@H](O)COc3cccc23)CN4CCN(Cc5oc6c(Cl)cccc6c5)C[C@H]4C(=O)NCC(F)(F)F</chem>                   | 0.03 | nM |
| CHEMBL197493  | <chem>O[C@@H](C[C@@H](Cc1cc2cnccc2s1)C(=O)N[C@@H]3[C@H](O)COc4cccc34)CN5CCN(Cc6oc(cc6)c7ccc(Cl)cc7)C[C@H]5C(=O)NCC(F)(F)F</chem>          | 0.03 | nM |
| CHEMBL372527  | <chem>Cc1cncnc1c2oc(C[C@H](C[C@H](O)CN3CCN(C[C@H]3C(=O)NCC(F)(F)F)C(C)(C)c4ncc(s4)c5ccc(Cl)cc5)C(=O)N[C@@H]6[C@H](O)COc7cccc67)cc2</chem> | 0.03 | nM |
| CHEMBL2062160 | <chem>O[C@@H](C[C@@H](Cc1cccc1)C(=O)N[C@@H]2[C@H](O)Cc3cccc23)[C@H](Cc4cccc4)NC(=O)OC5CCOC5</chem>                                        | 0.03 | nM |
| CHEMBL370179  | <chem>Cc1cncnc1c2oc(C[C@H](C[C@H](O)CN3CCN(Cc4ccc(s4)c5ccc(Cl)cc5)C[C@H]3C(=O)NCC(F)(F)F)C(=O)N[C@@H]6[C@H](O)COc7cccc67)cc2</chem>       | 0.04 | nM |
| CHEMBL298189  | <chem>Cc1cccc(C)c1CNC(=O)[C@H]2N(CSC2(C)C)C(=O)[C@@H](O)C[C@@H](Cc3cccc3)C(=O)N[C@@H]4[C@H](O)Cc5cccc45</chem>                            | 0.04 | nM |
| CHEMBL433270  | <chem>CC1(C)SCN([C@@H]1C(=O)NCc2c(Cl)cccc2Cl)C(=O)[C@@H](O)C[C@@H](Cc3cccc3)C(=O)N[C@@H]4[C@H](O)COc5cccc45</chem>                        | 0.04 | nM |
| CHEMBL3706621 | <chem>CC(C)(N1CCN(C[C@@H](O)C[C@@H](Cc2cccc2)C(=O)N[C@@H]3[C@H](O)COc4cccc34)[C@@H](C1)C(=O)NCC(F)(F)F)c5oc(cn5)c6cccn6</chem>            | 0.04 | nM |
| CHEMBL326796  | <chem>O[C@@H](C[C@@H](Cc1cncnc1)C(=O)N[C@@H]2[C@H](O)COc3cccc23)CN4CCN(Cc5oc(cc5)c6cccc6)C[C@H]4C(=O)NCC(F)(F)F</chem>                    | 0.04 | nM |
| CHEMBL300140  | <chem>CC(C)[C@@H]1[C@@H](CCS1(=O)=O)OC(=O)N[C@@H](Cc2cccc2)[C@H](O)CN3CCN(Cc4ccc(s4)c5cccs5)C[C@H]3C(=O)NC(C)(C)C</chem>                  | 0.04 | nM |
| CHEMBL324461  | <chem>O[C@@H](C[C@@H](Cc1cccnc1)C(=O)N[C@@H]2[C@H](O)COc3cccc23)CN4CCN(Cc5oc6cccc6c5)C[C@H]4C(=O)NCC(F)(F)F</chem>                        | 0.04 | nM |
| CHEMBL3706613 | <chem>CC(C)(N1CCN(C[C@@H](O)C[C@@H](Cc2ccc3nccc3s2)C(=O)N[C@@H]4[C@H](O)COc5cccc45)[C@@H](C1)C(=O)NCC(F)(F)F)c6ncc(s6)c7ccc(Cl)cc7</chem> | 0.04 | nM |
| CHEMBL382951  | <chem>CC(C)(C)OC(=O)N[C@@H](Cc1cccc1)[C@@H](O)CC(Cc2ccc(OCC(=O)O)cc2)C(=O)NC3[C@H](O)Cc4cccc34</chem>                                     | 0.04 | nM |
| CHEMBL295414  | <chem>Cc1nsc(C)c1CNC(=O)[C@H]2N(CSC2(C)C)C(=O)[C@@H](O)C[C@@H](Cc3cccc3)C(=O)N[C@@H]4[C@H](O)COc5cccc45</chem>                            | 0.05 | nM |
| CHEMBL300754  | <chem>O[C@@H](C[C@@H](Cc1cccc1)C(=O)N[C@@H]2[C@H](O)COc3cccc23)CN4CCN(Cc5oc(cc5)c6cccn6)C[C@H]4C(=O)NCC(F)(F)F</chem>                     | 0.05 | nM |
| CHEMBL3706619 | <chem>CC(C)[C@H](NC(=O)[C@@H](C[C@H](O)[C@H](Cc1cccc1)NC(=O)OC(C)(C)Cc2cccc2)C(=O)NCC(O)CO</chem>                                         | 0.05 | nM |
| CHEMBL100310  | <chem>O[C@@H](C[C@@H](Cc1cc2cnccc2s1)C(=O)N[C@@H]3[C@H](O)COc4cccc34)CN5CCN(Cc6ccc(s6)c7ccc(Cl)cc7)C[C@H]5C(=O)NCC(F)(F)F</chem>          | 0.05 | nM |
| CHEMBL199209  | <chem>O[C@@H](C[C@@H](Cc1oc2nccc2c1)C(=O)N[C@@H]3[C@H](O)COc4cccc34)CN5CCN(Cc6oc(cc6)c7ccc(Cl)cc7)C[C@H]5C(=O)NCC(F)(F)F</chem>           | 0.05 | nM |
| CHEMBL370736  | <chem>CC(C)(N1CCN(C[C@@H](O)C[C@@H](Cc2cccc2)C(=O)N[C@@H]3[C@H](O)COc4cccc34)[C@@H](C1)C(=O)NCC(F)(F)F)c5oc(cc5)c6ccncc6</chem>           | 0.05 | nM |
| CHEMBL3706620 | <chem>CC(C)(C)NC(=O)[C@@H]1CN(Cc2cc3sccc3s2)CCN1[C@@H](O)C[C@@H](Cc4cncnc4)C(=O)N[C@@H]5[C@H](O)Cc6cccc56</chem>                          | 0.05 | nM |
| CHEMBL96697   | <chem>CC(C)(C)NC(=O)[C@@H]1CN(Cc2cc3ccsc3s2)CCN1[C@@H](O)C[C@@H](Cc4cncnc4)C(=O)N[C@@H]5[C@H](O)Cc6cccc56</chem>                          | 0.06 | nM |
| CHEMBL96100   | <chem>CN(C)c1ncc(nc1Cl)C(=O)N[C@@H]([C@H]2CCOC2)C(=O)N[C@@H](Cc3cccc3)[C@H](O)CN4C[C@H]5CCCC[C@H]5C[C@H]4C(=O)NC(C)(C)C</chem>            | 0.06 | nM |
| CHEMBL75904   |                                                                                                                                           | 0.06 | nM |

|               |                                                                                                                                        |      |    |
|---------------|----------------------------------------------------------------------------------------------------------------------------------------|------|----|
| CHEMBL326600  | <chem>CC(C)(C)NC(=O)[C@@H]1CN(Cc2ccc(Br)cc2S)CCN1C[C@@H](O)C[C@@H](Cc3ccccc3)C(=O)NC4[C@H](O)Cc5ccccc45</chem>                         | 0.06 | nM |
| CHEMBL3085503 | <chem>CC[C@H](C)[C@H](NC(=O)[C@@H](C[C@H](O)[C@H](Cc1ccccc1)NC(=O)OC(C)(C)C)Cc2ccccc2)C(=O)NCc3nc4ccccc4[nH]3</chem>                   | 0.06 | nM |
| CHEMBL49768   | <chem>COCCOCOCc1ccc(C[C@H](C[C@H](O)[C@H](Cc2ccccc2)NC(=O)OC(C)(C)C)C(=O)N[C@@H]3[C@H](O)Cc4ccccc34)cc1</chem>                         | 0.07 | nM |
| CHEMBL197039  | <chem>O[C@@H](C[C@@H](Cc1cc2nccc2s1)C(=O)N[C@@H]3[C@H](O)COc4ccccc34)CN5CCN(Cc6sc(n6)c7ccc(cc7)C(F)(F)F)C[C@H]5C(=O)NCC(F)(F)F</chem>  | 0.07 | nM |
| CHEMBL297720  | <chem>Cc1onc(C)c1CNC(=O)[C@H]2N(CSC2(C)C)C(=O)[C@@H](O)C[C@@H](Cc3ccccc3)C(=O)N[C@@H]4[C@H](O)COc5ccccc45</chem>                       | 0.07 | nM |
| CHEMBL52645   | <chem>Cc1ccccc1CNC(=O)[C@H]2N(CSC2(C)C)C(=O)[C@@H](O)C[C@@H](Cc3ccccc3)C(=O)N[C@@H]4[C@H](O)COc5ccccc45</chem>                         | 0.07 | nM |
| CHEMBL314510  | <chem>CC(C)(C)OC(=O)N[C@@H](Cc1ccccc1)[C@@H](O)C[C@@H](Cc2ccccc2)C(=O)N[C@H](C(=O)NCc3nc4ccccc4[nH]3)c5ccccc5</chem>                   | 0.07 | nM |
| CHEMBL326849  | <chem>O[C@@H](C[C@@H](Cc1cncnc1)C(=O)N[C@@H]2[C@H](O)COc3ccccc23)CN4CCN(CC5=CC6C=CSC6S5)C[C@H]4C(=O)NCC(F)(F)F</chem>                  | 0.07 | nM |
| CHEMBL79236   | <chem>CC(C)(N1CCN(C[C@@H](O)C[C@@H](Cc2ccccc2)C(=O)N[C@@H]3[C@H](O)COc4ccccc34)[C@@H](C1)C(=O)NCC(F)(F)F)c5oc6cncnc6c5</chem>          | 0.07 | nM |
| CHEMBL295442  | <chem>CC(C)(C)OC(=O)N[C@@H](Cc1ccccc1)[C@@H](O)C[C@@H](Cc2cc(OCCN3CC[S+](O-))CC3)cc2)C(=O)NC4[C@H](O)Cc5ccccc45</chem>                 | 0.07 | nM |
| CHEMBL310924  | <chem>CN1CCN(CC1)c2ncc(nc2Cl)C(=O)N[C@@H](C[C@H]3CCOC3)C(=O)N[C@@H](Cc4ccccc4)[C@H](O)CN5C[C@H]6CCCC[C@H]6C[C@H]5C(=O)NC(C)(C)C</chem> | 0.07 | nM |
| CHEMBL312238  | <chem>CC(C)(C)NC(=O)[C@@H]1CN(CCN1C[C@@H](O)C[C@@H](Cc2ccccc2)C(=O)N[C@@H]3[C@H](O)COc4ccccc34)C(C)(C)c5oc6cncnc6c5</chem>             | 0.08 | nM |
| CHEMBL297294  | <chem>COC(Cc1ccc(C[C@H](C[C@H](O)[C@H](Cc2ccccc2)NC(=O)OC(C)(C)C)C(=O)N[C@@H]3[C@H](O)Cc4ccccc34)cc1)OC</chem>                         | 0.08 | nM |
| CHEMBL416082  | <chem>CC(C)(C)OC(=O)N[C@@H](Cc1ccccc1)[C@@H](O)C[C@@H](Cc2cc(OCCN3CCS(=O)(=O)CC3)cc2)C(=O)NC4[C@H](O)Cc5ccccc45</chem>                 | 0.08 | nM |
| CHEMBL198531  | <chem>Cc1cncnc1c2oc(C[C@H](C[C@H](O)CN3CCN(Cc4oc(cc4)c5ccc(Cl)cc5)C[C@H]3C(=O)NCC(F)(F)F)C(=O)N[C@@H]6[C@H](O)COc7ccccc67)cc2</chem>   | 0.08 | nM |
| CHEMBL114756  | <chem>O[C@@H](C[C@@H](Cc1ccccc1)C(=O)N[C@@H]2[C@H](O)COc3ccccc23)CN4CCN(Cc5oc(cc5)c6cncnc6)C[C@H]4C(=O)NCC(F)(F)F</chem>               | 0.08 | nM |
| CHEMBL295549  | <chem>CC(C)(C)OC(=O)N[C@@H](Cc1ccccc1)[C@@H](O)C[C@@H](Cc2cc(OCCO)cc2)C(=O)NC3[C@H](O)Cc4ccccc34</chem>                                | 0.09 | nM |
| CHEMBL316454  | <chem>CC(C)(C)NC(=O)[C@@H]1CN(Cc2cc3sc3s2)CCN1C[C@@H](O)C[C@@H](Cc4ccccc4)C(=O)N[C@@H]5[C@H](O)Cc6ccccc56</chem>                       | 0.09 | nM |
| CHEMBL298393  | <chem>Cc1cccc(C)c1CNC(=O)[C@H]2N(CSC2(C)C)C(=O)[C@@H](O)C[C@@H](Cc3ccccc3)C(=O)N[C@@H]4[C@H](O)COc5ccccc45</chem>                      | 0.09 | nM |
| CHEMBL95611   | <chem>CC(C)(C)NC(=O)[C@H]1CN(CCN1C[C@H](O)C[C@@H](Cc2ccccc2)C(=O)NC3[C@H](O)Cc4ccccc34)S(=O)(=O)c5cccs5</chem>                         | 0.1  | nM |
| CHEMBL293992  | <chem>CC(C)[C@@H]1[C@@H](CCS1(=O)=O)OC(=O)N[C@@H](Cc2ccccc2)[C@H](O)CN3CCN(Cc4cc5ccccc5s4)C[C@H]3C(=O)NC(C)(C)C</chem>                 | 0.1  | nM |
| CHEMBL325829  | <chem>O[C@@H](C[C@@H](Cc1cncnc1)C(=O)N[C@@H]2[C@H](O)COc3ccccc23)CN4CCN(Cc5oc6ccccc6c5)C[C@H]4C(=O)NCC(F)(F)F</chem>                   | 0.1  | nM |
| CHEMBL3706617 | <chem>O[C@@H](C[C@@H](Cc1ccccc1)C(=O)N[C@@H]2[C@H](O)COc3ccccc23)CN4CCN(Cc5oc(en5)c6cncnc6)C[C@H]4C(=O)NCC(F)(F)F</chem>               | 0.1  | nM |
| CHEMBL44489   | <chem>CC(C)(C)OC(=O)N[C@@H](Cc1ccccc1)[C@@H](O)C[C@@H](Cc2cc(OCCO)cc2)C(=O)N[C@@H]3[C@H](O)Cc4ccccc34</chem>                           | 0.1  | nM |
| CHEMBL294392  | <chem>CC(C)[C@@H]1[C@@H](CCS1(=O)=O)OC(=O)N[C@@H](Cc2ccccc2)[C@H](O)CN3CCN(Cc4cc5ccccc5s4)C[C@H]3C(=O)NC(C)(C)C</chem>                 | 0.11 | nM |
| CHEMBL331155  | <chem>Cc1c(CN2CCN(CC(O)CC(Cc3ccccc3)C(=O)NC4C(O)Cc5ccccc45)C(C)2)C(=O)NC(C)(C)C)oc6ccccc16</chem>                                      | 0.11 | nM |



|               |                                                                                                                                        |      |    |
|---------------|----------------------------------------------------------------------------------------------------------------------------------------|------|----|
| CHEMBL197114  | <chem>Cc1ccncc1c2oc(C[C@H](C[C@H](O)CN3CCN(Cc4csc(n4)c5ccc(F)cc5)C[C@H]3C(=O)NCC(F)(F)C(=O)N[C@@H]6[C@H](O)COc7cccc67)cc2</chem>       | 0.11 | nM |
| CHEMBL73934   | <chem>CC(C)(C)NC(=O)[C@@H]1C[C@@H]2CCCC[C@@H]2CN1C[C@@H](O)[C@H](Cc3ccccc3)NC(=O)[C@@H](NC(=O)C4=CC(=O)c5cccc5O4)[C@H]6CCOC6</chem>    | 0.11 | nM |
| CHEMBL113845  | <chem>CC(C)(C)NC(=O)C1CN(Cc2cc3ccnc3s2)CCN1CC(O)CC(Cc4ccccc4)C(=O)NC5C(O)Cc6ccccc56</chem>                                             | 0.11 | nM |
| CHEMBL318777  | <chem>CC(C)(C)NC(=O)[C@@H]1CN(Cc2cc(Br)es2)CCN1C[C@@H](O)C[C@@H](Cc3ccncc3)C(=O)N[C@@H]4[C@H](O)Cc5ccccc45</chem>                      | 0.11 | nM |
| CHEMBL96645   | <chem>CC(C)(C)NC(=O)[C@@H]1CN(Cc2cc3ccsc3s2)CCN1C[C@@H](O)C[C@@H](Cc4ccncc4)C(=O)N[C@@H]5[C@H](O)Cc6ccccc56</chem>                     | 0.12 | nM |
| CHEMBL307918  | <chem>CC(C)(C)NC(=O)[C@@H]1C[C@@H]2CCCC[C@@H]2CN1C[C@@H](O)[C@H](O)[C@H](Cc3ccccc3)NC(=O)[C@@H](NC(=O)c4nc5ccccc5n4)[C@H]6CCOC6</chem> | 0.12 | nM |
| CHEMBL211715  | <chem>CC(C)CN([C@H](CO)CCCCNC(=O)[C@@H](NC(=O)OCc1ccccc1)C(c2ccccc2)c3ccccc3)S(=O)(=O)c4ccc(N)cc4</chem>                               | 0.12 | nM |
| CHEMBL301571  | <chem>Cc1ccncc1CNC(=O)[C@H]2N(CSC2(C)C)C(=O)[C@@H](O)C[C@@H](Cc3ccccc3)C(=O)N[C@@H]4[C@H](O)COc5ccccc45</chem>                         | 0.13 | nM |
| CHEMBL3706614 | <chem>O[C@@H](C[C@@H](Cc1ccccc1)C(=O)N[C@@H]2[C@H](O)COc3ccccc23)CN4CCN(Cc5oc(en5)c6ccccc6)C[C@H]4C(=O)NCC(F)(F)F</chem>               | 0.13 | nM |
| CHEMBL149166  | <chem>Cn1nc(cc1c2ccc(CN3CCN(C[C@@H](O)C[C@@H](Cc4ccccc4)C(=O)NC5[C@H](O)Cc6ccccc56)[C@@H](C3)C(=O)NC(C)(C)C)s2)C(F)(F)F</chem>         | 0.13 | nM |
| CHEMBL333828  | <chem>CC(C)(C)NC(=O)[C@@H]1CN(CCN1C[C@@H](O)C[C@@H](Cc2ccccc2)C(=O)NC3[C@H](O)Cc4ccccc34)C(=O)C5=Cc6ccccc6OC5=O</chem>                 | 0.13 | nM |
| CHEMBL297066  | <chem>COCCOCCc1ccc(C[C@H](C[C@H](O)[C@H](Cc2ccccc2)NC(=O)OC(C)(C)C)C(=O)N[C@@H]3[C@H](O)Cc4ccccc34)cc1</chem>                          | 0.13 | nM |
| CHEMBL326336  | <chem>Cc1nn(C)c2ncc(CN3CCN(C[C@@H](O)C[C@@H](Cc4ccccc4)C(=O)NC5[C@H](O)Cc6ccccc56)[C@@H](C3)C(=O)NC(C)(C)C)c(Cl)c12</chem>             | 0.14 | nM |
| CHEMBL325951  | <chem>CC(C)(C)NC(=O)[C@@H]1CN(Cc2enc3ccccc3c2)CCN1C[C@@H](O)C[C@@H](Cc4ccccc4)C(=O)NC5[C@H](O)Cc6ccccc56</chem>                        | 0.14 | nM |
| CHEMBL3706616 | <chem>O[C@@H](C[C@@H](Cc1ccccc1)C(=O)N[C@@H]2[C@H](O)COc3ccccc23)CN4CCN(Cc5oc(en5)c6ccccc6)C[C@H]4C(=O)NCC(F)(F)F</chem>               | 0.14 | nM |
| CHEMBL311953  | <chem>CC(C)(N1CCN(C[C@@H](O)C[C@@H](Cc2ccccc2)C(=O)N[C@@H]3[C@H](O)COc4ccccc34)[C@@H](C1)C(=O)NCC(F)(F)C(F)(F)F)c5oc6ccncc6c5</chem>   | 0.14 | nM |
| CHEMBL318525  | <chem>CC(C)(C)NC(=O)[C@@H]1CN(Cc2c(F)cccc2F)CCN1C[C@@H](O)C[C@@H](Cc3ccncc3)C(=O)N[C@@H]4[C@H](O)Cc5ccccc45</chem>                     | 0.14 | nM |
| CHEMBL78876   | <chem>CC(C)(C)NC(=O)[C@@H]1CN(CCN1C[C@@H](O)C[C@@H](Cc2ccccc2)C(=O)N[C@@H]3[C@H](O)Cc4ccccc34)C(C)(C)c5oc6ccncc6c5</chem>              | 0.15 | nM |
| CHEMBL309175  | <chem>CC(C)[C@H](NC(=O)C1=CC(=O)c2ccccc2O1)C(=O)N[C@@H](Cc3ccccc3)[C@H](O)CN4C[C@H]5CCCC[C@H]5C[C@H]4C(=O)NC(C)(C)C</chem>             | 0.15 | nM |
| CHEMBL431999  | <chem>CCC(C)[C@H](NC(=O)[C@@H](C[C@H](O)[C@H](Cc1ccccc1)NC(=O)OC(C)(C)C)Cc2ccccc2)C(=O)NCC(O)CO</chem>                                 | 0.15 | nM |
| CHEMBL299884  | <chem>Cc1ccncc1c1CNC(=O)[C@H]2N(CSC2(C)C)C(=O)[C@@H](O)C[C@@H](Cc3ccccc3)C(=O)N[C@@H]4[C@H](O)COc5ccccc45</chem>                       | 0.16 | nM |
| CHEMBL306974  | <chem>COC(=O)c1nc(Cl)c(N[C@@H]([C@H]2CCOC2)C(=O)N[C@@H](Cc3ccccc3)[C@H](O)CN4C[C@H]5CCCC[C@H]5C[C@H]4C(=O)NC(C)(C)C)nc1N</chem>        | 0.16 | nM |
| CHEMBL291196  | <chem>CC(C)(C)OC(=O)N[C@@H](Cc1ccccc1)[C@@H](O)C[C@@H](Cc2cc(CCO)cc2)C(=O)N[C@@H]3[C@H](O)Cc4ccccc34</chem>                            | 0.16 | nM |
| CHEMBL116628  | <chem>Cc1nc(c(C)s1)S(=O)(=O)N2CCN(C[C@@H](O)C[C@@H](Cc3ccccc3)C(=O)NC4[C@H](O)Cc5ccccc45)[C@@H](C2)C(=O)NC(C)(C)C</chem>               | 0.16 | nM |
| CHEMBL295471  | <chem>CC(C)(C)OC(=O)N[C@@H](Cc1ccccc1)[C@@H](O)C[C@@H](Cc2c</chem>                                                                     | 0.17 | nM |

|              |                                                                                                                                                                               |      |    |
|--------------|-------------------------------------------------------------------------------------------------------------------------------------------------------------------------------|------|----|
|              | <chem>cc(cc2)S(=O)(=O)C)C(=O)N[C@@H]3[C@H](O)Cc4cccc34</chem>                                                                                                                 |      |    |
| CHEMBL408413 | <chem>CC(C)(C)NC(=O)[C@@H]1CN(Cc2nc3ccoc3c2)CCN1C[C@@H](O)C[C@@H](Cc4cccc4)C(=O)NC5[C@H](O)Cc6cccc56</chem>                                                                   | 0.17 | nM |
| CHEMBL46114  | <chem>CC(C)(C)OC(=O)N[C@@H](Cc1cccc1)[C@@H](O)C[C@@H](Cc2cc(CO)cc2)C(=O)N[C@@H]3[C@H](O)Cc4cccc34</chem>                                                                      | 0.17 | nM |
| CHEMBL47610  | <chem>CC(C)(C)OC(=O)N[C@@H](Cc1cccc1)[C@@H](O)C[C@@H](CCc2nc3cccc3n2)C(=O)N[C@@H]4[C@H](O)Cc5cccc45</chem>                                                                    | 0.17 | nM |
| CHEMBL295530 | <chem>CC(C)(C)OC(=O)N[C@@H](Cc1cccc1)[C@@H](O)C[C@@H](C\C=C\c2ccc(O)cc2)C(=O)N[C@@H]3[C@H](O)Cc4cccc34</chem>                                                                 | 0.17 | nM |
| CHEMBL292193 | <chem>CC(C)[C@@H]1[C@@H](CCS1(=O)=O)OC(=O)N[C@@H](Cc2cccc2)[C@H](O)CN3CCN(Cc4cc(Br)cs4)C[C@H]3C(=O)NC(C)(C)C</chem>                                                           | 0.18 | nM |
| CHEMBL116052 | <chem>CC(C)(C)NC(=O)C1CN(Cc2oc3ncc(CO)cc3c2)CCN1CC(O)CC(Cc4cccc4)C(=O)NC5C(O)Cc6cccc56</chem>                                                                                 | 0.18 | nM |
| CHEMBL45451  | <chem>CC(C)(C)OC(=O)N[C@@H](Cc1cccc1)[C@@H](O)C[C@@H](Cc2cc(OCc3cccc3)cc2)C(=O)NC4[C@H](O)Cc5cccc45</chem>                                                                    | 0.18 | nM |
| CHEMBL47480  | <chem>CC(C)C[C@H](NC(=O)[C@H](C\C=C\c1cccc1)C[C@H](O)[C@H](Cc2cccc2)NC(=O)OC(C)(C)C)C(=O)N[C@@H](Cc3cccc3)C(=O)N</chem>                                                       | 0.19 | nM |
| CHEMBL77786  | <chem>CC(C)C1(CCc2csc(CO)c2)CC(=O)C(=C(O)O)Sc3cc(C)c(CO)cc3C(C)(C)C</chem>                                                                                                    | 0.19 | nM |
| CHEMBL325013 | <chem>Cc1cc2oc(CN3CCN(C[C@@H](O)C[C@@H](Cc4cccc4)C(=O)NC5[C@H](O)Cc6cccc56)[C@@H](C3)C(=O)NC(C)(C)C)cc2cn1</chem>                                                             | 0.19 | nM |
| CHEMBL326337 | <chem>CC(C)(C)NC(=O)C1CN(Cc2csc3ncccc23)CCN1CC(O)CC(Cc4cccc4)C(=O)NC5C(O)Cc6cccc56</chem>                                                                                     | 0.2  | nM |
| CHEMBL297673 | <chem>CC(C)(C)OC(=O)N[C@@H](Cc1cccc1)[C@@H](O)C[C@@H](Cc2cc(OCC(=O)N3CCOCC3)cc2)C(=O)NC4[C@H](O)Cc5cccc45</chem>                                                              | 0.2  | nM |
| CHEMBL276447 | <chem>CC(C)[C@H](NC(=O)[C@@H](C[C@H](O)[C@H](Cc1cccc1)NC(=O)OC(C)(C)C)Cc2cccc2)C(=O)NCc3nc4cccc4[nH]3</chem>                                                                  | 0.2  | nM |
| CHEMBL46274  | <chem>CC(C)(C)OC(=O)N[C@@H](Cc1cccc1)[C@@H](O)C[C@@H](Cc2cc(OCC[N+]3([O-])CCOCC3)cc2)C(=O)NC4[C@H](O)Cc5cccc45</chem>                                                         | 0.2  | nM |
| CHEMBL318114 | <chem>Cc1cc(O)cc(C)c1CNC(=O)[C@@H](C[C@@H](O)CN2CCN(C[C@@H]2C(=O)NC(C)(C)C)S(=O)(=O)c3ccc4N(CCc4c3)c5ncccc5)Cc6cccc6</chem>                                                   | 0.2  | nM |
| CHEMBL44578  | <chem>CN1CCN(CCOc2ccc(C[C@H](C[C@H](O)[C@H](Cc3cccc3)NC(=O)OC(C)(C)C)C(=O)NC4[C@H](O)Cc5cccc45)cc2)CC1</chem>                                                                 | 0.2  | nM |
| CHEMBL95228  | <chem>CC(C)(C)NC(=O)[C@@H]1C[C@@H]2SCC[C@@H]2CN1C[C@@H](O)[C@H](Cc3cccc3)NC(=O)[C@@H](CS(=O)(=O)c4cccc5cccnc45)NC(=O)C(F)(F)F</chem>                                          | 0.21 | nM |
| CHEMBL297189 | <chem>CC(C)(C)OC(=O)N[C@@H](Cc1cccc1)[C@@H](O)C[C@@H](Cc2ccc(O)c2)C(=O)N[C@@H]3[C@H](O)Cc4cccc34</chem>                                                                       | 0.21 | nM |
| CHEMBL295357 | <chem>CSc1ccc(C[C@H](C[C@H](O)[C@H](Cc2cccc2)NC(=O)OC(C)(C)C)C(=O)N[C@@H]3[C@H](O)Cc4cccc34)cc1</chem>                                                                        | 0.22 | nM |
| CHEMBL358139 | <chem>CN(C)c1ccc2ccc(cc2n1)S(=O)(=O)N3CCN(C[C@@H](O)C[C@@H](Cc4cccc4)C(=O)NC5[C@H](O)Cc6cccc56)[C@@H](C3)C(=O)NC(C)(C)C</chem>                                                | 0.22 | nM |
| CHEMBL98954  | <chem>CC(C)(C)NC(=O)[C@@H]1C[C@@H]2SCC[C@@H]2CN1C[C@@H](O)[C@H](Cc3cccc3)NC(=O)[C@@H](CS(=O)(=O)c4ccc(F)cc4)NS(=O)(=O)C</chem>                                                | 0.22 | nM |
| CHEMBL81840  | <chem>CC(C)(C)NC(=O)[C@@H]1CN(Cc2oc3ccncc3c2)CCN1C[C@@H](O)C[C@@H](Cc4cccc4)C(=O)N[C@@H]5[C@H](O)Cc6cccc56</chem>                                                             | 0.22 | nM |
| CHEMBL297045 | <chem>CC(C)(C)OC(=O)N[C@@H](Cc1ccc(O)cc1)[C@@H](O)C[C@@H](Cc2cccc2)C(=O)NC3[C@H](O)Cc4cccc34</chem>                                                                           | 0.23 | nM |
| CHEMBL413515 | <chem>CN(C)c1ccc(CNC(=O)[C@@H](NC(=O)c2cccc2c3cccc3)[C@@H]4N[C@@H](C(=O)NCCNC(=O)[C@@H]5N[C@H](SC5(C)C)[C@H](NC(=O)c6cccc6c7cccc7)C(=O)NCc8ccc(cc8)N(C)C)C(C)(C)S4)cc1</chem> | 0.23 | nM |
| CHEMBL329750 | <chem>CC(C)[C@H](NC(=O)[C@@H](C[C@H](O)[C@H](Cc1cccc1)NC(=O)OC(C)(C)C)Cc2cccc2)C(=O)NCc3cccc3</chem>                                                                          | 0.24 | nM |
| CHEMBL432924 | <chem>CN(C)c1nc(N)c(nc1Cl)C(=O)N[C@@H]([C@H]2CCOC2)C(=O)N[C</chem>                                                                                                            | 0.24 | nM |

|               |                                                                                                                                       |      |    |
|---------------|---------------------------------------------------------------------------------------------------------------------------------------|------|----|
|               | <chem>@@H](Cc3ccccc3)[C@H](O)CN4C[C@H]5CCCC[C@H]5C[C@H]4C(=O)NC(C)(C)C</chem>                                                         |      |    |
| CHEMBL434342  | <chem>COc1cncc(c1)c2oc(nc2)C(C)(C)N3CCN(C[C@@H](O)C[C@@H](Cc4ocnn4)C(=O)N[C@H]5CCOC[C@H]5O)[C@@H](C3)C(=O)NCC(F)(F)F</chem>           | 0.24 | nM |
| CHEMBL378044  | <chem>CC(C)CN([C@H](CO)CCCCNC(=O)[C@@H](NC(=O)Cc1ccnc1)C(c2ccccc2)c3ccccc3)S(=O)(=O)c4ccc(N)cc4</chem>                                | 0.24 | nM |
| CHEMBL52670   | <chem>CC1(C)SCN([C@@H]1C(=O)NCc2c(F)cccc2F)C(=O)[C@@H](O)C[C@@H](Cc3ccccc3)C(=O)N[C@@H]4[C@H](O)COc5ccccc45</chem>                    | 0.24 | nM |
| CHEMBL77497   | <chem>CC(C)C1(CCc2cncs2)CC(=O)C(=C(O)O1)Sc3cc(C)c(CO)cc3C(C)(C)C</chem>                                                               | 0.24 | nM |
| CHEMBL410311  | <chem>CC(C)[C@@H]1[C@@H](CCS1(=O)=O)OC(=O)N[C@@H](Cc2ccccc2)[C@H](O)CN3CCN(Cc4ccc(Br)s4)C[C@H]3C(=O)NC(C)(C)C</chem>                  | 0.25 | nM |
| CHEMBL268765  | <chem>CC(=O)N[C@@H](C[S+](O-])c1ccc2ccccc2n1)C(=O)N[C@@H](Cc3ccccc3)[C@H](O)Cc4ccccc4C(=O)NC(C)(C)C</chem>                            | 0.25 | nM |
| CHEMBL1790766 | <chem>CC[C@H](C)[C@H](NC(=O)[C@@H](C[C@H](O)[C@H](Cc1ccccc1)NC(=O)OC(C)(C)C)Cc2ccccc2)C(=O)NC(=O)C(N)Cc3ccccc3</chem>                 | 0.25 | nM |
| CHEMBL325181  | <chem>CC(C)(C)NC(=O)[C@@H]1CN(Cc2cnc3occc3c2C1)CCN1C[C@@H](O)C[C@@H](Cc4ccccc4)C(=O)NC5[C@H](O)Cc6ccccc56</chem>                      | 0.25 | nM |
| CHEMBL112257  | <chem>CSc1ncccc1CN2CCN(C[C@@H](O)C[C@@H](Cc3ccccc3)C(=O)NC4[C@H](O)Cc5ccccc45)[C@@H](C2)C(=O)NC(C)(C)C</chem>                         | 0.26 | nM |
| CHEMBL358228  | <chem>CC(C)(C)NC(=O)[C@@H]1CN(Cc2ncc(s2)c3ccccc3)CCN1C[C@@H](O)C[C@@H](Cc4ccccc4)C(=O)NC5[C@H](O)Cc6ccccc56</chem>                    | 0.26 | nM |
| CHEMBL432633  | <chem>CCOC(=O)c1cnc2oc(CN3CCN(CC(O)CC(Cc4ccccc4)C(=O)NC5C(O)Cc6ccccc56)C(C3)C(=O)NC(C)(C)C)cc2c1</chem>                               | 0.27 | nM |
| CHEMBL297620  | <chem>CC(C)(C)OC(=O)N[C@@H](Cc1ccccc1)[C@@H](O)C[C@@H](Cc2ccc(cc2)C(C)(C)C)C(=O)N[C@@H]3[C@H](O)Cc4ccccc34</chem>                     | 0.27 | nM |
| CHEMBL48565   | <chem>CC(C)[C@H](NC(=O)OCc1ccccc1)C(=O)N[C@@H](Cc2ccccc2)[C@@H](O)[C@@H](O)[C@H](Cc3ccccc3)NC(=O)[C@@H](NC(=O)OCc4ccccc4)C(C)C</chem> | 0.28 | nM |
| CHEMBL305814  | <chem>CC(C)C1(CCc2cc[nH]n2)CC(=O)C(=C(O)O1)Sc3cc(C)c(CO)cc3C(C)(C)C</chem>                                                            | 0.28 | nM |
| CHEMBL275237  | <chem>CC(=O)N[C@@H](CS(=O)(=O)c1ccc2ccccc2n1)C(=O)N[C@@H](Cc3ccccc3)[C@H](O)Cc4ccccc4C(=O)NC(C)(C)C</chem>                            | 0.29 | nM |
| CHEMBL295924  | <chem>CC(C)(C)OC(=O)N[C@@H](Cc1ccccc1)[C@@H](O)C[C@@H](C\C=C\c2ccc(CCN3CCOCC3)cc2)C(=O)N[C@@H]4[C@H](O)Cc5ccccc45</chem>              | 0.29 | nM |
| CHEMBL1233940 | <chem>CC(C)(C)NC(=O)[C@@H]1CN(Cc2oc3ccccc3c2)CCN1C[C@@H](O)C[C@@H](Cc4ccccc4)C(=O)N[C@@H]5[C@H](O)Cc6ccccc56</chem>                   | 0.3  | nM |
| CHEMBL325885  | <chem>CC(C)(C)NC(=O)[C@@H]1CN(CCN1C[C@@H](O)C[C@@H](Cc2ccccc2)C(=O)NC3[C@H](O)Cc4ccccc34)S(=O)(=O)c5ccccc5</chem>                     | 0.3  | nM |
| CHEMBL324084  | <chem>CC(C)(C)NC(=O)[C@@H]1CN(Cc2ccccc2)CCN1C[C@@H](O)C[C@@H](Cc3ccccc3)C(=O)NC4[C@H](O)Cc5ccccc45</chem>                             | 0.3  | nM |
| CHEMBL326764  | <chem>O[C@@H]1[C@@H](O)[C@@H](OCc2cncs2)[C@@H](Cc3ccccc3)S(=O)(=O)[C@H](Cc4ccccc4)[C@@H]1OCc5cncs5</chem>                             | 0.3  | nM |
| CHEMBL98710   | <chem>Cc1c(O)cccc1C(=O)N[C@@H](CSc2ccccc2)[C@H](O)CN3C[C@H]4CCS[C@H]4C[C@H]3C(=O)NC(C)(C)C</chem>                                     | 0.3  | nM |
| CHEMBL277985  | <chem>CC(=O)N[C@H](CS(=O)(=O)c1ccc2ccccc2c1)C(=O)N[C@@H](Cc3ccccc3)[C@H](O)Cc4ccccc4C(=O)NC(C)(C)C</chem>                             | 0.31 | nM |
| CHEMBL326543  | <chem>CC(C)(C)NC(=O)[C@@H]1CN(Cc2ccc(F)cc2F)CCN1C[C@@H](O)C[C@@H](Cc3ccccc3)C(=O)NC4[C@H](O)Cc5ccccc45</chem>                         | 0.31 | nM |
| CHEMBL366293  | <chem>CCCc1oc(C[C@H](C[C@H](O)CN2CCN(C[C@H]2C(=O)NCC(F)(F)F)C(C)(C)c3oc(cn3)c4cncc(OC)c4)C(=O)N[C@H]5CCOC[C@H]5O)n1</chem>            | 0.32 | nM |
| CHEMBL301269  | <chem>CC(C)[C@@H]1[C@@H](CCS1(=O)=O)OC(=O)N[C@@H](Cc2ccccc2)[C@H](O)CN3CCN(Cc4cc5sccc5s4)C[C@H]3C(=O)NC(C)(C)C</chem>                 | 0.32 | nM |
| CHEMBL324516  | <chem>CC(C)(C)NC(=O)C1CN(Cc2oc3ncccc3c2)CCN1CC(O)CC(Cc4ccccc4)</chem>                                                                 | 0.32 | nM |

|               |                                                                                                                                       |      |    |
|---------------|---------------------------------------------------------------------------------------------------------------------------------------|------|----|
|               | <chem>C(=O)NC5C(O)Cc6ccccc56</chem>                                                                                                   |      |    |
| CHEMBL101560  | <chem>O[C@@H](C[C@@H](Cc1ccccc1)C(=O)N[C@@H]2[C@H](O)Cc3ccc23)[C@H](Cc4ccccc4)NC(=O)OC5CCCC5</chem>                                   | 0.33 | nM |
| CHEMBL381583  | <chem>CC(C)CN([C@H](CO)CCCCNC(=O)[C@@H](NC(=O)c1ccc(O)c1)[N+](=O)[O-])C(c2ccccc2)c3ccccc3)S(=O)(=O)c4ccc(N)cc4</chem>                 | 0.33 | nM |
| CHEMBL274186  | <chem>CC(C)(C)NC(=O)c1ccccc1C[C@@H](O)[C@H](Cc2ccccc2)NC(=O)[C@H](CS(=O)(=O)c3ccc(Cl)cc3)NS(=O)(=O)C</chem>                           | 0.34 | nM |
| CHEMBL78261   | <chem>CC(C)C1(CCc2cocc2)CC(=O)C(=C(O)O1)Sc3cc(C)c(CO)cc3C(C)(C)C</chem>                                                               | 0.34 | nM |
| CHEMBL2062139 | <chem>CC(C)(C)NC(=O)[C@@H]1CN(CCN1C[C@@H](O)C[C@@H](Cc2ccccc2)C(=O)N[C@@H]3[C@H](O)Cc4ccccc34)C(=O)OCc5ccccc5</chem>                  | 0.35 | nM |
| CHEMBL2062137 | <chem>CC(C)(C)NC(=O)[C@@H]1CN(Cc2enc3occc3c2)CCN1C[C@@H](O)C[C@@H](Cc4ccccc4)C(=O)N[C@@H]5[C@H](O)Cc6ccccc56</chem>                   | 0.35 | nM |
| CHEMBL115080  | <chem>Cc1nn(C)c2ncc(CN3CCN(C[C@@H](O)C[C@@H](Cc4ccccc4)C(=O)NC5[C@H](O)Cc6ccccc56)[C@@H](C3)C(=O)NC(C)(C)C)cc12</chem>                | 0.35 | nM |
| CHEMBL77431   | <chem>CC(C)C1(CCc2cccs2)CC(=O)C(=C(O)O1)Sc3cc(C)c(CO)cc3C(C)(C)C</chem>                                                               | 0.35 | nM |
| CHEMBL291195  | <chem>CC(C)C[C@H](NC(=O)[C@H](CCCc1ccccc1)C[C@H](O)[C@H](Cc2ccccc2)NC(=O)OC(C)(C)C(=O)N[C@@H](Cc3ccccc3)C(=O)N</chem>                 | 0.36 | nM |
| CHEMBL82245   | <chem>CC(C)(N1CCN(C[C@@H](O)C[C@@H](Cc2ccccc2)C(=O)N[C@@H]3[C@H](O)COc4ccccc34)[C@@H](C1)C(=O)NC5CCCC5)c6oc7ccnc7c6</chem>            | 0.37 | nM |
| CHEMBL11421   | <chem>CC(C)(C)NC(=O)c1ccccc1C[C@@H](O)[C@H](Cc2ccccc2)NC(=O)[C@H](C[S+])([O-])c3ccc(F)cc3)NS(=O)(=O)C</chem>                          | 0.38 | nM |
| CHEMBL113826  | <chem>CC(C)(C)NC(=O)[C@@H]1CN(Cc2ccncc2)CCN1C[C@@H](O)C[C@@H](Cc3ccccc3)C(=O)NC4[C@H](O)Cc5ccccc45</chem>                             | 0.39 | nM |
| CHEMBL384210  | <chem>CC(C)CN([C@H](CO)CCCCNC(=O)[C@@H](NC(=O)OCc1ccncc1)C(c2ccccc2)c3ccccc3)S(=O)(=O)c4ccc(N)cc4</chem>                              | 0.39 | nM |
| CHEMBL74472   | <chem>CC(C)[C@H](NC(=O)c1cnc2ccccc2n1)C(=O)N[C@@H](Cc3ccccc3)[C@H](O)CN4C[C@H]5CCCC[C@H]5C[C@H]4C(=O)NC(C)(C)C</chem>                 | 0.39 | nM |
| CHEMBL325354  | <chem>CC(C)(C)NC(=O)[C@@H]1CN(Cc2oc3cnccc3c2)CCN1C[C@@H](O)C[C@@H](Cc4ccccc4)C(=O)NC5[C@H](O)Cc6ccccc56</chem>                        | 0.39 | nM |
| CHEMBL364552  | <chem>COc1cncc(c1)c2oc(nc2)C(C)(C)N3CCN(C[C@@H](O)C[C@@H](Cc4oc(C)nn4)C(=O)N[C@H]5CCOC[C@H]5O)[C@@H](C3)C(=O)NCC(F)(F)F</chem>        | 0.4  | nM |
| CHEMBL378134  | <chem>CC(C)CN([C@H](CO)CCCCNC(=O)[C@@H](NC(=O)c1cccc(O)c1)C(c2ccccc2)c3ccccc3)S(=O)(=O)c4ccc(N)cc4</chem>                             | 0.4  | nM |
| CHEMBL310417  | <chem>CC(C)CNC(=O)[C@@H]1CN(CCN1C[C@@H](O)C[C@@H](Cc2ccc2)C(=O)N[C@@H]3[C@H](O)COc4ccccc34)C(C)(C)c5oc6cnc6c5</chem>                  | 0.4  | nM |
| CHEMBL377826  | <chem>CC(C)CN([C@H](CO)CCCCNC(=O)[C@@H](NC(=O)c1cnccc1N)C(c2ccccc2)c3ccccc3)S(=O)(=O)c4ccc(N)cc4</chem>                               | 0.4  | nM |
| CHEMBL378829  | <chem>CC(C)CN([C@H](CO)CCCCNC(=O)[C@@H](NC(=O)c1cnccc1)C(C)c2ccccc2)c3ccccc3)S(=O)(=O)c4ccc(N)cc4</chem>                              | 0.4  | nM |
| CHEMBL49002   | <chem>CC(C)(C)NC(=O)[C@@H]1C[C@@H]2CCCC[C@@H]2CN1C[C@@H](O)[C@H](Cc3ccccc3)NC(=O)[C@@H](C[S+])([O-])c4ccc5ccccc5c4)NS(=O)(=O)C</chem> | 0.4  | nM |
| CHEMBL208879  | <chem>CC(C)CN([C@H](CO)CCCCNC(=O)[C@@H](NC(=O)c1ccncc1)C(c2ccccc2)c3ccccc3)S(=O)(=O)c4ccc(N)cc4</chem>                                | 0.4  | nM |
| CHEMBL441528  | <chem>CC(C)CN([C@H](CO)CCCCNC(=O)[C@@H](NC(=O)OC(C)(C)C)c1ccccc1)c2ccccc2)S(=O)(=O)c3ccc(N)cc3</chem>                                 | 0.4  | nM |
| CHEMBL265975  | <chem>CC(C)C1(CCc2cscc2)CC(=O)C(=C(O)O1)Sc3cc(C)c(CO)cc3C(C)(C)C</chem>                                                               | 0.41 | nM |
| CHEMBL99357   | <chem>CC(=O)N[C@H](CS(=O)(=O)c1cccc2ccncc12)C(=O)N[C@@H](Cc3ccccc3)[C@H](O)CN4C[C@H]5CCS[C@H]5C[C@H]4C(=O)NC(C)(C)C</chem>            | 0.42 | nM |
| CHEMBL298788  | <chem>CC(C)C[C@H](NC(=O)[C@@H](C[C@H](O)[C@H](Cc1ccccc1)NC(=O)OC(C)(C)C)Cc2ccc(cc2)c3ccccc3)C(=O)N[C@@H](Cc4ccccc4)C(=O)N</chem>      | 0.43 | nM |
| CHEMBL379751  | <chem>CC(C)CN([C@H](CO)CCCCNC(=O)[C@@H](NC(=O)c1ccc[nH]1)C(</chem>                                                                    | 0.43 | nM |

|              |                                                                                                                                                  |      |    |
|--------------|--------------------------------------------------------------------------------------------------------------------------------------------------|------|----|
|              | <chem>c2ccccc2)c3ccccc3)S(=O)(=O)c4ccc(N)cc4</chem>                                                                                              |      |    |
| CHEMBL49544  | <chem>CC(C)(C)OC(=O)N[C@@H](Cc1ccccc1)[C@@H](O)C[C@@H](Cc2c<br/>cc(CCCN3CCOCC3)cc2)C(=O)N[C@@H]4[C@H](O)Cc5ccccc45</chem>                        | 0.43 | nM |
| CHEMBL378557 | <chem>CC(C)CN([C@H](CO)CCCCNC(=O)[C@@H](NC(=O)C1CC1)C(c2cc<br/>ccc2)c3ccccc3)S(=O)(=O)c4ccc(N)cc4</chem>                                         | 0.43 | nM |
| CHEMBL95413  | <chem>CC(C)[C@H](NC(=O)[C@@H](C[C@H](O)[C@H](Cc1ccccc1)NC(=O)<br/>OC(C)(C)C)Cc2ccccc2)C(=O)NCCO</chem>                                           | 0.44 | nM |
| CHEMBL202345 | <chem>O[C@@H](C[C@H]1(Cc2ccccc2)N=CC(=C1O)C3C4OC(=O)N[C@@H<br/>]4c5ccccc35)[C@H](Cc6ccccc6)NC(=O)O[C@H]7CCOC7</chem>                             | 0.44 | nM |
| CHEMBL11143  | <chem>CC(C)(C)NC(=O)c1ccccc1C[C@@H](O)[C@H](Cc2ccccc2)NC(=O)[C<br/>@H](CS(=O)(=O)c3cccc4ccccc34)NS(=O)(=O)C</chem>                               | 0.44 | nM |
| CHEMBL379162 | <chem>CC(C)CN([C@H](CO)CCCCNC(=O)[C@@H](NC(=O)N(C)C)C(c1cc<br/>ccc1)c2ccccc2)S(=O)(=O)c3ccc(N)cc3</chem>                                         | 0.44 | nM |
| CHEMBL296137 | <chem>CC(C)(C)OC(=O)N[C@@H](Cc1ccccc1)[C@@H](O)C[C@@H](Cc2c<br/>cc(F)cc2)C(=O)N[C@@H]3[C@H](O)Cc4ccccc34</chem>                                  | 0.44 | nM |
| CHEMBL11116  | <chem>CC(C)(C)NC(=O)c1ccccc1C[C@@H](O)[C@H](Cc2ccccc2)NC(=O)[C<br/>@H](C[S+](O-))c3cccc4ccccc34)NS(=O)(=O)C</chem>                               | 0.45 | nM |
| CHEMBL306963 | <chem>CC(C)C1(CCc2nc(C)cs2)CC(=O)C(=C(O)O1)Sc3cc(C)c(CO)cc3C(C)(<br/>C)C</chem>                                                                  | 0.45 | nM |
| CHEMBL98129  | <chem>CCC(C)[C@H](NC(=O)[C@@H](C[C@H](O)[C@H](Cc1ccccc1)NC(=O)<br/>OC(C)(C)C)Cc2ccccc2)C(=O)NCCO</chem>                                          | 0.46 | nM |
| CHEMBL205968 | <chem>CC(C)CN([C@H](CO)CCCCNC(=O)[C@@H](NC(=O)c1ccccc1)C(c2<br/>ccccc2)c3ccccc3)S(=O)(=O)c4ccc(N)cc4</chem>                                      | 0.46 | nM |
| CHEMBL97253  | <chem>CC(C)[C@H](NC(=O)[C@@H](C[C@H](O)[C@H](Cc1ccccc1)NC(=O)<br/>OC(C)(C)C)Cc2ccccc2)C(=O)NCCN</chem>                                           | 0.46 | nM |
| CHEMBL114834 | <chem>CC(C)(C)NC(=O)[C@@H]1CN(Cc2nc3ccccc3[nH]2)CCN1C[C@@H]<br/>(O)C[C@@H](Cc4ccccc4)C(=O)NC5[C@H](O)Cc6ccccc56</chem>                           | 0.47 | nM |
| CHEMBL47712  | <chem>CC(C)(C)OC(=O)N[C@@H](Cc1ccccc1)[C@@H](O)C[C@@H](Cc2c<br/>cc(OCCN3CCSCC3)cc2)C(=O)NC4[C@H](O)Cc5ccccc45</chem>                             | 0.47 | nM |
| CHEMBL98289  | <chem>Cc1cc(O)cc(C)c1CNC(=O)[C@@H](C[C@@H](O)CN2CCN(C[C@@<br/>H]2C(=O)NC(C)(C)C)S(=O)(=O)c3ccccc3)Cc4ccccc4</chem>                               | 0.47 | nM |
| CHEMBL60697  | <chem>CC(C)[C@@H]1[C@@H](CCS1(=O)=O)OC(=O)N[C@@H](Cc2cccc<br/>c2)[C@H](O)CN3CCN(Cc4csc5ccc(Cl)cc45)C[C@H]3C(=O)NC(C)(C)<br/>C</chem>             | 0.47 | nM |
| CHEMBL361062 | <chem>COc1cncc(c1)c2oc(nc2)C(C)(C)N3CCN(C[C@@H](O)C[C@@H](Cc4<br/>oc(nn4)c5ccccc5)C(=O)N[C@H]6CCOC[C@H]6O)[C@@H](C3)C(=O)<br/>)NCC(F)(F)F</chem> | 0.48 | nM |
| CHEMBL377192 | <chem>CC(C)CN([C@H](CO)CCCCNC(=O)[C@@H](NC(=O)OCc1ccccc1)C<br/>(c2ccccc2)c3ccccc3)S(=O)(=O)c4ccc(N)cc4</chem>                                    | 0.48 | nM |
| CHEMBL319053 | <chem>CC(C)(C)NC(=O)[C@@H]1CN(Cc2c(F)cccc2F)CCN1C[C@@H](O)C<br/>[C@@H](Cc3ccccc3)C(=O)N[C@@H]4[C@H](O)Cc5ccccc45</chem>                          | 0.48 | nM |
| CHEMBL116107 | <chem>CC(C)(C)NC(=O)[C@@H]1CN(Cc2ccc(Cl)nc2)CCN1C[C@@H](O)C[<br/>C@@H](Cc3ccccc3)C(=O)NC4[C@H](O)Cc5ccccc45</chem>                               | 0.49 | nM |
| CHEMBL98096  | <chem>Cc1c(O)cccc1C(=O)N[C@@H](Cc2ccccc2)[C@H](O)CN3C[C@H]4C<br/>CS[C@H]4C[C@H]3C(=O)NC(C)(C)C</chem>                                            | 0.5  | nM |
| CHEMBL379272 | <chem>CC(C)CN([C@H](CO)CCCCNC(=O)[C@@H](NC(=O)c1cnccc1O)C(c<br/>2ccccc2)c3ccccc3)S(=O)(=O)c4ccc(N)cc4</chem>                                     | 0.5  | nM |
| CHEMBL209023 | <chem>CC(C)CN([C@H](CO)CCCCNC(=O)[C@@H](N)C(c1ccccc1)c2ccccc<br/>2)S(=O)(=O)c3ccc(N)cc3</chem>                                                   | 0.5  | nM |
| CHEMBL432550 | <chem>CC(C)(N1CCN(C[C@@H](O)C[C@@H](Cc2ccccc2)C(=O)N[C@@H<br/>]3[C@H](O)COc4ccccc34)[C@@H](C1)C(=O)NCC5CC5)c6oc7cnc6<br/>7c6</chem>              | 0.5  | nM |
| CHEMBL100089 | <chem>CC(C)(C)NC(=O)[C@@H]1C[C@@H]2CCCC[C@@H]2CN1C[C@@<br/>H](O)[C@H](Cc3ccccc3)NC(=O)[C@@H](CS(=O)(=O)c4ccc5ccccc5c<br/>4)NS(=O)(=O)C</chem>    | 0.5  | nM |
| CHEMBL209452 | <chem>COc1cc(ccc1O)C(=O)N[C@H](C(c2ccccc2)c3ccccc3)C(=O)NCCCC[C<br/>@@H](CO)N(CC(C)C)S(=O)(=O)c4ccc(N)cc4</chem>                                 | 0.5  | nM |

|              |                                                                                                                                      |      |    |
|--------------|--------------------------------------------------------------------------------------------------------------------------------------|------|----|
| CHEMBL316694 | CC(=O)N[C@H](CS(=O)(=O)c1ccc2ccccc2c1)C(=O)N[C@@H](Cc3ccc3)[C@H](O)CN4C[C@H]5CCS[C@H]5C[C@H]4C(=O)NC(C)(C)C                          | 0.5  | nM |
| CHEMBL47465  | C[S+](O-)]c1ccc(C[C@H](C[C@H](O)[C@H](Cc2ccccc2)NC(=O)OC(C)(C)C)C(=O)N[C@@H]3[C@H](O)Cc4ccccc34)cc1                                  | 0.51 | nM |
| CHEMBL207077 | CC(C)CN([C@H](CO)CCCCNC(=O)[C@@H](NC(=O)N1CCOCC1)C(c2ccccc2)c3ccccc3)S(=O)(=O)c4ccc(N)cc4                                            | 0.51 | nM |
| CHEMBL380545 | CC(C)CN([C@H](CO)CCCCNC(=O)[C@@H](NC(=O)N1CCNCC1)C(c2ccccc2)c3ccccc3)S(=O)(=O)c4ccc(N)cc4                                            | 0.52 | nM |
| CHEMBL54182  | Cc1ccccc1CNC(=O)[C@H]2N(C[C@@H](O)C[C@@H](Cc3ccccc3)C(=O)N[C@@H]4[C@H](O)COc5ccccc45)CSC2(C)C                                        | 0.52 | nM |
| CHEMBL438249 | CC(C)CN([C@H](CO)CCCCNC(=O)[C@@H](NC(=O)c1ccc(O)cc1)C(c2ccccc2)c3ccccc3)S(=O)(=O)c4ccc(N)cc4                                         | 0.53 | nM |
| CHEMBL326493 | CC(C)(C)NC(=O)[C@@H]1CN(Cc2ccccc2S)CCN1C[C@@H](O)C[C@@H](Cc3ccccc3)C(=O)NC4[C@H](O)Cc5ccccc45                                        | 0.54 | nM |
| CHEMBL285759 | CC(C)[C@]1(CCc2ccc(N)cc2)CC(=O)C(=C(O)O1)Sc3cc(C)c(CO)cc3C(C)(C)C                                                                    | 0.54 | nM |
| CHEMBL324881 | CC1(C)S[C@@H](N[C@H]1C(=O)NCCNC(=O)[C@@H]2N[C@H](SC2(C)C)[C@H](NC(=O)Cc3ccccc3)C(=O)NCc4ccccc4)[C@H](NC(=O)Cc5ccccc5)C(=O)NCc6ccccc6 | 0.55 | nM |
| CHEMBL378194 | CC(C)CN([C@H](CO)CCCCNC(=O)[C@@H](NC(=O)c1ccc(O)c(c1)[N+](=O)[O-])C(c2ccccc2)c3ccccc3)S(=O)(=O)c4ccc(N)cc4                           | 0.56 | nM |
| CHEMBL76040  | CC(C)C1(CCc2nccs2)CC(=O)C(=C(O)O1)Sc3cc(C)c(CO)cc3C(C)(C)C                                                                           | 0.57 | nM |
| CHEMBL77041  | CC(C)C1(CCc2ccc(CO)s2)CC(=O)C(=C(O)O1)Sc3cc(C)c(CO)cc3C(C)(C)C                                                                       | 0.58 | nM |
| CHEMBL301260 | CC(C)[C@@H]1[C@@H](CCS1(=O)=O)OC(=O)N[C@@H](Cc2ccccc2)[C@H](O)CN3CCN(CCc4ccccc4)C[C@H]3C(=O)NC(C)(C)C                                | 0.59 | nM |
| CHEMBL299821 | COCCN(CCCc1ccc(C[C@H](C[C@H](O)[C@H](Cc2ccccc2)NC(=O)OC(C)(C)C)C(=O)N[C@@H]3[C@H](O)Cc4ccccc34)cc1)CCOC                              | 0.59 | nM |
| CHEMBL317793 | CC(C)(C)NC(=O)[C@@H]1C[C@@H]2CCCC[C@@H]2CN1C[C@@H](O)[C@H](Cc3ccccc3)NC(=O)[C@@H](C[S+](O-)]c4ccc(F)cc4)NS(=O)(=O)C                  | 0.6  | nM |
| CHEMBL81811  | CC(C)(N1CCN(C[C@@H](O)C[C@@H](Cc2ccccc2)C(=O)N[C@@H]3[C@H](O)COc4ccccc34)[C@@H](C1)C(=O)NC5CC5)c6oc7ccncc7c6                         | 0.6  | nM |
| CHEMBL52868  | CC(C)C[C@H](NC(=O)[C@@H](C[C@H](O)[C@@H](CC(=O)OC(C)(C)C)Cc1ccccc1)Cc2ccccc2)C(=O)N[C@@H](Cc3ccccc3)C(=O)N                           | 0.6  | nM |
| CHEMBL262300 | CC(C)C[C@H](NC(=O)[C@@H](C[C@H](O)[C@H](Cc1ccccc1)NC(=O)OC(C)(C)C)Cc2ccccc2)C(=O)NC(=O)C(N)Cc3ccccc3                                 | 0.6  | nM |
| CHEMBL323814 | O[C@@H]1[C@@H](O)[C@@H](OCc2ccccc2)[C@@H](Cc3ccccc3)S(=O)(=O)[C@H](Cc4ccccc4)[C@@H]1OCc5ccccc5                                       | 0.6  | nM |
| CHEMBL57566  | CC(C)[C@@H]1[C@@H](CCS1(=O)=O)OC(=O)N[C@@H](Cc2ccccc2)[C@H](O)CN3CCN(Cc4ccccc4)C[C@H]3C(=O)NC(C)(C)C                                 | 0.6  | nM |
| CHEMBL416814 | CN(C)CCCc1ccc(C[C@H](C[C@H](O)[C@H](Cc2ccccc2)NC(=O)OC(C)(C)C)C(=O)N[C@@H]3[C@H](O)Cc4ccccc34)cc1                                    | 0.6  | nM |
| CHEMBL311514 | CCNC(=O)[C@@H]1CN(CCN1C[C@@H](O)C[C@@H](Cc2ccccc2)C(=O)N[C@@H]3[C@H](O)COc4ccccc34)C(C)(C)c5oc6ccncc6c5                              | 0.61 | nM |
| CHEMBL333607 | Cc1ccc(CN2CCN(C[C@@H](O)C[C@@H](Cc3ccccc3)C(=O)NC4[C@H](O)Cc5ccccc45)[C@@H](C2)C(=O)NC(C)(C)C)en1                                    | 0.62 | nM |
| CHEMBL77281  | CC(C)[C@H](NC(=O)[C@@H](C[C@H](O)[C@H](Cc1ccccc1)NC(=O)OC(C)(C)C)Cc2ccccc2)C(=O)NCc3ccncc3                                           | 0.62 | nM |
| CHEMBL384211 | CC(C)CN([C@H](CO)CCCCNC(=O)[C@@H](NC(=O)c1ccccc1O)C(c2ccccc2)c3ccccc3)S(=O)(=O)c4ccc(N)cc4                                           | 0.63 | nM |
| CHEMBL316717 | CC(C)[C@H]1[C@H](CCS1(=O)=O)OC(=O)N[C@@H](CS2ccccc2)[C@H](O)CN3C[C@H]4CCS[C@H]4C[C@H]3C(=O)NC(C)(C)C                                 | 0.63 | nM |
| CHEMBL208724 | CC(C)CN([C@H](CO)CCCCNC(=O)[C@@H](NC(=O)c1ccncc1)C(c2                                                                                | 0.65 | nM |

|               |                                                                                                                                                                    |      |    |
|---------------|--------------------------------------------------------------------------------------------------------------------------------------------------------------------|------|----|
| CHEMBL78514   | <chem>cccc2)c3cccc3)S(=O)(=O)c4ccc(N)cc4<br/>CC(C)(N1CCN(C[C@@H](O)C[C@@H](Cc2cccc2)C(=O)N[C@@H]3[C@@H](O)COc4cccc34)[C@@H](C1)C(=O)NCc5cccs5)c6oc7ccncc7c6</chem> | 0.65 | nM |
| CHEMBL261952  | <chem>CC(C)CN([C@@H](CO)CCCCNC(=O)[C@@H](NC(=O)c1ccnc1)C(c2cccc2)c3cccc3)S(=O)(=O)c4ccc(N)cc4</chem>                                                               | 0.68 | nM |
| CHEMBL325946  | <chem>CC(C)(C)NC(=O)[C@@H]1CN(Cc2cnc3OCCc3c2)CCN1C[C@@H](O)C[C@@H](Cc4cccc4)C(=O)NC5[C@@H](O)Cc6cccc56</chem>                                                      | 0.68 | nM |
| CHEMBL327564  | <chem>CC(C)[C@@H](NC(=O)[C@@H](C[C@@H](O)[C@@H](Cc1cccc1)NC(=O)OC(C)(C)Cc2cccc2)C(=O)NCc3ccnc3</chem>                                                              | 0.69 | nM |
| CHEMBL75082   | <chem>CC(C)[C@@H](NC(=O)c1ccc2cccc2n1)C(=O)N[C@@H](Cc3cccc3)[C@@H](O)CN4C[C@@H]5CCCC[C@@H]5C[C@@H]4C(=O)NC(C)(C)C</chem>                                           | 0.7  | nM |
| CHEMBL282654  | <chem>CCC(C)C(NC(=O)[C@@H](C[C@@H](O)[C@@H](Cc1cccc1)NC(=O)OC(C)(C)Cc2cccc2)C(=O)NCc3cccc3</chem>                                                                  | 0.71 | nM |
| CHEMBL263423  | <chem>CC(C)(C)NC(=O)[C@@H]1C[C@@H]2SCC[C@@H]2CN1C[C@@H](O)[C@@H](Cc3cccc3)NC(=O)[C@@H](CS(=O)(=O)c4cccc5ccnc45)NS(=O)(=O)C</chem>                                  | 0.71 | nM |
| CHEMBL308615  | <chem>CC(C)C1(CCc2c[nH]c3cccc23)CC(=O)C(=C(O)O1)Sc4cc(C)c(CO)cc4C(C)(C)C</chem>                                                                                    | 0.72 | nM |
| CHEMBL327565  | <chem>CC(C)[C@@H](NC(=O)[C@@H](C[C@@H](O)[C@@H](Cc1cccc1)NC(=O)OC(C)(C)Cc2cccc2)C(=O)NCc3cccn3</chem>                                                              | 0.75 | nM |
| CHEMBL115     | <chem>CC(C)(C)NC(=O)[C@@H]1CN(Cc2ccnc2)CCN1C[C@@H](O)C[C@@H](Cc3cccc3)C(=O)N[C@@H]4[C@@H](O)Cc5cccc45</chem>                                                       | 0.76 | nM |
| CHEMBL301193  | <chem>CCc1ccc(CCN2CCN(C[C@@H](O)[C@@H](Cc3cccc3)NC(=O)O[C@@H]4CCS(=O)(=O)[C@@H]4C(C)C)[C@@H](C2)C(=O)NC(C)(C)Cs1</chem>                                            | 0.76 | nM |
| CHEMBL276656  | <chem>CC(C)(C)NC(=O)c1cccc1C[C@@H](O)[C@@H](Cc2cccc2)NC(=O)[C@@H](CS(=O)(=O)c3ccc(F)cc3)NS(=O)(=O)C</chem>                                                         | 0.77 | nM |
| CHEMBL311555  | <chem>CC(C)C1(CCc2occc2)CC(=O)C(=C(O)O1)Sc3cc(C)c(CO)cc3C(C)(C)C</chem>                                                                                            | 0.78 | nM |
| CHEMBL73875   | <chem>CCCC[C@@H](CN[C@@H](CCCC)C(=O)N[C@@H](CCC(=O)N)C(=O)N[C@@H](CCCN=C(N)N)C(=O)N)NC(=O)[C@@H](NC(=O)[C@@H](NC(=O)C)[C@@H](C)O)[C@@H](C)CC</chem>                | 0.78 | nM |
| CHEMBL2374440 | <chem>COC(=O)N[C@@H](Cc1cccc1c2cccc2)C(=O)NCCCC[C@@H](CO)N(CC(C)C)S(=O)(=O)c3ccc(N)cc3</chem>                                                                      | 0.79 | nM |
| CHEMBL75070   | <chem>CC(C)c1nsc1CCC2(CC(=O)C(=C(O)O2)Sc3cc(C)c(CO)cc3C(C)(C)C)C(C)C</chem>                                                                                        | 0.8  | nM |
| CHEMBL115176  | <chem>CC(C)(C)NC(=O)[C@@H]1CN(CC(=O)OC(C)(C)CCN1C[C@@H](O)C[C@@H](Cc2cccc2)C(=O)NC3[C@@H](O)Cc4cccc34</chem>                                                       | 0.81 | nM |
| CHEMBL100271  | <chem>CC(C)[C@@H]1SCC[C@@H]1OC(=O)N[C@@H](Cc2cccc2)[C@@H](O)CN3C[C@@H]4CCS[C@@H]4C[C@@H]3C(=O)NC(C)(C)C</chem>                                                     | 0.82 | nM |
| CHEMBL97825   | <chem>CCC(C)[C@@H](NC(=O)[C@@H](C[C@@H](O)[C@@H](Cc1cccc1)NC(=O)OC(C)(C)Cc2cccc2)C(=O)NCc3ncc[nH]3</chem>                                                          | 0.88 | nM |
| CHEMBL95116   | <chem>CC(C)[C@@H](NC(=O)[C@@H](C[C@@H](O)[C@@H](Cc1cccc1)NC(=O)OC(C)(C)Cc2cccc2)C(=O)NCC(O)CN3CCOCC3</chem>                                                        | 0.88 | nM |
| CHEMBL295482  | <chem>COCCN(CCOC)CCOc1ccc(C[C@@H](C[C@@H](O)[C@@H](Cc2cccc2)NC(=O)OC(C)(C)C)C(=O)NC3[C@@H](O)Cc4cccc34)cc1</chem>                                                  | 0.9  | nM |
| CHEMBL102664  | <chem>CC1(C)S[C@@H](N[C@@H]1C(=O)NCCNC(=O)[C@@H]2N[C@@H](SC2(C)C)[C@@H](NC(=O)Cc3cccc3)C(=O)NCc4cccc4)[C@@H](NC(=O)Cc5cccc5)C(=O)NCc6cccc6</chem>                  | 0.9  | nM |
| CHEMBL98355   | <chem>CC(C)(C)OC(=O)N[C@@H](Cc1cccc1)[C@@H](O)C[C@@H](Cc2cccc2)C(=O)N[C@@H](C(=O)N)c3cccc3</chem>                                                                  | 0.9  | nM |
| CHEMBL72386   | <chem>CC(C)[C@@H](NC(=O)c1ccc2cccc2c1)C(=O)N[C@@H](Cc3cccc3)[C@@H](O)CN4CC5CCCCC5C[C@@H]4C(=O)NC(C)(C)C</chem>                                                     | 0.9  | nM |
| CHEMBL209878  | <chem>CC(C)CN([C@@H](CO)CCCCNC(=O)[C@@H](NC(=O)c1nccc1O)C(c2cccc2)c3cccc3)S(=O)(=O)c4ccc(N)cc4</chem>                                                              | 0.9  | nM |
| CHEMBL433072  | <chem>[I-].CC(C)(C)OC(=O)N[C@@H](Cc1cccc1)[C@@H](O)C[C@@H](Cc</chem>                                                                                               | 0.91 | nM |

|              |                                                                                                                                                            |      |    |
|--------------|------------------------------------------------------------------------------------------------------------------------------------------------------------|------|----|
| CHEMBL99336  | 2ccc(CCC[N+](C)(C)C)cc2C(=O)N[C@@H]3[C@H](O)Cc4ccccc34<br>C[C@@H]1OCC[C@@H]1OC(=O)N[C@@H](CSc2ccccc2)[C@H](O)<br>)CN3C[C@H]4CCS[C@H]4C[C@H]3C(=O)NC(C)(C)C | 0.92 | nM |
| CHEMBL262714 | CC(C)(C)NC(=O)c1ccccc1C[C@@H](O)[C@H](Cc2ccccc2)NC(=O)[C@H](CS(=O)(=O)c3ccc4ccccc4n3)NS(=O)(=O)C                                                           | 0.92 | nM |
| CHEMBL45457  | CC(C)(C)OC(=O)N[C@@H](Cc1ccc(OCCN2CCOCC2)cc1)[C@@H](O)C[C@@H](Cc3ccccc3)C(=O)NC4[C@H](O)Cc5ccccc45                                                         | 0.92 | nM |
| CHEMBL74508  | CC(C)C1(CCc2ccnc2)CC(=O)C(=C(O)O1)Sc3cc(C)c(CO)cc3C(C)(C)C                                                                                                 | 0.94 | nM |
| CHEMBL151080 | CC(C)(C)NC(=O)[C@@H]1CN(Cc2oc3ccc(F)cc3c2)CCN1C[C@@H](O)C[C@@H](Cc4ccccc4)C(=O)NC5[C@H](O)Cc6ccccc56                                                       | 0.94 | nM |
| CHEMBL72497  | CCCCc1cc(CN2CCN(C[C@@H](O)[C@H](Cc3ccccc3)NC(=O)O[C@@H]4CCS(=O)(=O)[C@@H]4C(C)C)[C@@H](C2)C(=O)NC(C)(C)C)cc(CCC)n1                                         | 0.95 | nM |
| CHEMBL78327  | CC(C)C1(CCc2csc(N)n2)CC(=O)C(=C(O)O1)Sc3cc(C)c(CO)cc3C(C)(C)C                                                                                              | 0.95 | nM |
| CHEMBL306932 | CC(C)C1(CCc2ccc3[nH]ccc3c2)CC(=O)C(=C(O)O1)Sc4cc(C)c(CO)cc4C(C)(C)C                                                                                        | 0.98 | nM |
| CHEMBL46062  | CN(C)CCOc1ccc(C[C@H](C[C@H](O)[C@H](Cc2ccccc2)NC(=O)OC(C)(C)C)C(=O)NC3[C@H](O)Cc4ccccc34)cc1                                                               | 1    | nM |
| CHEMBL432806 | CC(C)[C@@H](NC(=O)N(C)Cc1nccc1)C(=O)N[C@@H](Cc2ccccc2)[C@H](O)[C@H](O)[C@H](Cc3ccccc3)NC(=O)[C@@H](NC(=O)N(C)Cc4nccc4)C(C)C                                | 1    | nM |
| CHEMBL116    | CC(C)CN(C[C@@H](O)[C@H](Cc1ccccc1)NC(=O)O[C@H]2CCOC2)S(=O)(=O)c3ccc(N)cc3                                                                                  | 1    | nM |
| CHEMBL307582 | CC(C)C1(CCc2ccc(N)cc2)CC(=O)C(=C(O)O1)Sc3cc(C)c(OS(=O)(=O)N4CCN(C)CC4)cc3C(C)(C)C                                                                          | 1    | nM |
| CHEMBL324071 | Nc1cccc(CO[C@@H]2[C@H](O)[C@@H](O)[C@@H](OCc3ccccc(N)c3)[C@@H](Cc4ccccc4)S(=O)(=O)[C@@H]2Cc5ccccc5)c1                                                      | 1    | nM |
| CHEMBL45928  | CC(C)(C)OC(=O)N[C@@H](Cc1ccccc1)[C@@H](O)C[C@@H](Cc2ccc(CCCN3CCSCC3)cc2)C(=O)N[C@@H]4[C@H](O)Cc5ccccc45                                                    | 1    | nM |
| CHEMBL324260 | CC(C)(C)NC(=O)[C@@H]1CN(CCOc2ccccc2)CCN1C[C@@H](O)C[C@@H](Cc3ccccc3)C(=O)NC4[C@H](O)Cc5ccccc45                                                             | 1.03 | nM |
| CHEMBL95419  | CC(C)[C@H](NC(=O)[C@@H](C[C@H](O)[C@H](Cc1ccccc1)NC(=O)OC(C)(C)C)Cc2ccccc2)C(=O)N                                                                          | 1.1  | nM |
| CHEMBL72399  | CCCc1cc(CN2CCN(C[C@@H](O)[C@H](Cc3ccccc3)NC(=O)O[C@@H]4CCS(=O)(=O)[C@@H]4C(C)C)[C@@H](C2)C(=O)NC(C)(C)C)ccn1                                               | 1.1  | nM |
| CHEMBL163045 | CC(C)(C)NC(=O)c1ccccc1C[C@@H](O)[C@H](CSc2ccccc2)NC(=O)[C@H](CC(=O)N)NC(=O)c3ccc4ccccc4n3                                                                  | 1.1  | nM |
| CHEMBL337283 | CC(C)(C)NC(=O)[C@@H]1CCCN1C(=O)[C@@H](O)[C@H](Cc2ccc(cc2)NC(=O)[C@H](CC(=O)N)NC(=O)c3ccc4ccccc4n3                                                          | 1.1  | nM |
| CHEMBL277579 | CC(C)[C@H](NC(=O)[C@H](Cc1ccccc1)CS(=O)(=O)C(C)(C)C)C(=O)NCP(=O)(O)CNC(=O)[C@@H](NC(=O)[C@H](Cc3cccc4ccccc34)CS(=O)(=O)C(C)(C)C)C(C)C                      | 1.1  | nM |
| CHEMBL323882 | COc1ncccc1CN2CCN(C[C@@H](O)C[C@@H](Cc3ccccc3)C(=O)NC4[C@H](O)Cc5ccccc45)[C@@H](C2)C(=O)NC(C)(C)C                                                           | 1.1  | nM |
| CHEMBL352273 | CC(=O)N[C@@H](CC(=O)N)C(=O)N[C@@H](CSc1ccc2ccccc2c1)[C@H](O)Cc3ccccc3C(=O)NC(C)(C)C                                                                        | 1.1  | nM |
| CHEMBL98228  | COC(=O)[C@@H](NC(=O)[C@@H](C[C@H](O)[Si](C)(C)C(C)(C)C)[C@H](Cc1ccccc1)NC(=O)OC(C)(C)C)Cc2ccccc2)C(C)C                                                     | 1.1  | nM |
| CHEMBL37383  | CC(C)(C)NC(=O)[C@@H]1CN(Cc2ccc(Cl)c(Cl)c2)CCN1C[C@@H](O)C[C@@H](Cc3ccccc3)C(=O)N[C@@H]4[C@H](O)Cc5ccccc45                                                  | 1.1  | nM |
| CHEMBL295777 | CC(C)(C)OC(=O)N[C@@H](Cc1ccccc1)[C@@H](O)C[C@@H](Cc2ccc(CN3CCOCC3)cc2)C(=O)N[C@@H]4[C@H](O)Cc5ccccc45                                                      | 1.15 | nM |
| CHEMBL310459 | CC(C)(C)CNC(=O)[C@@H]1CN(CCN1C[C@@H](O)C[C@@H](Cc2ccccc2)C(=O)N[C@@H]3[C@H](O)COc4ccccc34)C(C)(C)c5oc6cncnc5                                               | 1.16 | nM |



6c5

|               |                                                                                                                      |      |    |
|---------------|----------------------------------------------------------------------------------------------------------------------|------|----|
| CHEMBL311979  | CC(C)(C)NC(=O)[C@@H]1CN(CCN1C[C@@H](O)C[C@@H](Cc2cccc2)C(=O)N[C@@H]3[C@H](O)Cc4cccc34)C(C)(C)c5cccnc5                | 1.16 | nM |
| CHEMBL359236  | CC(C)(C)NC(=O)[C@@H]1CN(Cc2noc3cccc23)CCN1C[C@@H](O)C[C@@H](Cc4cccc4)C(=O)NC5[C@H](O)Cc6cccc56                       | 1.17 | nM |
| CHEMBL346120  | CC(C)c1nc(CN(C)C(=O)NCCC(=O)N[C@@H](Cc2cccc2)[C@@H](O)C[C@H](Cc3cccc3)NC(=O)OCc4cncs4)cs1                            | 1.2  | nM |
| CHEMBL71153   | CNS(=O)(=O)Oc1cc(c(SC2=C(O)OC(CCc3ccc(O)cc3)(CC2=O)C(C)C)cc1C)C(C)(C)C                                               | 1.2  | nM |
| CHEMBL2374439 | COC(=O)N[C@H](Cc1ccc2cccc2c1)C(=O)NCCCC[C@@H](CO)N(C(C)C)S(=O)(=O)c3ccc(N)cc3                                        | 1.2  | nM |
| CHEMBL371085  | COc1cc(CN2[C@H](Cc3cccc3)[C@H](O)CN(N(Cc4ccc(O)c(OC)c4)C2=O)C(=O)CCc5cncnc5)ccc1O                                    | 1.2  | nM |
| CHEMBL359237  | CC(C)(C)NC(=O)[C@@H]1CN(Cc2nc3cccc3s2)CCN1C[C@@H](O)C[C@@H](Cc4cccc4)C(=O)NC5[C@H](O)Cc6cccc56                       | 1.2  | nM |
| CHEMBL406991  | CC(C)(C)NC(=O)c1cccc1C[C@@H](O)[C@H](Cc2cccc2)NC(=O)[C@H](CSc3cccc4cccc34)NS(=O)(=O)C                                | 1.2  | nM |
| CHEMBL320126  | CC(C)[C@@H](NC(=O)c1cc2cccc2[nH]1)C(=O)N[C@@H](Cc3cccc3)C(O)[C@H](Cc4cccc4)NC(=O)[C@@H](NC(=O)c5cc6cccc6[nH]5)C(C)C  | 1.2  | nM |
| CHEMBL75118   | CC(C)C1(CCc2cccn2)CC(=O)C(=C(O)O1)Sc3cc(C)c(CO)cc3C(C)(C)C                                                           | 1.2  | nM |
| CHEMBL307966  | CCC(C)c1cc(CN2CCN(C[C@@H](O)[C@H](Cc3cccc3)NC(=O)O[C@@H]4CCS(=O)(=O)[C@@H]4C(C)C)[C@@H](C2)C(=O)NC(C)(C)C)ccn1       | 1.2  | nM |
| CHEMBL154831  | CCCN(Cc1csc(n1)C(C)C)C(=O)NCC(=O)N[C@H](C[C@H](O)[C@H](Cc2cccc2)NC(=O)OCc3cncs3)Cc4cccc4                             | 1.2  | nM |
| CHEMBL431455  | CC(=O)N[C@H](CS(=O)(=O)c1ccc(F)cc1)C(=O)N[C@@H](Cc2cccc2)[C@H](O)CN3C[C@H]4CCS[C@H]4C[C@H]3C(=O)NC(C)(C)C            | 1.2  | nM |
| CHEMBL295345  | CC(C)C[C@H](NC(=O)[C@@H](C[C@H](O)[C@H](Cc1cccc1)NC(=O)OC(C)(C)C)Cc2cccc3cccc23)C(=O)N[C@@H](Cc4cccc4)C(=O)N         | 1.2  | nM |
| CHEMBL147227  | CC(C)(C)NC(=O)[C@@H]1CN(Cc2oc3cccc3n2)CCN1C[C@@H](O)C[C@@H](Cc4cccc4)C(=O)NC5[C@H](O)Cc6cccc56                       | 1.2  | nM |
| CHEMBL98885   | O[C@@H](C[C@@H](Cc1cccc1)C(=O)N[C@@H]2[C@H](O)Cc3cccc23)[C@H](Cc4cccc4)NC(=O)OC5CCOCC5                               | 1.22 | nM |
| CHEMBL306073  | CC(C)C1(CCc2ccsc2)CC(=O)C(=C(O)O1)Sc3cc(C)c(CO)cc3C(C)(C)C                                                           | 1.22 | nM |
| CHEMBL94991   | CCC(C)[C@H](NC(=O)[C@@H](C[C@H](O)[C@H](Cc1cccc1)NC(=O)OC(C)(C)C)Cc2cccc2)C(=O)NCc3cccn3                             | 1.3  | nM |
| CHEMBL168525  | CC(C)C1(CCc2ccc(N)cc2)CC(=O)C(=C(O)O1)Sc3cc(C)c(OS(=O)(=O)c4ccc(cc4)C#N)cc3C(C)(C)C                                  | 1.3  | nM |
| CHEMBL53107   | CC(C)C[C@]1(N=CC(=C1O)[C@@H](Cc2cccc2)C(=O)N)C3=C(O)[C@@](C[C@H](O)[C@@H](CC(=O)OC4CCOC4)Cc5cccc5)(Cc6cccc6)N=C3     | 1.3  | nM |
| CHEMBL77498   | CC(C)C1(CCc2csen2)CC(=O)C(=C(O)O1)Sc3cc(C)c(CO)cc3C(C)(C)C                                                           | 1.3  | nM |
| CHEMBL78209   | CC(C)C1(CCc2nsc2C)CC(=O)C(=C(O)O1)Sc3cc(C)c(CO)cc3C(C)(C)C                                                           | 1.3  | nM |
| CHEMBL304805  | CC(C)C[C@]1(N=CC(=C1O)[C@@H](Cc2cccc2)C(=O)N)C3=C(O)[C@@](C[C@H](O)[C@H](Cc4cccc4)NC(=O)O[C@@H]5CCOC5)(Cc6cccc6)N=C3 | 1.3  | nM |
| CHEMBL90751   | O[C@@H](C[C@H](Cc1cccc1)NC(=O)c2ccc(O)cc2Cl)[C@H](Cc3cccc3)NC(=O)OCc4cccc4                                           | 1.3  | nM |
| CHEMBL46061   | CN(C)Cc1ccc(C[C@H](C[C@H](O)[C@H](Cc2cccc2)NC(=O)OC(C)(C)C)C(=O)N[C@@H]3[C@H](O)Cc4cccc34)cc1                        | 1.4  | nM |
| CHEMBL333906  | Cc1cc(SC2=C(O)OC(CCc3cccc3)(CC2=O)c4ccc(OCCO)cc4)c(cc1CO)C(C)(C)C                                                    | 1.4  | nM |
| CHEMBL307091  | CC(C)[C@@H]1[C@@H](CCS1(=O)=O)OC(=O)N[C@@H](Cc2cccc                                                                  | 1.4  | nM |

|              |                                                                                                                                                           |      |    |
|--------------|-----------------------------------------------------------------------------------------------------------------------------------------------------------|------|----|
| CHEMBL93589  | <chem>c2)[C@H](O)CN3CCN(Cc4ccnc(C)c4)C[C@H]3C(=O)NC(C)(C)C<br/>CC(C)(C)OC(=O)N[C@H](C[C@H](O)[C@H](Cc1ccccc1)NC(=O)c2c<br/>cc(O)cc2Cl)Cc3ccccc3</chem>    | 1.4  | nM |
| CHEMBL320322 | <chem>CC(C)[C@@H](NC(=O)N1CCN(CC1)c2ccccc2)C(=O)N[C@@H](Cc3<br/>ccccc3)[C@H](O)[C@H](O)[C@H](Cc4ccccc4)NC(=O)[C@@H](NC(=O)N5CCN(CC5)c6ccccc6)C(C)C</chem> | 1.4  | nM |
| CHEMBL282041 | <chem>CC(C)CC(NC(=O)[C@@H](C[C@H](O)[C@H](Cc1ccccc1)NC(=O)O<br/>C(C)(C)C)Cc2ccccc2)C(=O)NCc3ccccc3</chem>                                                 | 1.4  | nM |
| CHEMBL327599 | <chem>CC(C)(C)NC(=O)[C@@H]1CCCC[C@H]1C[C@@H](O)[C@H](Cc2c<br/>cccc2)NC(=O)[C@H](CC(=O)N)NC(=O)c3ccc4ccccc4n3</chem>                                       | 1.4  | nM |
| CHEMBL308786 | <chem>CC(C)C1(CCc2nc3ccccc3s2)CC(=O)C(=C(O)O1)Sc4cc(C)c(CO)cc4C(<br/>C)(C)C</chem>                                                                        | 1.4  | nM |
| CHEMBL306570 | <chem>CC(C)(C)NC(=O)[C@@H]1C[C@@H]2CCCC[C@@H]2CN1C[C@@<br/>H](O)[C@H](Cc3ccccc3)NC(=O)[C@@H](NC(=O)c4ccc5ccccc5n4)[C<br/>@H]6CCSC6</chem>                 | 1.41 | nM |
| CHEMBL318129 | <chem>C[C@H]1[C@@H](CCS1(=O)=O)OC(=O)N[C@@H](CS2ccccc2)[C<br/>@H](O)CN3C[C@H]4CCS[C@H]4C[C@H]3C(=O)NC(C)(C)C</chem>                                       | 1.44 | nM |
| CHEMBL351726 | <chem>CC(C)CCN(C[C@@H](O)[C@H](Cc1ccccc1)NC(=O)[C@H](CC(=O)<br/>N)NC(=O)c2ccc3ccccc3n2)S(=O)(=O)c4ccccc4</chem>                                           | 1.5  | nM |
| CHEMBL275969 | <chem>Cc1cc(S[C@@H]2CCN(C[C@@H](O)[C@H](Cc3ccccc3)NC(=O)COc<br/>4c(C)cccc4C)[C@@H](C2)C(=O)NC(C)(C)C)nc(C)n1</chem>                                       | 1.5  | nM |
| CHEMBL433704 | <chem>CC(C)(C)NC(=O)[C@@H]1C[C@@H]2CCCC[C@@H]2CN1C[C@@<br/>H](O)[C@H](CSc3ccccc3)NC(=O)[C@H](CC(=O)N)NC(=O)c4ccc5cc<br/>ccc5n4</chem>                     | 1.5  | nM |
| CHEMBL164158 | <chem>CC(C)(C)NC(=O)c1ccccc1C[C@@H](O)[C@H](CSc2ccc3ccccc3c2)N<br/>C(=O)[C@H](CC(=O)N)NC(=O)OCc4ccccc4</chem>                                             | 1.5  | nM |
| CHEMBL97299  | <chem>CC(C)C[C@H](NC(=O)[C@@H](C[C@H](O)[C@H](Cc1ccccc1)NC(=O)OC(C)(C)C)Cc2ccccc2)C(=O)NC(CO)Cc3ccccc3</chem>                                             | 1.5  | nM |
| CHEMBL308410 | <chem>CCc1cc(CN2CCN(C[C@@H](O)[C@H](Cc3ccccc3)NC(=O)O[C@@<br/>H]4CCS(=O)(=O)[C@@H]4C(C)C)[C@@H](C2)C(=O)NC(C)(C)C)cc<br/>n1</chem>                        | 1.5  | nM |
| CHEMBL168270 | <chem>Cc1cc(SC2=C(O)OC(C)(CCc3ccc(O)cc3)CC2=O)c(cc1NS(=O)(=O)c4c<br/>cccc4)C(C)(C)C</chem>                                                                | 1.5  | nM |
| CHEMBL208907 | <chem>CC(C)CN([C@H](CO)CCCCNC(=O)[C@@H](NC(=O)C)C(c1ccccc1)<br/>c2ccccc2)S(=O)(=O)c3ccc(N)cc3</chem>                                                      | 1.5  | nM |
| CHEMBL306534 | <chem>CC(C)C1(CCc2ccncc2)CC(=O)C(=C(O)O1)Sc3cc(C)c(CO)cc3C(C)(C)<br/>C</chem>                                                                             | 1.5  | nM |
| CHEMBL324916 | <chem>CC(C)[C@@H](NC(=O)CCc1ccnc1)C(=O)N[C@@H](Cc2ccccc2)[C<br/>@H](O)[C@H](O)[C@H](Cc3ccccc3)NC(=O)[C@@H](NC(=O)CCc4<br/>ccnc4)C(C)C</chem>              | 1.5  | nM |
| CHEMBL351145 | <chem>CC(C)C(NC(=O)N(C)Cc1esc(n1)C(C)C)C(=O)N[C@@H](Cc2ccccc2)[<br/>C@@H](O)C[C@H](Cc3ccccc3)NC(=O)OCc4enc(s4)C(C)C</chem>                                | 1.5  | nM |
| CHEMBL81974  | <chem>CC(C)(N1CCN(C[C@@H](O)C[C@@H](Cc2ccccc2)C(=O)N[C@@H<br/>]3[C@H](O)COc4ccccc34)[C@@H](C1)C(=O)NCCC(F)(F)F)c5oc6ccn<br/>cc6c5</chem>                  | 1.6  | nM |
| CHEMBL57238  | <chem>CC(C)[C@@H]1[C@@H](CCS1(=O)=O)OC(=O)N[C@@H](Cc2ccccc<br/>c2)[C@H](O)CN3CCN(CCc4ccsc4)C[C@H]3C(=O)NC(C)(C)C</chem>                                   | 1.6  | nM |
| CHEMBL291203 | <chem>CC(C)(C)OC(=O)N[C@@H](Cc1ccccc1)[C@@H](O)C[C@@H](Cc2c<br/>cc(OCCN3CCCCC3)cc2)C(=O)NC4[C@H](O)Cc5ccccc45</chem>                                      | 1.6  | nM |
| CHEMBL267571 | <chem>Cc1cccc(C)c1OCC(=O)N[C@@H](Cc2ccccc2)[C@H](O)CN3CC[C@<br/>H](C[C@H]3C(=O)NC(C)(C)C)Sc4ccncc4</chem>                                                 | 1.6  | nM |
| CHEMBL432101 | <chem>CC(C)(C)NC(=O)[C@@H]1CN(CCN1C[C@@H](O)C[C@@H](Cc2c<br/>cccc2)C(=O)N[C@@H]3[C@H](O)Cc4ccccc34)S(=O)(=O)C</chem>                                      | 1.6  | nM |
| CHEMBL324747 | <chem>CC(C)[C@@H](NC(=O)c1ccc2ccccc2n1)C(=O)N[C@@H](Cc3ccccc3)<br/>C(O)[C@H](Cc4ccccc4)NC(=O)[C@@H](NC(=O)c5ccc6ccccc6n5)C(<br/>C)C</chem>                | 1.6  | nM |
| CHEMBL432784 | <chem>CC(=O)N[C@H](CS(=O)(=O)c1ccc2ccccc2c1)C(=O)N[C@@H](Cc3cc</chem>                                                                                     | 1.6  | nM |

|              |                                                                                                                                                       |      |    |
|--------------|-------------------------------------------------------------------------------------------------------------------------------------------------------|------|----|
| CHEMBL74787  | <chem>ccc3)[C@H](O)CN4C[C@H]5CCCC[C@H]5C[C@H]4C(=O)NC(C)(C)C</chem><br><chem>CC(C)c1nc(CCC2(CC(=O)C(=C(O)O2)Sc3cc(C)c(CO)cc3C(C)(C)C)C(C)C)cs1</chem> | 1.6  | nM |
| CHEMBL331363 | <chem>CC(C)[C@@H](NC(=O)N(C)Cc1ccnc1)C(=O)N[C@@H](Cc2ccccc2)[C@H](O)[C@H](O)[C@H](Cc3ccccc3)NC(=O)[C@@H](NC(=O)N(C)Cc4ccnc4)C(C)C</chem>              | 1.6  | nM |
| CHEMBL93718  | <chem>Cc1c(O)cccc1C(=O)N[C@@H](Cc2ccccc2)[C@@H](O)C[C@H](Cc3ccccc3)NC(=O)OC(C)(C)C</chem>                                                             | 1.6  | nM |
| CHEMBL155636 | <chem>CC(C)CN(Cc1esc(n1)C(C)C)C(=O)NCC(=O)N[C@H](C[C@H](O)[C@H](Cc2ccccc2)NC(=O)OCc3cncs3)Cc4ccccc4</chem>                                            | 1.6  | nM |
| CHEMBL70386  | <chem>CN(C)S(=O)(=O)Oc1cc(c(SC2=C(O)OC(C)(CCc3ccc(O)cc3)CC2=O)cc1C)C(C)(C)C</chem>                                                                    | 1.6  | nM |
| CHEMBL112930 | <chem>CC(C)[C@@H](NS(=O)(=O)CCc1cccn1)C(=O)N[C@@H](Cc2ccccc2)[C@@H](O)[C@@H](O)[C@H](Cc3ccccc3)NC(=O)[C@@H](NS(=O)(=O)CCc4cccn4)C(C)C</chem>          | 1.6  | nM |
| CHEMBL113575 | <chem>CC(C)[C@@H](NC(=O)N(C)Cc1cccn1)C(=O)N[C@@H](Cc2ccccc2)[C@H](O)[C@H](O)[C@H](Cc3ccccc3)NC(=O)[C@@H](NC(=O)N(C)Cc4cccn4)C(C)C</chem>              | 1.66 | nM |
| CHEMBL121545 | <chem>Cc1cc(SC2=C(O)OC(CCc3ccc(O)cc3)(CC2=O)c4ccccc4)c(cc1CO)C(C)(C)C</chem>                                                                          | 1.7  | nM |
| CHEMBL317926 | <chem>CC(C)(C)NC(=O)[C@@H]1CN(Cc2ccnc2)CCN1C[C@@H](O)C[C@@H](Cc3ccnc3)C(=O)N[C@@H]4[C@H](O)Cc5ccccc5</chem>                                           | 1.7  | nM |
| CHEMBL13011  | <chem>Cc1cccc(C)c1OCC(=O)N[C@@H](Cc2ccccc2)[C@H](O)CN3CC[C@H](C[C@H]3C(=O)NC(C)(C)C)SCc4ccnc4</chem>                                                  | 1.7  | nM |
| CHEMBL415318 | <chem>CC(=O)N[C@H](CS(=O)(=O)c1cccc2ccnc12)C(=O)N[C@@H](Cc3ccccc3)[C@H](O)CN4C[C@H]5CCCC[C@H]5C[C@H]4C(=O)NC(C)(C)C</chem>                            | 1.7  | nM |
| CHEMBL58043  | <chem>Cc1ccc(C[C@@H](O)C[C@@H](Cc2ccccc2)C(=O)N[C@@H]3[C@H](O)Cc4ccccc34)c(c1)C(=O)NC(C)(C)C</chem>                                                   | 1.7  | nM |
| CHEMBL325395 | <chem>CC(C)(C)NC(=O)C1CN(Cc2c[nH]c3ccccc23)CCN1CC(O)CC(Cc4ccccc4)C(=O)NC5C(O)Cc6ccccc56</chem>                                                        | 1.7  | nM |
| CHEMBL172271 | <chem>CCNS(=O)(=O)Nc1cc(c(SC2=C(O)OC(CCc3ccc(O)cc3)(CC2=O)C(C)C)cc1C)C(C)(C)C</chem>                                                                  | 1.7  | nM |
| CHEMBL116845 | <chem>CC(C)(C)NC(=O)[C@@H]1CN(CCN1C[C@@H](O)C[C@@H](Cc2ccccc2)C(=O)NC3[C@H](O)Cc4ccccc34)C(=O)c5cnc6occcc6c5</chem>                                   | 1.7  | nM |
| CHEMBL332498 | <chem>CC(C)(C)NC(=O)C1CN(Cc2ccc3occcc3e2)CCN1CC(O)CC(Cc4ccccc4)C(=O)NC5C(O)Cc6ccccc56</chem>                                                          | 1.7  | nM |
| CHEMBL313876 | <chem>CC(C)(C)NC(=O)[C@@H]1CN(Cc2ccnc2)CCN1C[C@@H](O)C[C@@H](Cc3ccccc3)C(=O)N[C@@H]4[C@H](O)Cc5ccccc5</chem>                                          | 1.7  | nM |
| CHEMBL95516  | <chem>CNCCNC(=O)[C@@H](NC(=O)[C@@H](C[C@H](O)[C@H](Cc1ccccc1)NC(=O)OC(C)(C)C)Cc2ccccc2)C(C)C</chem>                                                   | 1.73 | nM |
| CHEMBL11050  | <chem>CC(C)(C)NC(=O)c1ccccc1C[C@@H](O)[C@H](Cc2ccccc2)NC(=O)[C@H](CSc3ccc4ccccc4c3)NS(=O)(=O)C</chem>                                                 | 1.8  | nM |
| CHEMBL350861 | <chem>CC(C)c1ccccc1SC2=C(O)OC(CCCCC(=O)O)(CC2=O)c3ccccc3</chem>                                                                                       | 1.8  | nM |
| CHEMBL295609 | <chem>CC(C)(C)OC(=O)N[C@@H](Cc1ccccc1)[C@@H](O)C[C@@H](Cc2ccc(OCCN3CCCC3)cc2)C(=O)NC4[C@H](O)Cc5ccccc5</chem>                                         | 1.8  | nM |
| CHEMBL13217  | <chem>Cc1cccc(C)c1OCC(=O)N[C@@H](Cc2ccccc2)[C@H](O)CN3CC[C@H](C[C@H]3C(=O)NC(C)(C)C)SCc4ccnc4</chem>                                                  | 1.8  | nM |
| CHEMBL20546  | <chem>CC(C)(C)OC(=O)N[C@@H](Cc1ccccc1)[C@@H](O)C[C@@H](Cc2ccccc2)C(=O)NC3[C@H](Cc4ccccc34)C(=O)N</chem>                                               | 1.8  | nM |
| CHEMBL287361 | <chem>CC(C)C1(CCc2ccc(O)cc2)CC(=O)C(=C(O)O1)Sc3cc(C)c(NS(=O)(=O)c4ccccc4)cc3C(C)(C)C</chem>                                                           | 1.8  | nM |
| CHEMBL328205 | <chem>CC(=O)N[C@H](CS(=O)(=O)c1ccc(F)cc1)C(=O)N[C@@H](CSc2ccccc2)[C@H](O)CN3C[C@H]4CCS[C@H]4C[C@H]3C(=O)NC(C)(C)C</chem>                              | 1.8  | nM |
| CHEMBL317160 | <chem>CC(C)(C)NC(=O)[C@@H]1C[C@@H]2SCC[C@@H]2CN1C[C@@H](O)[C@H](CSc3ccccc3)NC(=O)[C@@H](CS(=O)(=O)c4ccc5ccccc5c</chem>                                | 1.8  | nM |

|              |                                                                                                                         |      |    |
|--------------|-------------------------------------------------------------------------------------------------------------------------|------|----|
|              | 4)NC(=O)C(F)(F)F                                                                                                        |      |    |
| CHEMBL72385  | CCc1cc(CN2CCN(C[C@@H](O)[C@H](Cc3ccccc3)NC(=O)O[C@@H]4CCS(=O)(=O)[C@@H]4C(C)C)[C@@H](C2)C(=O)NC(C)(C)C)cc(C)C)n1        | 1.8  | nM |
| CHEMBL357039 | O[C@@H](C[C@]1(Cc2ccccc2)CCN([C@@H]3CS(=O)(=O)Cc4ccccc34)C1=O)[C@H](Cc5ccccc5)NC(=O)O[C@H]6CCOC6                        | 1.8  | nM |
| CHEMBL71440  | Cc1cc(SC2=C(O)OC(C)(CCc3ccc(O)cc3)CC2=O)c(cc1OS(=O)(=O)N)C(C)(C)C                                                       | 1.8  | nM |
| CHEMBL321778 | CC(C)[C@H]1[C@H](CCS1(=O)=O)OC(=O)N[C@@H](Cc2ccccc2)[C@H](O)CN3C[C@H]4CCS[C@H]4C[C@H]3C(=O)NC(C)(C)C                    | 1.84 | nM |
| CHEMBL316608 | CC(C)(C)NC(=O)[C@@H]1C[C@@H]2SCC[C@@H]2CN1C[C@@H](O)[C@H](CS3ccccc3)NC(=O)O[C@@H]4CCS(=O)(=O)C4                         | 1.84 | nM |
| CHEMBL431387 | CC(C)[C@@H]1NC(=O)CCCCCOc2ccc(C[C@H](NC1=O)[C@H](O)CN3CC4CCCC4C[C@H]3C(=O)NC(C)(C)C)cc2                                 | 1.84 | nM |
| CHEMBL37037  | CC(C)[C@]1(CCc2ccc(O)cc2)CC(=O)C(=C(O)O1)Sc3cc(C)c(CO)cc3C(C)(C)C                                                       | 1.9  | nM |
| CHEMBL348147 | CC(C)C(NC(=O)N(Cc1csc(n1)C(C)C)C2CC2)C(=O)N[C@@H](Cc3ccccc3)[C@@H](O)C[C@H](Cc4ccccc4)NC(=O)OCc5cncs5                   | 1.9  | nM |
| CHEMBL71334  | CCC(CC)NC(=O)C[C@@H](C(=O)NC[C@@H](O)[C@H](Cc1ccccc1)NC(=O)[C@H](CC(=O)N)NC(=O)c2enc3ccccc3n2)C(C)(C)C                  | 1.9  | nM |
| CHEMBL11137  | CC(C)(C)NC(=O)c1ccccc1C[C@@H](O)[C@H](Cc2ccccc2)NC(=O)[C@H](C[S+](O-))c3ccccc3)NS(=O)(=O)C                              | 1.9  | nM |
| CHEMBL171434 | Cc1cc(SC2=C(O)OC(C)(CCc3ccc(O)cc3)CC2=O)c(cc1NS(=O)(=O)Cn4ccnc4)C(C)(C)C                                                | 1.9  | nM |
| CHEMBL169878 | CC(C)C1(CCc2ccccc2)CC(=O)C(=C(O)O1)Sc3cc(C)c(NS(=O)(=O)Cn4ccnc4)cc3C(C)(C)C                                             | 1.9  | nM |
| CHEMBL21041  | CC(C)(C)OC(=O)N[C@@H](Cc1ccccc1)[C@@H](O)C[C@@H](Cc2ccccc2)C(=O)NC3[C@H](O)[C@H](N)c4ccccc34                            | 1.9  | nM |
| CHEMBL346943 | CC(C)C(NC(=O)OCc1nc(cs1)C(C)C)C(=O)N[C@@H](Cc2ccccc2)[C@@H](O)C[C@H](Cc3ccccc3)NC(=O)OCc4cncs4                          | 1.9  | nM |
| CHEMBL322804 | CC(C)[C@@H](NC(=O)OCc1cncnc1)C(=O)N[C@@H](Cc2ccccc2)[C@H](O)[C@H](O)[C@H](Cc3ccccc3)NC(=O)[C@@H](NC(=O)OCc4cncnc4)C(C)C | 1.98 | nM |
| CHEMBL45474  | CC(C)(C)OC(=O)N[C@@H](Cc1ccccc1)[C@@H](O)C[C@@H](Cc2ccccc2)OC(C)C3CCOCC3)cc2)C(=O)NC4[C@H](O)Cc5ccccc45                 | 2    | nM |
| CHEMBL75310  | CC(C)[C@@H]1[C@@H](CCS1(=O)=O)OC(=O)N[C@@H](Cc2ccccc2)[C@H](O)CN3CCN(Cc4ccc(C)nc4)C[C@H]3C(=O)NC(C)(C)C                 | 2    | nM |
| CHEMBL202110 | O[C@@H](C[C@]1(Cc2ccccc2)N=CC(=C1O)[C@@H]3[C@H](O)Cc4ccccc34)[C@H](Cc5ccccc5)NC(=O)O[C@H]6CCOC6                         | 2    | nM |
| CHEMBL382463 | NC(=O)O[C@@H]1Cc2ccccc2[C@@H]1C3=C(O)[C@@H](C[C@H](O)[C@H](Cc4ccccc4)NC(=O)O[C@H]5CCOC5)(Cc6ccccc6)N=C3                 | 2    | nM |
| CHEMBL169256 | Cc1cc(SC2=C(O)OC(C)(CCc3ccc(O)cc3)CC2=O)c(cc1OS(=O)(=O)Cn4ccnc4)C(C)(C)C                                                | 2    | nM |
| CHEMBL318668 | CC(C)(C)NC(=O)[C@@H]1C[C@@H]2CCCC[C@@H]2CN1C[C@@H](O)[C@H](Cc3ccccc3)NC(=O)[C@@H](CS(=O)(=O)c4ccc(F)cc4)NS(=O)(=O)C     | 2    | nM |
| CHEMBL274569 | CC(C)(C)NC(=O)c1ccccc1C[C@@H](O)[C@H](Cc2ccccc2)NC(=O)[C@H](CS(=O)(=O)c3ccc(cc3)C(F)(F)F)NS(=O)(=O)C                    | 2    | nM |
| CHEMBL178421 | CC(C)CN([C@@H](CCCCNC(=O)OCC1c2ccccc2c3ccccc13)C(=O)O)S(=O)(=O)c4ccc(N)cc4                                              | 2.1  | nM |
| CHEMBL200296 | COc1cc(CN2[C@H](Cc3ccccc3)[C@H](O)CN(N(Cc4ccc(O)c(OC)c4)C2=O)C(=O)CCCCN5CCOCC5)ccc1O                                    | 2.1  | nM |
| CHEMBL168369 | Cc1cc(SC2=C(O)OC(C)(CCc3ccc(O)cc3)CC2=O)c(cc1NS(=O)(=O)c4ccc(cc4)C#N)C(C)(C)C                                           | 2.1  | nM |
| CHEMBL318285 | CC(C)CN(C[C@@H](O)[C@H](Cc1ccccc1)NC(=O)[C@@H](C[S+](O-))c2ccc3ccccc3c2)NS(=O)(=O)C(=O)NC(C)(C)C                        | 2.1  | nM |
| CHEMBL98284  | CC(C)C[C@H](NC(=O)[C@@H](C[C@H](O)[C@H](Cc1ccccc1)NC(                                                                   | 2.1  | nM |

|               |                                                                                                                                                           |      |    |
|---------------|-----------------------------------------------------------------------------------------------------------------------------------------------------------|------|----|
|               | <chem>=O)OC(C)(C)Cc2ccccc2)C(=O)NCCO</chem>                                                                                                               |      |    |
| CHEMBL276833  | <chem>Cn1nnnc1[S+](O-)<br/>]C[C@H](NS(=O)(=O)C)C(=O)N[C@@H](Cc2ccccc2)[C@H](O)Cc3<br/>ccccc3C(=O)NC(C)(C)C</chem>                                         | 2.1  | nM |
| CHEMBL421330  | <chem>CC(C)(N1CCN(C[C@@H](O)C[C@@H](Cc2ccccc2)C(=O)N[C@@H]<br/>]3[C@H](O)COc4ccccc34)[C@@H](C1)C(=O)NCe5ccccc5)c6oc7ccnc<br/>c7c6</chem>                  | 2.19 | nM |
| CHEMBL86226   | <chem>CC(C)C1(CCc2ccc(N)cc2)CC(=O)C(=C(O)O1)Sc3cc(C)c(OS(=O)(=O)<br/>Cn4ccnc4)cc3C(C)(C)C</chem>                                                          | 2.2  | nM |
| CHEMBL66399   | <chem>CCC(CC)NC(=O)C[C@@H](C(=O)NC[C@@H](O)[C@H](Cc1ccccc1<br/>)NC(=O)[C@H](CC(=O)N)NC(=O)c2ccc3ccccc3n2)C(C)(C)C</chem>                                  | 2.2  | nM |
| CHEMBL351994  | <chem>CC(C)CCN(C[C@@H](O)[C@H](Cc1ccccc1)NC(=O)[C@H](CC(=O)<br/>N)NC(=O)OCe2cccn2)S(=O)(=O)c3ccccc3</chem>                                                | 2.2  | nM |
| CHEMBL113626  | <chem>CC(C)[C@@H](NC(=O)\C=C\c1ccenc1)C(=O)N[C@@H](Cc2ccccc2)<br/>C(O)[C@H](Cc3ccccc3)NC(=O)[C@@H](NC(=O)\C=C\c4ccnc4)C(C)<br/>)C</chem>                  | 2.2  | nM |
| CHEMBL171229  | <chem>CCCC1(CCc2ccc(O)cc2)CC(=O)C(=C(O)O1)Sc3cc(C)c(OS(=O)(=O)C<br/>n4ccnc4)cc3C(C)(C)C</chem>                                                            | 2.2  | nM |
| CHEMBL356205  | <chem>CN1C=C(CN2CCN(C[C@@H](O)C[C@@H](Cc3ccccc3)C(=O)NC4[<br/>C@H](O)Cc5ccccc45)[C@@H](C2)C(=O)NC(C)(C)C)C=CC1=O</chem>                                   | 2.2  | nM |
| CHEMBL169391  | <chem>CC(C)C1(CCc2ccc(O)cc2)CC(=O)C(=C(O)O1)Sc3cc(C)c(NS(=O)(=O)<br/>c4ccc(cc4)C#N)cc3C(C)(C)C</chem>                                                     | 2.2  | nM |
| CHEMBL166757  | <chem>CC(C)C1(CCc2ccc(O)cc2)CC(=O)C(=C(O)O1)Sc3cc(C)c(OS(=O)(=O)<br/>C)cc3C(C)(C)C</chem>                                                                 | 2.2  | nM |
| CHEMBL66460   | <chem>CCC(CC)NC(=O)C[C@@H](C(=O)NC[C@@H](O)[C@H](Cc1ccccc1<br/>)NC(=O)[C@@H](NC(=O)c2cnc3ccccc3n2)C(C)C)C(C)(C)C</chem>                                   | 2.2  | nM |
| CHEMBL71472   | <chem>CCNS(=O)(=O)Oc1cc(c(SC2=C(O)OC(C)(CCc3ccc(O)cc3)CC2=O)cc1<br/>C)C(C)(C)C</chem>                                                                     | 2.3  | nM |
| CHEMBL418528  | <chem>CC(C)(C)NC(=O)c1ccccc1C[C@@H](O)[C@H](Cc2ccccc2)NC(=O)[C<br/>@H](C[S+](O-))c3ccc(cc3)C(F)(F)F)NS(=O)(=O)C</chem>                                    | 2.3  | nM |
| CHEMBL306772  | <chem>CC(C)[C@@H]1[C@@H](CCS1(=O)=O)OC(=O)N[C@@H](Cc2ccccc<br/>c2)[C@H](O)CN3CCN(Cc4cc(nc(c4)C(C)C)C(C)C)C[C@H]3C(=O)N<br/>C(C)(C)C</chem>                | 2.3  | nM |
| CHEMBL347824  | <chem>CCN(CCc1esc(n1)C(C)C)C(=O)NC(C)C(=O)N[C@H](C[C@H](O)[C<br/>@H](Cc2ccccc2)NC(=O)OCe3cncs3)Cc4ccccc4</chem>                                           | 2.3  | nM |
| CHEMBL3351098 | <chem>CC[C@H](C)[C@H](NC(=O)[C@@H]1CCCN1C[C@H](O)[C@H](C<br/>c2ccccc2)NC(=O)[C@H](CC(=O)N)NC(=O)c3ccc4ccccc4n3)C(=O)N[<br/>C@@H](Cc5ccccc5)C(=O)OC</chem> | 2.3  | nM |
| CHEMBL104118  | <chem>CCNC(=O)[C@@H](NC(=O)CCc1ccccc1)[C@@H]2N[C@@H](C(=O)<br/>)NCCNC(=O)[C@@H]3N[C@H](SC3(C)C)[C@H](NC(=O)CCc4ccccc<br/>c4)C(=O)NCC)C(C)(C)S2</chem>     | 2.4  | nM |
| CHEMBL383732  | <chem>NC(=O)C[C@H]1CC(C2=C(O)[C@@](C[C@H](O)[C@H](Cc3ccccc3<br/>)NC(=O)O[C@H]4CCOC4)(Cc5ccccc5)N=C2)c6ccccc16</chem>                                      | 2.4  | nM |
| CHEMBL170162  | <chem>CC(C)C1(CCc2ccc(O)cc2)CC(=O)C(=C(O)O1)Sc3cc(C)c(OS(=O)(=O)<br/>Cn4ccnc4)cc3C(C)(C)C</chem>                                                          | 2.4  | nM |
| CHEMBL266398  | <chem>COc1ccc(cc1)S(=O)(=O)C[C@H](NS(=O)(=O)C)C(=O)N[C@@H](Cc<br/>2ccccc2)[C@H](O)Cc3ccccc3C(=O)NC(C)(C)C</chem>                                          | 2.4  | nM |
| CHEMBL123229  | <chem>Cc1cc(SC2=C(O)OC(CCc3ccc(O)c3)(CC2=O)c4ccccc4)c(cc1CO)C(C)<br/>(C)C</chem>                                                                          | 2.5  | nM |
| CHEMBL419072  | <chem>CC(C)[C@@H]1[C@@H](CCS1(=O)=O)OC(=O)N[C@@H](Cc2ccccc<br/>c2)[C@H](O)CN3CCN(Cc4cc(C)nc(C)c4)C[C@H]3C(=O)NC(C)(C)C</chem>                             | 2.5  | nM |
| CHEMBL377274  | <chem>CC(C)(C)OC(=O)N[C@@H](Cc1ccccc1)[C@@H](O)C[C@]2(Cc3ccc<br/>cc3)N=CC(=C2O)C4C5OC(=O)N[C@@H]5c6ccccc6</chem>                                          | 2.5  | nM |
| CHEMBL304086  | <chem>CCC(CC)NC(=O)C[C@@H](C(=O)NC[C@@H](O)[C@H](Cc1ccccc1<br/>)NC(=O)[C@@H](NC(=O)c2ccc3ccccc3n2)C(C)C)C(C)(C)C</chem>                                   | 2.5  | nM |
| CHEMBL169714  | <chem>CC(C)C1(CCc2ccc(O)cc2)CC(=O)C(=C(O)O1)Sc3cc(C)c(NS(=O)(=O)<br/>c4cccn4)cc3C(C)(C)C</chem>                                                           | 2.6  | nM |

|               |                                                                                                                                                 |      |    |
|---------------|-------------------------------------------------------------------------------------------------------------------------------------------------|------|----|
| CHEMBL90090   | <chem>Cc1c(N)cccc1C(=O)N[C@@H](Cc2ccccc2)[C@@H](O)C[C@H](Cc3ccccc3)NC(=O)OC(C)(C)C</chem>                                                       | 2.6  | nM |
| CHEMBL307926  | <chem>CC(C)(C)NC(=O)[C@@H]1C[C@@H]2CCCC[C@@H]2CN1C[C@@H](O)[C@H](Cc3ccccc3)NC(=O)[C@@H](NC(=O)c4ccc5ccccc5n4)C6CCCC6</chem>                     | 2.6  | nM |
| CHEMBL265588  | <chem>CC(C)CN(C[C@@H](O)[C@H](Cc1ccccc1)NC(=O)COc2c(C)cccc2C)S(=O)(=O)c3ccc(N)cc3</chem>                                                        | 2.6  | nM |
| CHEMBL354867  | <chem>CC(C)C1(CCc2ccc(O)cc2)CC(=O)C(=C(O)O1)Sc3cc(C)c(NS(=O)(=O)c4ccnc4)cc3C(C)(C)C</chem>                                                      | 2.6  | nM |
| CHEMBL302289  | <chem>CC(C)C1(CCc2ccc(O)cc2)CC(=O)C(=C(O)O1)Sc3cc(C)c(OS(=O)(=O)N4CCOCC4)cc3C(C)(C)C</chem>                                                     | 2.6  | nM |
| CHEMBL97847   | <chem>CCC(C)[C@H](NC(=O)[C@@H](C[C@H](O)[C@H](Cc1ccccc1)NC(=O)OC(C)(C)C)Cc2ccccc2)C(=O)N</chem>                                                 | 2.7  | nM |
| CHEMBL38268   | <chem>CC(C)C1(CCc2ccc(O)cc2)CC(=O)C(=C(O)O1)Sc3cc(C)c(N)cc3C(C)(C)C</chem>                                                                      | 2.7  | nM |
| CHEMBL29259   | <chem>Cc1ccc(C(=O)NC(C)(C)C)c(C[C@@H](O)[C@H](Cc2ccccc2)NC(=O)[C@H](CC(=O)N)NC(=O)c3ccc4ccccc4n3)c1</chem>                                      | 2.73 | nM |
| CHEMBL265026  | <chem>CC(C)(C)NC(=O)[C@@H]1C[C@@H]2CCCC[C@@H]2CN1C[C@@H](O)[C@H](Cc3ccccc3)NC(=O)[C@@H](NC(=O)c4cncn4)[C@H]5CCOC5</chem>                        | 2.83 | nM |
| CHEMBL289195  | <chem>CC(C)[C@H](NC(=O)[C@@H](C[C@H](O)[C@H](Cc1ccccc1)NC(=O)OC(C)(C)C)Cc2ccccc2)C(=O)N[C@@H](Cc3ccccc3)C(=O)N</chem>                           | 2.9  | nM |
| CHEMBL96996   | <chem>CC(C)[C@H](NC(=O)[C@@H](C[C@H](O)[C@H](Cc1ccccc1)NC(=O)OC(C)(C)C)Cc2ccccc2)C(=O)NCCCN3CCOCC3</chem>                                       | 2.9  | nM |
| CHEMBL69062   | <chem>CCC(CC)NC(=O)C[C@@H](C(=O)NC[C@@H](O)[C@H](Cc1ccccc1)NC(=O)[C@@H](NC(=O)OCc2ccccc2)C(C)C)C(C)(C)C</chem>                                  | 2.9  | nM |
| CHEMBL106633  | <chem>CCNC(=O)[C@@H](NC(=O)\C=C/c1ccccc1)[C@@H]2N[C@@H](C(=O)NCCNC(=O)[C@@H]3N[C@H](SC3(C)C)[C@H](NC(=O)\C=C/c4ccccc4)C(=O)NCC)C(C)(C)S2</chem> | 2.9  | nM |
| CHEMBL336684  | <chem>COc1ccc(cc1)S(=O)(=O)N(CC(C)C)C[C@@H](O)[C@H](Cc2ccccc2)NC(=O)OCc3ccccc3</chem>                                                           | 3    | nM |
| CHEMBL169381  | <chem>CC(C)C1(CCc2ccccc2)CC(=O)C(=C(O)O1)Sc3cc(C)c(NS(=O)(=O)c4cccn4)cc3C(C)(C)C</chem>                                                         | 3    | nM |
| CHEMBL98002   | <chem>CC(C)(C)NC(=O)N(C[C@@H](O)[C@H](Cc1ccccc1)NC(=O)[C@H](CC(=O)N)NC(=O)c2ccc3ccccc3n2)Cc4ccccc4</chem>                                       | 3    | nM |
| CHEMBL109371  | <chem>CC(C)[C@@H](NC(=O)OCc1ccccc1)C(=O)N[C@@H](Cc2ccccc2)[C@H](O)[C@H](Cc3ccccc3)NC(=O)[C@@H](NC(=O)OCc4cccn4)C(C)C</chem>                     | 3    | nM |
| CHEMBL354829  | <chem>CC(C)C1(CCc2ccccc2)CC(=O)C(=C(O)O1)Sc3cc(C)c(OS(=O)(=O)Cn4ccnc4)cc3C(C)(C)C</chem>                                                        | 3    | nM |
| CHEMBL1790508 | <chem>CCC(CC)NC(=O)C[C@@H](C(=O)NC[C@@H](O)[C@H](Cc1ccccc1)NC(=O)[C@@H](NC(=O)c2cnc3ccccc3n2)[C@H](C)O)C(C)(C)C</chem>                          | 3    | nM |
| CHEMBL105695  | <chem>CC1(C)S[C@@H](N[C@H]1C(=O)NCCNC(=O)[C@@H]2N[C@H](SC2(C)C)[C@H](NC(=O)Cc3ccccc3)C(=O)N)[C@H](NC(=O)Cc4ccccc4)C(=O)N</chem>                 | 3    | nM |
| CHEMBL430891  | <chem>CC(C)[C@@H](NC(=O)OCc1ccccc1)C(=O)N[C@@H](Cc2ccccc2)[C@H](O)[C@H](Cc3ccccc3)NC(=O)[C@@H](NC(=O)OCc4ccccc4)C(C)C</chem>                    | 3    | nM |
| CHEMBL70444   | <chem>CCCNS(=O)(=O)Oc1cc(c(SC2=C(O)OC(CCc3ccc(O)cc3)(CC2=O)C(C)C)cc1C)C(C)(C)C</chem>                                                           | 3    | nM |
| CHEMBL263540  | <chem>COc1ccc(cc1)S(=O)(=O)N(CC(C)C)C[C@@H](O)[C@H](Cc2ccccc2)NC(=O)c3ccc(O)c3C</chem>                                                          | 3    | nM |
| CHEMBL72474   | <chem>CC(C)[C@H](NC(=O)C)C(=O)N[C@@H](Cc1ccccc1)[C@H](O)CN2CC3CCCCC3C[C@H]2C(=O)NC(C)(C)C</chem>                                                | 3    | nM |
| CHEMBL99616   | <chem>CC(C)CCN(C[C@@H](O)[C@H](Cc1ccccc1)NC(=O)[C@H](CC(=O)N)NC(=O)c2ccc3ccccc3n2)C(=O)NC(C)(C)C</chem>                                         | 3    | nM |
| CHEMBL315121  | <chem>CCCC1(CCc2ccccc2)OC(=C(C(CC)c3ccc(NS(=O)(=O)c4ccc(ccn4)C#N</chem>                                                                         | 3    | nM |

|               |                                                                                                                                                           |      |    |
|---------------|-----------------------------------------------------------------------------------------------------------------------------------------------------------|------|----|
|               | )c3)C(=O)O1)O                                                                                                                                             |      |    |
| CHEMBL123287  | Cc1cc(SC2=C(O)OC(Cc3ccc(N)cc3)(CC2=O)c4ccccc4)c(cc1CO)C(C)(C)C                                                                                            | 3.1  | nM |
| CHEMBL71509   | CC(C)C1(CCc2ccc(O)cc2)CC(=O)C(=C(O)O1)Sc3cc(C)c(OS(=O)(=O)N4CCN(C)CC4)cc3C(C)(C)C                                                                         | 3.1  | nM |
| CHEMBL3349509 | CC[C@H](C)[C@H](NC(=O)[C@@H]1CCCN1C(=O)[C@@H](O)[C@H](Cc2ccccc2)NC(=O)[C@@H](CC(=O)N)NC(=O)OCc3ccccc3)C(=O)N[C@@H](C(C)C)C(=O)OC                          | 3.1  | nM |
| CHEMBL121706  | Cc1cc(SC2=C(O)OC(Cc3ccc(N)cc3)(CC2=O)C4CCCCC4)c(cc1CO)C(C)(C)C                                                                                            | 3.2  | nM |
| CHEMBL93540   | CC(C)(C)OC(=O)N[C@H](C[C@H](O)[C@H](Cc1ccccc1)NC(=O)c2ccc(O)cc2)Cc3ccccc3                                                                                 | 3.3  | nM |
| CHEMBL318217  | CC(C)(C)NC(=O)[C@@H]1C[C@@H]2SCC[C@@H]2CN1C[C@@H](O)[C@H](CSc3ccccc3)NC(=O)OCc4ccccc4                                                                     | 3.3  | nM |
| CHEMBL327611  | COc1cc(ccc1O)C(=O)N[C@@H](Cc2ccccc2)[C@@H](O)C[C@H](Cc3ccccc3)NC(=O)OC(C)(C)C                                                                             | 3.3  | nM |
| CHEMBL93566   | CC(C)(C)OC(=O)N[C@H](C[C@H](O)[C@H](Cc1ccccc1)NC(=O)c2c(N)ccc2Cl)Cc3ccccc3                                                                                | 3.3  | nM |
| CHEMBL169074  | CCNS(=O)(=O)Nc1cc(c(SC2=C(O)OC(Cc3ccccc3)(CC2=O)C(C)C)cc1C)C(C)(C)C                                                                                       | 3.3  | nM |
| CHEMBL312293  | CC(C)C1(CCc2ccc(O)cc2)CC(=O)C(=C(O)O1)Sc3cc(C)c(OS(=O)(=O)N(C)C)cc3C(C)(C)C                                                                               | 3.4  | nM |
| CHEMBL93481   | CC(C)(C)OC(=O)N[C@H](C[C@H](O)[C@H](Cc1ccccc1)NC(=O)c2c(N)cc2Cl)Cc3ccccc3                                                                                 | 3.4  | nM |
| CHEMBL58522   | CC(C)[C@H](NC(=O)[C@@H](C[C@H](O)[C@H](Cc1ccccc1)NC(=O)OC(C)(C)C)Cc2ccccc2)C(=O)NCCCN(C)C                                                                 | 3.4  | nM |
| CHEMBL101962  | COc1cc(CC(=O)N[C@@H](C(C)C)C(=O)N[C@@H](Cc2ccccc2)[C@@H](O)[C@H](O)[C@H](Cc3ccccc3)NC(=O)[C@@H](NC(=O)Cc4cc(OC)c(OC)c(OC)c4)C(C)C)cc(OC)c1OC              | 3.4  | nM |
| CHEMBL273562  | CC(C)(C)OC(=O)N[C@H](C[C@H](O)[C@H](Cc1ccccc1)NC(=O)c2ccc(O)c2)Cc3ccccc3                                                                                  | 3.4  | nM |
| CHEMBL325267  | CCOc1ccc(CN2CCN(C[C@@H](O)C[C@@H](Cc3ccccc3)C(=O)NC4[C@H](O)Cc5ccccc45)[C@@H](C2)C(=O)NC(C)(C)C)en1                                                       | 3.4  | nM |
| CHEMBL265095  | CC(C)C1(CCc2ccc(O)cc2)CC(=O)C(=C(O)O1)Sc3cc(C)c(NC(=O)C)cc3C(C)(C)C                                                                                       | 3.4  | nM |
| CHEMBL288033  | CC(C)C1(CCc2ccccc2)CC(=O)C(=C(O)O1)Sc3cc(C)c(N)cc3C(C)(C)C                                                                                                | 3.45 | nM |
| CHEMBL171786  | CC(C)C1(CCc2ccc(O)cc2)CC(=O)C(=C(O)O1)Sc3cc(C)c(OS(=O)(=O)c4ccccc4)cc3C(C)(C)C                                                                            | 3.5  | nM |
| CHEMBL36608   | CC(C)C1(CCc2ccccc2)CC(=O)C(=C(O)O1)Sc3cc(C)c(NC(=O)C)cc3C(C)(C)C                                                                                          | 3.5  | nM |
| CHEMBL353086  | CC(C)C1(CCc2ccccc2)CC(=O)C(=C(O)O1)Sc3cc(C)c(NS(=O)(=O)c4ccccc4)cc3C(C)(C)C                                                                               | 3.5  | nM |
| CHEMBL77671   | CC[C@H](C)[C@H](NC(=O)[C@@H]1CCCN1C[C@H](Cc2ccccc2)NC(=O)[C@H](CC(=O)N)NC(=O)[C@H](CCC(=O)N)NC(=O)[C@H](CO)NC(=O)[C@@H](N)C(C)C)C(=O)N[C@@H](C(C)C)C(=O)O | 3.5  | nM |
| CHEMBL354616  | Cc1cc(SC2=C(O)OC(C)(Cc3ccc(O)cc3)CC2=O)c(cc1NS(=O)(=O)c4cc(Cl)cc4)C(C)(C)C                                                                                | 3.5  | nM |
| CHEMBL273368  | CC(C)(C)NC(=O)c1ccccc1C[C@@H](O)[C@H](Cc2ccccc2)NC(=O)[C@H](C[S+](O-))c3ccc4ccccc4c3)NS(=O)(=O)C                                                          | 3.5  | nM |
| CHEMBL29312   | CC(C)(C)NC(=O)c1c(C[C@@H](O)[C@H](Cc2ccccc2)NC(=O)[C@H](CC(=O)N)NC(=O)c3ccc4ccccc4n3)ccc5ccccc15                                                          | 3.5  | nM |
| CHEMBL378214  | COC(=O)N[C@@H](C(c1ccccc1)c2ccccc2)C(=O)NCCCC[C@H](CO)N(CC(C)C)S(=O)(=O)c3ccc(N)cc3                                                                       | 3.54 | nM |
| CHEMBL433616  | CC(C)CC1(CCc2ccc(O)cc2)CC(=O)C(=C(O)O1)Sc3cc(C)c(OS(=O)(=O)Cn4ccccc4)cc3C(C)(C)C                                                                          | 3.6  | nM |
| CHEMBL1790509 | CCC(CC)NC(=O)C[C@@H](C(=O)NC[C@@H](O)[C@H](Cc1ccccc1)NC(=O)[C@@H](NC(=O)c2ccc3ccccc3n2)[C@H](C)O)C(C)(C)C                                                 | 3.6  | nM |

|               |                                                                                                                                                                                 |     |    |
|---------------|---------------------------------------------------------------------------------------------------------------------------------------------------------------------------------|-----|----|
| CHEMBL168269  | <chem>Cc1cc(SC2=C(O)OC(Cc3ccc(O)cc3)(CC2=O)C4CC4)c(cc1NS(=O)(=O)c5ccccc5)C(C)(C)C</chem>                                                                                        | 3.6 | nM |
| CHEMBL351155  | <chem>CC(C)C1(CCc2ccccc2)CC(=O)C(=C(O)O1)Sc3cc(C)c(NS(=O)(=O)c4ccs4)cc3C(C)(C)C</chem>                                                                                          | 3.6 | nM |
| CHEMBL56247   | <chem>CC(C)[C@@H]1[C@@H](CCS1(=O)=O)OC(=O)N[C@@H](Cc2ccccc2)[C@H](O)CN3CCN(Cc4ccsc4)C[C@H]3C(=O)NC(C)(C)C</chem>                                                                | 3.6 | nM |
| CHEMBL354783  | <chem>CC(C)C1(CCc2ccc(O)cc2)CC(=O)C(=C(O)O1)Sc3cc(C)c(NS(=O)(=O)N(C)C)cc3C(C)(C)C</chem>                                                                                        | 3.6 | nM |
| CHEMBL170117  | <chem>Cc1cc(SC2=C(O)OC(C)(Cc3ccc(O)cc3)CC2=O)c(cc1NS(=O)(=O)c4ccc(F)cc4)C(C)(C)C</chem>                                                                                         | 3.7 | nM |
| CHEMBL123042  | <chem>Cc1cc(SC2=C(O)OC(Cc3ccccc3)(CC2=O)c4ccc(OCCO)cc4)c(cc1O)C(C)(C)C</chem>                                                                                                   | 3.7 | nM |
| CHEMBL69755   | <chem>CCC(CC)NC(=O)C[C@@H](C(=O)NC[C@@H](O)[C@H](Cc1ccccc1)NC(=O)[C@H](CC(=O)N)NC(=O)OCc2ccccc2)C(C)(C)C</chem>                                                                 | 3.8 | nM |
| CHEMBL104576  | <chem>CC1(C)S[C@@H](N[C@H]1C(=O)N[C@H](Cc2ccccc2)[C@H](O)CC(=O)Nc3nc4ccccc4[nH]3)[C@H](NC(=O)Cc5ccccc5)C(=O)NCc6ccccc6</chem>                                                   | 3.8 | nM |
| CHEMBL290442  | <chem>CCCC1(CCc2ccc(O)cc2)CC(=O)C(=C(O)O1)Sc3cc(C)c(N)cc3C(C)(C)C</chem>                                                                                                        | 3.8 | nM |
| CHEMBL198734  | <chem>COc1cc(CN2[C@H](Cc3ccccc3)[C@H](O)CN(N(Cc4ccc(O)c(OC)c4)C2=O)C(=O)CCCN5CCOCC5)ccc1O</chem>                                                                                | 3.8 | nM |
| CHEMBL330565  | <chem>CC(C)[C@@H]1[C@@H](CCS1(=O)=O)OC(=O)N[C@@H](Cc2ccccc2)[C@H](O)CN3CCN(C[C@H]3C(=O)NC(C)(C)C)C4CC(C4)c5ccccc5</chem>                                                        | 3.8 | nM |
| CHEMBL306421  | <chem>CC(C)C1(CCc2ccc(N)cc2)CC(=O)C(=C(O)O1)Sc3cc(C)c(OS(=O)(=O)N(C)C)cc3C(C)(C)C</chem>                                                                                        | 3.9 | nM |
| CHEMBL68032   | <chem>CC(C)C1(CCc2ccccc2)CC(=O)C(=C(O)O1)Sc3cc(C)c(OS(=O)(=O)N4CCN(C)CC4)cc3C(C)(C)C</chem>                                                                                     | 3.9 | nM |
| CHEMBL305458  | <chem>CC(C)[C@@H](N[C@@H](C)C(=O)OCc1ccccc1)C(=O)N[C@@H](Cc2ccccc2)[C@@H](O)[C@H](O)[C@H](Cc3ccccc3)NC(=O)[C@@H](NC(=O)[C@H](C)NC(=O)OCc4ccccc4)C(C)C</chem>                    | 4   | nM |
| CHEMBL13134   | <chem>CC(C)[C@H](NC(=O)c1ccc2ccccc2n1)C(=O)N[C@@H](Cc3ccccc3)[C@H](O)CN4CC[C@H](C[C@H]4C(=O)NC(C)(C)C)OCc5ccncc5</chem>                                                         | 4   | nM |
| CHEMBL123022  | <chem>Cc1cc(SC2=C(O)OC(Cc3ccc(N)c3)(CC2=O)c4ccccc4)c(cc1CO)C(C)(C)C</chem>                                                                                                      | 4   | nM |
| CHEMBL87092   | <chem>CC(C)(C)OC(=O)NC(Cc1ccccc1)C(=O)C(F)(F)C(=O)NCc2ccccc2</chem>                                                                                                             | 4   | nM |
| CHEMBL352964  | <chem>CC(C)C1(CCc2ccc(O)cc2)CC(=O)C(=C(O)O1)Sc3cc(C)c(NS(=O)(=O)C)cc3C(C)(C)C</chem>                                                                                            | 4   | nM |
| CHEMBL3350878 | <chem>CC[C@H](C)[C@H](NC(=O)[C@@H]1CCCN1C[C@H](O)[C@H](Cc2ccccc2)NC(=O)[C@H](CC(=O)N)NC(=O)OCc3ccccc3)C(=O)N[C@@H](Cc4ccccc4)C(=O)OC</chem>                                     | 4   | nM |
| CHEMBL113627  | <chem>CC(C)[C@@H](NC(=O)OCc1ccccc1)C(=O)N[C@@H](Cc2ccccc2)[C@H](O)[C@H](Cc3ccccc3)NC(=O)[C@@H](NC(=O)OCc4ccccc4)C(C)C</chem>                                                    | 4   | nM |
| CHEMBL35271   | <chem>Cc1cc(SC2=C(O)OC(Cc3ccc(O)cc3)(CC2=O)C4CC4)c(cc1N)C(C)(C)C</chem>                                                                                                         | 4.1 | nM |
| CHEMBL332868  | <chem>Cc1cc(SC2=C(O)OC(Cc3ccc(O)cc3)(CC2=O)C4CCCC4)c(cc1CO)C(C)(C)C</chem>                                                                                                      | 4.1 | nM |
| CHEMBL157673  | <chem>CCCN(Cc1csc(n1)C(C)C)C(=O)NC(C)C(=O)N[C@H](C[C@H](O)[C@H](Cc2ccccc2)NC(=O)OCc3cnsc3)Cc4ccccc4</chem>                                                                      | 4.1 | nM |
| CHEMBL274534  | <chem>CC(C)(C)OC(=O)CNC(=O)[C@@H](NC(=O)c1ccccc1c2ccccc2)[C@@H]3N[C@@H](C(=O)NCCNC(=O)[C@@H]4N[C@H](SC4(C)C)[C@H](NC(=O)c5ccccc5c6ccccc6)C(=O)NCC(=O)OC(C)(C)C)C(C)(C)S3</chem> | 4.1 | nM |
| CHEMBL167243  | <chem>CC(C)C1(CCc2ccc(N)cc2)CC(=O)C(=C(O)O1)Sc3cc(C)c(OS(=O)(=O)c4ccccc4)cc3C(C)(C)C</chem>                                                                                     | 4.1 | nM |
| CHEMBL328531  | <chem>CC(C)(C)OC(=O)N[C@H](C[C@H](O)[C@H](Cc1ccccc1)NC(=O)c2c</chem>                                                                                                            | 4.1 | nM |



|               |                                                                                                                                                       |      |    |
|---------------|-------------------------------------------------------------------------------------------------------------------------------------------------------|------|----|
|               | <chem>cc(O)c(O)c2)Cc3ccccc3</chem>                                                                                                                    |      |    |
| CHEMBL171720  | <chem>CC(C)C1(CCc2ccc(O)cc2)CC(=O)C(=C(O)O1)Sc3cc(C)c(NS(=O)(=O)c4ccc(F)cc4)cc3C(C)(C)C</chem>                                                        | 4.1  | nM |
| CHEMBL122847  | <chem>Cc1cc(SC2=C(O)OC(C)(CCc3ccc(O)cc3)CC2=O)c(cc1CO)C(C)(C)C</chem>                                                                                 | 4.3  | nM |
| CHEMBL305204  | <chem>CCNS(=O)(=O)Oc1cc(c(SC2=C(O)OC(CCc3ccc(N)cc3)(CC2=O)C(C)C)cc1C)C(C)(C)C</chem>                                                                  | 4.3  | nM |
| CHEMBL11426   | <chem>CC(C)(C)NC(=O)c1ccccc1C[C@@H](O)[C@H](Cc2ccccc2)NC(=O)[C@H](CSc3ccc(F)cc3)NS(=O)(=O)C</chem>                                                    | 4.4  | nM |
| CHEMBL432962  | <chem>CC1(C)S[C@@H](N[C@H]1C(=O)NCCNC(=O)[C@@H]2N[C@H](SC2(C)C)[C@H](NC(=O)Cc3ccccc3)C(=O)NCC(F)(F)F)[C@H](NC(=O)Cc4ccccc4)C(=O)NCC(F)(F)F</chem>     | 4.4  | nM |
| CHEMBL38384   | <chem>CCCCC1(CCc2ccc(O)cc2)CC(=O)C(=C(O)O1)Sc3cc(C)c(N)cc3C(C)(C)C</chem>                                                                             | 4.4  | nM |
| CHEMBL76352   | <chem>CC(C)(C)NC(=O)[C@@H]1C[C@@H]2CCCC[C@@H]2CN1C[C@@H](O)[C@H](Cc3ccccc3)NC(=O)[C@@H](NC(=O)c4ccc5ccccc5n4)[C@H]6CCS(=O)(=O)C6</chem>               | 4.42 | nM |
| CHEMBL3350611 | <chem>CC(C)(C)NC(=O)C1CCCCN1C[C@@H](O)[C@H](Cc2ccccc2)NC(=O)[C@H](CC(=O)N)NC(=O)c3ccc4ccccc4n3</chem>                                                 | 4.47 | nM |
| CHEMBL122802  | <chem>COCc1cc(c(SC2=C(O)OC(CCc3ccccc3)(CC2=O)c4ccc(OCCO)cc4)cc1C)C(C)(C)C</chem>                                                                      | 4.5  | nM |
| CHEMBL91600   | <chem>CC(C)(C)OC(=O)N[C@H](C[C@H](O)[C@H](Cc1ccccc1)NC(=O)c2ccccc2)Cc3ccccc3</chem>                                                                   | 4.5  | nM |
| CHEMBL168839  | <chem>CC(C)C1(CCc2ccc(O)cc2)CC(=O)C(=C(O)O1)Sc3cc(C)c(OS(=O)(=O)c4ccc(cc4)C#N)cc3C(C)(C)C</chem>                                                      | 4.5  | nM |
| CHEMBL58277   | <chem>CC(C)(C)NC(=O)c1ccccc1C[C@@H](O)C[C@@H](Cc2ccccc2)C(=O)N[C@@H]3[C@H](O)Cc4ccccc34</chem>                                                        | 4.7  | nM |
| CHEMBL90313   | <chem>CC(C)[C@@H]1[C@@H](CCS1(=O)=O)OC(=O)N[C@@H](Cc2ccccc2)[C@H](O)CN3CCN(C[C@H]3C(=O)NC(C)(C)C)C4CC4</chem>                                         | 4.8  | nM |
| CHEMBL106486  | <chem>CC(C)[C@@H](NC(=O)OCc1ccccc1)C(=O)N[C@@H](Cc2ccccc2)C(O)[C@H](Cc3ccccc3)NC(=O)[C@@H](NC(=O)OCc4ccccc4)C(C)C</chem>                              | 4.8  | nM |
| CHEMBL306297  | <chem>CCNS(=O)(=O)Oc1cc(c(SC2=C(O)OC(CCc3ccc(O)cc3)(CC2=O)C4CCCC4)cc1C)C(C)(C)C</chem>                                                                | 4.8  | nM |
| CHEMBL90174   | <chem>CC[C@H](C)[C@@H](NC(=O)OCc1ccccc1)C(=O)N[C@@H](Cc2ccccc2)C(O)[C@H](Cc3ccccc3)NC(=O)[C@@H](NC(=O)OCc4ccccc4)[C@@H](C)CC</chem>                   | 4.9  | nM |
| CHEMBL70986   | <chem>CCNS(=O)(=O)Oc1cc(c(SC2=C(O)OC(CCc3ccc(O)cc3)(CC2=O)C(C)C)cc1C)C(C)(C)C</chem>                                                                  | 4.9  | nM |
| CHEMBL359756  | <chem>CC(C)CN([C@@H](CCCCNC(=O)OCC1c2ccccc2c3ccccc13)C(=O)O)S(=O)(=O)c4ccc(C)cc4</chem>                                                               | 5    | nM |
| CHEMBL37597   | <chem>CC(C)C1(CCc2ccc(O)cc2)CC(=O)C(=C(O)O1)Sc3cc(C)c(NC(=O)c4ccc(cc4)C#N)cc3C(C)(C)C</chem>                                                          | 5    | nM |
| CHEMBL78217   | <chem>CC(C)C1(CCC2CCCO2)CC(=O)C(=C(O)O1)Sc3cc(C)c(CO)cc3C(C)(C)C</chem>                                                                               | 5    | nM |
| CHEMBL139538  | <chem>COc1ccc(cc1)S(=O)(=O)N(CC(C)C)C[C@@H](O)[C@H](Cc2ccccc2)NC(=O)c3ccccc3C</chem>                                                                  | 5    | nM |
| CHEMBL317882  | <chem>CC1(C)S[C@@H](N[C@H]1C(=O)NCC(O)CNC(=O)[C@@H]2N[C@H](SC2(C)C)[C@H](NC(=O)Cc3ccccc3)C(=O)NCc4ccccc4)[C@H](NC(=O)Cc5ccccc5)C(=O)NCc6ccccc6</chem> | 5    | nM |
| CHEMBL169535  | <chem>CC(C)C1(CCc2ccc(O)cc2)CC(=O)C(=C(O)O1)Sc3cc(C)c(OS(=O)(=O)c4ccccc4)cc3C(C)(C)C</chem>                                                           | 5    | nM |
| CHEMBL317933  | <chem>CC(C)(C)NC(=O)N(C[C@@H](O)[C@H](Cc1ccccc1)NC(=O)[C@H](CC(=O)N)NC(=O)c2ccc3ccccc3n2)CC4CCCCC4</chem>                                             | 5    | nM |
| CHEMBL39130   | <chem>CCCC[C@H](CC(O)C[C@@H](CCCC)C(=O)N[C@@H](C(C)C)C(=O)N[C@@H](C(C)C)C(=O)OC</chem>                                                                | 5    | nM |
| CHEMBL125448  | <chem>OC(=O)CCCCC1(CC(=O)C(=C(O)O1)SCCc2ccccc2)c3ccccc3</chem>                                                                                        | 5    | nM |
| CHEMBL281439  | <chem>COC(=O)[C@@H](NC(=O)[C@@H](NC(=O)[C@@H](CC(O)C[C@</chem>                                                                                        | 5    | nM |

|              |                                                                                                                                                      |      |    |
|--------------|------------------------------------------------------------------------------------------------------------------------------------------------------|------|----|
| CHEMBL38154  | <chem>@H](Cc1ccccc1)C(=O)N[C@@H](C(C)C)C(=O)N[C@@H](C(C)C)C(=O)OCc2ccccc2)C(C)C)C(C)C</chem>                                                         | 5.08 | nM |
| CHEMBL418978 | <chem>CC(C)C1(CCc2ccc(O)cc2)CC(=O)C(=C(O)O1)Sc3cc(C)c(NC(=O)c4ccncc4)cc3C(C)(C)C</chem>                                                              | 5.1  | nM |
| CHEMBL432665 | <chem>CC(C)C1(CCc2ccc(O)cc2)CC(=O)C(=C(O)O1)Sc3cc(C)c(NC(=O)c4ccncc4)cc3C(C)(C)C</chem>                                                              | 5.1  | nM |
| CHEMBL322285 | <chem>CN(C)C(=O)[C@@H](NC(=O)Cc1ccccc1)[C@@H]2N[C@@H](C(=O)NCCNC(=O)[C@@H]3N[C@H](SC3(C)C)[C@H](NC(=O)Cc4ccccc4)C(=O)N(C)C)C(C)C)S2</chem>           | 5.2  | nM |
| CHEMBL99016  | <chem>CC(C)C1(CCc2ccc(O)cc2)CC(=O)N[C@@H](Cc1ccccc1)[C@@H](O)C[C@@H](Cc2ccccc2)C(=O)N[C@@H](C3CCCC3)C(=O)N</chem>                                    | 5.2  | nM |
| CHEMBL169543 | <chem>CC(C)C1(CCc2ccc(O)cc2)CC(=O)C(=C(O)O1)Sc3cc(C)c(NS(=O)(=O)c4ccc(Cl)cc4)cc3C(C)(C)C</chem>                                                      | 5.3  | nM |
| CHEMBL111957 | <chem>CC(C)[C@@H](NC(=O)\C=C\C1CCcnc1)C(=O)N[C@@H](Cc2ccccc2)[C@H](O)[C@H](O)[C@H](Cc3ccccc3)NC(=O)[C@@H](NC(=O)\C=C\C4CCcnc4)C(C)C</chem>           | 5.3  | nM |
| CHEMBL94078  | <chem>CC(C)(C)OC(=O)N[C@H](C[C@H](O)[C@H](Cc1ccccc1)NC(=O)OC(C)(C)C)Cc2ccccc2</chem>                                                                 | 5.3  | nM |
| CHEMBL93323  | <chem>CC(C)(C)OC(=O)N[C@H](C[C@H](O)[C@H](Cc1ccccc1)NC(=O)c2ccc(N)c2Cl)Cc3ccccc3</chem>                                                              | 5.3  | nM |
| CHEMBL91610  | <chem>CC(C)[C@@H]1[C@@H](CCS1(=O)=O)OC(=O)N[C@@H](Cc2ccccc2)[C@H](O)CN3CCN(C[C@H]3C(=O)NC(C)(C)C)C4Cc5ccccc5C4</chem>                                | 5.3  | nM |
| CHEMBL429036 | <chem>CC(C)(C)NC(=O)c1ccccc1C[C@@H](O)[C@H](Cc2ccccc2)NC(=O)[C@H](CC(=O)OCc3ccccc3)NS(=O)(=O)C</chem>                                                | 5.4  | nM |
| CHEMBL55586  | <chem>CC(C)[C@@H]1[C@@H](CCS1(=O)=O)OC(=O)N[C@@H](Cc2ccccc2)[C@H](O)CN3CCN(Cc4cc(C)nc(Cl)c4)C[C@H]3C(=O)NC(C)(C)C</chem>                             | 5.4  | nM |
| CHEMBL319400 | <chem>CCNC(=O)[C@@H](NC(=O)c1c(C)onc1c2ccccc2)[C@@H]3N[C@@H](C(=O)NCCNC(=O)C4N[C@H](SC4(C)C)[C@H](NC(=O)c5c(C)onc5c6ccccc6)C(=O)NCC)C(C)(C)S3</chem> | 5.4  | nM |
| CHEMBL315253 | <chem>NC(=O)CC(NC(=O)c1ccc2ccccc2n1)C(=O)N[C@@H](Cc3ccccc3)[C@H](O)CN[C@@H](Cc4ccccc4)C(=O)NC5[C@H](O)Cc6ccccc56</chem>                              | 5.4  | nM |
| CHEMBL274912 | <chem>CC(C)[C@H](NC(=O)[C@H](Cc1ccccc1)CS(=O)(=O)C(C)(C)C)C(=O)NCP(=O)(N)CNC(=O)[C@@H](NC(=O)[C@H](Cc3cccc4ccccc34)CS(=O)(=O)C(C)(C)C)C(C)C</chem>   | 5.5  | nM |
| CHEMBL305466 | <chem>CC(C)[C@@H]1NC(=O)c2cc3ccccc3cc2OCCCOc4ccc(C[C@H](NC1=O)[C@H](O)CN5CC6CCCC6C[C@H]5C(=O)NC(C)(C)C)cc4</chem>                                    | 5.5  | nM |
| CHEMBL314753 | <chem>O[C@@H](C[C@H](Cc1ccccc1)NC(=O)OCc2ccccc2)[C@H](Cc3ccccc3)NC(=O)OCc4ccccc4</chem>                                                              | 5.6  | nM |
| CHEMBL300812 | <chem>O[C@@H](C[C@H]1(Cc2ccccc2)N=CC(=C1O)C3CNC(=O)c4ccccc34)[C@H](Cc5ccccc5)NC(=O)O[C@H]6CCOC6</chem>                                               | 5.7  | nM |
| CHEMBL267092 | <chem>CC(C)(C)NC(=O)c1ccccc1C[C@@H](O)[C@H](Cc2ccccc2)NC(=O)[C@H](CS(=O)(=O)c3ccccc3)NS(=O)(=O)C</chem>                                              | 5.7  | nM |
| CHEMBL17788  | <chem>CC(C)[C@@H]1[C@@H](CCS1(=O)=O)OC(=O)N[C@@H](Cc2ccccc2)[C@H](O)CN3C[C@H]4CCC[C@H]4C[C@H]3C(=O)NC(C)(C)C</chem>                                  | 5.74 | nM |
| CHEMBL319013 | <chem>CC(C)(C)OC(=O)N[C@@H](Cc1ccccc1)[C@@H](O)C[C@@H](Cc2ccccc2)C(=O)N[C@H](C(=O)NCc3ccccc3)c4ccccc4</chem>                                         | 5.8  | nM |
| CHEMBL77819  | <chem>CC(C)c1scnc1CCC2(CC(=O)C(=C(O)O2)Sc3cc(C)c(CO)cc3C(C)(C)C)C(C)C</chem>                                                                         | 5.8  | nM |
| CHEMBL344233 | <chem>COc1ccc(cc1)S(=O)(=O)N(CC(C)C)C[C@@H](O)[C@H](Cc2ccccc2)NC(=O)c3ccccc3Cl</chem>                                                                | 6    | nM |
| CHEMBL99081  | <chem>CC(=O)N[C@H](CSCc1ccccc1)C(=O)N[C@@H](Cc2ccccc2)[C@H](O)CN3C[C@H]4CCCC[C@H]4C[C@H]3C(=O)NC(C)(C)C</chem>                                       | 6    | nM |
| CHEMBL342367 | <chem>COc1ccc(cc1)S(=O)(=O)N(CC(C)C)C[C@@H](O)[C@H](Cc2ccccc2)NC(=O)c3ccccc3N)c3C</chem>                                                             | 6    | nM |

|               |                                                                                                                                                                                           |      |    |
|---------------|-------------------------------------------------------------------------------------------------------------------------------------------------------------------------------------------|------|----|
| CHEMBL430445  | <chem>CC(C)(C)OC(=O)N[C@@H](Cc1ccccc1)[C@@H](O)C[C@]2(Cc3ccc(O)cc3)N=CC(=C2O)C4[C@H](O)Cc5ccccc45</chem>                                                                                  | 6    | nM |
| CHEMBL3143353 | <chem>CC(C)C[C@H](NC(=O)[C@@H](C[C@H](O)[C@H](Cc1ccccc1)NC(=O)CC(C)(C)Cc2ccccc2)C(=O)N[C@@H](Cc3ccccc3)C(=O)N</chem>                                                                      | 6    | nM |
| CHEMBL74166   | <chem>CC(C)[C@H](NC(=O)[C@H](Cc1ccc(O)cc1)NC(=O)C)C(=O)N[C@@H](Cc2ccccc2)[C@@H](O)C(=O)N[C@H]3Cc4ccc(OCCCNC(=O)[C@@H](NC3=O)C(C)C)cc4</chem>                                              | 6    | nM |
| CHEMBL58406   | <chem>CC(C)(C)NS(=O)(=O)c1ccccc1C[C@@H](O)C[C@@H](Cc2ccccc2)C(=O)N[C@@H]3[C@H](O)Cc4ccccc34</chem>                                                                                        | 6    | nM |
| CHEMBL305463  | <chem>CCCCCCC(=O)N[C@@H](C(C)C)C(=O)N[C@@H](Cc1ccccc1)[C@H](O)CN2CC3CCCCC3[C@H]2C(=O)NC(C)(C)C</chem>                                                                                     | 6    | nM |
| CHEMBL45953   | <chem>CC(C)C[C@H](NC(=O)[C@H](C)C[C@H](O)[C@H](Cc1ccccc1)NC(=O)OC(C)(C)C(=O)N[C@@H](Cc2ccccc2)C(=O)N</chem>                                                                               | 6    | nM |
| CHEMBL91657   | <chem>Nc1ccc(C(=O)N[C@H](C[C@H](O)[C@H](Cc2ccccc2)NC(=O)OCc3ccccc3)Cc4ccccc4)c(Cl)c1</chem>                                                                                               | 6.1  | nM |
| CHEMBL333610  | <chem>CCN1CCN(C[C@@H](O)C[C@@H](Cc2ccccc2)C(=O)NC3[C@H](O)Cc4ccccc34)[C@@H](C1)C(=O)NC(C)(C)C</chem>                                                                                      | 6.1  | nM |
| CHEMBL38236   | <chem>CC(C)C1(CCc2ccc(O)cc2)CC(=O)C(=C(O)O1)Sc3cc(C)c(NC(=O)c4cccn4)cc3C(C)(C)C</chem>                                                                                                    | 6.1  | nM |
| CHEMBL347662  | <chem>Cc1ccc(cc1C(=O)N[C@@H](Cc2ccccc2)[C@H](O)Cc3ccccc3C(=O)NC(C)(C)C)C(=O)N4CCc5ccccc5C4</chem>                                                                                         | 6.1  | nM |
| CHEMBL434190  | <chem>COc1cc(CN2[C@H](Cc3ccccc3)[C@H](O)CN(N(Cc4ccc(O)c(OC)c4)C2=O)C(=O)CN5CCNCC5)ccc1O</chem>                                                                                            | 6.1  | nM |
| CHEMBL308889  | <chem>CCCNS(=O)(=O)Oc1cc(c(SC2=C(O)OC(C)(CCc3ccc(O)cc3)CC2=O)cc1C)C(C)(C)C</chem>                                                                                                         | 6.2  | nM |
| CHEMBL98229   | <chem>CCN(CC)CC(O)CNC(=O)[C@@H](NC(=O)[C@@H](C[C@H](O)[C@H](Cc1ccccc1)NC(=O)OC(C)(C)C)Cc2ccccc2)C(C)C</chem>                                                                              | 6.3  | nM |
| CHEMBL169871  | <chem>Cc1cc(SC2=C(O)OC(C)(CCc3ccc(O)cc3)CC2=O)c(cc1NS(=O)(=O)c4ccc(cc4)c5cccs5)C(C)(C)C</chem>                                                                                            | 6.3  | nM |
| CHEMBL333211  | <chem>Cc1cc(SC2=C(O)OC(C)(CCc3ccc(O)cc3)CC2=O)c(cc1OC(CO)C(C)(C)C</chem>                                                                                                                  | 6.4  | nM |
| CHEMBL37668   | <chem>Cc1cc(SC2=C(O)OC(C)(CCc3ccc(O)cc3)CC2=O)c(cc1O)C(C)(C)C</chem>                                                                                                                      | 6.5  | nM |
| CHEMBL2374444 | <chem>COC(=O)N(C)[C@H](Cc1ccccc1)C(=O)NCCCC[C@@H](CO)N(CC(C)C)S(=O)(=O)c2ccc(N)cc2</chem>                                                                                                 | 6.5  | nM |
| CHEMBL407999  | <chem>CC(C)[C@H](NC(=O)[C@H](Cc1ccccc2ccccc12)CS(=O)(=O)C(C)(C)C)C(=O)N[C@H](Cc3ccccc3)P(=O)(O)[C@@H](Cc4ccccc4)NC(=O)[C@@H](NC(=O)[C@H](Cc5ccccc6ccccc56)CS(=O)(=O)C(C)(C)C)C(C)C</chem> | 6.52 | nM |
| CHEMBL99875   | <chem>CC(C)(C)NC(=O)[C@@H]1C[C@@H]2SCC[C@@H]2CN1C[C@@H](O)[C@H](Cc3ccccc3)NC(=O)OCc4ccccc4</chem>                                                                                         | 6.6  | nM |
| CHEMBL331412  | <chem>Cc1cc(SC2=C(O)OC(C)(CCc3ccccc3)(CC2=O)c4ccccc4)c(cc1CO)C(C)(C)C</chem>                                                                                                              | 6.6  | nM |
| CHEMBL149053  | <chem>CC1=CSC2C(CN3CCN(C[C@@H](O)C[C@@H](Cc4ccccc4)C(=O)NC5[C@H](O)Cc6ccccc56)[C@@H](C3)C(=O)NC(C)(C)C)N=CN12</chem>                                                                      | 6.7  | nM |
| CHEMBL354615  | <chem>CC(C)C1(CCc2ccccc2)CC(=O)C(=C(O)O1)Sc3cc(C)c(OS(=O)(=O)c4cccncn4)cc3C(C)(C)C</chem>                                                                                                 | 6.7  | nM |
| CHEMBL151824  | <chem>Cn1cc(CN2CCN(C[C@@H](O)C[C@@H](Cc3ccccc3)C(=O)NC4[C@H](O)Cc5ccccc45)[C@@H](C2)C(=O)NC(C)(C)C)c6ccccc16</chem>                                                                       | 6.7  | nM |
| CHEMBL112186  | <chem>CC(C)[C@H](NC(=O)OCc1ccnc1)C(=O)N[C@@H](Cc2ccccc2)C(O)[C@H](Cc3ccccc3)NC(=O)[C@@H](NC(=O)OCc4ccccc4)C(C)C</chem>                                                                    | 6.8  | nM |
| CHEMBL333427  | <chem>Cc1cc(SC2=C(O)OC(C)(CCc3ccccc3)(CC2=O)c4ccccc4)c(cc1OCCO)C(C)(C)C</chem>                                                                                                            | 6.8  | nM |
| CHEMBL106748  | <chem>CC1(C)S[C@@H](N[C@H]1C(=O)NCCNC(=O)[C@@H]2N[C@H](SC2(C)C)[C@H](NC(=O)Cc3ccccc3)C(=O)N4CCCCC4)[C@H](NC(=O)Cc5ccccc5)C(=O)N6CCCCC6</chem>                                             | 6.9  | nM |
| CHEMBL272599  | <chem>Cc1cccc(C)c1OCC(=O)N[C@@H](Cc2ccccc2)[C@H](O)CN3CC[C@H](C[C@H]3C(=O)NC(C)(C)C)OCc4ccncc4</chem>                                                                                     | 7    | nM |

|               |                                                                                                                                                                 |      |    |
|---------------|-----------------------------------------------------------------------------------------------------------------------------------------------------------------|------|----|
| CHEMBL108960  | <chem>CC(C)(C)OC(=O)N[C@@H](Cc1ccccc1)[C@@H](O)C[C@@](C)(Cc2ccccc2)C(=O)N[C@@H]3[C@H](O)Cc4ccccc34</chem>                                                       | 7    | nM |
| CHEMBL70388   | <chem>CC(C)[C@H](NC(=O)[C@H](Cc1ccccc1)NC(=O)C)C(=O)N[C@@H](Cc2ccccc2)[C@@H](O)C(=O)N[C@H]3Cc4ccc(OCCCNC(=O)[C@@H](NC3=O)C(C)C)cc4</chem>                       | 7    | nM |
| CHEMBL94266   | <chem>C[C@H](NC(=O)[C@@H](C[C@H](O)[C@H](Cc1ccccc1)NC(=O)OC(C)(C)C)Cc2ccccc2)C(=O)N</chem>                                                                      | 7    | nM |
| CHEMBL70502   | <chem>CN1CCN(CC1)S(=O)(=O)Oc2cc(c(SC3=C(O)OC(C)(CCc4ccc(O)cc4)CC3=O)cc2C)C(C)(C)C</chem>                                                                        | 7.1  | nM |
| CHEMBL419580  | <chem>CC(C)[C@@H](NC(=O)C1Cc2ccccc2CN1)C(=O)N[C@@H](Cc3ccccc3)C(O)[C@H](Cc4ccccc4)NC(=O)[C@@H](NC(=O)C5Cc6ccccc6CN5)C(C)C</chem>                                | 7.1  | nM |
| CHEMBL97362   | <chem>CCC(C)[C@H](NC(=O)[C@@H](C[C@H](O)[C@H](Cc1ccccc1)NC(=O)OC(C)(C)C)Cc2ccccc2)C(=O)NCCN(C)C</chem>                                                          | 7.1  | nM |
| CHEMBL105880  | <chem>CC1(C)S[C@@H](N[C@H]1C(=O)NCCNC(=O)[C@@H]2N[C@H](SC2(C)C)[C@H](NC(=O)Cc3ccccc3)C(=O)NCc4ccc(Cl)cc4)[C@H](NC(=O)Cc5ccccc5)C(=O)NCc6ccc(Cl)cc6</chem>       | 7.5  | nM |
| CHEMBL112846  | <chem>CC(C)[C@@H](NC(=O)CN1CCOCC1)C(=O)N[C@@H](Cc2ccccc2)[C@H](O)[C@H](O)[C@H](Cc3ccccc3)NC(=O)[C@@H](NC(=O)CN4CCOCC4)C(C)C</chem>                              | 7.5  | nM |
| CHEMBL441065  | <chem>COc1cc(ccc1N)C(=O)N[C@@H](Cc2ccccc2)[C@@H](O)C[C@H](Cc3ccccc3)NC(=O)OC(C)(C)C</chem>                                                                      | 7.5  | nM |
| CHEMBL439366  | <chem>CC1(C)S[C@@H](N[C@H]1C(=O)NCCNC(=O)[C@@H]2N[C@H](SC2(C)C)[C@H](NC(=O)c3ccccc3c4ccccc4)C(=O)NCc5ccccc5)[C@H](NC(=O)c6ccccc6c7ccccc7)C(=O)NCc8ccccc8</chem> | 7.5  | nM |
| CHEMBL38269   | <chem>CC(C)C1(CCc2ccc(N)cc2)CC(=O)C(=C(O)O1)Sc3cc(C)c(N)cc3C(C)(C)C</chem>                                                                                      | 7.5  | nM |
| CHEMBL90139   | <chem>CC(C)(C)OC(=O)N[C@H](C[C@H](O)[C@H](Cc1ccccc1)NC(=O)c2cc(O)c(N)c2)Cc3ccccc3</chem>                                                                        | 7.6  | nM |
| CHEMBL347500  | <chem>CC(C)(C)NC(=O)[C@@H]1CN(CC2(CC2)c3ccccc3)CCN1C[C@@H](O)C[C@@H](Cc4ccccc4)C(=O)NC5[C@H](O)Cc6ccccc56</chem>                                                | 7.7  | nM |
| CHEMBL36448   | <chem>CCCCC1(CCc2ccc(O)cc2)CC(=O)C(=C(O)O1)Sc3cc(C)c(N)cc3C(C)(C)C</chem>                                                                                       | 7.7  | nM |
| CHEMBL2092982 | <chem>CC(C)(C)OC(=O)N[C@@H](Cc1ccccc1)[C@@H](O)C[C@@H](Cc2ccccc2)C(=O)N[C@@H]3[C@@H](O)Cc4ccccc34</chem>                                                        | 7.72 | nM |
| CHEMBL113825  | <chem>CC(C)(C)NC(=O)[C@@H]1CC2CCCC2CN1C[C@@H](O)C[C@@H](Cc3ccccc3)C(=O)NC4[C@H](O)Cc5ccccc45</chem>                                                             | 7.8  | nM |
| CHEMBL318700  | <chem>CCC(C)[C@H](NC(=O)[C@@H](C[C@H](O)[C@H](Cc1ccccc1)NC(=O)OC(C)(C)C)Cc2ccccc2)C(=O)NCCN(C)C</chem>                                                          | 7.9  | nM |
| CHEMBL370853  | <chem>COc1cc(CN2[C@H](Cc3ccccc3)[C@H](O)CN(N(Cc4ccc(O)c(OC)c4)C2=O)C(=O)CN5CCCC5)ccc1O</chem>                                                                   | 7.9  | nM |
| CHEMBL306897  | <chem>CC(C)[C@@H]1NC(=O)c2ccccc2OCCCOc3ccc(C[C@H](NC1=O)[C@H](O)CN4CC5CCCC5C[C@H]4C(=O)NC(C)(C)C)cc3</chem>                                                     | 8    | nM |
| CHEMBL407052  | <chem>CC(C)(C)NC(=O)c1ccccc1C[C@@H](O)[C@H](Cc2ccccc2)NC(=O)[C@H](CC(=O)NCc3ccc4ccccc4n3)NS(=O)(=O)C</chem>                                                     | 8    | nM |
| CHEMBL169490  | <chem>Cc1cc(SC2=C(O)OC(CCc3ccc(O)cc3)(CC2=O)C4CCCCC4)c(cc1OS(=O)(=O)Cn5ccnc5)C(C)(C)C</chem>                                                                    | 8    | nM |
| CHEMBL1790510 | <chem>CCC(CC)NC(=O)C[C@@H](C(=O)NC[C@@H](O)[C@H](Cc1ccccc1)NC(=O)[C@@H](NC(=O)OCc2ccccc2)[C@H](C)O)C(C)(C)C</chem>                                              | 8.2  | nM |
| CHEMBL328233  | <chem>CC(C)[C@@H]1[C@@H](CCS1(=O)=O)OC(=O)N[C@@H](Cc2ccccc2)[C@H](O)CN3CCN(C[C@H]3C(=O)NC(C)(C)C)C4CCSC4</chem>                                                 | 8.3  | nM |
| CHEMBL330915  | <chem>CC(C)[C@@H](NC(=O)N1CCN(Cc2ccccc2)CC1)C(=O)N[C@@H](Cc3ccccc3)[C@@H](O)[C@@H](O)[C@H](Cc4ccccc4)NC(=O)[C@@H](NC(=O)N5CCN(Cc6ccccc6)CC5)C(C)C</chem>        | 8.38 | nM |
| CHEMBL12900   | <chem>Cc1cccc(C)c1OCC(=O)N[C@@H](Cc2ccccc2)[C@H](O)CN3C[C@H]4CCCC[C@H]4C[C@H]3C(=O)NC(C)(C)C</chem>                                                             | 8.4  | nM |
| CHEMBL327194  | <chem>CCCCCCCCN1CCN(C[C@@H](O)[C@H](Cc2ccccc2)NC(=O)O[C@</chem>                                                                                                 | 8.4  | nM |

|               |                                                                                                                                                                              |      |    |
|---------------|------------------------------------------------------------------------------------------------------------------------------------------------------------------------------|------|----|
| CHEMBL17600   | <chem>@H]3CCS(=O)(=O)[C@@H]3C(C)C[C@@H](C1)C(=O)NC(C)(C)C<br/>CC[C@H]1[C@H](CCS1(=O)=O)OC(=O)N[C@@H](Cc2ccccc2)[C@<br/>H](O)CN3C[C@H]4CCCC[C@H]4C[C@H]3C(=O)NC(C)(C)C</chem> | 8.41 | nM |
| CHEMBL323203  | <chem>COC(=O)N[C@@H](C(C)C)C(=O)N[C@@H](Cc1ccccc1)[C@H](O)C<br/>N(CC2CCCCC2)NC(=O)[C@@H](NC(=O)C)C(C)C</chem>                                                                | 8.5  | nM |
| CHEMBL275123  | <chem>CC(C)[C@H](NC(=O)[C@H](Cc1cccc2ccccc12)CS(=O)(=O)C(C)(C)C<br/>)C(=O)NCP(=O)(CNC(=O)[C@@H](NC(=O)[C@H](Cc3cccc4ccccc34<br/>)CS(=O)(=O)C(C)(C)C)C(C)C)NN</chem>          | 8.5  | nM |
| CHEMBL163243  | <chem>CN(Cc1cccn1)C(=O)c2ccc(C)c(c2)C(=O)N[C@@H](Cc3ccccc3)[C@<br/>H](O)CN4C[C@H]5CCCC[C@H]5C[C@H]4C(=O)NC(C)(C)C</chem>                                                     | 8.6  | nM |
| CHEMBL169278  | <chem>Cc1cc(SC2=C(O)OC(Cc3ccc(O)cc3)(CC2=O)C4CCCC4)c(cc1NS(=O<br/>)=O)c5ccccc5)C(C)(C)C</chem>                                                                               | 8.6  | nM |
| CHEMBL104683  | <chem>CCNC(=O)[C@@H](NC(=O)CC(C)C)[C@@H]1N[C@@H](C(=O)NC<br/>CNC(=O)[C@@H]2N[C@H](SC2(C)C)[C@H](NC(=O)CC(C)C)C(=O<br/>)NCC)C(C)(C)S1</chem>                                  | 8.7  | nM |
| CHEMBL354803  | <chem>CC(C)C1(CCc2ccc(O)cc2)CC(=O)C(=C(O)O1)Sc3cc(C)c(NS(=O)(=O)<br/>c4cccs4)cc3C(C)(C)C</chem>                                                                              | 8.7  | nM |
| CHEMBL67867   | <chem>CCNS(=O)(=O)Oc1cc(c(SC2=C(O)OC(Cc3ccccc3)(CC2=O)C(C)C)cc<br/>1C)C(C)(C)C</chem>                                                                                        | 8.9  | nM |
| CHEMBL414648  | <chem>CC(C)[C@H]1SCC[C@H]1OC(=O)N[C@@H](Cc2ccccc2)[C@H](O)<br/>CN3C[C@H]4CCCC[C@H]4C[C@H]3C(=O)NC(C)(C)C</chem>                                                              | 9    | nM |
| CHEMBL112412  | <chem>CC(C)[C@@H](NC(=O)OCc1ccccc1)C(=O)N[C@@H](Cc2ccccc2)[C<br/>@H](O)[C@H](Cc3ccccc3)NC(=O)[C@@H](NC(=O)OCCN4CCOCC<br/>4)C(C)C</chem>                                      | 9    | nM |
| CHEMBL94797   | <chem>CC(C)[C@H](NC(=O)C)C(=O)N[C@@H](Cc1ccccc1)[C@@H](O)CN<br/>(CC2CCCCC2)NC(=O)[C@@H](NC(=O)C)C(C)C</chem>                                                                 | 9    | nM |
| CHEMBL3350608 | <chem>CC(C)C[C@H](NC(=O)[C@H](Cc1ccccc1)CP(=O)(O)[C@H](Cc2cccc<br/>c2)NC(=O)OC(C)(C)C)C(=O)N[C@@H](Cc3ccccc3)C(=O)N</chem>                                                   | 9    | nM |
| CHEMBL169037  | <chem>CC(C)C1(CCc2ccccc2)CC(=O)C(=C(O)O1)Sc3cc(C)c(NS(=O)(=O)c4c<br/>cc(cc4)C#N)cc3C(C)(C)C</chem>                                                                           | 9.1  | nM |
| CHEMBL155588  | <chem>CC(C)c1nc(CN(C2CC2)C(=O)NC(C)C(=O)N[C@@H](Cc3ccccc3)[C<br/>@@H](O)C[C@H](Cc4ccccc4)NC(=O)OCe5cncs5)cs1</chem>                                                          | 9.4  | nM |
| CHEMBL342037  | <chem>COc1ccc(cc1)S(=O)(=O)N(CC(C)C)C[C@@H](O)[C@H](Cc2ccccc2)<br/>NC(=O)c3ccc(N)cc3C</chem>                                                                                 | 9.49 | nM |
| CHEMBL90699   | <chem>CC(C)(C)OC(=O)N[C@H](C[C@H](O)[C@H](Cc1ccccc1)NC(=O)c2c<br/>cc(N)c(N)c2)Cc3ccccc3</chem>                                                                               | 9.6  | nM |
| CHEMBL103783  | <chem>CC(C)[C@H](NC(=O)CC1NC(=O)NC1=O)C(=O)N[C@@H](Cc2cccc<br/>c2)[C@@H](O)[C@H](O)[C@H](Cc3ccccc3)NC(=O)[C@@H](NC(=O<br/>)CC4NC(=O)NC4=O)C(C)C</chem>                       | 9.6  | nM |
| CHEMBL354216  | <chem>CC(C)C1(CCc2ccc(O)cc2)CC(=O)C(=C(O)O1)Sc3cc(C)c(OS(=O)(=O)<br/>c4ccc(F)cc4)cc3C(C)(C)C</chem>                                                                          | 9.6  | nM |
| CHEMBL354173  | <chem>Cc1cc(SC2=C(O)OC(C)(CCc3ccc(O)cc3)CC2=O)c(cc1NS(=O)(=O)C)<br/>C(C)(C)C</chem>                                                                                          | 9.7  | nM |
| CHEMBL71662   | <chem>CN1CCN(CC1)S(=O)(=O)Oc2cc(c(SC3=C(O)OC(Cc4ccc(O)cc4)(CC<br/>3=O)C5CCCCC5)cc2C)C(C)(C)C</chem>                                                                          | 9.7  | nM |
| CHEMBL172622  | <chem>Cc1cc(SC2=C(O)OC(C)(CCc3ccc(O)cc3)CC2=O)c(cc1OS(=O)(=O)c4c<br/>cccc4)C(C)(C)C</chem>                                                                                   | 9.8  | nM |
| CHEMBL405969  | <chem>CC(C)(C)NC(=O)[C@@H]1C[C@@H]2CCCC[C@@H]2CN1C[C@H<br/>(O)[C@H](Cc3ccccc3)NC(=O)[C@H](CC(=O)N)NC(=O)c4ccc5ccccc<br/>5n4</chem>                                           | 9.83 | nM |
| CHEMBL107748  | <chem>CCNC(=O)[C@@H](NC(=O)c1ccccc1c2ccccc2)[C@@H]3N[C@@H](<br/>C(=O)NCCNC(=O)[C@@H]4N[C@H](SC4(C)C)[C@H](NC(=O)c5cc<br/>ccc5c6ccccc6)C(=O)NCC)C(C)(C)S3</chem>              | 9.9  | nM |
| CHEMBL121995  | <chem>CCC(C)c1ccccc1SC2=C(O)OC(Cc3ccccc3)(CC2=O)c4ccccc4</chem>                                                                                                              | 10   | nM |
| CHEMBL343108  | <chem>CCc1ccccc1C(=O)N[C@@H](Cc2ccccc2)[C@H](O)CN(CC(C)C)S(=O<br/>)=O)c3ccc(OC)cc3</chem>                                                                                    | 10   | nM |
| CHEMBL70140   | <chem>CC(C)C[C@]1(N=CC(=C1O)[C@@H](Cc2ccccc2)C(=O)N)C3=C(O)[</chem>                                                                                                          | 10   | nM |

|               |                                                                                                                                                        |       |    |
|---------------|--------------------------------------------------------------------------------------------------------------------------------------------------------|-------|----|
|               | <chem>C@@](C[C@H](O)[C@H](Cc4ccccc4)NC(=O)OC(C)(C)C)(Cc5ccccc5)N=C3</chem>                                                                             |       |    |
| CHEMBL430863  | <chem>CC(C)CN(C[C@@H](O)[C@H](Cc1ccccc1)NC(=O)[C@@H](CS(=O)(=O)c2ccc(F)cc2)NS(=O)(=O)C)C(=O)NC(C)(C)C</chem>                                           | 10    | nM |
| CHEMBL114192  | <chem>CC(C)[C@@H](NC(=O)NCc1cccn1)C(=O)N[C@@H](Cc2ccccc2)C(O)[C@H](Cc3ccccc3)NC(=O)[C@@H](NC(=O)NCc4cccn4)C(C)C</chem>                                 | 10    | nM |
| CHEMBL302958  | <chem>CC(C)[C@H](NC(=O)[C@H](Cc1c[nH]c2ccccc12)NC(=O)C)C(=O)N[C@@H](Cc3ccccc3)[C@@H](O)C(=O)N[C@H]4Cc5ccc(OCCNC(=O)[C@@H](NC4=O)C(C)C)cc5</chem>       | 10    | nM |
| CHEMBL317204  | <chem>CC(C)CN(C[C@H](O)[C@H](Cc1ccccc1)NC(=O)[C@@H](NC(=O)OCc3ccccc3)C(C)C</chem>                                                                      | 10    | nM |
| CHEMBL431534  | <chem>CC(C)C[C@]1(N=CC(=C1O)[C@@H](Cc2ccccc2)C(=O)N)C3=C(O)[C@@](C[C@H](O)[C@@H](CC(=O)OC(C)(C)C)Cc4ccccc4)(Cc5ccccc5)N=C3</chem>                      | 10    | nM |
| CHEMBL354502  | <chem>OCc1ccc(CN2[C@H](COc3ccccc3)[C@H](O)[C@@H](O)[C@@H](COc4ccccc4)N(Cc5ccc(CO)cc5)C2=O)cc1</chem>                                                   | 10    | nM |
| CHEMBL288163  | <chem>CC(C)[C@H](NC(=O)[C@@H](CC(O)C[C@@H](Cc1ccccc1)C(=O)N[C@@H](C(C)C)C(=O)NCc2nc3ccccc3[nH]2)Cc4ccccc4)C(=O)NCc5nc6ccccc6[nH]5</chem>               | 10    | nM |
| CHEMBL70787   | <chem>CC(C)(C)NC(=O)[C@@H]1CC2CCCC2CN1C[C@@H](O)[C@@H]3Cc4ccc(OCCCOc5ccc6ccccc6cc5C(=O)N[C@@H](CC(=O)N)C(=O)N3)cc4</chem>                              | 10    | nM |
| CHEMBL290900  | <chem>COC(=O)[C@H](Cc1ccccc1)NC(=O)[C@@H](NC(=O)[C@@H](CC(O)C[C@@H](Cc2ccccc2)C(=O)N[C@@H](C(C)C)C(=O)N[C@@H](Cc3ccccc3)C(=O)OC)Cc4ccccc4)C(C)C</chem> | 10    | nM |
| CHEMBL71961   | <chem>C[C@@H](N[C@@H](C(C)C)C(=O)N[C@@H](Cc1ccccc1)[C@@H](O)C(=O)N[C@H]2Cc3ccc(OCCNC(=O)[C@@H](NC2=O)C(C)C)cc3)NC(=O)OCc4ccccc4</chem>                 | 10    | nM |
| CHEMBL347671  | <chem>CC(C)CCN(C[C@@H](O)[C@H](Cc1ccccc1)NC(=O)OCc2ccccc2)S(=O)(=O)c3ccc(Cl)cc3</chem>                                                                 | 10    | nM |
| CHEMBL99878   | <chem>CC(C)(C)NC(=O)[C@@H]1C[C@@H]2SCC[C@@H]2CN1C[C@@H](O)[C@H](CSc3ccccc3)NC(=O)[C@@H](CS(=O)(=O)c4ccc(F)cc4)NC(=O)C(F)(F)F</chem>                    | 10    | nM |
| CHEMBL353812  | <chem>CC(C)C1(CCc2ccc(O)cc2)CC(=O)C(=C(O)O1)Sc3cc(C)c(OS(=O)(=O)c4ccccc4)cc3C(C)(C)C</chem>                                                            | 10.4  | nM |
| CHEMBL191849  | <chem>COc1cc(ccc1N)C(=O)N[C@H](C[C@H](O)[C@H](Cc2ccccc2)NC(=O)OCc3ccccc3)Cc4ccccc4</chem>                                                              | 10.5  | nM |
| CHEMBL2115250 | <chem>CC(C)(C)NC(=O)[C@@H]1CCCC[C@@H]1C[C@@H](O)[C@H](Cc2ccccc2)NC(=O)[C@H](CC(=O)N)NC(=O)OCc3ccccc3</chem>                                            | 10.68 | nM |
| CHEMBL59522   | <chem>CC(C)(C)c1c(SC2=C(O)OC(CCc3ccccc3)(CC2=O)c4ccccc4)sc5ccccc15</chem>                                                                              | 10.91 | nM |
| CHEMBL88255   | <chem>CC(C)[C@@H](NC(=O)C)C(=O)N[C@H](C(C)C)C(=O)N[C@@H](Cc1ccccc1)C(O)[C@H](Cc2ccccc2)NC(=O)[C@@H](NC(=O)[C@@H](NC(=O)C)C(C)C)C(C)C</chem>            | 10.95 | nM |
| CHEMBL289799  | <chem>Cc1cc(SC2=C(O)OC(CCc3ccc(O)cc3)(CC2=O)C4CCCC4)c(cc1N)C(C)(C)C</chem>                                                                             | 10.95 | nM |
| CHEMBL37813   | <chem>Cc1cc(SC2=C(O)OC(CCc3ccccc3)(CC2=O)c4ccccc4)c(cc1N)C(C)(C)CC(C)(C)OC(=O)N[C@H](C[C@H](O)[C@H](Cc1ccccc1)NC(=O)c2ccc(N)c(O)c2)Cc3ccccc3</chem>    | 11    | nM |
| CHEMBL91443   | <chem>CC1(C)S[C@@H](N[C@H]1C(=O)NCCNC(=O)[C@@H]2N[C@H](SC2(C)C)[C@H](NC(=O)Cc3ccccc3)C(=O)NCc4cccn4)[C@H](NC(=O)Cc5ccccc5)C(=O)NCc6cccn6</chem>        | 11    | nM |
| CHEMBL105879  | <chem>CCCN(C(=O)[C@@H](NC(=O)Cc1ccccc1)[C@@H]2N[C@@H](C(=O)N(C)CCN(C)C(=O)[C@@H]3N[C@H](SC3(C)C)[C@H](NC(=O)Cc4ccccc4)C(=O)NCC)C(C)(C)S2</chem>        | 11    | nM |
| CHEMBL150003  | <chem>CC(C)C1(CCc2ccc(O)cc2)CC(=O)C(=C(O)O1)Sc3cc(C)c(cc3C(C)(C)C)N(C)C</chem>                                                                         | 11    | nM |
| CHEMBL35088   | <chem>CC(C)C1(CCc2ccc(O)cc2)CC(=O)C(=C(O)O1)Sc3cc(C)c(cc3C(C)(C)C)N(C)C</chem>                                                                         | 11    | nM |

|               |                                                                                                                                    |       |    |
|---------------|------------------------------------------------------------------------------------------------------------------------------------|-------|----|
| CHEMBL17494   | CCC[C@H]1[C@H](CCS1(=O)=O)OC(=O)N[C@@H](Cc2ccccc2)[C@H](O)CN3C[C@H]4CCCC[C@H]4C[C@H]3C(=O)NC(C)(C)C                                | 11.16 | nM |
| CHEMBL37755   | Cc1cc(SC2=C(O)OC(C)(CCc3ccc(O)cc3)CC2=O)c(cc1N)C(C)(C)C                                                                            | 11.17 | nM |
| CHEMBL112578  | CC(C)[C@@H](NS(=O)(=O)CCc1cncnc1)C(=O)N[C@@H](Cc2ccccc2)[C@H](O)[C@H](O)[C@H](Cc3ccccc3)NC(=O)[C@@H](NS(=O)(=O)CCc4cncnc4)C(C)C    | 11.7  | nM |
| CHEMBL278416  | CC(C)(C)NC(=O)[C@@H]1C[C@@H]2CCCC[C@@H]2CN1C[C@@H](O)[C@H](Cc3ccccc3)NC(=O)O[C@H]4CCS(=O)(=O)[C@H]4C5C                             | 11.84 | nM |
| CHEMBL291974  | CC(C)(C)OC(=O)N[C@@H](Cc1ccccc1)[C@@H](O)C[C@]2(Cc3ccccc3)N=CC(=C2O)C4[C@H](O)Cc5ccccc45                                           | 11.9  | nM |
| CHEMBL276431  | Cc1c(O)cccc1C(=O)N[C@@H](Cc2ccccc2)[C@H](O)CN3CC[C@H](C[C@H]3C(=O)NC(C)(C)C)OCc4cncnc4                                             | 12    | nM |
| CHEMBL331829  | CC(C)[C@@H](NC(=O)CCc1ccccc1)C(=O)N[C@@H](Cc2ccccc2)C(O)[C@H](Cc3ccccc3)NC(=O)[C@@H](NC(=O)CCc4ccccc4)C(C)C                        | 12    | nM |
| CHEMBL91601   | CC(C)(C)OC(=O)N[C@H](C[C@H](O)[C@H](Cc1ccccc1)NC(=O)c2c                                                                            | 12    | nM |
| CHEMBL331724  | c(O)ccc2Cl)Cc3ccccc3                                                                                                               | 12    | nM |
| CHEMBL119488  | Cc1ccc(c(SC2=C(O)OC(CC2=O)(c3ccccc3)c4ccccc4)c1)C(C)(C)C                                                                           | 12    | nM |
| CHEMBL119488  | Cc1ccc(c(SC2=C(O)OC(CCc3ccccc3)(CC2=O)c4ccc(OCCO)cc4)c1)C(C)(C)C                                                                   | 12    | nM |
| CHEMBL2374441 | COC(=O)N[C@H](Cc1ccccc1)C(=O)NCCCC[C@@H](CO)N(CC(C)C)S(=O)(=O)c2ccc(N)cc2                                                          | 12    | nM |
| CHEMBL321514  | CC(C)[C@H](NC(=O)Cc1csc(N)n1)C(=O)N[C@@H](Cc2ccccc2)[C@@H](O)[C@H](O)[C@H](Cc3ccccc3)NC(=O)[C@@H](NC(=O)Cc4csc(N)n4)C(C)C          | 12    | nM |
| CHEMBL36600   | CC(C)C1(CCc2ccc(O)cc2)CC(=O)C(=C(O)O1)Sc3cc(C)c(NC(=O)c4ccc(cc4)C(F)(F)F)cc3C(C)(C)C                                               | 12.1  | nM |
| CHEMBL263268  | Cc1cc(SC2=C(O)OC(C)(CCc3ccc(O)cc3)CC2=O)c(cc1NS(=O)(=O)c4ccc(cc4)C(F)(F)F)C(C)(C)C                                                 | 12.3  | nM |
| CHEMBL273827  | CC(C)(C)NC(=O)c1ccccc1C[C@@H](O)[C@H](Cc2ccccc2)NC(=O)[C@H](C[S+](I[O-])c3ccccc3)NS(=O)(=O)C                                       | 12.35 | nM |
| CHEMBL323955  | CC(C)[C@@H](NC(=O)N(C)CCc1ccccc1)C(=O)N[C@@H](Cc2ccccc2)[C@@H](O)[C@H](O)[C@H](Cc3ccccc3)NC(=O)[C@@H](NC(=O)N(C)CCc4ccccc4)C(C)C   | 12.7  | nM |
| CHEMBL72487   | CC(C)[C@@H]1[C@@H](CCS1(=O)=O)OC(=O)N[C@@H](Cc2ccccc2)[C@H](O)CN3CCN(Cc4cncnc4)C[C@H]3C(=O)NC(C)(C)C                               | 12.95 | nM |
| CHEMBL312909  | CCCC1(CCc2ccccc2)OC(=C(C(CC)c3ccccc3)NS(=O)(=O)c4ccc(N)cn4)c3)C(=O)O1)O                                                            | 13    | nM |
| CHEMBL430995  | CC(C)[C@@H]1NC(=O)[C@H](Cc2ccc(OCCCNC1=O)cc2)NC(=O)C(=O)C(Cc3ccccc3)NC(=O)OC(C)(C)C                                                | 13    | nM |
| CHEMBL99725   | CC(C)[C@H](NC(=O)c1sc(C)nc1C)C(=O)N[C@H](C[C@H](O)[C@H](Cc2ccccc2)NC(=O)[C@@H](NC(=O)c3sc(C)nc3)C(C)C)Cc4ccccc4                    | 13    | nM |
| CHEMBL90449   | CCCC1(CCc2ccccc2)OC(=C(C(CC)c3ccccc3)NS(=O)(=O)c4ccccc4)c3)C(=O)O1)O                                                               | 13    | nM |
| CHEMBL431754  | CC(C)(C)NC(=O)[C@@H]1CC2CCCC2CN1C[C@@H](O)[C@@H]3Cc4ccc(OCCO)c5cc6ccccc6cc5C(=O)N[C@@H](CC(=O)N)C(=O)N3)cc4                        | 13    | nM |
| CHEMBL113264  | CC(C)[C@@H](NC(=O)OCc1ccccc1)C(=O)N[C@@H](Cc2ccccc2)[C@H](O)[C@H](Cc3ccccc3)NC(=O)[C@@H](NC(=O)OCC4CCCN(C)C4)C(C)C                 | 13    | nM |
| CHEMBL77685   | CC(C)C1(CCc2csc(C)n2)CC(=O)C(=C(O)O1)Sc3cc(C)c(CO)cc3C(C)(C)C                                                                      | 13    | nM |
| CHEMBL100039  | CC(C)CCN(C[C@@H](O)[C@H](Cc1ccccc1)NC(=O)[C@H](CC(=O)N)NC(=O)OCc2ccccc2)C(=O)NC(C)(C)C                                             | 13    | nM |
| CHEMBL72129   | CC(C)[C@H](NC(=O)N[C@@H](C)S(=O)(=O)c1ccc(C)cc1)C(=O)N[C@@H](Cc2ccccc2)[C@@H](O)C(=O)N[C@H]3Cc4ccc(OCCNC(=O)[C@@H](NC3=O)C(C)C)cc4 | 13    | nM |

|               |                                                                                                                                                                         |       |    |
|---------------|-------------------------------------------------------------------------------------------------------------------------------------------------------------------------|-------|----|
| CHEMBL99607   | <chem>Cc1c(O)cccc1C(=O)N[C@@H](Cc2ccccc2)[C@H](O)CN3C[C@H]4C<br/>CCC[C@H]4C[C@H]3C(=O)NC(C)(C)C</chem>                                                                  | 13    | nM |
| CHEMBL321377  | <chem>CC[C@H](C)[C@H](NC(=O)[C@@H]1CCCN1C[C@H](O)[C@H](C<br/>c2ccccc2)NC(=O)[C@H](CC(=O)N)NC(=O)OCc3ccccc3)C(=O)N[C@<br/>@H](C(C)C)C(=O)OC</chem>                       | 13    | nM |
| CHEMBL35664   | <chem>CC(C)C1(CCc2ccc(O)cc2)CC(=O)C(=C(O)O1)Sc3cc(C)c(NC(=O)c4cc<br/>ccc4)cc3C(C)(C)C</chem>                                                                            | 13.2  | nM |
| CHEMBL249788  | <chem>CC(C)CC(NC(=O)[C@@H](C[C@H](O)[C@H](Cc1ccccc1)NC(=O)O<br/>C(C)(C)C)Cc2ccccc2)C(=O)NCCc3ccccc3</chem>                                                              | 13.42 | nM |
| CHEMBL113268  | <chem>CC(C)[C@@H](NC(=O)OCc1ccccc1)C(=O)N[C@@H](Cc2ccccc2)C(<br/>O)[C@H](Cc3ccccc3)NC(=O)[C@@H](NC(=O)OCc4ccccc4)C(C)C</chem>                                           | 13.49 | nM |
| CHEMBL287118  | <chem>CC(C)CC1(CCc2ccc(O)cc2)CC(=O)C(=C(O)O1)Sc3cc(C)c(N)cc3C(C)(<br/>C)C</chem>                                                                                        | 13.5  | nM |
| CHEMBL305063  | <chem>CC(C)[C@@H]1NC(=O)\C=C/CCCCOc2ccc(C[C@H](NC1=O)[C@<br/>H](O)CN3CC4CCCC4C[C@H]3C(=O)NC(C)(C)C)cc2</chem>                                                           | 13.51 | nM |
| CHEMBL91085   | <chem>CCCN1CCN(C[C@@H](O)[C@H](Cc2ccccc2)NC(=O)O[C@@H]3C<br/>CS(=O)(=O)[C@@H]3C(C)C)[C@@H](C1)C(=O)NC(C)(C)C</chem>                                                     | 13.7  | nM |
| CHEMBL82490   | <chem>CC(C)(N1CCN(C[C@@H](O)C[C@@H](Cc2ccccc2)C(=O)N[C@@H<br/>]3[C@H](O)COc4ccccc34)[C@@H](C1)C(=O)Nc5ccccc5)c6oc7ccccc<br/>7c6</chem>                                  | 13.8  | nM |
| CHEMBL3706748 | <chem>Cc1ccc(cc1C(=O)N[C@@H](Cc2ccccc2)[C@H](O)CN3C[C@H]4CCC<br/>C[C@H]4C[C@H]3C(=O)NC(C)(C)C)C(=O)N5CCc6ccccc6C5</chem>                                                | 13.8  | nM |
| CHEMBL354499  | <chem>CC(C)C1(CCc2ccccc2)CC(=O)C(=C(O)O1)Sc3cc(C)c(OS(=O)(=O)c4c<br/>cnc4)cc3C(C)(C)C</chem>                                                                            | 14    | nM |
| CHEMBL269252  | <chem>CC1(C)S[C@@H](N[C@H]1C(=O)NCCNC(=O)[C@@H]2N[C@H](S<br/>C2(C)C)[C@H](NC(=O)Cc3ccccc3)C(=O)NCc4ccc(Cl)cc4Cl)[C@H](<br/>NC(=O)Cc5ccccc5)C(=O)NCc6ccc(Cl)cc6Cl</chem> | 14    | nM |
| CHEMBL73308   | <chem>O[C@@H](CC[C@H](Cc1ccccc1)NC(=O)c2ccccc2NC(=O)OCc3ccccc<br/>3)[C@H](Cc4ccccc4)NC(=O)c5ccccc5NC(=O)OCc6ccccc6</chem>                                               | 14    | nM |
| CHEMBL307001  | <chem>CC(C)(C)[C@@H](CC(=O)Nc1ccccc1)C(=O)NC[C@@H](O)[C@H](<br/>Cc2ccccc2)NC(=O)OCc3ccccc3</chem>                                                                       | 14    | nM |
| CHEMBL308167  | <chem>CC(C)C1(CCc2ccccc2)CC(=O)C(=C(O)O1)Sc3cc(C)c(CO)cc3C(C)(<br/>C)C</chem>                                                                                           | 14    | nM |
| CHEMBL284341  | <chem>CC(C)C1(CCc2ccccc2)CC(=O)C(=C(O)O1)Sc3cc(C)c(NC(=O)c4ccc(cc<br/>4)C#N)cc3C(C)(C)C</chem>                                                                          | 14    | nM |
| CHEMBL121855  | <chem>CC(C)c1ccc(C(C)C)c(SC2=C(O)OC(CCc3ccccc3)(CC2=O)c4ccccc4)c1<br/>O[C@H](CN(CC1CCCC1)S(=O)(=O)c2ccccc2)[C@H](Cc3ccccc3)N</chem>                                     | 14    | nM |
| CHEMBL348282  | <chem>C(=O)OCc4ccccc4</chem>                                                                                                                                            | 14    | nM |
| CHEMBL78185   | <chem>CC(C)c1csc(CCC2(CC(=O)C(=C(O)O2)Sc3cc(C)c(CO)cc3C(C)(C)C<br/>(C)C)n1</chem>                                                                                       | 14    | nM |
| CHEMBL159378  | <chem>CC(C)(C)NC(=O)c1ccccc1C[C@@H](O)[C@H](CSc2ccccc2)NC(=O)[<br/>C@H](CC(=O)N)NC(=O)OCc3ccccc3</chem>                                                                 | 14    | nM |
| CHEMBL141046  | <chem>COc1ccc(cc1)S(=O)(=O)N(CC(C)C)C[C@@H](O)[C@H](Cc2ccccc2)<br/>NC(=O)c3ccccc3</chem>                                                                                | 14    | nM |
| CHEMBL112569  | <chem>CC(C)[C@@H](NC(=O)OCc1ccccc1)C(=O)N[C@@H](Cc2ccccc2)[C<br/>@H](O)[C@H](Cc3ccccc3)NC(=O)[C@@H](NC(=O)OCCN4CCCC4)<br/>C(C)C</chem>                                  | 14    | nM |
| CHEMBL146361  | <chem>C[C@H]1CC[C@@H](O)[C@H]1N2CC[C@H](C[C@H](O)[C@H](<br/>Cc3ccccc3)NC(=O)OC(C)(C)C)(Cc4ccccc4)C2=O</chem>                                                            | 14    | nM |
| CHEMBL139444  | <chem>COc1ccc(cc1)S(=O)(=O)N(CC(C)C)C[C@@H](O)[C@H](Cc2ccccc2)<br/>NC(=O)c3ccc(O)cc3C</chem>                                                                            | 14.14 | nM |
| CHEMBL430153  | <chem>CC(C)(C)NC(=O)c1ccccc1C[C@@H](O)[C@H](Cc2ccccc2)NC(=O)[C<br/>@H](CSc3ccccc3)NS(=O)(=O)C</chem>                                                                    | 14.7  | nM |
| CHEMBL276203  | <chem>CC(=O)N[C@@H](CSc1ccc2ccccc2n1)C(=O)N[C@@H](Cc3ccccc3)[<br/>C@H](O)Cc4ccccc4C(=O)NC(C)(C)C</chem>                                                                 | 14.7  | nM |
| CHEMBL436252  | <chem>CC(C)(C)NC(=O)[C@@H]1C[C@@H]2CCCC[C@@H]2CN1C[C@@<br/>H](O)[C@H](Cc3ccccc3)NC(=O)[C@H]4CCCS(=O)(=O)C4</chem>                                                       | 14.7  | nM |



|              |                                                                                                                                                                                          |       |    |
|--------------|------------------------------------------------------------------------------------------------------------------------------------------------------------------------------------------|-------|----|
| CHEMBL109500 | <chem>CC[C@H](C)[C@H](NC(=O)[C@@H]1CCCN1C[C@H](O)[C@H](Cc2ccccc2)NC(=O)[C@H](CC(=O)N)NC(=O)[C@H](CC(C)C)NC(=O)[C@H](CO)NC(=O)C)C(=O)N[C@@H](C(C)C)C(=O)OC</chem>                         | 14.87 | nM |
| CHEMBL276077 | <chem>C[C@H]1[C@H](CCS1(=O)=O)OC(=O)N[C@@H](Cc2ccccc2)[C@H](O)CN3C[C@H]4CCC[C@H]4C[C@H]3C(=O)NC(C)(C)C</chem>                                                                            | 14.93 | nM |
| CHEMBL34008  | <chem>CC(C)C1(CCc2ccc(O)cc2)CC(=O)C(=C(O)O1)Sc3cc(C)c(NC(=O)c4ccc(cc4)C#N)cc3C(C)C</chem>                                                                                                | 15    | nM |
| CHEMBL105459 | <chem>CNC(=O)[C@@H](NC(=O)[C@H](OCc1ccccc1)[C@H](O)[C@@H](O)[C@@H](OCc2ccccc2)C(=O)N[C@@H](C(C)C)C(=O)NC)C(C)C</chem>                                                                    | 15    | nM |
| CHEMBL116677 | <chem>CC(C)(C)NC(=O)[C@@H]1C[C@@H](CN1C[C@@H](O)C[C@@H](Cc2ccccc2)C(=O)NC3[C@H](O)Cc4ccccc34)Oc5ccc6ccccc6c5</chem>                                                                      | 15    | nM |
| CHEMBL423189 | <chem>COc1ccc(cc1)S(=O)(=O)N(CC(C)C)C[C@@H](O)[C@H](Cc2ccccc2)NC(=O)c3ccc(C)cc3</chem>                                                                                                   | 15    | nM |
| CHEMBL69134  | <chem>CCC(CC)NC(=O)C[C@@H](C(=O)NC[C@@H](O)[C@H](Cc1ccccc1)NC(=O)OCc2ccccc2)C(C)(C)C</chem>                                                                                              | 15    | nM |
| CHEMBL107393 | <chem>CCNC(=O)[C@@H](NC(=O)Cc1cccs1)[C@@H]2N[C@@H](C(=O)NCCNC(=O)[C@@H]3N[C@H](SC3(C)C)[C@H](NC(=O)Cc4cccs4)C(=O)NCC)C(C)(C)S2</chem>                                                    | 15    | nM |
| CHEMBL89038  | <chem>CCCC1(CCc2ccccc2)OC(=C(C(CC)c3ccccc(NS(=O)(=O)c4ccc(cc4)C#N)c3)C(=O)O1)O</chem>                                                                                                    | 15    | nM |
| CHEMBL331458 | <chem>COc1cc(c(SC2=C(O)OC(CCc3ccccc3)(CC2=O)c4ccccc4)cc1C)C(C)(C)C</chem>                                                                                                                | 15    | nM |
| CHEMBL276671 | <chem>CC(C)c1ccccc1SC2=C(O)C=C(OC2=O)c3cc(C)cc(C)c3</chem>                                                                                                                               | 15    | nM |
| CHEMBL21145  | <chem>OCc1ccc(CN2[C@H](Cc3ccccc3)[C@H](O)[C@@H](O)[C@@H](Cc4ccccc4)N(Cc5ccc(CO)cc5)C2=O)cc1</chem>                                                                                       | 15    | nM |
| CHEMBL75833  | <chem>CC(C)[C@@H]1[C@@H](CCS1(=O)=O)OC(=O)N[C@@H](Cc2ccccc2)[C@H](O)CN3CCN(Cc4ccccc4)C[C@H]3C(=O)NC(C)(C)C</chem>                                                                        | 15    | nM |
| CHEMBL151617 | <chem>CC(C)(C)NC(=O)[C@@H]1CN(CCCC(F)(F)F)CCN1C[C@@H](O)C[C@@H](Cc2ccccc2)C(=O)NC3[C@H](O)Cc4ccccc34</chem>                                                                              | 15.3  | nM |
| CHEMBL83768  | <chem>CC(C)(C)NC(=O)[C@@H]1C[C@@H]2CCCC[C@@H]2CN1C[C@@H](O)[C@H](Cc3ccccc3)NC(=O)O[C@@H]4CO[C@@H]5OCC[C@@H]45</chem>                                                                     | 15.41 | nM |
| CHEMBL413390 | <chem>CC(C)[C@H](NC(=O)[C@H](Cc1cccc2ccccc12)CS(=O)(=O)C(C)(C)C)C(=O)N[C@H](Cc3ccccc3)P(=O)(N)[C@@H](Cc4ccccc4)NC(=O)[C@@H](NC(=O)[C@H](Cc5ccccc6ccccc56)CS(=O)(=O)C(C)(C)C)C(C)C</chem> | 15.81 | nM |
| CHEMBL316767 | <chem>CC(C)[C@H](NC(=O)CSc1ncccn1)C(=O)N[C@@H](Cc2ccccc2)[C@@H](O)[C@H](O)[C@H](Cc3ccccc3)NC(=O)[C@@H](NC(=O)CSc4ncccn4)C(C)C</chem>                                                     | 16    | nM |
| CHEMBL20930  | <chem>CC(C)(C)OC(=O)N[C@@H](Cc1ccccc1)[C@@H](O)C[C@@H](Cc2ccccc2)C(=O)NC3CCCc4ccccc34</chem>                                                                                             | 16    | nM |
| CHEMBL324398 | <chem>COC(=O)N[C@@H](C(C)C)C(=O)N[C@@H](Cc1ccccc1)C(O)CN(CCC(C)C)NC(=O)[C@@H](NC(=O)OC)C(C)C</chem>                                                                                      | 16    | nM |
| CHEMBL321165 | <chem>COC(=O)N[C@@H](C(C)C)C(=O)N[C@@H](Cc1ccccc1)C(O)CN(Cc2ccc(OC)cc2)NC(=O)[C@@H](NC(=O)OC)C(C)C</chem>                                                                                | 16    | nM |
| CHEMBL357009 | <chem>CC(C)(CO)OC(=O)N[C@@H](Cc1ccccc1)[C@H](O)CNC[C@@H](O)[C@H](Cc2ccccc2)NC(=O)OC(C)(C)CO</chem>                                                                                       | 16    | nM |
| CHEMBL11287  | <chem>COc1ccc(SC[C@H](NS(=O)(=O)C)C(=O)N[C@@H](Cc2ccccc2)[C@H](O)Cc3ccccc3C(=O)NC(C)(C)C)cc1</chem>                                                                                      | 16    | nM |
| CHEMBL168384 | <chem>Cc1cc(SC2=C(O)OC(C)(CCc3ccc(O)cc3)CC2=O)c(cc1OS(=O)(=O)c4ccc(F)cc4)C(C)(C)C</chem>                                                                                                 | 16.9  | nM |
| CHEMBL326913 | <chem>COC(=O)N[C@@H](C(C)C)C(=O)N[C@@H](Cc1ccccc1)C(O)CN(Cc2cccs2)NC(=O)[C@@H](NC(=O)OC)C(C)C</chem>                                                                                     | 17    | nM |
| CHEMBL263995 | <chem>CC(C)(C)c1ccccc1SC2=C(O)C=C(OC2=O)c3ccccc3</chem>                                                                                                                                  | 17    | nM |
| CHEMBL146875 | <chem>CC(C)(C)OC(=O)N[C@@H](Cc1ccccc1)[C@@H](O)C[C@]2(Cc3ccc(cc3)CCN([C@@H]4CS(=O)(=O)Cc5ccccc45)C2=O</chem>                                                                             | 17    | nM |
| CHEMBL126058 | <chem>CC(C)c1ccc(C)cc1SC2=C(O)C=C(OC2=O)c3ccccc3</chem>                                                                                                                                  | 17    | nM |

|              |                                                                                                                           |       |    |
|--------------|---------------------------------------------------------------------------------------------------------------------------|-------|----|
| CHEMBL125506 | CCC(C)c1ccccc1SC2=C(O)OC(CC2=O)(c3ccccc3)c4ccccc4                                                                         | 17    | nM |
| CHEMBL74275  | CC(C)C1(CCc2cnnc2)CC(=O)C(=C(O)O1)Sc3cc(C)c(CO)cc3C(C)(C)C                                                                | 17    | nM |
| CHEMBL275792 | Cn1nnnc1SC[C@H](NS(=O)(=O)C)C(=O)N[C@@H](Cc2ccccc2)[C@H](O)Cc3ccccc3C(=O)NC(C)(C)C                                        | 17.5  | nM |
| CHEMBL124555 | CC(C)(C)c1ccccc1SC2=C(O)OC(CCc3ccccc3)(CC2=O)c4ccccc4                                                                     | 17.66 | nM |
| CHEMBL93082  | CC(C)(C)NC(=O)[C@@H]1CCCN1C[C@@H](O)[C@H](Cc2ccccc2)NC(=O)[C@H](CC(=O)N)NC(=O)OCc3ccccc3                                  | 18    | nM |
| CHEMBL431976 | CC(C)C1(CCc2csc(NC(=O)C)n2)CC(=O)C(=C(O)O1)Sc3cc(C)c(CO)cc3C(C)(C)C                                                       | 18    | nM |
| CHEMBL324657 | COC(=O)N[C@@H](C(C)C)C(=O)N[C@@H](Cc1ccccc1)C(O)CN(Cc2ccc(O)cc2)NC(=O)[C@@H](NC(=O)OC)C(C)C                               | 18    | nM |
| CHEMBL171873 | CC(C)C1(CCc2ccc(O)cc2)CC(=O)C(=C(O)O1)Sc3cc(C)c(NS(=O)(=O)c4ccc(cc4)C(F)(F)F)cc3C(C)(C)C                                  | 18.3  | nM |
| CHEMBL169247 | CC(C)C1(CCc2ccc(N)cc2)CC(=O)C(=C(O)O1)Sc3cc(C)c(OS(=O)(=O)c4cccs4)cc3C(C)(C)C                                             | 18.5  | nM |
| CHEMBL418511 | Cc1ccc(c(SC2=C(O)OC(CCc3ccccc3)(CC2=O)c4ccccc4)c1)C(C)(C)C                                                                | 18.71 | nM |
| CHEMBL353815 | CC(C)C[C@H]1[C@H](CCS1(=O)=O)OC(=O)N[C@@H](Cc2ccccc2)[C@H](O)CN3C[C@H]4CCCC[C@H]4C[C@H]3C(=O)NC(C)(C)C                    | 18.97 | nM |
| CHEMBL17852  | CC(C)(C)NC(=O)[C@@H]1C[C@@H]2CCCC[C@@H]2CN1C[C@@H](O)[C@H](Cc3ccccc3)NC(=O)C4CO[C@@H]5CCS(=O)(=O)[C@@H]5C4                | 18.97 | nM |
| CHEMBL69651  | CC(C)(C)NC(=O)C[C@@H](C(=O)NC[C@@H](O)[C@H](Cc1ccccc1)NC(=O)OCc2ccccc2)C(C)(C)C                                           | 19    | nM |
| CHEMBL77621  | CC(C)[C@H](NC(=O)[C@@H](NC(=O)[C@@H]1CCCN1C[C@H](Cc2ccccc2)NC(=O)[C@H](C)NC(=O)[C@H](N)C)C(=O)N                           | 19    | nM |
| CHEMBL324377 | COC(=O)N[C@@H](C(C)C)C(=O)N[C@@H](Cc1ccccc1)C(O)CN(Cc2ccc(C)cc2)NC(=O)[C@@H](NC(=O)OC)C(C)C                               | 19    | nM |
| CHEMBL423648 | CC(=O)N[C@@H](CC(=O)N)C(=O)N[C@@H](CSc1ccccc1)[C@H](O)Cc2ccccc2C(=O)NC(C)(C)C                                             | 19    | nM |
| CHEMBL74654  | CC(C)C1(CCc2ncc(C)s2)CC(=O)C(=C(O)O1)Sc3cc(C)c(CO)cc3C(C)(C)C                                                             | 19    | nM |
| CHEMBL432787 | CCNC(=O)[C@@H](NC(=O)Cc1cccn1)[C@@H]2N[C@@H](C(=O)NCCNC(=O)[C@@H]3N[C@H](SC3(C)C)[C@H](NC(=O)Cc4cccn4)C(=O)NCC)C(C)(C)S2  | 19    | nM |
| CHEMBL98302  | CC(C)(C)NC(=O)N(C[C@@H](O)[C@H](Cc1ccccc1)NC(=O)[C@H](CC(=O)N)NC(=O)c2ccc3ccccc3n2)Cc4cncnc4                              | 19    | nM |
| CHEMBL329068 | CC(C)(C)NC(=O)N(C[C@@H](O)[C@H](Cc1ccccc1)NC(=O)[C@H](CC(=O)N)NC(=O)OCc2ccccc2)Cc3ccccc3                                  | 19    | nM |
| CHEMBL71852  | CC(C)NC(=O)C[C@@H](C(=O)NC[C@@H](O)[C@H](Cc1ccccc1)NC(=O)OCc2ccccc2)C(C)(C)C                                              | 19    | nM |
| CHEMBL273424 | CC(C)(C)NC(=O)c1ccccc1C[C@@H](O)[C@H](Cc2ccccc2)NC(=O)[C@H](CS(=O)(=O)Cc3ccccc3)NS(=O)(=O)C                               | 19.4  | nM |
| CHEMBL325107 | CC(C)(C)OC(=O)N[C@@H](Cc1ccccc1)[C@@H](O)C[C@@H](Cc2ccccc2)C(=O)N[C@@H]3CCc4ccccc34                                       | 19.97 | nM |
| CHEMBL333611 | CC(C)[C@@H](NC(=O)OCCN1CCOCC1)C(=O)N[C@@H](Cc2ccccc2)[C@H](O)[C@H](O)[C@H](Cc3ccccc3)NC(=O)[C@@H](NC(=O)OCCN4CCOCC4)C(C)C | 20    | nM |
| CHEMBL71980  | CN(C)S(=O)(=O)Oc1cc(c(SC2=C(O)OC(CCc3ccc(O)cc3)(CC2=O)C4CCCC4)cc1C)C(C)(C)C                                               | 20    | nM |
| CHEMBL445105 | CC(C)(C)OC(=O)N[C@@H](Cc1ccc(OCc2ccccc2)cc1)C(=O)N3CCC(=O)[C@@H]3Sc4ccccc4                                                | 20    | nM |
| CHEMBL275960 | CC(=O)N[C@@H](CS(=O)(=O)c1ccccc1)C(=O)N[C@@H](Cc2ccccc2)[C@H](O)Cc3ccccc3C(=O)NC(C)(C)C                                   | 20    | nM |
| CHEMBL274128 | CC(Oc1c(C)cccc1C)C(=O)N[C@@H](Cc2ccccc2)[C@H](O)CN3CC[C@H](C[C@H]3C(=O)NC(C)(C)C)OCc4cncnc4                               | 20    | nM |

|              |                                                                                                                                                               |       |    |
|--------------|---------------------------------------------------------------------------------------------------------------------------------------------------------------|-------|----|
| CHEMBL201918 | CC(C)(C)OC(=O)N[C@@H](Cc1ccccc1)[C@@H](O)C[C@]2(Cc3ccc<br>cc3)N=CC(=C2O)C4C[C@H](CC(=O)N)c5ccccc45                                                            | 20.5  | nM |
| CHEMBL125719 | Cc1ccc(c(SC2=C(O)OC(Cc3ccccc3)(CC2=O)c4ccc(O)cc4)c1)C(C)(C)<br>C                                                                                              | 20.98 | nM |
| CHEMBL106991 | CC(C)(C)OC(=O)CNC(=O)[C@@H](NC(=O)Cc1ccccc1)[C@@H]2N[<br>C@@H](C(=O)NCCNC(=O)[C@@H]3N[C@H](SC3(C)C)[C@H](NC<br>(=O)Cc4ccccc4)C(=O)NCC(=O)OC(C)(C)C(C)(C)S2    | 21    | nM |
| CHEMBL122402 | CC(C)(C)NC(=O)[C@H]1N(CC(O)CNC(=O)[C@@H]2N[C@H](SC2(<br>C)C)[C@H](NC(=O)Cc3ccccc3)C(=O)NCc4ccccc4)CSC1(C)C                                                    | 21    | nM |
| CHEMBL171404 | Cc1cc(SC2=C(O)OC(Cc3ccc(O)cc3)(CC2=O)C4CCCCC4)c(cc1O)S(=<br>O)(=O)c5ccc(cc5)C#N)C(C)(C)C                                                                      | 21    | nM |
| CHEMBL282787 | CC(C)(C)NC(=O)c1ccccc1C[C@@H](O)[C@H](Cc2ccccc2)NC(=O)[C<br>@H](CC(=O)N)NC(=O)c3ccc4ccccc4n3                                                                  | 21.17 | nM |
| CHEMBL169142 | CC(C)C1(CCc2ccc(O)cc2)CC(=O)C(=C(O)O1)Sc3cc(C)c(OS(=O)(=O)<br>c4cccs4)cc3C(C)(C)C                                                                             | 21.8  | nM |
| CHEMBL279279 | CC(C)(C)OC(=O)N[C@@H](Cc1ccccc1)[C@@H](O)C[C@@H](Cc2c<br>cccc2)C(=O)NC3Cc4ccccc34                                                                             | 22    | nM |
| CHEMBL13136  | CC(C)c1ccccc1SC2=C(O)C=C(OC2=O)c3ccc(Cl)c(Cl)c3                                                                                                               | 22    | nM |
| CHEMBL109220 | CC(C)[C@@H](NC(=O)CCc1ccccc1)C(=O)N[C@@H](Cc2ccccc2)C(<br>O)[C@H](Cc3ccccc3)NC(=O)[C@@H](NC(=O)CCc4ccccc4)C(C)C                                               | 22    | nM |
| CHEMBL273437 | CC(C)(C)NC(=O)c1ccccc1C[C@@H](O)[C@H](Cc2ccccc2)NC(=O)[C<br>@H](CS(=O)(=O)c3ccccc3)NS(=O)(=O)C                                                                | 22    | nM |
| CHEMBL90510  | Nc1ccc(cc1O)C(=O)N[C@H](C[C@H](O)[C@H](Cc2ccccc2)NC(=O)<br>OCc3ccccc3)Cc4ccccc4                                                                               | 22    | nM |
| CHEMBL97512  | CC(C)[C@H](NC(=O)OCc1ccccc1)C(=O)N[C@@H](Cc2ccccc2)[C@<br>@H](O)CN(Cc3ccc(F)cc3)NC(=O)[C@@H](NC(=O)OCc4ccccc4)C(C)<br>C                                       | 22    | nM |
| CHEMBL88964  | CCCC1(CCc2ccccc2)OC(=C(C(CC)c3ccccc3)NS(=O)(=O)c4ccc(cc4)C(F)<br>(F)F)c3)C(=O)O1)O                                                                            | 22.36 | nM |
| CHEMBL427631 | CC1(C)S[C@@H](N[C@H]1C(=O)NC[C@@H](O)[C@H](O)CNC(=<br>O)[C@@H]2N[C@H](SC2(C)C)[C@H](NC(=O)Cc3ccccc3)C(=O)NC<br>c4ccccc4)[C@H](NC(=O)Cc5ccccc5)C(=O)NCc6ccccc6 | 22.45 | nM |
| CHEMBL139237 | CC(C)(C)OC(=O)[C@@H]1CCCN1C[C@@H](O)[C@H](Cc2ccccc2)<br>NC(=O)[C@H](CC(=O)N)NC(=O)c3ccc4ccccc4n3                                                              | 23    | nM |
| CHEMBL263236 | CC(C)C[C@H](NC(=O)[C@@H](C[C@H](O)[C@H](Cc1ccccc1)NC(<br>=O)OC(C)(C)C)Cc2ccccc2)C(=O)NCCCN(C)C                                                                | 23    | nM |
| CHEMBL109699 | CC(C)[C@@H](NC(=O)CCN1CCOCC1)C(=O)N[C@@H](Cc2ccccc2)<br>[C@H](O)[C@H](O)[C@H](Cc3ccccc3)NC(=O)[C@@H](NC(=O)CC<br>N4CCOCC4)C(C)C                               | 23    | nM |
| CHEMBL541982 | COc1ccc(c1)C(=O)N[C@@H](Cc2ccccc2)[C@@H](O)C[C@H](Cc3c<br>cccc3)NC(=O)OC(C)(C)C                                                                               | 23    | nM |
| CHEMBL121920 | CC(C)(C)NC(=O)[C@@H]1C[C@@H]2CCCC[C@@H]2CN1C[C@@<br>H](O)CNC(=O)[C@@H]3N[C@H](SC3(C)C)C(NC(=O)Cc4ccccc4)C(<br>=O)N                                            | 23    | nM |
| CHEMBL324630 | COC(=O)NC(C(C)C)C(=O)NN(CC(C)C)C[C@H](O)[C@H](Cc1ccccc<br>1)NC(=O)[C@H](CC(=O)N)NC(=O)c2ccc3ccccc3n2                                                          | 23    | nM |
| CHEMBL12714  | CC(C)c1ccccc1SC2=C(O)C=C(OC2=O)c3ccccc(Cl)c3                                                                                                                  | 23    | nM |
| CHEMBL124892 | CC(C)c1ccccc1SC2=C(O)OC(CC2=O)(c3ccccc3)c4ccccc4                                                                                                              | 23    | nM |
| CHEMBL95462  | CC(C)[C@H](NC(=O)OCc1ccccc1)C(=O)N[C@@H](Cc2ccccc2)[C@<br>@H](O)CN(Cc3ccc(cc3)C#N)NC(=O)[C@@H](NC(=O)OCc4ccccc4)C<br>(C)C                                     | 24    | nM |
| CHEMBL99774  | CC(C)(C)NC(=O)[C@@H]1C[C@@H]2CCCC[C@@H]2CN1C[C@@<br>H](O)[C@H](Cc3ccccc3)NC(=O)[C@@H](CSc4ccc(F)cc4)NS(=O)(=O)<br>)C                                          | 24    | nM |
| CHEMBL356947 | CCCNC(=O)[C@@H](NC(=O)Cc1ccccc1)[C@@H]2N[C@@H](C(=O)<br>)NCC(CO)NC(=O)[C@@H]3N[C@H](SC3(C)C)[C@H](NC(=O)Cc4c<br>cccc4)C(=O)NCC)C(C)(C)S2                      | 25    | nM |

|               |                                                                                                                                                         |       |    |
|---------------|---------------------------------------------------------------------------------------------------------------------------------------------------------|-------|----|
| CHEMBL302902  | <chem>CC(C)(C)OC(=O)N[C@@H](Cc1ccc(O)cc1)C(=O)N2CCC(=O)[C@@H]2Sc3ccccc3</chem>                                                                          | 25.5  | nM |
| CHEMBL12224   | <chem>CC(C)c1ccccc1SC2=C(O)C=C(OC2=O)c3cc(Cl)cc(Cl)c3</chem>                                                                                            | 26    | nM |
| CHEMBL333982  | <chem>CN(C)c1ccc(CNC(=O)C(NC(=O)Cc2ccccc2)[C@@H]3N[C@@H](C(=O)NC[C@H](O)CN4C[C@H]5CCCC[C@H]5C[C@H]4C(=O)NC(C)(C)C)C(C)S3)cc1</chem>                     | 26    | nM |
| CHEMBL329974  | <chem>CN(C)CCCNC(=O)[C@@H](NC(=O)[C@@H](C[C@H](O)[C@H](Cc1ccccc1)NC(=O)OC(C)(C)Cc2ccccc2)c3ccccc3</chem>                                                | 26    | nM |
| CHEMBL164570  | <chem>CC(C)c1ccccc1SC2=C(O)OC(CCCCC(=O)NCc3ccccc3)(CC2=O)c4cccc4</chem>                                                                                 | 26    | nM |
| CHEMBL324989  | <chem>CCC(C)[C@H](NC(=O)C[C@H](O)[C@H](CC1CCCC1)NC(=O)CC2CCCN3N2C(=O)C(CN)CCC3=O)C(=O)N[C@@H](Cc4ccccc4)C(=O)N</chem>                                   | 26    | nM |
| CHEMBL71218   | <chem>CCNS(=O)(=O)Oc1cc(c(SC2=C(O)OC(CCc3ccc(O)cc3)(CC2=O)c4cccc4)cc1C)C(C)C</chem>                                                                     | 26    | nM |
| CHEMBL279372  | <chem>CCCC[C@@H]1[C@@H](CCS1(=O)=O)OC(=O)N[C@@H](Cc2ccccc2)[C@H](O)CN3C[C@H]4CCCC[C@H]4C[C@H]3C(=O)NC(C)(C)C</chem>                                     | 26.12 | nM |
| CHEMBL322119  | <chem>COC(=O)NC(C(C)C)C(=O)NN(C[C@H](O)[C@H](Cc1ccccc1)NC(=O)[C@H](CC(=O)N)NC(=O)c2ccc3ccccc3n2)CC4CCCC4</chem>                                         | 27    | nM |
| CHEMBL224483  | <chem>CC(C)(C)[C@H](NC(=O)OCc1ccccc1)C(=O)NC(Cc2ccccc2)C(=O)C(F)(F)C(=O)NCc3ccccc3</chem>                                                               | 27    | nM |
| CHEMBL154952  | <chem>CC(C)CCN(C[C@@H](O)[C@H](Cc1ccccc1)NC(=O)[C@H](CC(=O)N)NC(=O)c2ccc3ccccc3n2)S(=O)(=O)C</chem>                                                     | 27    | nM |
| CHEMBL341697  | <chem>COc1ccc(cc1)S(=O)(=O)N(CC(C)C)C[C@@H](O)[C@H](Cc2ccccc2)NC(=O)c3ccccc3</chem>                                                                     | 27    | nM |
| CHEMBL91995   | <chem>CC(C)CN1CCN(C[C@@H](O)[C@H](Cc2ccccc2)NC(=O)O[C@@H]3CCS(=O)(=O)[C@@H]3C(C)C)[C@@H](C1)C(=O)NC(C)(C)C</chem>                                       | 27.1  | nM |
| CHEMBL331846  | <chem>Cc1ccc(c(SC2=C(O)OC(CCc3ccccc3)(CC2=O)c4cccc(N)cc4)c1)C(C)(C)C</chem>                                                                             | 27.71 | nM |
| CHEMBL122426  | <chem>CC(C)c1ccc(C)cc1SC2=C(O)OC(CCc3ccccc3)(CC2=O)c4cccc4</chem>                                                                                       | 27.93 | nM |
| CHEMBL61755   | <chem>CCc1c(SC2=C(O)OC(CCc3ccccc3)(CC2=O)c4cccc4)sc5ccccc15</chem>                                                                                      | 28    | nM |
| CHEMBL405134  | <chem>CC(C)(C)NC(=O)[C@@H]1CN(Cc2cccc(c2)C(C)(C)NC(=O)OC(C)(C)C)CCN1C[C@@H](O)C[C@@H](Cc3ccccc3)C(=O)NC4[C@H](O)Cc5ccccc45</chem>                       | 28    | nM |
| CHEMBL411507  | <chem>CC(C)[C@@H](NC(=O)OCc1ccccc1)C(=O)N[C@@H](Cc2ccccc2)[C@H](O)[C@H](Cc3ccccc3)NC(=O)[C@@H](NC(=O)N4CCN(C)CC4)C(C)C</chem>                           | 28    | nM |
| CHEMBL29010   | <chem>Cc1ccccc1[C@@H](O)[C@H](Cc2ccccc2)NC(=O)[C@H](CC(=O)N)NC(=O)c3ccc4ccccc4n3)c1C(=O)NC(C)(C)C</chem>                                                | 28    | nM |
| CHEMBL320671  | <chem>CC(C)[C@H](NC(=O)C)C(=O)N[C@@H](Cc1ccccc1)[C@@H](O)CN(Cc2ccc(F)cc2)NC(=O)[C@@H](NC(=O)C)C(C)C</chem>                                              | 28    | nM |
| CHEMBL98150   | <chem>CC(C)(C)NC(=O)N(C[C@@H](O)[C@H](Cc1ccccc1)NC(=O)[C@H](CC(=O)N)NC(=O)OCc2ccccc2)CC3CCCC3</chem>                                                    | 29    | nM |
| CHEMBL355735  | <chem>Cc1cc(SC2=C(O)OC(CCc3ccc(O)cc3)(CC2=O)C4CCCC4)c(cc1OS(=O)(=O)c5ccc(F)cc5)C(C)(C)C</chem>                                                          | 29    | nM |
| CHEMBL97423   | <chem>CC(C)(C)OC(=O)N[C@@H](Cc1ccccc1)[C@@H](O)C[C@@H](Cc2ccccc2)C(=O)N[C@@H](Cc3ccccc3)C(=O)N</chem>                                                   | 29    | nM |
| CHEMBL291773  | <chem>CC(C)(C)OC(=O)N[C@@H](Cc1ccccc1)[C@H](O)CNC[C@@H](O)[C@H](Cc2ccc(COC(=O)N3CCOCC3)cc2)NC(=O)OC(C)(C)C</chem>                                       | 30    | nM |
| CHEMBL2114445 | <chem>CC[C@H](C)[C@H](NC(=O)[C@@H](C[C@@H](O)CN1C[C@H]2CCC[C@H]2C[C@H]1C(=O)NC(C)(C)Cc3ccccc3)C(=O)NCc4nc5ccccc5[nH]4</chem>                            | 30    | nM |
| CHEMBL290163  | <chem>COC(=O)[C@H](Cc1ccccc1)NC(=O)[C@H](CC(C)C)NC(=O)[C@@H](CC(O)C[C@@H](Cc2ccccc2)C(=O)N[C@@H](CC(C)C)C(=O)N[C@@H](Cc3ccccc3)C(=O)OC)Cc4ccccc4</chem> | 30    | nM |
| CHEMBL94497   | <chem>CC(C)[C@@H](NC(=O)C)C(=O)NN(C[C@H](O)[C@H](Cc1ccccc1)NC(=O)[C@@H](NC(=O)C)C(C)C)Cc2ccccc2</chem>                                                  | 30    | nM |

|              |                                                                                                                                                    |       |    |
|--------------|----------------------------------------------------------------------------------------------------------------------------------------------------|-------|----|
| CHEMBL415896 | CC[C@H](C)[C@H](NC(=O)[C@H](CC(C)C)CC(O)CN1C[C@H]2C<br>CCC[C@H]2C[C@H]1C(=O)NC(C)(C)C(=O)NCc3nc4cccc4[nH]3                                         | 30    | nM |
| CHEMBL40829  | CC[C@H](C)[C@H](NC(=O)[C@H](CC(O)CN1CCCC1C(=O)NC<br>(C)(C)C)Cc2cccc2)C(=O)NCc3nc4cccc4[nH]3                                                        | 30    | nM |
| CHEMBL91102  | O[C@@H](C[C@H](Cc1cccc1)NC(=O)c2cccc2)[C@H](Cc3cccc3)<br>NC(=O)OCc4cccc4                                                                           | 31    | nM |
| CHEMBL93120  | CC(C)(C)OC(=O)N[C@H](C[C@H](O)[C@H](Cc1cccc1)NC(=O)c2c<br>(Cl)ccc(N)c2Cl)Cc3cccc3                                                                  | 31    | nM |
| CHEMBL320783 | COC(=O)NC(C(C)C)C(=O)NN(C[C@H](O)[C@H](Cc1cccc1)NC(=O)<br>)C[C@H](CC(=O)N)NC(=O)c2ccc3cccc3n2)Cc4ccc(OC)cc4                                        | 31    | nM |
| CHEMBL330980 | CCNC(=O)C(NC(=O)Cc1cccc1)[C@@H]2N[C@@H](C(=O)NCC(O)<br>CN3C[C@H]4CCCC[C@H]4C[C@H]3C(=O)NC(C)(C)C(C)(C)S2                                           | 31    | nM |
| CHEMBL158358 | CC(C)c1nc(CN(C2CC2)C(=O)NCCC(=O)N[C@@H](Cc3cccc3)[C@<br>@H](O)C[C@H](Cc4cccc4)NC(=O)OCc5cnc5)cs1                                                   | 31.97 | nM |
| CHEMBL122320 | OC1=C(Sc2cccc2C3CCCC3)C(=O)CC(CCc4cccc4)(O1)c5cccc5                                                                                                | 32    | nM |
| CHEMBL339407 | Cc1cc(SC2=C(O)OC(CCc3cccc3)(CC2=O)c4cccc4)c(cc1O)C(C)(C)C<br>COC(=O)N[C@@H](C(C)C)C(=O)N[C@@H](Cc1cccc1)C(O)CN(Cc                                  | 33    | nM |
| CHEMBL280464 | 2ccc(cc2)C(F)(F)F)NC(=O)[C@@H](NC(=O)OC)C(C)C                                                                                                      | 33    | nM |
| CHEMBL97547  | CC(C)[C@@H](NC(=O)OCc1cccc1)C(=O)NN(C[C@H](O)[C@H](C<br>c2cccc2)NC(=O)[C@@H](NC(=O)OCc3cccc3)C(C)C)Cc4cccc4                                        | 33    | nM |
| CHEMBL325561 | COC(=O)N[C@@H](C(C)C)C(=O)N[C@@H](Cc1cccc1)C(O)CN(Cc<br>2ccc(OC)c(OC)c2OC)NC(=O)[C@@H](NC(=O)OC)C(C)C                                              | 34    | nM |
| CHEMBL276097 | CC(C)OC(=O)c1cccc1CSC2=C(O)C=C(OC2=O)c3cccc3                                                                                                       | 34    | nM |
| CHEMBL292264 | CC(C)(C)c1cc2CCCc2cc1SC3=C(O)OC(CCc4cccc4)(CC3=O)c5cccc<br>5                                                                                       | 34.21 | nM |
| CHEMBL88757  | CC(C)[C@@H]1[C@@H](CCS1(=O)=O)OC(=O)N[C@@H](Cc2cccc<br>c2)[C@H](O)CN3CCN(C[C@H]3C(=O)NC(C)(C)C)C4CCOCC4                                            | 34.6  | nM |
| CHEMBL297633 | CC[C@H](C[C@H](O)[C@H](Cc1cccc1)NC(=O)OC(C)(C)C(=O)<br>N[C@@H]2[C@H](O)Cc3cccc23                                                                   | 34.7  | nM |
| CHEMBL90768  | CC(C)[C@@H]1[C@@H](CCS1(=O)=O)OC(=O)N[C@@H](Cc2cccc<br>c2)[C@H](O)CN3CCN(C[C@H]3C(=O)NC(C)(C)C)C4CCCC4                                             | 35    | nM |
| CHEMBL148090 | CC(C)[C@@H](CO)N1CC[C@](C[C@H](O)[C@H](Cc2cccc2)NC(=<br>O)OC(C)(C)C)(Cc3cccc3)C1=O                                                                 | 35    | nM |
| CHEMBL12768  | CCOC(=O)c1ccc(cc1)C2=CC(=C(Sc3cccc3C(C)C)C(=O)O2)O                                                                                                 | 35    | nM |
| CHEMBL325800 | CCNC(=O)[C@@H](NC(=O)Cc1cccc1)[C@@H]2N[C@@H](C(=O)<br>NCCNC(=O)[C@@H]3N[C@@H](CNC(=O)Cc4cccc4)SC3(C)C)C(C<br>)C)S2                                 | 35    | nM |
| CHEMBL143470 | CC(C)(C)OC(=O)N[C@@H](Cc1cccc1)[C@H](O)CNC[C@@H](O)[<br>C@H](Cc2cccc2)NC(=O)OC(C)(C)CO                                                             | 35    | nM |
| CHEMBL124789 | CC(C)c1cccc1SC2=C(O)OC(CCc3cccc3)(CC2=O)c4cccc4                                                                                                    | 36.85 | nM |
| CHEMBL140653 | COc1ccc(cc1)S(=O)(=O)N(CC(C)C)C[C@@H](O)[C@H](Cc2cccc2)<br>NC(=O)c3cccc3C(F)(F)F                                                                   | 37    | nM |
| CHEMBL325778 | CC(C)CN(C[C@H](O)[C@H](Cc1cccc1)NC(=O)[C@H](CC(=O)N)N<br>C(=O)c2ccc3cccc3n2)NC(=O)C(NC(=O)OCc4cccc4)C(C)C                                          | 37    | nM |
| CHEMBL430701 | CC(C)(C)NC(=O)[C@@H]1CNCCN1C[C@@H](O)C[C@@H](Cc2cc<br>ccc2)C(=O)NC3[C@H](O)Cc4cccc34                                                               | 38    | nM |
| CHEMBL12421  | CC(C)c1cccc1SC2=C(O)C=C(OC2=O)c3cccc(c3)c4cccc4                                                                                                    | 38    | nM |
| CHEMBL122480 | CC(C)c1ccc(C)cc1SC2=C(O)OC(CC2=O)(c3cccc3)c4cccc4                                                                                                  | 38    | nM |
| CHEMBL386631 | CC1(C)S[C@@H](N[C@H]1C(=O)NCCNC(=O)[C@@H]2N[C@H](S<br>C2(C)C)[C@H](NC(=O)c3cccc3c4cccc4)C(=O)NCC(=O)O)[C@H](<br>NC(=O)c5cccc5c6cccc6)C(=O)NCC(=O)O | 39    | nM |
| CHEMBL107310 | CC1(C)S[C@@H](N[C@H]1C(=O)NCCNC(=O)[C@@H]2N[C@H](S<br>C2(C)C)[C@H](NC(=O)Cc3cccc3)C(=O)NCC(=O)O)[C@H](NC(=O)<br>Cc4cccc4)C(=O)NCC(=O)O             | 39    | nM |
| CHEMBL68267  | CCCC(CCC)NC(=O)C[C@@H](C(=O)NC[C@@H](O)[C@H](Cc1ccc<br>cc1)NC(=O)OCc2cccc2)C(C)(C)C                                                                | 39    | nM |

|               |                                                                                                                                                                     |       |    |
|---------------|---------------------------------------------------------------------------------------------------------------------------------------------------------------------|-------|----|
| CHEMBL273317  | <chem>CC(C)(C)NC(=O)[C@@H]1C[C@@H]2CCCC[C@@H]2CN1C[C@@H](O)[C@H](Cc3ccccc3)NC(=O)O[C@H]4CCS(=O)(=O)C4</chem>                                                        | 39.77 | nM |
| CHEMBL345868  | <chem>OC(C[C@@H](Cc1ccccc1)C(=O)N[C@H]2CCCC[C@@H]2NC(=O)c3ccc4ccccc4n3)C[C@@H](Cc5ccccc5)C(=O)N[C@H]6CCCC[C@@H]6NC(=O)c7ccc8ccccc8n7</chem>                         | 40    | nM |
| CHEMBL60782   | <chem>CC(C)(C)OC(=O)N[C@@H](Cc1ccccc1)[C@H](O)CNC[C@@H](O)[C@H](Cc2ccc(OCCN3CCOC3=O)cc2)NC(=O)OC(C)(C)C</chem>                                                      | 40    | nM |
| CHEMBL2374443 | <chem>COC(=O)N[C@H](CCc1ccccc1)C(=O)NCCCC[C@@H](CO)N(CC(C)C)S(=O)(=O)c2ccc(N)cc2</chem>                                                                             | 40    | nM |
| CHEMBL301046  | <chem>CN(C)C(=O)OCCOc1ccc(C[C@H](NC(=O)OC(C)(C)C)[C@H](O)CN[C@@H](O)[C@H](Cc2ccccc2)NC(=O)OC(C)(C)C)cc1</chem>                                                      | 40    | nM |
| CHEMBL326679  | <chem>CC1(C)S[C@@H](N[C@H]1C(=O)NCCNC(=O)[C@@H]2N[C@H](S2(C)C)[C@H](NC(=O)Cc3ccccc3)C(=O)NCCO)[C@H](NC(=O)Cc4ccccc4)C(=O)NCCO</chem>                                | 40    | nM |
| CHEMBL320050  | <chem>CC1(C)S[C@@H](N[C@H]1C(=O)NCCNC(=O)[C@@H]2N[C@H](S2(C)C)[C@H](NC(=O)Cc3ccccc3)C(=O)NCC4CCCC4)[C@H](NC(=O)Cc5ccccc5)C(=O)NCC6CCCC6</chem>                      | 40    | nM |
| CHEMBL108807  | <chem>COC(=O)N[C@@H](C(C)C)C(=O)N[C@@H](Cc1ccccc1)C(O)CN(C(C)C)NC(=O)[C@@H](NC(=O)OC)C(C)C</chem>                                                                   | 41    | nM |
| CHEMBL111259  | <chem>CC(C)C(NC(=O)OCc1ccccc1)C(=O)NN(C[C@H](O)[C@H](Cc2ccccc2)NC(=O)[C@H](CC(=O)N)NC(=O)c3ccc4ccccc4n3)CC5CCCC5</chem>                                             | 41    | nM |
| CHEMBL418527  | <chem>CC(=O)N[C@@H](CSc1ccc2ccccc2c1)C(=O)N[C@@H](Cc3ccccc3)[C@H](O)Cc4ccccc4C(=O)NC(C)(C)C</chem>                                                                  | 42    | nM |
| CHEMBL108102  | <chem>COC(=O)N[C@@H](C(C)C)C(=O)N[C@@H](Cc1ccccc1)C(O)CN(Cc2ccc(F)cc2)NC(=O)[C@@H](NC(=O)OC)C(C)C</chem>                                                            | 42    | nM |
| CHEMBL341237  | <chem>OC1=C(Sc2ccccc2C3CCCC3)C(=O)CC(O1)(c4ccccc4)c5ccccc5</chem>                                                                                                   | 42.17 | nM |
| CHEMBL113554  | <chem>CC(C)[C@@H](NC(=O)N(C)Cc1ccccc1)C(=O)N[C@@H](Cc2ccccc2)C(O)[C@H](Cc3ccccc3)NC(=O)[C@@H](NC(=O)N(C)Cc4ccccc4)C(C)C</chem>                                      | 43    | nM |
| CHEMBL322964  | <chem>CC(C)[C@@H](NC(=O)N1CCOCC1)C(=O)N[C@@H](Cc2ccccc2)[C@@H](O)[C@H](O)[C@H](Cc3ccccc3)NC(=O)[C@@H](NC(=O)N4CCOCC4)C(C)C</chem>                                   | 43    | nM |
| CHEMBL355811  | <chem>CC(C)(C)NC(=O)c1ccccc1OC[C@@H](O)[C@H](Cc2ccccc2)NC(=O)[C@H](CC(=O)N)NC(=O)c3ccc4C(=O)c5ccccc5S(=O)(=O)c4c3</chem>                                            | 44    | nM |
| CHEMBL10777   | <chem>CC(C)(C)NC(=O)c1ccccc1C[C@@H](O)[C@H](Cc2ccccc2)NC(=O)[C@H](CSc3ccccc3)NS(=O)(=O)C</chem>                                                                     | 44    | nM |
| CHEMBL368352  | <chem>CC(C)(C)NC(=O)c1ccccc1OC[C@@H](O)[C@H](Cc2ccccc2)NC(=O)[C@H](CC(=O)N)NC(=O)c3ccc4ccccc4n3</chem>                                                              | 45    | nM |
| CHEMBL292161  | <chem>COc1cc(Oc2ccccc2)ccc1C[C@@H](O)C[C@@H](Cc3ccccc3)C(=O)N[C@@H]4[C@H](O)Cc5ccccc5</chem>                                                                        | 45    | nM |
| CHEMBL97189   | <chem>CC(C)CN(C[C@H](O)[C@H](Cc1ccccc1)NC(=O)[C@@H](NC(=O)C)C(C)C)NC(=O)[C@@H](NC(=O)C)C(C)C</chem>                                                                 | 45    | nM |
| CHEMBL276704  | <chem>CC(=O)N[C@@H](CSCc1ccccc1)C(=O)N[C@@H](Cc2ccccc2)[C@H](O)Cc3ccccc3C(=O)NC(C)(C)C</chem>                                                                       | 45    | nM |
| CHEMBL348047  | <chem>OC(C[C@@H](Cc1ccccc1)C(=O)N[C@H]2CCCC[C@@H]2NC(=O)c3cc4ccccc4n3)C[C@@H](Cc5ccccc5)C(=O)N[C@H]6CCCC[C@@H]6NC(=O)c7cc8ccccc8n7</chem>                           | 45    | nM |
| CHEMBL285836  | <chem>CC(C)CN1CC(O)(CNC(=O)[C@H]2N[C@H](SC2(C)C)[C@H](NC(=O)Cc3ccccc3)C(=O)NCc4ccccc4)[C@H]1C(=O)NC(C)(C)C</chem>                                                   | 45.83 | nM |
| CHEMBL122547  | <chem>CC(C)c1ccc(c(SC2=C(O)OC(CCc3ccccc3))(CC2=O)c4ccccc4)c1)C(C)(C)C</chem>                                                                                        | 47    | nM |
| CHEMBL217396  | <chem>CN(C)c1ccc(CNC(=O)[C@@H](NC(=O)Cc2ccccc2)[C@@H]3N[C@@H](C(=O)NCCNC(=O)[C@@H]4N[C@H](SC4(C)C)[C@H](NC(=O)Cc5ccccc5)C(=O)NCc6ccc(cc6)N(C)C)C(C)(C)S3)cc1</chem> | 47    | nM |
| CHEMBL330739  | <chem>CC(C)[C@@H]1[C@@H](CCS1(=O)=O)OC(=O)N[C@@H](Cc2ccccc2)[C@H](O)CN3CCN(CC(C)(C)C)C[C@H]3C(=O)NC(C)(C)C</chem>                                                   | 48    | nM |
| CHEMBL293860  | <chem>CC(C)(C)c1c(oc2ccccc12)SC3=C(O)OC(CCc4ccccc4)(CC3=O)c5ccccc</chem>                                                                                            | 48.06 | nM |

|               |                                                                                                                                                 |       |    |
|---------------|-------------------------------------------------------------------------------------------------------------------------------------------------|-------|----|
| CHEMBL53979   | <chem>CC(O)COc1ccc(C[C@H](NC(=O)OC(C)(C)C)[C@H](O)CNC[C@@H](O)[C@H](Cc2ccccc2)NC(=O)OC(C)(C)C)cc1</chem>                                        | 49    | nM |
| CHEMBL139309  | <chem>COc1ccc(cc1)S(=O)(=O)N(CC(C)C)C[C@@H](O)[C@H](Cc2ccccc2)NC(=O)c3ccccc3C(C)C</chem>                                                        | 49    | nM |
| CHEMBL325815  | <chem>COc1ccc(CN(C[C@H](O)[C@H](Cc2ccccc2)NC(=O)[C@H](CC(=O)N)NC(=O)c3ccc4ccccc4n3)NC(=O)C(NC(=O)OCc5ccccc5)C(C)C)cc1</chem>                    | 49    | nM |
| CHEMBL341294  | <chem>CC(C)(C)c1ccccc1SC2=C(O)OC(CC2=O)(c3ccccc3)c4ccccc4</chem>                                                                                | 49    | nM |
| CHEMBL59706   | <chem>CC(C)(C)OC(=O)N[C@@H](Cc1ccccc1)[C@H](O)CNC[C@@H](O)[C@H](Cc2ccc(OCCc3ccccc3)cc2)NC(=O)OC(C)(C)C</chem>                                   | 50    | nM |
| CHEMBL59667   | <chem>COC(C)COc1ccc(C[C@H](NC(=O)OC(C)(C)C)[C@H](O)CNC[C@@H](O)[C@H](Cc2ccccc2)NC(=O)OC(C)(C)C)cc1</chem>                                       | 50    | nM |
| CHEMBL120090  | <chem>CC(C)(C)NC(=O)c1ccccc1C[C@@H](O)[C@H](Cc2ccccc2)NC(=O)c3ccccc3C(=O)N4CCc5ccccc5C4</chem>                                                  | 50    | nM |
| CHEMBL327752  | <chem>CC(C)[C@H](NC(=O)C)C(=O)N[C@@H](Cc1ccccc1)[C@@H](O)CN(Cc2ccc(cc2)C#N)NC(=O)[C@@H](NC(=O)C)C(C)C</chem>                                    | 50    | nM |
| CHEMBL98709   | <chem>CC(C)CN(C[C@@H](O)[C@H](Cc1ccccc1)NC(=O)[C@@H](CSc2ccc3ccccc3c2)NS(=O)(=O)C)C(=O)NC(C)(C)C</chem>                                         | 50    | nM |
| CHEMBL323425  | <chem>CC(C)C(NC(=O)OCC=C)C(=O)N[C@@H](Cc1ccccc1)[C@H](O)CN(CC2CCCC2)NC(=O)C(NC(=O)OCC=C)C(C)C</chem>                                            | 51    | nM |
| CHEMBL91062   | <chem>CC(C)(C)OC(=O)N[C@H](C[C@H](O)[C@H](Cc1ccccc1)NC(=O)c2cc(O)cc(O)c2)Cc3ccccc3</chem>                                                       | 51    | nM |
| CHEMBL268605  | <chem>CC(C)(C)NC(=O)c1ccccc1C[C@@H](O)[C@H](Cc2ccccc2)NC(=O)[C@H](CC(=O)OCc3ccccc3)NC(=O)N</chem>                                               | 51    | nM |
| CHEMBL340811  | <chem>OC1=C(SCCc2ccccc2)C(=O)CC(Cc3ccccc3)(O1)c4ccccc4</chem>                                                                                   | 51    | nM |
| CHEMBL316975  | <chem>CC1(C)S[C@@H](N[C@H]1C(=O)N[C@H](Cc2ccccc2)C(O)CNC(=O)Cc3ccccc3)[C@H](NC(=O)Cc4ccccc4)C(=O)NCc5ccccc5</chem>                              | 53    | nM |
| CHEMBL310485  | <chem>CC(C)[C@@H]1[C@@H](CCS1(=O)=O)OC(=O)N[C@@H](Cc2ccccc2)[C@H](O)CN3CCN(Cc4ccc5ccccc5c4)C[C@H]3C(=O)NC(C)(C)C</chem>                         | 54    | nM |
| CHEMBL122641  | <chem>COC(=O)C(NC(=O)Cc1ccccc1)[C@@H]2N[C@@H](C(=O)NC[C@H](O)CN3C[C@H]4CCCC[C@H]4C[C@H]3C(=O)NC(C)(C)C)C(C)C)S2</chem>                          | 54    | nM |
| CHEMBL12950   | <chem>CC(C)c1ccccc1SC2=C(O)C=C(OC2=O)c3ccc(O)cc3</chem>                                                                                         | 54    | nM |
| CHEMBL320637  | <chem>CC1(C)S[C@@H](N[C@H]1C(=O)N[C@H](Cc2ccccc2)[C@H](O)CC(=O)NCCCO)[C@H](NC(=O)Cc3ccccc3)C(=O)NCc4ccccc4</chem>                               | 54    | nM |
| CHEMBL354884  | <chem>CC(C)(C)NC(=O)[C@@H]1C[C@@H]2CCCC[C@@H]2CN1C[C@@H](O)[C@H](Cc3ccccc3)NC(=O)C4=CCCS(=O)(=O)C4</chem>                                       | 54.7  | nM |
| CHEMBL2062145 | <chem>CC(C)(C)OC(=O)N[C@@H](Cc1ccccc1)[C@@H](O)C[C@@]2(Cc3ccccc3)CCN([C@@H]4[C@H](O)Cc5ccccc45)C2=O</chem>                                      | 56.41 | nM |
| CHEMBL88755   | <chem>CC(C)[C@@H]1[C@@H](CCS1(=O)=O)OC(=O)N[C@@H](Cc2ccccc2)[C@H](O)CN3CCN(C[C@H]3C(=O)NC(C)(C)C)C(C)C</chem>                                   | 57    | nM |
| CHEMBL9726    | <chem>CC(C)(C)OC(=O)N[C@@H](Cc1ccccc1)[C@H](O)[C@@H](O)[C@H](Cc2ccccc2)NC(=O)OC(C)(C)C</chem>                                                   | 57.97 | nM |
| CHEMBL107015  | <chem>CCNC(=O)[C@@H](NS(=O)(=O)Cc1ccccc1)[C@@H]2N[C@@H](C(=O)NCCNC(=O)[C@@H]3N[C@H](SC3(C)C)[C@H](NS(=O)(=O)Cc4ccccc4)C(=O)NCC)C(C)(C)S2</chem> | 58    | nM |
| CHEMBL71741   | <chem>CC(C)C(NC(=O)C[C@@H](C(=O)NC[C@@H](O)[C@H](Cc1ccccc1)NC(=O)OCc2ccccc2)C(C)(C)C)C(C)C</chem>                                               | 58    | nM |
| CHEMBL12257   | <chem>CC(C)c1ccccc1SC2=C(O)C=C(OC2=O)c3ccc(C)cc3</chem>                                                                                         | 59    | nM |
| CHEMBL34479   | <chem>CC(C)C1(CCc2ccc(O)cc2)CC(=O)C(=C(O)O1)Sc3cc(C)c(NC(=O)CC(C)(C)C)cc3C(C)(C)C</chem>                                                        | 60    | nM |
| CHEMBL421622  | <chem>OC1=C(SCCc2ccccc2)C(=O)CC(Cc3ccccc3)(O1)c4ccccc4</chem>                                                                                   | 60    | nM |
| CHEMBL292653  | <chem>CN1CCN(CCOC2ccc(C[C@H](NC(=O)OC(C)(C)C)[C@H](O)CNC[C@@H](O)[C@H](Cc3ccccc3)NC(=O)OC(C)(C)C)cc2)C1=O</chem>                                | 60    | nM |
| CHEMBL61670   | <chem>CC(C)(C)OC(=O)N[C@@H](Cc1ccccc1)[C@H](O)CNC[C@@H](O)[C@H](Cc2ccc(OCCOC3ccccc3)cc2)NC(=O)OC(C)(C)C</chem>                                  | 60    | nM |

|               |                                                                                                                                                   |       |    |
|---------------|---------------------------------------------------------------------------------------------------------------------------------------------------|-------|----|
| CHEMBL262764  | <chem>CC(C)(C)OC(=O)N[C@@H](Cc1ccccc1)[C@@H](O)C[C@@H](Cc2c<br/>cccc2)C(=O)N[C@@H](Cc3cc4cccc4[nH]3)C(=O)N</chem>                                 | 60    | nM |
| CHEMBL10725   | <chem>CC(C)(C)NC(=O)c1ccccc1[C@@H](O)[C@H](Cc2ccccc2)NC(=O)[C<br/>@H](CSc3ccc4cccc4n3)NS(=O)(=O)C</chem>                                          | 60    | nM |
| CHEMBL177011  | <chem>CC(C)(C)NC(=O)c1c(OC[C@@H](O)[C@H](Cc2ccccc2)NC(=O)[C@<br/>H](CC(=O)N)NC(=O)c3ccc4C(=O)c5ccccc5S(=O)(=O)c4c3)ccc6ccccc<br/>16</chem>        | 60    | nM |
| CHEMBL104525  | <chem>COC(=O)[C@@H](NC(=O)Cc1ccccc1)[C@@H]2N[C@@H](C(=O)N<br/>CCNC(=O)[C@@H]3N[C@H](SC3(C)C)[C@H](NC(=O)Cc4ccccc4)C<br/>(=O)OC)C(C)(C)S2</chem>   | 60    | nM |
| CHEMBL333738  | <chem>CC(C)(C)NC(=O)[C@@H]1C[C@@H]2CCCC[C@@H]2CN1C[C@H<br/>(O)CNC(=O)[C@@H]3N[C@H](SC3(C)C)C(NC(=O)Cc4ccccc4)C(=<br/>O)NCc5ccccc5</chem>          | 60.66 | nM |
| CHEMBL172724  | <chem>CC(C)(C)NC(=O)c1ccccc1OC[C@H](O)[C@H](Cc2ccccc2)NC(=O)[C<br/>@H](CC(=O)N)NC(=O)c3ccc4C(=O)c5ccccc5C(=O)c4c3</chem>                          | 60.75 | nM |
| CHEMBL50382   | <chem>CC(C)(C)OC(=O)N[C@@H](Cc1ccccc1)[C@H](O)CNC[C@@H](O)[<br/>C@H](Cc2ccccc2)NC(=O)C3(O)CCCC3(C)C</chem>                                        | 61.24 | nM |
| CHEMBL292791  | <chem>CC(C)(C)c1oc2ccccc2c1SC3=C(O)OC(CCc4ccccc4)(CC3=O)c5ccccc5</chem>                                                                           | 61.63 | nM |
| CHEMBL273234  | <chem>COC(=O)c1cc(ccc1O)C2=CC(=C(Sc3ccccc3C(C)C)C(=O)O2)O</chem>                                                                                  | 62    | nM |
| CHEMBL175385  | <chem>CC(C)(C)NC(=O)c1c(OC[C@@H](O)[C@H](Cc2ccccc2)NC(=O)[C@<br/>H](CC(=O)N)NC(=O)c3ccc4C(=O)c5ccccc5C(=O)c4c3)ccc6ccccc16</chem>                 | 62    | nM |
| CHEMBL323161  | <chem>COC(=O)N[C@@H](C(C)C)C(=O)N[C@@H](Cc1ccccc1)C(O)CN(Cc<br/>2ccc(cc2)C#N)NC(=O)[C@@H](NC(=O)OC)C(C)C</chem>                                   | 62    | nM |
| CHEMBL302532  | <chem>CC(C)[C@H](NC(=O)OCc1ccccc1)C(=O)N[C@@H](Cc2ccccc2)[C@<br/>H](O)CN3CCCC[C@H]3C(=O)NC(C)(C)C</chem>                                          | 62    | nM |
| CHEMBL105851  | <chem>CCNC(=O)[C@@H](NC(=O)Cc1ccccc1)[C@@H]2N[C@@H](C(=O)<br/>NCCNC(=O)[C@@H]3N[C@H](SC3(C)C)[C@H](NC(=O)Cc4ccccc4)<br/>C(=O)NCC)C(C)(C)S2</chem> | 62.45 | nM |
| CHEMBL297349  | <chem>C[C@H](C[C@H](O)[C@H](Cc1ccccc1)NC(=O)OC(C)(C)C(=O)N[<br/>C@@H]2[C@H](O)Cc3ccccc23</chem>                                                   | 62.7  | nM |
| CHEMBL110603  | <chem>CC(C)[C@@H](NC(=O)OCc1ccccc1)C(=O)N[C@@H](Cc2ccccc2)[C<br/>@H](O)[C@H](Cc3ccccc3)NC(=O)[C@@H](NC(=O)OCC4CCCCN4<br/>C)C(C)C</chem>           | 63    | nM |
| CHEMBL95467   | <chem>CC(C)(C)OC(=O)N[C@@H](Cc1ccccc1)[C@@H](O)C[C@@H](Cc2c<br/>cccc2)C(=O)N[C@@H](CC3CCCCC3)C(=O)N</chem>                                        | 64    | nM |
| CHEMBL61188   | <chem>CC(C)(C)OC(=O)N[C@@H](Cc1ccccc1)[C@H](O)CNC[C@@H](O)[<br/>C@H](Cc2ccc(OCCO)cc2)NC(=O)OC(C)(C)C</chem>                                       | 64    | nM |
| CHEMBL327087  | <chem>COCCOC(=O)NC(C(C)C)C(=O)NC(Cc1ccccc1)C(O)CN(CC2CCCCC2<br/>)NC(=O)C(NC(=O)OC)C(C)C</chem>                                                    | 64.45 | nM |
| CHEMBL97146   | <chem>CC(C)[C@@H](NC(=O)c1ccc2ccccc2n1)C(=O)NN(C[C@H](O)[C@H<br/>(Cc3ccccc3)NC(=O)[C@@H](NC(=O)c4ccc5ccccc5n4)C(C)C)Cc6ccc<br/>cc6</chem>         | 65    | nM |
| CHEMBL87806   | <chem>CCCC1(CCc2ccccc2)OC(=C(C(CC)c3cccc(NS(=O)(=O)c4ccc(cn4)[N+<br/>](=O)[O-])c3)C(=O)O1)O</chem>                                                | 65    | nM |
| CHEMBL322995  | <chem>CCOC(=O)NC(C(C)C)C(=O)N[C@@H](Cc1ccccc1)[C@H](O)CN(CC<br/>2CCCCC2)NC(=O)C(NC(=O)OC)C(C)C</chem>                                             | 65.24 | nM |
| CHEMBL275937  | <chem>CC(C)c1ccccc1SC2=C(O)C=C(OC2=O)c3ccccc(c3)[N+](=O)[O-]</chem>                                                                               | 67    | nM |
| CHEMBL92272   | <chem>CC(C)(C)OC(=O)N[C@@H](C[C@H](O)[C@H](Cc1ccccc1)NC(=O)c2c<br/>(Cl)cccc2Cl)Cc3ccccc3</chem>                                                   | 67    | nM |
| CHEMBL320343  | <chem>COCCOCCOC(=O)NC(C(C)C)C(=O)N[C@@H](Cc1ccccc1)[C@H](O<br/>)CN(CC2CCCCC2)NC(=O)C(NC(=O)OCCOCCOC)C(C)C</chem>                                  | 67    | nM |
| CHEMBL418902  | <chem>CC(C)(C)NC(=O)[C@@H]1C[C@@H]2CCCC[C@@H]2CN1C[C@@<br/>H](O)[C@H](Cc3ccccc3)NC(=O)[C@@H](NC(=O)c4ccc5ccccc5n4)C<br/>6CCOCC6</chem>            | 67.9  | nM |
| CHEMBL275560  | <chem>CC(C)c1ccccc1SC2=C(O)C=C(OC2=O)c3ccc(cc3)C(=O)O</chem>                                                                                      | 68    | nM |
| CHEMBL2111802 | <chem>CC(C)(C)NC(=O)[C@H]1CN(CCN1C[C@@H](O)CNC(=O)[C@@H]<br/>2N[C@H](SC2(C)C)C(NC(=O)Cc3ccccc3)C(=O)NCc4ccccc4)C(=O)O</chem>                      | 68.96 | nM |



|              |                                                                                                                                        |       |    |
|--------------|----------------------------------------------------------------------------------------------------------------------------------------|-------|----|
|              | c5cccc5                                                                                                                                |       |    |
| CHEMBL308845 | CC(C)[C@@H]1[C@@H](CCS1(=O)=O)OC(=O)N[C@@H](Cc2cccc2)[C@H](O)CN3CCN(Cc4cc(Cl)cc(Cl)c4)C[C@H]3C(=O)NC(C)(C)C                            | 69    | nM |
| CHEMBL412878 | CC(C)(C)NC(=O)[C@@H]1C[C@@H]2CCCC[C@@H]2CN1CC(O)C[C@@H](Cc3cccc3)C(=O)N[C@H]4CCCC[C@@H]4NC(=O)c5cc6cccc6cn5                            | 70    | nM |
| CHEMBL291155 | CC(C)(C)NC(=O)[C@@H]1C[C@@H]2CCCC[C@@H]2CN1CC(O)C[C@@H](Cc3cccc3)C(=O)N[C@H]4CCCC[C@@H]4NC(=O)c5ccc6cccc6n5                            | 70    | nM |
| CHEMBL305845 | CC(C)C1(CCc2c[nH]cn2)CC(=O)C(=C(O)O1)Sc3cc(C)c(CO)cc3C(C)(C)C                                                                          | 70    | nM |
| CHEMBL290749 | CC[C@H](C)[C@H](NC(=O)[C@H](Cc1cccc1)CC(O)(CO)CN2C[C@H]3CCCC[C@H]3C[C@H]2C(=O)NC(C)(C)C(=O)NCc4nc5cccc5[nH]4                           | 70    | nM |
| CHEMBL321789 | CC1(C)S[C@@H](N[C@H]1C(=O)NCCNC(=O)[C@@H]2N[C@H](SC2(C)C)[C@@H](COC(=O)c3cccc3)NC(=O)Cc4cccc4)[C@@H](COC(=O)c5cccc5)NC(=O)Cc6cccc6     | 70    | nM |
| CHEMBL159658 | CC(C)c1cccc1SC2=C(O)OC(CCCCC(=O)NCCc3cccc3)(CC2=O)c4cccc4                                                                              | 71    | nM |
| CHEMBL292276 | COCCOc1ccc(C[C@H](NC(=O)OC(C)(C)C)[C@H](O)CNC[C@@H](O)[C@H](Cc2cccc2)NC(=O)OC(C)(C)C)cc1                                               | 72    | nM |
| CHEMBL106282 | CCNC(=O)[C@@H](NC(=O)c1cccc1Cc2cccc2)[C@@H]3N[C@@H](C(=O)NCCNC(=O)[C@@H]4N[C@H](SC4(C)C)[C@H](NC(=O)c5cccc5Cc6cccc6)C(=O)NCC)C(C)(C)S3 | 72    | nM |
| CHEMBL339426 | Cc1cccc1SC2=C(O)OC(CCc3cccc3)(CC2=O)c4cccc4                                                                                            | 73    | nM |
| CHEMBL266620 | CCC(=O)N[C@@H](CC(=O)OCc1cccc1)C(=O)N[C@@H](Cc2cccc2)[C@H](O)Cc3cccc3C(=O)NC(C)(C)C                                                    | 73    | nM |
| CHEMBL64513  | Cc1c(SC2=C(O)OC(Cc3cccc3)(CC2=O)c4cccc4)sc5cccc15                                                                                      | 74    | nM |
| CHEMBL106623 | CC1(C)S[C@@H](N[C@H]1C(=O)NCCNC(=O)[C@@H]2N[C@H](SC2(C)C)[C@H](NC(=O)Cc3cccc3)C(=O)OCc4cccc4)[C@H](NC(=O)Cc5cccc5)C(=O)OCc6cccc6       | 75    | nM |
| CHEMBL41965  | CCCC[C@H](CC(O)C[C@@H](CCCC)C(=O)N[C@@H](C)C(=O)N[C@@H](C)C(=O)OC                                                                      | 75    | nM |
| CHEMBL12600  | CC(C)c1cccc1SC2=C(O)C=C(OC2=O)c3cccc(c3)C(F)(F)F                                                                                       | 76    | nM |
| CHEMBL275730 | CC(C)c1cccc1SC2=C(O)C=C(OC2=O)c3ccc(Cl)cc3                                                                                             | 76    | nM |
| CHEMBL76338  | CC(C)[C@@H]1[C@@H](CCS1(=O)=O)OC(=O)N[C@@H](Cc2cccc2)[C@H](O)CN3CCN(Cc4cc(C)cc(C)c4)C[C@H]3C(=O)NC(C)(C)C                              | 78    | nM |
| CHEMBL415758 | CC(C)(C)NC(=O)c1cccc1OC[C@@H](O)[C@H](Cc2cccc2)NC(=O)[C@H](CC(=O)N)NC(=O)c3nc4cccc4n3                                                  | 79.37 | nM |
| CHEMBL57069  | COc1cccc1C[C@@H](O)C[C@@H](Cc2cccc2)C(=O)N[C@@H]3[C@H](O)Cc4cccc34                                                                     | 80    | nM |
| CHEMBL289928 | CC[C@H](C)[C@H](NC(=O)[C@@H](CC(O)CN1CCC[C@@H]1C(=O)NC(C)(C)C)Cc2cccc2)C(=O)NCc3nc4cccc4[nH]3                                          | 80    | nM |
| CHEMBL293777 | CC(C)(C)NC(=O)[C@@H]1CCCCN1C[C@@H](O)C[C@@H](Cc2cccc2)C(=O)N[C@@H]3[C@H](O)Cc4cccc34                                                   | 80    | nM |
| CHEMBL293727 | CC(C)(C)OC(=O)N[C@@H](Cc1cccc1)[C@H](O)CNC[C@@H](O)[C@H](Cc2ccc(OCCCN3CCOCC3=O)cc2)NC(=O)OC(C)(C)C                                     | 80    | nM |
| CHEMBL13067  | COC(=O)c1cccc(c1)C2=CC(=C(Sc3cccc3C(C)C)C(=O)O2)O                                                                                      | 80    | nM |
| CHEMBL171148 | O[C@@H]1[C@@H](O)[C@@H](COc2cccc2)N(Cc3cccc3)C(=O)N(Cc4cccc4)[C@@H]1COc5cccc5                                                          | 80    | nM |
| CHEMBL159602 | CC(C)c1cccc1SC2=C(O)OC(CCCCC(=O)NCc3cccc3)(CC2=O)c4cccc4                                                                               | 81    | nM |
| CHEMBL440834 | COc1ccc(cc1)C2=CC(=C(Sc3cccc3C(C)C)C(=O)O2)O                                                                                           | 83    | nM |
| CHEMBL170804 | OC1=C(C(CC2CC2)SCc3cccc3)C(=O)C=C(O1)c4cccc4                                                                                           | 84    | nM |
| CHEMBL347431 | CC(C)CCN(C[C@@H](O)[C@H](Cc1cccc1)NC(=O)OCc2cccc2)S(=                                                                                  | 84.85 | nM |

|              |                                                                                                                                       |       |    |
|--------------|---------------------------------------------------------------------------------------------------------------------------------------|-------|----|
|              | O)(=O)c3ccccc3                                                                                                                        |       |    |
| CHEMBL64701  | CC(C)(C)OC(=O)N[C@@H](Cc1ccccc1)[C@H](O)CNC[C@@H](O)[C@H](Cc2ccc(CCC(=O)N3CCOCC3)cc2)NC(=O)OC(C)(C)C                                  | 85    | nM |
| CHEMBL11193  | CC(=O)N[C@@H](CC(=O)OCc1ccccc1)C(=O)N[C@@H](Cc2ccccc2)[C@H](O)Cc3ccccc3C(=O)NC(C)(C)C                                                 | 85    | nM |
| CHEMBL330620 | CC(C)CN(C[C@@H](O)[C@H](Cc1ccccc1)NC(=O)[C@@H](CSc2cc(F)cc2)NS(=O)(=O)C)C(=O)NC(C)(C)C                                                | 85    | nM |
| CHEMBL62133  | CC(C)(C)OC(=O)N[C@@H](Cc1ccccc1)[C@H](O)CNC[C@@H](O)[C@H](Cc2ccc(OCCCN3CCOCC3)cc2)NC(=O)OC(C)(C)C                                     | 86    | nM |
| CHEMBL122031 | CCCCCCCNC(=O)C(NC(=O)Cc1ccccc1)[C@@H]2N[C@@H](C(=O)NCC(O)CN3C[C@H]4CCCC[C@H]4C[C@H]3C(=O)NC(C)(C)C(C)(C)S2                            | 86    | nM |
| CHEMBL430984 | CC(C)(C)NC(=O)[C@@H]1CC2CCCC2CN1C[C@@H](O)[C@@H]3C4ccc(OCCCCO)c5cc6ccccc6cc5C(=O)N[C@@H](CC(=O)N)C(=O)N3)cc4                          | 88    | nM |
| CHEMBL164110 | CCCCC1(CC(=O)C(=C(O)O1)Sc2ccccc2C(C)C)c3ccccc3                                                                                        | 88    | nM |
| CHEMBL170195 | CC(C)(C)NC(=O)[C@@H]1C[C@@H]2CCCC[C@@H]2CN1C[C@@H](O)[C@H](Cc3ccccc3)NC(=O)[C@@H]4CCCCSC4                                             | 88.01 | nM |
| CHEMBL340472 | Cc1ccc(c(SC2=C(O)C=C(OC2=O)c3ccccc3)c1)C(C)(C)C                                                                                       | 88.86 | nM |
| CHEMBL12408  | CC(C)c1ccccc1SC2=C(O)C=C(OC2=O)c3ccccc(O)c3                                                                                           | 89    | nM |
| CHEMBL63717  | CC(C)(C)OC(=O)N[C@@H](Cc1ccccc1)C(=O)N2CCC(=O)[C@@H]2Sc3ccccc3                                                                        | 89.44 | nM |
| CHEMBL355533 | CC(C)(C)NC(=O)c1ccccc1SC[C@@H](O)[C@H](Cc2ccccc2)NC(=O)[C@H](CC(=O)N)NC(=O)c3ccc4ccccc4n3                                             | 90    | nM |
| CHEMBL304249 | CC(C)(C)OC(=O)N[C@@H](Cc1ccccc1)[C@H](O)CNC[C@@H](O)[C@H](Cc2ccc(OCC(=O)N3CCCC3)cc2)NC(=O)OC(C)(C)C                                   | 90    | nM |
| CHEMBL304231 | CC(C)(C)OC(=O)N[C@@H](Cc1ccccc1)[C@H](O)CNC[C@@H](O)[C@H](Cc2ccc(OCCn3ccnc3)cc2)NC(=O)OC(C)(C)C                                       | 90    | nM |
| CHEMBL35215  | CCCC[C@H](CC(O)C[C@@H](CCCC)C(=O)N[C@@H](CC(C)C)C(=O)N[C@@H](Cc1ccccc1)C(=O)OC)C(=O)N[C@@H](CC(C)C)C(=O)N[C@@H](Cc2ccccc2)C(=O)OC     | 90    | nM |
| CHEMBL423628 | CC(C)c1ccccc1SC2=C(O)OC(CCCCC(=O)Nc3ccccc3)(CC2=O)c4cccc4                                                                             | 91    | nM |
| CHEMBL286861 | CC(C)C1(CCc2ccc(O)cc2)CC(=O)C(=C(O)O1)Sc3cc(C)c(NC(=O)OC(C)(C)C)cc3C(C)(C)C                                                           | 91    | nM |
| CHEMBL156424 | CC(C)CCN(C[C@@H](O)[C@H](Cc1ccccc1)NC(=O)OCc2ccccc2)S(=O)(=O)c3ccccc(Cl)c3                                                            | 92    | nM |
| CHEMBL163941 | CC(C)c1ccccc1SC2=C(O)OC(CCCCC(=O)N)(CC2=O)c3ccccc3                                                                                    | 92    | nM |
| CHEMBL174803 | CC(C)(C)NC(=O)c1ccccc1NC[C@@H](O)[C@H](Cc2ccccc2)NC(=O)[C@H](CC(=O)N)NC(=O)c3ccc4ccccc4n3                                             | 94    | nM |
| CHEMBL18031  | C[C@@H]1OCC[C@@H]1OC(=O)N[C@@H](Cc2ccccc2)[C@H](O)CN3C[C@H]4CCCC[C@H]4C[C@H]3C(=O)NC(C)(C)C                                           | 94.1  | nM |
| CHEMBL322171 | CC(C)[C@H](NC(=O)OCc1ccccc1)C(=O)N[C@@H](Cc2ccccc2)[C@H](O)CN(CC3CCCC3)NC(=O)[C@@H](NC(=O)OCc4ccccc4)C(C)C                            | 95    | nM |
| CHEMBL57987  | CSc1ccccc1C[C@@H](O)C[C@@H](Cc2ccccc2)C(=O)N[C@@H]3[C@H](O)Cc4ccccc4                                                                  | 95    | nM |
| CHEMBL325764 | CC1(C)S[C@@H](N[C@H]1C(=O)N[C@H](Cc2ccccc2)[C@H](O)CC(=O)NCC(O)CO)[C@H](NC(=O)Cc3ccccc3)C(=O)NCc4ccccc4                               | 95    | nM |
| CHEMBL320243 | CC(C)[C@@H](NS(=O)(=O)N(C)Cc1ccccc1)C(=O)N[C@@H](Cc2ccccc2)[C@H](O)[C@H](O)[C@H](Cc3ccccc3)NC(=O)[C@@H](NS(=O)(=O)N(C)Cc4ccccc4)C(C)C | 95.5  | nM |
| CHEMBL201216 | CC(C)(C)CC(=O)N[C@@H](Cc1ccccc1)[C@@H](O)C[C@@]2(Cc3cccc3)N=CC(=C2O)C4C5OC(=O)N[C@@H]5c6ccccc46                                       | 96    | nM |
| CHEMBL123513 | CC(C)CCC1(CC(=O)C(=C(O)O1)SCC2ccccc2)c3ccccc3                                                                                         | 96    | nM |
| CHEMBL127754 | CCCCCCC1(CC(=O)C(=C(O)O1)SCC2ccccc2)c3ccccc3                                                                                          | 96.99 | nM |



|               |                                                                                                                                                                                                    |        |    |
|---------------|----------------------------------------------------------------------------------------------------------------------------------------------------------------------------------------------------|--------|----|
|               | H](O)[C@H](Cc3ccccc3)NC(=O)O[C@@H]4COCC=C4                                                                                                                                                         |        |    |
| CHEMBL275301  | CC(C)c1ccccc1SC2=C(O)C=C(OC2=O)c3ccc(F)cc3                                                                                                                                                         | 124    | nM |
| CHEMBL274027  | CC(C)c1ccccc1SC2=C(O)OC(CCCC(=O)N3CCN(CC3)C(=O)OC(C)(C)C)(CC2=O)c4ccccc4                                                                                                                           | 124    | nM |
| CHEMBL110557  | CCOC(=O)NC(C(C)C)C(=O)NN(C[C@H](O)[C@H](Cc1ccccc1)NC(=O)[C@H](CC(=O)N)NC(=O)c2ccc3ccccc3n2)CC4CCCCC4                                                                                               | 126    | nM |
| CHEMBL100034  | CCCCNC(=O)N(CC(C)C)C[C@@H](O)[C@H](Cc1ccccc1)NC(=O)[C@H](CC(=O)N)NC(=O)c2ccc3ccccc3n2                                                                                                              | 126    | nM |
| CHEMBL317103  | CC(C)(C)NC(=O)[C@@H]1C[C@@H]2CCCC[C@@H]2CN1C[C@@H](O)[C@H](Cc3ccccc3)NC(=O)OCc4ccccc4                                                                                                              | 127    | nM |
| CHEMBL162769  | CC(C)c1ccccc1SC2=C(O)OC(CCCCC(=O)N3CCN(CC3)C(=O)OC(C)(C)C)(CC2=O)c4ccccc4                                                                                                                          | 127    | nM |
| CHEMBL309582  | CC(C)[C@@H]1[C@@H](CCS1(=O)=O)OC(=O)N[C@@H](Cc2ccccc2)[C@H](O)CN3CCN(Cc4ccccc(O)c4)C[C@H]3C(=O)NC(C)(C)C[C@H](O)C(C)(C)OC(=O)N[C@@H](Cc1ccccc1)[C@H](O)CNC[C@@H](O)[C@H](Cc2ccccc2)NC(=O)OC(C)(C)C | 127    | nM |
| CHEMBL343727  | OC1=C(Sc2ccccc2)C(=O)CC(CCc3ccccc3)(O1)c4ccccc4                                                                                                                                                    | 129.61 | nM |
| CHEMBL339288  | CC[C@H](C)[C@H](NC(=O)[C@@H](CC(O)CN1C[C@H]2CCCC[C@H]2C[C@H]1C(=O)NC(C)(C)C)Cc3ccccc3)C(=O)NCCc4nc5ccccc5[nH]4                                                                                     | 130    | nM |
| CHEMBL41789   | CC(C)(C)OC(=O)N[C@@H](Cc1ccccc1)[C@H](O)CNC[C@@H](O)[C@H](Cc2ccc3ncccc3c2)NC(=O)OC(C)(C)C                                                                                                          | 130    | nM |
| CHEMBL294261  | CC(C)(C)OC(=O)N[C@@H](Cc1ccccc1)[C@H](O)CNC[C@@H](O)[C@H](Cc2ccccc2)NC(=O)C(C)(O)C(C)(C)CO                                                                                                         | 130    | nM |
| CHEMBL45699   | Cc1cc(SC2=C(O)OC(CCc3ccc(O)cc3)(CC2=O)C4CCCCC4)c(cc1OS(=O)(=O)c5ccccc5)C(C)(C)C                                                                                                                    | 131    | nM |
| CHEMBL355438  | CC(C)(C)NC(=O)[C@@H]1CN(CCN1C[C@@H](O)[C@H](Cc2ccccc2)NC(=O)O[C@H]3CCOC3)C(=O)c4cncnc4                                                                                                             | 132    | nM |
| CHEMBL308837  | CC(C)(C)NC(=O)C1N(C[C@H](O)CNC(=O)[C@@H]2N[C@H](SC2(C)C)C(NC(=O)Cc3ccccc3)C(=O)NCc4ccccc4)C(C)(C)SC1(C)C                                                                                           | 132.93 | nM |
| CHEMBL331232  | CC(C)(C)[C@@H](CC(=O)NC1CCCCC1)C(=O)NC[C@@H](O)[C@H](Cc2ccccc2)NC(=O)OCc3ccccc3                                                                                                                    | 135    | nM |
| CHEMBL422408  | CC(C)c1ccccc1SC2=C(O)C=C(OC2=O)c3ccc(cc3)C(=O)N                                                                                                                                                    | 135    | nM |
| CHEMBL273732  | CC(C)CC(SC1CCCCC1)C2=C(O)C=C(OC2=O)c3ccccc3                                                                                                                                                        | 136.24 | nM |
| CHEMBL353836  | CC[C@H](C)[C@H](NC(=O)[C@H](Cc1ccccc1)CC(O)(CO)CN(CC2CCCC2)CC(=O)NC(C)(C)C)C(=O)NCc3nc4ccccc4[nH]3                                                                                                 | 140    | nM |
| CHEMBL40291   | CC(C)(C)OC(=O)N[C@@H](Cc1ccccc1)[C@H](O)CNC[C@@H](O)[C@H](Cc2ccccc(O)Cc3ccccc3)c2)NC(=O)OC(C)(C)C                                                                                                  | 140    | nM |
| CHEMBL63319   | CC(C)[C@H](NC(=O)OCc1ccccc1)C(=O)N[C@@H](Cc2ccccc2)[C@H](O)CNC(=O)C3CCCC[C@H]3C(=O)NC(C)(C)C                                                                                                       | 140    | nM |
| CHEMBL308693  | CC1(C)S[C@@H](N[C@H]1C(=O)NCCNC(=O)[C@@H]2N[C@H](SC2(C)C)[C@@H](CO)NC(=O)Cc3ccccc3)[C@@H](CO)NC(=O)Cc4ccccc4                                                                                       | 140    | nM |
| CHEMBL107250  | CCC[C@]1(CCc2ccccc2)CC(=O)C(=C(O)O1)[C@H](CC)c3cccc(NS(=O)(=O)c4ccc(cn4)C(F)(F)F)c3                                                                                                                | 140    | nM |
| CHEMBL2112563 | CCOC(=O)NC(C(C)C)C(=O)NN(C[C@@H](O)[C@H](Cc1ccccc1)NC(=O)C(NC(=O)OCCOC)C(C)C)CC2CCCCC2                                                                                                             | 141.77 | nM |
| CHEMBL107701  | CC(C)(C)OC(=O)N[C@H](C[C@H](O)[C@H](Cc1ccccc1)NC(=O)c2ccccc2O)Cc3ccccc3                                                                                                                            | 145    | nM |
| CHEMBL91557   | CC1(C)S[C@@H](N[C@H]1C(=O)N[C@H](Cc2ccccc2)[C@H](O)CC(=O)NCc3ccccc3)C(NC(=O)Cc4ccccc4)C(=O)NCc5ccccc5                                                                                              | 145.46 | nM |
| CHEMBL334057  | CC(C)c1ccccc1SC2=C(O)OC(CCCCC(=O)NCCc3ccccc3)(CC2=O)c4ccccc4                                                                                                                                       | 146    | nM |
| CHEMBL163390  | CCOC(=O)c1cc(ccc1O)C2=CC(=C(Sc3ccccc3C(C)C)C(=O)O2)O                                                                                                                                               | 148    | nM |
| CHEMBL13036   | CC(C)(C)NC(=O)c1cc2ccccc2cc1C[C@@H](O)[C@H](Cc3ccccc3)NC(=O)[C@H](CC(=O)N)NC(=O)c4ccc5ccccc5n4                                                                                                     | 149    | nM |
| CHEMBL28462   |                                                                                                                                                                                                    |        |    |

|              |                                                                                                                                                           |        |    |
|--------------|-----------------------------------------------------------------------------------------------------------------------------------------------------------|--------|----|
| CHEMBL293525 | <chem>CC(C)(C)OC(=O)N[C@@H](Cc1ccccc1)[C@H](O)CNC[C@@H](O)[C@H](Cc2ccc(OCC(=O)O)cc2)NC(=O)OC(C)(C)C</chem>                                                | 150    | nM |
| CHEMBL43739  | <chem>CC[C@H](C)[C@H](NC(=O)[C@@H](CC(O)CN1C[C@H]2CCCC[C@H]2C[C@H]1C(=O)NC(C)(C)Cc3ccccc3)C(=O)NCc4cccn4</chem>                                           | 150    | nM |
| CHEMBL318814 | <chem>CC1(C)S[C@@H](N[C@H]1C(=O)N[C@@H](CO)Cc2ccccc2)[C@H](NC(=O)Cc3ccccc3)C(=O)NCc4ccccc4</chem>                                                         | 150    | nM |
| CHEMBL13037  | <chem>CC(C)c1ccccc1SC2=C(O)C=C(OC2=O)c3ccccc3)C(=O)O</chem>                                                                                               | 151    | nM |
| CHEMBL115292 | <chem>CC(C)(C)OC(=O)[C@@H]1CCCN1C[C@H](O)[C@H](Cc2ccccc2)NC(=O)[C@H](CC(=O)N)NC(=O)OCc3ccccc3</chem>                                                      | 151.49 | nM |
| CHEMBL124731 | <chem>OC1=C(SCCc2ccccc2)C(=O)CC(O1)(c3ccccc3)c4ccccc4</chem>                                                                                              | 152    | nM |
| CHEMBL74699  | <chem>CC(C)(C)NC(=O)[C@@H]1CN(Cc2ccc(O)cc2)CCN1C[C@@H](O)[C@H](Cc3ccccc3)NC(=O)O[C@H]4CCOC4</chem>                                                        | 153    | nM |
| CHEMBL419595 | <chem>CC(C)CCCC1(CC(=O)C=C(O)O1)SCCc2ccccc2)c3ccccc3</chem>                                                                                               | 155    | nM |
| CHEMBL125827 | <chem>CC(C)(C)NC(=O)[C@@H]1C[C@@H]2CCCC[C@@H]2CN1CC(O)CNC(=O)[C@@H]3N[C@H](SC3(C)C)C(NC(=O)Cc4ccccc4)C(=O)NCNC(=O)OC(C)(C)C</chem>                        | 160    | nM |
| CHEMBL106965 | <chem>CCNC(=O)[C@@H](NC(=O)c1ccccc1O)c2ccccc2)[C@@H]3N[C@@H](C(=O)NCCNC(=O)[C@@H]4N[C@H](SC4(C)C)[C@H](NC(=O)c5ccccc5O)c6ccccc6)C(=O)NCC)C(C)(C)S3</chem> | 160    | nM |
| CHEMBL316766 | <chem>CC(C)[C@H](NC(=O)C(O)(c1ccccc1)c2ccccc2)C(=O)N[C@H](C[C@H](O)[C@H](Cc3ccccc3)NC(=O)[C@@H](NC(=O)C(O)(c4ccccc4)c5ccccc5)C(C)C)Cc6ccccc6</chem>       | 160    | nM |
| CHEMBL12844  | <chem>CC(C)c1ccccc1SC2=C(O)C=C(OC2=O)c3ccccc3</chem>                                                                                                      | 160.93 | nM |
| CHEMBL108429 | <chem>COCCOC(=O)NC(C(C)C)C(=O)N[C@@H](Cc1ccccc1)[C@H](O)CN(CC2CCCC2)NC(=O)C(NC(=O)OCCOC)C(C)C</chem>                                                      | 164    | nM |
| CHEMBL354379 | <chem>CC(C)(C)NC(=O)[C@@H]1C[C@@H]2CCCC[C@@H]2CN1C[C@@H](O)[C@H](Cc3ccccc3)NC(=O)C4=CCCSC4</chem>                                                         | 167.4  | nM |
| CHEMBL276653 | <chem>CC(C)(C)NC(=O)c1ccccc1C[C@@H](O)[C@H](Cc2ccccc2)NC(=O)[C@H](CSc3ccc(cc3)C(F)(F)F)NS(=O)(=O)C</chem>                                                 | 170    | nM |
| CHEMBL277725 | <chem>CC(C)(C)NC(=O)[C@@H]1C[C@@H]2CCCC[C@@H]2CN1C[C@@H](O)[C@H](Cc3ccccc3)NC(=O)O[C@H]4CCSC4</chem>                                                      | 170.41 | nM |
| CHEMBL124672 | <chem>OC1=C(SCc2ccccc2)C(=O)CC(CO)c3ccccc3)(O1)c4ccccc4</chem>                                                                                            | 172    | nM |
| CHEMBL72784  | <chem>CC(C)(C)NC(=O)[C@@H]1CN(CCCc2ccccc2)CCN1C[C@@H](O)[C@H](Cc3ccccc3)NC(=O)O[C@H]4CCOC4</chem>                                                         | 175    | nM |
| CHEMBL97544  | <chem>CC(C)C[C@@H](NC(=O)[C@@H](C[C@H](O)[C@H](Cc1ccccc1)NC(=O)OC(C)(C)C)Cc2ccccc2)C(=O)N</chem>                                                          | 176.07 | nM |
| CHEMBL432252 | <chem>CCOC(=O)NC(C(C)C)C(=O)N[C@@H](Cc1ccccc1)[C@H](O)CN(CC2CCCC2)NC(=O)C(NC(=O)OCC)C(C)C</chem>                                                          | 177    | nM |
| CHEMBL316959 | <chem>CC1(C)S[C@@H](N[C@H]1C(=O)N[C@H](Cc2ccccc2)[C@H](O)CC(=O)N[C@H](CO)c3ccccc3)[C@H](NC(=O)Cc4ccccc4)C(=O)NCc5ccccc5</chem>                            | 179.72 | nM |
| CHEMBL325847 | <chem>CC(C)[C@@H](NC(=O)OCCN1CCOCC1)C(=O)N[C@@H](Cc2ccccc2)C(O)[C@H](Cc3ccccc3)NC(=O)[C@@H](NC(=O)OCCN4CCOCC4)C(C)C</chem>                                | 180    | nM |
| CHEMBL123324 | <chem>CC(C)CCCC1(CC(=O)C=C(O)O1)SCc2ccccc2)c3ccccc3</chem>                                                                                                | 183    | nM |
| CHEMBL163633 | <chem>CC(C)c1ccccc1SC2=C(O)OC(CCCC(=O)N3CCOCC3)(CC2=O)c4ccccc4</chem>                                                                                     | 186    | nM |
| CHEMBL606565 | <chem>CN([C@@H]1[C@H](O)Cc2ccccc12)C(=O)[C@@H](C[C@H](O)[C@H](Cc3ccccc3)NC(=O)OC(C)(C)C)Cc4ccccc4</chem>                                                  | 186    | nM |
| CHEMBL288759 | <chem>CC(C)(C)OC(=O)N[C@@H](Cc1ccccc1)[C@H](O)CNC[C@@H](O)[C@H](Cc2ccccc2)NC(=O)[C@@](C)(O)C(C)(C)C</chem>                                                | 189.74 | nM |
| CHEMBL15053  | <chem>CC(C)(C)NC(=O)c1ccccc1CSC2=C(O)C=C(OC2=O)c3ccccc3</chem>                                                                                            | 190    | nM |
| CHEMBL154197 | <chem>O[C@H](CN(Cc1ccccc1)S(=O)(=O)c2ccccc2)[C@H](Cc3ccccc3)NC(=O)OCc4ccccc4</chem>                                                                       | 190    | nM |
| CHEMBL141398 | <chem>COc1ccc(cc1)S(=O)(=O)N(CC(C)C)C[C@@H](O)[C@H](Cc2ccccc2)NC(=O)c3ccccc3OC</chem>                                                                     | 190    | nM |

|               |                                                                                                                                           |        |    |
|---------------|-------------------------------------------------------------------------------------------------------------------------------------------|--------|----|
| CHEMBL12671   | <chem>CC(C)c1ccccc1SC2=C(O)C=C(OC2=O)c3ccc(cc3)[N+](=O)[O-]</chem>                                                                        | 191    | nM |
| CHEMBL318595  | <chem>CC1(C)S[C@@H](N[C@H]1C(=O)N[C@H](Cc2ccccc2)[C@H](O)CC(=O)N[C@H](CO)Cc3ccccc3)[C@H](NC(=O)Cc4ccccc4)C(=O)NCc5ccccc5</chem>           | 193.39 | nM |
| CHEMBL162317  | <chem>CC(C)c1ccccc1SC2=C(O)OC(CCCCC(=O)N3CCOCC3)(CC2=O)c4cccc4</chem>                                                                     | 195    | nM |
| CHEMBL62390   | <chem>Cc1ccsc1SC2=C(O)OC(CCCc3ccccc3)(CC2=O)c4ccccc4</chem>                                                                               | 195    | nM |
| CHEMBL354169  | <chem>CC(C)(C)NC(=O)[C@@H]1C[C@@H]2CCCC[C@@H]2CN1C[C@@H](O)[C@H](Cc3ccccc3)NC(=O)[C@@H]4CCS(=O)(=O)C4</chem>                              | 196.47 | nM |
| CHEMBL71514   | <chem>CC(C)C(NC(=O)OCc1ccccc1)C(=O)N[C@H](CC[C@@H](O)[C@H](Cc2ccccc2)NC(=O)C(NC(=O)OCc3ccccc3)C(C)C)Cc4ccccc4</chem>                      | 200    | nM |
| CHEMBL130998  | <chem>O[C@@H]1[C@@H](O)[C@@H](COc2ccccc2)N(Cc3ccccc3)S(=O)(=O)N(Cc4ccccc4)[C@@H]1COc5ccccc5</chem>                                        | 200    | nM |
| CHEMBL356345  | <chem>CC(C)(C)OC(=O)N[C@@H](Cc1ccccc1)[C@H](O)CNC[C@@H](O)[C@H](Cc2ccccc2)NC(=O)OC(C)(C)CCO</chem>                                        | 200    | nM |
| CHEMBL121005  | <chem>OC(C(COCc1ccccc1F)OCc2ccc(F)cc2)C(O)C(COCc3ccccc3F)OCc4ccc(F)cc4</chem>                                                             | 200    | nM |
| CHEMBL292423  | <chem>CC(C)(C)OC(=O)N[C@@H](Cc1ccccc1)[C@H](O)CNC[C@@H](O)[C@H](Cc2ccccc2)NC(=O)OC(C)(C)C</chem>                                          | 200    | nM |
| CHEMBL142990  | <chem>CC(C)(C)OC(=O)N[C@@H](Cc1ccccc1)[C@H](O)CNC[C@@H](O)[C@H](Cc2ccccc2)NC(=O)OC(C)(CO)CO</chem>                                        | 200    | nM |
| CHEMBL170517  | <chem>O[C@@H]1[C@@H](O)[C@@H](CCc2ccccc2)N(Cc3ccccc3)S(=O)(=O)N(Cc4ccccc4)[C@@H]1CCc5ccccc5</chem>                                        | 200    | nM |
| CHEMBL125097  | <chem>CCCCC1(CC(=O)C(=C(O)O1)SCc2ccccc2)c3ccccc3</chem>                                                                                   | 201.37 | nM |
| CHEMBL12485   | <chem>CC(C)c1ccccc1SC2=C(O)C=C(OC2=O)c3ccc(cc3)C#N</chem>                                                                                 | 205    | nM |
| CHEMBL405657  | <chem>CC(C)(C)NC(=O)[C@@H]1C[C@@H]2CCC[C@@H]2CN1C[C@@H](O)[C@H](Cc3ccccc3)NC(=O)O[C@H]4CCOC4</chem>                                       | 205.75 | nM |
| CHEMBL267553  | <chem>Cc1ccccc1COC(=O)N[C@@H](Cc2ccccc2)[C@H](O)CN3CC[C@H](C[C@H]3C(=O)NC(C)(C)C)OCc4ccccc4</chem>                                        | 210    | nM |
| CHEMBL3349988 | <chem>CC(C)(C)NC(=O)[C@@H]1CCCN1C[C@@H](O)[C@H](Cc2ccccc2)NC(=O)[C@H](CC(=O)N)NC(=O)OCc3ccccc3</chem>                                     | 210    | nM |
| CHEMBL155051  | <chem>CCCS(=O)(=O)N(CCC(C)C)C[C@@H](O)[C@H](Cc1ccccc1)NC(=O)OCc2ccccc2</chem>                                                             | 210    | nM |
| CHEMBL71913   | <chem>CC(C)[C@H](NC(=O)[C@H](Cc1ccc(O)cc1)NC(=O)[C@H](O)[C@H](Cc2ccccc2)NC(=O)[C@@H](NC(=O)[C@H](Cc3ccc(O)cc3)NC(=O)C)C(C)C)C(=O)N</chem> | 212    | nM |
| CHEMBL351243  | <chem>CC(C)c1ccccc1SC2=C(O)OC(CCCC(=O)N(C)CCc3ccccc3)(CC2=O)c4cccc4</chem>                                                                | 216    | nM |
| CHEMBL141265  | <chem>CC(C)CN(C[C@@H](O)[C@H](Cc1ccccc1)NC(=O)OCc2ccccc2)S(=O)(=O)c3ccccc3</chem>                                                         | 219.09 | nM |
| CHEMBL11008   | <chem>CC(=O)N[C@@H](CS1ccccc1)C(=O)N[C@@H](Cc2ccccc2)[C@H](O)Cc3ccccc3C(=O)NC(C)(C)C</chem>                                               | 220    | nM |
| CHEMBL273775  | <chem>CC(C)[C@H](NC(=O)OCc1ccccc1)C(=O)N[C@@H](Cc2ccccc2)[C@]3(O)CCN(C3)[C@@H](Cc4ccccc4)C(=O)N[C@@H]5[C@H](O)Cc6ccccc56</chem>           | 220    | nM |
| CHEMBL353679  | <chem>OC1=C(C(SC2CCCC2)C3CCCC3)C(=O)C=C(O1)c4ccccc4</chem>                                                                                | 225    | nM |
| CHEMBL12707   | <chem>CC(C)c1ccccc1SC2=C(O)C=C(OC2=O)c3ccccc3Cl</chem>                                                                                    | 225    | nM |
| CHEMBL143415  | <chem>CC(C)(C)OC(=O)N[C@@H](Cc1ccccc1)[C@H](O)CNC[C@@H](O)[C@H](Cc2ccccc2)NC(=O)OCCO</chem>                                               | 230    | nM |
| CHEMBL2111769 | <chem>CCC[C@@]1(CCc2ccccc2)CC(=O)C(=C(O)O1)[C@@H](CC)c3cccc(NS(=O)(=O)c4ccc(cn4)C#N)c3</chem>                                             | 232.16 | nM |
| CHEMBL423618  | <chem>CC(C)c1ccccc1SC2=C(O)OC(CCCCC(=O)N3CCNCC3)(CC2=O)c4cccc4</chem>                                                                     | 234    | nM |
| CHEMBL90645   | <chem>CC(C)[C@@H]1[C@@H](CCS1(=O)=O)OC(=O)N[C@@H](Cc2cccc2)[C@H](O)CN3CCN(C[C@H]3C(=O)NC(C)(C)C)C4CCSCC4</chem>                           | 238    | nM |
| CHEMBL14889   | <chem>OC1=C(SCc2ccccc2C(=O)OC3CCCCC3)C(=O)C=C(O1)c4ccccc4</chem>                                                                          | 244.95 | nM |

|               |                                                                                                                        |        |    |
|---------------|------------------------------------------------------------------------------------------------------------------------|--------|----|
| CHEMBL99317   | <chem>CC(C)CN(C[C@H](O)[C@H](Cc1cccc1)NC(=O)[C@H](CC(=O)N)NC(=O)c2ccc3ccccc3n2)C(=O)NC(C)(C)C</chem>                   | 244.95 | nM |
| CHEMBL48917   | <chem>CC(C)(C)OC(=O)N[C@@H](Cc1cccc1)[C@H](O)CNC[C@@H](O)[C@H](Cc2ccccc2)NC(=O)[C@H](O)C(C)(C)C</chem>                 | 244.95 | nM |
| CHEMBL42366   | <chem>CC[C@H](C)[C@H](NC(=O)[C@@H](CC(O)CN1CCCC1C(=O)NC(C)(C)Cc2ccccc2)C(=O)NCc3ccccc3</chem>                          | 250    | nM |
| CHEMBL93389   | <chem>CC(C)(C)OC(=O)N[C@H](C[C@H](O)[C@H](Cc1cccc1)NC(=O)c2cc(N)cc(N)c2)Cc3ccccc3</chem>                               | 250    | nM |
| CHEMBL14437   | <chem>Cc1cc(cc(C)c1O)C2=CC(=C(SCc3ccccc3)C(=O)O2)O</chem>                                                              | 250    | nM |
| CHEMBL319188  | <chem>CCCC(CO)NC(=O)[C@@H]1N[C@H](SC1(C)C)[C@H](NC(=O)Cc2ccccc2)C(=O)NCc3ccccc3</chem>                                 | 250    | nM |
| CHEMBL71646   | <chem>CC(C)[C@@H]1NC(=O)[C@H](Cc2ccc(OCCNC1=O)cc2)NC(=O)[C@H](O)[C@H](Cc3ccccc3)NC(=O)OC(C)(C)C</chem>                 | 251    | nM |
| CHEMBL174527  | <chem>CC(C)(C)NC(=O)c1cccc1OC[C@@H](O)[C@H](Cc2ccccc2)NC(=O)[C@H](CC(=O)N)NC(=O)c3cnnc4ccccc34</chem>                  | 254.95 | nM |
| CHEMBL76460   | <chem>CC(C)(C)NC(=O)[C@@H]1CN(CCN1C[C@@H](O)[C@H](Cc2ccccc2)NC(=O)O[C@H]3CCOC3)C(=O)c4ccccc4</chem>                    | 257    | nM |
| CHEMBL295472  | <chem>OP1(=O)C(Cc2ccccc2)N(Cc3ccc4ccccc4c3)C(=O)N(Cc5ccc6ccccc6c5)C1Cc7ccccc7</chem>                                   | 260    | nM |
| CHEMBL13205   | <chem>CC(C)(C)NC(=O)[C@@H]1C[C@@H](CCN1C[C@@H](O)[C@H](Cc2ccccc2)NC(=O)O[C@@H]3CCOC3)OCc4ccccc4</chem>                 | 260    | nM |
| CHEMBL317077  | <chem>CC(C)CN(C[C@@H](O)[C@H](Cc1cccc1)NC(=O)[C@H](CC(=O)N)NC(=O)OCc2ccccc2)C(=O)NC(C)C</chem>                         | 260    | nM |
| CHEMBL14751   | <chem>Cc1cc(C)cc(c1)C2=CC(=C(SCc3ccccc3)C(=O)O2)O</chem>                                                               | 260    | nM |
| CHEMBL171551  | <chem>CC(C)CC(SCc1cccc1)C2=C(O)C=C(OC2=O)c3ccccc3</chem>                                                               | 260    | nM |
| CHEMBL125948  | <chem>OC1=C(SCc2ccccc2)C(=O)CC(O1)(c3ccccc3)c4ccccc4</chem>                                                            | 262    | nM |
| CHEMBL12229   | <chem>CCc1cccc(c1)C2=CC(=C(Sc3ccccc3C(C)C)C(=O)O2)O</chem>                                                             | 262    | nM |
| CHEMBL342585  | <chem>CC(C)(C)NC(=O)[C@@H]1CCCN1C(=O)[C@H](O)[C@@H]2Cc3ccc(OCCCOc4ccc5ccccc5cc4C(=O)N[C@@H](CC(=O)N)C(=O)N2)cc3</chem> | 268.7  | nM |
| CHEMBL126166  | <chem>OC(=O)CCCC1(CC(=O)C(=C(O)O1)SCC2ccccc2)c3ccccc3</chem>                                                           | 270    | nM |
| CHEMBL123561  | <chem>CCCCC1(CC(=O)C(=C(O)O1)SCc2ccccc2)c3ccccc3</chem>                                                                | 270    | nM |
| CHEMBL2092978 | <chem>CCC[C@]1(CCc2ccccc2)CC(=O)C(=C(O)O1)[C@@H](CC)c3cccc(NS(=O)(=O)c4cn(C)cn4)c3</chem>                              | 274.59 | nM |
| CHEMBL324788  | <chem>CC1=C(CCC(=O)O)c2cc3[nH]c(cc4[nH]c(cc5nc(cc1n2)c(C)c5CCOC(=O)C6=CC6)C(=C4CCOC(=O)C7=CC7)C)c(C)c3CCC(=O)O</chem>  | 275    | nM |
| CHEMBL292691  | <chem>COCOc1cccc1C[C@@H](O)C[C@@H](Cc2ccccc2)C(=O)N[C@@H]3[C@H](O)Cc4ccccc34</chem>                                    | 276    | nM |
| CHEMBL301401  | <chem>CC(C)(C)OC(=O)N[C@@H](Cc1cccc1)[C@H](O)CNC[C@@H](O)[C@H](Cc2ccc(OCCc3oc4ccccc4n3)cc2)NC(=O)OC(C)(C)C</chem>      | 280    | nM |
| CHEMBL174342  | <chem>OC1=C(C(CC2CC2)SC3CCCC3)C(=O)C=C(O1)c4ccccc4</chem>                                                              | 282.01 | nM |
| CHEMBL163435  | <chem>CC(C)c1cccc1SC2=C(O)OC(CCCC(=O)N3CCSCC3)(CC2=O)c4ccccc4</chem>                                                   | 285    | nM |
| CHEMBL338010  | <chem>CCCC1(CC(=O)C(=C(O)O1)SCc2ccccc2)c3ccccc3</chem>                                                                 | 290    | nM |
| CHEMBL417238  | <chem>OC1=C(Sc2cccs2)C(=O)CC(CCc3ccccc3)(O1)c4ccccc4</chem>                                                            | 290    | nM |
| CHEMBL59022   | <chem>NS(=O)(=O)c1cccc1C[C@@H](O)C[C@@H](Cc2ccccc2)C(=O)N[C@@H]3[C@H](O)Cc4ccccc34</chem>                              | 290    | nM |
| CHEMBL12573   | <chem>CC(C)c1cccc1SC2=C(O)C=C(OC2=O)c3ccc(O)c(c3)C(=O)O</chem>                                                         | 292    | nM |
| CHEMBL308574  | <chem>CC(C)(C)NC(=O)[C@@H]1CN(Cc2ccncc2)CCN1C[C@@H](O)[C@H](Cc3ccccc3)NC(=O)O[C@H]4CCOC4</chem>                        | 293    | nM |
| CHEMBL309507  | <chem>CC(C)(C)OC(=O)NC(CC(=O)N)C(=O)N[C@@H](Cc1cccc1)C(O)CN[C@@H](Cc2ccccc2)C(=O)NC3[C@H](O)Cc4ccccc34</chem>          | 295    | nM |
| CHEMBL45838   | <chem>CC(C)(C)OC(=O)N[C@@H](Cc1cccc1)[C@H](O)CNC[C@@H](O)[C@H](Cc2ccccc2)NC(=O)C(O)C(F)(F)F</chem>                     | 296.65 | nM |
| CHEMBL107758  | <chem>COC(=O)N[C@@H](C(C)C)C(=O)N[C@@H](Cc1cccc1)[C@H](O)CN(Cc2CCCC2)NC(=O)[C@@H](NC(=O)OC)C(C)C</chem>                | 298.4  | nM |

|               |                                                                                                                                        |        |    |
|---------------|----------------------------------------------------------------------------------------------------------------------------------------|--------|----|
| CHEMBL291802  | CC(C)(C)OC(=O)N[C@@H](Cc1ccccc1)[C@H](O)CNC[C@@H](O)[C@H](Cc2ccc(OCc3ccccc3)cc2)NC(=O)OC(C)(C)C                                        | 300    | nM |
| CHEMBL125720  | CC(C)(C)NC(=O)[C@@H]1C[C@@H]2CCCC[C@@H]2CN1C[C@H](O)CNC(=O)[C@@H]3N[C@H](SC3(C)C)C(NC(=O)Cc4ccccc4)C(=O)NCC5CCCCC5                     | 300    | nM |
| CHEMBL59816   | CC(C)(C)OC(=O)N[C@@H](Cc1ccccc1)[C@H](O)CNC[C@@H](O)[C@H](Cc2ccccc2)NC(=O)OC(C)(C)C                                                    | 300    | nM |
| CHEMBL170802  | CC(C)(C)CC(SC1CCCCC1)C2=C(O)C=C(OC2=O)c3ccccc3                                                                                         | 300    | nM |
| CHEMBL431043  | CC1(C)S[C@@H](N[C@H]1C(=O)N[C@H](Cc2ccccc2)[C@H](O)CC(=O)NCCc3ncc[nH]3)[C@H](NC(=O)Cc4ccccc4)C(=O)NCCc5ccccc5                          | 300    | nM |
| CHEMBL299475  | CS(=O)(=O)c1ccccc1C[C@@H](O)C[C@@H](Cc2ccccc2)C(=O)N[C@@H]3[C@H](O)Cc4ccccc34                                                          | 314    | nM |
| CHEMBL49773   | CC(C)(C)OC(=O)N[C@@H](Cc1ccccc1)[C@H](O)CNC[C@@H](O)[C@H](Cc2ccccc2)NC(=O)[C@H](O)c3ccccc3                                             | 320    | nM |
| CHEMBL413271  | CC(C)(C)OC(=O)N[C@@H](Cc1ccccc1)[C@H](O)CNC[C@@H](O)[C@H](Cc2ccc(OCc3oc4ccccc4n3)cc2)NC(=O)OC(C)(C)C                                   | 320    | nM |
| CHEMBL11142   | CCCC(=O)N[C@@H](CC(=O)OCc1ccccc1)C(=O)N[C@@H](Cc2ccccc2)[C@H](O)Cc3ccccc3C(=O)NC(C)(C)C                                                | 323    | nM |
| CHEMBL98533   | CCNC(=O)N(CC(C)C)C[C@@H](O)[C@H](Cc1ccccc1)NC(=O)[C@H](CC(=O)N)NC(=O)OCc2ccccc2                                                        | 330    | nM |
| CHEMBL120342  | OC(C(COCc1c(F)cccc1F)OCc2ccc(F)cc2)C(O)C(COCc3c(F)cccc3F)OCc4ccc(F)cc4                                                                 | 330    | nM |
| CHEMBL125597  | NC(=O)CCCCC1(CC(=O)C(=C(O)O1)SCC2c2ccccc2)c3ccccc3                                                                                     | 338    | nM |
| CHEMBL40760   | CC[C@H](C)[C@H](NC(=O)[C@@H](CC(O)C[C@@H](Cc1ccccc1)C(=O)N[C@@H]([C@@H](C)CC)C(=O)NCc2nc3ccccc3[nH]2)Cc4ccccc4)C(=O)NCc5nc6ccccc6[nH]5 | 346.41 | nM |
| CHEMBL326288  | CC(C)(C)NC(=O)[C@@H]1CCCN1C[C@@H](O)C[C@@H](Cc2ccccc2)C(=O)NC3[C@H](O)Cc4ccccc34                                                       | 347    | nM |
| CHEMBL327277  | CC(C)(C)NC(=O)[C@@H]1C[C@@H]2CCCC[C@@H]2CN1C[C@@H](O)[C@H](Cc3ccccc3)NC(=O)O[C@H]4CCCCO4                                               | 347.47 | nM |
| CHEMBL3138267 | CC(C)CCCC(C)[C@H]1CC[C@H]2[C@@H]3CCCC4CC(=C(c5cc(Cl)c(O)c(c5)C(=O)O)c6cc(Cl)c(O)c(c6)C(=O)O)CC[C@]4(C)[C@H]3CC[C@]12C                  | 350    | nM |
| CHEMBL156839  | OC(C[C@@H](Cc1ccccc1)C(=O)N[C@H]2CCCC[C@@H]2NC(=O)c3ccccc3)C[C@@H](Cc4ccccc4)C(=O)N[C@H]5CCCC[C@@H]5NC(=O)c6ccccc6                     | 350    | nM |
| CHEMBL94335   | CC(C)[C@@H](NC(=O)Cc1ccccc1)C(=O)NN(C[C@H](O)[C@H](Cc2ccccc2)NC(=O)[C@@H](NC(=O)Cc3ccccc3)C(C)C)Cc4ccccc4                              | 360    | nM |
| CHEMBL429193  | C[C@@H]1C[C@@H](CS1(=O)=O)OC(=O)N[C@@H](Cc2ccccc2)[C@H](O)CN3C[C@H]4CCCC[C@H]4C[C@H]3C(=O)NC(C)(C)C                                    | 362.22 | nM |
| CHEMBL62158   | OC1=C(Sc2cc3ccccc3s2)C(=O)CC(CCc4ccccc4)(O1)c5ccccc5                                                                                   | 363    | nM |
| CHEMBL141281  | OC(=O)c1cc(cc(Cl)c1O)C(=CCC23CC4CC(CC(C4)C2)C3)c5cc(Cl)c(O)c(c5)C(=O)O                                                                 | 370    | nM |
| CHEMBL308771  | CC(C)(C)NC(=O)[C@@H]1CN(CCN1C[C@@H](O)[C@H](Cc2ccccc2)NC(=O)O[C@H]3CCOC3)C(=O)c4ccccc4                                                 | 371    | nM |
| CHEMBL303444  | CC(C)(C)OC(=O)N[C@H](CC[C@H](O)[C@H](Cc1ccccc1)NC(=O)OC(C)(C)C)Cc2ccccc2                                                               | 380    | nM |
| CHEMBL154600  | CC(C)CCN(C[C@@H](O)[C@H](Cc1ccccc1)NC(=O)OCc2ccccc2)S(=O)(=O)c3ccccc3C1                                                                | 380    | nM |
| CHEMBL338554  | Cc1ccccc1SC2=C(O)OC(CC2=O)(c3ccccc3)c4ccccc4                                                                                           | 388    | nM |
| CHEMBL176742  | CC(C)(C)NC(=O)c1ccccc1SC[C@H](O)[C@H](Cc2ccccc2)NC(=O)[C@H](CC(=O)N)NC(=O)c3ccc4ccccc4c3                                               | 390    | nM |
| CHEMBL3138268 | CC(CCC=C(c1cc(Cl)c(O)c(c1)C(=O)O)c2cc(Cl)c(O)c(c2)C(=O)O)[C@H]3CC[C@H]4[C@@H]5CC[C@@H]6CC(F)(F)CC[C@]6(C)[C@H]5CC[C@]34C               | 390    | nM |
| CHEMBL320268  | CCNC(=O)[C@@H](NC(=O)c1ccccc1)[C@@H]2N[C@@H](C(=O)N)CCNC(=O)[C@@H]3N[C@H](SC3(C)C)[C@H](NC(=O)c4ccccc4)C(                              | 390    | nM |



|              |                                                                                                                                      |        |    |
|--------------|--------------------------------------------------------------------------------------------------------------------------------------|--------|----|
|              | =O)NCC)C(C)(C)S2                                                                                                                     |        |    |
| CHEMBL170981 | CC(C)CCC(Sc1ccccc1)C2=C(O)C=C(OC2=O)c3ccccc3                                                                                         | 390    | nM |
| CHEMBL319872 | CC1(C)S[C@@H](N[C@H]1C(=O)N[C@H](Cc2ccccc2)[C@@H](O)C(=O)N)[C@H](NC(=O)Cc3ccccc3)C(=O)NCc4ccccc4                                     | 394.72 | nM |
| CHEMBL153845 | OC(C[C@@H](Cc1ccccc1)C(=O)N[C@H]2CCCC[C@@H]2NC(=O)c3ccccc3)C[C@@H](Cc4ccccc4)C(=O)N[C@H]5CCCC[C@@H]5NC(=O)c6ccccc6                   | 400    | nM |
| CHEMBL12413  | CC(C)(C)NC(=O)[C@@H]1C[C@@H](CCN1C[C@@H](O)[C@H](Cc2ccccc2)NC(=O)OCc3ccccc3)OCc4ccccc4                                               | 400    | nM |
| CHEMBL299054 | CC(C)(C)OC(=O)N[C@@H](Cc1ccccc1)[C@H](O)CNC[C@@H](O)[C@H](Cc2ccccc2)NC(=O)OC(C)(C)C                                                  | 400    | nM |
| CHEMBL20303  | CCCC[C@H](CC1(C[C@@H](CCCC)C(=O)N[C@@H](CC(C)C)C(=O)N[C@@H](Cc2ccccc2)C(=O)OC)CO1)C(=O)N[C@@H](CC(C)C)C(=O)N[C@@H](Cc3ccccc3)C(=O)OC | 400    | nM |
| CHEMBL300492 | CC(C)(C)NC(=O)N[C@@H](Cc1ccccc1)[C@H](O)CNC[C@@H](O)[C@H](Cc2ccccc2)NC(=O)OC(C)(C)C                                                  | 400    | nM |
| CHEMBL122565 | CCCCC1(CC(=O)C(=C(O)O1)SCCc2ccccc2)c3ccccc3                                                                                          | 400    | nM |
| CHEMBL170421 | CC(C)CC(Sc1ccccc1)C2=C(O)C=C(OC2=O)c3ccccc3                                                                                          | 410    | nM |
| CHEMBL369369 | CC(C)(C)NC(=O)c1ccccc1OC[C@H](O)[C@H](Cc2ccccc2)NC(=O)[C@H](CC(=O)N)NC(=O)c3cc(O)c4ccccc4n3                                          | 410    | nM |
| CHEMBL371457 | CC(C)C[C@@H](C[C@@H](O)[C@H](Cc1cccc(Br)c1)NC(=O)COc2c(C)cccc2)S(=O)(=O)c3ccc(F)cc3                                                  | 412.31 | nM |
| CHEMBL73723  | CC(C)(C)NC(=O)[C@@H]1CN(CCN1C[C@@H](O)[C@H](Cc2ccccc2)NC(=O)O[C@H]3CCOC3)C(=O)c4ccccc4                                               | 414    | nM |
| CHEMBL265333 | Cc1cccc(C)c1COC(=O)N[C@@H](Cc2ccccc2)[C@H](O)CN3CC[C@H](C[C@H]3C(=O)NC(C)(C)OCc4ccccc4                                               | 420    | nM |
| CHEMBL115376 | CC[C@H](C)[C@H](NC(=O)[C@@H]1CCCN1CC(O)[C@H](Cc2ccccc2)NC(=O)[C@H](CC(=O)N)NC(=O)[C@H](CC(C)C)NC(=O)[C@H](CO)NC(=O)C)C(=O)OC         | 420    | nM |
| CHEMBL344953 | COCC(C)(C)OC(=O)N[C@@H](Cc1ccccc1)[C@H](O)CNC[C@@H](O)[C@H](Cc2ccccc2)NC(=O)OC(C)(C)C                                                | 420    | nM |
| CHEMBL368994 | CC(C)(C)NC(=O)c1ccccc1OC[C@H](O)[C@H](Cc2ccccc2)NC(=O)[C@H](CC(=O)N)NS(=O)(=O)c3ccc4ccccc4c3                                         | 425    | nM |
| CHEMBL159387 | CC(C)c1ccccc1SC2=C(O)OC(CCCC(=O)Nc3ccccc3)(CC2=O)c4ccccc4                                                                            | 429    | nM |
| CHEMBL317881 | CC(C)CNC(=O)C[C@H](O)[C@@H](Cc1ccccc1)NC(=O)[C@@H]2N[C@H](SC2(C)C)[C@H](NC(=O)Cc3ccccc3)C(=O)NCc4ccccc4                              | 439.55 | nM |
| CHEMBL122292 | CC(C)CC1(CC(=O)C(=C(O)O1)SCc2ccccc2)c3ccccc3                                                                                         | 440    | nM |
| CHEMBL46020  | CC(C)(C)OC(=O)N[C@@H](Cc1ccccc1)[C@H](O)CNC[C@@H](O)[C@H](Cc2ccccc2)NC(=O)C(C)(C)O                                                   | 450    | nM |
| CHEMBL302486 | CC(C)(C)NC(=O)[C@@H]1CCCN1C[C@@H](O)[C@@H]2Cc3ccc(OCCO)c4cc5ccccc5cc4C(=O)N[C@@H](CC(=O)N)C(=O)N2)cc3                                | 450    | nM |
| CHEMBL287984 | CC[C@H](C)[C@H](NC(=O)[C@@H](CC(O)C[C@@H](Cc1ccccc1)C(=O)N[C@@H]([C@@H](C)CC)C(=O)NCc2ccccc2)Cc3ccccc3)C(=O)NCc4ccccc4               | 450    | nM |
| CHEMBL331645 | CC(C)(C)NC(=O)[C@@H]1CSCN1CC(O)CNC(=O)[C@@H]2N[C@H](SC2(C)C)C(NC(=O)Cc3ccccc3)C(=O)NCc4ccccc4                                        | 450    | nM |
| CHEMBL428686 | CC(C)CCNC(=O)[C@@H](C[C@H](O)[C@H](Cc1ccccc1)NC(=O)OC(C)(C)C)Cc2ccccc2                                                               | 470    | nM |
| CHEMBL355133 | CC(C)(C)NC(=O)[C@@H]1C[C@@H]2CCCC[C@@H]2CN1C[C@@H](O)[C@H](Cc3ccccc3)NC(=O)[C@H]4CCSC4                                               | 471.49 | nM |
| CHEMBL306598 | CC(C)(C)NC(=O)[C@@H]1CN(CCN1C[C@H](O)[C@H](Cc2ccccc2)NC(=O)O[C@H]3CCOC3)C(=O)OCc4ccccc4                                              | 476.24 | nM |
| CHEMBL73662  | CC(C)(C)NC(=O)[C@@H]1CN(CCc2ccccc2)CCN1C[C@@H](O)[C@H](Cc3ccccc3)NC(=O)O[C@H]4CCOC4                                                  | 478    | nM |
| CHEMBL366779 | OC1=C(C(SC2CCCC2)c3ccccc3)C(=O)C=C(O1)c4ccccc4                                                                                       | 480    | nM |
| CHEMBL171802 | OC1=C(C(SCc2ccccc2)c3ccccc3)C(=O)C=C(O1)c4ccccc4                                                                                     | 480    | nM |

|               |                                                                                                                                                 |        |    |
|---------------|-------------------------------------------------------------------------------------------------------------------------------------------------|--------|----|
| CHEMBL75270   | <chem>CC(C)(C)NC(=O)[C@@H]1CN(Cc2cccc(O)c2)CCN1C[C@@H](O)[C@H](Cc3cccc3)NC(=O)O[C@H]4CCOC4</chem>                                               | 482    | nM |
| CHEMBL277060  | <chem>OC1=C(SCc2cccc2)C(=O)C=C(O1)c3ccc4OCOc4c3</chem>                                                                                          | 490    | nM |
| CHEMBL94271   | <chem>CC(C)[C@@H](NC(=O)Cc1ccnc1)C(=O)NN(C[C@H](O)[C@H](Cc2cccc2)NC(=O)[C@@H](NC(=O)Cc3ccnc3)C(C)C)Cc4cccc4</chem>                              | 500    | nM |
| CHEMBL48891   | <chem>CC(C)(C)OC(=O)N[C@@H](Cc1cccc1)[C@H](O)CNC[C@@H](O)C(CCc2cccc2)NC(=O)OC(C)(C)C</chem>                                                     | 500    | nM |
| CHEMBL163563  | <chem>Cc1cc(cc1)C(=O)N2CCc3cccc3C2)C(=O)N[C@@H](Cc4cccc4)[C@H](O)Cc5cccc5C(=O)NC(C)(C)C</chem>                                                  | 500    | nM |
| CHEMBL291354  | <chem>CC(C)(C)n1c(SC2=C(O)OC(CCc3cccc3)(CC2=O)c4cccc4)nc5cccc15</chem>                                                                          | 505    | nM |
| CHEMBL333568  | <chem>OC1=C(SCC2cccc2)C(=O)CC(CC3CCCC3)(O1)c4cccc4</chem>                                                                                       | 510    | nM |
| CHEMBL99934   | <chem>CCCNC(=O)N(CC(C)C)C[C@@H](O)[C@H](Cc1cccc1)NC(=O)[C@H](CC(=O)N)NC(=O)OCc2cccc2</chem>                                                     | 518    | nM |
| CHEMBL313250  | <chem>COc1cccc1CCCC2=C(O)Oc3cc(O)ccc3C2=O</chem>                                                                                                | 520    | nM |
| CHEMBL382924  | <chem>CNe1cc(cc1)S(=O)(=O)[C@@H](CC(C)C)C[C@@H](O)[C@H](Cc2cccc(Br)c2)NC(=O)COc3c(C)cccc3C</chem>                                               | 530    | nM |
| CHEMBL436266  | <chem>CC1(C)S[C@@H](N[C@H]1C(=O)NCCCCNC(=O)[C@@H]2N[C@H](SC2(C)C)[C@H](NC(=O)Cc3cccc3)C(=O)NCc4cccc4)[C@H](NC(=O)Cc5cccc5)C(=O)NCc6cccc6</chem> | 530    | nM |
| CHEMBL318844  | <chem>CC1(C)S[C@@H](N[C@H]1C(=O)NCCCCNC(=O)[C@@H]2N[C@H](SC2(C)C)[C@H](NC(=O)Cc3cccc3)C(=O)NCc4cccc4)[C@H](NC(=O)Cc5cccc5)C(=O)NCc6cccc6</chem> | 540    | nM |
| CHEMBL319126  | <chem>CC(C)(C)OC(=O)N[C@@H](Cc1cccc1)[C@@H](O)C[C@@H](Cc2cccc2)C(=O)NCC(=O)N</chem>                                                             | 550    | nM |
| CHEMBL422197  | <chem>CC(C)c1cccc1SC2=C(O)OC(CCCC(=O)N3CCNCC3)(CC2=O)c4cccc4</chem>                                                                             | 564    | nM |
| CHEMBL163539  | <chem>CC(C)c1cccc1SC2=C(O)OC(CCCCC(=O)N3CCSCC3)(CC2=O)c4cccc4</chem>                                                                            | 583    | nM |
| CHEMBL3351009 | <chem>CC(C)[C@H](N)C(=O)N[C@@H](Cc1cccc1)C(O)[C@H](Cc2cccc2)NC(=O)[C@@H](N)C(C)C</chem>                                                         | 590    | nM |
| CHEMBL278499  | <chem>OC1=C(SCc2cccc2)C(=O)C=C(O1)c3cccc(c3)C(F)(F)F</chem>                                                                                     | 600    | nM |
| CHEMBL345630  | <chem>OC(C[C@@H](Cc1cccc1)C(=O)N[C@H]2CCCC[C@@H]2NC(=O)c3ccnc3)C[C@@H](Cc4cccc4)C(=O)N[C@H]5CCCC[C@@H]5NC(=O)c6ccnc6</chem>                     | 600    | nM |
| CHEMBL95316   | <chem>CC(C)(C)OC(=O)N[C@@H](Cc1cccc1)[C@@H](O)C[C@@H](Cc2cccc2)C(=O)N[C@@H](CO)C(=O)N</chem>                                                    | 606    | nM |
| CHEMBL15217   | <chem>CC(C)COC(=O)c1cccc1CSC2=C(O)C=C(OC2=O)c3cccc3</chem>                                                                                      | 619    | nM |
| CHEMBL354917  | <chem>CC(C)c1cccc1SC2=C(O)OC(CCCC(=O)N(C)c3cccc3)(CC2=O)c4cccc4</chem>                                                                          | 624    | nM |
| CHEMBL274046  | <chem>OC1=C(SCc2cccc2)C(=O)C=C(O1)c3cc(cc3)C(F)(F)F)C(F)(F)F</chem>                                                                             | 630    | nM |
| CHEMBL124123  | <chem>CC(C)(C)NC(=O)[C@@H]1C[C@@H](CN1CC(O)CNC(=O)[C@@H]2N[C@H](SC2(C)C)C(NC(=O)Cc3cccc3)C(=O)NCc4cccc4)OCc5cccc5</chem>                        | 650    | nM |
| CHEMBL163616  | <chem>Cc1ccc(cc1)C(=O)N2CCc3cccc3C2)C(=O)N[C@@H](Cc4cccc4)[C@H](O)Cc5cccc5C(=O)NC(C)(C)C</chem>                                                 | 670    | nM |
| CHEMBL91025   | <chem>OC1=C(CCCOc2cccc(c2)C#N)C(=O)Oc3cccc13</chem>                                                                                             | 670    | nM |
| CHEMBL159290  | <chem>CC(C)c1cccc1SC2=C(O)OC(CCCC(=O)N(C)c3cccc3)(CC2=O)c4cccc4</chem>                                                                          | 676    | nM |
| CHEMBL420379  | <chem>CC(C)(C)NC(=O)[C@@H]1CN(Cc2ccnc2)CCN1C[C@@H](O)[C@H](Cc3cccc3)NC(=O)O[C@H]4CCOC4</chem>                                                   | 676    | nM |
| CHEMBL370663  | <chem>O[C@H](C[C@H](CCc1ccc(Cl)cc1)S(=O)(=O)c2ccc(F)cc2)[C@H](Cc3cccc(Br)c3)NC(=O)[C@H]4CCCO4</chem>                                            | 689.93 | nM |
| CHEMBL14692   | <chem>OC1=C(SCc2cccc2)C(=O)C=C(O1)c3ccc(O)cc3</chem>                                                                                            | 690    | nM |
| CHEMBL14759   | <chem>OC1=C(SCc2cccc2)C(=O)C=C(O1)c3cccc(Cl)c3</chem>                                                                                           | 690    | nM |
| CHEMBL354897  | <chem>NC(=O)OC[C@@H]1CCCOC1</chem>                                                                                                              | 694    | nM |

|              |                                                                                                                                                             |       |    |
|--------------|-------------------------------------------------------------------------------------------------------------------------------------------------------------|-------|----|
| CHEMBL51366  | <chem>CC(C)(C)OC(=O)N[C@@H](Cc1ccccc1)[C@H](O)CNC[C@@H](O)[C@H](Cc2ccccc2)NC(=O)SC(C)(C)C</chem>                                                            | 700   | nM |
| CHEMBL408667 | <chem>CC1=C(C(COC(=O)C2=CCC2)OC(=O)C3=CCC3)c4cc5[nH]c(cc6[nH]c(cc7nc(cc1n4)c(C)c7CCC(=O)O)c(CCC(=O)O)c6C)C(=C5C)C(COC(=O)C8=CCC8)OC(=O)C9=CCC9</chem>       | 700   | nM |
| CHEMBL333259 | <chem>CCNC(=O)C(NC(=O)Cc1ccccc1)[C@@H]2N[C@@H](C(=O)NCC(O)CN(C)[C@@H](CC3CCCC3)C(=O)NC(C)(C)C(C)(C)S2</chem>                                                | 710   | nM |
| CHEMBL14298  | <chem>COc1ccc(cc1C)C2=CC(=C(SCc3ccccc3)C(=O)O2)O</chem>                                                                                                     | 740   | nM |
| CHEMBL94316  | <chem>CC(C)(C)OC(=O)N[C@@H](Cc1ccccc1)[C@H](O)C[C@@H](Cc2ccccc2)C(=O)N[C@@H](Cc3ncc[nH]3)C(=O)N</chem>                                                      | 770   | nM |
| CHEMBL49305  | <chem>CC(C)(C)OC(=O)N[C@@H](Cc1ccccc1)[C@H](O)CNC[C@@H](O)[C@H](Cc2ccccc2)NC(=O)C(O)(CO)C(C)(C)C</chem>                                                     | 774.6 | nM |
| CHEMBL326831 | <chem>CC1=C(C(COC(=O)C2=CC2)OC(=O)C3=CC3)c4cc5[nH]c(cc6[nH]c(cc7nc(cc1n4)c(C)c7CCC(=O)O)c(CCC(=O)O)c6C)C(=C5C)C(COC(=O)C8=CC8)OC(=O)C9=CC9</chem>           | 774.6 | nM |
| CHEMBL173361 | <chem>OC1=C(C(Sc2ccccc2)c3ccccc3)C(=O)C=C(O1)c4ccccc4</chem>                                                                                                | 780   | nM |
| CHEMBL421475 | <chem>OC1=C(SCC2ccccc2)C(=O)CC(O1)(c3ccccc3)c4ccncc4</chem>                                                                                                 | 790   | nM |
| CHEMBL383583 | <chem>CC(C)C[C@@H](C[C@@H](O)[C@H](Cc1cccc(Br)c1)NC(=O)COc2c(C)cccc2C)S(=O)(=O)c3ccc(cc3)N(C)C</chem>                                                       | 790   | nM |
| CHEMBL14578  | <chem>OC1=C(SCc2ccccc2)C(=O)C=C(O1)c3ccc4OCCOc4c3</chem>                                                                                                    | 790   | nM |
| CHEMBL334149 | <chem>Cc1ccccc1COC(COCc2ccccc2F)C(O)C(O)C(COCc3ccccc3F)OCc4cccc4C</chem>                                                                                    | 800   | nM |
| CHEMBL48302  | <chem>CC(C)(C)OC(=O)NC(CC1CCCCC1)[C@H](O)CNC[C@@H](O)C(CC2CCCC2)NC(=O)OC(C)(C)C</chem>                                                                      | 800   | nM |
| CHEMBL447834 | <chem>CCNC(=O)[C@@H](NC(=O)Cc1ccc2ccccc2c1)[C@@H]3N[C@@H](C(=O)NCCNC(=O)[C@@H]4N[C@H](SC4(C)C)[C@H](NC(=O)Cc5ccc6ccccc6c5)C(=O)NCC)C(C)(C)S3</chem>         | 820   | nM |
| CHEMBL316755 | <chem>CN(Cc1ccccc1)C(=O)[C@@H](NC(=O)Cc2ccccc2)[C@@H]3N[C@@H](C(=O)NCCNC(=O)[C@@H]4N[C@H](SC4(C)C)[C@H](NC(=O)Cc5ccccc5)C(=O)N(C)Cc6ccccc6)C(C)(C)S3</chem> | 820   | nM |
| CHEMBL325546 | <chem>CC1(C)S[C@@H](N[C@H]1C(=O)NCCNC(=O)[C@@H]2N[C@H](SC2(C)C)[C@H](NC(=O)Cc3ccccc3)C(=O)N(CCO)CCO)[C@H](NC(=O)Cc4ccccc4)C(=O)N(CCO)CCO</chem>             | 840   | nM |
| CHEMBL173704 | <chem>CC(C)CC(SCC1CCCCC1)C2=C(O)C=C(OC2=O)c3ccccc3</chem>                                                                                                   | 848   | nM |
| CHEMBL41063  | <chem>CC[C@H](C)[C@H](NC(=O)[C@@H](CC(O)C[C@@H](Cc1ccccc1)C(=O)N[C@@H]([C@@H](C)CC)C(=O)NCCN2CCOCC2)Cc3ccccc3)C(=O)NCCN4CCOCC4</chem>                       | 850   | nM |
| CHEMBL14792  | <chem>Cc1cccc(c1)C2=CC(=C(SCc3ccccc3)C(=O)O2)O</chem>                                                                                                       | 860   | nM |
| CHEMBL318387 | <chem>CC(C)[C@H](NC(=O)c1sc(C)nc1C)C(=O)N[C@@H](Cc2ccccc2)[C@@H](O)[C@H](O)[C@H](Cc3ccccc3)NC(=O)[C@@H](NC(=O)c4sc(C)nc4C)C(C)C</chem>                      | 860   | nM |
| CHEMBL290872 | <chem>CC[C@H](C)[C@H](NC(=O)[C@@H](CC(O)CN1C[C@H]2CCCC[C@H]2C[C@H]1C(=O)NC(C)(C)Cc3ccccc3)C(=O)OC</chem>                                                    | 870   | nM |
| CHEMBL46067  | <chem>CC(C)(C)OC(=O)N[C@@H](Cc1ccccc1)[C@H](O)CNC[C@@H](O)[C@H](Cc2ccccc2)NC(=O)C3(O)COCC3(C)C</chem>                                                       | 877.5 | nM |
| CHEMBL139346 | <chem>COc1ccc(cc1)S(=O)(=O)N(CC(C)C)C[C@@H](O)[C@H](Cc2ccccc2)NC(=O)c3ccccc3O</chem>                                                                        | 900   | nM |
| CHEMBL304369 | <chem>CC(C)(C)NC(=O)[C@@H]1CCCN1C[C@@H](O)[C@@H]2Cc3ccc(OCCCCO)c4cc5ccccc5cc4C(=O)N[C@@H](CC(=O)N)C(=O)N2)cc3</chem>                                        | 900   | nM |
| CHEMBL48175  | <chem>CC(C)OC(=O)N[C@@H](Cc1ccccc1)[C@H](O)CNC[C@@H](O)[C@H](Cc2ccccc2)NC(=O)OC(C)C</chem>                                                                  | 900   | nM |
| CHEMBL11424  | <chem>CC(C)(C)NC(=O)c1ccccc1C[C@@H](O)[C@H](Cc2ccccc2)NC(=O)[C@H](CSc3ccccc3)NS(=O)(=O)C</chem>                                                             | 910   | nM |
| CHEMBL99015  | <chem>CCCCNC(=O)N(CC(C)C)C[C@@H](O)[C@H](Cc1ccccc1)NC(=O)[C@H](CC(=O)N)NC(=O)OCc2ccccc2</chem>                                                              | 940   | nM |
| CHEMBL275161 | <chem>COP(=O)(CNC(=O)[C@@H](NC(=O)[C@H](Cc1cccc2ccccc12)CS(=</chem>                                                                                         | 950   | nM |

|              |                                                                                                                         |         |    |
|--------------|-------------------------------------------------------------------------------------------------------------------------|---------|----|
|              | O)(=O)C(C)(C)C(C)C(C)CNC(=O)[C@@H](NC(=O)[C@H](Cc3cccc4cccc34)CS(=O)(=O)C(C)(C)C)C(C)C                                  |         |    |
| CHEMBL73804  | CC(C)(C)NC(=O)[C@@H]1CN(Cc2ccccn2)CCN1C[C@@H](O)[C@H](Cc3cccc3)NC(=O)O[C@H]4CCOC4                                       | 957     | nM |
| CHEMBL14828  | COc1cccc(c1)C2=CC(=C(SCc3cccc3)C(=O)O2)O                                                                                | 990     | nM |
| CHEMBL14934  | COC(=O)c1cccc1CSC2=C(O)C=C(OC2=O)c3cccc3                                                                                | 1000    | nM |
| CHEMBL122233 | CCNC(=O)C(NC(=O)Cc1cccc1)[C@@H]2N[C@@H](C(=O)NCC(O)CN[C@@H](CC3CCCC3)C(=O)NC(C)(C)C)C(C)(C)S2                           | 1000    | nM |
| CHEMBL17704  | CC(C)(C)NC(=O)[C@@H]1C[C@@H]2CCCC[C@@H]2CN1C[C@@H](O)[C@H](Cc3cccc3)NC(=O)OCCS(=O)(=O)C                                 | 1030    | nM |
| CHEMBL432178 | OCc1ccc(CN2C(Cc3cccc3)P(=O)(O)C(Cc4cccc4)N(Cc5ccc(CO)cc5)C2=O)cc1                                                       | 1073.31 | nM |
| CHEMBL421410 | CC1(C)S[C@@H](N[C@H]1C(=O)N[C@H](Cc2cccc2)[C@H](O)CC(=O)NCCO)[C@H](NC(=O)Cc3cccc3)C(=O)NCc4cccc4                        | 1100    | nM |
| CHEMBL309402 | NC(CC(=O)N)C(=O)N[C@@H](Cc1cccc1)[C@H](O)CN[C@@H](Cc2cccc2)C(=O)NC3[C@H](O)Cc4cccc34                                    | 1100    | nM |
| CHEMBL12705  | CC(C)(C)NC(=O)[C@@H]1C[C@@H](CCN1C[C@@H](O)[C@H](Cc2cccc2)NC(=O)COc3cccc3)OCc4cccc4                                     | 1100    | nM |
| CHEMBL348226 | CC(C)(C)OC(=O)N[C@@H](Cc1cccc1)[C@H](O)CNC[C@@H](O)[C@H](Cc2cccc2)NC(=O)OC(C)(C)CCCO                                    | 1100    | nM |
| CHEMBL439833 | CC(C)c1cccc1SC2=C(O)OC(CCC(=O)N3CCSCC3)(CC2=O)c4cccc4                                                                   | 1103    | nM |
| CHEMBL161954 | CC(C)c1cccc1SC2=C(O)OC(CCC(=O)N3CCNCC3)(CC2=O)c4cccc4                                                                   | 1106    | nM |
| CHEMBL52153  | CC(C)(C)OC(=O)N[C@@H](Cc1cccc1)[C@H](O)CNC[C@@H](O)[C@@H](Cc2cccc2)NC(=O)OC(C)(C)C                                      | 1118.03 | nM |
| CHEMBL15182  | OC1=C(SCc2cccc2)C(=O)C=C(O1)c3cccc(O)c3                                                                                 | 1190    | nM |
| CHEMBL339998 | OC(=O)CCC1(CC(=O)C(=C(O)O1)SCC2cccc2)c3cccc3                                                                            | 1200    | nM |
| CHEMBL121976 | CC(C)CC1(CC(=O)C(=C(O)O1)SCC2cccc2)c3cccc3                                                                              | 1200    | nM |
| CHEMBL37465  | CC[C@H](C)[C@H](NC(=O)[C@@H](CC(O)C[C@@H](Cc1cccc1)C(=O)N[C@@H](C)CC)C(=O)NCC2CCc3cccc3N2)Cc4cccc4)C(=O)NCC5CCc6cccc6N5 | 1200    | nM |
| CHEMBL58998  | O[C@@H](C[C@@H](Cc1cccc1)C(=O)N[C@@H]2[C@H](O)Cc3cccc23)Cc4cccc4                                                        | 1200    | nM |
| CHEMBL340206 | OCCCC1(CC(=O)C(=C(O)O1)SCc2cccc2)c3cccc3                                                                                | 1260    | nM |
| CHEMBL353796 | CC(C)c1cccc1SC2=C(O)OC(CCC(=O)N3CCN(CC3)C(=O)OC(C)(C)C)(CC2=O)c4cccc4                                                   | 1270    | nM |
| CHEMBL325673 | CC(C)[C@@H](NS(=O)(=O)N(C)Cc1cccc1)C(=O)N[C@@H](Cc2cccc2)C(O)[C@H](Cc3cccc3)NC(=O)[C@@H](NS(=O)(=O)N(C)Cc4cccc4)C(C)C   | 1300    | nM |
| CHEMBL122797 | OC1=C(SCC2cccc2)C(=O)CC3(CCCc4cccc34)O1                                                                                 | 1300    | nM |
| CHEMBL121837 | NC(=O)CCCC1(CC(=O)C(=C(O)O1)SCC2cccc2)c3cccc3                                                                           | 1300    | nM |
| CHEMBL104471 | CC(CCC=C(C)C)C1=C(O)C(CCC2cccc2)(OC1=O)C(=O)NC(C)(C)C                                                                   | 1300    | nM |
| CHEMBL48993  | CC(C)(C)OC(=O)N[C@@H](Cc1cccc1)[C@H](O)CNC[C@@H](O)[C@H](Cc2cccc2)NC(=O)[C@](C)(O)c3cccc3                               | 1300    | nM |
| CHEMBL331664 | OC(C(COCc1ccc(F)cc1)OCc2cccc2)C(O)C(COCc3ccc(F)cc3)OCc4cccc4                                                            | 1322.88 | nM |
| CHEMBL12484  | CC(C)c1cccc1SC2=C(O)C=C(OC2=O)c3cccc3C                                                                                  | 1345    | nM |
| CHEMBL99211  | CC(C)CN(C[C@@H](O)[C@H](Cc1cccc1)NC(=O)[C@H](CC(=O)N)NC(=O)OCc2cccc2)C(=O)NC(C)(C)C                                     | 1374.77 | nM |
| CHEMBL328732 | CCOC(=O)c1cccc(OCCCC2=C(O)Oc3cccc3C2=O)c1                                                                               | 1400    | nM |
| CHEMBL327912 | OC1=C(CCCOc2cccc(Cl)c2)C(=O)Oc3cccc13                                                                                   | 1400    | nM |
| CHEMBL274291 | CC(C)(C)NC(=O)[C@@H]1C[C@@H](CCN1C[C@@H](O)[C@H](Cc2cccc2)NC(=O)CCc3cccc3)OCc4cccc4                                     | 1400    | nM |
| CHEMBL435401 | CC(C)CCC1(CC(=O)C(=C(O)O1)Sc2cccc2)c3cccc3                                                                              | 1400    | nM |
| CHEMBL12797  | COc1cccc1C2=CC(=C(Sc3cccc3C(C)C)C(=O)O2)O                                                                               | 1418    | nM |
| CHEMBL119968 | OC(C(COCc1cccc1)OCc2c(F)cccc2F)C(O)C(COCc3cccc3)OCc4c(F)                                                                | 1453.27 | nM |

|               |                                                                                                                                       |         |    |
|---------------|---------------------------------------------------------------------------------------------------------------------------------------|---------|----|
|               | cccc4F                                                                                                                                |         |    |
| CHEMBL306640  | CC(C)(C)OC(=O)N[C@@H](Cc1ccccc1)C2(O)CCN(CC2)[C@@H](Cc3ccccc3)C(=O)N[C@@H]4[C@H](O)Cc5ccccc45                                         | 1460    | nM |
| CHEMBL121287  | OC(C(COCc1ccccc1F)OCc2ccccc2)C(O)C(COCc3ccccc3F)OCc4ccccc4                                                                            | 1489.97 | nM |
| CHEMBL69781   | CC(C)C(NC(=O)OCc1ccccc1)C(=O)N[C@@H](CC(C)[C@H](Cc2ccccc2)NC(=O)C(NC(=O)OCc3ccccc3)C(C)C)[N+](=O)[O-]Cc4ccccc4                        | 1500    | nM |
| CHEMBL99527   | CNC(=O)N(CC(C)C)C[C@@H](O)[C@H](Cc1ccccc1)NC(=O)[C@H](CC(=O)N)NC(=O)OCc2ccccc2                                                        | 1500    | nM |
| CHEMBL3138187 | CC(C)CCCC(C)[C@H]1CC[C@H]2[C@@H]3CCC4C[C@H](CCC=C(c5cc(Cl)c(O)c(c5)C(=O)O)c6cc(Cl)c(O)c(c6)C(=O)O)CC[C@]4(C)[C@H]3CC[C@]12C           | 1500    | nM |
| CHEMBL346860  | CC(C)(C)OC(=O)N[C@@H](Cc1ccccc1)[C@H](O)CNC[C@@H](O)[C@H](Cc2ccccc2)NC(=O)OC(C)(C)CNC=O                                               | 1500    | nM |
| CHEMBL3137943 | CC(CCC=C(c1cc(Cl)c(O)c(c1)C(=O)O)c2cc(Cl)c(O)c(c2)C(=O)O)[C@H]3CC[C@H]4[C@@H]5CC[C@@H]6CCCC[C@]6(C)[C@H]5CC[C@]34C                    | 1500    | nM |
| CHEMBL122261  | CC(C)(C)NC(=O)[C@@H]1C[C@H](CN1CC(O)CNC(=O)[C@@H]2N[C@H](SC2(C)C)C(NC(=O)Cc3ccccc3)C(=O)NCc4ccccc4)OC(C)(C)C                          | 1600    | nM |
| CHEMBL330840  | OC(C(COCc1ccc(F)cc1)OCc2ccc(F)cc2)C(O)C(COCc3ccc(F)cc3)OCc4ccc(F)cc4                                                                  | 1600    | nM |
| CHEMBL291732  | O[C@@H](C[C@@H](Cc1ccccc1)C(=O)N[C@@H]2[C@H](O)Cc3ccccc23)Cc4ccccc4O                                                                  | 1600    | nM |
| CHEMBL274011  | COc1ccc(cc1)C2=CC(=C(SCc3ccccc3)C(=O)O2)O                                                                                             | 1630    | nM |
| CHEMBL120214  | OC(C(COCc1ccccc1)OCc2cccc(F)c2)C(O)C(COCc3ccccc3)OCc4cccc(F)c4                                                                        | 1643.17 | nM |
| CHEMBL14930   | OC1=C(SCc2ccccc2)C(=O)C=C(O1)c3ccccc3                                                                                                 | 1700    | nM |
| CHEMBL89444   | COc1ccccc1CCCCC2=C(O)Oc3ccccc3C2=O                                                                                                    | 1700    | nM |
| CHEMBL68528   | CC(C)(C)OC(=O)N[C@@H](Cc1ccccc1)[C@]2(O)CCN(CC2)[C@@H](Cc3ccccc3)C(=O)N[C@@H]4[C@H](O)Cc5ccccc45                                      | 1897.37 | nM |
| CHEMBL18086   | CC(C)(C)NC(=O)[C@@H]1C[C@@H]2CCCC[C@@H]2CN1C[C@@H](O)[C@H](Cc3ccccc3)NC(=O)O[C@H]4CCCS(=O)(=O)C4                                      | 1899.65 | nM |
| CHEMBL48996   | CCCC[C@@H](CN[C@@H](CCCC)C(=O)N[C@@H](CCC(=O)N)C(=O)N[C@@H](CCNC(=N)N)C(=O)N)NC(=O)[C@@H](NC(=O)[C@@H](NC(=O)C)[C@@H](C)O)[C@@H](C)CC | 1900    | nM |
| CHEMBL280520  | OC(=O)c1ccc(CSC2=C(O)C=C(OC2=O)c3ccccc3)cc1                                                                                           | 1917.19 | nM |
| CHEMBL12622   | CCOC(=O)c1cccc(c1)C2=CC(=C(Sc3ccccc3C(C)C)C(=O)O2)O                                                                                   | 1934    | nM |
| CHEMBL38501   | CCCC[C@H](CC(O)(CO)C[C@@H](CCCC)C(=O)N[C@@H](CC(C)C)C(=O)N[C@@H](Cc1ccccc1)C(=O)OC)C(=O)N[C@@H](Cc2ccccc2)C(=O)OC                     | 2000    | nM |
| CHEMBL324640  | CC(C1=C(O)C(Cc2ccccc2)(OC1=O)C(=O)NC(C)(C)C)c3ccccc3                                                                                  | 2000    | nM |
| CHEMBL327985  | CC(C)[C@@H](NC(=O)N1CCOCC1)C(=O)NN(C[C@H](O)[C@H](Cc2ccccc2)NC(=O)[C@@H](NC(=O)N3CCOCC3)C(C)C)Cc4ccccc4                               | 2000    | nM |
| CHEMBL15246   | CCc1cccc(c1)C2=CC(=C(SCc3ccccc3)C(=O)O2)O                                                                                             | 2040    | nM |
| CHEMBL332603  | OC1=C(SCc2ccccc2)C(=O)CC(O1)c3ccccc3                                                                                                  | 2100    | nM |
| CHEMBL441952  | OC1=C(SCc2ccccc2)C(=O)C=C(O1)c3cccc(OC(F)(F)F)c3                                                                                      | 2140    | nM |
| CHEMBL122464  | CC(C)(C)NC(=O)[C@@H]1CCCN1CC(O)CNC(=O)[C@@H]2N[C@H](SC2(C)C)C(NC(=O)Cc3ccccc3)C(=O)NCc4ccccc4                                         | 2156.39 | nM |
| CHEMBL123370  | CN(CC1(CC(=O)C=C(O)O1)SCC2ccccc2)c3ccccc3)c4ccccc4                                                                                    | 2280    | nM |
| CHEMBL88443   | OC1=C(CCCO)c2ccccc2)C(=O)Oc3ccccc13                                                                                                   | 2300    | nM |
| CHEMBL314852  | OCc1cccc(OCCCC2=C(O)Oc3ccccc3C2=O)c1                                                                                                  | 2300    | nM |
| CHEMBL334126  | OC1=C(SCc2ccccc2)C(=O)CC3(CCCc4ccccc34)O1                                                                                             | 2300    | nM |
| CHEMBL12906   | Cc1cccc(C)c1CCC(=O)N[C@@H](Cc2ccccc2)[C@H](O)CN3CC[C@H](C)[C@H]3C(=O)NC(C)(C)OCc4ccccc4                                               | 2400    | nM |

|               |                                                                                                                                     |         |    |
|---------------|-------------------------------------------------------------------------------------------------------------------------------------|---------|----|
| CHEMBL118872  | <chem>O[C@H]([C@@H](COc1ccccc1)OCc2ccccc2)[C@H](O)[C@@H](COCc3ccccc3)OCc4ccccc4</chem>                                              | 2400    | nM |
| CHEMBL69604   | <chem>CC(C)(C)OC(=O)N[C@@H](Cc1ccccc1)[C@H](O)CN[C@@H](Cc2ccccc2)C(=O)N[C@@H]3[C@H](O)Cc4ccccc34</chem>                             | 2418.68 | nM |
| CHEMBL414635  | <chem>CC(C)c1ccccc1SC2=C(O)OC(CCC(=O)N3CCOCC3)(CC2=O)c4ccccc4</chem>                                                                | 2440    | nM |
| CHEMBL173655  | <chem>OC1=C(C(Sc2ccccc2)C3CCCCC3)C(=O)C=C(O1)c4ccccc4</chem>                                                                        | 2440    | nM |
| CHEMBL172909  | <chem>OC1=C(C(Sc2ccc3ccccc3e2)e4ccccc4)C(=O)C=C(O1)c5ccccc5</chem>                                                                  | 2450    | nM |
| CHEMBL45627   | <chem>C\C=C\C\C=C\C\CCC(=O)[C@H]1O[C@H]1C(=O)N</chem>                                                                               | 2500    | nM |
| CHEMBL13075   | <chem>Cc1ccccc1CCC(=O)N[C@@H](Cc2ccccc2)[C@H](O)CN3CC[C@H](C[C@H]3C(=O)NC(C)(C)C)OCc4ccccc4</chem>                                  | 2500    | nM |
| CHEMBL14707   | <chem>OC1=C(SCe2ccccc2)C(=O)C=C(O1)c3ccccc3Cl</chem>                                                                                | 2540    | nM |
| CHEMBL3084791 | <chem>CC(C)[C@H](NC(=O)OCc1ccccc1)C(=O)N[C@@H](Cc2ccccc2)CC3(C[C@H](Cc4ccccc4)NC(=O)[C@@H](NC(=O)OCc5ccccc5)C(C)C)CC(C(=O)N3</chem> | 2700    | nM |
| CHEMBL422928  | <chem>CC(C)(C)OC(=O)N[C@@H](Cc1ccccc1)[C@@H](O)C[C@@H](Cc2ccccc2)C(=O)NCCc3ccccc3</chem>                                            | 2800    | nM |
| CHEMBL2113708 | <chem>CC(C)(C)OC(=O)N[C@H](CCNC[C@@H](O)[C@H](Cc1ccccc1)NC(=O)OC(C)(C)C)Cc2ccccc2</chem>                                            | 2900    | nM |
| CHEMBL356524  | <chem>OC1=C(C(C=C)c2ccccc2)C(=O)CC3(CCCC3)O1</chem>                                                                                 | 3000    | nM |
| CHEMBL439641  | <chem>CC(=O)N[C@H]1CCCC[C@@H]1NC(=O)[C@@H](CC(O)C[C@@H](Cc2ccccc2)C(=O)N[C@H]3CCCC[C@@H]3NC(=O)C)Cc4ccccc4</chem>                   | 3000    | nM |
| CHEMBL141176  | <chem>CCC(C1=C(O)OC2(CCCCCC2)CC1=O)c3ccccc3</chem>                                                                                  | 3000    | nM |
| CHEMBL9409    | <chem>CC(C)(C)OC(=O)N[C@@H](Cc1ccccc1)C(O)[C@H](Cc2ccccc2)NC(=O)OC(C)(C)C</chem>                                                    | 3000    | nM |
| CHEMBL310487  | <chem>OC1=C(Sc2ccccc2)C(=O)C=C(O1)c3ccccc3</chem>                                                                                   | 3049.59 | nM |
| CHEMBL121035  | <chem>OC(C(COCc1ccc(cc1)C#N)OCc2ccc(cc2)C#N)C(O)C(COCc3ccc(cc3)C#N)OCc4ccc(cc4)C#N</chem>                                           | 3100    | nM |
| CHEMBL154798  | <chem>CC(C)CCN(C[C@@H](O)[C@H](Cc1ccccc1)NC(=O)OCc2ccccc2)S(=O)(=O)C</chem>                                                         | 3200    | nM |
| CHEMBL16796   | <chem>OC(C(COCc1ccc(Cl)cc1)OCc2ccccc2)C(O)C(COCc3ccc(Cl)cc3)OCc4ccccc4</chem>                                                       | 3224.9  | nM |
| CHEMBL92492   | <chem>COc1ccc2C(=C(CCCCc3ccccc3OC)C(=O)O)c2c1O</chem>                                                                               | 3300    | nM |
| CHEMBL332379  | <chem>OC(C(COCc1ccc(F)cc1F)OCc2ccccc2)C(O)C(COCc3ccc(F)cc3F)OCc4ccccc4</chem>                                                       | 3304.54 | nM |
| CHEMBL121243  | <chem>Cc1ccc(COCC(OCc2ccccc2)C(O)C(O)C(COCc3ccc(C)cc3)OCc4ccccc4)cc1</chem>                                                         | 3331.67 | nM |
| CHEMBL48147   | <chem>O[C@H](CNC[C@@H](O)[C@H](Cc1ccccc1)NC(=O)OCc2ccccc2)[C@@H](Cc3ccccc3)NC(=O)OCc4ccccc4</chem>                                  | 3400    | nM |
| CHEMBL14342   | <chem>OC1=C(SCc2ccc3OCCOc3e2)C(=O)C=C(O1)c4ccccc4</chem>                                                                            | 3420    | nM |
| CHEMBL121327  | <chem>OCc1ccc(COC(COCc2ccccc2)C(O)C(O)C(COCc3ccccc3)OCc4ccc(CO)cc4)cc1</chem>                                                       | 3464.1  | nM |
| CHEMBL120694  | <chem>OC(C(COCc1ccccc1)OCc2ccc(Br)cc2)C(O)C(COCc3ccccc3)OCc4ccc(Br)cc4</chem>                                                       | 3549.65 | nM |
| CHEMBL314409  | <chem>OP1(=O)C(Cc2ccccc2)N(Cc3ccc(CBr)cc3)C(=O)N(Cc4ccc(CBr)cc4)C1Cc5ccccc5</chem>                                                  | 3549.65 | nM |
| CHEMBL91773   | <chem>NC(=O)c1cccc(OCCCC2=C(O)Oc3ccccc3C2=O)c1</chem>                                                                               | 3900    | nM |
| CHEMBL298572  | <chem>CC(C)(C)CC(=O)N[C@@H](Cc1ccccc1)[C@H](O)CNC[C@@H](O)[C@H](Cc2ccccc2)NC(=O)OC(C)(C)C</chem>                                    | 4000    | nM |
| CHEMBL69731   | <chem>O[C@@H]1[C@@H](O)[C@@H](CCc2ccccc2)N(Cc3ccccc3)C(=O)N(Cc4ccccc4)[C@@H]1CCc5ccccc5</chem>                                      | 4000    | nM |
| CHEMBL88511   | <chem>OC1=C(CCCOc2ccccc2)[N+](=O)[O-]C(=O)Oc3ccccc13</chem>                                                                         | 4000    | nM |
| CHEMBL90188   | <chem>OC1=C(CCOc2ccccc2)C(=O)Oc3ccccc13</chem>                                                                                      | 4000    | nM |
| CHEMBL120747  | <chem>COC(=O)c1ccc(COC(COCc2ccccc2)C(O)C(O)C(COCc3ccccc3)OCc4cc(cc4)C(=O)OC)cc1</chem>                                              | 4098.78 | nM |
| CHEMBL12886   | <chem>CC(C)(C)NC(=O)[C@@H]1C[C@@H](CCN1C[C@@H](O)[C@H](C</chem>                                                                     | 4200    | nM |

|               |                                                                                                                                                                          |         |    |
|---------------|--------------------------------------------------------------------------------------------------------------------------------------------------------------------------|---------|----|
|               | c2cccc2)NC(=O)CSc3cccc3)OCc4ccncc4                                                                                                                                       |         |    |
| CHEMBL161243  | COC(=O)[C@@H](\N=C/S)\[C@@H](NC(=O)[C@H](Cc1cccc1)NC(=O)[C@H](Cc2cccc2)NC(=O)[C@H](C)NC(=O)[C@H](C)NC(=O)OC(C)(C)C(C)C(C)C(C)C                                           | 4500    | nM |
| CHEMBL46316   | CC[C@@H](C)C(NC(=O)OC(C)(C)C)[C@H](O)CNC[C@@H](O)C(NC(=O)OC(C)(C)C)[C@@H](C)CC                                                                                           | 4500    | nM |
| CHEMBL382513  | COc1cc(Br)c(cc1OC)C(=O)N[C@@H](Cc2cccc(Br)c2)[C@H](O)C[C@H](CCc3ccc(Cl)cc3Cl)S(=O)(=O)c4ccc(F)cc4                                                                        | 4500    | nM |
| CHEMBL419560  | CCNC(=O)[C@@H](NC(=O)c1cccc1Nc2cccc2)[C@@H]3N[C@@H](C(=O)NCCNC(=O)[C@@H]4N[C@H](SC4(C)C)[C@H](NC(=O)c5cccc5Nc6cccc6)C(=O)NCC)C(C)(C)S3                                   | 4800    | nM |
| CHEMBL120466  | OC(C(COCc1cccc1)OCc2ccc(cc2)C#N)C(O)C(COCc3cccc3)OCc4ccc(cc4)C#N                                                                                                         | 4818.71 | nM |
| CHEMBL113559  | CC(C)CN(C[C@@H](O)[C@@H](NC(=O)O)[C@@H]1CCOC1)Sc2ccc(cc2)S(=O)(=O)c3ccc(N)cc3                                                                                            | 4835.29 | nM |
| CHEMBL2111673 | C[C@H](C1=C(O)[C@](CCc2cccc2)(OC1=O)C(=O)NCc3ccc(cc3)C(C)(C)C)c4cccc4                                                                                                    | 4983.97 | nM |
| CHEMBL124434  | COC(=O)[C@@H](NC(=O)[C@H](OCc1cccc1)[C@H](O)[C@@H](O)[C@@H](OCc2cccc2)C(=O)N[C@@H](C(C)C)C(=O)OC)C(C)CO=C(N[C@@H](Cc1cccc1)C(=O)N2CCC(=O)C2Sc3cccc3)c4ccc5ccc5n4         | 5000    | nM |
| CHEMBL302877  | CC(C)(C)NC(=O)[C@@H]1C[C@@H](O)CN1CC(O)CNC(=O)[C@@H]2N[C@H](SC2(C)C)C(NC(=O)Cc3cccc3)C(=O)NCc4cccc4                                                                      | 5100    | nM |
| CHEMBL121923  | CCCC1(CC(=O)C(=C(O)O1)SCC2cccc2)c3cccc3                                                                                                                                  | 5100    | nM |
| CHEMBL125639  | Cc1cccc1CSC2=C(O)C=C(OC2=O)c3cccc3                                                                                                                                       | 5370    | nM |
| CHEMBL278942  | OC1=C(CCCN(c2cccc2)c3ccc(F)cc3)C(=O)Oc4cccc14                                                                                                                            | 5500    | nM |
| CHEMBL315189  | C[C@H](N(C[C@@H](O)[C@H](Cc1cccc1)NC(=O)[C@H](CC(=O)N)NC(=O)OCc2cccc2)C(=O)NC(C)(C)C)c3cccc3                                                                             | 5757.6  | nM |
| CHEMBL607102  | CC(C)(C)NC(=O)[C@@H]1CCCN1C[C@@H](O)[C@@H]2Cc3ccc(OCCCOC4cc5cccc5cc4C(=O)N[C@@H](CC(=O)N)C(=O)N2)cc3                                                                     | 6000    | nM |
| CHEMBL305289  | CC(C)(C)COC(=O)N[C@@H](Cc1cccc1)[C@H](O)CNC[C@@H](O)[C@H](Cc2cccc2)NC(=O)OCC(C)(C)C                                                                                      | 6000    | nM |
| CHEMBL49341   | OC(C(COCc1ccc(cc1)C(F)(F)F)OCc2ccc(cc2)C(F)(F)F)C(O)C(COCc3ccc(cc3)C(F)(F)F)OCc4ccc(cc4)C(F)(F)F                                                                         | 6000    | nM |
| CHEMBL120693  | OC1=C(SCc2cccc2)C(=O)C=C(O1)c3cccc3O                                                                                                                                     | 6000    | nM |
| CHEMBL14620   | OC(=O)c1cccc(CSC2=C(O)C=C(OC2=O)c3cccc3)c1                                                                                                                               | 6150    | nM |
| CHEMBL14855   | C[C@H](N(CC(O)CNC(=O)[C@@H]1N[C@H](SC1(C)C)C(NC(=O)Cc2cccc2)C(=O)NCc3cccc3)CC4CCCC4)C(=O)NC(C)(C)C                                                                       | 6400    | nM |
| CHEMBL331741  | Ne1cccc(OCCCC2=C(O)Oc3cccc3C2=O)c1                                                                                                                                       | 6400    | nM |
| CHEMBL92171   | CC(C)[C@H](NC(=O)C(O)(c1cccc1)c2cccc2)C(=O)N[C@@H](Cc3cccc3)[C@@H](O)[C@H](O)[C@H](Cc4cccc4)NC(=O)[C@@H](NC(=O)C(O)(c5cccc5)c6cccc6)C(C)C                                | 6400    | nM |
| CHEMBL322644  | CC(C)(C)NC(=O)[C@@H]1CCCCN1C[C@@H](O)CNC(=O)[C@@H]2N[C@H](SC2(C)C)C(NC(=O)Cc3cccc3)C(=O)NCc4cccc4                                                                        | 6500    | nM |
| CHEMBL273621  | CC(C)(C)OC(=O)[C@@H]1CCCN1C[C@@H](O)[C@H](Cc2cccc2)NC(=O)OCc3cccc3                                                                                                       | 6500    | nM |
| CHEMBL3349992 | Cc1ccc(COCC(OCc2ccc(C)cc2)C(O)C(O)C(COCc3ccc(C)cc3)OCc4ccc(C)cc4)cc1                                                                                                     | 7000    | nM |
| CHEMBL261987  | CN(C)c1ccc(cc1)C(=O)OCC(OC(=O)c2ccc(cc2)N(C)C)C3=C(C)c4cc5[nH]c(cc6[nH]c(cc7nc(cc3n4)c(C)c7C(COC(=O)c8ccc(cc8)N(C)C)OC(=O)c9ccc(cc9)N(C)C)c(C)c6CCC(=O)O)C(=C5C)CCC(=O)O | 7000    | nM |
| CHEMBL442513  | CC(C)(C)NC(=O)c1cc(ccc1CCC(O)Cc2ccc(cc2C(=O)NC(C)(C)C)C(C)(C)C(C)C                                                                                                       | 7000    | nM |
| CHEMBL96857   | OC(=O)c1cccc(OCCCC2=C(O)Oc3cccc3C2=O)c1                                                                                                                                  | 7000    | nM |
| CHEMBL90889   | OC(C(COCc1cccc1)OCc2ccc(cc2)C(F)(F)F)C(O)C(COCc3cccc3)OCc4ccc(cc4)C(F)(F)F                                                                                               | 7000    | nM |
| CHEMBL120261  |                                                                                                                                                                          | 7071.07 | nM |

|               |                                                                                                                                                                                                   |          |    |
|---------------|---------------------------------------------------------------------------------------------------------------------------------------------------------------------------------------------------|----------|----|
| CHEMBL14931   | <chem>Cc1ccc(cc1)C2=CC(=C(SCc3ccccc3)C(=O)O2)O</chem>                                                                                                                                             | 7493.38  | nM |
| CHEMBL107001  | <chem>CC1(C)S[C@H](CNC(=O)Cc2ccccc2)N[C@H]1C(=O)NCCNC(=O)[C@@H]3N[C@@H](CNC(=O)Cc4ccccc4)SC3(C)C</chem>                                                                                           | 7800     | nM |
| CHEMBL352550  | <chem>OC1=C(C(Sc2ccccc2)c3ccc4ccccc4c3)C(=O)C=C(O1)c5ccccc5</chem>                                                                                                                                | 7820     | nM |
| CHEMBL171235  | <chem>COC(=O)c1ccc(CN2[C@H](COc3ccccc3)[C@H](O)[C@@H](O)[C@@H](COc4ccccc4)N(Cc5ccc(cc5)C(=O)OC)C2=O)cc1</chem>                                                                                    | 8000     | nM |
| CHEMBL67968   | <chem>CC(C)[C@H](NC(=O)OCc1ccccc1)C(=O)N[C@@H](Cc2ccccc2)[C@H](O)CNC(=O)CCC(=O)NC(C)(C)C</chem>                                                                                                   | 8250     | nM |
| CHEMBL299429  | <chem>CN([C@@H](Cc1ccccc1)[C@H](O)CNC[C@@H](O)[C@H](Cc2ccccc2)NC(=O)OC(C)(C)C)C(=O)OC(C)(C)C</chem>                                                                                               | 8500     | nM |
| CHEMBL15001   | <chem>Cc1cccc(CSC2=C(O)C=C(OC2=O)c3ccccc3)c1</chem>                                                                                                                                               | 8540     | nM |
| CHEMBL2115206 | <chem>CC(C)(C)OC(=O)N[C@@H](Cc1ccccc1)[C@H](O)CNC(C(O)c2ccccc2)C(=O)N[C@@H]3[C@H](O)Cc4ccccc34</chem>                                                                                             | 8549.85  | nM |
| CHEMBL326249  | <chem>CCNC(=O)[C@@H](NC(=O)Cc1ccccc1)[C@@H]2N[C@@H](C(=O)NCCNC(=O)[C@@H]3NCSC3(C)C)C(C)(C)S2</chem>                                                                                               | 8800     | nM |
| CHEMBL124921  | <chem>OC1=C(SCc2ccccc2)C(=O)CC(O1)c3ccccc3</chem>                                                                                                                                                 | 8900     | nM |
| CHEMBL290349  | <chem>CC(C)CN1C[C@@](O)(C[C@H]1C(=O)NC(C)(C)C)[C@H](CC2CCC(CC2)NC(=O)CC(C)(C)C</chem>                                                                                                             | 9000     | nM |
| CHEMBL21296   | <chem>OC1[C@H](Cc2ccccc2)N(CC3CC3)C(=O)N(CC4CC4)[C@H]1Cc5ccccc5</chem>                                                                                                                            | 9000     | nM |
| CHEMBL369126  | <chem>[O-][N+](=O)c1ccc2c(c1)C(=O)Oc3ccc(CBr)cc23</chem>                                                                                                                                          | 10000    | nM |
| CHEMBL355782  | <chem>O[C@@H]1[C@@H](O)[C@@H](CCc2ccccc2)N(Cc3ccccc3)C(=O)N(Cc4ccccc4)[C@@H]1CCCc5ccccc5</chem>                                                                                                   | 10000    | nM |
| CHEMBL419513  | <chem>CC(C)(C)NC(=O)[C@@H]1CCCN1C[C@@H](O)CCc2ccccc2C(=O)NC(C)(C)C</chem>                                                                                                                         | 10000    | nM |
| CHEMBL62621   | <chem>COc1ccc(C[C@H](NC(=O)OC(C)(C)C)C(=O)N2CCC(=O)[C@@H]2Sc3ccccc3)cc1</chem>                                                                                                                    | 10000    | nM |
| CHEMBL436088  | <chem>O[C@H](C[C@H](CCc1ccc(Cl)cc1Cl)S(=O)(=O)c2ccc(F)cc2)[C@H](Cc3ccccc3)NC(=O)COc4ccc(Cl)cc4Cl</chem>                                                                                           | 10000    | nM |
| CHEMBL155260  | <chem>CC(C)CCN(C[C@@H](O)[C@H](Cc1ccccc1)NC(=O)OCc2ccccc2)S(=O)(=O)Cc3ccccc3</chem>                                                                                                               | 10000    | nM |
| CHEMBL12161   | <chem>CC(C)(C)NC(=O)[C@@H]1C[C@@H](CCN1C[C@@H](O)[C@H](Cc2ccccc2)NC(=O)C=C)c3ccccc3OCc4cncnc4</chem>                                                                                              | 11000    | nM |
| CHEMBL121586  | <chem>OC(C(COCc1ccccc1)OCc2ccc(cc2)C(=O)O)C(O)C(COCc3ccccc3)OCc4ccc(cc4)C(=O)O</chem>                                                                                                             | 11401.75 | nM |
| CHEMBL125816  | <chem>OC1=C(SCc2ccccc2)C(=O)CC3(CCc4ccccc34)O1</chem>                                                                                                                                             | 11800    | nM |
| CHEMBL313331  | <chem>OC1=C(CCCN(Cc2ccccc2)c3ccccc3)C(=O)Oc4ccccc14</chem>                                                                                                                                        | 13000    | nM |
| CHEMBL70657   | <chem>COC(=O)[C@H](O)[C@H](Cc1ccccc1)NC(=O)[C@@H](NC(=O)[C@H](Cc2c[nH]c3ccccc23)NC(=O)C)C(C)C</chem>                                                                                              | 14000    | nM |
| CHEMBL217693  | <chem>CC1=C(C(COC(=O)c2ccccc2)OC(=O)c3ccccc3)c4cc5nc(cc6[nH]c(cc7[nH]c(cc1n4)C(=C7CCC(=O)O)C)c(CCC(=O)O)c6C)c(C(COC(=O)c8ccc(cc8)OC(=O)c9ccccc9)c5C</chem>                                        | 14000    | nM |
| CHEMBL384612  | <chem>CC1=C(C(COC(=O)c2ccc3ccccc3c2)OC(=O)c4ccc5ccccc5c4)c6cc7nc(cc8[nH]c(cc9[nH]c(cc1n6)C(=C9CCC(=O)O)C)c(CCC(=O)O)c8C)c(C(COC(=O)c%10ccc%11ccccc%11c%10)OC(=O)c%12ccc%13ccccc%13c%12)c7C</chem> | 14000    | nM |
| CHEMBL14698   | <chem>Cc1ccccc1C2=CC(=C(SCc3ccccc3)C(=O)O2)O</chem>                                                                                                                                               | 14160    | nM |
| CHEMBL142248  | <chem>OC[C@@]12C3N(Cc4ccccc4)C5[C@]6(CO)C(N(Cc7ccccc7)C1[C@@]3(CO)[C@H]6c8ccccc8)[C@@]5(CO)[C@@H]2c9ccccc9</chem>                                                                                 | 16100    | nM |
| CHEMBL348791  | <chem>COC(=O)[C@@H](NC(=O)[C@@H](NC(=O)[C@H](Cc1ccccc1)\N=C(/S)\[C@H](Cc2ccccc2)NC(=O)[C@H](C)NC(=O)[C@H](C)NC(=O)OC(C)(C)C)C(C)C</chem>                                                          | 18000    | nM |
| CHEMBL14373   | <chem>COC(=O)c1cccc(CSC2=C(O)C=C(OC2=O)c3ccccc3)c1</chem>                                                                                                                                         | 19330    | nM |
| CHEMBL331444  | <chem>NC(=O)c1ccc(COC(COCc2ccccc2)C(O)C(O)C(COCc3ccccc3)OCc4ccc(cc4)C(=O)N)cc1</chem>                                                                                                             | 20000    | nM |
| CHEMBL161488  | <chem>OC1(CCN(CC#CC(=O)c2ccccc2)CC1)c3ccc(Cl)cc3</chem>                                                                                                                                           | 20000    | nM |



|              |                                                                                                                                                                         |         |    |
|--------------|-------------------------------------------------------------------------------------------------------------------------------------------------------------------------|---------|----|
| CHEMBL325180 | CCC(C)[C@H](NC(=O)C[C@H](O)[C@H](CC(C)C)NC(=O)CC1C=C<br>CN2N1C(=O)C(CNCc3ccccc3)CCC2=O)C(=O)N[C@@H](Cc4ccccc4)<br>C(=O)N                                                | 21000   | nM |
| CHEMBL315009 | OP1(=O)C(Cc2ccccc2)N(Cc3ccccc3)C(=O)N(Cc4ccccc4)C1Cc5ccccc5                                                                                                             | 21000   | nM |
| CHEMBL89166  | OC1=C(SCCOc2ccccc2)C(=O)Oc3ccccc13                                                                                                                                      | 24000   | nM |
| CHEMBL14675  | OC(=O)c1ccccc1CSC2=C(O)C=C(OC2=O)c3ccccc3                                                                                                                               | 24760   | nM |
| CHEMBL94703  | CC(C)(C)NC(=O)c1ccccc1SCC(O)Cc2ccc3ccccc3c2C(=O)NC(C)(C)C<br>CC1(C)S[C@@H](N[C@H]1C(=O)N[C@H](CO)CCc2ccccc2)[C@H](<br>NC(=O)Cc3ccccc3)C(=O)NCc4ccccc4                   | 25000   | nM |
| CHEMBL319004 | OC1=C(CCCSc2ccccc2)C(=O)Oc3ccccc13                                                                                                                                      | 25495.1 | nM |
| CHEMBL88778  | OC1=C(CCCSc2ccccc2)C(=O)Oc3ccccc13                                                                                                                                      | 26000   | nM |
| CHEMBL69243  | CC(C)C[C@H](N1CCC(O)(CC1)[C@H](Cc2ccccc2)NC(=O)[C@@H](<br>NC(=O)OCc3ccccc3)C(C)C)C(=O)NC(C)(C)C<br>NCc1ccc(COC(COCc2ccccc2)C(O)C(O)C(COCc3ccccc3)OCc4ccc(CN<br>)cc4)cc1 | 26700   | nM |
| CHEMBL122655 | NC1C(OCc2ccccc2)OC(COC(=O)Nc3ccccc3)C(OCc4ccccc4)C1N                                                                                                                    | 27000   | nM |
| CHEMBL278187 | O[C@@H]1Cc2ccccc2[C@@H]1NC(=O)[C@H](Cc3ccccc3)N4CCC(<br>O)(CC4)[C@H](Cc5ccccc5)NC(=O)O[C@H]6CCOC6                                                                       | 28000   | nM |
| CHEMBL69250  | OC1(CC[N+]([O-])(C\C=C\C(=O)c2ccc(F)cc2)CC1)c3ccc(Cl)cc3                                                                                                                | 29700   | nM |
| CHEMBL160413 | OC1=C(CCCOC2CCCCC2)C(=O)Oc3ccccc13                                                                                                                                      | 30000   | nM |
| CHEMBL91457  | COC(=O)[C@@H](NC(=O)[C@@H](NC(=O)[C@H](Cc1ccccc1)NC(<br>=O)N[C@H](Cc2ccccc2)NC(=O)[C@H](C)NC(=O)[C@H](C)N)C(C)<br>C)C(C)C                                               | 30000   | nM |
| CHEMBL187239 | COc1ccc(cc1)[C@@H]2[C@@]3(CO)C4N(Cc5ccccc5)C6[C@@]7(CO<br>)C(N(Cc8ccccc8)C3[C@]4(CO)[C@H]7c9ccc(OC)cc9)[C@]26CO                                                         | 32400   | nM |
| CHEMBL142249 | CC(C)(C)NC(=O)[C@H](CC1CCCCC1)N2CC[C@](O)(C2)[C@H](Cc<br>3ccccc3)NC(=O)OC(C)(C)C                                                                                        | 33000   | nM |
| CHEMBL304135 | CC(C)(C)OC(=O)N[C@@H](Cc1ccccc1)C(O)CNC(Cc2ccccc2)C(=O)<br>NC(CO)c3ccccc3                                                                                               | 37000   | nM |
| CHEMBL431023 | OC1=C(CCCOCc2ccccc2)C(=O)Oc3ccccc13                                                                                                                                     | 38000   | nM |
| CHEMBL313167 | CC(C)[C@H](NC(=O)OCc1ccccc1)C(=O)N[C@@H](Cc2ccccc2)C3(O<br>)CCN(Cc4ccccc4)CC3                                                                                           | 38000   | nM |
| CHEMBL69362  | COc1ccccc1OCCCC2=C(O)Oc3ccccc3C2=O                                                                                                                                      | 38700   | nM |
| CHEMBL89631  | Cc1ccc2OC(=O)c3cc(ccc3c2c1)[N+](=O)[O-]                                                                                                                                 | 44000   | nM |
| CHEMBL182831 | Nc1ccc2c(c1)C(=O)Oc3ccc(CBr)cc23                                                                                                                                        | 50000   | nM |
| CHEMBL182782 | CC(C)(C)OC(=O)N[C@@H](Cc1ccccc1)[C@@H](O)CN(Cc2ccccc2)<br>NC(=O)OC(C)(C)C                                                                                               | 50000   | nM |
| CHEMBL330438 | COC(=O)[C@@H](NC(=O)[C@@H](NC(=O)[C@H](Cc1ccccc1)NC(<br>=O)[C@H](Cc2ccccc2)N=C(/S)\[C@H](C)NC(=O)[C@H](C)NC(=O)<br>OC(C)(C)C)C(C)C)C(C)C                                | 50000   | nM |
| CHEMBL434478 | CC(C)[C@@H](NC(=O)OC(C)(C)C)C(=O)NN(C[C@H](O)[C@H](Cc<br>1ccccc1)NC(=O)[C@@H](NC(=O)OC(C)(C)C)C(C)C)Cc2ccccc2                                                           | 51000   | nM |
| CHEMBL415698 | OC1[C@H](Cc2ccccc2)N(CC=C)C(=O)N(CC=C)[C@H]1Cc3ccccc3                                                                                                                   | 52000   | nM |
| CHEMBL22057  | OC1=C(CCOc2ccccc2)C(=O)Oc3ccccc13                                                                                                                                       | 53000   | nM |
| CHEMBL88855  | CCCCC=C(c1cc(Cl)c(O)c(c1)C(=O)NO)c2cc(Cl)c(O)c(c2)C(=O)NO                                                                                                               | 53000   | nM |
| CHEMBL113197 | OC1(CCN(CC#CC(=O)c2cccc(c2)c3ccccc3)CC1)c4ccc(Cl)cc4                                                                                                                    | 58000   | nM |
| CHEMBL159191 | N[C@@H](Cc1ccccc1)C(O)CN[C@@H](Cc2ccccc2)C(=O)NC3[C@H<br>(O)Cc4ccccc34                                                                                                  | 63000   | nM |
| CHEMBL313367 | CC(C)N1CCC(=C(C1)C(=O)NC(C)(C)C)CC(O)CCc2ccccc2C(=O)NC(<br>C)(C)C                                                                                                       | 63000   | nM |
| CHEMBL328536 | COC(=O)[C@H](O)[C@H](Cc1ccccc1)NC(=O)[C@@H](NC(=O)[C@<br>H](Cc2ccc(O)cc2)NC(=O)C)C(C)C                                                                                  | 70000   | nM |
| CHEMBL419630 | O\N=C(\CCC1=C(O)Oc2ccccc2C1=O)/c3ccccc3                                                                                                                                 | 71000   | nM |
| CHEMBL89376  | CCC(C1=C(O)OC(CC(C)C)(CC(C)C)CC1=O)c2ccccc2                                                                                                                             | 71000   | nM |
| CHEMBL142907 | OC1(CCN(C\C=C\C(=O)c2ccc(F)cc2)CC1)c3ccc(Cl)cc3                                                                                                                         | 75000   | nM |
| CHEMBL159101 | OC1(CCN(C\C=C\C(=O)c2ccc(F)cc2)CC1)c3ccc(Cl)cc3                                                                                                                         | 80000   | nM |

|              |                                                                              |        |    |
|--------------|------------------------------------------------------------------------------|--------|----|
| CHEMBL444869 | <chem>OC1=C(CSc2ccccc2)C(=O)C=C(O1)c3ccccc3</chem>                           | 84300  | nM |
| CHEMBL88145  | <chem>OCCCC1=C(O)Oc2ccccc2C1=O</chem>                                        | 86000  | nM |
| CHEMBL21291  | <chem>OC1[C@H](Cc2ccccc2)N(Cc3ccccc3)C(=O)N(Cc4ccccc4)[C@H]1Cc5ccccc5</chem> | 89000  | nM |
| CHEMBL91766  | <chem>OC1=C(CCC(=O)c2ccccc2)C(=O)Oc3ccccc13</chem>                           | 90000  | nM |
| CHEMBL182348 | <chem>Cc1ccc2OC(=O)c3cc(N)ccc3c2c1</chem>                                    | 100000 | nM |
| CHEMBL329047 | <chem>CC(C)(C)NC(=O)C1CCCCN1CC(O)CCc2ccccc2C(=O)NC(C)(C)C</chem>             | 100000 | nM |
| CHEMBL161613 | <chem>OC1(CCN(CC#CC(=O)c2ccc(cc2)c3ccccc3)CC1)c4ccc(Cl)cc4</chem>            | 100000 | nM |

## 8.2 Reverse training set

|              |                                                                       |      |    |
|--------------|-----------------------------------------------------------------------|------|----|
| CHEMBL338099 | <chem>Cc1nc(CCCCCC(=O)c2ccccc2)n3nc(ccc13)n4ccnc4</chem>              | 0.6  | nM |
| CHEMBL88677  | <chem>Fe1cccc(F)c1CC\N=C(/S)\Nc2ccc(Br)en2</chem>                     | 1    | nM |
| CHEMBL132756 | <chem>COc1ccc(F)c(CC\N=C(/S)\Nc2ccc(Br)en2)c1C#N</chem>               | 1    | nM |
| CHEMBL135380 | <chem>Clc1ccc(NC(=S)NCCN2C(=O)c3ccccc3C2=O)nc1</chem>                 | 1    | nM |
| CHEMBL253186 | <chem>COc1ccc(OC)c(CCNC(=S)Nc2ccc(Cl)en2)c1F</chem>                   | 1    | nM |
| CHEMBL37835  | <chem>CCOc1ccc(Cl)c([C@H]2C[C@H]2NC(=O)Nc3ccc(Cl)en3)c1F</chem>       | 1.4  | nM |
| CHEMBL37024  | <chem>CCOc1ccc(F)c([C@H]2C[C@H]2NC(=O)Nc3ccc(Cl)en3)c1F</chem>        | 1.55 | nM |
| CHEMBL37762  | <chem>Fe1cccc(F)c1[C@H]2C[C@H]2NC(=O)Nc3ccc(Cl)en3</chem>             | 2    | nM |
| CHEMBL38341  | <chem>COc1ccc(OC)c([C@H]2C[C@H]2NC(=O)Nc3ccc(Cl)en3)c1F</chem>        | 2    | nM |
| CHEMBL103706 | <chem>Fe1cc(F)c(CC\N=C(/S)\Nc2ccc(Cl)en2)c(F)c1</chem>                | 2    | nM |
| CHEMBL436376 | <chem>CCOc1ccc(F)c(CC\N=C(/S)\Nc2ccc(Br)en2)c1C#N</chem>              | 2    | nM |
| CHEMBL341201 | <chem>Clc1ccc(NC(=S)NCCN2C(=O)c3c(Cl)ccc(Cl)c3C2=O)nc1</chem>         | 2    | nM |
| CHEMBL436177 | <chem>CCOc1ccc(Cl)c(CC\N=C(/S)\Nc2ccc(Br)en2)c1F</chem>               | 2    | nM |
| CHEMBL162118 | <chem>CCN1c2nc(Cl)cc(C)c2NC(=O)c3cc(CSc4ccccc4)enc13</chem>           | 2.2  | nM |
| CHEMBL133658 | <chem>CCOc1ccc(Cl)c(C2CC2NC(=O)Nc3ccc(en3)C#N)c1F</chem>              | 2.7  | nM |
| CHEMBL287317 | <chem>COc1ccc(OC)c(CCNC(=O)Nc2ccc(Cl)en2)c1F</chem>                   | 3    | nM |
| CHEMBL36930  | <chem>Fe1cccc(F)c1CCNC(=O)Nc2ccc(Cl)en2</chem>                        | 3    | nM |
| CHEMBL85110  | <chem>CCC1=C(Sc2ccccc2)N(COCCOCc3ccccc3)C(=O)NC1=O</chem>             | 3    | nM |
| CHEMBL328258 | <chem>COc1ccccc1C(=O)CC\N=C(/S)\Nc2ccc(Br)en2</chem>                  | 3    | nM |
| CHEMBL88840  | <chem>Clc1ccc(NC(=S)NCCc2ccccc2)nc1</chem>                            | 3    | nM |
| CHEMBL91624  | <chem>Fe1cccc(F)c1C(=O)CC\N=C(/S)\Nc2ccc(Br)en2</chem>                | 3    | nM |
| CHEMBL435600 | <chem>COc1ccc(F)c(CC\N=C(/S)\Nc2ccc(en2)C#N)c1C#N</chem>              | 3    | nM |
| CHEMBL133195 | <chem>Brc1ccc(NC(=S)NCCn2nc3ccccc3n2)nc1</chem>                       | 3    | nM |
| CHEMBL334983 | <chem>COc1ccc(F)c(F)c1CC\N=C(/S)\Nc2ccc(Br)en2</chem>                 | 3    | nM |
| CHEMBL381134 | <chem>Cc1ccc(c(Br)c1)n2nnnc2SCC(=O)Nc3ccccc3[N+](=O)[O-]</chem>       | 3    | nM |
| CHEMBL382553 | <chem>Cc1c(Cl)cccc1n2nnnc2SCC(=O)Nc3ccccc3[N+](=O)[O-]</chem>         | 3    | nM |
| CHEMBL207839 | <chem>Cc1cc(C)c(c(C)c1)n2nnnc2SCC(=O)Nc3ccccc3[N+](=O)[O-]</chem>     | 3    | nM |
| CHEMBL207512 | <chem>Cc1cc(C)c(c(C)c1)n2nnnc2SCC(=O)Nc3ccc(cc3Cl)C(=O)N</chem>       | 3    | nM |
| CHEMBL206522 | <chem>NS(=O)(=O)c1ccc(NC(=O)CSc2nnnn2c3cc(Cl)ccc3Cl)c(Cl)c1</chem>    | 3    | nM |
| CHEMBL398766 | <chem>Cc1ccc(NC(=S)NCCc2c(F)cccc2F)nc1</chem>                         | 3    | nM |
| CHEMBL79339  | <chem>CCN1c2ncccc2C(=O)N(C)c3ccc(nc13)c4c[nH]c5ncccc45</chem>         | 3.1  | nM |
| CHEMBL133559 | <chem>CC(=O)c1ccc(F)c(C2CC2NC(=O)Nc3ccc(Br)en3)c1O</chem>             | 3.5  | nM |
| CHEMBL36424  | <chem>CCOc1ccc(F)c(CCNC(=O)Nc2ccc(Br)en2)c1Cl</chem>                  | 4    | nM |
| CHEMBL91332  | <chem>Fe1ccccc1C(=O)CC\N=C(/S)\Nc2ccc(Br)en2</chem>                   | 4    | nM |
| CHEMBL134630 | <chem>Fe1ccoc1CC\N=C(/S)\Nc2ccc(Cl)en2</chem>                         | 4    | nM |
| CHEMBL379722 | <chem>Cc1cc(C)c(c(C)c1)n2nnnc2SCC(=O)Nc3ccc(cc3Cl)S(=O)(=O)N</chem>   | 4    | nM |
| CHEMBL205152 | <chem>Cc1cc(C)c(c(C)c1)n2nnnc2SCC(=O)Nc3ccc(Cl)cc3[N+](=O)[O-]</chem> | 4    | nM |
| CHEMBL206962 | <chem>[O-][N+](=O)c1ccccc1NC(=O)CSc2nnnn2c3c(Cl)cccc3Cl</chem>        | 4    | nM |
| CHEMBL207929 | <chem>[O-][N+](=O)c1ccccc1NC(=O)CSc2nnnn2c3cc(Cl)ccc3Cl</chem>        | 4    | nM |

|              |                                                            |      |    |
|--------------|------------------------------------------------------------|------|----|
| CHEMBL252964 | CCOc1ccc(F)c(CCNC(=S)Nc2ccc(Br)cn2)c1F                     | 4    | nM |
| CHEMBL253169 | COCc1ccc(F)c(CCNC(=S)Nc2ccc(Br)cn2)c1F                     | 4    | nM |
| CHEMBL38318  | CCOc1ccc(F)c([C@H]2C[C@H]2NC(=O)Nc3ccc(en3)C#N)c1Cl        | 4.15 | nM |
| CHEMBL421841 | CCN1c2necc(C)c2NC(=O)c3cc(CSc4cc(C)nc(C)c4)cnc13           | 4.2  | nM |
| CHEMBL134026 | CCC(=O)c1ccc(F)c(C2CC2NC(=O)Nc3ccc(Br)cn3)c1O              | 4.27 | nM |
| CHEMBL399976 | CCOc1cccc(F)c1CCNC(=S)Nc2ccc(C)cn2                         | 4.5  | nM |
| CHEMBL134278 | CCC(=O)c1ccc(F)c(C2CC2NC(=O)Nc3ccc(Cl)cn3)c1O              | 4.93 | nM |
| CHEMBL135259 | CCOc1ccc(F)c(CC\N=C(/S)\N[n+ ]2ccc(Cl)cn2)c1Cl             | 5    | nM |
| CHEMBL135254 | COc1ccc(F)c(CC\N=C(/S)\Nc2ccc(Cl)cn2)c1C#N                 | 5    | nM |
| CHEMBL377010 | Cc1cc(C)c(c(C)c1)n2nnnc2SCC(=O)Nc3ccccc3Cl                 | 5    | nM |
| CHEMBL207900 | [O-][N+](=O)c1ccccc1NC(=O)CSc2nnnn2c3cccc4ccccc34          | 5    | nM |
| CHEMBL207920 | CN(C)CCCNC(=O)c1ccc(NC(=O)CSc2nnnn2c3c(C)cc(C)cc3C)c(Cl)c1 | 5    | nM |
| CHEMBL400547 | CCc1csc(NC(=S)NCCc2c(F)cccc2F)n1                           | 5    | nM |
| CHEMBL429488 | CCOc1ccc(F)c(CCNC(=S)Nc2ccc(en2)C#N)c1Cl                   | 5    | nM |
| CHEMBL253822 | COc1ccc(OC)c(CCNC(=S)Nc2ccc(Cl)cn2)c1                      | 5    | nM |
| CHEMBL402265 | CCOc1ccc(F)c(F)c1CCNC(=S)Nc2ccc(Br)cn2                     | 5    | nM |
| CHEMBL399503 | CCOc1ccc(OC)c(CCNC(=S)Nc2ccc(Cl)cn2)c1F                    | 5    | nM |
| CHEMBL131972 | CCOc1ccc(Cl)c(C2CC2NC(=O)Nc3cc(Cl)cnn3)c1F                 | 5.2  | nM |
| CHEMBL135105 | CC(=O)c1ccc(F)c(C2CC2NC(=O)Nc3ccc(en3)C#N)c1O              | 5.3  | nM |
| CHEMBL129    | CC1=CN([C@H]2C[C@H](N=[N+]=[N-])[C@@H](CO)O2)C(=O)NC1=O    | 6    | nM |
| CHEMBL436546 | CC(C)C1=C(Cc2ccccc2)N(COCc3ccccc3)C(=O)NC1=O               | 6    | nM |
| CHEMBL88710  | Fc1cccc(F)c1C(=O)CC\N=C(/S)\Nc2ccc(Cl)cn2                  | 6    | nM |
| CHEMBL351728 | CCN1c2nc(Cl)cc(C)c2NC(=O)c3cc(CSc4nc(C)cc(C)n4)cnc13       | 6    | nM |
| CHEMBL252137 | Fc1cccc(Cl)c1CCNC(=S)Nc2nccs2                              | 6    | nM |
| CHEMBL254007 | Fc1cccc(F)c1CCNC(=S)Nc2nc(es2)C#N                          | 6    | nM |
| CHEMBL253369 | CCOc1cccc(F)c1CCNC(=S)Nc2ccc(Br)cn2                        | 6    | nM |
| CHEMBL398890 | COc1ccc(F)c(CCNC(=S)Nc2ccc(Br)cn2)c1F                      | 6    | nM |
| CHEMBL253170 | CCOc1ccc(F)c(CCNC(=S)Nc2ccc(Cl)cn2)c1Cl                    | 6    | nM |
| CHEMBL132425 | CCC(=O)c1ccc(F)c(C2CC2NC(=O)Nc3ccc(en3)C#N)c1O             | 6.8  | nM |
| CHEMBL162383 | CCN1c2nc(F)cc(C)c2NC(=O)c3cc(CSc4cc(C)nc(C)c4)cnc13        | 6.9  | nM |
| CHEMBL37834  | CCOc1ccc(OC)c([C@H]2C[C@H]2NC(=O)Nc3ccc(Br)cn3)c1F         | 7    | nM |
| CHEMBL137111 | COc1ccc(F)c(CC\N=C(/S)\Nc2ccc(Br)cn2)c1OC                  | 7    | nM |
| CHEMBL164261 | CCN1c2nc(Cl)cc(C)c2NC(=O)c3cc(CSc4cc(C)nc(C)c4)cnc13       | 7    | nM |
| CHEMBL381513 | Cc1cc(C)c(c(C)c1)n2nnnc2SCC(=O)Nc3ccccc3Br                 | 7    | nM |
| CHEMBL443063 | CN(C)c1ccc(F)c(CCNC(=S)Nc2ccc(Br)cn2)c1F                   | 7    | nM |
| CHEMBL100980 | CCN1c2nc(Cl)ccc2N(C)C(=O)c3cc(CSc4ccccc4)cnc13             | 7.75 | nM |
| CHEMBL37025  | CCOc1ccc(F)c([C@H]2C[C@H]2NC(=O)Nc3ccc(Cl)cn3)c1Cl         | 8    | nM |
| CHEMBL35729  | CCOc1ccc(OC)c(CCNC(=O)Nc2ccc(Cl)cn2)c1F                    | 8    | nM |
| CHEMBL83412  | CCc1cc(NCc2cc(C)c(C)cc2OC)c(O)nc1C                         | 8    | nM |
| CHEMBL88729  | Brc1ccc(NC(=S)N[C@@H]2C[C@@H]2c3ccccc3)nc1                 | 8    | nM |
| CHEMBL135808 | CN(C)c1ccc(CC\N=C(/S)\Nc2ccc(Br)cn2)c(F)c1C#N              | 8    | nM |
| CHEMBL422371 | CCN1c2ncc(CSc3oc4ccccc4n3)cc2C(=O)Nc5c(C)cc(Cl)nc15        | 8    | nM |
| CHEMBL252963 | CN(C)c1ccc(F)c(CCNC(=S)Nc2ccc(Cl)cn2)c1F                   | 8    | nM |
| CHEMBL253171 | CCOc1ccc(F)c(CCNC(=S)Nc2ccc(I)cn2)c1Cl                     | 8    | nM |
| CHEMBL84621  | CCc1cc(NCc2cc(C)c(C)nc2OC)c(O)nc1C                         | 9    | nM |
| CHEMBL319224 | Fc1ccc(C#N)c(F)c1CC\N=C(/S)\Nc2ccc(Cl)cn2                  | 9    | nM |
| CHEMBL383088 | NS(=O)(=O)c1ccc(NC(=O)CSc2nnnn2c3cccc(Cl)c3Cl)c(Cl)c1      | 9    | nM |
| CHEMBL78882  | Clc1ccc2NC(=O)NC(C#Cc3occcc3)(C4CC4)c2c1                   | 9.2  | nM |
| CHEMBL88397  | Clc1ccccc1C(=O)CCNC(=S)Nc2ccc(Br)cn2                       | 10   | nM |

|              |                                                                  |       |    |
|--------------|------------------------------------------------------------------|-------|----|
| CHEMBL142837 | CCN1c2neccc2C(=O)Nc3c(C)cc(Cl)nc13                               | 10    | nM |
| CHEMBL144744 | CCN1c2nc(cc(C)c2NC(=O)c3cccnc13)N(C)CCO                          | 10    | nM |
| CHEMBL366017 | CCN1c2nc(Cl)ccc2N(C)C(=O)c3cc(CCOe4ccc(cc4C)C(=O)O)enc13         | 10    | nM |
| CHEMBL381888 | CC1CN(C2C[C@H](CO)C(C2)N=[N+]=[N-])C(=O)NC1=O                    | 10    | nM |
| CHEMBL205764 | [O-][N+](=O)c1ccccc1NC(=O)CSc2nnnn2c3cc(F)ccc3Cl                 | 10    | nM |
| CHEMBL250438 | COc1cccc(F)c1CCNC(=S)Nc2nccs2                                    | 10    | nM |
| CHEMBL438146 | CCOc1cccc(F)c1CCNC(=S)Nc2nccs2                                   | 10    | nM |
| CHEMBL252136 | Fe1cccc(F)c1CCNC(=S)Nc2nccs2                                     | 10    | nM |
| CHEMBL81227  | Clc1ccc2NC(=O)NC(C#Cc3cccc3C#N)(C4CC4)c2c1                       | 10.8  | nM |
| CHEMBL79526  | Clc1ccc2NC(=O)NC(C#Cc3nccs3)(C4CC4)c2c1                          | 10.9  | nM |
| CHEMBL162272 | CCN1c2ncc(CSc3ccncc3C)cc2C(=O)Nc4c(C)cc(Cl)nc14                  | 11    | nM |
| CHEMBL171919 | CCc1cc(SCc2oc3c(Cl)ccc(Cl)c3n2)c(O)nc1C                          | 11    | nM |
| CHEMBL99235  | CCc1cc(CCc2oc3c(Cl)ccc(Cl)c3n2)c(O)nc1C                          | 11.59 | nM |
| CHEMBL106783 | Oc1ncccc1C(OCc2ccccc2)(C#Cc3ccccc3)C(F)(F)F                      | 11.69 | nM |
| CHEMBL320282 | Oc1ncccc1C(OCc2ccccc2)(C#CC3CC3)C(F)(F)F                         | 11.82 | nM |
| CHEMBL350538 | Cc1cc(SCc2cnc3N(C4CC4)c5nc(Cl)cc(C)c5NC(=O)c3c2)cc(C)n1          | 12    | nM |
| CHEMBL207105 | [O-][N+](=O)c1ccccc1NC(=O)CSc2nnnn2c3cccc(Cl)c3Cl                | 12    | nM |
| CHEMBL398891 | CCOc1ccc(F)c(CCNC(=S)Nc2ccc(Br)cn2)c1Cl                          | 12    | nM |
| CHEMBL82764  | [O-][N+](=O)c1ccccc1C#CC2(NC(=O)Nc3ccc(Cl)cc23)C4CC4             | 12.8  | nM |
| CHEMBL368116 | CCc1cc(CCc2oc3ccccc(F)c3n2)c(S)nc1C                              | 13    | nM |
| CHEMBL377820 | CN(C)CCCOc1ccc(NC(=O)CSc2nnnn2c3c(C)cc(C)cc3C)c(Cl)c1            | 13    | nM |
| CHEMBL192231 | CCN1c2neccc2N(C)C(=O)c3cc(CCOe4ccc5cc(ccc5c4)C(=O)O)enc13        | 14    | nM |
| CHEMBL336237 | CCc1c(C)nc(O)c(N)c1Sc2cc(C)cc(C)c2                               | 15    | nM |
| CHEMBL176362 | CCc1cc(CCc2oc3ccccc(F)c3n2)c(O)nc1C                              | 15    | nM |
| CHEMBL175162 | CCc1cc(CCc2oc3c(F)ccc(F)c3n2)c(S)nc1C                            | 15    | nM |
| CHEMBL191163 | CCN1c2ncc(CCOc3ccc(cc3C)C(=O)O)cc2C(=O)N(C)c4ccc(OC)nc14         | 15    | nM |
| CHEMBL189942 | CCN1c2nc(F)ccc2N(C)C(=O)c3cc(CCOe4ccc(cc4C)C(=O)O)enc13          | 15    | nM |
| CHEMBL133772 | CCOC(=O)NCCC=C(c1cc(C)c(OC)c(c1)C(=O)OC)c2cc(C)c(OC)c(c2)C(=O)OC | 16    | nM |
| CHEMBL336426 | CCOc1ccc(F)c(C2CC2NC(=O)Nc3cc(Cl)enn3)c1Cl                       | 16    | nM |
| CHEMBL320379 | Oc1ncccc1C(OCc2ccccc2)(\C=C\C3CC3)C(F)(F)F                       | 16.68 | nM |
| CHEMBL192530 | CCN1c2neccc2N(C)C(=O)c3cc(CCOe4ccc(cc4C)C(=O)O)enc13             | 17    | nM |
| CHEMBL80064  | Clc1ccc2NC(=O)NC(C#Cc3ccccc3)(C4CC4)c2c1                         | 17.7  | nM |
| CHEMBL57995  | Oc1ncc2c(F)c(F)ccc2n1                                            | 18    | nM |
| CHEMBL342771 | CCN1c2nc(ccc2N(C)C(=O)c3cccnc13)c4cccn4                          | 18    | nM |
| CHEMBL192790 | CCN1c2neccc2N(C)C(=O)c3cc(CCOe4ccc(cc4Br)C(=O)O)enc13            | 18    | nM |
| CHEMBL382454 | Cc1cccc(c1C)n2nnnc2SCC(=O)Nc3ccccc3[N+](=O)[O-]                  | 18    | nM |
| CHEMBL55445  | CCN1C(=O)c2cccnc2Oc3cc(C)cc(C#N)c13                              | 19    | nM |
| CHEMBL85947  | CC(C)Sc1nc(O)c(C)c(n1)C(C)c2c(F)cccc2F                           | 19    | nM |
| CHEMBL86109  | CCc1cc(CNc2cc(CC)c(C)nc2O)c(OC)nc1C                              | 19    | nM |
| CHEMBL189423 | CCN1c2nc(C)ccc2N(C)C(=O)c3cc(CCOe4ccc(cc4C)C(=O)O)enc13          | 19    | nM |
| CHEMBL189928 | CCN1c2neccc2N(C)C(=O)c3cc(CCOe4ccc(cc4CC)C(=O)O)enc13            | 19    | nM |
| CHEMBL314012 | CN1C(=O)Nc2ccc(Cl)cc2C1(C#Cc3cccn3)C4CC4                         | 19.6  | nM |
| CHEMBL37803  | CCc1cc(NCc2oc3c(C)ccc(C)c3n2)c(O)nc1C                            | 20    | nM |
| CHEMBL433489 | CN1C(=O)c2cc(N)ccc2Oc3cc(C)cc(C)c13                              | 20    | nM |
| CHEMBL85946  | CCC(C)Sc1nc(O)c(C)c(n1)C(C)c2c(F)cccc2F                          | 20    | nM |
| CHEMBL310803 | CSc1nc(O)c(C)c(n1)C(C)c2c(F)cccc2F                               | 20    | nM |
| CHEMBL102113 | CCN1c2ncc(CCc3ccnc(N)c3)cc2C(=O)N(C)c4ccc(Cl)nc14                | 20    | nM |
| CHEMBL101845 | CCN1c2ncc(CCc3ccc4ccccc4c3)cc2C(=O)N(C)c5ccc(F)nc15              | 20    | nM |
| CHEMBL102166 | CCN1c2neccc2N(C)C(=O)c3cc(COe4ccncc4)enc13                       | 20    | nM |

|              |                                                                                                        |       |    |
|--------------|--------------------------------------------------------------------------------------------------------|-------|----|
| CHEMBL103386 | CCN1c2nc(Cl)ccc2N(C)C(=O)c3cc(CSc4ccccc4)cnc13                                                         | 20    | nM |
| CHEMBL316796 | S=C(NCCc1ccccc1)Nc2cccn2                                                                               | 20    | nM |
| CHEMBL99896  | CN(C)c1cc(F)c(CC\N=C(/S)\Nc2ccc(Cl)cn2)c(F)c1                                                          | 20    | nM |
| CHEMBL338047 | CCC1=C(C)NC(=O)C(=C1Cc2cc(C)cc(C)c2)N(C)C                                                              | 20    | nM |
| CHEMBL343007 | Cc1cc(Cl)nc2N(C3CC3)c4ncccc4C(=O)Nc12                                                                  | 20    | nM |
| CHEMBL145199 | CCN1c2ncccc2C(=O)Nc3c(C)cc(F)nc13                                                                      | 20    | nM |
| CHEMBL145237 | CCN1c2ncccc2C(=O)N(C)c3ccc(nc13)c4cn[nH]c4                                                             | 20    | nM |
| CHEMBL144326 | CCN1c2nc(ccc2N(C)C(=O)c3ccnc13)N4CCCC4                                                                 | 20    | nM |
| CHEMBL342103 | CCN1c2ncccc2C(=O)Nc3c(C)cc(C)nc13                                                                      | 20    | nM |
| CHEMBL356744 | CCN1c2nc(SC)cc(C)c2NC(=O)c3ccnc13<br>COC(=O)CCC\C=C(/c1cc(C)c2OC(=O)N(C)c2c1)\c3cc(C)c(OC)c(c3)C(=O)OC | 20    | nM |
| CHEMBL212448 |                                                                                                        | 20    | nM |
| CHEMBL135509 | BrC1ccc(NC(=S)NCCC2=NC3C=CC=CC3N2)nc1                                                                  | 21    | nM |
| CHEMBL398837 | CCOc1c(Cl)cc(F)c(CCNC(=S)Nc2ccc(Br)cn2)c1Cl                                                            | 21    | nM |
| CHEMBL83622  | CCc1cc(CCc2oc3ccccc3n2)c(O)nc1C                                                                        | 21.45 | nM |
| CHEMBL298607 | COC(=O)c1cc(C)cc2Oc3ncccc3C(=O)N(C)c12                                                                 | 22    | nM |
| CHEMBL364043 | CCN1c2ncccc2N(C)C(=O)c3cc(CCOc4ccc(CCC(=O)O)cc4C)nc13                                                  | 22    | nM |
| CHEMBL204993 | Cc1cc(C)c(c(C)c1)n2nnnc2SCC(=O)Nc3ccc(cc3Cl)[N+](=O)[O-]                                               | 22    | nM |
| CHEMBL29274  | FC(F)(F)[C@]1(NC(=O)Nc2ccc(Cl)cc12)\C=C\C3CC3                                                          | 23    | nM |
| CHEMBL56051  | CN1C(=O)c2ccnc2Oc3cc(C)cc(c13)[N+](=O)[O-]                                                             | 23    | nM |
| CHEMBL87765  | CCc1cc(NCc2cc(C)ccc2OC)c(O)nc1C                                                                        | 23    | nM |
| CHEMBL317574 | CNC(=O)c1ccc(F)c(CC\N=C(/S)\Nc2ccc(Br)cn2)c1F                                                          | 23    | nM |
| CHEMBL339203 | Cc1nc(O)c(NCc2oc3c(Cl)ccc(Cl)c3n2)cc1C=C                                                               | 23    | nM |
| CHEMBL370699 | CCN1c2ncccc2N(C)C(=O)c3cc(CCOc4ccc(CC(=O)O)cc4C)nc13                                                   | 23    | nM |
| CHEMBL207527 | Cc1ccc(Cl)cc1n2nnnc2SCC(=O)Nc3ccccc3[N+](=O)[O-]                                                       | 23    | nM |
| CHEMBL172861 | CCc1cc(CCc2oc3ccccc3n2)c(S)nc1C                                                                        | 24    | nM |
| CHEMBL106694 | Oc1ncccc1C(Oc2cccc(Oc3ccccc3)c2)(C#CC4CC4)C(F)(F)F                                                     | 24.34 | nM |
| CHEMBL223228 | FC(F)(F)[C@]1(OC(=O)Nc2ccc(Cl)cc12)C#CC3CC3                                                            | 24.49 | nM |
| CHEMBL283950 | NC(=O)c1[nH]c2ccc(Cl)cc2c1S(=O)(=O)c3ccccc3                                                            | 25    | nM |
| CHEMBL39665  | CN(C)c1ccc(F)c(CCNC(=O)Nc2ccc(Br)cn2)c1F                                                               | 25    | nM |
| CHEMBL329720 | CCc1cc(CCc2oc3c(C)ccc(C)c3n2)c(O)nc1C                                                                  | 25.38 | nM |
| CHEMBL106997 | Oc1ncccc1C(OCc2ccnc2)(C#CC3CC3)C(F)(F)F                                                                | 25.56 | nM |
| CHEMBL104349 | Oc1ncccc1C(OCc2cccn2)(C#CC3CC3)C(F)(F)F                                                                | 26    | nM |
| CHEMBL162629 | CCN1c2nc(Cl)cc(C)c2NC(=O)c3cc(CSc4cncnc4)cnc13                                                         | 26    | nM |
| CHEMBL294171 | CCN1C(=O)c2cc(N)cnc2Oc3cc(C)cc(C)c13                                                                   | 27    | nM |
| CHEMBL162905 | CCN1c2ncc(CSc3cnc(C)c3)cc2C(=O)Nc4c(C)cc(Cl)nc14                                                       | 27    | nM |
| CHEMBL79338  | CCN1c2ncccc2C(=O)N(C)c3ccc(nc13)c4c[nH]c5ccccc45                                                       | 28    | nM |
| CHEMBL440860 | CCN1C(=O)c2ccnc2Oc3cc(C)cc(C)c13                                                                       | 29    | nM |
| CHEMBL174130 | CCc1cc(CCc2oc3c(Cl)cccc3n2)c(S)nc1C                                                                    | 29    | nM |
| CHEMBL416107 | CCc1c(C)nc(O)c(c1Sc2cc(C)cc(C)c2)[N+](=O)[O-]                                                          | 30    | nM |
| CHEMBL301222 | CN1C(=O)c2cc(N)ccc2Oc3cc(C)ccc13                                                                       | 30    | nM |
| CHEMBL100445 | CCN1c2ncc(COc3ccnc(C)c3)cc2C(=O)N(C)c4ccc(Cl)nc14                                                      | 30    | nM |
| CHEMBL319091 | CCN1c2ncccc2N(C)C(=O)c3cc(CCc4cncnc4)cnc13                                                             | 30    | nM |
| CHEMBL318002 | CCN1c2ncc(COc3cc[n+](c3)[O-])cc3)cc2C(=O)N(C)c4ccc(F)nc14                                              | 30    | nM |
| CHEMBL100981 | CCN1c2ncc(CSc3nccn3)cc2C(=O)N(C)c4ccc(Cl)nc14                                                          | 30    | nM |
| CHEMBL103953 | CCN1c2ncccc2N(C)C(=O)c3cc(CCc4cnc(C)c4)enc13                                                           | 30    | nM |
| CHEMBL108396 | COc1ccc(cc1)C(=O)CSC2=NC(=C(C(C)C)C(=O)N2)Cc3ccccc4ccccc34                                             | 30    | nM |
| CHEMBL144852 | CCN1c2ncccc2C(=O)N(C)c3ccc(nc13)N4CC=CC4                                                               | 30    | nM |
| CHEMBL144522 | CN1C(=O)c2ccnc2N(C3CC3)c4nc(Br)ccc14                                                                   | 30    | nM |
| CHEMBL147749 | S\C(=N/CCc1ccccc1N=[N+]=[N-])\Nc2nccs2                                                                 | 30    | nM |

|              |                                                                       |       |    |
|--------------|-----------------------------------------------------------------------|-------|----|
| CHEMBL172311 | <chem>CCc1cc(Cc2oc3c(Cl)ccc(Cl)c3n2)c(S)nc1C</chem>                   | 30    | nM |
| CHEMBL174419 | <chem>CCc1cc(Cc2oc3cccc(Cl)c3n2)c(S)nc1C</chem>                       | 30    | nM |
| CHEMBL366402 | <chem>CC1=C(Cc2c(F)cccc2F)N=C(NC3CCCC3)NC1=O</chem>                   | 30    | nM |
| CHEMBL252135 | <chem>COc1ccc(Br)cc1CCNC(=S)Nc2nccs2</chem>                           | 30    | nM |
| CHEMBL398765 | <chem>Cc1ccc(NC(=S)NCCc2cccc2)nc1</chem>                              | 30    | nM |
| CHEMBL291763 | <chem>CCN1C(=O)c2cccnc2Oc3cc(C)cc(c13)[N+](=O)[O-]</chem>             | 31    | nM |
| CHEMBL85059  | <chem>Cc1cc(C)cc(c1)S(=O)(=O)c2c([nH]c3ccc(Cl)cc23)C(=O)N</chem>      | 31    | nM |
| CHEMBL205999 | <chem>Cc1cc(C)c(c(C)c1)n2nnnc2SCC(=O)Nc3cccc3I</chem>                 | 31    | nM |
| CHEMBL81319  | <chem>CCN1c2ncccc2C(=O)N(C)c3ccc(nc13)c4cc[nH]c4</chem>               | 31.46 | nM |
| CHEMBL36995  | <chem>CCOCN1C(=O)NC(=O)C(=C1Sc2cccc2)CC</chem>                        | 32    | nM |
| CHEMBL82798  | <chem>CCc1ccc(OC)c(CNc2cc(CC)c(C)nc2O)c1</chem>                       | 32    | nM |
| CHEMBL87676  | <chem>CCc1cc(NC2ccc(C)cc2OC)c(O)nc1C</chem>                           | 32    | nM |
| CHEMBL83635  | <chem>CCc1cc(CNc2cc(CC)c(C)nc2O)c(OC)cc1C</chem>                      | 33    | nM |
| CHEMBL177016 | <chem>CCc1cc(Cc2oc3cccc(C)c3n2)c(O)nc1C</chem>                        | 33    | nM |
| CHEMBL84933  | <chem>CCc1cc(NC2cc3cccc3nc2OC)c(O)nc1C</chem>                         | 34    | nM |
| CHEMBL176957 | <chem>CCCc1cc(Cc2oc3c(Cl)ccc(Cl)c3n2)c(O)nc1C</chem>                  | 34    | nM |
| CHEMBL83888  | <chem>CCc1cc(NC2cc3CCCCc3nc2OC)c(O)nc1C</chem>                        | 35    | nM |
| CHEMBL368172 | <chem>CC(C1=C(C)C(=O)NC(=N1)NC2CCCC2)c3c(F)cccc3F</chem>              | 35    | nM |
| CHEMBL70629  | <chem>CCN1c2ccc(C)c(C)c2N(C)C(=O)c3ccnc13</chem>                      | 36    | nM |
| CHEMBL105863 | <chem>Oc1nc2cccc2cc1C(OCc3cccc3)(C#CC4CC4)C(F)(F)F</chem>             | 36.01 | nM |
| CHEMBL84900  | <chem>Cc1cc(C)cc(c1)C23SCCN2C(=O)c4cccc34</chem>                      | 36.66 | nM |
| CHEMBL367052 | <chem>CCc1cc(Cc2oc3c(F)cccc3n2)c(O)nc1C</chem>                        | 37    | nM |
| CHEMBL307220 | <chem>CCN1c2cccc(C)c2NC(=O)c3ccnc13</chem>                            | 38    | nM |
| CHEMBL309674 | <chem>CC(C1=CC(=O)NC(=N1)SC2CCCC2)c3c(F)cccc3F</chem>                 | 38.73 | nM |
| CHEMBL64233  | <chem>CC(C)C#C[C@@]1(NC(=O)Nc2ccc(F)cc12)C(F)(F)F</chem>              | 39    | nM |
| CHEMBL308907 | <chem>CCN1c2ncccc2C=Cc3ccnc13</chem>                                  | 40    | nM |
| CHEMBL439943 | <chem>CCN1c2cc(C)c(C)cc2N(C)C(=O)c3ccnc13</chem>                      | 40    | nM |
| CHEMBL314883 | <chem>CCc1cc(NC2cc3CCCCc3cc2OC)c(O)nc1C</chem>                        | 40    | nM |
| CHEMBL101946 | <chem>CCN1c2ncccc2N(C)C(=O)c3cc(Cc4cccc(N)c4)nc13</chem>              | 40    | nM |
| CHEMBL99747  | <chem>CCN1c2ncc(COc3ccnc(c3)C(F)(F)F)cc2C(=O)N(C)c4ccc(Cl)nc14</chem> | 40    | nM |
| CHEMBL328848 | <chem>CCN1c2ncccc2N(C)C(=O)c3cc(Cc4nccs4)nc13</chem>                  | 40    | nM |
| CHEMBL145397 | <chem>CCN1c2nc(OC)ccc2N(C)C(=O)c3ccnc13</chem>                        | 40    | nM |
| CHEMBL144851 | <chem>CCN1c2nc(cc(C)c2NC(=O)c3ccnc13)N4CCC(O)C4</chem>                | 40    | nM |
| CHEMBL144145 | <chem>CCN1c2nc(ccc2N(C)C(=O)c3ccnc13)c4ccc(N)cc4</chem>               | 40    | nM |
| CHEMBL344289 | <chem>CCN1c2ncccc2C(=O)N(C)c3ccc(nc13)c4cocc4</chem>                  | 40    | nM |
| CHEMBL177201 | <chem>CC(C1=CC(=O)NC(=N1)NC2CCCC2)c3c(F)cccc3F</chem>                 | 40    | nM |
| CHEMBL176443 | <chem>CCc1cc(Cc2oc3c(C)cccc3n2)c(O)nc1C</chem>                        | 40    | nM |
| CHEMBL254201 | <chem>COc1cccc1CCNC(=S)Nc2nccs2</chem>                                | 40    | nM |
| CHEMBL362936 | <chem>CCN1c2ncccc2N(C)C(=O)c3cc(CCOc4ccc(C(=O)O)c5cccc45)nc13</chem>  | 40.25 | nM |
| CHEMBL325343 | <chem>CCc1cc(c(O)nc1C)C(OCc2c(Cl)cccc2Cl)(C#CC3CC3)C(F)(F)F</chem>    | 41.1  | nM |
| CHEMBL280752 | <chem>CC(Sc1nc(N)cc(Cl)n1)c2cc3ccoc3cn2</chem>                        | 41.23 | nM |
| CHEMBL125336 | <chem>CCc1cc(NC2oc3c(Cl)ccc(Cl)c3n2)c(S)nc1C</chem>                   | 42    | nM |
| CHEMBL291987 | <chem>CCN1C(=O)c2cc(N)ccc2Oc3cc(C)cc(C)c13</chem>                     | 43    | nM |
| CHEMBL338263 | <chem>CSc1cc(NC2oc3c(Cl)ccc(Cl)c3n2)c(O)nc1C</chem>                   | 43    | nM |
| CHEMBL172583 | <chem>CCc1cc(Cc2oc3c(F)cccc3n2)c(S)nc1C</chem>                        | 43    | nM |
| CHEMBL313404 | <chem>CCc1cc(NC2nc3CCCCc3cc2OC)c(O)nc1C</chem>                        | 43.36 | nM |
| CHEMBL322004 | <chem>Oc1ncccc1C(OCc2cccc2)(\C=C\c3cccc3)C(F)(F)F</chem>              | 43.89 | nM |
| CHEMBL81441  | <chem>CCN1c2ncccc2C(=O)N(C)c3ccc(nc13)c4c[nH]c5nccc45</chem>          | 44    | nM |
| CHEMBL56501  | <chem>CC(C)N1C(=O)c2cc(N)nc2Oc3cc(C)c(C)cc13</chem>                   | 45    | nM |
| CHEMBL440706 | <chem>CCc1c(O)nc(SCC(=O)c2ccc(OC)cc2)nc1Cc3cccc4cccc34</chem>         | 45    | nM |

|              |                                                         |       |    |
|--------------|---------------------------------------------------------|-------|----|
| CHEMBL400708 | CC(=O)NCc1ccc(F)c(CCNC(=S)Nc2ccc(Br)cn2)c1F             | 45    | nM |
| CHEMBL31977  | CC1OC(\C=C\C2CC2)(c3cc(Cl)ccc3NC1=O)C(F)(F)F            | 46    | nM |
| CHEMBL56500  | CN1C(=O)c2cc(N)nc2Oc3cc(C)cc(C)c13                      | 46    | nM |
| CHEMBL431868 | CC(C)c1c(O)nc(SCC(=O)c2ccccc2)nc1Cc3cccc4cccc34         | 46    | nM |
| CHEMBL89195  | Fe1ccc(cc1)C(=O)CC\N=C(/S)\Nc2ccc(Br)cn2                | 47    | nM |
| CHEMBL135760 | CCOc1ccc(F)c(CC\N=C(/S)\Nc2nc(cs2)C(F)(F)F)c1Cl         | 47    | nM |
| CHEMBL176594 | CC(C)c1cc(CCc2oc3ccccc3n2)c(O)nc1C                      | 48    | nM |
| CHEMBL38679  | Cc1ncc([N+](=O)[O-])n1CCOC(c2ccccc2)c3ccccc3            | 50    | nM |
| CHEMBL54900  | CN1C(=O)c2cc(ccc2Oc3cc(C)cc(C)c13)C#N                   | 50    | nM |
| CHEMBL303089 | Fe1ccc2NC(=O)N[C@@](C#CC3CC3)(c2c1)C(F)(F)F             | 50    | nM |
| CHEMBL87393  | CCC(C)Sc1nc(O)cc(Cc2c(F)cccc2F)n1                       | 50    | nM |
| CHEMBL87451  | CC(C)SC1=NC(=CC(=O)N1)Cc2c(F)cccc2F                     | 50    | nM |
| CHEMBL87235  | CCC(C)Sc1nc(O)c(C)c(Cc2c(F)cccc2F)n1                    | 50    | nM |
| CHEMBL83140  | CC(C)SC1=NC(=C(C)C(=O)N1)Cc2c(F)cccc2F                  | 50    | nM |
| CHEMBL101412 | CCN1c2ncccc2N(C)C(=O)c3cc(CCc4cccc4)enc13               | 50    | nM |
| CHEMBL330416 | CCN1c2ncc(CCc3ccnc(c3)C(=O)N)cc2C(=O)N(C)c4ccc(Cl)nc14  | 50    | nM |
| CHEMBL102192 | CCN1c2nc(Cl)ccc2N(C)C(=O)c3cc(CCc4cccc4)enc13           | 50    | nM |
| CHEMBL100833 | CCN1c2nc(F)ccc2N(C)C(=O)c3cc(CCc4cncnc4)enc13           | 50    | nM |
| CHEMBL100352 | CCN1c2ncccc2N(C)C(=O)c3cc(CO)enc13                      | 50    | nM |
| CHEMBL102034 | CCN1c2nc(F)ccc2N(C)C(=O)c3cc(COe4cncnc4)enc13           | 50    | nM |
| CHEMBL101091 | CCN1c2ncc(COe3cccc(N)c3)cc2C(=O)N(C)c4ccc(Cl)nc14       | 50    | nM |
| CHEMBL317180 | CCN1c2ncc(CSc3[nH]enc4nnc34)cc2C(=O)N(C)c5ccc(Cl)nc15   | 50    | nM |
| CHEMBL341350 | Cc1nc(CCCCCC(=O)c2ccccc2)n3nc(ccc13)N4CCCC4             | 50    | nM |
| CHEMBL142659 | CCN1c2nc(ccc2N(C)C(=O)c3ccnc13)c4ccc(N)nc4              | 50    | nM |
| CHEMBL444080 | CCN1c2nc(OC)cc(CO)c2NC(=O)c3ccenc13                     | 50    | nM |
| CHEMBL422123 | CN1C(=O)c2ccnc2N(C3CC3)c4nc(ccc14)c5cc[nH]c5            | 50    | nM |
| CHEMBL196274 | COC(=O)CCC\C=C(\c1cc(C)c2ON(C)C(=O)c2c1)/c3cc(Cl)ccc3OC | 50    | nM |
| CHEMBL400546 | Cc1ccc(NC(=S)NCCc2cccn2)nc1                             | 50    | nM |
| CHEMBL268871 | CCc1cc(NCc2oc3c(Cl)ccc(Cl)c3n2)c(O)nc1C                 | 51.96 | nM |
| CHEMBL173575 | CCc1cc(CCc2oc3c(C)ccc(C)c3n2)c(S)nc1C                   | 52    | nM |
| CHEMBL62104  | CCC#C[C@@]1(NC(=O)Nc2ccc(F)cc12)C(F)(F)F                | 54    | nM |
| CHEMBL68137  | Oc1c(Cl)ccc2NC(=O)NC(C#CC3CC3)(c12)C(F)(F)F             | 54    | nM |
| CHEMBL88966  | Fe1ccccc1C(=O)CCNC(=O)Nc2ccc(Br)cn2                     | 54    | nM |
| CHEMBL208057 | Cc1cc(C)c(c(C)c1)n2nnnc2SCC(=O)Nc3ccc(cc3C)S(=O)(=O)N   | 54    | nM |
| CHEMBL56052  | CN1C(=O)c2ccnc2Oc3cc(C)cc(C#N)c13                       | 55    | nM |
| CHEMBL99992  | CCc1cc(NCc2oc3c(C)cccc3n2)c(O)nc1C                      | 55    | nM |
| CHEMBL207746 | Cc1cc(C)c(c(C)c1)n2nnnc2SCC(=O)Nc3ccc(cc3C)C(=O)N       | 55    | nM |
| CHEMBL56110  | CN1C(=O)c2ccccc2Oc3cc(C)cc(C)c13                        | 57    | nM |
| CHEMBL123636 | CCc1cc(NCc2oc3c(Cl)ccc(Cl)c3c2)c(O)nc1C                 | 57    | nM |
| CHEMBL125232 | CCc1cc(N(C)Cc2oc3c(Cl)ccc(Cl)c3n2)c(O)nc1C              | 58    | nM |
| CHEMBL176463 | CCc1cc(CCC2=NC3CCCC3O2)c(O)nc1C                         | 58    | nM |
| CHEMBL59458  | Fe1ccc2NC(=O)N[C@@](C#CC3CC3)(c2c1Cl)C(F)(F)F           | 59    | nM |
| CHEMBL292608 | CCN1C(=O)c2cc(N)ccc2Oc3ccccc(C)c13                      | 60    | nM |
| CHEMBL100136 | CCN1c2ncc(CCc3ccnc(C)c3)cc2C(=O)N(C)c4ccc(Cl)nc14       | 60    | nM |
| CHEMBL100934 | CCN1c2nc(Cl)ccc2N(C)C(=O)c3cc(CCc4cccc(NC(=O)N)c4)enc13 | 60    | nM |
| CHEMBL322869 | CCN1c2ncccc2N(C)C(=O)c3cc(CCc4ccc(N)cc4)enc13           | 60    | nM |
| CHEMBL329728 | CCN1c2ncc(CNc3ccccc(N)c3)cc2C(=O)N(C)c4ccc(Cl)nc14      | 60    | nM |
| CHEMBL123959 | CCN(CC)C(=O)\C=C\CSc1nc(N)cc(Cl)n1                      | 60    | nM |
| CHEMBL335202 | Clc1ccc(NC(=S)NCCc2occc2C#N)nc1                         | 60    | nM |
| CHEMBL142853 | CN1C(=O)c2ccnc2N(C3CC3)c4nc(ccc14)c5cn[nH]c5            | 60    | nM |

|              |                                                                          |       |       |
|--------------|--------------------------------------------------------------------------|-------|-------|
| CHEMBL157741 | <chem>CCC(C)Sc1nc(O)c(C)c(Cc2c(Cl)cccc2Cl)n1</chem>                      | 60    | nM    |
| CHEMBL253994 | <chem>Fe1cccc1CCNC(=S)Nc2nccs2</chem>                                    | 60    | nM    |
| CHEMBL254414 | <chem>CCOc1cccc(CCNC(=S)Nc2nccs2)c1</chem>                               | 60    | nM    |
| CHEMBL336635 | <chem>CCc1ccnc1N(C)C2CCN(CC2)C(=O)c3cc4cc(NS(=O)(=O)C)ccc4[nH]</chem>    | 3     | 61 nM |
| CHEMBL64722  | <chem>Fe1cccc2NC(=O)N[C@@](C#CC3CC3)(c12)C(F)(F)F</chem>                 | 62    | nM    |
| CHEMBL70719  | <chem>CCN1c2cc(Cl)c(Cl)cc2N(C)C(=O)c3ccnc13</chem>                       | 62    | nM    |
| CHEMBL176972 | <chem>CCc1cc(CCc2oc3cccc(Cl)c3n2)c(O)nc1C</chem>                         | 62    | nM    |
| CHEMBL300608 | <chem>CN1C(=O)c2cc(O)ccc2Oc3cc(C)cc(C)c13</chem>                         | 63    | nM    |
| CHEMBL372241 | <chem>CCN1c2ncccc2N(C)C(=O)c3cc(CCOc4ccc5c(cccc5c4)C(=O)O)cnc13</chem>   | 63    | nM    |
| CHEMBL309462 | <chem>Clc1ccc2NC(=O)NC(C#Cc3ccnc3)(C4CC4)c2c1</chem>                     | 64.5  | nM    |
| CHEMBL82856  | <chem>CCc1cc(CCc2cc(CC)c(C)nc2OC)c(O)nc1C</chem>                         | 65    | nM    |
| CHEMBL339090 | <chem>CCc1cc(NCc2oc3c(Cl)cccc3n2)c(O)nc1C</chem>                         | 65    | nM    |
| CHEMBL60545  | <chem>Fe1ccc2NC(=O)N[C@@](C#Cc3cccn3)(c2c1F)C(F)(F)F</chem>              | 68    | nM    |
| CHEMBL15411  | <chem>Cc1cc(C)c2NC(=O)c3ccnc3N(C4CC4)c2n1</chem>                         | 70    | nM    |
| CHEMBL66947  | <chem>COc1c(Cl)ccc2NC(=O)NC(C#CC3CC3)(c12)C(F)(F)F</chem>                | 70    | nM    |
| CHEMBL85574  | <chem>CCc1cc(NCc2nc(C)c(C)cc2OC)c(O)nc1C</chem>                          | 70    | nM    |
| CHEMBL315290 | <chem>CCc1cc(NCc2nc(CC)c(C)cc2OC)c(O)nc1C</chem>                         | 70    | nM    |
| CHEMBL99624  | <chem>CCN1c2nc(Cl)ccc2N(C)C(=O)c3cc(COc4cncnc4)cnc13</chem>              | 70    | nM    |
| CHEMBL103808 | <chem>CCN1c2ncc(C[S+][O-])c3ccccc3)cc2C(=O)N(C)c4ccc(Cl)nc14</chem>      | 70    | nM    |
| CHEMBL330180 | <chem>CCN1c2ncc(CSc3[nH]cnc4nnc34)cc2C(=O)N(C)c5ccc(Cl)nc15</chem>       | 70    | nM    |
| CHEMBL436200 | <chem>CCc1cc(NCc2oc3c(F)ccc(F)c3n2)c(O)nc1C</chem>                       | 70    | nM    |
| CHEMBL135804 | <chem>Cn1cccc1CC\N=C(/S)\Nc2ccc(en2)C#N</chem>                           | 70    | nM    |
| CHEMBL145322 | <chem>CCN1c2nc(ccc2N(C)C(=O)c3ccnc13)N(C)C</chem>                        | 70    | nM    |
| CHEMBL144035 | <chem>CCN1c2nc(ccc2N(C)C(=O)c3ccnc13)c4ccc(O)cc4</chem>                  | 70    | nM    |
| CHEMBL343883 | <chem>CCN1c2nc(ccc2N(C)C(=O)c3ccnc13)c4cccc(N)c4</chem>                  | 70    | nM    |
| CHEMBL357221 | <chem>CCN1c2nc(ccc2N(C)C(=O)c3ccnc13)c4ccc[nH]4</chem>                   | 70    | nM    |
| CHEMBL156340 | <chem>Cc1c(O)nc(SC2CCCC2)nc1Cc3c(F)cccc3F</chem>                         | 70    | nM    |
| CHEMBL173790 | <chem>Fe1cccc(F)c1CC2=CC(=O)NC(=N2)NC3CCCC3</chem>                       | 70    | nM    |
| CHEMBL236161 | <chem>CC(C1=C(C)C(=O)NC(=N1)SC2CCCC2)c3c(F)cccc3F</chem>                 | 70.71 | nM    |
| CHEMBL293332 | <chem>CCN1C(=O)c2cc(N)enc2Oc3cc(C)c(C)cc13</chem>                        | 71    | nM    |
| CHEMBL299334 | <chem>CSCCN1C(=O)c2cccc2Oc3nc(Cl)ccc13</chem>                            | 72    | nM    |
| CHEMBL293037 | <chem>FC(F)(F)[C@]1(NC(=O)Nc2cccc(Cl)c12)C#CC3CC3</chem>                 | 72    | nM    |
| CHEMBL84217  | <chem>Cc1ccc(cc1)S(=O)(=O)c2c([nH]c3ccc(Cl)cc23)C(=O)N</chem>            | 72    | nM    |
| CHEMBL300087 | <chem>CCOC(=O)N1c2cccc2NC(=O)C1(C#CC3CC3)C(F)(F)F</chem>                 | 72.87 | nM    |
| CHEMBL62039  | <chem>Fe1ccc2NC(=O)N[C@@](C#CC3CC3)(c2c1F)C(F)(F)F</chem>                | 74    | nM    |
| CHEMBL292711 | <chem>CCC#C[C@]1(NC(=O)Nc2ccc(F)c(F)c12)C(F)(F)F</chem>                  | 74    | nM    |
| CHEMBL105859 | <chem>COC(=O)CCC\C=C(\c1ccc(OC)c(OC)c1)/c2cc(C)c(OC)c(c2)C(=O)OC</chem>  | 74    | nM    |
| CHEMBL64521  | <chem>CC(C)C#C[C@]1(NC(=O)Nc2ccc(F)c(Cl)c12)C(F)(F)F</chem>              | 78    | nM    |
| CHEMBL107180 | <chem>CCc1c(O)nc(SCC(=O)c2ccc(F)cc2)nc1Cc3cccc4cccc34</chem>             | 78    | nM    |
| CHEMBL324237 | <chem>CC(C)c1c(O)nc(SCC(=O)c2ccc(F)cc2)nc1Cc3cccc4cccc34</chem>          | 78    | nM    |
| CHEMBL417394 | <chem>Fe1ccc2NC(=O)N[C@@](C#Cc3cccn3)(c2c1Cl)C(F)(F)F</chem>             | 80    | nM    |
| CHEMBL82630  | <chem>Clc1cccc2C(=O)N3CCSC3(c4cccc4)c12</chem>                           | 80    | nM    |
| CHEMBL309899 | <chem>CC1=C(Cc2c(F)cccc2F)N=C(NC1=O)SC3CCCC3</chem>                      | 80    | nM    |
| CHEMBL312874 | <chem>Fe1cccc(F)c1CC2=CC(=O)NC(=N2)SC3CCCC3</chem>                       | 80    | nM    |
| CHEMBL313998 | <chem>COc1cccc(c1)C(=O)CC\N=C(/S)\Nc2ccc(Br)cn2</chem>                   | 80    | nM    |
| CHEMBL318952 | <chem>CCN1c2nc(Cl)ccc2N(C)C(=O)c3cc(CCc4cccc(c4)N=[N+]=[N-])cnc13</chem> | 80    | nM    |
| CHEMBL321544 | <chem>CCN1c2nc(Cl)ccc2N(C)C(=O)c3cc(CCc4cncnc4)cnc13</chem>              | 80    | nM    |
| CHEMBL103593 | <chem>CCN1c2ncccc2N(C)C(=O)c3cc(CCc4cccc4N)enc13</chem>                  | 80    | nM    |
| CHEMBL421210 | <chem>CCN1c2ncccc2N(C)C(=O)c3cc(CCc4ccc5cccc5c4)cnc13</chem>             | 80    | nM    |



|               |                                                                                                     |     |    |
|---------------|-----------------------------------------------------------------------------------------------------|-----|----|
| CHEMBL320663  | CCN1c2nc(Cl)ccc2N(C)C(=O)c3cc(CNc4ccccc4)cnc13                                                      | 80  | nM |
| CHEMBL125446  | Cc1nc(CCCCCC(=O)c2ccccc2)n3nc(ccc13)n4cccc4                                                         | 80  | nM |
| CHEMBL445136  | CCNc1ccc(OCc2ccnc3N(C4CC4)c5ncccc5C(=O)Nc23)cc1                                                     | 80  | nM |
| CHEMBL254207  | Cc1ccccc1CCNC(=S)Nc2nccs2                                                                           | 80  | nM |
| CHEMBL1203237 | Cl.CSc1ccc2c(C)nc(CCCCCC(=O)c3ccccc3)n2n1                                                           | 80  | nM |
| CHEMBL173589  | CCCc1cc(CCc2oc3ccccc3n2)c(O)nc1C                                                                    | 83  | nM |
| CHEMBL317992  | Fe1ccc2NC(=O)OC(C#CC3CC3)(c2c1F)C(F)(F)F                                                            | 84  | nM |
| CHEMBL339067  | Nc1cc(Cl)nc(SCc2cc3OCOc3cc2Cl)n1                                                                    | 85  | nM |
| CHEMBL176631  | CCc1cc(OCc2oc3c(Cl)ccc(Cl)c3n2)c(O)nc1C                                                             | 88  | nM |
| CHEMBL292188  | CCN1C(=S)c2ccnc2Oc3cc(C)cc(C)c13                                                                    | 90  | nM |
| CHEMBL303446  | FC(F)(F)C12NC(=O)Nc3ccc(Cl)c(OC(=C1)C4CC4)c23                                                       | 90  | nM |
| CHEMBL101501  | CCN1c2ncccc2N(C)C(=O)c3cc(CCC(=O)OC)cnc13                                                           | 90  | nM |
| CHEMBL318982  | CCN1c2nc(I)ccc2N(C)C(=O)c3cc(CCc4ccncc4)cnc13                                                       | 90  | nM |
| CHEMBL103946  | CCN1c2nc(Cl)ccc2N(C)C(=O)c3cc(COc4cccc(c4)C(=O)O)cnc13                                              | 90  | nM |
| CHEMBL122343  | CN(C1CCN(CC1)C(=O)c2cc3cc(NS(=O)(=O)C)ccc3[nH]2)c4ncccc4N<br>C5CC5                                  | 90  | nM |
| CHEMBL135179  | Cn1ccccc1CC\N=C(/S)\Nc2ccc(Cl)cn2                                                                   | 90  | nM |
| CHEMBL422659  | CCN1c2ncccc2C(=O)N(C)c3ccc(nc13)n4cccc4                                                             | 90  | nM |
| CHEMBL144820  | CN1C(=O)c2ccnc2N(C3CC3)c4nc(Cl)ccc14                                                                | 90  | nM |
| CHEMBL358947  | CCN1c2nc(CC)cc(C)c2NC(=O)c3ccnc13                                                                   | 90  | nM |
| CHEMBL343625  | CCN1c2ncccc2C(=O)Nc3c(C)cc(NCCCO)nc13                                                               | 90  | nM |
| CHEMBL341847  | CCN1c2nc(NCCO)cc(C)c2NC(=O)c3ccnc13                                                                 | 90  | nM |
| CHEMBL156255  | Oc1cc(Cc2c(F)cccc2F)nc(SC3CCCC3)n1                                                                  | 90  | nM |
| CHEMBL156637  | CC(C)CSc1nc(O)c(C)c(Cc2c(F)cccc2F)n1                                                                | 90  | nM |
| CHEMBL160869  | CCCCSc1nc(O)c(C)c(Cc2c(F)cccc2F)n1                                                                  | 90  | nM |
| CHEMBL191910  | Ic1ccc(NC(=S)OCCN2C(=O)c3ccccc3C2=O)cc1                                                             | 90  | nM |
| CHEMBL400685  | COc1ccccc(OC)c1CCNC(=S)Nc2nccs2                                                                     | 90  | nM |
| CHEMBL62179   | CC(C)C#C[C@@]1(NC(=O)Nc2ccc(F)c(F)c12)C(F)(F)F                                                      | 91  | nM |
| CHEMBL312896  | CCc1cc(CNc2cc(CC)c(C)nc2O)c(O)nc1C                                                                  | 91  | nM |
| CHEMBL125299  | CCc1cc(NCc2oc3c(F)cccc3n2)c(O)nc1C                                                                  | 92  | nM |
| CHEMBL37842   | CCN1c2nccc(Cl)c2NC(=O)c3ccnc13                                                                      | 95  | nM |
| CHEMBL193125  | CCN1c2ncccc2N(C)C(=O)c3cc(CCOc4ccc(cc4)C(=O)O)cnc13                                                 | 95  | nM |
| CHEMBL174364  | Cc1cc(CCc2oc3c(Cl)ccc(Cl)c3n2)c(O)nc1C<br>CCN(C1CCN(CC1)C(=O)c2cc3cc(NS(=O)(=O)C)ccc3[nH]2)c4ncccc4 | 97  | nM |
| CHEMBL336807  | CC                                                                                                  | 98  | nM |
| CHEMBL57733   | CCc1c(C)nc(O)c(N)c1Cc2cc(C)cc(C)c2                                                                  | 100 | nM |
| CHEMBL99793   | CCN1c2nc(Cl)ccc2N(C)C(=O)c3cc(COc4cccc(OC)c4)cnc13                                                  | 100 | nM |
| CHEMBL323072  | CCN1c2ncc(CS(=O)(=O)c3ccccc3)cc2C(=O)N(C)c4ccc(Cl)nc14                                              | 100 | nM |
| CHEMBL433172  | CCN1c2ncc(COc3cc[n+]( [O-])c(C)c3)cc2C(=O)N(C)c4ccc(Cl)nc14                                         | 100 | nM |
| CHEMBL318635  | CCN1c2ncccc2N(C)C(=O)c3cc(CCc4ccc(C)cc4)cnc13                                                       | 100 | nM |
| CHEMBL100903  | CCN1c2ncc(COc3ccccc3O)cc2C(=O)N(C)c4ccc(Cl)nc14                                                     | 100 | nM |
| CHEMBL434441  | Cc1cncn1c2ccc3c(C)nc(CCCCCC(=O)c4ccccc4)n3n2                                                        | 100 | nM |
| CHEMBL125532  | Cc1nc(CCCCCC(=O)c2ccccc2)n3nc(ccc13)n4cncn4                                                         | 100 | nM |
| CHEMBL128931  | CCc1c(C)nc(O)c(N)c1C(=O)c2cc(C)cc(C)c2                                                              | 100 | nM |
| CHEMBL140532  | Cc1cc(C)cc(Sc2c(C)enc(O)c2N)c1                                                                      | 100 | nM |
| CHEMBL357183  | CCN1c2ncccc2C(=O)N(C)c3ccc(nc13)c4nccs4                                                             | 100 | nM |
| CHEMBL146550  | CCN1c2ncccc2C(=O)N(C)c3ccc(nc13)c4ccsc4                                                             | 100 | nM |
| CHEMBL144653  | CCN1c2nc(ccc2N(C)C(=O)c3ccnc13)c4ccccc(O)c4                                                         | 100 | nM |
| CHEMBL359195  | Nc1ccc(OCc2ccnc3N(C4CC4)c5ncccc5C(=O)Nc23)cc1                                                       | 100 | nM |
| CHEMBL154913  | CCC(C)Sc1nc(O)cc(Cc2c(Cl)cccc2Cl)n1                                                                 | 100 | nM |
| CHEMBL240416  | COc1ccc(OC)c(CCNC(=S)Nc2ccc(Br)cn2)c1                                                               | 100 | nM |

|              |                                                                                                              |        |    |
|--------------|--------------------------------------------------------------------------------------------------------------|--------|----|
| CHEMBL254628 | Cc1csc(NC(=S)NCCc2ccccc2)n1                                                                                  | 100    | nM |
| CHEMBL98159  | CCc1cc(CCc2oc3ccccc3c2)c(O)nc1C                                                                              | 100.05 | nM |
| CHEMBL305345 | Fe1c(Cl)ccc2NC(=O)N[C@@](C#CC3CC3)(c12)C(F)(F)F                                                              | 102    | nM |
| CHEMBL124430 | CCc1cc(N(C)Cc2oc3c(C)ccc(C)c3n2)c(O)nc1C                                                                     | 103    | nM |
| CHEMBL40562  | COc1ccc(C(=O)C)c(F)c1CCNC(=O)Nc2ccc(Cl)cn2                                                                   | 104.4  | nM |
| CHEMBL104658 | CCOC(C#CC1CC1)(c2cc(CC)c(C)nc2O)C(F)(F)F                                                                     | 105    | nM |
| CHEMBL122293 | CCc1cc(NCc2oc3c(Cl)ccc(F)c3n2)c(O)nc1C                                                                       | 105    | nM |
| CHEMBL29171  | FC(F)(F)C1(OCC(=O)Nc2ccc(Cl)cc12)\C=C\C3CC3                                                                  | 108    | nM |
| CHEMBL49316  | CC(C)OC(=O)N1c2ccccc2NC(=O)C1(C#CC3CC3)C(F)(F)F                                                              | 108    | nM |
| CHEMBL37343  | CCN1c2ncccc2N(C)C(=O)c3ccnc13                                                                                | 108.17 | nM |
| CHEMBL48628  | COc1ccc2NC(=O)C(C#CC3CC3)(N(CC4CC4)c2c1)C(F)(F)F<br>CC(C)Nc1ccnc1N2CCN(CC2)C(=O)c3cc4cc(NS(=O)(=O)C)ccc4[nH] | 109    | nM |
| CHEMBL593    | 3                                                                                                            | 109.54 | nM |
| CHEMBL288336 | CCN1c2ncccc2C(=O)N(C)c3ccc(Cl)nc13                                                                           | 109.54 | nM |
| CHEMBL39792  | CCN1c2ncccc2C(=O)N(C)c3c(CC)ccnc13                                                                           | 110    | nM |
| CHEMBL293894 | CCC#C[C@@]1(NC(=O)Nc2ccc(Cl)cc12)C(F)(F)F                                                                    | 110    | nM |
| CHEMBL102163 | CCN1c2ncc(CCc3cccc(C)c3)cc2C(=O)N(C)c4ccc(Cl)nc14                                                            | 110    | nM |
| CHEMBL319277 | CCN1c2nc(Cl)ccc2N(C)C(=O)c3cc(COc4ccccc4)enc13                                                               | 110    | nM |
| CHEMBL319032 | CCN1c2ncccc2N(C)C(=O)c3cc(CCc4cccc(C)c4)enc13                                                                | 110    | nM |
| CHEMBL124786 | CCc1cc(NCc2oc3cccc(F)c3n2)c(O)nc1C                                                                           | 110    | nM |
| CHEMBL145273 | CCN1c2nc(O)cc(COCc3ccccc3)c2NC(=O)c4ccnc14                                                                   | 110    | nM |
| CHEMBL356998 | CCN1c2ncccc2C(=O)N(C)c3ccc(nc13)c4ocnc4                                                                      | 110    | nM |
| CHEMBL144652 | CCN1c2ncccc2C(=O)N(C)c3ccc(nc13)c4occc4                                                                      | 110    | nM |
| CHEMBL144061 | C=Cc1ccnc2N(C3CC3)c4ncccc4C(=O)Nc12                                                                          | 110    | nM |
| CHEMBL420519 | Cc1nc(O)c(NCc2oc3c(Cl)ccc(Cl)c3n2)c4Cc14                                                                     | 113    | nM |
| CHEMBL317130 | CCN1c2ncccc2N(C)C(=O)c3cc(N)enc13                                                                            | 114.02 | nM |
| CHEMBL126634 | COc1cc(NCc2oc3c(Cl)ccc(Cl)c3n2)c(O)nc1C                                                                      | 115    | nM |
| CHEMBL330597 | CCN1c2ncccc2N(C)C(=O)c3cc(CCCc4ccccc4)enc13                                                                  | 120    | nM |
| CHEMBL318720 | CCN1c2ncccc2N(C)C(=O)c3cc(Cc4ccccc4)enc13                                                                    | 120    | nM |
| CHEMBL100056 | CCN1c2ncc(CCc3cccc(N)c3)cc2C(=O)N(C)c4ccc(Cl)nc14                                                            | 120    | nM |
| CHEMBL102960 | CCN1c2ncccc2N(C)C(=O)c3cc(CCc4cccc(F)c4)enc13<br>CCN1c2ncc(COc3cc[n+])([O-                                   | 120    | nM |
| CHEMBL413252 | )]c(c3)C(F)(F)F)cc2C(=O)N(C)c4ccc(Cl)nc14                                                                    | 120    | nM |
| CHEMBL144642 | O=C1Nc2c(COc3ccccc3)ccnc2N(C4CC4)c5ncccc15                                                                   | 120    | nM |
| CHEMBL143107 | COc1ccc2N(C)C(=O)c3ccnc3N(C4CC4)c2n1                                                                         | 120    | nM |
| CHEMBL297897 | CCOC(=O)N1c2cc(F)ccc2NC(=O)C1(C#CC3CC3)C(F)(F)F                                                              | 121    | nM |
| CHEMBL69005  | FC(F)(F)C12NC(=O)Nc3ccc(Cl)c(OC(=C1)c4ccnc4)c23                                                              | 122    | nM |
| CHEMBL99018  | CCc1cc(NCc2oc3cccc(C)c3n2)c(O)nc1C                                                                           | 122.47 | nM |
| CHEMBL48376  | COc1ccc2NC(=O)C(C#CC3CC3)(N(CC=C)c2c1)C(F)(F)F                                                               | 123    | nM |
| CHEMBL295606 | Fe1ccc2NC(=O)C(C#CC3CC3)(N(CC=C)c2c1)C(F)(F)F                                                                | 124    | nM |
| CHEMBL64467  | COc1ccc2NC(=O)N[C@@](C#CC3CC3)(c2c1)C(F)(F)F                                                                 | 124    | nM |
| CHEMBL430601 | Fe1ccc2NC(=O)N[C@@](C#Cc3cccn3)(c2c1)C(F)(F)F                                                                | 126    | nM |
| CHEMBL299394 | CCOC(=O)N1c2cc(Cl)ccc2NC(=O)C1(C#CC3CC3)C(F)(F)F                                                             | 127    | nM |
| CHEMBL287650 | CC1OC(\C=C\C2CC2)(c3cc(F)ccc3NC1=O)C(F)(F)F<br>FC(F)(F)[C@@]1(C#CC2CC2)[C@@H](OCc3ccnc3)C(=O)Nc4ccc(C        | 129    | nM |
| CHEMBL57113  | l)cc14                                                                                                       | 129    | nM |
| CHEMBL302622 | FC(F)(F)[C@]1(NC(=O)Nc2ccc(Cl)cc12)C#Cc3cccn3                                                                | 129    | nM |
| CHEMBL107693 | CCCCOC(C#CC1CC1)(c2cc(CC)c(C)nc2O)C(F)(F)F                                                                   | 129    | nM |
| CHEMBL431936 | CC(C)OC(=O)N1c2cc(F)ccc2NC(=O)C1(C#CC3CC3)C(F)(F)F                                                           | 130    | nM |
| CHEMBL53451  | CCCN1C(=O)c2cc(N)ccc2Oc3cc(C)ccc13                                                                           | 130    | nM |
| CHEMBL293736 | FC(F)(F)[C@]1(CC(=O)Nc2ccc(Cl)cc12)C#CC3CC3                                                                  | 130    | nM |

|               |                                                                           |        |    |
|---------------|---------------------------------------------------------------------------|--------|----|
| CHEMBL312397  | CCN1c2neccc2C(=O)N(C)c3ccc(nc13)c4c[nH]c5ccncc45                          | 130    | nM |
| CHEMBL310306  | Clc1ccc2NC(=O)NC(C#Cc3ncccn3)(C4CC4)c2c1                                  | 130    | nM |
| CHEMBL101944  | CCN1c2neccc2N(C)C(=O)c3cc(CCc4ccnc4)cnc13                                 | 130    | nM |
| CHEMBL101979  | CCN1c2nc(Cl)ccc2N(C)C(=O)c3cc(COc4cccc(c4)C(=O)N)cnc13                    | 130    | nM |
| CHEMBL99845   | CCN1c2ncc(COc3cccc(O)c3)cc2C(=O)N(C)c4ccc(Cl)nc14                         | 130    | nM |
| CHEMBL126107  | CCCNc1ccnc1N(CC)C2CCN(CC2)C(=O)c3cc4cc(NS(=O)(=O)C)ccc4<br>[nH]3          | 130    | nM |
| CHEMBL132770  | CCCN(C1CCN(CC1)C(=O)c2cc3cc(NS(=O)(=O)C)ccc3[nH]2)c4ncccc<br>4CC          | 130    | nM |
| CHEMBL356779  | CCN1c2neccc2C(=O)N(C)c3ccc(nc13)c4ncc[nH]4                                | 130    | nM |
| CHEMBL198276  | COC(=O)c1cc(cc(C)c1OC)\C(=C/CCN2CCOC2=O)\c3cc(F)cc(c3)C(F)(<br>F)F        | 130    | nM |
| CHEMBL254413  | [O-][N+](=O)c1cccc1CCNC(=S)Nc2nccs2                                       | 130    | nM |
| CHEMBL79403   | C[C@@H]1Cn2c(S)nc3cccc(CN1CC=C(C)C)c23                                    | 130.77 | nM |
| CHEMBL97653   | COc1ccc2NC(=O)OC(C#CC3CC3)(c2c1)C(F)(F)F                                  | 131    | nM |
| CHEMBL299495  | CCN1C(=O)c2ccnc2Oc3cc(C)cc(N)c13                                          | 132    | nM |
| CHEMBL432763  | Cc1ccc2NC(=O)OC(C#CC3CC3)(c2c1)C(F)(F)F                                   | 133    | nM |
| CHEMBL133779  | Oc1ccc(F)c(C2CC2NC(=O)Nc3ccc(Cl)cn3)c1Cl                                  | 135    | nM |
| CHEMBL58596   | CC(C)C#CC1(NS(=O)(=O)Nc2ccc(Cl)cc12)C(C)C                                 | 137    | nM |
| CHEMBL305996  | COc1c(Cl)ccc2NC(=O)NC(C#Cc3ccnc3)(c12)C(F)(F)F                            | 139    | nM |
| CHEMBL87303   | O=C1N2CCSC2(c3cccc13)c4cccc5cccc45                                        | 139.64 | nM |
| CHEMBL317356  | Brc1ccc(NC(=S)NCCc2ccccc2)nc1                                             | 139.64 | nM |
| CHEMBL73015   | CCCCN1c2ccccc2N(C)C(=O)c3cccnc13                                          | 140    | nM |
| CHEMBL74690   | CCN1c2cc(ccc2N(C)C(=O)c3cccnc13)N=[N+]=[N-]                               | 140    | nM |
| CHEMBL327938  | CCN1c2nc(Cl)ccc2N(C)C(=O)c3cc(CCc4cccc(NS(=O)(=O)C)c4)cnc13               | 140    | nM |
| CHEMBL262633  | CCNc1ccnc1N(CC)C2CCN(CC2)C(=O)c3cc4cc(NC(=O)N5CCN(C)C<br>C5)ccc4[nH]3     | 140    | nM |
| CHEMBL331911  | CCN(C1CCN(CC1)C(=O)c2cc3cc(NC(=O)N4CCN(C)CC4)ccc3[nH]2)<br>c5ncccc5NC(C)C | 140    | nM |
| CHEMBL132491  | COc1ccnc1N(C)C2CCN(CC2)C(=O)c3cc4cc(NS(=O)(=O)C)ccc4[nH]<br>]3            | 140    | nM |
| CHEMBL134106  | CCN(C1CCN(CC1)C(=O)c2cc3cc(NS(=O)(=O)C)ccc3[nH]2)c4ncccc4<br>COC          | 140    | nM |
| CHEMBL145193  | CCN1c2nc(ccc2N(C)C(=O)c3cccnc13)c4cccs4                                   | 140    | nM |
| CHEMBL358292  | O=C1Nc2c(Cc3ccccc3)cn2N(C4CC4)c5ncccc15                                   | 140    | nM |
| CHEMBL344288  | CCN1c2nc(ccc2N(C)C(=O)c3cccnc13)C#C                                       | 140    | nM |
| CHEMBL2114369 | C[C@@@H]1O[C@@](C#CC2CC2)(c3cc(Cl)ccc3NC1=O)C(F)(F)F                      | 142.89 | nM |
| CHEMBL304028  | Fe1ccc2NC(=O)N[C@@](C#Cc3ccccc3)(c2c1)C(F)(F)F                            | 143    | nM |
| CHEMBL304938  | COc1c(Cl)ccc2NC(=O)NC(C#Cc3ccccc3)(c12)C(F)(F)F                           | 144    | nM |
| CHEMBL293077  | CCN1C(=O)c2cc(N)ccc2Oc3ccccc13                                            | 145    | nM |
| CHEMBL299978  | FC(F)(F)C1(C#CC2CC2)N(C(=O)OCC=C)c3ccccc3NC1=O                            | 147    | nM |
| CHEMBL101938  | CCN1c2nc(Cl)ccc2N(C)C(=O)c3cc(CCc4ccnc(c4)C(=O)OC)cnc13                   | 150    | nM |
| CHEMBL125715  | CCCN(C1CCN(CC1)C(=O)c2cc3cc(NS(=O)(=O)C)ccc3[nH]2)c4ncccc<br>4NCC         | 150    | nM |
| CHEMBL124526  | CCc1cc(NCc2oc3cccc(Cl)c3n2)c(O)nc1C                                       | 150    | nM |
| CHEMBL135662  | Cc1cc2nn(CC\N=C(/S)\Nc3ccc(Br)cn3)nc2cc1C                                 | 150    | nM |
| CHEMBL435030  | CCN1c2nc(cc(C)c2NC(=O)c3cccnc13)N4CCSCC4                                  | 150    | nM |
| CHEMBL355918  | CN1C(=O)c2ccnc2N(C3CC3)c4nc(ccc14)c5ccncc5                                | 150    | nM |
| CHEMBL145049  | O=C1Nc2c(CNc3ccccc3)cn2N(C4CC4)c5ncccc15                                  | 150    | nM |
| CHEMBL144290  | CCN1c2neccc2C(=O)N(C)c3ccc(nc13)c4cccc(OC)c4                              | 150    | nM |
| CHEMBL253995  | Fe1cccc(CCNC(=S)Nc2nccs2)c1                                               | 150    | nM |
| CHEMBL400733  | COc1cccc(CCNC(=S)Nc2nccs2)c1                                              | 150    | nM |

|               |                                                                             |        |    |
|---------------|-----------------------------------------------------------------------------|--------|----|
| CHEMBL2114381 | CCN1c2cc(C)c(C)nc2N(C)C(=O)c3cc(N)cnc13                                     | 150    | nM |
| CHEMBL30752   | CCC1OC(\C=C\C2CC2)(c3cc(F)ccc3NC1=O)C(F)(F)F                                | 151    | nM |
| CHEMBL42906   | CCN1c2ncccc2c3ncc(C)n3c4ccc(OC)nc14                                         | 156    | nM |
| CHEMBL297851  | CC(C)OC(=O)N1c2cc(Cl)ccc2NC(=O)C1(C#CC3CC3)C(F)(F)F                         | 160    | nM |
| CHEMBL295893  | CC(C)C(I)N1c2ccccc2NC(=O)C1(C#CC3CC3)C(F)(F)F                               | 160    | nM |
| CHEMBL327744  | CCN1c2nc(Cl)ccc2N(C)C(=O)c3cc(Cc4ccnc(CO)c4)cnc13                           | 160    | nM |
| CHEMBL330602  | CCN1c2ncc(CCc3ccc(N)cc3)cc2C(=O)N(C)c4ccc(Cl)nc14                           | 160    | nM |
| CHEMBL125203  | CN(C1CCN(CC1)C(=O)c2cc3cc(NS(=O)(=O)C)ccc3[nH]2)c4ncccc4N<br>C5(C)CC5       | 160    | nM |
| CHEMBL116350  | Brc1ccc(NC(=S)NCCc2c[nH]c3ccccc23)nc1                                       | 164.32 | nM |
| CHEMBL59140   | CCCN1C(=O)c2cc(N)ccc2Oc3cc(C)c(C)cc13                                       | 165    | nM |
| CHEMBL377310  | Cc1cc(C)c(c(C)c1)n2nnnc2SCC(=O)Nc3ccc(cc3C)[N+](=O)[O-]                     | 165    | nM |
| CHEMBL59917   | FC(F)(F)[C@]1(NC(=O)Nc2ccc(Cl)c(Cl)c12)C#CC3CC3                             | 166    | nM |
| CHEMBL50664   | CC(=C)OC(=O)N1c2ccccc2NC(=O)C1(C#CC3CC3)C(F)(F)F                            | 169    | nM |
| CHEMBL305965  | CCN1c2ccc(Cl)cc2N(C)C(=O)c3ccnc13                                           | 170    | nM |
| CHEMBL316922  | CCN1c2nc(Cl)ccc2N(C)C(=O)c3cc(COe4cccc(c4)[N+](=O)[O-])cnc13                | 170    | nM |
| CHEMBL103399  | CCN1c2ncc(COe3ccccc3F)cc2C(=O)N(C)c4ccc(Cl)nc14                             | 170    | nM |
| CHEMBL331790  | CC(C)Nc1ccnc1N(C)C2CCN(CC2)C(=O)c3cc4ccc(CO)cc4[nH]3                        | 170    | nM |
| CHEMBL132122  | COe1ccc2N=C(S)C(CSC)N(C(=O)OC(C)C)c2c1                                      | 170    | nM |
| CHEMBL426396  | Cc1cc(CCc2oc3ccccc3n2)c(O)nc1C                                              | 170    | nM |
| CHEMBL177256  | CCc1cc(CCc2oc3cc(C)ccc3n2)c(O)nc1C                                          | 172    | nM |
| CHEMBL57      | Cc1ccnc2N(C3CC3)c4ncccc4C(=O)Nc12                                           | 172.92 | nM |
| CHEMBL281230  | CC1OC(\C=C\C2CC2)(c3c(F)c(F)ccc3NC1=O)C(F)(F)F                              | 173    | nM |
| CHEMBL177191  | CCc1cnc(O)c(CCc2oc3ccccc3n2)c1                                              | 177    | nM |
| CHEMBL35033   | CCOCN1C(=O)NC(=O)C(=C1Cc2ccccc2)C(C)C                                       | 178.89 | nM |
| CHEMBL301370  | CC[C@@H]1N(C(=O)OC(C)C)c2cc(F)ccc2NC1=O                                     | 179    | nM |
| CHEMBL50550   | FC(F)(F)C1(C#CC2CC2)N(CC3CC3)c4ccccc4NC1=O                                  | 179.25 | nM |
| CHEMBL301022  | CN1C(=O)c2cc(N)ccc2Oc3ccccc13                                               | 180    | nM |
| CHEMBL539427  | Brc1ccc(NC(=N)N[C@@H]2C[C@@H]2c3ccccc3)nc1                                  | 180    | nM |
| CHEMBL110625  | Cc1c(O)nc(SCC(=O)c2ccc(F)cc2)nc1Cc3cccc4ccccc34                             | 180    | nM |
| CHEMBL125437  | CNC(=O)Nc1ccc2[nH]c(cc2c1)C(=O)N3CCC(CC3)N(C)c4ncccc4NC(C)C                 | 180    | nM |
| CHEMBL127564  | CCc1cc(NCc2oc3ccccc(OC)c3n2)c(O)nc1C                                        | 180    | nM |
| CHEMBL145736  | CN1C(=O)c2ccnc2N(C3CC3)c4nc(ccc14)c5ccnc5                                   | 180    | nM |
| CHEMBL144773  | CCN1c2nc(\C=C\C(=O)OC)ccc2N(C)C(=O)c3ccnc13                                 | 180    | nM |
| CHEMBL254237  | CCOc1ccc(OCC)c(CCN(C)=S)Nc2ccc(Br)cn2)c1                                    | 180    | nM |
| CHEMBL302861  | Fc1ccc2NC(=O)N[C@@](C#Cc3ccccc3)(c2c1F)C(F)(F)F                             | 181    | nM |
| CHEMBL131518  | CCOC(=O)CCCC=C(c1cc(C)c(OC)c(c1)C(=O)OC)c2cc(C)c(OC)c(c2)C(=O)OC            | 181    | nM |
| CHEMBL49733   | CC(=C)OC(=O)N1c2cc(F)ccc2NC(=O)C1(C#CC3CC3)C(F)(F)F                         | 183    | nM |
| CHEMBL321174  | CCOC(C#CC1CC1)(c2cc(CC)c(C)nc2O)C(F)(F)F                                    | 183    | nM |
| CHEMBL284065  | CCC1OC(\C=C\C2CC2)(c3cc(Cl)ccc3NC1=O)C(F)(F)F                               | 185    | nM |
| CHEMBL105400  | CCc1cc(c(O)nc1C)C(OCC2CC2)(C#CC3CC3)C(F)(F)F                                | 188    | nM |
| CHEMBL71311   | CCN1c2ccc(C)cc2N(C)C(=O)c3ccnc13                                            | 190    | nM |
| CHEMBL94725   | Fc1ccc2NC(=O)OC(C#CC3CC3)(c2c1)C(F)(F)F                                     | 190    | nM |
| CHEMBL441072  | CCN1c2nc(Cl)ccc2N(C)C(=O)c3cc(COe4ccnc4)cnc13                               | 190    | nM |
| CHEMBL102056  | CCN1c2ncccc2N(C)C(=O)c3cc(CCc4ccccc4)cnc13                                  | 190    | nM |
| CHEMBL339279  | CCCN(C1CCN(CC1)C(=O)c2cc3cc(NC(=O)N4CCN(C)CC4)ccc3[nH]2)<br>)c5ncccc5NC(C)C | 190    | nM |
| CHEMBL124594  | CSc1cc(NCc2oc3ccccc3n2)c(O)nc1C                                             | 190    | nM |
| CHEMBL340381  | Nc1cc(Cl)nc(SC\C=C\c2ccccc2)n1                                              | 190    | nM |

|               |                                                         |        |    |
|---------------|---------------------------------------------------------|--------|----|
| CHEMBL147800  | Oc1ccccc1Cc2ccnc3N(C4CC4)c5ncccc5C(=O)Nc23              | 190    | nM |
| CHEMBL342068  | CCN1c2nc(NC)ccc2N(C)C(=O)c3ccnc13                       | 190    | nM |
| CHEMBL2115336 | CCN1c2cc(C)c(C)nc2N(C)C(=O)c3ccnc13                     | 190    | nM |
| CHEMBL174311  | CCc1cc(OCc2oc3ccccc3n2)c(O)nc1C                         | 191    | nM |
| CHEMBL31771   | CC1OC(C#CC2CC2)(c3c(F)c(F)ccc3NC1=O)C(F)(F)F            | 193    | nM |
| CHEMBL35434   | C[C@H]1C(Cl)n2c(S)nc3cccc(CN1CC=C(C)C)c23               | 200    | nM |
| CHEMBL41694   | Cc1ccccc1C(OCCn2c(C)nc2[N+](=O)[O-])c3ccccc3            | 200    | nM |
| CHEMBL70483   | CC(C)N1c2ccccc2N(C)C(=O)c3ccnc13                        | 200    | nM |
| CHEMBL311356  | CCN1c2nc(ccc2N(C)C(=O)c3ccnc13)c4c[nH]c5ccc(OC)cc45     | 200    | nM |
| CHEMBL83401   | CSc1nc(O)cc(n1)C(C)c2c(F)cccc2F                         | 200    | nM |
| CHEMBL319762  | CCN1c2ncccc2N(C)C(=O)c3cc(CCc4ccccc4C)nc13              | 200    | nM |
| CHEMBL333128  | CN(C)C(=O)\C=C\CSc1nc(N)cc(Cl)n1                        | 200    | nM |
| CHEMBL338936  | CCC1=C(C)NC(=O)C(=C1Cc2cc(C)cc(C)c2)NC=O                | 200    | nM |
| CHEMBL135235  | C[C@]1(Cl)CC2=C(CCC(=O)C2)[C@H]3CC[C@@]4(C)[C@@H](CC    | 200    | nM |
| CHEMBL358143  | Cc1ccc(Cc2ccnc3N(C4CC4)c5ncccc5C(=O)Nc23)c(O)c1         | 200    | nM |
| CHEMBL148106  | S=C(NCCc1ccccc1)Nc2nc(cs2)C#N                           | 200    | nM |
| CHEMBL145709  | S=C(NCCc1ccccc1)Nc2nccs2                                | 200    | nM |
| CHEMBL147099  | S=C(NCCc1ccccc1)Nc2nc3ccccc3s2                          | 200    | nM |
| CHEMBL345190  | CCCCSc1nc(O)cc(Cc2c(F)cccc2F)n1                         | 200    | nM |
| CHEMBL347823  | CC(C)CSc1nc(O)cc(Cc2c(F)cccc2F)n1                       | 200    | nM |
| CHEMBL157028  | CSc1nc(O)c(C)c(Cc2c(F)cccc2F)n1                         | 200    | nM |
| CHEMBL381286  | Cc1cc(C)c(c(C)c1)n2nnnc2SCC(=O)Nc3cccc(c3)[N+](=O)[O-]  | 200    | nM |
| CHEMBL254415  | CCCOc1cccc(CCNC(=S)Nc2nccs2)c1                          | 200    | nM |
| CHEMBL401167  | COc1ccc(OC)c(CCNC(=S)Nc2nccs2)c1                        | 200    | nM |
| CHEMBL254839  | CC(C)c1esc(NC(=S)NCCc2ccccc2)n1                         | 200    | nM |
| CHEMBL398764  | CCOC(=O)c1esc(NC(=S)NCCc2ccccc2)n1                      | 200    | nM |
| CHEMBL176637  | CCc1cc(c(O)nc1C)S(=O)(=O)Cc2oc3c(Cl)ccc(Cl)c3n2         | 205    | nM |
| CHEMBL294211  | CCCN1C(=O)c2ccccc2Oc3nc(Cl)ccc13                        | 210    | nM |
| CHEMBL318646  | CCN1c2ncccc2N(C)C(=O)c3cc(CCC#N)nc13                    | 210    | nM |
| CHEMBL103437  | CCN1c2ncccc2N(C)C(=O)c3cc(COc4cc[n+](O)cc4)nc13         | 210    | nM |
| CHEMBL101293  | CCN1c2nc(Cl)ccc2N(C)C(=O)c3cc(nc13)N(C)C(=O)c4ccccc4    | 210    | nM |
| CHEMBL99644   | CCN1c2ncc(COc3ccc(O)cc3)cc2C(=O)N(C)c4ccc(Cl)nc14       | 210    | nM |
| CHEMBL43308   | Cc1ccnc2N(C3CC3)c4ncccc4c5ncn5c12                       | 217    | nM |
| CHEMBL291662  | COc1ccc2NC(=O)N[C@@](C#Cc3ccccc3)(c2c1)C(F)(F)F         | 219    | nM |
| CHEMBL84705   | COC(=O)[C@H]1CSC2(N1C(=O)c3ccccc23)c4ccccc4             | 220    | nM |
| CHEMBL125478  | CCN(C1CCN(CC1)C(=O)c2cc3cc(NC(=O)N4CCN(C)CC4)ccc3[nH]2) | 220    | nM |
| CHEMBL342056  | c5ncccc5NC(C)C                                          | 220    | nM |
| CHEMBL342056  | CCN1c2ncccc2C(=O)N(C)c3ccc(nc13)c4occn4                 | 220    | nM |
| CHEMBL132259  | COc1c(CCNC(=O)Nc2ccc(Cl)cn2)c(F)ccc1C(=O)C              | 224    | nM |
| CHEMBL37628   | CCN1c2nccc(C)c2NC(=O)c3ccnc13                           | 229.13 | nM |
| CHEMBL308686  | CCCN1c2ccccc2N(C)C(=O)c3ccnc13                          | 230    | nM |
| CHEMBL308248  | CCN1c2cc(ccc2N(C)C(=O)c3ccnc13)C(F)(F)F                 | 230    | nM |
| CHEMBL101670  | CCN1c2ncc(CCc3ccc(C)cc3)cc2C(=O)N(C)c4ccc(Cl)nc14       | 230    | nM |
| CHEMBL319425  | CCN1c2ncc(COc3cc[n+](O)cc3)cc2C(=O)N(C)c4ccc(Cl)nc14    | 230    | nM |
| CHEMBL436392  | CC(C)Nc1ccnc1N(C2CC2)C3CCN(CC3)C(=O)c4cc5cc(NS(=O)(=O)C | 230    | nM |
| CHEMBL436392  | )ccc5[nH]4                                              | 230    | nM |
| CHEMBL121820  | Cc1nc(CCCCCC(O)c2ccccc2)n3nc(ccc13)n4ccnc4              | 230    | nM |
| CHEMBL359187  | CCN1c2nc(ccc2N(C)C(=O)c3ccnc13)c4ccccc4                 | 230    | nM |
| CHEMBL144378  | CCNc1ccc2N(C)C(=O)c3ccnc3N(CC)c2n1                      | 230    | nM |
| CHEMBL204735  | [O-][N+](=O)c1ccccc1NC(=O)CSc2nnnn2c3ccc(Cl)c(Cl)c3     | 230    | nM |

|               |                                                                       |     |    |
|---------------|-----------------------------------------------------------------------|-----|----|
| CHEMBL129835  | CCOC(=O)CCCC=C(c1cc(Cl)c(OC)c(c1)C(=O)OC)c2cc(Cl)c(OC)c(c2)C(=O)OC    | 233 | nM |
| CHEMBL31285   | FC(F)(F)CC1OC(C#CC2CC2)(c3cc(Cl)ccc3NC1=O)C(F)(F)F                    | 235 | nM |
| CHEMBL316785  | CCc1cc(NCc2oc3ccccc3c2)c(O)nc1C                                       | 235 | nM |
| CHEMBL292790  | COc1ccc2NC(=O)N[C@@](C#Cc3cccn3)(c2c1)C(F)(F)F                        | 237 | nM |
| CHEMBL55391   | CCN1C(=O)c2cc(N)ccc2Oc3ccc(C)cc13                                     | 240 | nM |
| CHEMBL305521  | CCN1c2cccc(C)c2N(C)C(=O)c3cccnc13                                     | 240 | nM |
| CHEMBL70850   | CCN1c2nc(C)c(C)cc2N(C)C(=O)c3cccnc13                                  | 240 | nM |
| CHEMBL108360  | CC(C)c1c(O)nc(SCC(=O)c2ccc(C)cc2)nc1Cc3cccc4cccc34                    | 240 | nM |
| CHEMBL108647  | CC(C)c1c(O)nc(SCC(=O)c2ccc(C)cc2C)nc1Cc3cccc4cccc34                   | 240 | nM |
| CHEMBL125112  | CCNc1ccnc1N(CC)C2CCN(CC2)C(=O)c3cc4cc(NS(=O)(=O)N5CCN(C)CC5)ccc4[nH]3 | 240 | nM |
| CHEMBL340822  | CCCN(C1CCN(CC1)C(=O)c2cc3cc(NS(=O)(=O)C)ccc3[nH]2)c4ncccc4NC(C)C      | 240 | nM |
| CHEMBL145796  | CCN1c2nc(OC)cc(C=O)c2NC(=O)c3cccnc13                                  | 240 | nM |
| CHEMBL294720  | Nc1ccc(CO[C@H]2C(=O)Nc3ccc(Cl)cc3[C@@]2(C#CC4CC4)C(F)(F)F)cc1F        | 241 | nM |
| CHEMBL68353   | FC(F)(F)C12NC(=O)Nc3ccc(Cl)c(OC(=C1)c4cccc4)c23                       | 244 | nM |
| CHEMBL297982  | CCN1c2ncccc2c3ncn3c4c(C)ccnc14                                        | 245 | nM |
| CHEMBL56383   | CN1C(=O)c2cc(N)enc2Oc3cc(C)ccc13                                      | 250 | nM |
| CHEMBL329653  | CCC1(Oc2cccc2n3cccc3C1=O)c4cccc4                                      | 250 | nM |
| CHEMBL100629  | CCN1c2ncccc2N(C)C(=O)c3cc(\C=C/c4cccc4)nc13                           | 250 | nM |
| CHEMBL331330  | CCN(C1CCN(CC1)C(=O)c2cc3cc(NS(=O)(=O)C)ccc3[nH]2)c4ncccc4NC(C)C       | 250 | nM |
| CHEMBL130177  | COC(=O)c1ccnc1N(C)C2CCN(CC2)C(=O)c3cc4cc(NS(=O)(=O)C)ccc4[nH]3        | 250 | nM |
| CHEMBL143976  | CCN1c2nc(\C=C\C(=O)N)ccc2N(C)C(=O)c3cccnc13                           | 250 | nM |
| CHEMBL39999   | Brc1ccc(NC(=S)NCCc2cccn2)nc1                                          | 251 | nM |
| CHEMBL57697   | CCCN1C(=O)c2cc(N)ccc2Oc3cccc(C)c13                                    | 260 | nM |
| CHEMBL328168  | CCN1c2nc(Cl)ccc2N(C)C(=O)c3cc(NCc4cccc4)nc13                          | 260 | nM |
| CHEMBL108581  | CCc1c(O)nc(SCC(=O)c2ccc(Cl)cc2)nc1Cc3cccc4cccc34                      | 260 | nM |
| CHEMBL124726  | CCc1cc(NCc2oc3c(CC)cccc3n2)c(O)nc1C                                   | 260 | nM |
| CHEMBL299073  | Fc1ccc2NC(=O)C(C#CC3CC3)(N(CC4CC4)c2c1)C(F)(F)F                       | 263 | nM |
| CHEMBL314061  | CCc1cc(NCc2cccc2OC)c(O)nc1C                                           | 265 | nM |
| CHEMBL82481   | Clc1ccc2NC(=O)NC(C#Cc3cncn3)(C4CC4)c2c1                               | 270 | nM |
| CHEMBL341512  | CN(C)c1ccc2c(C)nc(CCCCCC(=O)c3cccc3)n2n1                              | 270 | nM |
| CHEMBL132883  | CCCc1ccnc1N(CC)C2CCN(CC2)C(=O)c3cc4cc(NS(=O)(=O)C)ccc4[nH]3           | 270 | nM |
| CHEMBL341667  | O=C1Nc2c(COCc3cccc3)ccnc2N(C4CC4)c5ncccc15                            | 270 | nM |
| CHEMBL150424  | CC(C)OC(=O)c1cccn1S(=O)(=O)c2cc(Cl)ccc2N                              | 270 | nM |
| CHEMBL291400  | FC(F)(F)[C@]1(NC(=O)Nc2ccc(Cl)cc12)C#Cc3cccc3                         | 277 | nM |
| CHEMBL56628   | CN1C(=O)c2cc(ccc2Oc3cc(C)ccc13)C#N                                    | 280 | nM |
| CHEMBL317080  | CCN1c2ncc(COc3ccc(F)cc3)cc2C(=O)N(C)c4ccc(Cl)nc14                     | 280 | nM |
| CHEMBL338992  | CCc1cc(NCc2oc3CCCCc3n2)c(O)nc1C                                       | 280 | nM |
| CHEMBL123779  | Cc1cccc(CSc2nc(N)cc(Cl)n2)c1                                          | 280 | nM |
| CHEMBL339354  | Nc1cc(nc(SCc2ccc3cccc3c2)n1)C(F)(F)F                                  | 280 | nM |
| CHEMBL2115325 | CCN1c2cccnc2N(C)C(=O)c3cc(N)enc13                                     | 280 | nM |
| CHEMBL416853  | CC(C)C#C[C@@]1(NC(=O)Nc2ccc(Cl)cc12)C(F)(F)F                          | 281 | nM |
| CHEMBL70255   | CCN1c2cc(cc(Cl)c2N(C)C(=O)c3cccnc13)C(F)(F)F                          | 290 | nM |
| CHEMBL144872  | Cc1cccc1OCc2ccnc3N(C4CC4)c5ncccc5C(=O)Nc23                            | 290 | nM |
| CHEMBL2115328 | CN1C(=O)c2cccnc2N(C3CC3)c4ncc(Cl)cc14                                 | 290 | nM |
| CHEMBL39021   | Cc1cccc(c1)C(OCCn2c(C)nc2[N+](=O)[O-])c3cccc3                         | 300 | nM |

|              |                                                                                 |        |    |
|--------------|---------------------------------------------------------------------------------|--------|----|
| CHEMBL40632  | <chem>Cc1ncc([N+](=O)[O-])n1CCOC(c2ccccc2)c3cccc(c3)[N+](=O)[O-]</chem>         | 300    | nM |
| CHEMBL301055 | <chem>Nc1cccc(c1C#N)S(=O)(=O)c2cc(Cl)ccc2Cl</chem>                              | 300    | nM |
| CHEMBL69855  | <chem>C1CC1N2c3ncccc3C=Cc4ccnc24</chem>                                         | 300    | nM |
| CHEMBL100844 | <chem>CCN1c2ncccc2N(C)C(=O)c3cc(CCCO)cnc13</chem>                               | 300    | nM |
| CHEMBL124557 | <chem>CCc1cc(NCc2ccc3ccccc3c2)c(S)nc1C</chem>                                   | 300    | nM |
| CHEMBL339406 | <chem>CC(C)Nc1ccnc1N(C)C2CCN(CC2)C(=O)c3cc4ccc(OCCOCCOCCO)c</chem>              | 300    | nM |
| CHEMBL124149 | <chem>c4[nH]3</chem>                                                            | 300    | nM |
| CHEMBL124149 | <chem>CC(=O)c1cc(NCc2oc3c(Cl)ccc(Cl)c3n2)c(O)nc1C</chem>                        | 300    | nM |
| CHEMBL357411 | <chem>CCN1c2nc(ccc2N(C)C(=O)c3ccnc13)N4CCCCC4</chem>                            | 300    | nM |
| CHEMBL347403 | <chem>CCC(C)Sc1nc(O)cc(Cc2ccccc2[N+](=O)[O-])n1</chem>                          | 300    | nM |
| CHEMBL157137 | <chem>CCC(C)Sc1nc(O)cc(Cc2cccc(c2)[N+](=O)[O-])n1</chem>                        | 300    | nM |
| CHEMBL155689 | <chem>CCC(C)Sc1nc(O)cc(Cc2ccccc2F)n1</chem>                                     | 300    | nM |
| CHEMBL262184 | <chem>CCN1c2ncc(COc3ccc4[nH]ccc4c3)cc2C(=O)N(C)c5ccc(Cl)nc15</chem>             | 310    | nM |
| CHEMBL144866 | <chem>CCN1c2ncccc2C(=O)N(C)c3ccc(nc13)n4cccn4</chem>                            | 310    | nM |
| CHEMBL174953 | <chem>Cc1nc(O)c(CCc2oc3ccccc3n2)cc1C#N</chem>                                   | 310    | nM |
| CHEMBL46008  | <chem>CC(=C)OC(=O)N1c2cc(Cl)ccc2NC(=O)C1(C#CC3CC3)C(F)(F)F</chem>               | 315    | nM |
| CHEMBL320702 | <chem>CCc1c(O)nc(SCC(=O)c2ccc(C)cc2)nc1Cc3cccc4ccccc34</chem>                   | 320    | nM |
| CHEMBL316773 | <chem>CC(C)c1c(O)nc(SCC(=O)c2ccc(Cl)cc2)nc1Cc3cccc4ccccc34</chem>               | 320    | nM |
| CHEMBL133250 | <chem>COc1ccc2[nH]cc(CC\N=C(/S)\Nc3ccc(Br)cn3)c2c1</chem>                       | 320    | nM |
| CHEMBL418104 | <chem>CN1C(=O)c2cc(N)cnc2Oc3cc(C)c(C)cc13</chem>                                | 322    | nM |
| CHEMBL49531  | <chem>FC(F)(F)C1(C#CC2CC2)N(CC3CC3)c4cc(Cl)ccc4NC1=O</chem>                     | 329    | nM |
| CHEMBL100951 | <chem>CCN1c2ncc(COc3cccc4[nH]ccc4c3)cc2C(=O)N(C)c5ccc(Cl)nc15</chem>            | 330    | nM |
| CHEMBL101834 | <chem>CCN1c2nc(Cl)ccc2N(C)C(=O)c3cc(CCC4ccc(NS(=O)(=O)C)cc4)cnc13</chem>        | 330    | nM |
| CHEMBL125928 | <chem>COC(=O)c1cccc(CSc2nc(N)cc(Cl)n2)c1</chem>                                 | 330    | nM |
| CHEMBL342342 | <chem>CCN1c2nc(cc(C=O)c2NC(=O)c3ccnc13)c4cccc(OC)c4</chem>                      | 330    | nM |
| CHEMBL311050 | <chem>Clc1ccc2NC(=O)N[C@@](C#Cc3cccn3)(C4CC4)c2c1</chem>                        | 334.07 | nM |
| CHEMBL123553 | <chem>CCc1cc(NCc2oc3c(Cl)cccc3c2)c(O)nc1C</chem>                                | 335    | nM |
| CHEMBL48286  | <chem>FC(F)(F)C1(C#CC2CC2)N(CCC3CC3)c4ccccc4NC1=O</chem>                        | 340    | nM |
| CHEMBL56567  | <chem>CC(C)N1C(=O)c2ccccc2Oc3ccccc13</chem>                                     | 340    | nM |
| CHEMBL125205 | <chem>Clc1ccc2ncc(CCCCCC(=O)c3ccccc3)n2n1</chem>                                | 340    | nM |
| CHEMBL357250 | <chem>CCN1c2nc(O)cc(Cc3ccccc3)c2NC(=O)c4ccnc14</chem>                           | 340    | nM |
| CHEMBL293785 | <chem>CCN1C(=O)c2ccnc2Oc3cccc(c13)[N+](=O)[O-]</chem>                           | 343    | nM |
| CHEMBL37067  | <chem>CC1=C(Sc2ccccc2)N(COCc3ccccc3)C(=O)NC1=O</chem>                           | 346.41 | nM |
| CHEMBL288305 | <chem>CCN1c2ncccc2C(=O)N(C)c3ccc(C)nc13</chem>                                  | 346.41 | nM |
| CHEMBL306032 | <chem>CCN1c2ccccc2N(C)C(=O)c3ccnc13</chem>                                      | 350    | nM |
| CHEMBL85142  | <chem>CCOc1cccc1CNe2cc(CC)c(C)nc2O</chem>                                       | 350    | nM |
| CHEMBL124610 | <chem>CCC(C)(C)Nc1ccnc1N(C)C2CCN(CC2)C(=O)c3cc4cc(NS(=O)(=O)C)ccc4[nH]3</chem>  | 350    | nM |
| CHEMBL254206 | <chem>COc1ccc(CCNC(=S)Nc2ncsc2)cc1</chem>                                       | 350    | nM |
| CHEMBL399069 | <chem>CCCc1esc(NC(=S)NCCc2ccccc2)n1</chem>                                      | 350    | nM |
| CHEMBL340869 | <chem>CCOC(=O)CCCC=C(c1cc(Br)c(OC)c(c1)C(=O)OC)c2cc(Br)c(OC)c(c2)C(=O)OC</chem> | 359    | nM |
| CHEMBL309574 | <chem>CCN1c2ncccc2N(C(=O)C)C(=O)c3ccnc13</chem>                                 | 360    | nM |
| CHEMBL121827 | <chem>CC(C)Nc1ccc(Cl)nc1N(C)C2CCN(CC2)C(=O)c3cc4cc(NS(=O)(=O)C)cc4[nH]3</chem>  | 360    | nM |
| CHEMBL95426  | <chem>CCc1cc(CCc2nc3ccccc3s2)c(O)nc1C</chem>                                    | 370    | nM |
| CHEMBL107606 | <chem>COc1ccc(cc1)C(=O)CSc2nc(O)c(C)c(Cc3cccc4ccccc34)n2</chem>                 | 370    | nM |
| CHEMBL56451  | <chem>CCCN1C(=O)c2ccccc2Oc3ccccc13</chem>                                       | 375    | nM |
| CHEMBL58542  | <chem>CCCCC=C(c1cc(Br)c(OC)c(c1)C(=O)OC)c2cc(Br)c(OC)c(c2)C(=O)OC</chem>        | 380    | nM |
| CHEMBL70312  | <chem>CCN1C(=O)c2ccnc2N(CC)c3ccccc13</chem>                                     | 380    | nM |

|               |                                                                           |        |    |
|---------------|---------------------------------------------------------------------------|--------|----|
| CHEMBL73845   | CCN1c2ccccc2NC(=O)c3ccnc13                                                | 380    | nM |
| CHEMBL340556  | CCNc1ccnc1N(C(C)C)C2CCN(CC2)C(=O)c3cc4cc(NS(=O)(=O)C)ccc4[nH]3            | 380    | nM |
| CHEMBL332675  | CCN(C1CCN(CC1)C(=O)c2cc3cc(NS(=O)(=O)N4CCN(C)CC4)ccc3[nH]2)c5ncccc5NC(C)C | 380    | nM |
| CHEMBL125084  | Cc1nc(CCCCCC(O)c2ccccc2)n3nc(Cl)ccc13                                     | 380    | nM |
| CHEMBL358564  | CCN1c2nc(ccc2N(C)C(=O)c3ccnc13)c4cnes4                                    | 380    | nM |
| CHEMBL173635  | CCc1cc(CCc2oc(en2)c3ccccc3)c(O)nc1C                                       | 385    | nM |
| CHEMBL315990  | Cc1ccc(cc1C)C23SCCN2C(=O)c4ccccc34                                        | 390    | nM |
| CHEMBL144561  | CCN1c2nc(ccc2N(C)C(=O)c3ccnc13)c4ccn[nH]4                                 | 390    | nM |
| CHEMBL345006  | CCN1c2nc(N\C=C\C)ccc2N(C)C(=O)c3ccnc13                                    | 390    | nM |
| CHEMBL285510  | CCC1OC(C#CC2CC2)(c3cc(Cl)ccc3NC1=O)C(F)(F)F                               | 391    | nM |
| CHEMBL295978  | CCN1c2ncccc2c3nccn3c4ccc(OC)nc14                                          | 392.79 | nM |
| CHEMBL43293   | Cc1ncc([N+](=O)[O-])n1CCOC(c2ccccc2)c3ccccc3F                             | 400    | nM |
| CHEMBL299714  | CCOC(=O)c1cccn1S(=O)(=O)c2cc(Cl)ccc2N                                     | 400    | nM |
| CHEMBL55258   | CCCN1C(=O)c2ccccc2Sc3ccccc13                                              | 400    | nM |
| CHEMBL71927   | CCN1c2cc(ccc2N(C)C(=O)c3ccnc13)[N+](=O)[O-]                               | 400    | nM |
| CHEMBL83641   | CCc1cc(CCc2cc(CC)c(C)nc2O)c(O)nc1C                                        | 400    | nM |
| CHEMBL91942   | CCOc1ccc(F)c(CC\N=C(/N)\Nc2ccc(Br)cn2)c1Cl                                | 400    | nM |
| CHEMBL93822   | Brc1ccc(NC(=S)NCCC2=CCCC2)nc1                                             | 400    | nM |
| CHEMBL340453  | CCNc1ccnc1N(CC)C2CCN(CC2)C(=O)c3cc4cc(NS(=O)(=O)CC)ccc4[nH]3              | 400    | nM |
| CHEMBL341931  | CCc1c(C)nc(O)cc1Sc2cc(C)cc(C)c2                                           | 400    | nM |
| CHEMBL145295  | CCN1c2nc(ccc2N(C)C(=O)c3ccnc13)N4CCOCC4                                   | 400    | nM |
| CHEMBL356611  | CCCOc(=O)c1cccn1S(=O)(=O)c2cc(Cl)ccc2N                                    | 400    | nM |
| CHEMBL349806  | Oc1cc(Cc2c(Cl)cccc2Cl)nc(SC3CCCC3)n1                                      | 400    | nM |
| CHEMBL155864  | CCC(C)Sc1nc(O)c(C)c(Cc2ccccc2Cl)n1                                        | 400    | nM |
| CHEMBL351121  | CCC(C)Sc1nc(O)c(C)c(Cc2cccc(c2)[N+](=O)[O-])n1                            | 400    | nM |
| CHEMBL170942  | COc1cccc(CC\N=C(/S)\Nc2ccc(Br)cn2)c1                                      | 400    | nM |
| CHEMBL254416  | CC(C)Oc1cccc(CCNC(=S)Nc2nccs2)c1                                          | 400    | nM |
| CHEMBL60513   | COc1ccc2NC(=O)N[C@@](C#CC(C)C)(c2c1)C(F)(F)F                              | 401    | nM |
| CHEMBL300721  | CC(C)CN1c2cc(Cl)ccc2NC(=O)C1(C#CC3CC3)C(F)(F)F                            | 404    | nM |
| CHEMBL311349  | CCN1c2ncccc2C(=O)Nc3cc(C)c(C)nc13                                         | 410    | nM |
| CHEMBL321980  | CC(C)c1c(O)nc(SCC(=O)C)nc1Cc2ccccc3ccccc23                                | 410    | nM |
| CHEMBL336318  | CCN(C1CCN(CC1)C(=O)c2cc3cc(NS(=O)(=O)C)ccc3[nH]2)c4ncccc4CC(C)C           | 410    | nM |
| CHEMBL146828  | O=C1Nc2c(COc3ccc(cc3)C#N)ccnc2N(C4CC4)c5ncccc15                           | 410    | nM |
| CHEMBL348086  | CCC(C)Sc1nc(O)c(C)c(Cc2ccccc2F)n1                                         | 410    | nM |
| CHEMBL57216   | Nc1ccc(CO[C@H]2C(=O)Nc3ccc(Cl)cc3[C@@]2(C#CC4CC4)C(F)(F)F)cc1             | 412    | nM |
| CHEMBL70930   | CN1C(=O)c2ccnc2N(C(=O)C)c3cc(C)c(C)cc13                                   | 420    | nM |
| CHEMBL143250  | CCN1c2nc(O)cc(CO)c2NC(=O)c3ccnc13                                         | 420    | nM |
| CHEMBL434122  | O=C1Nc2c(COCCc3ccccc3)ccnc2N(C4CC4)c5ncccc15                              | 420    | nM |
| CHEMBL283614  | CC(C)C#CC1(OCC(=O)Nc2ccc(Cl)cc12)C(F)(F)F                                 | 423    | nM |
| CHEMBL42132   | CCN1c2ncccc2c3ncc(C)n3c4ccnc14                                            | 425    | nM |
| CHEMBL2114370 | C[C@@H]1O[C@@](C#CC2CC2)(c3cc(F)ccc3NC1=O)C(F)(F)F                        | 429.3  | nM |
| CHEMBL70077   | Oc1c(Cl)ccc2NC(=O)NC(C#Cc3ccccc3)(c12)C(F)(F)F                            | 430    | nM |
| CHEMBL424046  | O=C1Nc2ccnc2N(C3CCC3)c4ncccc14                                            | 430    | nM |
| CHEMBL321765  | CCN1c2ncccc2N(C)C(=O)c3cc(CCO)nc13                                        | 430    | nM |
| CHEMBL124453  | CCSc1cc(NCc2oc3ccccc3n2)c(O)nc1C                                          | 430    | nM |
| CHEMBL32290   | FC(F)(F)C1(OCC(=O)Nc2ccc(Cl)cc12)C#CC3CC3                                 | 432    | nM |



|               |                                                                    |        |    |
|---------------|--------------------------------------------------------------------|--------|----|
| CHEMBL59215   | FC(F)(F)[C@@]1(C#CC2CC2)[C@H](OCc3ccnc3)C(=O)Nc4ccc(C)cc14         | 438    | nM |
| CHEMBL291024  | CCN1c2neccc2NC(=O)c3ccnc13                                         | 440    | nM |
| CHEMBL58970   | FC(F)(F)[C@@]1(C#CC2CC2)[C@H](OCc3ccccc3)C(=O)Nc4ccc(C)cc14        | 440    | nM |
| CHEMBL123778  | CCc1cc(NCc2oc3cccc(O)c3n2)c(O)nc1C                                 | 440    | nM |
| CHEMBL2114371 | CC[C@@H]1O[C@@](C#CC2CC2)(c3cc(F)ccc3NC1=O)C(F)(F)F                | 441.52 | nM |
| CHEMBL94526   | Fe1cc2NC(=O)OC(C#CC3CC3)(c2c(F)c1F)C(F)(F)F                        | 442    | nM |
| CHEMBL177898  | CCc1cc(CCc2oc3cc(F)ccc3n2)c(O)nc1C                                 | 442    | nM |
| CHEMBL127283  | CCNc1ccnc1N(CC)C2CCN(CC2)C(=O)c3cc4cc(NS(=O)(=O)C)ccc4[nH]3        | 444.75 | nM |
| CHEMBL289816  | O=C1Nc2ccnc2N(C3CC3)c4ncccc14                                      | 450    | nM |
| CHEMBL290957  | CCCN1c2neccc2N(C)C(=O)c3ccnc13                                     | 450    | nM |
| CHEMBL79696   | Clc1ccc2NC(=O)NC(C#Cc3cnc3)(C4CC4)c2c1                             | 450    | nM |
| CHEMBL122460  | CCNc1ccnc1N(CC)C2CCN(CC2)C(=O)c3cc4cc(NS(=O)(=O)C(C)C)cc4[nH]3     | 450    | nM |
| CHEMBL144136  | CC(C\N=C(/S)\Nc1nccs1)c2ccccc2                                     | 450    | nM |
| CHEMBL151896  | COC(=O)c1cccn1S(=O)(=O)c2cc(Cl)ccc2N                               | 450    | nM |
| CHEMBL101998  | CCN1c2ncc(CCc3cnc3)cc2C(=O)N(C)c4ccc(nc14)C#N                      | 460    | nM |
| CHEMBL127456  | CCN(C1CCN(CC1)C(=O)c2cc3cc(NS(=O)(=O)C)ccc3[nH]2)c4nc(F)ccc4NC(C)C | 460    | nM |
| CHEMBL124494  | Nc1cc(Cl)nc(SCc2ccc3ccccc3c2)n1                                    | 460    | nM |
| CHEMBL145158  | Oc1ccccc1OCc2ccnc3N(C4CC4)c5ncccc5C(=O)Nc23                        | 460    | nM |
| CHEMBL301443  | C=CCN1C(=O)c2ccccc2Oe3ccccc13                                      | 465    | nM |
| CHEMBL125397  | CCc1cc(NCc2oc3ccc(F)cc3n2)c(O)nc1C                                 | 470    | nM |
| CHEMBL146169  | CCN1c2neccc2C(=O)N(C)c3ccc(O)nc13                                  | 470    | nM |
| CHEMBL316083  | FC(F)(F)C1(OC(=O)Nc2ccccc12)C#CC3CC3                               | 478    | nM |
| CHEMBL125324  | CCCN(C1CCN(CC1)C(=O)c2cc3cc(NS(=O)(=O)C)ccc3[nH]2)c4ncccc4NC(C)C   | 480    | nM |
| CHEMBL124279  | Nc1cc(Cl)nc(SCc2ccc(Cl)c(Cl)c2)n1                                  | 490    | nM |
| CHEMBL145893  | CCN1c2nc(cc(COc3ccccc3)c2NC(=O)c4ccnc14)c5ccccc(OC)c5              | 490    | nM |
| CHEMBL131761  | COC(=O)c1cc(cc(Br)c1OC)C(=CCCN2CCOC2=O)c3cc(Br)c(OC)c(c3)C(=O)OC   | 499    | nM |
| CHEMBL37056   | CC(C)Nc1ccnc1N2CCN(CC2)C(=O)c3cc4ccc(NS(=O)(=O)C)cc4[nH]3          | 500    | nM |
| CHEMBL416617  | Cc1ncc([N+](=O)[O-])n1CCOC(c2ccccc2)c3cccc(Cl)c3                   | 500    | nM |
| CHEMBL288629  | Cc1ncc([N+](=O)[O-])n1CCOC(c2ccccc2)c3cccc(F)c3                    | 500    | nM |
| CHEMBL305010  | CCN1c2ccccc2C(=O)N(C)c3ccnc13                                      | 500    | nM |
| CHEMBL91891   | CCC1(Oc2ccccc2n3ccccc3C1=O)c4ccc5ccccc5c4                          | 500    | nM |
| CHEMBL156083  | CCCCSc1nc(O)cc(Cc2c(Cl)cccc2Cl)n1                                  | 500    | nM |
| CHEMBL199090  | CC(C)CC(=O)c1c(O)c(CC(=C(C)C)O)c2OC(=O)C=C(c3ccccc3)c2c1O          | 500    | nM |
| CHEMBL297103  | COC(=O)N1c2ccccc2NC(=O)C1(C#CC3CC3)C(F)(F)F                        | 504    | nM |
| CHEMBL82904   | CCc1ccc(CNc2cc(CC)c(C)nc2O)c(OC)c1                                 | 510    | nM |
| CHEMBL133469  | CC(C)Cc1ccnc1N(C)C2CCN(CC2)C(=O)c3cc4cc(NS(=O)(=O)C)ccc4[nH]3      | 510    | nM |
| CHEMBL340193  | CN(C1CCN(CC1)C(=O)c2cc3cc(NS(=O)(=O)C)ccc3[nH]2)c4ncccc4N          | 520    | nM |
| CHEMBL313695  | CCc1cc(NCc2ccccc2[N+](=O)[O-])c(O)nc1C                             | 530    | nM |
| CHEMBL330990  | CN(C1CCN(CC1)C(=O)c2cc3cc(NS(=O)(=O)C)ccc3[nH]2)c4nc(F)ccc4NC(C)C  | 530    | nM |
| CHEMBL100968  | CCN1c2neccc2N(C)C(=O)c3cc(CCc4cnc4)cnc13                           | 540    | nM |
| CHEMBL85446   | Cc1cccc(c1)C23SCCN2C(=O)c4ccccc34                                  | 547.72 | nM |
| CHEMBL107200  | COC(=O)CCCC=C(c1cc(Br)c(OC)c(c1)C(=O)OC)c2cc(Br)c(OC)c(c2)         | 547.72 | nM |

|               |                                                                                                      |        |    |
|---------------|------------------------------------------------------------------------------------------------------|--------|----|
|               | C(=O)OC                                                                                              |        |    |
| CHEMBL106661  | Cc1c(O)nc(SCC(=O)c2ccc(Cl)cc2)nc1Cc3cccc4cccc34                                                      | 550    | nM |
| CHEMBL127427  | Cc1cn(en1)c2ccc3c(C)nc(CCCCCC(=O)c4cccc4)n3n2                                                        | 550    | nM |
| CHEMBL410771  | FC(F)(F)c1esc(NC(=S)NCCc2cccc2)n1                                                                    | 550    | nM |
| CHEMBL2115335 | CCN1c2cc(Br)cnc2N(C)C(=O)c3ccnc13                                                                    | 550    | nM |
| CHEMBL299710  | CCN1C(=O)c2cccc2Oc3cccc13                                                                            | 560    | nM |
| CHEMBL340248  | Cc1nc(CCCCCC(=O)c2cccc2)n3ncccc13                                                                    | 560    | nM |
| CHEMBL312340  | CCN1c2ccc(C)cc2C(=O)N(C)c3ccnc13                                                                     | 580    | nM |
| CHEMBL356313  | Cc1ccc(OCc2ccnc3N(C4CC4)c5ncccc5C(=O)Nc23)cc1                                                        | 580    | nM |
| CHEMBL71023   | CC(C)N1c2ncccc2NC(=O)c3ccnc13                                                                        | 590    | nM |
| CHEMBL314633  | Clc1cc(Cl)cc(c1)C23SCCN2C(=O)c4cccc34                                                                | 590    | nM |
| CHEMBL103716  | CCN1c2nc(ccc2N(C)C(=O)c3cc(CCc4cccc4)enc13)C5=CCC=N5                                                 | 590    | nM |
| CHEMBL102735  | CCN1c2ncc(CN(C)c3cccc3)cc2C(=O)N(C)c4ccc(Cl)nc14                                                     | 590    | nM |
| CHEMBL32038   | CC(C)C1OC(C#CC2CC2)(c3cc(Cl)ccc3NC1=O)C(F)(F)F                                                       | 597    | nM |
| CHEMBL288535  | Cc1ncc([N+](=O)[O-])n1CCOC(c2cccc2)c3cccc3Cl                                                         | 600    | nM |
| CHEMBL295585  | Fe1cccc1CC\N=C(/S)\Nc2ccc(Br)cn2                                                                     | 600    | nM |
| CHEMBL298405  | CN1C(=O)c2cccc2Oc3cc(C)ccc13                                                                         | 600    | nM |
| CHEMBL69952   | Brc1ccc(NC(=S)NCCN2CCCC2)nc1                                                                         | 600    | nM |
| CHEMBL102957  | Clc1cccc1CCNC(=S)Nc2nccs2                                                                            | 600    | nM |
| CHEMBL415716  | CCc1c(C)nc(O)c(NCc2oc3cccc3n2)c1C                                                                    | 600    | nM |
| CHEMBL357409  | CCOC(=O)c1c(O)nc(C)c(CC)c1Sc2cc(C)cc(C)c2                                                            | 600    | nM |
| CHEMBL156380  | CC(C)CSc1nc(O)cc(Cc2c(Cl)cccc2Cl)n1                                                                  | 600    | nM |
| CHEMBL346023  | CCC(C)Sc1nc(O)cc(Cc2cccc(F)c2)n1                                                                     | 600    | nM |
| CHEMBL254836  | CCc1esc(NC(=S)NCCc2cccc2)n1                                                                          | 600    | nM |
| CHEMBL46209   | FC(F)(F)C1(C#CC2CC2)N(CC=C)c3cccc3NC1=O                                                              | 601    | nM |
| CHEMBL413751  | CCc1cc(c(O)nc1C)C(OCc2c(F)cccc2F)(C#CC3CC3)C(F)(F)F                                                  | 613    | nM |
| CHEMBL317072  | CCN1c2ncccc2N(C)C(=O)c3cc(CCC(=O)N)enc13                                                             | 620    | nM |
| CHEMBL191146  | CCCC1=C(SC2CCCC2)c3cc(Cl)ccc3NC1=O                                                                   | 621.61 | nM |
| CHEMBL190170  | CC(C)C1=C(OC2CCCC2)c3cc(Cl)ccc3NC1=O                                                                 | 630    | nM |
| CHEMBL55610   | CN1C(=O)c2cc(O)ccc2Oc3cc(C)ccc13                                                                     | 640    | nM |
| CHEMBL69657   | CCOCCOCN1C(=O)NC(=O)C2=C1Sc3cccc3NC2                                                                 | 640    | nM |
| CHEMBL435017  | Cc1nc(CCCCCC(=O)c2cccc2)n3nc(ccc13)n4ccnn4                                                           | 640    | nM |
| CHEMBL144591  | O=C1Nc2c(CC3=CCNC3)ccnc2N(C4CC4)c5ncccc15                                                            | 640    | nM |
| CHEMBL1203236 | Cl.COc1ccc2c(C)nc(CCCCCC(=O)c3cccc3)n2n1                                                             | 640    | nM |
| CHEMBL48629   | FC(F)(F)C1(C#CC2CC2)N(CC=C)c3cc(Cl)ccc3NC1=O                                                         | 650    | nM |
| CHEMBL303466  | CN1C(=O)c2ccnc2N(C#C)c3cccc13                                                                        | 650    | nM |
| CHEMBL302931  | CCN1C(=O)c2cccc(C)c2N(CC)c3ncccc13                                                                   | 650    | nM |
| CHEMBL359410  | S=C(NCCc1occc1)Nc2nccs2                                                                              | 650    | nM |
| CHEMBL126214  | CCN(Cc1oc2c(Cl)ccc(Cl)c2n1)c3cc(CC)c(C)nc3O                                                          | 654    | nM |
| CHEMBL294848  | CCCN1C(=O)c2cc(N)ccc2Oc3ccc(C)c(C)c13                                                                | 670    | nM |
| CHEMBL321026  | Cc1ccc(cc1)C(=O)CSc2nc(O)c(C)c(Cc3cccc4cccc34)n2                                                     | 670    | nM |
| CHEMBL301986  | CCCCOC(=O)N1c2cccc2NC(=O)C1(C#CC3CC3)C(F)(F)F                                                        | 672    | nM |
| CHEMBL198050  | COC(=O)CCC\C=C(/c1cccc(c1)C#N)\c2cc(C)c(OC)c(c2)C(=O)OC                                              | 673.5  | nM |
| CHEMBL85533   | CCc1cc(NCc2ccnc2OC)c(O)nc1C<br>COC(=O)c1cc(cc(Cl)c1OC)C(=CCCC(=O)N(C)C)c2cc(Cl)c(OC)c(c2)<br>C(=O)OC | 680    | nM |
| CHEMBL133010  |                                                                                                      | 687    | nM |
| CHEMBL70562   | CCN1C(=O)c2cccc2N(CC)c3ncccc13                                                                       | 690    | nM |
| CHEMBL40631   | Clc1cccc1CCNC(=S)Nc2ccc(Br)cn2                                                                       | 700    | nM |
| CHEMBL40625   | Fe1cccc(CC\N=C(/S)\Nc2ccc(Br)cn2)c1                                                                  | 700    | nM |
| CHEMBL103235  | CCN1c2nc(Cl)ccc2N(C)C(=O)c3cc(COc4cccc(c4)C(=O)OC)cn13                                               | 700    | nM |

|               |                                                                                              |        |    |
|---------------|----------------------------------------------------------------------------------------------|--------|----|
| CHEMBL114559  | <chem>BrC1ccc(NC(=S)NCCc2ccc3OCOc3c2)nc1</chem>                                              | 700    | nM |
| CHEMBL421246  | <chem>CC(C)Nc1ccnc1N(C2CC2)C3CCN(CC3)C(=O)c4cc5ccccc5[nH]4</chem>                            | 700    | nM |
| CHEMBL356278  | <chem>O=C1Nc2c(CN3CCCC3)ccnc2N(C4CC4)c5ncccc15</chem>                                        | 700    | nM |
| CHEMBL215724  | <chem>COC(=O)CCC\C=C(\c1cccc(cc1)C#N)/c2cc(C)c3onc(OC)c3c2</chem>                            | 700    | nM |
| CHEMBL80118   | <chem>CCN1c2nc(ccc2N(C)C(=O)c3ccnc13)c4c[nH]c5ccc(F)cc45</chem>                              | 706    | nM |
| CHEMBL187718  | <chem>CCCC1=C(OC2CCCCC2)c3cc(Cl)ccc3NC1=O</chem>                                             | 710    | nM |
| CHEMBL134227  | <chem>C[C@H]1Oc2c3C=CC(C)(C)Oc3c4C(=CC(=O)Oc4c2[C@@H](OC(=O)C)[C@@H]1C)c5ccccc5</chem>       | 720    | nM |
| CHEMBL283619  | <chem>FC(F)(F)[C@]1(NC(=O)Nc2ccc(Cl)cc12)C#CC3CC3</chem>                                     | 725.95 | nM |
| CHEMBL123478  | <chem>CCN(C1CCN(CC1)C(=O)c2cc3cc(NS(=O)(=O)C)ccc3[nH]2)c4nc(F)cc4NC(C)(C)C</chem>            | 730    | nM |
| CHEMBL121881  | <chem>CC(C)Nc1ccnc1N(C)C2CCN(CC2)C(=O)c3cc4cc(NS(=O)(=O)C)ccc4[nH]3</chem>                   | 740    | nM |
| CHEMBL42656   | <chem>CCN1c2ccnc2N(C)C(=O)c3ccnc13</chem>                                                    | 748.33 | nM |
| CHEMBL100942  | <chem>CCN1c2ncccc2N(C)C(=O)c3cc(C)nc13</chem>                                                | 750    | nM |
| CHEMBL198425  | <chem>COC(=O)CCC\C=C(/c1cccc(c1)C#N)\c2cc(Cl)c(OC)c(c2)C(=O)OC</chem>                        | 750    | nM |
| CHEMBL37789   | <chem>CC(C)Nc1ccnc1N2CCN(CC2)C(=O)c3cc4ccc(CO)cc4[nH]3</chem>                                | 760    | nM |
| CHEMBL39950   | <chem>CCN1c2ncc(C)cc2N(C)C(=O)c3ccnc13</chem>                                                | 760    | nM |
| CHEMBL340593  | <chem>Nc1cc(Cl)nc(SCc2ccccc(Br)c2)n1</chem>                                                  | 760    | nM |
| CHEMBL2115334 | <chem>CN1C(=O)c2ccnc2N(C3CC3)c4cc(Cl)nc14</chem>                                             | 760    | nM |
| CHEMBL313175  | <chem>Cc1cccc(cc1)C23SCCN2C(=O)c4ccccc34</chem>                                              | 770    | nM |
| CHEMBL106646  | <chem>CCc1cc(c(O)nc1C)C(OC)(C#CC2CC2)C(F)(F)F</chem>                                         | 770    | nM |
| CHEMBL85425   | <chem>CCc1cc(NCc2ccccc2C#N)c(O)nc1C</chem>                                                   | 790    | nM |
| CHEMBL125896  | <chem>CCN(C1CCN(CC1)C(=O)c2cc3cc(NS(=O)(=O)N4CCN(C)CC4)ccc3[nH]2)c5ncccc5NC(C)(C)C</chem>    | 790    | nM |
| CHEMBL94779   | <chem>Fe1ccc(F)c2c1NC(=O)OC2(C#CC3CC3)C(F)(F)F</chem>                                        | 796    | nM |
| CHEMBL283630  | <chem>CCCC1OC(C#CC2CC2)(c3cc(Cl)ccc3NC1=O)C(F)(F)F</chem>                                    | 799    | nM |
| CHEMBL314572  | <chem>CCC(c1cc(O)nc(SC(C)C)n1)c2cccc3ccccc23</chem>                                          | 800    | nM |
| CHEMBL317765  | <chem>Fe1cc(F)c2NC(=O)OC(C#CC3CC3)(c2c1F)C(F)(F)F</chem>                                     | 800    | nM |
| CHEMBL100394  | <chem>CCN1c2nc(Cl)ccc2N(C)C(=O)c3cc(COc4ccc(cc4)C(=O)OC)nc13</chem>                          | 800    | nM |
| CHEMBL116474  | <chem>BrC1ccc(NC(=S)NCCc2cccs2)nc1</chem>                                                    | 800    | nM |
| CHEMBL145279  | <chem>CCN1c2nc(OC)cc(C3OCCCO3)c2NC(=O)c4ccnc14</chem>                                        | 800    | nM |
| CHEMBL157777  | <chem>CSc1nc(O)cc(Cc2c(F)cccc2F)n1</chem>                                                    | 800    | nM |
| CHEMBL94550   | <chem>CN(C)c1ccc2NC(=O)OC(C#CC3CC3)(c2c1)C(F)(F)F</chem>                                     | 816    | nM |
| CHEMBL145004  | <chem>CCN1c2ncccc2C(=O)N(C)c3ccc(nc13)c4ccccc4OC</chem>                                      | 820    | nM |
| CHEMBL331684  | <chem>CCN(C1CCN(CC1)C(=O)c2cc3cc(NS(=O)(=O)N4CCN(C)CC4)ccc3[nH]2)c5nc(F)ccc5NC(C)(C)C</chem> | 830    | nM |
| CHEMBL351375  | <chem>O=C1N2CCS[C@@H](c3ccccc23)c4ccccc14</chem>                                             | 830    | nM |
| CHEMBL290410  | <chem>CSCN1c2ncccc2N(C)C(=O)c3ccnc13</chem>                                                  | 850    | nM |
| CHEMBL310490  | <chem>CN1C(=O)c2ccnc2N(CC=C)c3ncccc13</chem>                                                 | 850    | nM |
| CHEMBL70743   | <chem>CCN1c2nc(N)c(Cl)cc2N(C)C(=O)c3ccnc13</chem>                                            | 850    | nM |
| CHEMBL142478  | <chem>COc1ccc(O)c(Cc2ccnc3N(C4CC4)c5ncccc5C(=O)Nc23)c1</chem>                                | 850    | nM |
| CHEMBL280527  | <chem>CCNc1ccnc1N2CCN(CC2)C(=O)c3cc4cc(OC)ccc4[nH]3</chem>                                   | 853.23 | nM |
| CHEMBL305416  | <chem>CCN1c2cc(ccc2N(C)C(=O)c3cc(Br)nc13)[N+](=O)[O-]</chem>                                 | 890    | nM |
| CHEMBL57178   | <chem>Fe1ccc(CO[C@H]2C(=O)Nc3ccc(Cl)cc3[C@@]2(C#CC4CC4)C(F)(F)F)cc1</chem>                   | 899    | nM |
| CHEMBL33981   | <chem>S=C(NCCc1ccccc1)Nc2nccs2</chem>                                                        | 900    | nM |
| CHEMBL54977   | <chem>CCCN1C(=O)c2cc(N)ccc2Oc3c(C)cc(C)cc13</chem>                                           | 900    | nM |
| CHEMBL83362   | <chem>O=C1N2CCSC2(c3ccccc13)c4c5ccccc5cc6ccccc46</chem>                                      | 900    | nM |
| CHEMBL314884  | <chem>O=C1N2CCSC2(c3ccccc4CCc34)c5ccccc15</chem>                                             | 900    | nM |
| CHEMBL149275  | <chem>Nc1ccc(Cl)cc1S(=O)(=O)n2cccc2C(=O)OCC=C</chem>                                         | 900    | nM |
| CHEMBL345908  | <chem>CCC(C)Sc1nc(O)c(C)c(Cc2ccccc(Cl)c2)n1</chem>                                           | 900    | nM |

|               |                                                                                     |         |    |
|---------------|-------------------------------------------------------------------------------------|---------|----|
| CHEMBL170810  | <chem>COc1ccc(CC\N=C(/S)\Nc2ccc(Br)cn2)cc1</chem>                                   | 900     | nM |
| CHEMBL372175  | <chem>COC(=O)CCC\C=C(/c1cc(F)cc(c1)C(F)(F)F)\c2cc(C)c3onc(OC)c3c2</chem>            | 900     | nM |
| CHEMBL357664  | <chem>CCN1c2ncccc2C(=O)Nc3c(COCc4cccc4)cc(OC)nc13</chem>                            | 920     | nM |
| CHEMBL187438  | <chem>CCCc1c(O)nc2ccc(Cl)cc2e1[S+](O-)C3CCCCC3</chem>                               | 951     | nM |
| CHEMBL281239  | <chem>CCC#CC1(OCC(=O)Nc2ccc(Cl)cc12)C(F)(F)F</chem>                                 | 964     | nM |
| CHEMBL262374  | <chem>Cc1ccc(C)c(c1)C23SCCN2C(=O)c4cccc34</chem>                                    | 970     | nM |
| CHEMBL338872  | <chem>CCc1cc(NC(C)c2oc3cccc3c2)c(O)nc1C</chem>                                      | 970     | nM |
| CHEMBL334129  | <chem>COc1cccc(CSc2nc(N)cc(Cl)n2)c1</chem>                                          | 980     | nM |
| CHEMBL37518   | <chem>CC(C)Nc1ccnc1N2CCN(CC2)C(=O)c3cc4cc(N)ccc4[nH]3</chem>                        | 1000    | nM |
| CHEMBL433487  | <chem>CN1C(=O)c2cccnc2Oc3cc(C)cc(N)c13</chem>                                       | 1000    | nM |
| CHEMBL419629  | <chem>CN1C(=O)c2cccnc2N(CCF)c3cccc13</chem>                                         | 1000    | nM |
| CHEMBL313273  | <chem>Cc1ccnc(c1)C23SCCN2C(=O)c4cccc34</chem>                                       | 1000    | nM |
| CHEMBL335768  | <chem>CCCCC=C(c1cc(C)c(OC)c(c1)C(=O)OC)c2cc(C)c(OC)c(c2)C(=O)O</chem>               | 1000    | nM |
| CHEMBL144949  | <chem>C</chem>                                                                      | 1000    | nM |
| CHEMBL141323  | <chem>CCN1c2nc(cc(C)c2NC(=O)c3ccnc13)C(C)C</chem>                                   | 1000    | nM |
| CHEMBL355333  | <chem>CCC(=O)CCCC=C(c1cc(Cl)c(OC)c(c1)C(=O)OC)c2cc(Cl)c(OC)c(c2)C(=O)OC</chem>      | 1000    | nM |
| CHEMBL171920  | <chem>COc1cccc1CC\N=C(/S)\Nc2ccc(Br)cn2</chem>                                      | 1000    | nM |
| CHEMBL198551  | <chem>CCc1cc(CCc2oc3c(Cl)cccc3n2)c(O)nc1C</chem>                                    | 1000    | nM |
| CHEMBL253996  | <chem>COC(=O)c1cc(cc(C)c1OC)\C(=C/CCN2CCOC2=O)\c3ccc(OC)c(OC)c3</chem>              | 1000    | nM |
| CHEMBL2115323 | <chem>Fe1ccc(CCNC(=S)Nc2ncsc2)cc1</chem>                                            | 1000    | nM |
| CHEMBL294840  | <chem>CN1C(=O)c2cccnc2N(C3CC3)c4ccc(Cl)nc14</chem>                                  | 1000    | nM |
| CHEMBL61152   | <chem>COC(=O)CCCC=C(c1cc(Cl)c(OC)c(c1)C(=O)OC)c2cc(Cl)c(OC)c(c2)C(=O)OC</chem>      | 1002.5  | nM |
| CHEMBL86015   | <chem>Nc1cccc1CO[C@H]2C(=O)Nc3ccc(Cl)cc3[C@@]2(C#CC4CC4)C(F)(F)F</chem>             | 1019    | nM |
| CHEMBL357187  | <chem>CC(c1cc(O)nc(SC2CCCC2)n1)c3cccc4cccc34</chem>                                 | 1019.8  | nM |
| CHEMBL318562  | <chem>COC(=O)c1cc(cc(Cl)c1OC)C(=CCCCN=[N+]=[N-])c2cc(Cl)c(OC)c(c2)C(=O)OC</chem>    | 1019.8  | nM |
| CHEMBL340403  | <chem>CCN1c2ncc(CCc3ccc4cccc4c3)cc2C(=O)N(C)c5ccc(Cl)nc15</chem>                    | 1020    | nM |
| CHEMBL422839  | <chem>CCN(C1CCN(CC1)C(=O)c2cc3cc(NS(=O)(=O)C)ccc3[nH]2)c4nc(Cl)ccc4NC(C)(C)C</chem> | 1020    | nM |
| CHEMBL145730  | <chem>O=C1Nc2c(CN3CCOCC3)ccnc2N(C4CC4)c5ncccc15</chem>                              | 1030    | nM |
| CHEMBL357877  | <chem>O=C1Nc2c(CSc3cccc3)ccnc2N(C4CC4)c5ncccc15</chem>                              | 1030    | nM |
| CHEMBL124338  | <chem>COc1ccc(OCc2ccnc3N(C4CC4)c5ncccc5C(=O)Nc23)cc1</chem>                         | 1040    | nM |
| CHEMBL124556  | <chem>CC(C)Nc1ccnc1N(C)C2CCN(CC2)C(=O)c3cc4cc(NS(=O)(=O)C)ccc4[nH]3</chem>          | 1048.81 | nM |
| CHEMBL124992  | <chem>CC(O)c1cc(NCc2oc3c(Cl)ccc(Cl)c3n2)c(O)nc1C</chem>                             | 1050    | nM |
| CHEMBL294406  | <chem>CCc1cc(N(C)Cc2oc3c(Cl)ccc(Cl)c3c2)c(O)nc1C</chem>                             | 1050    | nM |
| CHEMBL337029  | <chem>CCCO[C@H]1C(=O)Nc2ccc(Cl)cc2[C@@]1(C#CC3CC3)C(F)(F)F</chem>                   | 1051    | nM |
| CHEMBL109389  | <chem>C[C@H]1Oc2c3C=CC(C)(C)Oc3c4C(=CC(=O)Oc4c2[C@@H](O)[C@@H]1C)c5cccc5</chem>     | 1067.71 | nM |
| CHEMBL288062  | <chem>CCC(C)Sc1nc(O)c(C)c(Cc2cccc2)n1</chem>                                        | 1095.45 | nM |
| CHEMBL418885  | <chem>CCN1c2ncccc2c3ncc(C)n3c4ccc(nc14)N(C)C</chem>                                 | 1100    | nM |
| CHEMBL85697   | <chem>CCN1c2ccc(cc2N(C)C(=O)c3ccnc13)C(=O)OC</chem>                                 | 1100    | nM |
| CHEMBL420460  | <chem>CCc1cccc(c1)C23SCCN2C(=O)c4cccc34</chem>                                      | 1100    | nM |
| CHEMBL121834  | <chem>CCN1c2ncccc2N(C)C(=O)c3cc(NC(=O)N)nc13</chem>                                 | 1100    | nM |
| CHEMBL142664  | <chem>CCc1cc(NCC2=COc3cccc3C2=O)c(O)nc1C</chem>                                     | 1100    | nM |
| CHEMBL147375  | <chem>CCN1c2nc(ccc2N(C)C(=O)c3ccnc13)c4ccc(O)nc4</chem>                             | 1100    | nM |
| CHEMBL149055  | <chem>S=C(NCCc1cccc(Oc2cccc2)c1)Nc3ncsc3</chem>                                     | 1100    | nM |
|               | <chem>CC(C)Oc1ccnc1N2CCN(CC2)C(=O)c3cc4cc(NS(=O)(=O)C)ccc4[nH]3</chem>              | 1100    | nM |

|               |                                                                                                                |         |    |
|---------------|----------------------------------------------------------------------------------------------------------------|---------|----|
| CHEMBL351323  | CC(C)CSc1nc(O)c(C)c(Cc2c(Cl)cccc2Cl)n1                                                                         | 1100    | nM |
| CHEMBL174267  | Cc1nc(O)c(CCc2oc3ccccc3n2)cc1c4ccccc4                                                                          | 1100    | nM |
| CHEMBL400684  | Oc1ccccc1CCNC(=S)Nc2nccs2                                                                                      | 1100    | nM |
| CHEMBL106204  | CC(=O)CSc1nc(O)c(C)c(Cc2cccc3ccccc23)n1                                                                        | 1120    | nM |
| CHEMBL124991  | CCc1cc(NC(C)c2ccc3ccccc3c2)c(O)nc1C                                                                            | 1130    | nM |
| CHEMBL141443  | [O-][N+](=O)c1ccc(OCc2ccnc3N(C4CC4)c5ncccc5C(=O)Nc23)cc1                                                       | 1130    | nM |
| CHEMBL1807294 | Br1ccccc1c2nc3ccccc3c2NC4CCCC4                                                                                 | 1140.18 | nM |
| CHEMBL439929  | CC(C)COC(=O)N1c2ccccc2NC(=O)C1(C#CC3CC3)C(F)(F)F                                                               | 1142    | nM |
| CHEMBL125666  | Cc1nc(O)c(NCc2oc3ccccc3n2)cc1S(=O)(=O)C                                                                        | 1150    | nM |
| CHEMBL345580  | CC(C)Sc1nc(O)c(C)c(Cc2c(Cl)cccc2Cl)n1                                                                          | 1150    | nM |
| CHEMBL156636  | CCCCSc1nc(O)c(C)c(Cc2c(Cl)cccc2Cl)n1                                                                           | 1150    | nM |
| CHEMBL264587  | CNC(=O)CCCN1C(=O)N(C=C(C)C1=O)[C@@H]2O[C@H](CO[Si](C)(C)C(C)C)[C@@]3(OS(=O)(=O)C=C3N)[C@H]2O[Si](C)(C)C(C)(C)C | 1159.31 | nM |
| CHEMBL37080   | CC(C)Nc1ccnc1N2CCN(CC2)C(=O)c3cc4ccc(O)cc4[nH]3                                                                | 1200    | nM |
| CHEMBL289969  | CC(C)Nc1ccnc1N2CCN(CC2)C(=O)c3cc4ccccc4[nH]3                                                                   | 1200    | nM |
| CHEMBL292339  | C[C@@H](\N=C/S)\Nc1ccc(Cl)en1)c2ccccc2                                                                         | 1200    | nM |
| CHEMBL294743  | C[C@@H](\N=C/S)\Nc1ccc(Br)en1)C2CCCC2                                                                          | 1200    | nM |
| CHEMBL322898  | CCC(C)Sc1nc(O)cc(Cc2ccc(cc2)[N+](=O)[O-])n1                                                                    | 1200    | nM |
| CHEMBL112886  | CCC(C)Sc1nc(O)cc(Cc2cccc(C)c2)n1                                                                               | 1200    | nM |
| CHEMBL114598  | Br1ccc(NC(=S)NCCc2occc2)nc1                                                                                    | 1200    | nM |
| CHEMBL145287  | CCN1c2ncccc2C(=O)N(C)c3ccc(nc13)c4ccc(OC)nc4                                                                   | 1200    | nM |
| CHEMBL145897  | S=C(NCc1ccccc1)Nc2nccs2                                                                                        | 1200    | nM |
| CHEMBL215542  | COC(=O)CCC\C=C(\c1ccc(cc1)C#N)/c2cc(C)c3OC(=O)N(C)c3c2                                                         | 1200    | nM |
| CHEMBL96328   | FC(F)(F)Oc1ccc2NC(=O)OC(C#CC3CC3)(c2c1)C(F)(F)F                                                                | 1249    | nM |
| CHEMBL291113  | O=C1Nc2c(ccnc2N(C3CC3)c4ncccc14)C#N                                                                            | 1250    | nM |
| CHEMBL85945   | CCc1cc(NCc2cccc(OC)c2)c(O)nc1C                                                                                 | 1250    | nM |
| CHEMBL124186  | CCc1cc(NCc2oc3cc(F)ccc3n2)c(O)nc1C                                                                             | 1250    | nM |
| CHEMBL338658  | CCc1cc(NCc2oc3ccc(C)cc3n2)c(O)nc1C                                                                             | 1250    | nM |
| CHEMBL175089  | CCc1cc(CNc2oc3ccccc3n2)c(O)nc1C                                                                                | 1250    | nM |
| CHEMBL208008  | Cc1cc(C)c(c(C)c1)n2nnnc2SCC(=O)Nc3ccc(cc3)S(=O)(=O)N                                                           | 1252    | nM |
| CHEMBL443996  | Fc1ccccc1CO[C@H]2C(=O)Nc3ccc(Cl)cc3[C@@]2(C#CC4CC4)C(F)(F)F                                                    | 1296    | nM |
| CHEMBL289304  | COc1ccc2cc([nH]c2c1)C(=O)N3CCN(CC3)c4ncccc4NC(C)C                                                              | 1300    | nM |
| CHEMBL38068   | CC(C)Nc1ccnc1N2CCN(CC2)C(=O)c3cc4ccc(O)ccc4[nH]3                                                               | 1300    | nM |
| CHEMBL298243  | CCN1c2ccnc2N(C)C(=O)c3ccccc13                                                                                  | 1300    | nM |
| CHEMBL86178   | CCc1cc(NCc2c(C)cccc2OC)c(O)nc1C                                                                                | 1300    | nM |
| CHEMBL338415  | Cc1nc(CCCCCC(=O)c2ccccc2)n3nc(ccc13)n4nccn4                                                                    | 1300    | nM |
| CHEMBL433925  | CCOCc1ccnc2N(C3CC3)c4ncccc4C(=O)Nc12                                                                           | 1300    | nM |
| CHEMBL2115326 | CCN1c2ncccc2N(C)C(=O)c3cc(Br)nc13                                                                              | 1300    | nM |
| CHEMBL338339  | Cc1nc(CCCCCOC(=O)c2ccccc2)n3nc(Cl)ccc13                                                                        | 1319.85 | nM |
| CHEMBL105630  | CCc1cc(c(O)nc1C)C(OCc2ccccc2)(C#CC3CC3)C(F)(F)F                                                                | 1348    | nM |
| CHEMBL313481  | O=C1N2CCSC2(c3occc3)c4ccccc14                                                                                  | 1350    | nM |
| CHEMBL330537  | Clc1ccc(NC(=S)NCCC2=CCCC2)nc1                                                                                  | 1360.15 | nM |
| CHEMBL71766   | CCN1c2ncccc2N(C)C(=O)c3cc(Cl)nc13                                                                              | 1374.77 | nM |
| CHEMBL38129   | CC(C)Nc1ccnc1N2CCN(CC2)C(=O)c3cc4ccc(C=O)cc4[nH]3                                                              | 1400    | nM |
| CHEMBL41458   | Cc1ncc([N+](=O)[O-])n1CCOC(c2ccccc2)c3ccc(Cl)cc3Cl                                                             | 1400    | nM |
| CHEMBL302866  | C[C@@H](\N=C/S)\Nc1ccc(Cl)en1)C2CCCC2                                                                          | 1400    | nM |
| CHEMBL72535   | C=CCN1C(=O)c2ccccc2Nc3ccccc13                                                                                  | 1400    | nM |
| CHEMBL314925  | CCC(c1cc(O)nc(SC2CCCC2)n1)c3ccccc4ccccc34                                                                      | 1400    | nM |
| CHEMBL86261   | CCc1cc(NCc2ccccc2F)c(O)nc1C                                                                                    | 1400    | nM |

|               |                                                                                                           |         |    |
|---------------|-----------------------------------------------------------------------------------------------------------|---------|----|
| CHEMBL144794  | CCN1c2neccc2C(=O)N(C)c3ccc(nc13)c4ccc(OC)cc4<br>CC(C)Oc1ccnc1N(C)C2CCN(CC2)C(=O)c3cc4cc(NS(=O))(=O)C)ccc4 | 1400    | nM |
| CHEMBL151955  | [nH]3                                                                                                     | 1400    | nM |
| CHEMBL176814  | CCc1cc([S+])([O-])Cc2oc3c(Cl)ccc(Cl)c3n2)c(O)nc1C                                                         | 1400    | nM |
| CHEMBL320056  | CCOC(=O)CSc1nc(O)c(C(C)C)c(Cc2cccc3ccccc23)n1                                                             | 1410    | nM |
| CHEMBL358782  | C=CCOCc1ccnc2N(C3CC3)c4neccc4C(=O)Nc12<br>FC(F)(F)[C@@]1(C#CC2CC2)[C@@H](OCC3CC3)C(=O)Nc4ccc(Cl)          | 1410    | nM |
| CHEMBL58408   | cc14                                                                                                      | 1434    | nM |
| CHEMBL86215   | [O-][S+]1CCN2C(=O)c3ccccc3C12c4ccccc4                                                                     | 1450    | nM |
| CHEMBL85829   | CCc1cc(NCc2ccccc2Cl)c(O)nc1C<br>Nc1cccc(CO[C@H]2C(=O)Nc3ccc(Cl)cc3[C@@]2(C#CC4CC4)C(F)(F)                 | 1450    | nM |
| CHEMBL292468  | )Fc1                                                                                                      | 1455    | nM |
| CHEMBL112949  | Cc1c(O)nc(SC2CCCC2)nc1Cc3ccccc3                                                                           | 1466.29 | nM |
| CHEMBL83524   | Clc1cccc(c1)C23SCCN2C(=O)c4ccccc34                                                                        | 1469.69 | nM |
| CHEMBL1807340 | Cc1cccc2nc(c(NC3CCCC3)n12)c4ccccc4C1                                                                      | 1488.79 | nM |
| CHEMBL41119   | Cc1ncc([N+](=O)[O-])n1CCOC(c2ccccc2)c3ccc(cc3)C(C)(C)C                                                    | 1500    | nM |
| CHEMBL309696  | Clc1ccc2NC(=O)NC(C#Cc3enenc3)(C4CC4)c2c1                                                                  | 1500    | nM |
| CHEMBL87284   | CCc1cc(NCc2ccccc2SC)c(O)nc1C                                                                              | 1500    | nM |
| CHEMBL318343  | CCN1c2ncc(Cc3ccnc(c3)C(=O)O)cc2C(=O)N(C)c4ccc(Cl)nc14                                                     | 1500    | nM |
| CHEMBL317866  | CN(\C(=N\CCc1ccccc1)\S)c2nccs2                                                                            | 1500    | nM |
| CHEMBL156208  | CC(C)Sc1nc(O)cc(Cc2c(Cl)cccc2Cl)n1                                                                        | 1500    | nM |
| CHEMBL160781  | CCC(C)Sc1nc(O)c(C)c(Cc2cccc(F)c2)n1                                                                       | 1500    | nM |
| CHEMBL315689  | CCc1cc(NCc2neccc2OC)c(O)nc1C<br>FC(F)(F)[C@@]1(C#CC2CC2)[C@@H](OCc3ccccc3)C(=O)Nc4ccc(C                   | 1550    | nM |
| CHEMBL291970  | )cc14                                                                                                     | 1572    | nM |
| CHEMBL58607   | Cc1cccc2c1nc(c3c(F)cccc3F)n2Cc4ccccc4                                                                     | 1600    | nM |
| CHEMBL432526  | C[C@@H](\N=C/S)\Nc1ccc(Br)cn1)c2ccccc2                                                                    | 1600    | nM |
| CHEMBL157349  | CCC(C)Sc1nc(O)cc(Cc2ccccc2Cl)n1                                                                           | 1600    | nM |
| CHEMBL111153  | CCC(C)Sc1nc(O)cc(Cc2ccccc2)n1                                                                             | 1643.17 | nM |
| CHEMBL313366  | Cc1cccc(c1C)C23SCCN2C(=O)c4ccccc34                                                                        | 1650    | nM |
| CHEMBL125504  | CCc1cc(NCc2oc3cc(C)ccc3n2)c(O)nc1C                                                                        | 1650    | nM |
| CHEMBL175531  | CCc1cc(CCc2oc3ccc(F)cc3n2)c(O)nc1C                                                                        | 1700    | nM |
| CHEMBL195108  | OC(=O)c1ccccc1C(=O)NCCO\C(=N/c2ccc(I)cc2)\S                                                               | 1700    | nM |
| CHEMBL284241  | Cc1cccc(Cc2nc(SC3CCCC3)nc(O)c2C)c1                                                                        | 1749.29 | nM |
| CHEMBL123966  | CCOC(=O)c1cc(NCc2oc3ccccc3n2)c(O)nc1C                                                                     | 1750    | nM |
| CHEMBL46961   | C[C@H]1CN2C(=S)Nc3cccc(CN1CC=C(C)C)c23                                                                    | 1754.99 | nM |
| CHEMBL2115322 | CCN1c2ccc(C)nc2N(C)C(=O)c3ccnc13<br>Fc1cccc(CO[C@H]2C(=O)Nc3ccc(Cl)cc3[C@@]2(C#CC4CC4)C(F)(F)             | 1760    | nM |
| CHEMBL59059   | )Fc1                                                                                                      | 1776    | nM |
| CHEMBL36835   | CC(C)Nc1ccnc1N2CCN(CC2)C(=O)c3cc4cc(NC(=O)C)ccc4[nH]3                                                     | 1800    | nM |
| CHEMBL323573  | CCC(C)Sc1nc(O)c(C)c(Cc2ccc(cc2)[N+](=O)[O-])n1                                                            | 1800    | nM |
| CHEMBL356163  | CC(C)Oc1ccnc1N2CCN(CC2)C(=O)c3cc4ccccc4[nH]3                                                              | 1800    | nM |
| CHEMBL49030   | FC(F)(F)C1(C#CC2CC2)N(CC#C)c3ccccc3NC1=O                                                                  | 1807    | nM |
| CHEMBL84717   | O=C1N2CCSC2(c3ccccc3)C#N)c4ccccc14                                                                        | 1810    | nM |
| CHEMBL301996  | FC(F)(F)C1(C#CC2CC2)N(Cc3ccccc3)c4ccccc4NC1=O                                                             | 1818    | nM |
| CHEMBL106659  | CCc1cc(c(O)nc1C)C(OCC#N)(C#CC2CC2)C(F)(F)F                                                                | 1842    | nM |
| CHEMBL177192  | CN(C)c1cc(CCc2oc3ccccc3n2)c(O)nc1C                                                                        | 1850    | nM |
| CHEMBL289429  | CCN1c2neccc2C(=O)N(C)c3c(C)ccnc13                                                                         | 1900    | nM |
| CHEMBL73672   | CCN1c2nccc(CC)c2NC(=O)c3ccnc13                                                                            | 1900    | nM |
| CHEMBL124838  | CCc1cc(NCc2oc3ccccc3n2)c(O)nc1C                                                                           | 1900    | nM |
| CHEMBL144130  | Cn1cccc1CC\N=C(S)\Nc2nccs2                                                                                | 1900    | nM |

|              |                                                                                                                        |         |    |
|--------------|------------------------------------------------------------------------------------------------------------------------|---------|----|
| CHEMBL144420 | S=C(NCCc1ccccc1)Nc2nncs2                                                                                               | 1900    | nM |
| CHEMBL151173 | CCOc1ccnc1N2CCN(CC2)C(=O)c3cc4cc(NS(=O)(=O)C)ccc4[nH]3                                                                 | 1900    | nM |
| CHEMBL422001 | CCC(C)Sc1nc(O)cc(Cc2cccc(Cl)c2)n1                                                                                      | 1900    | nM |
| CHEMBL96591  | FC(F)(F)C1(OC(=O)Nc2cc3ccccc3cc12)C#CC4CC4<br>CCOC(=O)NCCC=C(c1cc(Cl)c(OC)c(c1)C(=O)OC)c2cc(Cl)c(OC)c(c2)<br>C(=O)OC   | 1909    | nM |
| CHEMBL335037 | CCc1cc(NCc2oc3ccccc3c2C)c(O)nc1C                                                                                       | 1930    | nM |
| CHEMBL125120 | CCc1cc(e(O)nc1C)C(OCc2e(F)cccc2OC)(C#CC3CC3)C(F)(F)F                                                                   | 1950    | nM |
| CHEMBL321786 | CC(C)c1ccc2NC(=O)OC(C#CC3CC3)(c2c1)C(F)(F)F                                                                            | 1951    | nM |
| CHEMBL94541  | CCNC(=O)OCCCCC=C(c1cc(Cl)c(OC)c(c1)C(=O)OC)c2cc(Cl)c(OC)c<br>(c2)C(=O)OC                                               | 1958    | nM |
| CHEMBL357658 | COc1cccc(c1)C23SCCN2C(=O)c4ccccc34                                                                                     | 1959.59 | nM |
| CHEMBL316151 | OC1(CC1)C#CC2(OC(=O)Nc3ccc(Cl)cc23)C(F)(F)F                                                                            | 1969.77 | nM |
| CHEMBL155936 | CCNc1ccnc1N2CCN(CC2)C(=O)c3cc4cc(O)ccc4[nH]3                                                                           | 1983    | nM |
| CHEMBL36656  | CCc1nc(CCCCCC(=O)c2ccccc2)n3nc(Cl)ccc13                                                                                | 2000    | nM |
| CHEMBL123514 | CC(C)Oc1ccnc1N(C)C2CCN(CC2)C(=O)c3cc4ccccc4[nH]3                                                                       | 2000    | nM |
| CHEMBL358754 | CC(C)Nc1ccnc1N(C)C2CCN(CC2)C(=O)c3cc4ccccc4[nH]3                                                                       | 2000    | nM |
| CHEMBL151565 | Clc1ccc(cc1)N(C(=S)OCCN2C(=O)c3ccccc3C2=O)C(=O)c4ccnc(Cl)c4                                                            | 2000    | nM |
| CHEMBL166126 | COc1ccc(cc1OC2CCCC2)[C@@H]3CN(C(=O)C3)c4cccc(N)c4<br>COC(=O)CCC\C=C(/c1cc(C)c(OC)c(c1)C(=O)OC)\c2cc(C)c3ON(C)C(=O)c3c2 | 2000    | nM |
| CHEMBL212394 | Cc1nc(CCCCCC(=O)c2ccccc2)n3nc(Cl)ccc13                                                                                 | 2000    | nM |
| CHEMBL126811 | Cc1ccc(cc1)C(OCCn2c(C)nc2[N+](=O)[O-])c3ccccc3                                                                         | 2007.98 | nM |
| CHEMBL38744  | CCN1c2ccc(OC)cc2N(C)C(=O)c3ccnc13                                                                                      | 2100    | nM |
| CHEMBL71310  | CC(C)c1cccc(c1)C23SCCN2C(=O)c4ccccc34                                                                                  | 2100    | nM |
| CHEMBL440879 | CC(c1ccccc1)c2cc(O)nc(SC3CCCC3)n2                                                                                      | 2100    | nM |
| CHEMBL315287 | CCOc1ccnc1N2CCN(CC2)C(=O)c3cc4ccccc4[nH]3                                                                              | 2100    | nM |
| CHEMBL356173 | COCc1cc(CCc2oc3ccccc3n2)c(O)nc1C                                                                                       | 2100    | nM |
| CHEMBL177174 | CCN1c2neccc2c3ncc(C)n3c4ccc(nc14)N5CCCC5                                                                               | 2186.09 | nM |
| CHEMBL301109 | CCN1c2neccc2c3nccn3c4ccc(nc14)N(C)C                                                                                    | 2190    | nM |
| CHEMBL43324  | Oc1cc(Cc2ccccc2)nc(SC3CCCC3)n1                                                                                         | 2190.89 | nM |
| CHEMBL114292 | CC(C)Nc1ccnc1N2CCN(CC2)C(=O)c3cc4ccc(OS(=O)(=O)C)cc4[nH]3<br>3                                                         | 2200    | nM |
| CHEMBL36776  | CCCN1C(=S)c2ccccc2Oc3ccccc13                                                                                           | 2200    | nM |
| CHEMBL299002 | O=C1N2CCCSC2(c3ccccc3)c4ccccc14                                                                                        | 2200    | nM |
| CHEMBL312172 | CCc1cc(NCc2ccccc2C)c(O)nc1C                                                                                            | 2200    | nM |
| CHEMBL85830  | CC(C)CSc1nc(O)c(C)c(Cc2ccccc2)n1                                                                                       | 2200    | nM |
| CHEMBL322539 | O=C1Nc2e(Cn3cccn3)ccnc2N(C4CC4)c5neccc15                                                                               | 2200    | nM |
| CHEMBL145272 | COC(=O)CC=C(c1cc(Cl)c(OC)c(c1)C(=O)OC)c2cc(Cl)c(OC)c(c2)C(=O)OC                                                        | 2200    | nM |
| CHEMBL343149 | CCNc1ccnc1N(C)C2CCN(CC2)C(=O)c3cc4ccccc4[nH]3                                                                          | 2200    | nM |
| CHEMBL424141 | Cc1cccc(n1)N2C(SCC2=O)c3c(Cl)cccc3Cl                                                                                   | 2240    | nM |
| CHEMBL48427  | Cc1ncc([N+](=O)[O-])n1CCOC(c2ccccc2)c3ccc(F)cc3                                                                        | 2300    | nM |
| CHEMBL43348  | CC(C)Sc1nc(O)cc(n1)C(C)c2ccccc2                                                                                        | 2300    | nM |
| CHEMBL85368  | CCC(c1ccccc1)c2cc(O)nc(SC(C)C)n2                                                                                       | 2300    | nM |
| CHEMBL87569  | Cc1nc(CCCCCOCc2ccccc2)n3nc(Cl)ccc13                                                                                    | 2300    | nM |
| CHEMBL435216 | Clc1ccc(cc1)N(C(=S)OCCN2C(=O)c3ccccc3C2=O)C(=O)c4occc4                                                                 | 2300    | nM |
| CHEMBL355113 | Oc1cc(Cl)cc2c1NC(=O)O[C@]2(C#CC3CC3)C(F)(F)F                                                                           | 2341    | nM |
| CHEMBL1309   | CCc1cc(NCc2oc(en2)c3ccccc3)c(O)nc1C                                                                                    | 2350    | nM |
| CHEMBL125052 | COC(=O)NCCC=C(c1cc(Br)c(OC)c(c1)C(=O)OC)c2cc(Br)c(OC)c(c2)<br>C(=O)OC                                                  | 2390    | nM |
| CHEMBL132489 | Clc1nc(NC(=S)NCCc2ccccc2)s1                                                                                            | 2400    | nM |
| CHEMBL101348 |                                                                                                                        |         |    |

|               |                                                                                                                 |         |    |
|---------------|-----------------------------------------------------------------------------------------------------------------|---------|----|
| CHEMBL342794  | Cc1cccc(OCc2ccnc3N(C4CC4)c5ncccc5C(=O)Nc23)c1                                                                   | 2430    | nM |
| CHEMBL346356  | Oc1cc2NC(=O)OC(C#CC3CC3)(c2cc1Cl)C(F)(F)F                                                                       | 2450    | nM |
| CHEMBL173529  | CCc1cc(CCc2ccc3ccccc3n2)c(O)nc1C                                                                                | 2450    | nM |
| CHEMBL49334   | CCN1c2ncccc2c3ncc(CC)n3c4ccccc14                                                                                | 2488.57 | nM |
| CHEMBL415871  | COC(=O)Nc1ccc2[nH]c(cc2c1)C(=O)N3CCN(CC3)c4ncccc4NC(C)C                                                         | 2500    | nM |
| CHEMBL301449  | CC(C)c1ccc(cc1)S(=O)(=O)n2ccc(c2)C(O)c3ccc(Cl)cc3Cl                                                             | 2500    | nM |
| CHEMBL109551  | CC(C)Sc1nc(O)c(C)c(Cc2cccc(C)c2)n1                                                                              | 2500    | nM |
| CHEMBL110007  | CSc1nc(O)c(C)c(Cc2cccc(C)c2)n1                                                                                  | 2500    | nM |
| CHEMBL110857  | CC(C)Sc1nc(O)c(C)c(Cc2cccc2)n1                                                                                  | 2500    | nM |
| CHEMBL123202  | Cc1nc(CCCCCC(=O)c2cccc2)n3nc(ccc13)n4ccnc4C                                                                     | 2500    | nM |
| CHEMBL338826  | CCc1cc(NCc2nc(O)c3ccccc3n2)c(O)nc1C                                                                             | 2500    | nM |
| CHEMBL350396  | Clc1ccc(cc1)N(C(=S)OCCN2C(=O)c3ccccc3C2=O)C(=O)c4cccs4                                                          | 2500    | nM |
| CHEMBL197069  | CC(C)C(=O)c1c(O)c(CC=C(C)C)c2OC(=O)C=C(c3ccccc3)c2c1O                                                           | 2500    | nM |
| CHEMBL254840  | CCCCc1esc(NC(=S)NCCc2cccc2)n1                                                                                   | 2500    | nM |
| CHEMBL31455   | FC(F)(F)C1(OCC(=O)Nc2ccc(Cl)cc12)C#Cc3ccc3                                                                      | 2510    | nM |
| CHEMBL151716  | Oc1ccc(CCOc(=O)c2cc(O)c(O)c(O)c2)cc1O                                                                           | 2533.77 | nM |
| CHEMBL110008  | Cc1cccc(Cc2cc(O)nc(SC3CCCC3)n2)c1                                                                               | 2600    | nM |
| CHEMBL126216  | Cc1nc(CCCCCC(=O)c2cccc2)n3nc(ccc13)n4cnnc4                                                                      | 2600    | nM |
| CHEMBL293498  | C[C@H]1CN2C(=S)Nc3cc(Cl)cc(CN1CC=C(C)C)c23                                                                      | 2607.68 | nM |
| CHEMBL85312   | O=C1N2CCSC2(c3cccs3)c4ccccc14                                                                                   | 2650    | nM |
| CHEMBL105826  | CCc1cc(c(O)nc1C)C(OCc2ccc(Cl)cc2Cl)(C#CC3CC3)C(F)(F)F                                                           | 2696    | nM |
| CHEMBL32469   | CCC(C)Sc1nc(O)c(C)c(Cc2cccc(C)c2)n1                                                                             | 2700    | nM |
| CHEMBL124328  | CCc1cc(NCc2oc3ccc4ccccc4c3n2)c(O)nc1C                                                                           | 2700    | nM |
| CHEMBL151192  | CCNc1ccnc1N2CCN(CC2)C(=O)c3cc4cc(NS(=O)(=O)C)ccc4[nH]3                                                          | 2700    | nM |
| CHEMBL297115  | CCN1c2ncccc2c3nc(C)cn3c4ccccc14                                                                                 | 2750    | nM |
| CHEMBL49441   | CCN1c2ncccc2c3nccn3c4ccc(nc14)N5CCCC5                                                                           | 2792.85 | nM |
| CHEMBL50019   | Cc1ccnc(c1)N2C(SCC2=O)c3c(F)cccc3F                                                                              | 2840    | nM |
| CHEMBL124946  | Cc1cc(C)c(NCc2oc3c(Cl)ccc(Cl)c3n2)c(O)n1                                                                        | 2850    | nM |
| CHEMBL359315  | Cc1cccc(n1)N2C(SCC2=O)c3c(C)cccc3F                                                                              | 2850    | nM |
| CHEMBL393003  | Fe1cccc(F)c1CN2C(=O)Nc3ccc(Cl)cc23                                                                              | 2860    | nM |
| CHEMBL347244  | Cc1c(O)nc(SC2CCCC2)nc1Cc3c(Cl)cccc3Cl                                                                           | 2886.17 | nM |
| CHEMBL37722   | CN1C(=O)c2ccccc2N(CCF)c3ncccc13                                                                                 | 2900    | nM |
| CHEMBL296589  | Cc1cccc(n1)N2C(SCC2=O)c3c(F)cccc3F                                                                              | 2900    | nM |
| CHEMBL306079  | CCN1c2cccc2N(C)C(=O)c3ccc(F)nc13                                                                                | 2900    | nM |
| CHEMBL111368  | CC(C)Sc1nc(O)cc(Cc2cccc(C)c2)n1                                                                                 | 2900    | nM |
| CHEMBL3143764 | COCCN1C(=O)N(C=C(C)C1=O)[C@@H]2O[C@H](CO[Si](C)(C)C(C)(C)C)[C@@]3(OS(=O)(=O)C=C3N)[C@H]2O[Si](C)(C)C(C)(C)C     | 2900    | nM |
| CHEMBL313212  | [O-][N+](=O)c1cccc(c1)C23SCCN2C(=O)c4ccccc34                                                                    | 2932.58 | nM |
| CHEMBL48637   | CCN1c2ncccc2c3nccn3c4ccccc14                                                                                    | 2946.18 | nM |
| CHEMBL133393  | COC(=O)c1cc(cc(C)c1OC)C(=CCNC(=O)OCC(C)C)c2cc(C)c(OC)c(c2)C(=O)OC                                               | 2950    | nM |
| CHEMBL39343   | OCc1ccnc2N(C3CC3)c4ncccc4C(=O)Nc12                                                                              | 3000    | nM |
| CHEMBL99844   | CCN1c2ncccc2N(C)C(=O)c3ccc(\C=C\c4ccccc4)cnc13                                                                  | 3000    | nM |
| CHEMBL338823  | Cc1nc(CCCCCC(=O)c2cccc2)n3nc(N)ccc13                                                                            | 3000    | nM |
| CHEMBL345252  | CC(=O)NC1=CC(=O)c2ccc(nc2C1=O)c3[nH]c(cc4c5ccccc5nc34)C(=O)OCCOP(=O)(O)O                                        | 3000    | nM |
| CHEMBL156109  | CSc1nc(O)cc(Cc2c(Cl)cccc2Cl)n1                                                                                  | 3000    | nM |
| CHEMBL3143760 | COC(=O)CN1C(=O)N(C=C(C)C1=O)[C@@H]2O[C@H](CO[Si](C)(C)(C)C(C)C)[C@@]3(OS(=O)(=O)C=C3N)[C@H]2O[Si](C)(C)C(C)(C)C | 3000    | nM |
| CHEMBL144476  | Clc1cccc1OCc2ccnc3N(C4CC4)c5ncccc5C(=O)Nc23                                                                     | 3050    | nM |



|               |                                                                                                                                                                                                                                     |         |    |
|---------------|-------------------------------------------------------------------------------------------------------------------------------------------------------------------------------------------------------------------------------------|---------|----|
| CHEMBL338435  | CN(C1CCN(CC1)C(=O)c2cc3cc(NS(=O)(=O)C)ccc3[nH]2)c4ncccc4N<br>C(C)(C)C                                                                                                                                                               | 3100    | nM |
| CHEMBL211582  | CN1C(=O)N(C=C(C)C1=O)[C@@H]2O[C@H](CO[Si](C)(C)C(C)(C)<br>C)[C@@]3(OS(=O)(=O)C=C3N)[C@H]2O[Si](C)(C)C(C)(C)C                                                                                                                        | 3100    | nM |
| CHEMBL3143768 | CC1=CN([C@H]2O[C@H](CO[Si](C)(C)C(C)(C)C)[C@@]3(OS(=O)(=O)C=C3N)[C@H]2O[Si](C)(C)C(C)(C)C(=O)N(CCO)C1=O<br>CNC(=O)CN1C(=O)N(C=C(C)C1=O)[C@@H]2O[C@H](CO[Si](C)(C)<br>)C(C)(C)C)[C@@]3(OS(=O)(=O)C=C3N)[C@H]2O[Si](C)(C)C(C)(C)<br>C | 3100    | nM |
| CHEMBL3143792 | C                                                                                                                                                                                                                                   | 3100    | nM |
| CHEMBL63497   | CCCCC=C(c1ccc(OC)c(c1)C(=O)OC)c2ccc(OC)c(c2)C(=O)OC                                                                                                                                                                                 | 3200    | nM |
| CHEMBL147224  | CCOc1cccnc1N(C)C2CCN(CC2)C(=O)c3cc4ccccc4[nH]3                                                                                                                                                                                      | 3200    | nM |
| CHEMBL32460   | FC(F)(F)C1(OCC(=O)Nc2ccc(Cl)cc12)C#Cc3ccccc3                                                                                                                                                                                        | 3300    | nM |
| CHEMBL305840  | CCN1C(=O)c2ccccc2N(C)c3nc(Cl)ccc13                                                                                                                                                                                                  | 3300    | nM |
| CHEMBL310070  | O=C1N2CCS[C@@]2(c3ccccc3)c4ccccc14                                                                                                                                                                                                  | 3329.86 | nM |
| CHEMBL124271  | CNc1ccc2c(C)nc(CCCCCC(=O)c3ccccc3)n2n1                                                                                                                                                                                              | 3400    | nM |
| CHEMBL338302  | Cc1nc(CCCCCC(=O)c2ccccc2)n3nc(ccc13)n4cccn4<br>CCOc1cccnc1N(C)C2CCN(CC2)C(=O)c3cc4cc(NS(=O)(=O)C)ccc4[nH]<br>]3                                                                                                                     | 3400    | nM |
| CHEMBL151316  | Cc1nc(O)c(Cc2oc3ccccc3n2)cc1CO                                                                                                                                                                                                      | 3400    | nM |
| CHEMBL367204  | O=C1N2CCSC2(c3ccccc3)c4ncccc14                                                                                                                                                                                                      | 3450    | nM |
| CHEMBL84486   | Clc1ccccc1c2nc3cccc(C#N)n3c2NC4CCCCC4                                                                                                                                                                                               | 3470    | nM |
| CHEMBL1807342 | Clc1ccccc1c2nc3cccc(C#N)n3c2NC4CCCCC4                                                                                                                                                                                               | 3470    | nM |
| CHEMBL313676  | S=C1N2CCSC2(c3ccccc3)c4ccccc14                                                                                                                                                                                                      | 3500    | nM |
| CHEMBL3143793 | CN(C)C(=O)CN1C(=O)N(C=C(C)C1=O)[C@@H]2O[C@H](CO[Si](C)<br>(C)C(C)(C)C)[C@@]3(OS(=O)(=O)C=C3N)[C@H]2O[Si](C)(C)C(C)<br>(C)C                                                                                                          | 3500    | nM |
| CHEMBL53554   | Fe1cccc(F)c1C2SCc3nc4ccccc4n23                                                                                                                                                                                                      | 3505    | nM |
| CHEMBL63150   | COC(=O)c1cc(cc(Cl)c1OC)C(=CCCCO)c2cc(Cl)c(OC)c(c2)C(=O)OC                                                                                                                                                                           | 3600    | nM |
| CHEMBL82439   | CCc1cc(CCN2C(=O)c3ccccc3C2=O)c(O)nc1C                                                                                                                                                                                               | 3700    | nM |
| CHEMBL86062   | CCC(c1ccccc1)c2cc(O)nc(SC3CCCCC3)n2                                                                                                                                                                                                 | 3700    | nM |
| CHEMBL358555  | CCN1c2nc(ccc2N(C)C(=O)c3ccccc13)c4enc[nH]4<br>CC1=CN([C@H]2O[C@H](CO[Si](C)(C)C(C)(C)C)[C@@]3(OS(=O)(=O)C=C3N)[C@H]2O[Si](C)(C)C(C)(C)C(=O)N(CCCOP(=O)(O)<br>)C(=O)O)C1=O                                                           | 3700    | nM |
| CHEMBL3142918 | )C(=O)O)C1=O                                                                                                                                                                                                                        | 3700    | nM |
| CHEMBL84821   | CCc1cc(NCc2cccc(C)c2OC)c(O)nc1C                                                                                                                                                                                                     | 3800    | nM |
| CHEMBL177271  | CCc1cc(CCc2oc3c(F)ccc(F)c3n2)c(O)nc1C<br>CC(C)[C@H](N)C(=O)NCC(=O)NCCCN1C(=O)N(C=C(C)C1=O)C2O<br>C(CO[Si](C)(C)C(C)(C)C)C3(OS(=O)(=O)C=C3N)C2O[Si](C)(C)C(C)<br>(C)C                                                                | 3800    | nM |
| CHEMBL263515  | CC1=CN([C@H]2O[C@H](CO[Si](C)(C)C(C)(C)C)[C@@]3(OS(=O)(=O)C=C3N)[C@H]2O[Si](C)(C)C(C)(C)C(=O)N(CCCOP(=O)(O)<br>)C(=O)OCc4ccccc4)C1=O                                                                                                | 3800    | nM |
| CHEMBL3142919 | )C(=O)OCc4ccccc4)C1=O                                                                                                                                                                                                               | 3800    | nM |
| CHEMBL107899  | CCc1cc(c(O)nc1C)C(OCc2cc(OC)cc(OC)c2)(C#CC3CC3)C(F)(F)F                                                                                                                                                                             | 3843    | nM |
| CHEMBL38088   | CC(C)Nc1cccnc1N2CCN(CC2)C(=O)c3cc4ccc(cc4[nH]3)C#N                                                                                                                                                                                  | 3900    | nM |
| CHEMBL320902  | S=C(NCCc1ccccc1)Nc2cncn2                                                                                                                                                                                                            | 3900    | nM |
| CHEMBL332351  | Cc1nc(CCCCCC(=O)Cc2ccccc2)n3nc(Cl)ccc13                                                                                                                                                                                             | 3900    | nM |
| CHEMBL7483    | CCNc1cccnc1N2CCN(CC2)C(=O)c3cc4ccccc4[nH]3                                                                                                                                                                                          | 4000    | nM |
| CHEMBL84260   | Clc1ccc(cc1)C23SCCN2C(=O)c4ccccc34                                                                                                                                                                                                  | 4000    | nM |
| CHEMBL82751   | Clc1ccc(cc1Cl)C23SCCN2C(=O)c4ccccc34                                                                                                                                                                                                | 4000    | nM |
| CHEMBL92810   | FC(F)(F)c1ccc(\N=C(/S)\NCCC2=CCCC2)nc1                                                                                                                                                                                              | 4000    | nM |
| CHEMBL344562  | CCN1c2nc(OC)cc(COc3ccccc3)c2NC(=O)c4ccccc14                                                                                                                                                                                         | 4000    | nM |
| CHEMBL151411  | CCOC(=O)c1cccn1S(=O)(=O)c2cc(C)ccc2N                                                                                                                                                                                                | 4000    | nM |
| CHEMBL213257  | CC1=CN(C2OC(CO[Si](C)(C)C(C)(C)C)C3(OS(=O)(=O)C=C3N)C2O[<br>Si](C)(C)C(C)(C)C)C(=O)N(CCCNC(=O)[C@H]4CCCN4C(=O)[C                                                                                                                    | 4000    | nM |

|               |                                                                                                                                            |         |    |
|---------------|--------------------------------------------------------------------------------------------------------------------------------------------|---------|----|
|               | @@H](N)CC(=O)N)C1=O                                                                                                                        |         |    |
| CHEMBL85783   | Cc1cccc(n1)C23SCCN2C(=O)c4cccc34                                                                                                           | 4100    | nM |
| CHEMBL151152  | Cc1ccnc(c1)N2C(SCC2=O)c3c(F)cccc3Cl                                                                                                        | 4120    | nM |
| CHEMBL150025  | Cc1cc(C)nc(c1)N2C(SCC2=O)c3c(F)cccc3F                                                                                                      | 4120    | nM |
| CHEMBL176587  | CCc1cc(\C=C/c2oc3cccc3n2)c(O)nc1C                                                                                                          | 4207.14 | nM |
| CHEMBL417331  | CC(C)Nc1ccnc1N2CCN(CC2)C(=O)c3cc4cc(OCc5cccc5)ccc4[nH]3                                                                                    | 4300    | nM |
| CHEMBL58711   | C[C@H]1CN2C(=S)Nc3ccc(Cl)c(CN1CC=C(C)C)c23                                                                                                 | 4300    | nM |
| CHEMBL108944  | CC(C)SC1=N\C(=C\c2cccc2)\C(C)(C)C(=O)N1                                                                                                    | 4300    | nM |
| CHEMBL320735  | CCC(C)SC1=N\C(=C\c2cccc2)\C(C)(C)C(=O)N1                                                                                                   | 4300    | nM |
| CHEMBL87799   | FC(F)(F)c1cccc(c1)C23SCCN2C(=O)c4cccc34                                                                                                    | 4311.03 | nM |
| CHEMBL1807345 | Clc1cccc1c2nc3cccc(Cl)n3c2NC4CCCC4                                                                                                         | 4384.47 | nM |
| CHEMBL1807291 | Clc1cccc1c2nc3cccn3c2NC4CCCC4                                                                                                              | 4390    | nM |
| CHEMBL286325  | CC(C)Nc1ccnc1N2CCN(CC2)C(=O)c3cc4ccc(F)cc4[nH]3                                                                                            | 4400    | nM |
| CHEMBL212339  | CC(C)[C@H](N)C(=O)N1CCC[C@H]1C(=O)N[C@@H](C(C)C)C(=O)NCCC2C(=O)N(C=C(C)C2=O)C3OC(CO[Si](C)(C)C(C)C)C4(OS(=O)(=O)C=C4N)C3O[Si](C)(C)C(C)C)C | 4400    | nM |
| CHEMBL133678  | COC(=O)NCCC=C(c1cc(Cl)c(OC)c(c1)C(=O)OC)c2cc(Cl)c(OC)c(c2)C(=O)OC                                                                          | 4430    | nM |
| CHEMBL63515   | COC(=O)c1cc(cc(Cl)c1OC)C(=CCCN=[N+]=[N-])c2cc(Cl)c(OC)c(c2)C(=O)OC                                                                         | 4449.72 | nM |
| CHEMBL82461   | Clc1cc2C(=O)N3CCSC3(c4cccc4)c2cc1Cl                                                                                                        | 4480    | nM |
| CHEMBL107562  | COC(=O)CSc1nc(O)c(C(C)C)c(Cc2cccc3cccc23)n1                                                                                                | 4490    | nM |
| CHEMBL70324   | CCN1c2cc(N)ccc2N(C)C(=O)c3ccnc13                                                                                                           | 4500    | nM |
| CHEMBL145260  | S=C(NCCCc1cccc1)Nc2nccs2                                                                                                                   | 4500    | nM |
| CHEMBL343398  | COC(=O)c1cc(cc(Cl)c1OC)C(=CCCC=O)c2cc(Cl)c(OC)c(c2)C(=O)OC                                                                                 | 4536.52 | nM |
| CHEMBL86268   | Ne1cccc(c1)C23SCCN2C(=O)c4cccc34                                                                                                           | 4549.73 | nM |
| CHEMBL144654  | COC(=O)c1cc(cc(Cl)c1OC)C(=CCCCBr)c2cc(Cl)c(OC)c(c2)C(=O)OC                                                                                 | 4571.65 | nM |
| CHEMBL314103  | Cc1ccnc(c1)C23SCCN2C(=O)c4ccnc34                                                                                                           | 4600    | nM |
| CHEMBL85476   | CCc1cc(NCc2cccc2O)c(O)nc1C                                                                                                                 | 4600    | nM |
| CHEMBL111088  | CC(C)CSC1=N\C(=C\c2cccc2)\C(C)(C)C(=O)N1                                                                                                   | 4600    | nM |
| CHEMBL111118  | CC(C)CSc1nc(O)c(C)c(Cc2cccc(C)c2)n1                                                                                                        | 4600    | nM |
| CHEMBL378037  | CC(C)C[C@H](NC(=O)[C@@H](N)C(C)C)C(=O)NCCC2C(=O)N(C=C(C)C1=O)C2OC(CO[Si](C)(C)C(C)C)C3(OS(=O)(=O)C=C3N)C2O[Si](C)(C)C(C)C)C                | 4600    | nM |
| CHEMBL1807347 | Clc1cccc1c2nc3cccc(Br)n3c2NC4CCCC4                                                                                                         | 4620    | nM |
| CHEMBL58865   | CC(C)C#CC1(NS(=O)(=O)Nc2ccc(Cl)cc12)C3CC3                                                                                                  | 4627    | nM |
| CHEMBL294602  | Cc1ccc(cc1)C(O)c2ccn(c2)S(=O)(=O)c3ccc(C)cc3                                                                                               | 4700    | nM |
| CHEMBL380211  | CC1=CN(C2OC(CO[Si](C)(C)C(C)C)C3(OS(=O)(=O)C=C3N)C2O[Si](C)(C)C(C)C)C(=O)N(CCCNC(=O)[C@@H]4CCCN4C(=O)[C@@H](N)CCCCN)C1=O                   | 4700    | nM |
| CHEMBL3142917 | [Na+].COC(=O)P(=O)([O-])OCCCN1C(=O)N(C=C(C)C1=O)[C@@H]2O[C@H](CO[Si](C)(C)C(C)C)[C@@]3(OS(=O)(=O)C=C3N)[C@H]2O[Si](C)(C)C(C)C)C            | 4700    | nM |
| CHEMBL110328  | CCc1c(O)nc(SCC(=O)OC)nc1Cc2cccc3cccc23                                                                                                     | 4720    | nM |
| CHEMBL313518  | OC(=O)c1cc(Br)ccc1NC(=O)CCCCC(=O)Nc2ccc(Br)cc2C(=O)O                                                                                       | 4757.1  | nM |
| CHEMBL35655   | CSCSc1nc(O)c(C(C)C)c(Cc2ccc(C)cc(C)c2)n1                                                                                                   | 4800    | nM |
| CHEMBL148532  | CC(C)(C)Nc1ccnc1N2CCN(CC2)C(=O)c3cc4cc(NS(=O)(=O)C)ccc4[nH]3                                                                               | 4800    | nM |
| CHEMBL345128  | CCC(C)Sc1nc(O)cc(Cc2ccc(Cl)cc2)n1                                                                                                          | 4800    | nM |
| CHEMBL214795  | CC(C)[C@H](N)C(=O)N1C[C@H](O)[C@H](O)[C@H]1C(=O)NCCC2C(=O)N(C=C(C)C2=O)C3OC(CO[Si](C)(C)C(C)C)C4(OS(=O)(                                   | 4800    | nM |

|               |                                                                                                                                          |         |    |
|---------------|------------------------------------------------------------------------------------------------------------------------------------------|---------|----|
|               | <chem>=O)C=C4N)C3O[Si](C)(C)C(C)(C)C</chem>                                                                                              |         |    |
| CHEMBL151315  | <chem>Oc1cc(O)c2CC(COc2c1)OC(=O)c3cc(O)c(O)c(O)c3</chem>                                                                                 | 4853.86 | nM |
| CHEMBL109721  | <chem>CSc1nc(O)c(C)c(Cc2ccccc2)n1</chem>                                                                                                 | 4900    | nM |
| CHEMBL432812  | <chem>BrC1ccc(NC(=S)NCCN2CCCC2)nc1</chem>                                                                                                | 4900    | nM |
| CHEMBL387370  | <chem>CC1=CN([C@@H]2O[C@H](CO[Si](C)(C)C(C)(C)C)[C@@]3(OS(=O)(=O)C=C3N)[C@H]2O[Si](C)(C)C(C)(C)C)C(=O)N(CCCO)C1=O</chem>                 | 4929.5  | nM |
| CHEMBL130316  | <chem>COC(=O)NCCC=C(c1cc(C)c(OC)c(c1)C(=O)OC)c2cc(C)c(OC)c(c2)C(=O)OC</chem>                                                             | 4930    | nM |
| CHEMBL316094  | <chem>CC1(Sc2ccccc2n3cccc3C1=O)c4ccccc4</chem>                                                                                           | 5000    | nM |
| CHEMBL327832  | <chem>CCC1(CC=C)Oc2ccccc2n3cccc3C1=O</chem>                                                                                              | 5000    | nM |
| CHEMBL151077  | <chem>CCOC(=O)c1cccn1S(=O)(=O)c2cc(C)ccc2[N+](=O)[O-]</chem>                                                                             | 5000    | nM |
| CHEMBL370921  | <chem>Oc1nc2ccc(Cl)cc2n1Cc3ccc4ccccc4c3</chem>                                                                                           | 5200    | nM |
| CHEMBL125213  | <chem>COC(=O)\C=C\CSc1nc(N)cc(Cl)n1</chem>                                                                                               | 5250    | nM |
| CHEMBL1460    | <chem>OC[C@@H]1CC[C@@H](O1)n2cnc3C(=O)NC=Nc23</chem>                                                                                     | 5370    | nM |
| CHEMBL1807339 | <chem>Cc1ccc2nc(c(NC3CCCC3)n2c1)c4ccccc4C1</chem>                                                                                        | 5390    | nM |
| CHEMBL172773  | <chem>CCc1cc(CCC(=O)Nc2ccccc2O)c(O)nc1C</chem>                                                                                           | 5400    | nM |
| CHEMBL383894  | <chem>CC(C)[C@H](N)C(=O)N[C@@H](C)C(=O)NCCCN1C(=O)N(C=C(C)C1=O)C2OC(CO[Si](C)(C)C(C)(C)C)C3(OS(=O)(=O)C=C3N)C2O[Si](C)(C)C(C)(C)C</chem> | 5400    | nM |
| CHEMBL37888   | <chem>CC(C)Nc1cccn1N2CCN(CC2)C(=O)c3cc4cc(OS(=O)(=O)C)ccc4[nH]3</chem>                                                                   | 5500    | nM |
| CHEMBL34542   | <chem>CC(C)Nc1cccn1N2CCN(CC2)C(=O)c3cc4ccc(ccc4[nH]3)N(C)S(=O)(=O)C</chem>                                                               | 5600    | nM |
| CHEMBL40642   | <chem>CSCSc1cc(Cc2ccccc2)c(C(C)C)c(O)n1</chem>                                                                                           | 5600    | nM |
| CHEMBL63982   | <chem>CCCCC1OC1(c2cc(Br)c(OC)c(c2)C(=O)OC)c3cc(Br)c(OC)c(c3)C(=O)OC</chem>                                                               | 5600    | nM |
| CHEMBL130336  | <chem>COC(=O)c1cc(cc(C)c1OC)C(=CCCC(=O)N(C)C)c2cc(C)c(OC)c(c2)C(=O)OC</chem>                                                             | 5650    | nM |
| CHEMBL198201  | <chem>COC(=O)CCC\C=C(/c1cccc(c1)C#N)\c2cc(C)c3onc(OC)c3c2</chem>                                                                         | 5700    | nM |
| CHEMBL288626  | <chem>BrC1ccc(NC(=S)NCN2CCCC2)nc1</chem>                                                                                                 | 5800    | nM |
| CHEMBL58119   | <chem>C[C@H]1Cn2c(S)nc3ccc(F)c(CN1CC=C(C)C)c23</chem>                                                                                    | 5800    | nM |
| CHEMBL86289   | <chem>CC(C)Sc1nc(O)cc(n1)C(C)c2cccc3ccccc23</chem>                                                                                       | 5800    | nM |
| CHEMBL153896  | <chem>CCCCOC(=O)c1cc2c3ccccc3[nH]c2c(n1)c4ccc5C(=O)C=C(NC(=O)CC)C(=O)c5n4</chem>                                                         | 5800    | nM |
| CHEMBL314558  | <chem>O=C1N2CCSC2(c3ccccc3)c4ccccc14</chem>                                                                                              | 5850    | nM |
| CHEMBL147069  | <chem>Oc1ccc(CCOC(=O)c2cc(O)c(O)c(O)c2)cc1</chem>                                                                                        | 5962.38 | nM |
| CHEMBL325757  | <chem>COC(=O)c1cc(cc(Br)c1OC)C(=CCCC#C)c2cc(Br)c(OC)c(c2)C(=O)OC</chem>                                                                  | 6000    | nM |
| CHEMBL104738  | <chem>CCc1cc(c(O)nc1C)C(OCc2c(F)cccc2Cl)(C#CC3CC3)C(F)(F)F</chem>                                                                        | 6093    | nM |
| CHEMBL35755   | <chem>CSCSc1nc(O)c(C(C)C)c(Cc2ccccc2)n1</chem>                                                                                           | 6100    | nM |
| CHEMBL313729  | <chem>O=C1N2CCOC2(c3ccccc3)c4ccccc14</chem>                                                                                              | 6100    | nM |
| CHEMBL111523  | <chem>CSC1=N\C=C\c2ccccc2\C(C)(C)C(=O)N1</chem>                                                                                          | 6100    | nM |
| CHEMBL147336  | <chem>Oc1cc(cc(O)c1O)C(=O)OC2COc3ccccc3C2</chem>                                                                                         | 6100    | nM |
| CHEMBL433258  | <chem>CCN1c2ncccc2c3ncc(C)n3c4ccc(O)nc14</chem>                                                                                          | 6248.2  | nM |
| CHEMBL85280   | <chem>Cc1ccccc1C23SCCN2C(=O)c4ccccc34</chem>                                                                                             | 6300    | nM |
| CHEMBL3142914 | <chem>CCOC(=O)P(=O)(O)OCCCN1C(=O)N(C=C(C)C1=O)[C@@H]2O[C@H](CO[Si](C)(C)C(C)(C)C)[C@@]3(OS(=O)(=O)C=C3N)[C@H]2O[Si](C)(C)C(C)(C)C</chem> | 6300    | nM |
| CHEMBL287978  | <chem>Fe1ccc(CC\N=C(/S)\Nc2ccc(Br)cn2)cc1</chem>                                                                                         | 6400    | nM |
| CHEMBL46562   | <chem>CCN1c2ncccc2C(=O)N(C)c3cccn13</chem>                                                                                               | 6400    | nM |
| CHEMBL60866   | <chem>CC(C)(C)c1ccc(cc1)S(=O)(=O)n2ccc(c2)C(O)c3ccc(Cl)cc3C1</chem>                                                                      | 6400    | nM |
| CHEMBL98394   | <chem>CCc1cc(NCc2nc3ccccc3[nH]2)c(O)nc1C</chem>                                                                                          | 6400    | nM |
| CHEMBL308549  | <chem>CSCN1c2ccccc2N(C)C(=O)c3cccn13</chem>                                                                                              | 6600    | nM |

|               |                                                                                                                                                                                                                                                                                |         |    |
|---------------|--------------------------------------------------------------------------------------------------------------------------------------------------------------------------------------------------------------------------------------------------------------------------------|---------|----|
| CHEMBL82909   | <chem>Cc1cccc(n1)C23SCCN2C(=O)c4ccnc34</chem>                                                                                                                                                                                                                                  | 6600    | nM |
| CHEMBL1807341 | <chem>Clc1cccc1c2nc3ccc(en3c2NC4CCCC4)C#N</chem><br><chem>CN(C)CCCN1C(=O)N(C=C(C)C1=O)[C@@H]2O[C@H](CO[Si](C)(C)C(C)(C)C)[C@@]3(OS(=O)(=O)C=C3N)[C@H]2O[Si](C)(C)C(C)(C)C</chem>                                                                                               | 6600    | nM |
| CHEMBL3143767 | <chem>C</chem>                                                                                                                                                                                                                                                                 | 6600    | nM |
| CHEMBL124578  | <chem>Nc1cc(Cl)nc(SCc2ccccc2)n1</chem>                                                                                                                                                                                                                                         | 6660    | nM |
| CHEMBL262415  | <chem>Cc1nc(CCCCCC(=O)c2ccccc2)n3nc(ccc13)N4CCCC4</chem>                                                                                                                                                                                                                       | 6700    | nM |
| CHEMBL385844  | <chem>CC(C)[C@H](N)C(=O)NCCCN1C(=O)N(C=C(C)C1=O)C2OC(CO[Si](C)(C)C(C)(C)C)C3(OS(=O)(=O)C=C3N)C2O[Si](C)(C)C(C)(C)C</chem><br><chem>CC(C)[C@H](N)C(=O)N[C@@H](Cc1ccccc1)C(=O)NCCCN2C(=O)N(C=C(C)C2=O)C3OC(CO[Si](C)(C)C(C)(C)C)C4(OS(=O)(=O)C=C4N)C3O[Si](C)(C)C(C)(C)C</chem>  | 6700    | nM |
| CHEMBL445417  | <chem>C3O[Si](C)(C)C(C)(C)C</chem>                                                                                                                                                                                                                                             | 6800    | nM |
| CHEMBL83356   | <chem>CCc1ccccc1CNc2cc(CC)c(C)nc2O</chem>                                                                                                                                                                                                                                      | 6900    | nM |
| CHEMBL198873  | <chem>CC(C)CC(=O)c1c(O)cc(O)c2C(=CC(=O)Oc12)c3ccccc3</chem>                                                                                                                                                                                                                    | 6900    | nM |
| CHEMBL108196  | <chem>COC(=O)CSc1nc(O)c(C)c(Cc2cccc3ccccc23)n1</chem>                                                                                                                                                                                                                          | 6990    | nM |
| CHEMBL290312  | <chem>CSCSc1cc(Cc2cc(C)cc(C)c2)c(C(C)C)c(O)n1</chem>                                                                                                                                                                                                                           | 7000    | nM |
| CHEMBL108605  | <chem>CCOC(=O)CSc1nc(O)c(C)c(Cc2cccc3ccccc23)n1</chem>                                                                                                                                                                                                                         | 7000    | nM |
| CHEMBL156598  | <chem>CCCCCCCCOC(=O)c1cc2c3ccccc3[nH]c2c(n1)c4ccc5C(=O)C=C(NC(=O)C(=O)c5n4</chem>                                                                                                                                                                                              | 7100    | nM |
| CHEMBL264639  | <chem>COC(=O)c1cc(cc(C)c1OC)C(=CCCC(=O)N2CCCC2)c3cc(C)c(OC)c(c3)C(=O)OC</chem>                                                                                                                                                                                                 | 7120    | nM |
| CHEMBL142532  | <chem>COC(=O)CCC=C(c1cc(Cl)c(OC)c(c1)C(=O)OC)c2cc(Cl)c(OC)c(c2)C(=O)OC</chem><br><chem>CC1=CN(C2OC(CO[Si](C)(C)C(C)(C)C)C3(OS(=O)(=O)C=C3N)C2O[Si](C)(C)C(C)(C)C)C(=O)N(CCCNC(=O)[C@@H]4CCCN4C(=O)[C@@H](N)CC(=O)O)C1=O</chem>                                                 | 7200    | nM |
| CHEMBL405279  | <chem>CCC(C)Sc1nc(O)cc(Cc2ccc3ccccc3c2)n1</chem>                                                                                                                                                                                                                               | 7400    | nM |
| CHEMBL290125  | <chem>CCC(C)Sc1nc(O)cc(Cc2ccc(F)cc2)n1</chem>                                                                                                                                                                                                                                  | 7400    | nM |
| CHEMBL415703  | <chem>CCc1cc(NCc2ccc(OC)cc2)c(O)nc1C</chem>                                                                                                                                                                                                                                    | 7500    | nM |
| CHEMBL85745   | <chem>CCc1cc(NCc2ccc(OC)cc2)c(O)nc1C</chem>                                                                                                                                                                                                                                    | 7500    | nM |
| CHEMBL192976  | <chem>Oc1nc2ccc(Cl)cc2n1Cc3c(Cl)cccc3Cl</chem>                                                                                                                                                                                                                                 | 7500    | nM |
| CHEMBL1807350 | <chem>Clc1cccc1c2nc3ccc4ccccc4n3c2NC5CCCC5</chem>                                                                                                                                                                                                                              | 7520    | nM |
| CHEMBL194923  | <chem>COC(=O)CCC\C=C(/c1ccccc1)C#N)c2cc(Cl)ccc2OC</chem>                                                                                                                                                                                                                       | 7580    | nM |
| CHEMBL72272   | <chem>CCN1c2ccccc2N(C)C(=O)c3cc(Cl)nc13</chem><br><chem>COc1noc2c(C)cc(cc12)\C(=C/CCN3CCOC3=O)\c4cc(C)c5ON(C)C(=O)c5c4</chem>                                                                                                                                                  | 7600    | nM |
| CHEMBL387003  | <chem>Cc1nnc2c3ccccc3N(C4CC4)c5nccccc5n12</chem>                                                                                                                                                                                                                               | 7600    | nM |
| CHEMBL290204  | <chem>Cc1nnc2c3ccccc3N(C4CC4)c5nccccc5n12</chem>                                                                                                                                                                                                                               | 7820    | nM |
| CHEMBL302957  | <chem>CCN1C(=O)c2ccccc2N(CC)c3ccccc(C)c13</chem>                                                                                                                                                                                                                               | 8000    | nM |
| CHEMBL84266   | <chem>Cc1cccc2c1C(=O)N3CCSC23c4ccccc4</chem>                                                                                                                                                                                                                                   | 8000    | nM |
| CHEMBL174899  | <chem>Cc1nc(O)c(CCc2oc3ccccc3n2)cc1C(=O)N</chem>                                                                                                                                                                                                                               | 8000    | nM |
| CHEMBL151791  | <chem>COc1cc(OC)c2CC(COc2c1)OC(=O)c3cc(O)c(O)c(O)c3</chem><br><chem>COC(=O)c1cc(cc(Cl)c1OC)C(=CCC2OCCO2)c3cc(Cl)c(OC)c(c3)C(=O)OC</chem>                                                                                                                                       | 8094.44 | nM |
| CHEMBL144209  | <chem>COC(=O)c1cc(cc(Cl)c1OC)C(=CCC2OCCO2)c3cc(Cl)c(OC)c(c3)C(=O)OC</chem>                                                                                                                                                                                                     | 8099.38 | nM |
| CHEMBL417311  | <chem>CCC(C)Sc1nc(O)cc(Cc2cccc3ccccc23)n1</chem>                                                                                                                                                                                                                               | 8100    | nM |
| CHEMBL380100  | <chem>CC1=CN([C@@H]2O[C@H](CO[Si](C)(C)C(C)(C)C)[C@@]3(OS(=O)(=O)C=C3N)[C@H]2O[Si](C)(C)C(C)(C)C)C(=O)N(CCCN)C1=O</chem><br><chem>CC1=CN(C2OC(CO[Si](C)(C)C(C)(C)C)C3(OS(=O)(=O)C=C3N)C2O[Si](C)(C)C(C)(C)C)C(=O)N(CCCNC(=O)[C@@H]4CCCN4C(=O)[C@@H](N)Cc5ccc(O)cc5)C1=O</chem> | 8100    | nM |
| CHEMBL379994  | <chem>CC1=CN([C@@H]2O[C@H](CO[Si](C)(C)C(C)(C)C)[C@@]3(OS(=O)(=O)C=C3N)[C@H]2O[Si](C)(C)C(C)(C)C)C(=O)N(CCCN)C1=O</chem>                                                                                                                                                       | 8100    | nM |
| CHEMBL107946  | <chem>Oc1ncccc1C(OCc2ccccc2)(C#CC3CC3)C(F)(F)F</chem><br><chem>CC(C)Nc1ccccc1N2CCN(CC2)C(=O)c3cc4cc(NS(=O)(=O)C(F)(F)F)cc4[nH]3</chem>                                                                                                                                         | 8115    | nM |
| CHEMBL36479   | <chem>CC(C)Nc1ccccc1N2CCN(CC2)C(=O)c3cc4cc(NS(=O)(=O)C(F)(F)F)cc4[nH]3</chem>                                                                                                                                                                                                  | 8300    | nM |
| CHEMBL326205  | <chem>CCOC(=O)CCCC=C(c1cc(Cl)c(OC)c(c1)C(=O)OC)c2cc(Cl)c(OC)c(c2)C(=O)OC</chem>                                                                                                                                                                                                | 8300    | nM |
| CHEMBL419025  | <chem>CC(C)CSc1nc(O)cc(Cc2cccc(C)c2)n1</chem>                                                                                                                                                                                                                                  | 8400    | nM |

|               |                                                                                                                                         |          |    |
|---------------|-----------------------------------------------------------------------------------------------------------------------------------------|----------|----|
| CHEMBL175235  | CCc1cc(CCc2ccc3ccccc3c2)c(O)nc1C                                                                                                        | 8400     | nM |
| CHEMBL88591   | OC(=O)c1cc(I)ccc1NC(=O)CCCC(=O)Nc2ccc(I)cc2C(=O)O                                                                                       | 8500     | nM |
| CHEMBL347255  | CCC(C)Sc1nc(O)c(C)c(Cc2ccc(Cl)cc2)n1                                                                                                    | 8500     | nM |
| CHEMBL386338  | COC(=O)CCC\C=C(\c1ccccc(c1)C#N)/c2cc(C)c3OC(=O)N(C)c3c2                                                                                 | 8597.67  | nM |
| CHEMBL163536  | O=C1c2ccccc2C34CC=CC[C@ @]13c5ccccc5C4=O                                                                                                | 8700     | nM |
| CHEMBL89524   | OC(=O)c1cc(Cl)ccc1NC(=O)CCCC(=O)Nc2ccc(Cl)cc2C(=O)O                                                                                     | 8848.73  | nM |
| CHEMBL73568   | CN1C(=O)c2cccn2N(Cc3ccccc3)c4ccccc14                                                                                                    | 9000     | nM |
| CHEMBL134252  | C[C@H]1Oc2c3C=CC(C)(C)Oc3c4C(=CC(=O)Oc4c2C=C1C)c5ccccc5<br>CCOC(=O)CCCC=C(c1cc(Br)c(OC)c(c1)C(=O)OC)c2cc(Br)c(OC)c(c<br>2)C(=O)OC       | 9000     | nM |
| CHEMBL323016  | CC(C)CSc1nc(O)cc(Cc2ccccc2)n1                                                                                                           | 9150     | nM |
| CHEMBL109213  | COC(=O)c1cc(cc(Cl)c1OC)C(=CCCN2CCOC2=O)c3cc(Cl)c(OC)c(c3)<br>C(=O)OC                                                                    | 9400     | nM |
| CHEMBL132790  | O[C@ @H]1[C@ @H](O)[C@H](Oc2cc(Cl)cc3c2NC(=O)O[C@ @]3(C#C<br>C4CC4)C(F)(F)F)O[C@ @H]([C@H]1O)C(=O)O                                     | 9470     | nM |
| CHEMBL157342  | CCc1cc(NCC2CCc3ccccc23)c(O)nc1C                                                                                                         | 9489     | nM |
| CHEMBL338873  | CCc1c(O)nc(SCSC)nc1Cc2ccccc2                                                                                                            | 9500     | nM |
| CHEMBL36031   | COC(=O)c1cc(cc(C)c1OC)\C(=C/CCN2CCOC2=O)\c3cc(C)c4ON(C)C<br>(=O)c4c3                                                                    | 9700     | nM |
| CHEMBL215346  | O=C1N2CCSC2(c3ccccc3)c4cc5ccccc5cc14                                                                                                    | 9860     | nM |
| CHEMBL82628   | CC(C)c1ccc(cc1)C23SCCN2C(=O)c4ccccc34                                                                                                   | 10000    | nM |
| CHEMBL83640   | CCc1cc(NCc2cnccc2OC)c(O)nc1C                                                                                                            | 10000    | nM |
| CHEMBL82621   | CC1(Oc2ccccc2n3ccccc3C1=O)c4ccccc4                                                                                                      | 10000    | nM |
| CHEMBL91318   | CCCC1(CC)Oc2ccccc2n3ccccc3C1=O                                                                                                          | 10000    | nM |
| CHEMBL88213   | CCc1cc(NCc2oc3cc4ccccc4cc3n2)c(O)nc1C                                                                                                   | 10000    | nM |
| CHEMBL340658  | CCCCC=C(c1cc(F)c(OC)c(c1)C(=O)OC)c2cc(F)c(OC)c(c2)C(=O)OC                                                                               | 10000    | nM |
| CHEMBL131432  | CCC1(CCCC=C(c2cc(Cl)c(OC)c(CO)c2)c3cc(Cl)c(OC)c(CO)c3)OCCO<br>1                                                                         | 10055.84 | nM |
| CHEMBL145842  | COe1ccc(NC(=O)CCCC(=O)Nc2ccc(OC)cc2C(=O)O)c(c1)C(=O)O                                                                                   | 10600    | nM |
| CHEMBL88463   | Cc1cccn2c(NC3CCCC3)c(nc12)c4ccccc4Cl                                                                                                    | 10681.3  | nM |
| CHEMBL1807337 | CN1C(=O)c2cccn2N(c3ncccc13)C(C)(C)C                                                                                                     | 11000    | nM |
| CHEMBL39505   | CCCCC=C(c1cc(I)c(OC)c(c1)C(=O)OC)c2cc(I)c(OC)c(c2)C(=O)OC                                                                               | 11000    | nM |
| CHEMBL305535  | CCC1=C(C)N(C)C(=O)C(=C1)NCc2ccc3ccccc3c2                                                                                                | 11000    | nM |
| CHEMBL122978  | COC(=O)P(=O)(OC)OCCCN1C(=O)N(C=C(C)C1=O)[C@ @H]2O[C@<br>H](CO[Si](C)(C)C(C)(C)C)[C@ @]3(OS(=O)(=O)C=C3N)[C@H]2O[Si<br>](C)(C)C(C)(C)C   | 11000    | nM |
| CHEMBL3142920 | [I-<br>].CC1=CN([C@ @H]2O[C@H](CO[Si](C)(C)C(C)(C)C)[C@ @]3(OS(=<br>O)(=O)C=C3N)[C@H]2O[Si](C)(C)C(C)(C)C(=O)N(CCC[N+](C)(C<br>)C)C1=O  | 11000    | nM |
| CHEMBL3143763 | CC(=CCc1c(O)cc(O)c2C(=CC(=O)Oc12)c3ccccc3)C                                                                                             | 11000    | nM |
| CHEMBL363624  | CC(=O)OCCOCN1C(=O)NC(=O)C2=C1Sc3ccccc3NC2                                                                                               | 11200    | nM |
| CHEMBL1807343 | OC(=O)c1cc(ccc1NC(=O)CCCC(=O)Nc2ccc(cc2C(=O)O)C(F)(F)F)C<br>(F)(F)F                                                                     | 11280    | nM |
| CHEMBL410036  | CC(C)[C@H](N)C(=O)N1CCC[C@ @H]1C(=O)NCCCN2C(=O)N(C=C<br>C(C)C2=O)C3OC(CO[Si](C)(C)C(C)(C)C)C4(OS(=O)(=O)C=C4N)C3<br>O[Si](C)(C)C(C)(C)C | 11500    | nM |
| CHEMBL89674   | Clc1ccccc1c2nc3ccc(Br)en3c2NC4CCCCC4                                                                                                    | 12000    | nM |
| CHEMBL408333  | CCCON1C(=O)NC(=O)C(=C1Sc2cc(C)cc(C)c2)C(C)C                                                                                             | 12049.9  | nM |
| CHEMBL1807346 | CCc1cc(NCc2ccccc2C(F)(F)F)c(O)nc1C                                                                                                      | 12200    | nM |
| CHEMBL76986   | Oc1ccccc(c1)C23SCCN2C(=O)c4ccccc34                                                                                                      | 12300    | nM |
| CHEMBL83301   | CC(=O)NC1=CC(=O)c2ccc(nc2C1=O)c3[nH]c(cc4c5ccccc5nc34)C(=O)                                                                             | 12500    | nM |
| CHEMBL312160  |                                                                                                                                         | 12700    | nM |
| CHEMBL152355  |                                                                                                                                         | 12700    | nM |

|               |                                                                                                                                     |          |    |
|---------------|-------------------------------------------------------------------------------------------------------------------------------------|----------|----|
|               | )N                                                                                                                                  |          |    |
| CHEMBL362924  | Oc1nc2ccc(Cl)cc2n1Cc3cccc4ccccc34                                                                                                   | 12700    | nM |
| CHEMBL48690   | CCN1c2ncccc2c3nccn3c4ccc(O)nc14                                                                                                     | 12915.96 | nM |
| CHEMBL417737  | C[C@@H](\N=C(/S)\Nc1nccs1)C2CCCCC2                                                                                                  | 13000    | nM |
| CHEMBL316466  | CCC(C)Sc1nc(O)c(C)c(Cc2ccc(F)cc2)n1                                                                                                 | 13000    | nM |
| CHEMBL213365  | CC1=CN(C2OC(CO[Si](C)(C)C(C)(C)C)C3(OS(=O)(=O)C=C3N)C2O[Si](C)(C)C(C)(C)C(=O)N(CCCNC(=O)[C@@H]4CCCN4C(=O)CN)C1=O                    | 13000    | nM |
| CHEMBL346794  | CC(=O)NC1=CC(=O)c2ccc(nc2C1=O)c3[nH]c(cc4c5ccccc5nc34)C(=O)O                                                                        | 13300    | nM |
| CHEMBL177074  | CCc1cc(CCc2oc3ccncc3c2)c(O)nc1C                                                                                                     | 13500    | nM |
| CHEMBL59279   | C[C@H]1Cn2c(S)nc3ccc(C)c(CN1CC=C(C)C)c23                                                                                            | 13600    | nM |
| CHEMBL89744   | Cc1ccc(NC(=O)CCCC(=O)Nc2ccc(C)cc2C(=O)O)c(c1)C(=O)O                                                                                 | 14000    | nM |
| CHEMBL341238  | Cc1nc(CCCCCCc2ccccc2)n3nc(Cl)ccc13                                                                                                  | 14000    | nM |
| CHEMBL1807344 | Clc1ccc2nc(c(NC3CCCCC3)n2c1)c4ccccc4Cl                                                                                              | 14470    | nM |
| CHEMBL625     | c1ccc2[nH]c(nc2c1)c3csen3                                                                                                           | 14600    | nM |
| CHEMBL67095   | CN1CC2=C(Sc3ccccc13)N(COCCOC(=O)C)C(=O)NC2=O                                                                                        | 14700    | nM |
| CHEMBL82454   | O=C1N2CCCC2(c3ccccc3)c4ccccc14                                                                                                      | 15000    | nM |
| CHEMBL314121  | OC(=O)c1cc(Br)ccc1NC(=O)CCCC(=O)Nc2ccc(Br)cc2                                                                                       | 15000    | nM |
| CHEMBL88458   | OC(=O)c1cc(Br)ccc1NC(=O)Cc2ccc(c2)C(=O)Nc3ccc(Br)cc3C(=O)O                                                                          | 15000    | nM |
| CHEMBL313804  | CCC1(Sc2ccccc2n3ccccc3C1=O)c4ccccc4                                                                                                 | 15000    | nM |
| CHEMBL379599  | CC1=CN([C@@H]2O[C@H](CO[Si](C)(C)C(C)(C)C)[C@@]3(OS(=O)(=O)C=C3N)[C@H]2O[Si](C)(C)C(C)(C)C(=O)N(CC(=O)O)C1=O                        | 15000    | nM |
| CHEMBL347211  | COC(=O)c1[nH]c(c2ccc3C(=O)C=C(NC(=O)C)C(=O)c3n2)c4nc5ccccc5c4c1C                                                                    | 15100    | nM |
| CHEMBL290781  | CN1C(=O)c2cccn2N(C(=O)C)c3ncccc13                                                                                                   | 15300    | nM |
| CHEMBL57772   | Fe1cccc(F)c1Cn2c(nc3ccccc23)c4ccccc4                                                                                                | 16000    | nM |
| CHEMBL63680   | COC(=O)C=C(c1cc(Cl)c(OC)c(c1)C(=O)OC)c2cc(Cl)c(OC)c(c2)C(=O)OC                                                                      | 16000    | nM |
| CHEMBL72920   | CCOC(=O)CN1c2ccccc2N(C)C(=O)c3cccn13                                                                                                | 16000    | nM |
| CHEMBL340145  | Nc1cc(Cl)nc(SCC2=CCc3ccccc23)n1                                                                                                     | 16000    | nM |
| CHEMBL176982  | CCc1cc(CCCc2oc3ccccc3n2)c(O)nc1C                                                                                                    | 16000    | nM |
| CHEMBL379485  | CC(C)[C@H](N)C(=O)N1C[C@H](O)C[C@H]1C(=O)NCCCN2C(=O)N(C=C(C)C2=O)C3OC(CO[Si](C)(C)C(C)(C)C)C4(OS(=O)(=O)C=C4N)C3O[Si](C)(C)C(C)(C)C | 16000    | nM |
| CHEMBL192499  | CC(C)c1ccc(Cn2c(O)nc3ccc(Cl)cc23)cc1                                                                                                | 16200    | nM |
| CHEMBL347273  | Oc1ccc2CC(COc2c1)OC(=O)c3cc(O)c(O)c(O)c3                                                                                            | 16609.64 | nM |
| CHEMBL59133   | OC(c1ccn(c1)S(=O)(=O)c2ccc(Cl)cc2)c3ccc(Cl)cc3Cl                                                                                    | 17000    | nM |
| CHEMBL309921  | O=C1N2CCSC2(c3ccccc3)c4ncccc14                                                                                                      | 17000    | nM |
| CHEMBL301913  | Cc1ccc(cc1)S(=O)(=O)n2ccc(c2)C(O)c3ccc(Cl)cc3Cl                                                                                     | 18000    | nM |
| CHEMBL132691  | Fe1cccc(F)c1c2nc3ccccc3n2Cc4ccccc4                                                                                                  | 18600    | nM |
| CHEMBL32386   | CSCSe1nc(O)c(C)c(Cc2ccccc2)n1                                                                                                       | 18800    | nM |
| CHEMBL90333   | CSe1ccc(NC(=O)CCCC(=O)Nc2ccc(SC)cc2C(=O)O)c(c1)C(=O)O                                                                               | 19000    | nM |
| CHEMBL85069   | OC(=O)c1cc(Br)ccc1NC(=O)c2ccc(c2)C(=O)Nc3ccc(Br)cc3C(=O)O                                                                           | 19000    | nM |
| CHEMBL151175  | Oc1cc(cc(O)c1O)C(=O)OC2COc3ccccc(O)c3C2                                                                                             | 19895.98 | nM |
| CHEMBL192310  | Fe1cccc(F)c1CN2C(=O)Oc3ccc(Cl)cc23                                                                                                  | 20000    | nM |
| CHEMBL154000  | NC(=O)c1cc2c3ccccc3[nH]c2c(n1)c4ccc5C(=O)C=C(NC(=O)C(=O)c5n4                                                                        | 20500    | nM |
| CHEMBL315784  | OC(=O)c1ccccc1NC(=O)CCCC(=O)Nc2ccccc2C(=O)O                                                                                         | 21000    | nM |
| CHEMBL1807331 | Clc1ccc(c(Cl)c1)c2nc3cccn3c2NC4CCCCC4                                                                                               | 21760    | nM |
| CHEMBL59226   | CCc1ccc(cc1)S(=O)(=O)n2ccc(c2)C(O)c3ccc(Cl)cc3Cl                                                                                    | 22000    | nM |

|               |                                                                                                                                                           |          |    |
|---------------|-----------------------------------------------------------------------------------------------------------------------------------------------------------|----------|----|
| CHEMBL123839  | <chem>Cc1nc(CCCCCOC(=O)C2CCCC2)n3nc(Cl)ccc13</chem>                                                                                                       | 22000    | nM |
| CHEMBL197138  | <chem>COc1c(C(=O)CC(C)C)c(O)c(CC=C(C)C)c2OC(=O)C=C(c3ccccc3)c12</chem>                                                                                    | 22200    | nM |
| CHEMBL151146  | <chem>Oc1cc(cc(O)c1O)C(=O)OCCc2ccccc2</chem>                                                                                                              | 22427.88 | nM |
| CHEMBL301973  | <chem>CCN1c2neccc2c3nnnn3c4c(C)ccnc14</chem>                                                                                                              | 22464.91 | nM |
| CHEMBL33311   | <chem>CCC(C)Sc1nc(O)c(C)c(Cc2cccc3ccccc23)n1</chem>                                                                                                       | 22500    | nM |
| CHEMBL314443  | <chem>O=C1N2CCSC2(c3ccccc3)c4neccc14</chem>                                                                                                               | 23000    | nM |
| CHEMBL123864  | <chem>CCc1cc(NCc2oc3cccc(c3n2)[N+](=O)[O-])c(O)nc1C</chem>                                                                                                | 24500    | nM |
| CHEMBL299935  | <chem>Fe1ccc2NS(=O)(=O)NC(C#CC3CC3)(c2c1F)C(F)(F)F</chem>                                                                                                 | 24667    | nM |
| CHEMBL328235  | <chem>C=CCC1(Oc2ccccc2n3ccccc3C1=O)c4ccccc4</chem>                                                                                                        | 25000    | nM |
| CHEMBL304269  | <chem>COC(=O)c1cc(cc(Br)c1OC)C(=CC)c2cc(Br)c(OC)c(c2)C(=O)OC</chem>                                                                                       | 26000    | nM |
| CHEMBL85270   | <chem>O=C1N2CCSC2(c3ccccc3)c4c1ccc5ccccc45</chem>                                                                                                         | 26000    | nM |
| CHEMBL34010   | <chem>CC(C)Nc1ccnc1N2CCN(CC2)C(=O)c3cc4cc(NC(=O)C(F)(F)F)ccc4[nH]3</chem>                                                                                 | 27000    | nM |
| CHEMBL57709   | <chem>Cc1ccccc1S(=O)(=O)n2ccc(c2)C(O)c3ccc(Cl)cc3Cl</chem>                                                                                                | 27000    | nM |
| CHEMBL305503  | <chem>CCN1c2ccc(cc2N(C)C(=O)c3ccccc13)C(=O)N</chem>                                                                                                       | 27000    | nM |
| CHEMBL313308  | <chem>O=C1N2CCSC2(c3ccccc3)c4ccccc14</chem>                                                                                                               | 28000    | nM |
| CHEMBL83300   | <chem>CCc1cc(NCc2ccccc2N)c(O)nc1C</chem>                                                                                                                  | 28000    | nM |
| CHEMBL378646  | <chem>CC(C)[C@H](N)C(=O)N1C[C@H](C[C@H]1C(=O)NCCCN2C(=O)N(C=C(C)C2=O)C3OC(CO[Si](C)(C)C(C)(C)C)C4(OS(=O)(=O)C=C4N)C3O[Si](C)(C)C(C)(C)C)OCc5ccccc5</chem> | 28000    | nM |
| CHEMBL292808  | <chem>OC(c1ccn(c1)S(=O)(=O)c2ccccc2)c3ccccc3Cl</chem>                                                                                                     | 29500    | nM |
| CHEMBL58811   | <chem>C[C@H]1Cn2c(S)nc3ccc(C#C)c(CN1CC=C(C)C)c23</chem>                                                                                                   | 29500    | nM |
| CHEMBL287025  | <chem>CCC(C)Sc1nc(O)c(C)c(Cc2ccc3ccccc3c2)n1</chem>                                                                                                       | 29700    | nM |
| CHEMBL106414  | <chem>CCCOC(=O)CCCC=C(c1cc(C)c(OC)c(c1)C(=O)OC)c2cc(C)c(OC)c(c2)C(=O)OC</chem>                                                                            | 29700    | nM |
| CHEMBL3143797 | <chem>COC(=O)C=C\CN1C(=O)N(C=C(C)C1=O)[C@@H]2O[C@H](CO[Si](C)(C)C(C)(C)C)[C@@]3(OS(=O)(=O)C=C3N)[C@H]2O[Si](C)(C)C(C)(C)C</chem>                          | 30000    | nM |
| CHEMBL333862  | <chem>C[S+](O)c1cc(NCc2oc3ccccc3n2)c(O)nc1C</chem>                                                                                                        | 31500    | nM |
| CHEMBL65776   | <chem>COC(=O)c1cc(cc(Br)c1OC)C(=CCCO)c2cc(Br)c(OC)c(c2)C(=O)OC</chem>                                                                                     | 31600    | nM |
| CHEMBL144509  | <chem>CCC1(CCC\C=C(\c2cc(Cl)c(OC)c(CO)c2)/c3cc(Cl)c(OC)c(C=O)c3)OC</chem>                                                                                 | 31600    | nM |
| CHEMBL334946  | <chem>C[C@H]1Oc2c3C=CC(C)(C)Oc3c4C(=CC(=O)Oc4c2C(=O)[C@@H]1C)c5ccccc5</chem>                                                                              | 31622.78 | nM |
| CHEMBL383592  | <chem>CC(C)C(=O)c1c(O)c(CC=C(C)C)c(O)c2C(=CC(=O)Oc12)c3ccccc3</chem>                                                                                      | 31900    | nM |
| CHEMBL198546  | <chem>CC(C)C(=O)c1c(O)c2C(=CC(=O)Oc2c3C=CC(C)(C)Oc13)c4ccccc4</chem>                                                                                      | 32100    | nM |
| CHEMBL32690   | <chem>Oc1cc(Cc2ccc3ccccc3c2)nc(SC4CCCC4)n1</chem>                                                                                                         | 33100    | nM |
| CHEMBL298981  | <chem>CCN1c2neccc2c3nnc(CC)n3c4ccccc14</chem>                                                                                                             | 33813.02 | nM |
| CHEMBL433931  | <chem>COc1ccc2NC(=S)N3C[C@H](C)N(CC=C(C)C)Cc1c23</chem>                                                                                                   | 33900    | nM |
| CHEMBL287924  | <chem>CC(C)Nc1ccccc1N2CCN(CC2)C(=O)c3cc4ccc(C)ccc4[nH]3</chem>                                                                                            | 34000    | nM |
| CHEMBL89319   | <chem>OC(=O)c1cc(Br)ccc1NC(=O)c2ccc(nc2)C(=O)Nc3ccc(Br)cc3C(=O)O</chem>                                                                                   | 35000    | nM |
| CHEMBL314003  | <chem>CCc1cc(NCc2ccccc2COC)c(O)nc1C</chem>                                                                                                                | 35500    | nM |
| CHEMBL58552   | <chem>Clc1ccc2NS(=O)(=O)NC(C#CC3CC3)(C4CC4)c2c1</chem>                                                                                                    | 35870    | nM |
| CHEMBL37994   | <chem>CC(C)Nc1ccccc1N2CCN(CC2)C(=O)c3cc4ccc(OCc5ccccc5)cc4[nH]3</chem>                                                                                    | 37000    | nM |
| CHEMBL355912  | <chem>Oc1cc(O)c2CC(COe2c1)OC(=O)c3ccc(O)c(O)c3</chem>                                                                                                     | 37200    | nM |
| CHEMBL86243   | <chem>C[C@@H]1CN2C(=O)c3ccccc3C2(O1)c4ccccc4</chem>                                                                                                       | 37600    | nM |
| CHEMBL299555  | <chem>CCN1c2neccc2c3nnc(C)n3c4ccccc14</chem>                                                                                                              | 38900    | nM |
| CHEMBL85459   | <chem>O=C1N2Cc3ccccc3SC2(c4ccccc4)c5ccccc15</chem>                                                                                                        | 40000    | nM |
| CHEMBL346225  | <chem>Cc1ccc(nc1)N2C(SCC2=O)c3c(C)ccccc3Cl</chem>                                                                                                         | 42400    | nM |
| CHEMBL52500   | <chem>CCN1c2neccc2c3nnnc3c4c(C)ccnc14</chem>                                                                                                              | 44500    | nM |
| CHEMBL286313  | <chem>Cc1c(O)nc(SC2CCCC2)nc1Cc3cccc4ccccc34</chem>                                                                                                        | 45000    | nM |
| CHEMBL144096  | <chem>Nc1ccc2c(cc(c(N)c2c1O)S(=O)(=O)O)S(=O)(=O)O</chem>                                                                                                  | 45000    | nM |

|              |                                                                                                 |          |    |
|--------------|-------------------------------------------------------------------------------------------------|----------|----|
| CHEMBL367515 | <chem>CCc1cc(Cc2oc3ccccc3n2)c(O)nc1C</chem>                                                     | 45000    | nM |
| CHEMBL334861 | <chem>C[C@H]1Oc2c3C=CC(C)(C)Oc3c4C(=CC(=O)O)c4c2[C@H]([C@H]1C)C(=O)c5ccc(Br)cc5)c6ccccc6</chem> | 46000    | nM |
| CHEMBL36019  | <chem>Oc1cc(Cc2ccccc3ccccc23)nc(SC4CCCC4)n1</chem>                                              | 48700    | nM |
| CHEMBL214489 | <chem>COC(=O)CCC\C=C(/c1cc(C)c2OC(=O)N(C)c2c1)\c3cc(C)c4ON(C)C(=O)c4c3</chem>                   | 49200    | nM |
| CHEMBL212395 | <chem>COC(=O)CCC\C=C(/c1ccccc(c1)C#N)/c2cc(C)c3ON(C)C(=O)c3c2</chem>                            | 49600    | nM |
| CHEMBL444789 | <chem>Nc1cc(c2ccccc2c1N)S(=O)(=O)O</chem>                                                       | 50000    | nM |
| CHEMBL353328 | <chem>CCc1cc(CCc2ccccc2)c(O)nc1C</chem>                                                         | 50000    | nM |
| CHEMBL366202 | <chem>Oc1nc2ccc(Cl)cc2n1CC3CCCC3</chem>                                                         | 50000    | nM |
| CHEMBL302788 | <chem>CCOCN1C(=O)NC(=O)C2=C1Sc3ccccc3NC2</chem>                                                 | 50200    | nM |
| CHEMBL316043 | <chem>O=C1N2CCCOC2(c3ccccc3)c4ccccc14</chem>                                                    | 51000    | nM |
| CHEMBL84743  | <chem>C[C@H]1COC2(N1C(=O)c3ccccc23)c4ccccc4</chem>                                              | 54037.02 | nM |
| CHEMBL194649 | <chem>COC(=O)CCC\C=C(/c1cc(C)c(OC)c(c1)C(=O)OC)\c2cc(F)cc(c2)C(F)(F)F</chem>                    | 55300    | nM |
| CHEMBL58506  | <chem>C[C@H]1Cn2c(S)nc3ccc(C#N)c(CN1CC=C(C)C)c23</chem>                                         | 56300    | nM |
| CHEMBL357261 | <chem>Clc1cccc(Cl)c1C2SCC(=O)N2c3ccc(Br)cn3</chem>                                              | 56600    | nM |
| CHEMBL312872 | <chem>NC(=O)[C@H]1CSC2(N1C(=O)c3ccccc23)c4ccccc4</chem>                                         | 59000    | nM |
| CHEMBL191692 | <chem>Oc1nc2cc(Cl)ccc2n1Cc3c(F)cccc3F</chem>                                                    | 60000    | nM |
| CHEMBL323276 | <chem>COC(=O)c1cc(cc(C)c1OC)C(=CCCC(=O)OC(C)C)c2cc(C)c(OC)c(c2)C(=O)OC</chem>                   | 60400    | nM |
| CHEMBL357713 | <chem>Fe1cccc(F)c1C2SCC(=O)N2c3ccc(Br)cn3</chem>                                                | 61400    | nM |
| CHEMBL296773 | <chem>CCN1c2neccc2c3nnc(C(C)C)n3c4ccnc14</chem>                                                 | 62600    | nM |
| CHEMBL63394  | <chem>COC(=O)c1cc(cc(Cl)c1OC)C(=CCCN)c2cc(Cl)c(OC)c(c2)C(=O)OC</chem>                           | 63000    | nM |
| CHEMBL133842 | <chem>COC(=O)c1cc(cc(Cl)c1OC)C(=CCNC(=O)OCC(C)C)c2cc(Cl)c(OC)c(c2)C(=O)OC</chem>                | 65400    | nM |
| CHEMBL315961 | <chem>OC(=O)c1cc(Br)ccc1NC(=O)c2ccnc(c2)C(=O)Nc3ccc(Br)cc3C(=O)O</chem>                         | 66000    | nM |
| CHEMBL339425 | <chem>CCc1cc(NCc2oc3ccccc(N)c3n2)c(O)nc1C</chem>                                                | 67000    | nM |
| CHEMBL150149 | <chem>Fe1cccc(F)c1C2SCC(=O)N2c3ccc(Cl)cn3</chem>                                                | 67000    | nM |
| CHEMBL335955 | <chem>C[C@H]1Oc2c([C@@H](O)[C@H]1C)c3OC(=O)C=C(c4ccccc4)c3c5O[C@H]6[C@@H](c25)C6(C)C</chem>     | 70000    | nM |
| CHEMBL144121 | <chem>COC(=O)c1cc(cc(Cl)c1OC)C(=CCCCCl)c2cc(Cl)c(OC)c(c2)C(=O)OC</chem>                         | 70000    | nM |
| CHEMBL323259 | <chem>COC(=O)c1cc(cc(Br)c1OC)C(=CCCC(=O)OC(C)C)c2cc(Br)c(OC)c(c2)C(=O)OC</chem>                 | 70800    | nM |
| CHEMBL295165 | <chem>CCN1c2neccc2c3nnc3c4ccnc14</chem>                                                         | 72800    | nM |
| CHEMBL85514  | <chem>O=C1N2CCCCC2(c3ccccc3)c4ccccc14</chem>                                                    | 75500    | nM |
| CHEMBL418686 | <chem>COC(=O)c1cc(cc(Br)c1OC)C(=CCCN=[N+]=[N-])c2cc(Br)c(OC)c(c2)C(=O)OC</chem>                 | 94000    | nM |
| CHEMBL63229  | <chem>COC(=O)c1cc(cc(Cl)c1OC)C(=CCOS(=O)(=O)C)c2cc(Cl)c(OC)c(c2)C(=O)OC</chem>                  | 96000    | nM |
| CHEMBL347272 | <chem>Oc1cc(O)cc(c1)C(=O)OC2COc3cc(O)cc(O)c3C2</chem>                                           | 96300    | nM |
| CHEMBL196121 | <chem>COc1ccc(cc1OC)\C=C/CCN2CCOC2=O)\c3cc(F)cc(c3)C(F)(F)F</chem>                              | 97800    | nM |
| CHEMBL108267 | <chem>COC(=O)c1cc(cc(Br)c1OC)C(=CCCC=C)c2cc(Br)c(OC)c(c2)C(=O)OC</chem>                         | 99000    | nM |
| CHEMBL32718  | <chem>O=C1C(Sc2ccccc2n3ccccc13)c4ccccc4</chem>                                                  | 100000   | nM |
| CHEMBL63988  | <chem>COC(=O)c1cc(cc(Cl)c1OC)C(=CCCC(=O)O)c2cc(Cl)c(OC)c(c2)C(=O)OC</chem>                      | 100000   | nM |
| CHEMBL330735 | <chem>CCC1Oc2ccccc2n3ccccc3C1=O</chem>                                                          | 100000   | nM |
| CHEMBL359242 | <chem>COC(=O)CCCC(c1cc(Cl)c(OC)c(c1)C(=O)OC)c2cc(Cl)c(OC)c(c2)C(=O)OC</chem>                    | 100000   | nM |
| CHEMBL367850 | <chem>CCC1=C(C)NC(N)C(=C1)CCc2oc3ccccc3n2</chem>                                                | 100000   | nM |



### 8.3 Integrase training set

|               |                                                                          |      |    |
|---------------|--------------------------------------------------------------------------|------|----|
| CHEMBL1917873 | CC(C)N1C(=O)C(=C(O)c2ncccc12)C(=O)NCc3ccc(F)cc3                          | 1    | nM |
| CHEMBL3806067 | NC(=O)c1c2[C@H]3CCCCN3C(=O)c2c(O)c4ncc(Cc5cccc(Cl)c5F)cc14               | 1.1  | nM |
| CHEMBL454633  | Oc1c(nc(N2CCCCS2(=O)=O)c3cccn13)c4oc(Cc5ccc(F)cc5)nn4                    | 2    | nM |
| CHEMBL492465  | CN(C)C1(CCOCC1)C2=NC(=C(O)C(=O)N2C)C(=O)NCc3ccc(F)cc3                    | 2    | nM |
| CHEMBL549422  | CC1(C)N(Cc2nnn[nH]2)CCN3C(=O)C(=C(N=C13)C(=O)NCc4ccc(F)cc4)O             | 2    | nM |
| CHEMBL556894  | Cn1cc(CN2CCN3C(=O)C(=C(N=C3C2(C)C)C(=O)NCc4ccc(F)cc4)O)n1                | 2    | nM |
| CHEMBL2316125 | C[C@H](O)CNC(=O)C1=C(O)c2ncc(Cc3ccc(F)cc3)cc2N(C)C1=O                    | 2    | nM |
| CHEMBL2403116 | OC1=C2N(C[C@@H]3OCCCN3C2=O)C=C(C(=O)NCc4ccc(F)cc4)C1=O                   | 2    | nM |
| CHEMBL1213165 | [Na+].[C@@H]1CCO[C@H]2CN3C=C(C(=O)NCc4ccc(F)cc4F)C(=O)C(=C3C(=O)N12)[O-] | 2.7  | nM |
| CHEMBL1229211 | C[C@@H]1CCO[C@H]2CN3C=C(C(=O)NCc4ccc(F)cc4F)C(=O)C(=C3C(=O)N12)O         | 2.7  | nM |
| CHEMBL1773312 | ON1CCc2c(ncc3c2ccn3Cc4ccc(F)cc4)C1=O                                     | 2.9  | nM |
| CHEMBL492464  | CN1C(=O)C(=C(N=C1C(C)(C)N2CCOCC2)C(=O)NCc3ccc(F)cc3)O                    | 3    | nM |
| CHEMBL559395  | CC1(C)N(Cc2coen2)CCN3C(=O)C(=C(N=C13)C(=O)NCc4ccc(F)cc4)O                | 3    | nM |
| CHEMBL550051  | CC1(C)N(CCN2CCOCC2)CCN3C(=O)C(=C(N=C13)C(=O)NCc4ccc(F)cc4)O              | 3    | nM |
| CHEMBL2316116 | CC(C)(CO)NC(=O)C1=C(O)c2ncc(Cc3ccc(F)cc3)cc2NC1=O                        | 3    | nM |
| CHEMBL2403238 | C[C@H]1CO[C@@H]2CN3C=C(C(=O)NCc4ccc(F)cc4F)C(=O)C(=C3C(=O)N12)O          | 3    | nM |
| CHEMBL3310085 | CN(C)C(=O)CN1C(=O)C(=C(O)c2ncc(Cc3ccc(F)cc3)cc12)C(=O)NC4CC4             | 3    | nM |
| CHEMBL3360113 | CSC1COCC1C2=NC(=C(O)C(=O)N2C)C(=O)NCc3ccc(F)cc3                          | 3    | nM |
| CHEMBL3360128 | COCCN1CCN(C1=O)c2cc(F)ccc2CNC(=O)C3=C(O)C(=O)N(C)C(=N3)C4CCOC4           | 3    | nM |
| CHEMBL2316126 | C[C@@H](CO)CNC(=O)C1=C(O)c2ncc(Cc3ccc(F)cc3)cc2N(C)C1=O                  | 3.46 | nM |
| CHEMBL242926  | CN(C)CC(=O)N1CCN(C)C(C1)C2=NC(=C(O)C(=O)N2C)C(=O)NCc3ccc(F)cc3           | 4    | nM |
| CHEMBL412149  | COc1cc(\C=C/2\C(=NN(C2=O)c3nnn[nH]3)C)cc(Cl)c1OC                         | 4    | nM |
| CHEMBL429327  | CCOc1cc(\C=C/2\C(=NN(C2=O)c3nnn[nH]3)C)cc(Cl)c1OCC                       | 4    | nM |
| CHEMBL522802  | CNC(=O)C1=C(O)c2ncc(Cc3ccc(F)cc3)cc2N(C)C1=O                             | 4    | nM |
| CHEMBL491336  | CCNC(=O)C1=C(O)c2ncc(Cc3ccc(F)cc3)cc2N(C)C1=O                            | 4    | nM |
| CHEMBL491347  | COCCNC(=O)C1=C(O)c2ncc(Cc3ccc(F)cc3)cc2N(C)C1=O                          | 4    | nM |
| CHEMBL480904  | COc1cccc1CCN2CC(=C(O)C2=O)C(=O)NCc3ccc(F)cc3                             | 4    | nM |
| CHEMBL522374  | CN1C(=O)C(=C(N=C1C(C)(C)NC(=O)C(=O)O)C(=O)NCc2ccc(F)cc2)O                | 4    | nM |
| CHEMBL517428  | CN(C)C(=O)C(=O)NC(C)(C)C1=NC(=C(O)C(=O)N1C)C(=O)NCc2ccc(F)cc2S(=O)(=O)C  | 4    | nM |
| CHEMBL517136  | CN1C(=O)C(=C(N=C1C(C)(C)NC(=O)c2nnc(C)[nH]2)C(=O)NCc3ccc(F)cc3)O         | 4    | nM |
| CHEMBL549592  | CN1CCN(CC1(C)C2=NC(=C(O)C(=O)N2C)C(=O)NCc3ccc(F)cc3)C(=O)C               | 4    | nM |
| CHEMBL558051  | CC1(C)N(Cc2ocnc2)CCN3C(=O)C(=C(N=C13)C(=O)NCc4ccc(F)cc4)O                | 4    | nM |
| CHEMBL1914460 | CN(C)C(=O)CN1C(=O)C(=C(O)c2ncc(Cc3ccc(F)cc3)cc12)C(=O)NCc4ccc(F)cc4      | 4    | nM |
| CHEMBL2316111 | CN(CCN(C(=O)C1=C(O)c2ncc(Cc3ccc(F)cc3)cc2NC1=O)S(=O)(=O)C                | 4    | nM |

|               |                                                                                                                           |      |    |
|---------------|---------------------------------------------------------------------------------------------------------------------------|------|----|
| CHEMBL2316118 | CC(C)(CO)CNC(=O)C1=C(O)c2ncc(Cc3ccc(F)cc3)cc2NC1=O                                                                        | 4    | nM |
| CHEMBL2316136 | OC1=C(C(=O)NCCCN2CCCC2=O)C(=O)Nc3cc(Cc4ccc(F)cc4)enc13<br>COCCNC(=O)C1=C(O)c2ncc(Cc3ccc(F)cc3)cc2N(CC(=O)N(C)C)C1=O       | 4    | nM |
| CHEMBL3310087 | O                                                                                                                         | 4    | nM |
| CHEMBL3360111 | CN1C(=O)C(=C(N=C1C2CCOC2)C(=O)NCc3ccc(F)cc3)O                                                                             | 4    | nM |
| CHEMBL3360121 | CN1C(=O)C(=C(N=C1C2CCOC2)C(=O)NCc3ccc(F)cc3n4encn4)O                                                                      | 4    | nM |
| CHEMBL2311585 | C[C@H](O)CNC(=O)C1=C(O)c2ncc(Cc3ccc(F)cc3)cc2NC1=O<br>CCN(CC)C(=O)CN1C(=O)C(=C(O)c2ncc(Cc3ccc(F)cc3)cc12)C(=O)N<br>C      | 4.24 | nM |
| CHEMBL3309906 | C                                                                                                                         | 4.4  | nM |
| CHEMBL3310078 | CNC(=O)C1=C(O)c2ncc(Cc3ccc(F)cc3)cc2N(CC(=O)NC4CC4)C1=O                                                                   | 4.4  | nM |
| CHEMBL2316114 | C[C@H](CO)NC(=O)C1=C(O)c2ncc(Cc3ccc(F)cc3)cc2NC1=O<br>COCCNC(=O)C1=C(O)c2ncc(Cc3ccc(F)cc3)cc2N(CC(=O)N4CCCC4<br>)C1=O     | 4.47 | nM |
| CHEMBL3310413 | )C1=O                                                                                                                     | 4.7  | nM |
| CHEMBL1256978 | CN1C(=O)C(=C(O)c2ncc(Cc3ccc(F)cc3)cc12)C(=O)NCCO                                                                          | 4.93 | nM |
| CHEMBL406595  | Nc1c2C=C(C(=O)O)C(=O)Nc2sc1C(=O)Nc3ccc(Cl)c(Cl)c3                                                                         | 5    | nM |
| CHEMBL407352  | OC(=O)CSc1nnc(c2occc2)c(n1)c3occc3                                                                                        | 5    | nM |
| CHEMBL272420  | COc1ccc(\C=C/2\C=NN(C2=O)c3nnn[nH]3)C)cc1OCc4cccc4Cl                                                                      | 5    | nM |
| CHEMBL492188  | COCCNC(=O)C1=C(O)c2ncc(Cc3ccc(F)cc3)cc2NC1=O                                                                              | 5    | nM |
| CHEMBL481094  | OC1=C(CN(CCCc2ccccc2)C1=O)C(=O)NCc3ccc(F)cc3<br>CC1(C)N(Cc2ccccc2)CCN3C(=O)C(=C(N=C13)C(=O)NCc4ccc(F)cc4)<br>O            | 5    | nM |
| CHEMBL563502  | CC1(C)N(Cc2ccn[nH]2)CCN3C(=O)C(=C(N=C13)C(=O)NCc4ccc(F)c<br>c4)O                                                          | 5    | nM |
| CHEMBL559537  | CC1=C(C=C2C(CCC(CC#N)C2(C)C)C1=C)C(=C)CCc3ccc(C)cc3<br>Cn1nnnc1CN2CCN3C(=O)C(=C(N=C3C2(C)C)C(=O)NCc4ccc(F)cc4)<br>O       | 5    | nM |
| CHEMBL550985  | O                                                                                                                         | 5    | nM |
| CHEMBL552065  | CC1(C)NC(=O)CN2C(=O)C(=C(N=C12)C(=O)NCc3ccc(F)cc3)O<br>Cc1oc(CN2CCN3C(=O)C(=C(N=C3C2(C)C)C(=O)NCc4ccc(F)cc4)O)n<br>n1     | 5    | nM |
| CHEMBL554284  | n1                                                                                                                        | 5    | nM |
| CHEMBL557854  | CC(=O)N1CCN2C(=O)C(=C(N=C2C1(C)C)C(=O)NCc3ccc(F)cc3)O<br>CC1(C)N(CC(=O)N)CCN2C(=O)C(=C(N=C12)C(=O)NCc3ccc(F)cc3)<br>O     | 5    | nM |
| CHEMBL558641  | O                                                                                                                         | 5    | nM |
| CHEMBL2315830 | CN1C(=O)C(=C(O)c2ncc(Cc3ccc(F)cc3)cc12)C(=O)NCCN4CCNC4=<br>O                                                              | 5    | nM |
| CHEMBL2315831 | CN1C(=O)C(=C(O)c2ncc(Cc3ccc(F)cc3)cc12)C(=O)NCCNC(=O)C<br>CN(CCNC(=O)C1=C(O)c2ncc(Cc3ccc(F)cc3)cc2N(C)C1=O)S(=O)(=O<br>)C | 5    | nM |
| CHEMBL2315832 | )C                                                                                                                        | 5    | nM |
| CHEMBL2316113 | CSCCNC(=O)C1=C(O)c2ncc(Cc3ccc(F)cc3)cc2NC1=O                                                                              | 5    | nM |
| CHEMBL2316119 | CN1C(=O)C(=C(O)c2ncc(Cc3ccc(F)cc3)cc12)C(=O)NCC(F)F                                                                       | 5    | nM |
| CHEMBL2316120 | CN1C(=O)C(=C(O)c2ncc(Cc3ccc(F)cc3)cc12)C(=O)NCCCO                                                                         | 5    | nM |
| CHEMBL2316129 | CC(C)CCNC(=O)C1=C(O)c2ncc(Cc3ccc(F)cc3)cc2NC1=O                                                                           | 5    | nM |
| CHEMBL2316132 | OCCNC(=O)C1=C(O)c2ncc(Cc3ccc(F)cc3)cc2NC1=O<br>C[C@@H]1CCN2[C@H](CN3C=C(C(=O)NCc4ccc(F)cc4)C(=O)C(=C<br>3C2=O)O)O1        | 5    | nM |
| CHEMBL2403118 | 3C2=O)O)O1                                                                                                                | 5    | nM |
| CHEMBL3360114 | CN1C(=O)C(=C(N=C1C2(C)CCCO2)C(=O)NCc3ccc(F)cc3)O                                                                          | 5    | nM |
| CHEMBL3360115 | CN1C(=O)C(=C(N=C1C2(C)CCCS2)C(=O)NCc3ccc(F)cc3)O                                                                          | 5    | nM |
| CHEMBL3360116 | CN1C(=O)C(=C(N=C1C2CCOCC2)C(=O)NCc3ccc(F)cc3)O<br>OC(=O)\C(=C\C(=O)C1=CC(=CN(Cc2ccc(F)cc2F)C1=O)Cc3ccc(F)cc3<br>F)O       | 5    | nM |
| CHEMBL2042548 | F)O                                                                                                                       | 5.5  | nM |
| CHEMBL2316121 | C[C@H](CO)NC(=O)C1=C(O)c2ncc(Cc3ccc(F)cc3)cc2N(C)C1=O                                                                     | 5.66 | nM |
| CHEMBL3310084 | CNC(=O)C1=C(O)c2ncc(Cc3ccc(F)cc3)cc2N(CC(=O)NOC)C1=O<br>CN(C)C(=O)CN1C(=O)C(=C(O)c2ncc(Cc3ccc(F)cc3)cc12)C(=O)NCC<br>O    | 5.7  | nM |
| CHEMBL3310086 | O                                                                                                                         | 5.7  | nM |

|               |                                                                      |      |    |
|---------------|----------------------------------------------------------------------|------|----|
| CHEMBL521793  | CNC(=O)C1=C(O)c2ncc(Cc3ccc(F)cc3)cc2NC1=O                            | 6    | nM |
| CHEMBL519936  | Cc1cccc(CN2CC(=C(O)C2=O)C(=O)NCc3ccc(F)cc3)c1                        | 6    | nM |
| CHEMBL462045  | CN1C(=O)C(=C(N=C1C(C)(C)NC(=O)c2c[nH]cn2)C(=O)NCc3ccc(F)cc3)O        | 6    | nM |
| CHEMBL560251  | Cn1ncc1CN2CCN3C(=O)C(=C(N=C3C2(C)C)C(=O)NCc4ccc(F)cc4)O              | 6    | nM |
| CHEMBL561467  | CC1(C)N(Cc2cncn2)CCN3C(=O)C(=C(N=C13)C(=O)NCc4ccc(F)cc4)O            | 6    | nM |
| CHEMBL560322  | CC1(C)N(Cc2cnn[nH]2)CCN3C(=O)C(=C(N=C13)C(=O)NCc4ccc(F)cc4)O         | 6    | nM |
| CHEMBL550784  | Cc1onc(CN2CCN3C(=O)C(=C(N=C3C2(C)C)C(=O)NCc4ccc(F)cc4)O)n1           | 6    | nM |
| CHEMBL564212  | CN(C)C(=O)C(=O)N1CCN2C(=O)C(=C(N=C2C1(C)C)C(=O)NCc3ccc(F)cc3)O       | 6    | nM |
| CHEMBL549831  | Cn1nnc(CN2CCN3C(=O)C(=C(N=C3C2(C)C)C(=O)NCc4ccc(F)cc4)O)n1           | 6    | nM |
| CHEMBL559306  | CN1CCN2C(=O)C(=C(N=C2C1(C)C)C(=O)NCc3ccc(F)cc3)O                     | 6    | nM |
| CHEMBL1914553 | COc1cccc1CNC(=O)C2=C(O)c3ncc(Cc4ccc(F)cc4)cc3NC2=O                   | 6    | nM |
| CHEMBL1917874 | OC1=C(C(=O)NCc2ccc(F)cc2)C(=O)N(C3CCCC3)c4ccnc14                     | 6    | nM |
| CHEMBL1917876 | OC1=C(C(=O)NCc2ccc(F)cc2)C(=O)Nc3cc(Cc4ccc(F)cc4)cnc13               | 6    | nM |
| CHEMBL2043144 | OC(=O)\C(=C\C(=O)C1=CC(=CN(Cc2ccccc2F)C1=O)Cc3ccc(F)cc3F)\O          | 6    | nM |
| CHEMBL2316123 | CN1C(=O)C(=C(O)c2ncc(Cc3ccc(F)cc3)cc12)C(=O)NC(C)(C)CO               | 6    | nM |
| CHEMBL2316128 | CN1C(=O)C(=C(O)c2ncc(Cc3ccc(F)cc3)cc12)C(=O)NCCCN4CCCC4              | 6    | nM |
| CHEMBL3360112 | CN1C(=O)C(=C(N=C1C2COCC2O)C(=O)NCc3ccc(F)cc3)O                       | 6    | nM |
| CHEMBL3360124 | CN1C(=O)C(=C(N=C1C2CCOC2)C(=O)NCc3ccc(F)cc3e4nenn4C)O                | 6    | nM |
| CHEMBL3360127 | CN1CCN(C1=O)c2cc(F)ccc2CNC(=O)C3=C(O)C(=O)N(C)C(=N3)C4CCOC4          | 6    | nM |
| CHEMBL3360132 | CN1C(=O)C(=C(N=C1C2CCOCC2)C(=O)NCc3ccc(F)cc3n4cncn4)O                | 6    | nM |
| CHEMBL3360137 | CN1C(=O)C(=C(N=C1C2CCOCC2)C(=O)NCc3ccc(F)cc3N4CC(C)(C)N(C)S4(=O)=O)O | 6    | nM |
| CHEMBL3310092 | C[C@@H](O)CNC(=O)C1=C(O)c2ncc(Cc3ccc(F)cc3)cc2N(CC(=O)N(C)C)C1=O     | 6.14 | nM |
| CHEMBL3310409 | COCCNC(=O)C1=C(O)c2ncc(Cc3ccc(F)cc3)cc2N(CC(=O)NC(C)C)C1=O           | 6.2  | nM |
| CHEMBL3310090 | CN(C)C(=O)CN1C(=O)C(=C(O)c2ncc(Cc3ccc(F)cc3)cc12)C(=O)NC(C)(C)CO     | 6.5  | nM |
| CHEMBL3310082 | CNC(=O)C1=C(O)c2ncc(Cc3ccc(F)cc3)cc2N(CC(=O)NCCOC)C1=O               | 6.8  | nM |
| CHEMBL3310079 | CNC(=O)C1=C(O)c2ncc(Cc3ccc(F)cc3)cc2N(CC(=O)NC(C)(C)C)C1=O           | 6.9  | nM |
| CHEMBL243151  | CN1CCN(CC1C2=NC(=C(O)C(=O)N2C)C(=O)NCc3ccc(F)cc3)S(=O)(=O)c4ccccc4   | 7    | nM |
| CHEMBL246744  | CNC(=O)Cc1cccc1CNC(=O)c2nc(N3CCCCS3(=O)=O)c4ccnc4c2O                 | 7    | nM |
| CHEMBL492667  | CN1C(=O)C(=C(N=C1C(C)(C)NC(=O)C)C(=O)NCc2ccc(F)cc2)O                 | 7    | nM |
| CHEMBL518491  | CN1C(=O)C(=C(N=C1C(C)(C)NC(=O)c2nccn2)C(=O)NCc3ccc(F)cc3)O           | 7    | nM |
| CHEMBL460771  | CN1C(=O)C(=C(N=C1C(C)(C)NC(=O)c2ocnc2)C(=O)NCc3ccc(F)cc3)O           | 7    | nM |
| CHEMBL561729  | CC1(C)N(CC(=O)N2CCOCC2)CCN3C(=O)C(=C(N=C13)C(=O)NCc4ccc(F)cc4)O      | 7    | nM |
| CHEMBL561987  | CC1(C)NS(=O)(=O)CN2C(=O)C(=C(N=C12)C(=O)NCc3ccc(F)cc3)O              | 7    | nM |
| CHEMBL557646  | CC1(C)N(Cc2cn[nH]c2)CCN3C(=O)C(=C(N=C13)C(=O)NCc4ccc(F)cc4)O         | 7    | nM |
| CHEMBL557308  | CC1(C)N(CC(=O)N2CCCC2)CCN3C(=O)C(=C(N=C13)C(=O)NCc4ccc(F)cc4)O       | 7    | nM |

|               |                                                                                     |      |    |
|---------------|-------------------------------------------------------------------------------------|------|----|
| CHEMBL558121  | <chem>Cn1nccc1CN2CCN3C(=O)C(=C(N=C3C2(C)C)C(=O)NCc4ccc(F)cc4)O</chem>               | 7    | nM |
| CHEMBL1914551 | <chem>COc1ccc(CNC(=O)C2=C(O)c3ncc(Cc4ccc(F)cc4)cc3NC2=O)cc1</chem>                  | 7    | nM |
| CHEMBL2316124 | <chem>CN1C(=O)C(=C(O)c2ncc(Cc3ccc(F)cc3)cc12)C(=O)NC4(CO)CCCC4</chem>               | 7    | nM |
| CHEMBL2316137 | <chem>OC1=C(C(=O)NCCN2CCOCC2)C(=O)Nc3cc(Cc4ccc(F)cc4)cnc13</chem>                   | 7    | nM |
| CHEMBL518520  | <chem>[K+].CN1C(=O)C(=C(N=C1C(C)(C)NC(=O)c2oc(C)nn2)C(=O)NCc3ccc(F)cc3)[O-]</chem>  | 7.04 | nM |
| CHEMBL3310081 | <chem>CNC(=O)C1=C(O)c2ncc(Cc3ccc(F)cc3)cc2N(CC(=O)NCC(F)(F)F)C1=O</chem>            | 7.1  | nM |
| CHEMBL3310097 | <chem>COCCNC(=O)C1=C(O)c2ncc(Cc3ccc(F)cc3)cc2N(CC(=O)NC4CC4)C1=O</chem>             | 7.3  | nM |
| CHEMBL3309903 | <chem>CNC(=O)C1=C(O)c2ncc(Cc3ccc(F)cc3)cc2N(CC(=O)N)C1=O</chem>                     | 7.6  | nM |
| CHEMBL3310414 | <chem>COCCNC(=O)C1=C(O)c2ncc(Cc3ccc(F)cc3)cc2N(CC(=O)N4CCOCC4)C1=O</chem>           | 7.6  | nM |
| CHEMBL3310095 | <chem>COCCNC(=O)C1=C(O)c2ncc(Cc3ccc(F)cc3)cc2N(CC(=O)N)C1=O</chem>                  | 7.7  | nM |
| CHEMBL3310077 | <chem>CNC(=O)C1=C(O)c2ncc(Cc3ccc(F)cc3)cc2N(CC(=O)NC(C)C)C1=O</chem>                | 7.8  | nM |
| CHEMBL3310088 | <chem>C[C@H](CO)NC(=O)C1=C(O)c2ncc(Cc3ccc(F)cc3)cc2N(CC(=O)N(C)C)C1=O</chem>        | 7.81 | nM |
| CHEMBL524164  | <chem>CN1C(=O)C(=C(N=C1C(C)(C)NS(=O)(=O)C)C(=O)NCc2ccc(F)cc2)O</chem>               | 8    | nM |
| CHEMBL460977  | <chem>CN1C(=O)C(=C(N=C1C(C)(C)NC(=O)c2csn2)C(=O)NCc3ccc(F)cc3)O</chem>              | 8    | nM |
| CHEMBL562327  | <chem>CC1(C)N(CC(=O)O)CCN2C(=O)C(=C(N=C12)C(=O)NCc3ccc(F)cc3)O</chem>               | 8    | nM |
| CHEMBL563631  | <chem>Cc1oc(CN2CCN3C(=O)C(=C(N=C3C2(C)C)C(=O)NCc4ccc(F)cc4)O)n c1</chem>            | 8    | nM |
| CHEMBL550997  | <chem>CN(C)S(=O)(=O)N1CCN2C(=O)C(=C(N=C2C1(C)C)C(=O)NCc3ccc(F)cc3)O</chem>          | 8    | nM |
| CHEMBL551808  | <chem>CN(C)C(=O)CN1CCN2C(=O)C(=C(N=C2C1(C)C)C(=O)NCc3ccc(F)cc3)O</chem>             | 8    | nM |
| CHEMBL1914554 | <chem>COc1ccc(CNC(=O)C2=C(O)c3ncc(Cc4ccc(F)cc4)cc3NC2=O)cc1OC</chem>                | 8    | nM |
| CHEMBL1914564 | <chem>OC1=C(C(=O)NCc2ccc(F)cc2)C(=O)N(CC(=O)N3CCOCC3)c4cc(Cc5ccc(F)cc5)cnc14</chem> | 8    | nM |
| CHEMBL2316138 | <chem>OC1=C(C(=O)NCCCN2CCOCC2)C(=O)Nc3cc(Cc4ccc(F)cc4)cnc13</chem>                  | 8    | nM |
| CHEMBL3310080 | <chem>CNC(=O)C1=C(O)c2ncc(Cc3ccc(F)cc3)cc2N(CC(=O)NCC4CC4)C1=O</chem>               | 8    | nM |
| CHEMBL3360129 | <chem>CN1C(=O)C(=C(N=C1C2CCOCC2)C(=O)NCc3ccc(F)cc3S(=O)(=O)C)O</chem>               | 8    | nM |
| CHEMBL3360133 | <chem>CN1C(=O)C(=C(N=C1C2CCOCC2)C(=O)NCc3ccc(F)cc3n4ncnc4C)O</chem>                 | 8    | nM |
| CHEMBL3309268 | <chem>CCNC(=O)CN1C(=O)C(=C(O)c2ncc(Cc3ccc(F)cc3)cc12)C(=O)NC</chem>                 | 8.2  | nM |
| CHEMBL3310098 | <chem>COCCNC(=O)C1=C(O)c2ncc(Cc3ccc(F)cc3)cc2N(CC(=O)NC4CC4)C1=O</chem>             | 8.5  | nM |
| CHEMBL3310094 | <chem>CN(C)C(=O)CN1C(=O)C(=C(O)c2ncc(Cc3ccc(F)cc3)cc12)C(=O)NCC</chem>              | 8.6  | nM |
| CHEMBL1773408 | <chem>N4CCOCC4</chem>                                                               | 8.8  | nM |
| CHEMBL461405  | <chem>CC(C)(O)CCc1cn(Cc2ccc(F)cc2)c3cnc4C(=O)N(O)CCc4c13</chem>                     | 9    | nM |
| CHEMBL523678  | <chem>CN(C)C(=O)C(=O)NC(C)(C)C1=NC(=C(O)C(=O)N1C)C(=O)NCc2ccc(F)c(Cl)c2</chem>      | 9    | nM |
| CHEMBL523678  | <chem>CC1=CC=CN2C(=O)C(=C(N=C12)C(=O)NCc3ccc(F)cc3)O</chem>                         | 9    | nM |
| CHEMBL564823  | <chem>CC1(C)N(Cc2csn2)CCN3C(=O)C(=C(N=C13)C(=O)NCc4ccc(F)cc4)O</chem>               | 9    | nM |
| CHEMBL552202  | <chem>CC1(C)N(Cc2cccn2)CCN3C(=O)C(=C(N=C13)C(=O)NCc4ccc(F)cc4)O</chem>              | 9    | nM |
| CHEMBL552264  | <chem>Cn1ccc(CN2CCN3C(=O)C(=C(N=C3C2(C)C)C(=O)NCc4ccc(F)cc4)O)n1</chem>             | 9    | nM |
| CHEMBL2316112 | <chem>OC1=C(C(=O)NC2CCS(=O)(=O)CC2)C(=O)Nc3cc(Cc4ccc(F)cc4)cnc13</chem>             | 9    | nM |
| CHEMBL2316130 | <chem>CCOCCNC(=O)C1=C(O)c2ncc(Cc3ccc(F)cc3)cc2NC1=O</chem>                          | 9    | nM |

|               |                                                                                                                      |      |    |
|---------------|----------------------------------------------------------------------------------------------------------------------|------|----|
| CHEMBL2316131 | CC(C)OCCNC(=O)C1=C(O)c2ncc(Cc3ccc(F)cc3)cc2NC1=O                                                                     | 9    | nM |
| CHEMBL3310096 | CNC(=O)CN1C(=O)C(=C(O)c2ncc(Cc3ccc(F)cc3)cc12)C(=O)NCCOC<br>CN1C(=O)C(=C(N=C1C2CCOC2)C(=O)NCc3ccc(F)cc3S(=O)(=O)C)   | 9    | nM |
| CHEMBL3360118 | O<br>CN1C(=O)C(=C(N=C1C2CCOC2)C(=O)NCc3ccc(F)cc3N4CCCCS4(=O)=O)O                                                     | 9    | nM |
| CHEMBL3360120 | O                                                                                                                    | 9    | nM |
| CHEMBL3360135 | CN1C(=O)C(=C(N=C1C2CCOCC2)C(=O)NCc3ccc(F)cc3c4nenn4C)O                                                               | 9    | nM |
| CHEMBL3310076 | CCCNC(=O)CN1C(=O)C(=C(O)c2ncc(Cc3ccc(F)cc3)cc12)C(=O)NC                                                              | 9.2  | nM |
| CHEMBL3309904 | CNC(=O)CN1C(=O)C(=C(O)c2ncc(Cc3ccc(F)cc3)cc12)C(=O)NC                                                                | 9.3  | nM |
| CHEMBL3309905 | CNC(=O)C1=C(O)c2ncc(Cc3ccc(F)cc3)cc2N(CC(=O)N(C)C)C1=O<br>NC(=O)c1c2C[C@H]3CCCN3C(=O)c2c(O)c4ncc(Cc5cccc(Cl)c5F)cc1  | 9.3  | nM |
| CHEMBL3805726 | 4                                                                                                                    | 9.49 | nM |
| CHEMBL32865   | Oc1c(ncc2ccnc12)C(=O)c3cc(CN4CCCS4(=O)=O)cc(Cc5ccccc5)c3                                                             | 10   | nM |
| CHEMBL216874  | Oc1nc(nc(C(=O)NCc2ccc(F)cc2)c1O)c3cccs3                                                                              | 10   | nM |
| CHEMBL232226  | Oc1nc(nc(C(=O)Nc2cc3ccccc3s2)c1O)c4cccs4                                                                             | 10   | nM |
| CHEMBL232446  | Oc1nc(nc(C(=O)NCc2ccc(Cl)c(Cl)c2)c1O)c3cccs3                                                                         | 10   | nM |
| CHEMBL240692  | CCOC(=O)c1cn2CCN(Cc3ccc(Cl)c(Cl)c3)C(=O)c2c1O                                                                        | 10   | nM |
| CHEMBL428565  | OC(=O)c1cn2CCN(Cc3cccc(Cl)c3)C(=O)c2c1O                                                                              | 10   | nM |
| CHEMBL246535  | Oc1c(nc(N2CCCS2(=O)=O)c3ccnc13)C(=O)NCc4ccccc4<br>NS(=O)(=O)c1cc(F)ccc1CNC(=O)c2nc(N3CCCS3(=O)=O)c4ccnc4c            | 10   | nM |
| CHEMBL245519  | 2O                                                                                                                   | 10   | nM |
| CHEMBL245719  | CNC(=O)c1cc(F)ccc1CNC(=O)c2nc(N3CCCS3(=O)=O)c4ccnc4c2O                                                               | 10   | nM |
| CHEMBL407651  | CN1C(=O)C(=C(N=C1C(C)(C)C)C(=O)NCc2ccc(F)cc2)O                                                                       | 10   | nM |
| CHEMBL259573  | CCOc1ccccc1CNC(=O)c2nc(nc(O)c2O)C(C)(C)C                                                                             | 10   | nM |
| CHEMBL259779  | CC(C)(C)c1nc(O)c(O)c(n1)C(=O)NCc2cccc3cc[nH]c23                                                                      | 10   | nM |
| CHEMBL259780  | CC(C)(C)c1nc(O)c(O)c(n1)C(=O)NCc2ccc(F)cc2<br>CN(C)C(=O)C(=O)NC(C)(C)C1=NC(=C(O)C(=O)N1C)C(=O)NCc2ccc                | 10   | nM |
| CHEMBL495331  | (F)cc2                                                                                                               | 10   | nM |
| CHEMBL457616  | CC(C)N1C[C@H](C)n2c3C=NN(Cc4ccc(F)cc4)C(=O)c3c(O)c2C1=O<br>CC(C)N1C[C@H](C)n2c3C(=NN(Cc4ccc(F)cc4)C(=O)c3c(O)c2C1=O) | 10   | nM |
| CHEMBL456356  | C<br>CC1(C)N(CCN2C(=O)C(=C(N=C12)C(=O)NCc3ccc(F)cc3)O)S(=O)(=O)C                                                     | 10   | nM |
| CHEMBL554737  | O                                                                                                                    | 10   | nM |
| CHEMBL1088058 | Oc1nc(nc(C(=O)NCc2cc3ccccc3s2)c1O)c4cccs4                                                                            | 10   | nM |
| CHEMBL1914552 | COc1ccccc1CNC(=O)C2=C(O)c3ncc(Cc4ccc(F)cc4)cc3NC2=O)c1                                                               | 10   | nM |
| CHEMBL2171671 | OC(=O)C1=C(O)C(=O)C(=CN1)C(=O)NCc2ccc(F)cc2                                                                          | 10   | nM |
| CHEMBL3360117 | CN1C(=O)C(=C(N=C1C2CCCCO2)C(=O)NCc3ccc(F)cc3)O<br>CN(C)S(=O)(=O)c1cc(F)ccc1CNC(=O)C2=C(O)C(=O)N(C)C(=N2)C3           | 10   | nM |
| CHEMBL3360119 | CCOC3                                                                                                                | 10   | nM |
| CHEMBL3360123 | CN1C(=O)C(=C(N=C1C2CCOC2)C(=O)NCc3ccc(F)cc3n4nncc4C)O<br>CN1C(=O)C(=C(N=C1C2CCOC2)C(=O)NCc3ccc(F)cc3N4CC(C)(C)N      | 10   | nM |
| CHEMBL3360126 | (C)S4(=O)=O)O                                                                                                        | 10   | nM |
| CHEMBL3582062 | OC(=O)\C(=C\C(=O)C1=CN(Cc2ccc(F)cc2F)c3ccccc3C1=O)\O                                                                 | 10   | nM |
| CHEMBL452588  | Oc1c(nc(N2CCCS2(=O)=O)c3ccnc13)c4nnc(Cc5ccc(F)cc5)[nH]4                                                              | 11   | nM |
| CHEMBL1773322 | ON1CCc2c(ncc3c2c(CN4CCC(F)(F)C4)cn3Cc5ccc(F)cc5)C1=O                                                                 | 11   | nM |
| CHEMBL1773324 | ON1CCc2c(ncc3c2c(COCc4ccccn4)cn3Cc5ccc(F)cc5)C1=O                                                                    | 11   | nM |
| CHEMBL2316133 | OCCNC(=O)C1=C(O)c2ncc(Cc3ccc(F)cc3)cc2NC1=O                                                                          | 11   | nM |
| CHEMBL2316139 | CN1CCN(CCCNC(=O)C2=C(O)c3ncc(Cc4ccc(F)cc4)cc3NC2=O)CC1<br>COCCNC(=O)C1=C(O)c2ncc(Cc3ccc(F)cc3)cc2N(CC(=O)NCC(F)(F)F  | 11   | nM |
| CHEMBL3310410 | )C1=O<br>CN1C(=O)C(=C(N=C1C2CCOCC2)C(=O)NCc3ccc(F)cc3N4CCCCS4(=O)=O)O                                                | 11   | nM |
| CHEMBL3360131 | O                                                                                                                    | 11   | nM |
| CHEMBL242924  | CN1CCN(CC1C2=NC(=C(O)C(=O)N2C)C(=O)NCc3ccc(F)cc3)C(=O)                                                               | 12   | nM |

|               |                                                                           |       |    |
|---------------|---------------------------------------------------------------------------|-------|----|
|               | c4cccc4                                                                   |       |    |
| CHEMBL493295  | CN(C)S(=O)(=O)NC(C)(C)C1=NC(=C(O)C(=O)N1C)C(=O)NCc2ccc(F)cc2              | 12    | nM |
| CHEMBL521567  | CCOC(=O)\C(=C\C(=O)c1cn(Cc2cccc(F)c2F)c3cccc(OC)c13)\O                    | 12    | nM |
| CHEMBL551325  | CC1(C)N(CCc2cccn2)CCN3C(=O)C(=C(N=C13)C(=O)NCc4ccc(F)cc4)O                | 12    | nM |
| CHEMBL1773323 | ON1CCc2c(ncc3c2c(COCCc4cccn4)en3Cc5ccc(F)cc5)C1=O                         | 12    | nM |
| CHEMBL3360122 | CN1C(=O)C(=C(N=C1C2CCOC2)C(=O)NCc3ccc(F)cc3n4nnc4C)O                      | 12    | nM |
| CHEMBL3360130 | CN(C)S(=O)(=O)c1cc(F)ccc1CNC(=O)C2=C(O)C(=O)N(C)C(=N2)C3CCOCC3            | 12    | nM |
| CHEMBL243365  | CN(C)S(=O)(=O)N1CCN(C)C(C1)C2=NC(=C(O)C(=O)N2C)C(=O)NCc3ccc(F)cc3         | 12.65 | nM |
| CHEMBL272194  | CC1=NN(C(=O)/C/1=C\c2cc(Cl)c(O)c(Cl)c2)c3nnn[nH]3                         | 13    | nM |
| CHEMBL552177  | Cc1noc(CN2CCN3C(=O)C(=C(N=C3C2(C)C)C(=O)NCc4ccc(F)cc4)O)n1                | 13    | nM |
| CHEMBL1773405 | ON1CCc2c(ncc3c2c(CCC(=O)O)en3Cc4ccc(F)cc4)C1=O                            | 13    | nM |
| CHEMBL1773406 | ON1CCc2c(ncc3c2c(CCCN4CCOCC4)en3Cc5ccc(F)cc5)C1=O                         | 13    | nM |
| CHEMBL1773410 | ON1CCc2c(ncc3c2c(CCC(F)(F)F)en3Cc4ccc(F)cc4)C1=O                          | 13    | nM |
| CHEMBL1773413 | CN(C)S(=O)(=O)c1cn(Cc2ccc(F)cc2)c3enc4C(=O)N(O)CCc4c13                    | 13    | nM |
| CHEMBL1917872 | OC1=C(C(=O)NCc2ccc(F)cc2)C(=O)Nc3ccnc13                                   | 13    | nM |
| CHEMBL1917875 | OC1=C(C(=O)NCc2ccc(F)cc2)C(=O)Nc3cc(Cc4cccc4)enc13                        | 13    | nM |
| CHEMBL2315829 | CN1C(=O)C(=C(O)c2ncc(Cc3ccc(F)cc3)cc12)C(=O)NCCN4CCOCC4                   | 13    | nM |
| CHEMBL3309907 | CNC(=O)C1=C(O)c2ncc(Cc3ccc(F)cc3)cc2N(CC(=O)N4CCCC4)C1=O                  | 13    | nM |
| CHEMBL3360134 | CN1C(=O)C(=C(N=C1C2CCOCC2)C(=O)NCc3ccc(F)cc3n4nncc4C)O                    | 13    | nM |
| CHEMBL394786  | CN1CCN(CC1C2=NC(=C(O)C(=O)N2C)C(=O)NCc3ccc(F)cc3)C(=O)C                   | 13.86 | nM |
| CHEMBL394251  | CN(C)C(=O)Cc1cccc1CNC(=O)c2nc(N3CCCCS3(=O)=O)c4ccnc4c2O                   | 14    | nM |
| CHEMBL476564  | CCN1CC(CC1=O)c2nc(C(=O)NCc3ccc(F)cc3)c(O)c4ncccc24                        | 14    | nM |
| CHEMBL461259  | COc1c2CNC(=O)c2c(O)c3ncc(Cc4ccc(F)cc4)cc13                                | 14    | nM |
| CHEMBL563757  | CC(=O)N1CCCCC1(C)C2=NC(=C(O)C(=O)N2)C(=O)NCc3ccc(F)cc3                    | 14    | nM |
| CHEMBL1773401 | ON1CCc2c(ncc3c2c(COCC4CCOCC4)en3Cc5ccc(F)cc5)C1=O                         | 14    | nM |
| CHEMBL1773403 | ON1CCc2c(ncc3c2c(COCCC4cccn4)en3Cc5ccc(F)cc5)C1=O                         | 14    | nM |
| CHEMBL1773407 | CN(CCCc1cn(Cc2ccc(F)cc2)c3enc4C(=O)N(O)CCc4c13)C(=O)C                     | 14    | nM |
| CHEMBL1773409 | ON1CCc2c(ncc3c2c(CCCOC4CCOCC4)en3Cc5ccc(F)cc5)C1=O                        | 14    | nM |
| CHEMBL1914562 | OC1=C(C(=O)NCc2ccc(F)cc2)C(=O)N(CC3CCCC3=O)c4cc(Cc5ccc(F)cc5)enc14        | 14    | nM |
| CHEMBL2316134 | OC1=C(C(=O)NCCN2CCCC2)C(=O)Nc3cc(Cc4ccc(F)cc4)enc13                       | 14    | nM |
| CHEMBL3125979 | ON1C(=O)C(=Cc2ccnc12)C(=O)NCc3ccc(F)c(Cl)c3                               | 14    | nM |
| CHEMBL497501  | OC(=O)\C(=C\C(=O)C1=CN(Cc2ccc(F)cc2)c3ccc(cc3C1=O)C(=O)\C=C(/O)\C(=O)O)\O | 14.28 | nM |
| CHEMBL389829  | CN1C(=O)C(=C(N=C1C2COCCN2C(=O)C)C(=O)NCc3ccc(F)cc3)O                      | 15    | nM |
| CHEMBL495332  | COC(=O)C(=O)NC(C)(C)C1=NC(=C(O)C(=O)N1C)C(=O)NCc2ccc(F)cc2                | 15    | nM |
| CHEMBL493920  | CN(C)C(=O)C(=O)N(C)C(C)(C)C1=NC(=C(O)C(=O)N1C)C(=O)NCc2ccc(F)cc2          | 15    | nM |
| CHEMBL460770  | CN1C(=O)C(=C(N=C1C(C)(C)NC(=O)c2cccn2)C(=O)NCc3ccc(F)cc3)O                | 15    | nM |
| CHEMBL550108  | CCNC(=O)N1CCN2C(=O)C(=C(N=C2C1(C)C)C(=O)NCc3ccc(F)cc3)O                   | 15    | nM |
| CHEMBL1773318 | CN(CCO)Cc1cn(Cc2ccc(F)cc2)c3enc4C(=O)N(O)CCc4c13                          | 15    | nM |
| CHEMBL1773319 | ON1CCc2c(ncc3c2c(CN4CCCC4)en3Cc5ccc(F)cc5)C1=O                            | 15    | nM |
| CHEMBL2236599 | OC(=O)\C(=C\C(=O)C1=CN(Cc2cccc(F)c2)c3cccc3C1=O)\O                        | 15    | nM |

|               |                                                                       |       |    |
|---------------|-----------------------------------------------------------------------|-------|----|
| CHEMBL550394  | CC1(C)NCCN2C(=O)C(=C(N=C12)C(=O)NCc3ccc(F)cc3)O                       | 16    | nM |
| CHEMBL1773404 | ON1CCc2c(ncc3c2c(COCc4ccccc4F)cn3Cc5ccc(F)cc5)C1=O                    | 16    | nM |
| CHEMBL2315828 | CN1C(=O)C(=C(O)c2ncc(Cc3ccc(F)cc3)cc12)C(=O)NCCCN4CCCC4=O             | 16    | nM |
| CHEMBL3360125 | CN1C(=O)C(=C(N=C1C2CCOC2)C(=O)NCc3ccc(F)cc3N4CCN(C(C)(C)C)S4(=O)=O)O  | 16    | nM |
| CHEMBL3582057 | OC(=O)\C(=C\C(=O)C1=CN(Cc2ccccc2F)c3ccccc3C1=O)\O                     | 16    | nM |
| CHEMBL406596  | Cc1ccc(cc1NC(=O)CSc2nc3ccccc3s2)C(=O)O                                | 17    | nM |
| CHEMBL558661  | OC(=O)C(=O)CC(=O)C1=CN(Cc2ccc(F)cc2)c3ccc(cc3C1=O)C(=O)C(=O)C(=O)O    | 17    | nM |
| CHEMBL1773316 | ON1CCc2c(ncc3c2ccn3Cc4ccc(F)c(Cl)c4C#N)C1=O                           | 17    | nM |
| CHEMBL1773402 | CC(C)OCCOCc1cn(Cc2ccc(F)cc2)c3cnc4C(=O)N(O)CCc4c13                    | 17    | nM |
| CHEMBL1914556 | CN1C(=O)C(=C(O)c2ncc(Cc3ccc(F)cc3)cc12)C(=O)NCc4ccc(F)cc4             | 17    | nM |
| CHEMBL3125980 | ON1C(=O)C(=Cc2cccn12)C(=O)NCc3ccc(F)c(F)c3                            | 17    | nM |
| CHEMBL3360136 | CN1C(=O)C(=C(N=C1C2CCOCC2)C(=O)NCc3ccc(F)cc3N4CCN(C(C)(C)C)S4(=O)=O)O | 17    | nM |
| CHEMBL564267  | CN1CCN(CC1(C)C2=NC(=C(O)C(=O)N2C)C(=O)NCc3ccc(F)cc3)S(=O)(=O)C        | 17.32 | nM |
| CHEMBL261833  | OC(=O)c1ccccc1NC(=O)c2ccccc2S(=O)(=O)Nc3ccc(Oc4ccccc4)cc3             | 18    | nM |
| CHEMBL481296  | OC1=C(C2CCCN2C1=O)C(=O)NCc3ccc(F)cc3                                  | 18    | nM |
| CHEMBL505332  | CN(C)C(=O)NC(C)(C)C1=NC(=C(O)C(=O)N1C)C(=O)NCc2ccc(F)cc2              | 18    | nM |
| CHEMBL492930  | OC1=C(N=C2N(C=CC=C2NC(=O)c3ccccc3)C1=O)C(=O)NCc4ccc(F)cc4             | 18    | nM |
| CHEMBL494944  | CCCN(C(=O)C(=O)N(C)C)C1=CC=CN2C(=O)C(=C(N=C12)C(=O)NCc3ccc(F)cc3)O    | 18    | nM |
| CHEMBL523833  | CCN(C(=O)c1oncc1)C2=CC=CN3C(=O)C(=C(N=C23)C(=O)NCc4ccc(F)cc4)O        | 18    | nM |
| CHEMBL1773314 | ON1CCc2c(ncc3c2ccn3Cc4ncc(F)cc4F)C1=O                                 | 18    | nM |
| CHEMBL1914557 | CCCN1C(=O)C(=C(O)c2ncc(Cc3ccccc3)cc12)C(=O)NCc4ccc(F)cc4              | 18    | nM |
| CHEMBL2171670 | COC(=O)C1=C(O)C(=O)C(=CN1)C(=O)NCc2ccc(F)cc2                          | 18    | nM |
| CHEMBL3352894 | CN1C(=O)C(=C(N=C1C2CCOC2)C(=O)NCc3ccc(F)cc3c4nncn4C)O                 | 18    | nM |
| CHEMBL3582070 | OC(=O)\C(=C\C(=O)C1=CN(Cc2ccccc(Cl)c2F)c3ccccc3C1=O)\O                | 18    | nM |
| CHEMBL243150  | CN1CCN(CC1C2=NC(=C(O)C(=O)N2C)C(=O)NCc3ccc(F)cc3)S(=O)(=O)C           | 18.17 | nM |
| CHEMBL244863  | CN1CCOCC1C2=NC(=C(O)C(=O)N2C)C(=O)NCc3ccccc(Br)c3                     | 19    | nM |
| CHEMBL492538  | CCN(CC)C(=O)C(=O)N(CC)C1=CC=CN2C(=O)C(=C(N=C12)C(=O)NCc3ccc(F)cc3)O   | 19    | nM |
| CHEMBL1914563 | OC1=C(C(=O)NCc2ccc(F)cc2)C(=O)N(CC(=O)N3CCCC3)c4cc(Cc5ccc(F)cc5)enc14 | 19    | nM |
| CHEMBL2236601 | OC(=O)\C(=C\C(=O)C1=CN(Cc2c(F)cccc2F)c3ccccc3C1=O)\O                  | 19    | nM |
| CHEMBL3360110 | CN1C(=O)C(=C(N=C1C2=CCOC2)C(=O)NCc3ccc(F)cc3)O                        | 19    | nM |
| CHEMBL3415853 | OC(=O)\C(=C\C(=O)c1cc(en1Cc2ccc(F)cc2)c3ccccc3)\O                     | 19    | nM |
| CHEMBL199145  | Oc1c(ncc2cccn12)C(=O)NCc3ccc(F)cc3                                    | 19.9  | nM |
| CHEMBL226916  | Oc1nc(nc(C(=O)NCCc2ccccc2)c1O)c3cccs3                                 | 19.95 | nM |
| CHEMBL232228  | Oc1nc(nc(C(=O)NCc2c[nH]c3ccccc23)c1O)c4cccs4                          | 19.95 | nM |
| CHEMBL232444  | Oc1nc(nc(C(=O)NCc2ccc(Cl)cc2)c1O)c3cccs3                              | 19.95 | nM |
| CHEMBL388908  | CN1C[C@@H](F)C[C@H]1C2=NC(=C(O)C(=O)N2C)C(=O)NCc3ccc(F)cc3            | 20    | nM |
| CHEMBL243377  | CN1C(=O)C(=C(N=C1C2COCCN2C(=O)OC(C)(C)C)C(=O)NCc3ccc(F)cc3)O          | 20    | nM |
| CHEMBL237728  | OC1=C(C#N)C(=O)N2CCN(Cc3ccc(F)cc3)C(=O)C2=C1O                         | 20    | nM |
| CHEMBL237942  | OC1=C(I)C(=O)N2CCN(Cc3ccc(F)cc3)C(=O)C2=C1O                           | 20    | nM |
| CHEMBL240481  | CCOC(=O)c1cn2CCN(Cc3ccc(F)c(Cl)c3)C(=O)c2c1O                          | 20    | nM |

|               |                                                                         |    |    |
|---------------|-------------------------------------------------------------------------|----|----|
| CHEMBL258681  | CN1C(=O)C(=C(N=C1C(C)(C)C)C(=O)NCc2ccc(F)cc2C(=O)N)O                    | 20 | nM |
| CHEMBL258682  | CN1C(=O)C(=C(N=C1C(C)(C)C)C(=O)NCc2ccc(F)cc2S(=O)(=O)C)O                | 20 | nM |
| CHEMBL411299  | CNC(=O)c1cc(F)ccc1CNC(=O)C2=C(O)C(=O)N(C)C(=N2)C(C)(C)C                 | 20 | nM |
| CHEMBL260665  | CN1C(=O)C(=C(N=C1C(C)(C)C)C(=O)NCc2ccc(F)cc2c3onc(C)n3)O                | 20 | nM |
| CHEMBL408075  | CN1C(=O)C(=C(N=C1C(C)(C)C)C(=O)NCc2cccc3cc[nH]c23)O                     | 20 | nM |
| CHEMBL259125  | CCOc1cccc1CNC(=O)C2=C(O)C(=O)N(C)C(=N2)C(C)(C)C                         | 20 | nM |
| CHEMBL262067  | Cc1noc(n1)c2cc(F)ccc2CNC(=O)c3nc(nc(O)c3O)C(C)(C)C                      | 20 | nM |
| CHEMBL408076  | CNC(=O)c1cc(F)ccc1CNC(=O)c2nc(nc(O)c2O)C(C)(C)C                         | 20 | nM |
| CHEMBL510093  | CN1C(=O)C(=C(N=C1C(C)(C)NC(=O)C(=O)N2CCOCC2)C(=O)NCc3ccc(F)cc3)O        | 20 | nM |
| CHEMBL461406  | CN1C(=O)C(=C(N=C1C(C)(C)NC(=O)c2ccccn2)C(=O)NCc3ccc(F)cc3)O             | 20 | nM |
| CHEMBL476357  | CN1CC(CC1=O)c2nc(C(=O)NCc3ccc(F)cc3)c(O)c4ncccc24                       | 20 | nM |
| CHEMBL523901  | COc1cccc2c1c(en2Cc3ccc(F)cc3F)C(=O)\C=C(/O)\C(=O)O                      | 20 | nM |
| CHEMBL499475  | COc1cccc2c1c(en2Cc3cc(F)ccc3F)C(=O)\C=C(/O)\C(=O)O                      | 20 | nM |
| CHEMBL456326  | ON1C(=O)Cc2ccc(NC(=O)Cc3ccc(F)cc3)cc2C1=O                               | 20 | nM |
| CHEMBL565220  | CC1(CCCCN1)C2=NC(=C(O)C(=O)N2)C(=O)NCc3ccc(F)cc3                        | 20 | nM |
| CHEMBL550202  | Cc1nc(C)c(s1)C(=O)N2CCCCC2(C)C3=NC(=C(O)C(=O)N3)C(=O)NCc4ccc(F)cc4      | 20 | nM |
| CHEMBL550674  | CC(=O)N1CCC[C@@]1(C)C2=NC(=C(O)C(=O)N2)C(=O)NCc3ccc(F)cc3               | 20 | nM |
| CHEMBL563898  | CC(=O)N1CCCCC1C2=NC(=C(O)C(=O)N2)C(=O)NCc3ccc(F)cc3                     | 20 | nM |
| CHEMBL563270  | CC1(C)NCCCN2C(=O)C(=C(N=C12)C(=O)NCc3ccc(F)cc3)O                        | 20 | nM |
| CHEMBL562595  | CN(C)S(=O)(=O)N1CCN(C)C(C)(C1)C2=NC(=C(O)C(=O)N2)C(=O)NCc3ccc(F)cc3     | 20 | nM |
| CHEMBL572902  | CC(=O)N1CCN(CC1)c2cc(C(=O)NCc3ccc(F)cc3)c(O)c4ncccc24                   | 20 | nM |
| CHEMBL573605  | CN(C(=O)C)c1cc(C(=O)NCc2ccc(F)cc2)c(O)c3ncccc13                         | 20 | nM |
| CHEMBL1222998 | OC1=C(N=C2C=CC(=CN2C1=O)N3CCOCC3)c4ncc(Cc5ccc(F)cc5)s4                  | 20 | nM |
| CHEMBL1914555 | CC(NC(=O)C1=C(O)c2ncc(Cc3cccc3)cc2NC1=O)c4cccc4                         | 20 | nM |
| CHEMBL243265  | CN1CC[C@@H](O)C[C@H]1C2=NC(=C(O)C(=O)N2)C(=O)NCc3ccc(F)cc3              | 21 | nM |
| CHEMBL394353  | CN1CCOCC1C2=NC(=C(O)C(=O)N2)C(=O)NCc3ccc(F)c(F)c3                       | 21 | nM |
| CHEMBL461652  | COc1cccc(CNC(=O)C2=C(O)C(=O)N(C)C(=N2)C(C)(C)NC(=O)C(=O)N(C)C)c1OC      | 21 | nM |
| CHEMBL492329  | CCN(C(=O)c1ccccn1)C2=CC=CN3C(=O)C(=C(N=C23)C(=O)NCc4ccc(F)cc4)O         | 21 | nM |
| CHEMBL494945  | CC(C)N(C(=O)C(=O)N(C)C)C1=CC=CN2C(=O)C(=C(N=C12)C(=O)NCc3ccc(F)cc3)O    | 21 | nM |
| CHEMBL495145  | CCN(C(=O)c1csen1)C2=CC=CN3C(=O)C(=C(N=C23)C(=O)NCc4ccc(F)cc4)O          | 21 | nM |
| CHEMBL492350  | CCN(C(=O)C(=O)N1CCCC1)C2=CC=CN3C(=O)C(=C(N=C23)C(=O)NCc4ccc(F)cc4)O     | 21 | nM |
| CHEMBL492543  | CCN(C(=O)C(=O)N1CCN(C)CC1)C2=CC=CN3C(=O)C(=C(N=C23)C(=O)NCc4ccc(F)cc4)O | 21 | nM |
| CHEMBL560185  | CN1CCN(CC1)C(=O)CN2CCN3C(=O)C(=C(N=C3C2(C)C)C(=O)NCc4ccc(F)cc4)O        | 21 | nM |
| CHEMBL551402  | CNC(=O)CN1CCN2C(=O)C(=C(N=C2C1(C)C)C(=O)NCc3ccc(F)cc3)O                 | 21 | nM |
| CHEMBL552327  | CC1(C)N(Cc2ocnn2)CCN3C(=O)C(=C(N=C13)C(=O)NCc4ccc(F)cc4)O               | 21 | nM |
| CHEMBL3360109 | CN1C(=O)C(=C(N=C1c2occc2)C(=O)NCc3ccc(F)cc3)O                           | 21 | nM |
| CHEMBL499184  | OC1=C(N=C2C=CC=CN2C1=O)C(=O)NCc3ccc(F)cc3                               | 22 | nM |
| CHEMBL1773414 | ON1CCc2c(ncc3c2c(en3Cc4ccc(F)cc4)S(=O)(=O)N5CCCC5)C1=O                  | 22 | nM |
| CHEMBL3310083 | CNC(=O)C1=C(O)c2ncc(Cc3ccc(F)cc3)cc2N(CC(=O)NCCN(C)C)C1=                | 22 | nM |



|               | O                                                           |       |    |
|---------------|-------------------------------------------------------------|-------|----|
| CHEMBL3415843 | OC(=O)\C=C\C(=O)c1cn(Cc2ccc(F)cc2)cc1c3ccccc3)\O            | 22    | nM |
| CHEMBL272642  | Cc1ccc2nc(sc2c1)c3ccc(NC(=O)\C=C\C(=O)O)cc3                 | 23    | nM |
| CHEMBL492932  | CCN(C(=O)CN1CCOCC1)C2=CC=CN3C(=O)C(=C(N=C23)C(=O)NC         | 23    | nM |
| CHEMBL2316135 | c4ccc(F)cc4)O                                               | 23    | nM |
| CHEMBL3310091 | OC1=C(C(=O)NCCCN2CCCC2)C(=O)Nc3cc(Cc4ccc(F)cc4)cnc13        | 23    | nM |
| CHEMBL492526  | CN(C)C(=O)CN1C(=O)C(=C(O)c2ncc(Cc3ccc(F)cc3)cc12)C(=O)NC4(  | 23    | nM |
| CHEMBL514836  | CO)CCCC4                                                    | 23    | nM |
| CHEMBL3415845 | OC1=C(N=C2N(C=CC=C2CNC(=O)c3ccccc3)C1=O)C(=O)NCc4ccc(F      | 24    | nM |
| CHEMBL550590  | )cc4                                                        | 24    | nM |
| CHEMBL48573   | Oc1c(nc(C2CNC(=O)C2)c3ccenc13)C(=O)NCc4ccc(F)cc4            | 24    | nM |
| CHEMBL492682  | OC(=O)\C=C\C(=O)c1ccn(Cc2ccc(F)cc2)c1)\O                    | 24    | nM |
| CHEMBL492537  | Cn1enc(CN2CCN3C(=O)C(=C(N=C3C2(C)C)C(=O)NCc4ccc(F)cc4)O)    | 25    | nM |
| CHEMBL514555  | n1                                                          | 25    | nM |
| CHEMBL1773320 | OC(=O)C(=O)CC(=O)\C=C\c1cccn1Cc2ccc(F)cc2                   | 26    | nM |
| CHEMBL3125970 | CN1CCN(CC1)C(=O)C(=O)NC(C)(C)C2=NC(=C(O)C(=O)N2C)C(=O)      | 26    | nM |
| CHEMBL414850  | NCc3ccc(F)cc3                                               | 26    | nM |
| CHEMBL394610  | CN(C)C(=O)C(=O)N(C)C1=CC=CN2C(=O)C(=C(N=C12)C(=O)NCc3       | 26    | nM |
| CHEMBL513189  | ccc(F)cc3)O                                                 | 26    | nM |
| CHEMBL1914559 | CCN1CC(CC1=O)c2nc(C(=O)NCc3ccc(F)cc3S(=O)(=O)C)c(O)c4ncccc  | 26    | nM |
| CHEMBL1914560 | 24                                                          | 26    | nM |
| CHEMBL242561  | COCCN(C)Cc1cn(Cc2ccc(F)cc2)c3enc4C(=O)N(O)CCc4c13           | 26    | nM |
| CHEMBL244520  | ON1C(=O)C(=C(O)c2ccenc12)C(=O)NCc3ccc(F)c(Cl)c3             | 27    | nM |
| CHEMBL240479  | O\C(=N/Cc1ccc(F)cc1)\c2nc(N3CCCCS3(=O)=O)c4ccenc4c2O        | 27.39 | nM |
| CHEMBL247570  | CN1CCOCC1C2=NC(=C(O)C(=O)N2C)C(=O)NCc3ccc(F)c(Cl)c3         | 28    | nM |
| CHEMBL260185  | CN(c1c2CN(Cc3ccc(F)cc3)C(=O)c2c(O)c4ncccc14)S(=O)(=O)C      | 28    | nM |
| CHEMBL26185   | Nc1ccc(CN2C(=O)C(=C(O)c3ncc(Cc4cccc4)cc23)C(=O)NCc5ccc(F)c  | 28    | nM |
| CHEMBL260185  | c5)cc1                                                      | 28    | nM |
| CHEMBL26185   | CS(=O)(=O)c1ccc(CN2C(=O)C(=C(O)c3ncc(Cc4cccc4)cc23)C(=O)N   | 28    | nM |
| CHEMBL26185   | Cc5ccc(F)cc5)cc1                                            | 28    | nM |
| CHEMBL26185   | COCCNC(=O)C1=C(O)c2ncc(Cc3ccc(F)cc3)cc2N(CC(=O)N4CCN(C)     | 28    | nM |
| CHEMBL26185   | CC4)C1=O                                                    | 28    | nM |
| CHEMBL26185   | Oc1c(ccc2ccenc12)C(=O)NCc3ccc(F)cc3                         | 30    | nM |
| CHEMBL26185   | CN1CCOCC1c2nc(O)c(O)c(n2)C(=O)NCc3ccc(F)cc3                 | 30    | nM |
| CHEMBL26185   | CN1C[C@H](C[C@H]1C2=NC(=C(O)C(=O)N2C)C(=O)NCc3ccc(F)c       | 30    | nM |
| CHEMBL26185   | c3)NS(=O)(=O)C                                              | 30    | nM |
| CHEMBL26185   | CN1CC(F)(F)C[C@H]1C2=NC(=C(O)C(=O)N2C)C(=O)NCc3ccc(F)cc     | 30    | nM |
| CHEMBL26185   | 3                                                           | 30    | nM |
| CHEMBL26185   | OC1=C(Br)C(=O)N2CCN(Cc3ccc(F)cc3)C(=O)C2=C1O                | 30    | nM |
| CHEMBL26185   | CCOC(=O)c1cn2CCN(Cc3cccc(Cl)c3)C(=O)c2c1O                   | 30    | nM |
| CHEMBL26185   | CN(C)S(=O)(=O)c1cc(F)ccc1CNC(=O)c2nc(N3CCCCS3(=O)=O)c4ccc   | 30    | nM |
| CHEMBL26185   | nc4c2O                                                      | 30    | nM |
| CHEMBL26185   | COc1ccc(OC)c2c1c(en2Cc3ccc(F)cc3)C(=O)\C=C(/O)\C(=O)O       | 30    | nM |
| CHEMBL26185   | COc1cccc2c1c(en2Cc3cccc(F)c3)C(=O)\C=C(/O)\C(=O)O           | 30    | nM |
| CHEMBL26185   | CN1CCN(C(C1)C2=NC(=C(O)C(=O)N2)C(=O)NCc3ccc(F)cc3)C(=O)     | 30    | nM |
| CHEMBL26185   | C                                                           | 30    | nM |
| CHEMBL26185   | CN1CN2C(=O)C(=C(N=C2C1(C)C)C(=O)NCc3ccc(F)cc3)O             | 30    | nM |
| CHEMBL26185   | OC(=O)C(=O)CC(=O)C1=CN(Cc2ccc(F)cc2)c3ccc(Br)cc3C1=O        | 30    | nM |
| CHEMBL26185   | CN(CCNc1cc(C(=O)NCc2ccc(F)cc2)c(O)c3ncccc13)C(=O)C          | 30    | nM |
| CHEMBL26185   | COc1cccc2c1c(en2Cc3cccc(Cl)c3)C(=O)\C=C(/O)\C(=O)O          | 30    | nM |
| CHEMBL26185   | COc1cccc2c1c(en2Cc3cccc(Cl)c3F)C(=O)\C=C(/O)\C(=O)O         | 30    | nM |
| CHEMBL26185   | OC(=O)\C=C\c1ccc2N(Cc3ccc(F)cc3)C=C(C(=O)\C=C(/O)\C(=O)O)C( | 30    | nM |
| CHEMBL26185   | =O)c2c1                                                     | 30    | nM |
| CHEMBL26185   | OC(=O)\C=C\C(=O)C1=CN(Cc2ccc(F)cc2)c3ccc(Br)cc3C1=O)\O      | 30    | nM |

|               |                                                                       |       |    |
|---------------|-----------------------------------------------------------------------|-------|----|
| CHEMBL2407280 | ON1C(=O)C(C(=O)NCc2ccccc2)c3ccccc3C1=O                                | 30    | nM |
| CHEMBL1087940 | Oc1nc(nc(C(=O)Nc2ccc3ccccc3c2)c1O)c4cccs4                             | 30.2  | nM |
| CHEMBL3805585 | Oc1c2C(=O)N3CCCN3Cc2c(C#N)c4cc(Cc5cccc(Cl)c5F)enc14                   | 30.22 | nM |
| CHEMBL498697  | OC(=O)\C(=C\C(=O)C1=CN(Cc2ccc(F)cc2)c3cc(F)ccc3C1=O)\O                | 31.62 | nM |
| CHEMBL563963  | CC1(C)NC(=O)N2C(=O)C(=C(N=C12)C(=O)NCc3ccc(F)cc3)O                    | 32    | nM |
| CHEMBL1773313 | ON1CCc2c(ncc3c2ccn3Cc4ccc(F)cn4)C1=O                                  | 32    | nM |
| CHEMBL1914550 | OC1=C(C(=O)NCc2ccc(F)cc2C(F)(F)F)C(=O)Nc3cc(Cc4ccccc4)enc13           | 32    | nM |
| CHEMBL1914561 | OC1=C(C(=O)NCc2ccc(F)cc2)C(=O)N(CCN3CCCC3=O)c4cc(Cc5cccc5)enc14       | 32    | nM |
| CHEMBL243366  | CCN1CCOCC1C2=NC(=C(O)C(=O)N2C)C(=O)NCc3ccc(F)cc3                      | 33    | nM |
| CHEMBL478239  | CN(C)C(=O)CN1CC(CC1=O)c2nc(C(=O)NCc3ccc(F)cc3)c(O)c4ncccc24           | 33    | nM |
| CHEMBL272448  | OC(=O)C1CCCCC1C(=O)Nc2ccc(Oc3cccc4ccccc34)cc2                         | 34    | nM |
| CHEMBL1914558 | OC1=C(C(=O)NCc2ccc(F)cc2)C(=O)N(CC3CC3)c4cc(Cc5ccccc5)enc14           | 34    | nM |
| CHEMBL3582056 | OC(=O)\C(=C\C(=O)C1=CN(Cc2ccccc2)c3ccccc3C1=O)\O                      | 34    | nM |
| CHEMBL386710  | CN1CCOCC1C2=NC(=C(O)C(=O)N2C)C(=O)NCc3ccc(F)cc3                       | 34.64 | nM |
| CHEMBL1258726 | OC1=C(N=C2N(C=C(C=C2N3CCOC3=O)N4CCOCC4)C1=O)c5ncc(Cc6ccc(F)cc6)[nH]5  | 35    | nM |
| CHEMBL1773321 | CN(CC1CC1)Cc2en(Cc3ccc(F)cc3)c4enc5C(=O)N(O)CCc5c24                   | 35    | nM |
| CHEMBL1917877 | OC1=C(C(=O)NCc2ccc(F)cc2Cl)C(=O)Nc3cc(Cc4ccccc4)enc13                 | 35    | nM |
| CHEMBL493335  | CCNC1=CC=CN2C(=O)C(=C(N=C12)C(=O)NCc3ccc(F)cc3)O                      | 36    | nM |
| CHEMBL522534  | CCN(C(=O)C(=O)N(C)C)C1=CC=CN2C(=O)C(=C(N=C12)C(=O)NCc3ccc(F)cc3)O     | 36    | nM |
| CHEMBL1222997 | OC1=C(N=C2N(C=C(C=C2N3CCCS3(=O)=O)N4CCOCC4)C1=O)c5ncc(Cc6ccc(F)cc6)s5 | 36    | nM |
| CHEMBL1773415 | CC1CCN(CC1)S(=O)(=O)c2en(Cc3ccc(F)cc3)c4enc5C(=O)N(O)CCc5c24          | 36    | nM |
| CHEMBL389566  | CN1CC[S+]( [O-] )CC1C2=NC(=C(O)C(=O)N2C)C(=O)NCc3ccc(F)cc3            | 37    | nM |
| CHEMBL2236588 | COc1ccccc1CN2C=C(C(=O)\C=C(/O)\C(=O)O)C(=O)c3ccccc23                  | 38    | nM |
| CHEMBL232629  | Cc1cccc(CNC(=O)c2nc(nc(O)c2O)c3cccs3)c1                               | 39.81 | nM |
| CHEMBL36070   | Oc1c(ncc2ccnc12)C(=O)c3cccc(Cc4ccccc4)c3                              | 40    | nM |
| CHEMBL209854  | Oc1c2C(=O)N(Cc3ccc(F)cc3)Cc2c(C(=O)N4CCOCC4)c5ccnc15                  | 40    | nM |
| CHEMBL237725  | OC1=CC(=O)N2C=CN(Cc3ccc(F)cc3)C(=O)C2=C1O                             | 40    | nM |
| CHEMBL237726  | OC1=CC(=O)N2CCN(Cc3ccccc(Cl)c3)C(=O)C2=C1O                            | 40    | nM |
| CHEMBL237727  | OC1=CC(=O)N2CCN(Cc3ccc(F)c(Cl)c3)C(=O)C2=C1O                          | 40    | nM |
| CHEMBL239413  | CCOC(=O)c1en2CCN(Cc3ccc(F)cc3)C(=O)c2c1O                              | 40    | nM |
| CHEMBL240058  | CCOC(=O)c1en2CCN(Cc3ccc(Cl)cc3)C(=O)c2c1O                             | 40    | nM |
| CHEMBL236409  | CNC(=O)c1en2CCN(Cc3ccc(Cl)c(Cl)c3)C(=O)c2c1O                          | 40    | nM |
| CHEMBL476565  | CC(C)N1CC(CC1=O)c2nc(C(=O)NCc3ccc(F)cc3)c(O)c4ncccc24                 | 40    | nM |
| CHEMBL497605  | COc1ccccc2c1c(cn2Cc3ccccc3F)C(=O)\C=C(/O)\C(=O)O                      | 40    | nM |
| CHEMBL563628  | CC(=O)N1CCCC1C2=NC(=C(O)C(=O)N2)C(=O)NCc3ccc(F)cc3                    | 40    | nM |
| CHEMBL572901  | CN1CCN(CC1)c2cc(C(=O)NCc3ccc(F)cc3)c(O)c4ncccc24                      | 40    | nM |
| CHEMBL572448  | CN(C)C(=O)C(=O)N(C)c1cc(C(=O)NCc2ccc(F)cc2)c(O)c3ncccc13              | 40    | nM |
| CHEMBL3125971 | ON1C(=O)C(=C(O)c2ccnc12)C(=O)NCc3ccc(F)c(F)c3                         | 40    | nM |
| CHEMBL394537  | CN1CCN(CC1C2=NC(=C(O)C(=O)N2)C(=O)NCc3ccc(F)cc3)C(=O)OC(C)C           | 41    | nM |
| CHEMBL3125981 | ON1C(=O)C(=Cc2ccnc12)C(=O)NCc3ccc(F)cc3F                              | 41    | nM |
| CHEMBL491150  | Oc1c(ncc2ccnc12)c3oc(Cc4ccc(F)cc4)nn3                                 | 42    | nM |
| CHEMBL1222999 | OC1=C(N=C2N(C=C(C=C2Br)N3CCOCC3)C1=O)c4ncc(Cc5ccc(F)cc5)s4            | 42    | nM |
| CHEMBL3087617 | OC(=O)C(=O)CC(=O)\C=C\c1cccn1Cc2ccc(F)cc2F                            | 42    | nM |

|               |                                                                                                                                      |       |    |
|---------------|--------------------------------------------------------------------------------------------------------------------------------------|-------|----|
| CHEMBL3310412 | COCCNC(=O)C1=C(O)c2ncc(Cc3ccc(F)cc3)cc2N(CC(=O)N4CCCC4)C1=O                                                                          | 42    | nM |
| CHEMBL260960  | COc1cccc(NC(=O)c2sc3NC(=O)C(=Cc3c2N)C(=O)O)c1                                                                                        | 43    | nM |
| CHEMBL1773411 | ON1CCc2c(ncc3c2c(cn3Cc4ccc(F)cc4)S(=O)(=O)N5CCOCC5)C1=O                                                                              | 43    | nM |
| CHEMBL3415846 | N\C=C/C(=O)c1cn(Cc2ccc(F)cc2)cc1c3ccccc3)\C(=O)O                                                                                     | 43    | nM |
| CHEMBL270717  | OC(=O)C1=CNc2ccc(Cc3ccc(Cl)c3F)cc2C1=O                                                                                               | 43.5  | nM |
| CHEMBL390027  | C[C@H]1C[C@H](N(C)C1)C2=NC(=C(O)C(=O)N2C)C(=O)NCc3ccc(F)cc3                                                                          | 43.59 | nM |
| CHEMBL395819  | CN1CCOCC1C2=NC(=C(O)C(=O)N2C)C(=O)NCc3ccc(F)c(Br)c3                                                                                  | 44    | nM |
| CHEMBL437940  | CNS(=O)(=O)c1cc(F)ccc1CNC(=O)c2nc(N3CCCCS3(=O)=O)c4ccnc4c2O                                                                          | 45    | nM |
| CHEMBL491538  | NC(=O)C1=C(O)c2ncc(Cc3ccc(F)cc3)cc2NC1=O                                                                                             | 45    | nM |
| CHEMBL1258050 | OC1=C(N=C2C=CC(=CN2C1=O)N3CCOCC3)c4ncc(Cc5ccc(F)cc5)[nH]4                                                                            | 45    | nM |
| CHEMBL3310411 | COCCNC(=O)C1=C(O)c2ncc(Cc3ccc(F)cc3)cc2N(CC(=O)NCCN(C)C)C1=O                                                                         | 45    | nM |
| CHEMBL497688  | OC(=O)\C(=C\C(=O)C1=CN(Cc2ccc(F)cc2)c3cc(Cl)ccc3C1=O)\O                                                                              | 45.72 | nM |
| CHEMBL272419  | OC(C(O)c1nc2cc3ccccc3cc2[nH]1)C(=O)O                                                                                                 | 46    | nM |
| CHEMBL3805532 | Oc1c2C(=O)N3CCCN3Cc2cc4cc(Cc5ccc(Cl)c5F)cnc14                                                                                        | 46.65 | nM |
| CHEMBL1258727 | OC1=C(N=C2N(C=C(C=C2N3CCCC3=O)N4CCOCC4)C1=O)c5ncc(Cc6ccc(F)cc6)[nH]5                                                                 | 47    | nM |
| CHEMBL2206768 | Oc1cc(c2CN(Cc3ccc(F)c(Cl)c3)C(=O)c2c1O)S(=O)(=O)N4CCOCC4O[C@H]1CCC[C@H]1NC(=O)C(=O)\C=C(/O)\C2=CC(=CN(Cc3ccc(cc3F)C2=O)Cc4ccc(F)cc4F | 47    | nM |
| CHEMBL2401912 | OC(=O)\C(=C\C(=O)C1=CN(Cc2ccc(F)cc2)c3ccccc3C1=O)\O                                                                                  | 48    | nM |
| CHEMBL512195  | OC(=O)\C(=C\C(=O)C1=CN(Cc2ccc(F)cc2)c3cc(Cl)c(Cl)cc3C1=O)\O                                                                          | 48.99 | nM |
| CHEMBL498713  | OC(=O)\C(=C\C(=O)C1=CN(Cc2ccc(F)cc2)c3cc(Cl)c(Cl)cc3C1=O)\O                                                                          | 49.75 | nM |
| CHEMBL35842   | Oc1c(ccc2ccnc12)C(=O)c3ccccc(Cc4ccccc4)c3                                                                                            | 50    | nM |
| CHEMBL209440  | COc1c2CN(Cc3ccc(F)cc3)C(=O)c2c(O)c4ncccc14                                                                                           | 50    | nM |
| CHEMBL386515  | CN(C)C(C)(C)c1nc(O)c(O)c(n1)C(=O)NCc2ccc(F)cc2                                                                                       | 50    | nM |
| CHEMBL430194  | CN1CC(=O)N(C)CC1C2=NC(=C(O)C(=O)N2C)C(=O)NCc3ccc(F)cc3                                                                               | 50    | nM |
| CHEMBL394782  | CN1C(=O)C(=C(N=C1C2COCCN2)C(=O)NCc3ccc(F)cc3)O                                                                                       | 50    | nM |
| CHEMBL232227  | Oc1nc(nc(C(=O)Nc2sc3ccccc23)c1O)c4cccs4                                                                                              | 50    | nM |
| CHEMBL492328  | CCN(C(=O)c1ccnc1)C2=CC=CN3C(=O)C(=C(N=C23)C(=O)NCc4cc(F)cc4)O                                                                        | 50    | nM |
| CHEMBL495144  | CCN(C(=O)c1oc(C)nn1)C2=CC=CN3C(=O)C(=C(N=C23)C(=O)NCc4ccc(F)cc4)O                                                                    | 50    | nM |
| CHEMBL559493  | Cc1nc(C)c(s1)C(=O)N2CCCCC2C3=NC(=C(O)C(=O)N3)C(=O)NCc4cc(F)cc4                                                                       | 50    | nM |
| CHEMBL1770428 | OC(=O)\C(=C\C(=O)C1=CN(Cc2ccc(F)cc2)c3ccc(OCc4ccc(F)cc4)cc3C1=O)\O                                                                   | 50    | nM |
| CHEMBL1773315 | ON1CCc2c(ncc3c2ccn3Cc4ccc(F)cc4C#N)C1=O                                                                                              | 50    | nM |
| CHEMBL3582069 | Cc1cc(C)cc(CN2C=C(C(=O)\C=C(/O)\C(=O)O)C(=O)c3ccccc23)c1                                                                             | 50    | nM |
| CHEMBL438113  | COc1cccc(CNC(=O)c2nc(nc(O)c2O)c3cccs3)c1                                                                                             | 50.12 | nM |
| CHEMBL232630  | Oc1nc(nc(C(=O)NCc2cccc(c2)c3ccccc3)c1O)c4cccs4                                                                                       | 50.12 | nM |
| CHEMBL1088059 | Oc1nc(nc(C(=O)NCc2csc3ccccc23)c1O)c4cccs4                                                                                            | 50.12 | nM |
| CHEMBL246774  | CNC(=O)c1cc(F)ccc1CNC(=O)c2ncc3ccnc3c2O                                                                                              | 51    | nM |
| CHEMBL394781  | CCNC(=O)N1CCN(C)C(C1)C2=NC(=C(O)C(=O)N2C)C(=O)NCc3ccc(F)cc3                                                                          | 52    | nM |
| CHEMBL272418  | CCOc1cc(CNc2nn[nH]n2)cc(Cl)c1OCc3ccc(Cl)cc3                                                                                          | 52    | nM |
| CHEMBL3087618 | OC(=O)C(=O)CC(=O)\C=C\c1cccn1Cc2cc(F)ccc2F                                                                                           | 52    | nM |
| CHEMBL498698  | OC(=O)\C(=C\C(=O)C1=CN(Cc2ccc(F)cc2)c3c(F)ccccc3C1=O)\O                                                                              | 53.67 | nM |
| CHEMBL2206761 | CCN(CC)S(=O)(=O)c1cc(O)c(O)c2C(=O)N(Cc3ccc(F)c(Cl)c3)Cc12                                                                            | 54    | nM |
| CHEMBL3125972 | ON1C(=O)C(=C(O)c2ccnc12)C(=O)NCc3ccc(F)cc3F                                                                                          | 55    | nM |

|               |                                                                                                                                                 |       |    |
|---------------|-------------------------------------------------------------------------------------------------------------------------------------------------|-------|----|
| CHEMBL499273  | OC(=O)\C(=C\C(=O)c1cccn1Cc2ccc(F)cc2)\O<br>CN(CC(=O)O)S(=O)(=O)c1cc(O)c(O)c2C(=O)N(Cc3ccc(F)c(Cl)c3)Cc1                                         | 57    | nM |
| CHEMBL2206770 | 2                                                                                                                                               | 58    | nM |
| CHEMBL260096  | CCOc1cc(\C=C/2\C(=NN(C2=O)c3nnn[nH]3)C)ccc1OC                                                                                                   | 59    | nM |
| CHEMBL1258049 | OC1=C(N=C2C=CC(=CN2C1=O)N3CCOCC3)c4oc(Cc5ccc(F)cc5)cn4                                                                                          | 59    | nM |
| CHEMBL3087616 | OC(=O)C(=O)CC(=O)\C=C\c1cccn1Cc2cccc(F)c2F                                                                                                      | 59    | nM |
| CHEMBL236408  | CNC(=O)c1en2CCN(Cc3ccc(Cl)cc3)C(=O)c2c1O                                                                                                        | 60    | nM |
| CHEMBL259336  | CC(C)(C)c1nc(O)c(O)c(n1)C(=O)NCc2ccc(F)cc2S(=O)(=O)C                                                                                            | 60    | nM |
| CHEMBL405927  | OC(=O)CSc1nc(cc(c2ccc(Cl)cc2)c1C#N)c3ccccc3<br>CN1CCN(C(C1)C2=NC(=C(O)C(=O)N2)C(=O)NCc3ccc(F)cc3)C(=O)                                          | 60    | nM |
| CHEMBL559494  | c4cncn4                                                                                                                                         | 60    | nM |
| CHEMBL1213726 | COc1cccc2c1c(en2Cc3ccc(F)cc3Cl)C(=O)\C=C(/O)\C(=O)O<br>CN1C[C@H](C[C@H]1C2=NC(=C(O)C(=O)N2)C(=O)NCc3ccc(F)c                                     | 60    | nM |
| CHEMBL244700  | c3)NC(=O)C<br>CN1CC[C@H](C[C@H]1C2=NC(=C(O)C(=O)N2)C(=O)NCc3ccc(F)                                                                              | 61    | nM |
| CHEMBL243655  | cc3)OCc4ccccc4                                                                                                                                  | 62    | nM |
| CHEMBL244651  | CN1CCOCC1C2=NC(=C(O)C(=O)N2)C(=O)NCc3cccc(F)c3                                                                                                  | 62    | nM |
| CHEMBL389142  | CN1CCOCC1C2=NC(=C(O)C(=O)N2)C(=O)NCc3cccc(Cl)c3                                                                                                 | 62    | nM |
| CHEMBL560265  | CN(C)CCN1CCN2C(=O)C(=C(N=C2C1(C)C)C(=O)NCc3ccc(F)cc3)O<br>Cc1cc(CN2CCN3C(=O)C(=C(N=C3C2(C)C)C(=O)NCc4ccc(F)cc4)O)o                              | 62    | nM |
| CHEMBL552176  | n1                                                                                                                                              | 62    | nM |
| CHEMBL3415847 | OC(=O)\C(=C\C(=O)\C=C\c1cc(en1Cc2ccccc2)C(=O)c3ccc(F)cc3)\O                                                                                     | 63    | nM |
| CHEMBL272193  | CCOc1cc(ccc1\C=C/2\C(=NN(C2=O)c3nnn[nH]3)C)N(CC)CC                                                                                              | 65    | nM |
| CHEMBL428570  | CN1CCOCC1C2=NC(=C(O)C(=O)N2)C(=O)NCc3ccccc3                                                                                                     | 66    | nM |
| CHEMBL409315  | OC(=O)CN1C(=O)\C(=C\2/SC(=S)N(C(Cc3ccccc3)C(=O)O)C2=O)\c4c<br>cccc14                                                                            | 66    | nM |
| CHEMBL1773412 | COCCN(C)S(=O)(=O)c1en(Cc2ccc(F)cc2)c3cnc4C(=O)N(O)CCc4c13                                                                                       | 66    | nM |
| CHEMBL3415850 | OC(=O)\C(=C\C(=O)\C=C\c1cc(en1Cc2ccc(F)cc2)c3ccccc3)\O                                                                                          | 66    | nM |
| CHEMBL562760  | CN(C)[C@@H]1CCCN2C(=O)C(=C(N=C12)C(=O)NCc3ccc(F)cc3)O                                                                                           | 69    | nM |
| CHEMBL211634  | Oc1c2C(=O)N(Cc3ccc(F)cc3)Cc2cc4ccnnc14                                                                                                          | 70    | nM |
| CHEMBL244904  | CN1CCSCC1C2=NC(=C(O)C(=O)N2)C(=O)NCc3ccc(F)cc3<br>CCCN(C(=O)c1cc(F)ccc1CNC(=O)C2=C(O)C(=O)N(C)C(=N2)C(C)(C)                                     | 70    | nM |
| CHEMBL430049  | C                                                                                                                                               | 70    | nM |
| CHEMBL408938  | CCNC(=O)c1cc(F)ccc1CNC(=O)C2=C(O)C(=O)N(C)C(=N2)C(C)(C)C<br>OC(=O)[C@@H](Cc1cc(O)c(O)cc1[N+](=O)[O-]<br>)]OC(=O)\C=C\c2cc(O)c(O)cc2[N+](=O)[O-] | 70    | nM |
| CHEMBL261703  | CN(C)C1=CC=CN2C(=O)C(=C(N=C12)C(=O)NCc3ccc(F)cc3)O                                                                                              | 70    | nM |
| CHEMBL493531  | CCOC(=O)\C(=C\C(=O)c1en(Cc2c(F)cccc2F)c3cccc(OC)c13)\O                                                                                          | 70    | nM |
| CHEMBL496380  | CCOC(=O)\C(=C\C(=O)c1en(Cc2ccc(F)c(Cl)c2)c3cccc(OC)c13)\O                                                                                       | 70    | nM |
| CHEMBL1214536 | CN1CCN(C2=CC(=CN3C(=O)C(=C(N=C23)c4ncc(Cc5ccc(F)cc5)[nH]<br>4)O)N6CCOCC6)S1(=O)=O                                                               | 70    | nM |
| CHEMBL1258617 | OC(=O)\C(=C\C(=O)C1=CC(=CN(Cc2ccccc2)C1=O)Cc3ccccc3)\O                                                                                          | 70    | nM |
| CHEMBL2042382 | Cc1ccc(CNC(=O)c2nc(nc(O)c2O)c3cccs3)cc1                                                                                                         | 70.79 | nM |
| CHEMBL277754  | Oc1nc(nc(C(=O)NCc2cccc(F)c2)c1O)c3cccs3                                                                                                         | 70.79 | nM |
| CHEMBL398211  | OC(=O)\C(=C\C(=O)C1=CN(Cc2ccc(F)cc2)c3cc(ccc3C1=O)N4CCCC4<br>)\O                                                                                | 70.99 | nM |
| CHEMBL496454  | CN1CCOCC1C2=NC(=C(O)C(=O)N2)C(=O)NCCc3ccccc3                                                                                                    | 71    | nM |
| CHEMBL428215  | CCN(CC)CCN1CCN2C(=O)C(=C(N=C2C1(C)C)C(=O)NCc3ccc(F)cc3<br>)O                                                                                    | 76    | nM |
| CHEMBL551401  | CN1C(=O)C(=C(N=C1C(C)(C)NC(=O)c2oc(C)nn2)C(=O)NCc3ccc(F)c<br>c3)O                                                                               | 77.07 | nM |
| CHEMBL254316  | CN1CCCC1C2=NC(=C(O)C(=O)N2)C(=O)NCc3ccc(F)cc3                                                                                                   | 78.74 | nM |
| CHEMBL244963  | COc1c2C(=O)N(Cc3ccc(F)cc3)C(=O)c2c(O)c4ncccc14                                                                                                  | 80    | nM |
| CHEMBL212921  |                                                                                                                                                 |       |    |

|               |                                                                                                                                           |        |    |
|---------------|-------------------------------------------------------------------------------------------------------------------------------------------|--------|----|
| CHEMBL240694  | OC(=O)c1cn2CCN(Cc3ccccc3)C(=O)c2c1O                                                                                                       | 80     | nM |
| CHEMBL396890  | CNC(=O)c1cn2CCN(Cc3ccc(F)cc3)C(=O)c2c1O                                                                                                   | 80     | nM |
| CHEMBL495540  | COc1cccc2c1c(cn2Cc3c(F)cccc3F)C(=O)\C=C(/O)\C(=O)O                                                                                        | 80     | nM |
| CHEMBL459382  | CN(c1c2CN(C)C(=O)c2c(O)c3ncc(Cc4ccc(F)cc4)cc13)S(=O)(=O)C                                                                                 | 80     | nM |
| CHEMBL554522  | C[C@]1(CCCN1)C2=NC(=C(O)C(=O)N2)C(=O)NCc3ccc(F)cc3                                                                                        | 80     | nM |
| CHEMBL2206769 | OC(=O)CNS(=O)(=O)c1cc(O)c(O)c2C(=O)N(Cc3ccc(F)c(Cl)c3)Cc12<br>CC(=O)N1CCN(CC1)c2ccc3C(=O)C(=CN(Cc4ccc(F)cc4)c3c2)C(=O)\<br>C=C(/O)\C(=O)O | 80     | nM |
| CHEMBL3238130 | Oc1nc(nc(C(=O)Nc2cccc3ccccc23)c1O)c4ccccc4                                                                                                | 80.09  | nM |
| CHEMBL234707  | CN(C)Cc1cn(Cc2ccc(F)cc2)c3cnc4C(=O)N(O)CCc4c13                                                                                            | 81     | nM |
| CHEMBL2407281 | Cc1ccc(CNC(=O)C2C(=O)N(O)C(=O)c3ccccc23)cc1                                                                                               | 84     | nM |
| CHEMBL437708  | Oc1nc(nc(C(=O)NCc2cccc2)c1O)c3ccccc3                                                                                                      | 85.11  | nM |
| CHEMBL244236  | CN1CCOCC1C2=NC(=C(O)C(=O)N2C)C(=O)NCc3ccc(F)c(C)c3                                                                                        | 86     | nM |
| CHEMBL386055  | COc1cnc2c(O)c3C(=O)N(Cc4ccc(F)cc4)Cc3c(OC)c2c1<br>CN1C(=O)C(=C(N=C1C(C)(C)C)C(=O)NCc2ccc(F)cc2C(=O)NCC(F)(<br>F)F)O                       | 90     | nM |
| CHEMBL260913  | CC(C)NC(=O)c1cc(F)ccc1CNC(=O)C2=C(O)C(=O)N(C)C(=N2)C(C)(<br>C)C                                                                           | 90     | nM |
| CHEMBL260082  | CN1CCC[C@]1(C)C2=NC(=C(O)C(=O)N2)C(=O)NCc3ccc(F)cc3                                                                                       | 90     | nM |
| CHEMBL549798  | CN1CCC[C@]1(C)C2=NC(=C(O)C(=O)N2)C(=O)NCc3ccc(F)cc3                                                                                       | 90     | nM |
| CHEMBL1213791 | COc1cccc2c1c(cn2Cc3cc(Cl)ccc3F)C(=O)\C=C(/O)\C(=O)O                                                                                       | 90     | nM |
| CHEMBL232435  | COc1ccccc1CNC(=O)c2nc(nc(O)c2O)c3ccccc3                                                                                                   | 91.2   | nM |
| CHEMBL226764  | CN1CCCC1c2nc(O)c(O)c(n2)C(=O)NCc3ccc(F)cc3                                                                                                | 91.65  | nM |
| CHEMBL480531  | OC1=C(CN(Cc2cccn2)C1=O)C(=O)NCc3ccc(F)cc3<br>OC1=C(N=C2N(C=C(C=C2N3CCCS3(=O)=O)N4CCOCC4)C1=O)c5n<br>cc(Cc6ccc(F)cc6)[nH]5                 | 94     | nM |
| CHEMBL1258504 | OC(=O)\C(=C\C(=O)C1=CN(Cc2ccc(F)c(Cl)c2)c3c(Cl)ccccc3C1=O)\O                                                                              | 95     | nM |
| CHEMBL3582072 | ON1C(=O)C(C(=O)NCc2ccc(F)cc2)c3ccccc3C1=O                                                                                                 | 96     | nM |
| CHEMBL2407287 | CN1C[C@H](O)C[C@H]1C2=NC(=C(O)C(=O)N2)C(=O)NCc3ccc(F)<br>)cc3                                                                             | 99     | nM |
| CHEMBL242137  | CN1CCN(C)C(C1)C2=NC(=C(O)C(=O)N2)C(=O)NCc3ccc(F)cc3                                                                                       | 100    | nM |
| CHEMBL244754  | CN1CCN(C)C(C1)C2=NC(=C(O)C(=O)N2)C(=O)NCc3ccc(F)cc3                                                                                       | 100    | nM |
| CHEMBL388419  | Oc1nc(nc(C(=O)Nc2ccccc2)c1O)c3ccccc3                                                                                                      | 100    | nM |
| CHEMBL237724  | OC1=CC(=O)N2CCN(Cc3ccc(F)cc3)C(=O)C2=C1O                                                                                                  | 100    | nM |
| CHEMBL481279  | OC1=C(CN(Cc2ccccc2)C1=O)C(=O)NCc3ccc(F)cc3                                                                                                | 100    | nM |
| CHEMBL498202  | COc1cccc2c1c(cn2Cc3cc(F)c(F)c(F)c3)C(=O)\C=C(/O)\C(=O)O                                                                                   | 100    | nM |
| CHEMBL512021  | ON1C(=O)Cc2ccc(NC(=O)Cc3ccccc3)cc2C1=O                                                                                                    | 100    | nM |
| CHEMBL460632  | COc1c2CN(C)C(=O)c2c(O)c3ncc(Cc4ccc(F)cc4)cc13                                                                                             | 100    | nM |
| CHEMBL516025  | OC(=O)\C(=C\C(=O)c1cc(OCc2ccccc2)cc(OCc3ccccc3)c1)\O<br>CN1CCN(C(=O)C)C(C)(C1)C2=NC(=C(O)C(=O)N2)C(=O)NCc3ccc(F)<br>)cc3                  | 100    | nM |
| CHEMBL559492  | CN1CCN(C(=O)c2nccn2)C(C)(C1)C3=NC(=C(O)C(=O)N3)C(=O)NC<br>c4ccc(F)cc4                                                                     | 100    | nM |
| CHEMBL551942  | Oc1ccc2CN(Cc3ccc(Cl)c(Cl)c3)C(=O)c2c1O                                                                                                    | 100    | nM |
| CHEMBL557899  | Oc1nc(nc(C(=O)NCc2ccccc2)c1O)c3ccccc3                                                                                                     | 100    | nM |
| CHEMBL1088620 | Oc1nc(nc(C(=O)NCc2ccccc2)c1O)c3ccccc3                                                                                                     | 100    | nM |
| CHEMBL496652  | OC(=O)\C(=C\C(=O)C1=CN(Cc2ccc(F)cc2)c3ccc(Cl)cc3C1=O)\O                                                                                   | 105.83 | nM |
| CHEMBL232437  | Cc1ccccc1CNC(=O)c2nc(nc(O)c2O)c3ccccc3                                                                                                    | 109.65 | nM |
| CHEMBL240272  | CCOC(=O)c1cn2CCN(Cc3ccccc(F)c3)C(=O)c2c1O<br>CN(C)C(=O)c1cc(F)ccc1CNC(=O)c2nc(N3CCCS3(=O)=O)c4ccccc4c<br>2O                               | 110    | nM |
| CHEMBL245717  | Oc1cc(c2CN(Cc3ccc(F)c(Cl)c3)C(=O)c2c1O)S(=O)(=O)NCCBr                                                                                     | 110    | nM |
| CHEMBL2206762 | ON1C(=O)C(C(=O)Nc2ccccc(F)c2)c3ccccc3C1=O                                                                                                 | 110    | nM |
| CHEMBL2407278 | ON1C(=O)C(C(=O)Nc2ccccc(F)c2)c3ccccc3C1=O                                                                                                 | 110    | nM |
| CHEMBL3415854 | O\C(=C/C(=O)c1cccn1Cc2ccc(F)cc2)\c3nc[nH]n3                                                                                               | 110    | nM |
| CHEMBL3582064 | OC(=O)\C(=C\C(=O)C1=CN(Cc2ccc(F)c(F)c2)c3ccccc3C1=O)\O                                                                                    | 110    | nM |

|               |                                                                    |        |    |
|---------------|--------------------------------------------------------------------|--------|----|
| CHEMBL390433  | Oc1nc(nc(C(=O)N[C@H]2CCc3ccccc23)c1O)c4cccs4                       | 110.91 | nM |
| CHEMBL562366  | Oc1ccc2C(=O)N(Cc3ccc(F)c(F)c3)C(=O)c2c1O                           | 118.32 | nM |
| CHEMBL495952  | COc1cccc2c1c(en2Cc3cccc(F)c3F)C(=O)\C=C(/O)\C(=O)O                 | 120    | nM |
| CHEMBL564984  | OC1=C(N=C(NC1=O)C2CCCN2)C(=O)NCc3ccc(F)cc3                         | 120    | nM |
| CHEMBL559753  | CCOC(=O)C(=O)CC(=O)C1=CN(Cc2ccc(F)cc2)c3ccc(Br)cc3C1=O             | 120    | nM |
| CHEMBL550776  | Oc1ccc2C(=O)N(Cc3ccc(Cl)c(Cl)c3)C(=O)c2c1O                         | 120    | nM |
| CHEMBL1213789 | COc1cccc2c1c(en2Cc3ccc(F)c(Cl)c3)C(=O)\C=C(/O)\C(=O)O              | 120    | nM |
| CHEMBL2206760 | CNS(=O)(=O)c1cc(O)c(O)c2C(=O)N(Cc3ccc(F)c(Cl)c3)Cc12               | 120    | nM |
| CHEMBL478452  | CN1CC(CC1=O)c2nc(C(=O)NCc3ccc(F)cc3S(=O)(=O)C)c(O)c4ncccc2         | 123    | nM |
| CHEMBL2407273 | COc1ccc(CCNC(=O)C2C(=O)N(O)C(=O)c3ccccc23)cc1OC                    | 126    | nM |
| CHEMBL389093  | Oc1nc(nc(C(=O)NCc2ccccc2c3ccccc3)c1O)c4cccs4                       | 128.82 | nM |
| CHEMBL3805531 | Oc1c2C(=O)N3CCC[C@H]3c2c(C#N)c4cc(Cc5cccc(Cl)c5F)enc14             | 128.84 | nM |
| CHEMBL227497  | Oc1nc(nc(C(=O)NCc2ccc(F)cc2)c1O)C3CCCCN3                           | 130    | nM |
| CHEMBL389332  | CN1C[C@H](C[C@H]1C2=NC(=C(O)C(=O)N2C)C(=O)NCc3ccc(F)cc3)OCc4ccccc4 | 130    | nM |
| CHEMBL242609  | CC(C)N1CCN(C)C(C1)C2=NC(=C(O)C(=O)N2C)C(=O)NCc3ccc(F)cc3           | 130    | nM |
| CHEMBL455437  | Oc1c(ncc2ccnc12)c3noc(Cc4ccc(F)cc4)n3                              | 130    | nM |
| CHEMBL522630  | Oc1c(ncc2ccnc12)c3nnc(Cc4ccc(F)cc4)[nH]3                           | 130    | nM |
| CHEMBL523974  | Oc1c(ncc2ccnc12)c3oc(Cc4ccccc4)nn3                                 | 130    | nM |
| CHEMBL492727  | CNC1=CC=CN2C(=O)C(=C(N=C12)C(=O)NCc3ccc(F)cc3)O                    | 130    | nM |
| CHEMBL584772  | OC(=O)\C(=C\C(=O)c1csc(Cc2ccccc2)c1)\O                             | 130    | nM |
| CHEMBL1213787 | COc1cccc2c1c(en2Cc3c(F)cccc3Cl)C(=O)\C=C(/O)\C(=O)O                | 130    | nM |
| CHEMBL2171665 | COCCNC(=O)C1=C(O)C(=O)C(=CN1)C(=O)NCc2ccc(F)cc2                    | 130    | nM |
| CHEMBL3582073 | OC(=O)\C(=C\C(=O)C1=CN(Cc2ccccc2F)c3c(Cl)cccc3C1=O)\O              | 130    | nM |
| CHEMBL3805269 | Oc1c2C(=O)N3CCCC[C@H]3c2c(C#N)c4cc(Cc5cccc(Cl)c5F)enc14            | 138.56 | nM |
| CHEMBL397268  | CN1CCS(=O)(=O)CC1C2=NC(=C(O)C(=O)N2C)C(=O)NCc3ccc(F)cc3            | 140    | nM |
| CHEMBL244235  | COc1cccc(CNC(=O)C2=C(O)C(=O)N(C)C(=N2)C3COCCN3C)c1                 | 140    | nM |
| CHEMBL573637  | COc1cccc(Cc2cccc(c2)C(=O)\C=C(/O)\C(=O)O)c1                        | 140    | nM |
| CHEMBL2236603 | COc1cccc(CN2C=C(C(=O)C=C(/O)\C(=O)O)C(=O)c3ccccc23)c1              | 140    | nM |
| CHEMBL2297147 | CC(C)C1=NC(=C(O)C(=O)N1C)C(=O)NCc2ccc(F)cc2                        | 140    | nM |
| CHEMBL1289430 | CN(O)C(=O)c1cc2c(CO)cn(Cc3ccc(F)cc3)c2cn1                          | 145    | nM |
| CHEMBL572414  | COc1ccc(Cc2cccc(c2)C(=O)\C=C(/O)\C(=O)O)cc1                        | 150    | nM |
| CHEMBL3087619 | OC(=O)C(=O)CC(=O)\C=C\c1cccn1Cc2c(F)cccc2F                         | 150    | nM |
| CHEMBL437361  | C[C@H](NC(=O)c1nc(nc(O)c1O)c2cccs2)c3ccc4ccccc4c3                  | 156.67 | nM |
| CHEMBL253342  | Oc1ccc2CN(Cc3ccc(F)c(Cl)c3)C(=O)c2c1O                              | 160    | nM |
| CHEMBL526283  | COc1cccc2c1c(en2Cc3c(F)ccc(F)c3F)C(=O)\C=C(/O)\C(=O)O              | 160    | nM |
| CHEMBL232445  | Oc1nc(nc(C(=O)NCc2ccccc2F)c1O)c3cccs3                              | 162.18 | nM |
| CHEMBL50605   | OC(=O)C(=O)CC(=O)c1cccn1Cc2ccc(F)cc2                               | 164.32 | nM |
| CHEMBL492524  | OC1=C(N=C2N(C=CC=C2CN3CCOCC3)C1=O)C(=O)NCc4ccc(F)cc4               | 170    | nM |
| CHEMBL559284  | Oc1ccc2C(=O)N(Cc3ccc(F)c(Cl)c3)C(=O)c2c1O                          | 170    | nM |
| CHEMBL1258167 | OC1=C(N=C2N(C=C(C=C2)N3CCOCC3)C1=O)c4oc(Cc5ccc(F)cc5)c             | 170    | nM |
| CHEMBL3087330 | n4                                                                 | 170    | nM |
| CHEMBL3087628 | OC(=O)C(=O)CC(=O)\C=C\c1cccn1Cc2c(Cl)cccc2Cl                       | 170    | nM |
| CHEMBL389141  | Cc1ccccc1Cn2cccc2\C=C\C(=O)CC(=O)C(=O)O                            | 170    | nM |
| CHEMBL3805498 | CN1CCOCC1C2=NC(=C(O)C(=O)N2C)C(=O)NCc3ccccc3F                      | 175    | nM |
| CHEMBL389331  | Oc1c2C(=O)N3CCC[C@H]3c2c(C#N)c4cc(Cc5cccc(Cl)c5F)enc14             | 178.27 | nM |
| CHEMBL410444  | CO[C@H]1C[C@H](N(C)C1)C2=NC(=C(O)C(=O)N2C)C(=O)NCc3ccc(F)cc3       | 180    | nM |
| CHEMBL410444  | CN(C)C(=O)c1cc(F)ccc1CNC(=O)C2=C(O)C(=O)N(C)C(=N2)C(C)(C)          | 180    | nM |

|               | C                                                                    |        |    |
|---------------|----------------------------------------------------------------------|--------|----|
| CHEMBL572471  | OC(=O)\C(=C\C(=O)C1C=CSC1Cc2ccccc2)\O                                | 180    | nM |
| CHEMBL492525  | CC(=O)N1CCN(CC2=CC=CN3C(=O)C(=C(N=C23)C(=O)NCc4ccc(F)cc4)O)CC1       | 185    | nM |
| CHEMBL494946  | CCN(C(=O)CN(C)C)C1=CC=CN2C(=O)C(=C(N=C12)C(=O)NCc3ccc(F)cc3)O        | 185    | nM |
| CHEMBL211110  | Oc1c2C(=O)N(Cc3ccc(F)cc3)Cc2c(C(=O)NCc4cccn4)c5ccnc15                | 190    | nM |
| CHEMBL261714  | COc1cccc2c(en(Cc3ccc(F)cc3)c12)C(=O)\C=C(/O)\C(=O)O                  | 190    | nM |
| CHEMBL2206767 | NCCN1CCN(CC1)S(=O)(=O)c2cc(O)c(O)c3C(=O)N(Cc4ccc(F)c(Cl)c4)Cc23      | 190    | nM |
| CHEMBL2206773 | CC(C)c1c(O)c(O)c2C(=O)N(Cc3ccc(F)c(Cl)c3)Cc2c1S(=O)(=O)N(C)C         | 190    | nM |
| CHEMBL3582071 | OC(=O)\C(=C\C(=O)C1=CN(Cc2ccc(F)c(Cl)c2)c3ccccc3C1=O)\O              | 190    | nM |
| CHEMBL3736106 | CCOC(=O)C1=C(C)N(Cc2ccc(cc2)C(=O)\C=C(/O)\C(=O)O)C(=O)N=C1Cc3ccccc3  | 190    | nM |
| CHEMBL1088621 | Oc1nc(nc(C(=O)NCc2nccs2)c1O)c3cccs3                                  | 199.53 | nM |
| CHEMBL242353  | CCO[C@H]1C[C@H](N(C)C1)C2=NC(=C(O)C(=O)N2C)C(=O)NCc3ccc(F)cc3        | 200    | nM |
| CHEMBL427698  | CN1CCNCC1C2=NC(=C(O)C(=O)N2C)C(=O)NCc3ccc(F)cc3                      | 200    | nM |
| CHEMBL232025  | Oc1nc(nc(C(=O)Nc2nccs2)c1O)c3cccs3                                   | 200    | nM |
| CHEMBL458279  | OCCN1C=C(C(=O)O)C(=O)c2cc(Cc3ccc(Cl)cc3Cl)ccc12                      | 200    | nM |
| CHEMBL559852  | Oc1ccc2C(=O)N(Cc3ccccc(F)c3F)C(=O)c2c1O                              | 200    | nM |
| CHEMBL2180587 | Oc1c(nc(NCCCCCNC=O)c2ccnc12)C(=O)NCc3ccc(F)cc3                       | 200    | nM |
| CHEMBL2407272 | ON1C(=O)C(C(=O)NCCc2ccc(F)cc2)c3ccccc3C1=O                           | 200    | nM |
| CHEMBL234922  | CN(C(=O)c1nc(nc(O)c1O)c2cccs2)c3ccccc4ccccc34                        | 210    | nM |
| CHEMBL427715  | Oc1ccc(cc1O)S(=O)(=O)N(N2Cc3ccc(O)c(O)c3C2=O)S(=O)(=O)c4ccc(O)c(O)c4 | 210    | nM |
| CHEMBL407451  | CN1CCCC1c2nc(O)c(O)c(n2)C(=O)NCc3ccc(F)cc3                           | 220    | nM |
| CHEMBL240057  | CCOC(=O)c1en2CCN(Cc3ccccc3)C(=O)c2c1O                                | 220    | nM |
| CHEMBL261541  | COc1ccc2c(en(Cc3ccc(F)cc3)c2c1)C(=O)\C=C(/O)\C(=O)O                  | 220    | nM |
| CHEMBL573644  | OC(=O)\C(=C\C(=O)c1cccn1Cc2ccccc2)\O                                 | 220    | nM |
| CHEMBL3582065 | OC(=O)\C(=C\C(=O)C1=CN(Cc2cc(F)cc(F)c2)c3ccccc3C1=O)\O               | 220    | nM |
| CHEMBL1257823 | OC1=C(N=C2C=CC(=CN2C1=O)N3CCOCC3)c4nnc(Cc5ccc(F)cc5)s4               | 225    | nM |
| CHEMBL237083  | OC1=CC(=O)N2CCN(Cc3ccccc3)C(=O)C2=C1O                                | 230    | nM |
| CHEMBL261106  | CN1C(=O)C(=C(N=C1C(C)(C)C)C(=O)NCc2ccc(F)cc2C(=O)N3CCCC3)O           | 230    | nM |
| CHEMBL493291  | CN(C)C(C)(C)C1=NC(=C(O)C(=O)N1C)C(=O)NCc2ccc(F)cc2                   | 230    | nM |
| CHEMBL564147  | Oc1ccc2C(=O)N(Cc3cc(F)ccc3F)C(=O)c2c1O                               | 230    | nM |
| CHEMBL524066  | COc1cccc2c1c(en2Cc3cc(F)cc(F)c3)C(=O)\C=C(/O)\C(=O)O                 | 240    | nM |
| CHEMBL2203322 | CN(C)CCNS(=O)(=O)c1cc(O)c(O)c2C(=O)N(Cc3ccc(F)c(Cl)c3)Cc12           | 240    | nM |
| CHEMBL1289543 | COc1en(Cc2ccc(F)cc2)c3enc(cc13)C(=O)N(C)O                            | 242    | nM |
| CHEMBL2180590 | C[C@H](CO)Nc1nc(C(=O)NCc2ccc(F)cc2)c(O)c3ncccc13                     | 244.95 | nM |
| CHEMBL214371  | CN(C)S(=O)(=O)Oc1c2CN(Cc3ccc(F)cc3)C(=O)c2c(O)c4ncccc14              | 250    | nM |
| CHEMBL394536  | CCN1CCN(C)C(C1)C2=NC(=C(O)C(=O)N2C)C(=O)NCc3ccc(F)cc3                | 250    | nM |
| CHEMBL549309  | CN1CCCC1(C)C2=NC(=C(O)C(=O)N2)C(=O)NCc3ccc(F)cc3                     | 250    | nM |
| CHEMBL572473  | OC(=O)\C(=C\C(=O)c1cccc(Cc2ccccc(F)c2)c1)\O                          | 250    | nM |
| CHEMBL567841  | CN(O)C(=O)c1cc2ccn(Cc3ccc(F)cc3)c2en1                                | 250    | nM |
| CHEMBL578867  | CN(O)C(=O)c1cc2ccn(Cc3ccc(F)cc3F)c2en1                               | 250    | nM |
| CHEMBL1213790 | COc1cccc2c1c(en2Cc3cc(F)cc(Cl)c3)C(=O)\C=C(/O)\C(=O)O                | 250    | nM |
| CHEMBL2206228 | CN(C)S(=O)(=O)c1ccc(cc1)c2c(O)c(O)c3C(=O)N(Cc4ccc(F)c(Cl)c4)C        | 250    | nM |
| CHEMBL2236600 | c3c2S(=O)(=O)N(C)C                                                   | 250    | nM |
| CHEMBL2236600 | CCOC(=O)\C(=C\C(=O)C1=CN(Cc2c(F)cccc2F)c3ccccc3C1=O)\O               | 250    | nM |
| CHEMBL1289757 | CC(C)NC(=O)c1nc(Cc2ccc(F)cc2)c3ncc(cc13)C(=O)N(C)O                   | 251    | nM |

|               |                                                                            |        |    |
|---------------|----------------------------------------------------------------------------|--------|----|
| CHEMBL2407283 | <chem>COc1ccc(CNC(=O)C2C(=O)N(O)C(=O)c3ccccc23)c(OC)c1</chem>              | 254    | nM |
| CHEMBL2407286 | <chem>ON1C(=O)C(C(=O)NCc2ccc(O)c(O)c2)c3ccccc3C1=O</chem>                  | 258    | nM |
| CHEMBL206604  | <chem>CC(C)[C@@H](CO)N1C=C(C(=O)O)C(=O)c2cc(Cc3cccc(Cl)c3F)ccc1</chem>     | 259.31 | nM |
| CHEMBL2206227 | <chem>CN(C)S(=O)(=O)c1c(O)c(O)c(O)c2C(=O)N(Cc3ccc(F)c(Cl)c3)Cc12</chem>    | 260    | nM |
| CHEMBL517854  | <chem>CN(c1c2CN(C)C(=O)c2c(O)c3ncc(Cc4ccc(F)c(Cl)c4)cc13)S(=O)(=O)C</chem> | 265    | nM |
| CHEMBL409643  | <chem>COc1ccc2c(c1)c(en2Cc3ccc(F)cc3)C(=O)\C=C(/O)\C(=O)O</chem>           | 270    | nM |
| CHEMBL1213727 | <chem>COc1cccc2c1c(en2Cc3cc(F)ccc3Cl)C(=O)\C=C(/O)\C(=O)O</chem>           | 270    | nM |
| CHEMBL3582067 | <chem>OC(=O)\C(=C\C(=O)C1=CN(Cc2c(Cl)cccc2Cl)c3ccccc3C1=O)\O</chem>        | 270    | nM |
| CHEMBL2407277 | <chem>COc1ccc(NC(=O)C2C(=O)N(O)C(=O)c3ccccc23)cc1Cl</chem>                 | 277    | nM |
| CHEMBL521569  | <chem>COc1cccc2c1c(en2Cc3ccc(F)c(F)c3F)C(=O)\C=C(/O)\C(=O)O</chem>         | 280    | nM |
| CHEMBL3582039 | <chem>CCOC(=O)\C(=C\C(=O)C1=CN(Cc2ccccc2F)c3ccccc3C1=O)\O</chem>           | 280    | nM |
| CHEMBL204656  | <chem>COc1cc2N(C=C(C(=O)O)C(=O)c2cc1Cc3cccc(Cl)c3F)[C@H](CO)C(C</chem>     | 293.94 | nM |
| CHEMBL2407274 | <chem>)C</chem>                                                            |        |    |
| CHEMBL2407274 | <chem>ON1C(=O)C(C(=O)NCCc2ccc(O)c(O)c2)c3ccccc3C1=O</chem>                 | 296    | nM |
| CHEMBL497672  | <chem>OC(=O)\C=C\c1ccc(O)c2OC3C(C(=O)c4cc(O)c(O)cc34)c12</chem>            | 300    | nM |
| CHEMBL564630  | <chem>Oc1ccc2C(=O)N(Cc3cccc(F)c3)C(=O)c2c1O</chem>                         | 300    | nM |
| CHEMBL552566  | <chem>Oc1ccc2C(=O)N(Cc3ccc(F)cc3F)C(=O)c2c1O</chem>                        | 300    | nM |
| CHEMBL563256  | <chem>Oc1ccc2CN(Cc3cc(F)cc(F)c3)C(=O)c2c1O</chem>                          | 300    | nM |
| CHEMBL2171666 | <chem>OCCNC(=O)C1=C(O)C(=O)C(=CN1)C(=O)NCc2ccc(F)cc2</chem>                | 300    | nM |
| CHEMBL2180589 | <chem>OCCNc1nc(C(=O)NCc2ccc(F)cc2)c(O)c3ncccc13</chem>                     | 300    | nM |
| CHEMBL2407285 | <chem>COc1ccc(CNC(=O)C2C(=O)N(O)C(=O)c3ccccc23)cc1OC</chem>                | 307    | nM |
| CHEMBL1289651 | <chem>CCOCCOCc1en(Cc2ccc(F)cc2)c3nc(cc13)C(=O)N(C)O</chem>                 | 308    | nM |
| CHEMBL551568  | <chem>Oc1ccc2C(=O)N(Cc3cc(Cl)ccc3F)C(=O)c2c1O</chem>                       | 310    | nM |
| CHEMBL1257699 | <chem>OC1=C(N=C2C=CC(=CN2C1=O)N3CCOCC3)c4oc(Cc5ccc(F)cc5)nn4</chem>        | 310    | nM |
| CHEMBL2206764 | <chem>Oc1cc(c2CN(Cc3ccc(F)c(Cl)c3)C(=O)c2c1O)S(=O)(=O)NCCN4CCNC</chem>     | 310    | nM |
| CHEMBL3087332 | <chem>C4</chem>                                                            |        |    |
| CHEMBL3087332 | <chem>OC(=O)C(=O)CC(=O)\C=C\c1cccn1Cc2cccc(Cl)c2</chem>                    | 310    | nM |
| CHEMBL3087337 | <chem>CCOc1cccc1Cn2cccc2\C=C\C(=O)CC(=O)C(=O)O</chem>                      | 310    | nM |
| CHEMBL1289542 | <chem>CN(O)C(=O)c1cc2c(COC3CCOCC3)en(Cc4ccc(F)cc4)c2cn1</chem>             | 313    | nM |
| CHEMBL1289756 | <chem>CN(O)C(=O)c1cc2c(en(Cc3ccc(F)cc3)c2cn1)C(=O)N4CCC[C@@H]4C</chem>     | 319    | nM |
| CHEMBL2206763 | <chem>O</chem>                                                             |        |    |
| CHEMBL2206763 | <chem>Oc1cc(c2CN(Cc3ccc(F)c(Cl)c3)C(=O)c2c1O)S(=O)(=O)NCCN4CCOC</chem>     | 320    | nM |
| CHEMBL379382  | <chem>C4</chem>                                                            |        |    |
| CHEMBL379382  | <chem>Oc1c2C(=O)N(Cc3ccc(F)cc3)Cc2c(c4c(F)cccc4F)c5cccn15</chem>           | 330    | nM |
| CHEMBL564495  | <chem>OC(=O)\C(=C\C(=O)c1cccc(CN=[N+]=[N-])c1)\O</chem>                    | 330    | nM |
| CHEMBL1289864 | <chem>CN(O)C(=O)c1cc2c(CCCO)en(Cc3ccc(F)cc3)c2cn1</chem>                   | 340    | nM |
| CHEMBL524807  | <chem>OC(=O)\C(=C\C(=O)C1=CN(Cc2ccc(F)cc2)c3c(Cl)cccc3C1=O)\O</chem>       | 342.49 | nM |
| CHEMBL378395  | <chem>CCOC(=O)c1cccc1c2c3CN(Cc4ccc(F)cc4)C(=O)c3c(O)c5ncccc25</chem>       | 350    | nM |
| CHEMBL492770  | <chem>OC(=O)\C(=C\C(=O)c1cccc(OCc2ccccc2)c1)\O</chem>                      | 350    | nM |
| CHEMBL455438  | <chem>Oc1c(ncc2cccn12)c3nnc(Cc4ccccc4)[nH]3</chem>                         | 360    | nM |
| CHEMBL504621  | <chem>CCOC(=O)\C(=C\C(=O)C1=CN(Cc2ccc(F)cc2)c3ccc(F)cc3C1=O)\O</chem>      | 365.24 | nM |
| CHEMBL268633  | <chem>OC1=CC(=O)N2CCN(Cc3ccccc3Cl)C(=O)C2=C1O</chem>                       | 370    | nM |
| CHEMBL2206765 | <chem>Oc1cc(c2CN(Cc3ccc(F)c(Cl)c3)C(=O)c2c1O)S(=O)(=O)NCc4cccn4</chem>     | 370    | nM |
| CHEMBL389930  | <chem>OC(=O)C(=O)CC(=O)c1cc2ccccc2c3ccccc13</chem>                         | 380    | nM |
| CHEMBL394890  | <chem>OC1=CC(=O)N2CCN(Cc3ccc(Cl)cc3)C(=O)C2=C1O</chem>                     | 380    | nM |
| CHEMBL2171667 | <chem>NC(=O)C1=C(O)C(=O)C(=CN1)C(=O)NCc2ccc(F)cc2</chem>                   | 380    | nM |
| CHEMBL1289431 | <chem>COCCOCc1en(Cc2ccc(F)cc2)c3nc(cc13)C(=O)N(C)O</chem>                  | 382    | nM |
| CHEMBL1289200 | <chem>CN(O)C(=O)c1cc2c(CN3CCNC(=O)C3)en(Cc4ccc(F)cc4)c2cn1</chem>          | 388    | nM |
| CHEMBL550494  | <chem>Oc1ccc2C(=O)N(Cc3ccccc3)C(=O)c2c1O</chem>                            | 394.97 | nM |
| CHEMBL496379  | <chem>CCOC(=O)\C(=C\C(=O)c1cn(Cc2cc(F)ccc2F)c3cccc(OC)c13)\O</chem>        | 400    | nM |



|               |                                                                                             |        |    |
|---------------|---------------------------------------------------------------------------------------------|--------|----|
| CHEMBL560644  | <chem>Oc1ccc2C(=O)N(Cc3cc(Cl)c(F)cc3F)C(=O)c2c1O</chem>                                     | 400    | nM |
| CHEMBL549966  | <chem>Oc1ccc2C(=O)N(Cc3cccc(Cl)c3)C(=O)c2c1O</chem>                                         | 400    | nM |
| CHEMBL569375  | <chem>Oc1ccc2C(=O)N(Cc3cccc(Br)c3)C(=O)c2c1O</chem>                                         | 400    | nM |
| CHEMBL551559  | <chem>Oc1ccc2C(=O)N(Cc3cc(F)cc(F)c3)C(=O)c2c1O</chem>                                       | 400    | nM |
| CHEMBL2206759 | <chem>CN(C)S(=O)(=O)c1ccc(cc1)c2cc3CN(Cc4ccc(F)c(Cl)c4)C(=O)c3c(O)c2O</chem>                | 400    | nM |
| CHEMBL2206766 | <chem>CN1CCN(CC1)S(=O)(=O)c2cc(O)c(O)c3C(=O)N(Cc4ccc(F)c(Cl)c4)Cc23</chem>                  | 400    | nM |
| CHEMBL3582082 | <chem>OC(=O)\C(=C\C(=O)C1=CN(Cc2ccc3ccccc3n2)c4ccccc4C1=O)\O</chem>                         | 400    | nM |
| CHEMBL541369  | <chem>COc1c2CCc3cc4C=NN(C(=O)c4c(O)c3c2c(O)c5C(=O)c6cc(O)c(C)c(O)c6C(=O)c15)c7ccccc7</chem> | 410    | nM |
| CHEMBL2206774 | <chem>CC(C)c1c(O)c(O)c2C(=O)N(Cc3ccc(F)c(Cl)c3)Cc2c1S(=O)(=O)N4CCOCC4</chem>                | 410    | nM |
| CHEMBL3415832 | <chem>CCOC(=O)\C(=C\C(=O)c1cn(Cc2ccc(F)cc2)cc1c3ccccc3)\O</chem>                            | 420    | nM |
| CHEMBL216389  | <chem>CN1CCCC1C2=NC(=C(O)C(=O)N2C)C(=O)NCc3ccc(F)cc3</chem>                                 | 440    | nM |
| CHEMBL1257700 | <chem>OC1=C(N=C2C=CC(=CN2C1=O)N3CCOCC3)c4noc(Cc5ccc(F)cc5)n4</chem>                         | 450    | nM |
| CHEMBL3087621 | <chem>CCOC(=O)C(=O)CC(=O)\C=C\c1cccn1Cc2cc(F)ccc2F</chem>                                   | 450    | nM |
| CHEMBL3582059 | <chem>OC(=O)\C(=C\C(=O)C1=CN(Cc2ccc(O)cc2)c3ccccc3C1=O)\O</chem>                            | 450    | nM |
| CHEMBL574315  | <chem>OC(=O)\C(=C\C(=O)c1cc(CN=[N+]=[N-])cc(CN=[N+]=[N-])c1)\O</chem>                       | 460    | nM |
| CHEMBL3741323 | <chem>COc1ccc(cc1)C2=Cc3ccc(cc3C(CC(=O)C)N2c4ccc(F)cc4)[N+](=O)[O-]</chem>                  | 460    | nM |
| CHEMBL401801  | <chem>CN1CCN(CC1)C(=O)c2cc(F)ccc2CNC(=O)C3=C(O)C(=O)N(C)C(=N3)C(C)(C)C</chem>               | 490    | nM |
| CHEMBL3087624 | <chem>CCOC(=O)C(=O)CC(=O)\C=C\c1cccn1Cc2cc(F)cc(F)c2</chem>                                 | 490    | nM |
| CHEMBL403574  | <chem>Oc1cccc(C(=O)NNC(=O)c2ccccc2O)c1O</chem>                                              | 500    | nM |
| CHEMBL560202  | <chem>Oc1ccc2CN(Cc3ccc(F)cc3F)C(=O)c2c1O</chem>                                             | 500    | nM |
| CHEMBL563552  | <chem>Oc1ccc2C(=O)N(Cc3cc(F)c(F)cc3F)C(=O)c2c1O</chem>                                      | 500    | nM |
| CHEMBL582913  | <chem>OC(=O)\C(=C\C(=O)c1cccn1CCc2ccccc2)\O</chem>                                          | 500    | nM |
| CHEMBL573874  | <chem>OC(=O)\C(=C\C(=O)c1ccc(Cc2ccccc2)s1)\O</chem>                                         | 500    | nM |
| CHEMBL2180599 | <chem>Oc1c(nc(Br)c2ccnc12)C(=O)NCc3ccc(F)cc3</chem>                                         | 500    | nM |
| CHEMBL3334637 | <chem>Cc1ccc(CNC(=O)C2=C(O)C(=O)NC(=N2)c3ccc(F)cc3)cc1C</chem>                              | 500    | nM |
| CHEMBL1289652 | <chem>CN(O)C(=O)c1cc2c(cnc(Cc3ccc(F)cc3)c2cn1)C(=O)NCCN4CCOCC4</chem>                       | 503    | nM |
| CHEMBL1289312 | <chem>CN(O)C(=O)c1cc2c(CN3CCC[C@H]3C(=O)N)cn(Cc4ccc(F)cc4)c2cn1</chem>                      | 509.93 | nM |
| CHEMBL3415841 | <chem>CCOC(=O)\C(=C\C(=O)c1cccn1Cc2ccc(F)cc2)\O</chem>                                      | 510    | nM |
| CHEMBL3582060 | <chem>COc1ccc(CN2C=C(C(=O)\C=C(/O)\C(=O)O)C(=O)c3ccccc23)cc1</chem>                         | 510    | nM |
| CHEMBL1214587 | <chem>COc1cccc2e1c(cnc2Cc3ccccc3Cl)C(=O)\C=C(/O)\C(=O)O</chem>                              | 520    | nM |
| CHEMBL225681  | <chem>OC(=O)C(=O)CC(=O)c1ccc2ccc3ccccc4ccc1c2c34</chem>                                     | 530    | nM |
| CHEMBL3087336 | <chem>COc1cccc1Cn2cccc2\C=C\C(=O)CC(=O)C(=O)O</chem>                                        | 530    | nM |
| CHEMBL3087790 | <chem>CCOC(=O)C(=O)CC(=O)\C=C\c1cccn1Cc2cccc(F)c2F</chem>                                   | 530    | nM |
| CHEMBL3125976 | <chem>ON1C(=O)C(=Cc2ccccc(O)c12)C(=O)NCc3ccc(F)c(Cl)c3</chem>                               | 530    | nM |
| CHEMBL1289199 | <chem>CN(O)C(=O)c1cc2c(CN3CCN(C)CC3)en(Cc4ccc(F)cc4)c2en1</chem>                            | 534    | nM |
| CHEMBL2171669 | <chem>CN(C)C(=O)C1=C(O)C(=O)C(=CN1)C(=O)NCc2ccc(F)cc2</chem>                                | 540    | nM |
| CHEMBL3582058 | <chem>OC(=O)\C(=C\C(=O)C1=CN(Cc2ccc(Cl)cc2)c3ccccc3C1=O)\O</chem>                           | 540    | nM |
| CHEMBL458064  | <chem>CCOC(=O)\C(=C\C(=O)C1=CN(Cc2ccc(F)cc2)c3ccccc3C1=O)\O</chem>                          | 542.95 | nM |
| CHEMBL232436  | <chem>COc1ccc(CNC(=O)c2nc(nc(O)c2O)c3ccccc3)cc1</chem>                                      | 549.54 | nM |
| CHEMBL562482  | <chem>CN1CCCC1(C)C2=NC(=C(O)C(=O)N2C)C(=O)NCc3ccc(F)cc3</chem>                              | 550    | nM |
| CHEMBL573873  | <chem>OC(=O)\C(=C\C(=O)c1cccn(Cc2ccccc2)c1)\O</chem>                                        | 550    | nM |
| CHEMBL1289981 | <chem>COCCOCCc1cn(Cc2ccc(F)cc2)c3enc(cc13)C(=O)N(C)O</chem>                                 | 552    | nM |
| CHEMBL1289863 | <chem>CN(O)C(=O)c1cc2c(CCCN3CCOCC3)en(Cc4ccc(F)cc4)c2en1</chem>                             | 559    | nM |
| CHEMBL2407284 | <chem>ON1C(=O)C(C(=O)NCc2ccc(O)cc2O)c3ccccc3C1=O</chem>                                     | 572    | nM |
| CHEMBL1213724 | <chem>COc1cccc2e1c(cnc2Cc3ccc(Cl)cc3)C(=O)\C=C(/O)\C(=O)O</chem>                            | 590    | nM |

|               |                                                                                                                               |        |    |
|---------------|-------------------------------------------------------------------------------------------------------------------------------|--------|----|
| CHEMBL3415848 | OC(=O)\C(=C\C(=O)\C=C\c1cc(cn1c2ccccc2)C(=O)c3ccc(F)cc3)\O<br>Oc1c(\C=N\Nc2nc(Nc3ccccc3)nc(Nc4ccccc4)n2)cc(Br)cc1[N+](=O)[O-] | 590    | nM |
| CHEMBL240506  | Oc1ccc2CN(N3C(=O)c4ccc(O)c(O)c4C3=O)C(=O)c2c1O                                                                                | 600    | nM |
| CHEMBL253394  | COc1cccc2c1c(cn2Cc3ccc(F)c(F)c3)C(=O)\C=C(/O)\C(=O)O                                                                          | 600    | nM |
| CHEMBL495960  | OCCCCN1C=C(C(=O)O)C(=O)c2ccc(Cc3ccc(Cl)cc3Cl)ccc12                                                                            | 600    | nM |
| CHEMBL522229  | COc1c2CN(Cc3ccc(F)cc3)C(=O)c2c(O)c4ncc(Cc5ccc(F)cc5)cc14                                                                      | 600    | nM |
| CHEMBL459381  | Oc1ccc2C(=O)N(Cc3cc(F)c(F)c(F)c3)C(=O)c2c1O                                                                                   | 600    | nM |
| CHEMBL572334  | CCOC(=O)C(=O)CC(=O)\C=C\c1cccn1Cc2ccc(F)c(F)c2                                                                                | 600    | nM |
| CHEMBL3087623 | OC1=C(N=C(NC1=O)c2ccc(F)cc2)C(=O)NCc3ccc(F)cc3                                                                                | 600    | nM |
| CHEMBL3334633 | CCOC(=O)\C(=C\C(=O)\C=C\c1cccn1Cc2ccc(F)c(F)c2)\O                                                                             | 600    | nM |
| CHEMBL3415856 | COc1ccc(cc1)C2=Cc3ccc(cc3C(CC(=O)C)N2c4ccc(C)cc4)[N+](=O)[O-]                                                                 | 600    | nM |
| CHEMBL3740792 | Oc1c(ncc2cccn12)c3nnc(Cc4ccc(Cl)cc4)[nH]3                                                                                     | 640    | nM |
| CHEMBL523303  | OC(=O)\C(=C\C(=O)C1=CN(Cc2ccc(cc2)[N+](=O)[O-])c3ccccc3C1=O)\O                                                                | 640    | nM |
| CHEMBL3582061 | CCOC(=O)C1=C(CC)N(Cc2ccc(cc2)C(=O)\C=C(/O)\C(=O)O)C(=O)N=C1c3ccccc3                                                           | 640    | nM |
| CHEMBL3736051 | CCOC(=O)\C(=C\C(=O)c1cn(Cc2ccc(F)cc2)c3c(OC)ccc(OC)c13)\O                                                                     | 660    | nM |
| CHEMBL260398  | CCOC(=O)\C(=C\C(=O)c1cn(Cc2ccc(F)cc2F)c3ccccc(OC)c13)\O                                                                       | 670    | nM |
| CHEMBL496580  | CC1CCC(N1C)C2=NC(=C(O)C(=O)N2C)C(=O)NCc3ccc(F)cc3                                                                             | 690    | nM |
| CHEMBL241924  | COc1cc(\C=C\c2ccc3ccc(C(=O)O)c(O)c3n2)cc(O)c1O                                                                                | 700    | nM |
| CHEMBL36640   | Oc1ccc2CN(Cc3cccc(F)c3F)C(=O)c2c1O                                                                                            | 700    | nM |
| CHEMBL539708  | Oc1cc(cc(O)c1O)C(=O)Nc2ccc(cc2)S(=O)(=O)Nc3ccc(Br)cc3                                                                         | 700    | nM |
| CHEMBL549298  | Oc1cc(cc(O)c1O)C(=O)Nc2ccc(cc2)S(=O)(=O)Nc3cccc(Br)c3                                                                         | 700    | nM |
| CHEMBL549299  | [Na+].COc1cc(\C=C\c2ccc3ccc(C(=O)[O-])c(O)c3n2)cc(O)c1O                                                                       | 700    | nM |
| CHEMBL1631331 | CS(=O)(=O)NCCCN(c1nc(C(=O)NCc2ccc(F)cc2)c(O)c3ncccc13)S(=O)(=O)C                                                              | 700    | nM |
| CHEMBL2180585 | CS(=O)(=O)NCCCCCN(c1nc(C(=O)NCc2ccc(F)cc2)c(O)c3ncccc13)S(=O)(=O)C                                                            | 700    | nM |
| CHEMBL2180586 | COC1=C(N=C(Cc2ccc(O)cc2)N(C)C1=O)C(=O)N3CCN(CCNC(=O)c4cc(O)c(O)c(O)c4)CC3                                                     | 700    | nM |
| CHEMBL3397851 | CCOC(=O)\C(=C\C(=O)C1=CN(Cc2ccccc2)c3ccccc3C1=O)\O                                                                            | 700    | nM |
| CHEMBL3582038 | COc1ccc(cc1)C2=Cc3ccc(F)cc3C(C[N+](=O)[O-])N2c4ccc(Cl)cc4                                                                     | 700    | nM |
| CHEMBL3739466 | Oc1nc(nc(C(=O)NCC2CCCC2)c1O)c3ccccc3                                                                                          | 707.11 | nM |
| CHEMBL373761  | OC1=C(N=C(NC1=O)c2ccc(F)cc2)C(=O)NCc3ccc(Br)cc3                                                                               | 707.11 | nM |
| CHEMBL3334635 | CC1CCN(C)C1C2=NC(=C(O)C(=O)N2C)C(=O)NCc3ccc(F)cc3                                                                             | 710    | nM |
| CHEMBL244051  | CCOC(=O)\C(=C\C(=O)c1cn(Cc2ccccc2F)c3ccccc(OC)c13)\O                                                                          | 720    | nM |
| CHEMBL496565  | Oc1ccc2C(=O)N(Cc3cccc4ccccc34)C(=O)c2c1O                                                                                      | 720    | nM |
| CHEMBL578595  | OC(=O)\C=C\c1ccc(O)c(O)c1\C(=C\c2ccc(O)c(O)c2)\C(=O)O                                                                         | 730    | nM |
| CHEMBL524273  | CCOC(=O)\C(=C\C(=O)c1cn(Cc2ccccc2Cl)c3ccccc(OC)c13)\O                                                                         | 730    | nM |
| CHEMBL1214417 | ON1C(=O)C(C(=O)Nc2ccccc2)c3ccccc3C1=O                                                                                         | 730    | nM |
| CHEMBL2407276 | OC(=O)\C(=C\C(=O)\C=C\c1cn(Cc2ccc(F)cc2)cc1c3ccccc3)\O                                                                        | 730    | nM |
| CHEMBL3415852 | Oc1ccc2CN(Cc3cccc4ccccc34)C(=O)c2c1O                                                                                          | 740    | nM |
| CHEMBL443502  | CCOC(=O)\C(=C\C(=O)c1cn(Cc2ccc(Cl)c2F)c3ccccc(OC)c13)\O                                                                       | 740    | nM |
| CHEMBL1214535 | OC(=O)\C(=C\C(=O)c1cccc(Cc2ccc(Cl)cc2)c1)\O                                                                                   | 750    | nM |
| CHEMBL572472  | OC(=O)C(=O)CC(=O)\C=C\c1cccn1Cc2ccc(c2)C#N                                                                                    | 750    | nM |
| CHEMBL3087334 | CN(C)C(=O)Oc1c2CN(Cc3ccc(F)cc3)C(=O)c2c(O)c4ncccc14                                                                           | 760    | nM |
| CHEMBL210396  | OC1=C(N=C2C=CC(=CN2C1=O)N3CCOCC3)C(=O)NCc4ccc(F)cc4                                                                           | 775    | nM |
| CHEMBL1257580 | Cc1c(nnn1Cc2ccccc(F)c2)C(=O)\C=C(/O)\c3cc(O)c(O)c(O)c3                                                                        | 780    | nM |
| CHEMBL1928170 | ON1C(=O)C(=Cc2ccccc(O)c12)C(=O)NCc3ccc(F)c(F)c3                                                                               | 780    | nM |
| CHEMBL3125977 | CCOC(=O)\C(=C\C(=O)c1cc(cn1Cc2ccc(F)cc2)c3ccccc3)\O                                                                           | 790    | nM |

|               |                                                                                            |        |    |
|---------------|--------------------------------------------------------------------------------------------|--------|----|
| CHEMBL550574  | <chem>Cc1cc(CN2C(=O)c3ccc(O)c(O)c3C2=O)ccc1F</chem>                                        | 800    | nM |
| CHEMBL553173  | <chem>Oc1ccc2C(=O)N(Cc3ccc(F)c(F)c3F)C(=O)c2c1O</chem>                                     | 800    | nM |
| CHEMBL568970  | <chem>Oc1ccc2CN(Cc3ccc4ccccc4c3)C(=O)c2c1O</chem>                                          | 800    | nM |
| CHEMBL402709  | <chem>Oc1ccc2CN(N3C(=O)c4cc(O)c(O)cc4C3=O)C(=O)c2c1O</chem>                                | 810    | nM |
| CHEMBL498204  | <chem>CCOC(=O)\C(=C\C(=O)c1cn(Cc2c(F)ccc(F)c2F)c3cccc(OC)c13)\O</chem>                     | 820    | nM |
|               | <chem>COc1ccc(cc1)C2=Cc3ccc(F)cc3C(CC(=O)CO)N2c4ccc(cc4)[N+](=O)[O-]</chem>                | 820    | nM |
| CHEMBL3739970 | <chem>OC(=O)\C(=C\C(=O)C1=CN(Cc2ccc(F)cc2)c3ccc(F)cc3C1=O)\O</chem>                        | 830.66 | nM |
| CHEMBL456580  | <chem>OC(=O)C(=O)CC(=O)\C=C\c1cccn1Cc2ccccc2</chem>                                        | 843.21 | nM |
| CHEMBL49201   | <chem>CCOC(=O)C1=C(CC)N(Cc2ccc(Cc3cccc(c3)C(=O)\C=C(/O)\C(=O)O)c2)C(=O)N=C1c4ccccc4</chem> | 850    | nM |
| CHEMBL3735829 | <chem>Oc1c(O)c2C(=O)N(Cc3ccc(F)c(Cl)c3)Cc2cc1c4ccccc4</chem>                               | 870    | nM |
| CHEMBL2206232 | <chem>CCOC(=O)\C(=C\C(=O)c1cn(Cc2cc(Cl)ccc2F)c3cccc(OC)c13)\O</chem>                       | 890    | nM |
| CHEMBL1214584 | <chem>CN1C(=O)C(=C(O)c2cc(Cc3ccc(F)cc3)ccc12)C(=O)O</chem>                                 | 900    | nM |
| CHEMBL464215  | <chem>ON1C(=O)Cc2ccc(Br)cc2C1=O</chem>                                                     | 900    | nM |
| CHEMBL444646  | <chem>Oc1ccc2CN(Cc3ccc(F)c(F)c3)C(=O)c2c1O</chem>                                          | 900    | nM |
| CHEMBL563507  | <chem>Cc1cc(CN2Cc3ccc(O)c(O)c3C2=O)ccc1F</chem>                                            | 900    | nM |
| CHEMBL561770  | <chem>Oc1ccc2C(=O)N(Cc3ccc(Cl)c(F)c3)C(=O)c2c1O</chem>                                     | 900    | nM |
| CHEMBL569376  | <chem>Oc1cc(cc(O)c1O)C(=O)Nc2ccc(cc2)S(=O)(=O)Nc3ccc(F)cc3</chem>                          | 900    | nM |
| CHEMBL556071  | <chem>Oc1ccc2C(=O)N(Cc3ccc(F)c(Br)c3)C(=O)c2c1O</chem>                                     | 900    | nM |
| CHEMBL563783  | <chem>Oc1ccc(\C=C\S(=O)(=O)CS(=O)(=O)\C=C\c2ccc(O)c(O)c2O)c(O)c1O</chem>                   | 900    | nM |
| CHEMBL2297144 | <chem>COC1=C(N=C(Cc2ccccc2)N(C)C1=O)C(=O)N3CCN(CCCNC(=O)c4cc(O)c(O)c(O)c4)CC3</chem>       | 900    | nM |
| CHEMBL3397844 | <chem>OC(=O)C(=O)CC(=O)\C=C\c1cccn1Cc2ccccc(F)c2</chem>                                    | 920    | nM |
| CHEMBL3087631 | <chem>CCOC(=O)c1c(CC)nc(SCc2ccc(cc2)C(=O)\C=C(/O)\C(=O)O)nc1c3ccc(F)cc3</chem>             | 920    | nM |
| CHEMBL3735630 | <chem>Oc1c(nc2ccnc12)c3noc(Cc4ccccc4)n3</chem>                                             | 950    | nM |
| CHEMBL510677  | <chem>OC(=O)c1cc2ccn(Cc3cccc(Cl)c3F)c2cn1</chem>                                           | 950    | nM |
| CHEMBL574570  | <chem>Oc1ccc2C(=O)N(Cc3ccc4ccccc4c3)C(=O)c2c1O</chem>                                      | 960    | nM |
| CHEMBL579040  | <chem>OC(=O)C(=O)CC(=O)\C=C\c1cccn1Cc2cc(Cl)cc(Cl)c2</chem>                                | 970    | nM |
| CHEMBL3087331 | <chem>OC(=O)C(=O)CC(=O)\C=C\c1cccn1Cc2ccccc2F</chem>                                       | 980    | nM |
| CHEMBL3087630 | <chem>Oc1nc(nc(C(=O)Nc2ccccc2)c1O)c3cccs3</chem>                                           | 1000   | nM |
| CHEMBL373760  | <chem>OC1=C(C(=O)NNC(=O)c2ccccc2)[N+](=O)[O-]C(=O)Nc3ccccc13</chem>                        | 1000   | nM |
| CHEMBL241597  | <chem>Oc1ccc2C(=O)N(Cc3ccccc(I)c3)C(=O)c2c1O</chem>                                        | 1000   | nM |
| CHEMBL572338  | <chem>Oc1ccc2CN(Cc3ccc(F)c(Br)c3)C(=O)c2c1O</chem>                                         | 1000   | nM |
| CHEMBL557898  | <chem>Oc1c(nc(NCCc2c[nH]c3ccccc23)c4ccnc14)C(=O)Nc5ccc(F)cc5</chem>                        | 1000   | nM |
| CHEMBL2180588 | <chem>CCOC(=O)C(=O)CC(=O)\C=C\c1cccn1Cc2ccc(F)cc2F</chem>                                  | 1000   | nM |
| CHEMBL3085796 | <chem>CCOC(=O)C(=O)CC(=O)\C=C\c1cccn1Cc2ccccc2F</chem>                                     | 1000   | nM |
| CHEMBL3087632 | <chem>OC1=C(N=C(NC1=O)c2ccc(F)cc2)C(=O)Nc3ccc(F)c(F)c3</chem>                              | 1000   | nM |
| CHEMBL3334636 | <chem>OC1=C(N=C(NC1=O)c2ccccc2)C(=O)Nc3ccc(F)cc3</chem>                                    | 1000   | nM |
| CHEMBL3334647 | <chem>OC1=C(N=C(NC1=O)c2ccccc2)C(=O)Nc3ccc(F)cc3</chem>                                    | 1000   | nM |
| CHEMBL3334652 | <chem>Oc1c(nc2ccnc12)c3nnc(Cc4cccc(Cl)c4)[nH]3</chem>                                      | 1030   | nM |
| CHEMBL490971  | <chem>COc1ccc(CNC(=O)C2C(=O)N(O)C(=O)c3ccccc23)cc1</chem>                                  | 1030   | nM |
| CHEMBL2407282 | <chem>OC1=CC(=O)N2CCCN(Cc3ccc(F)cc3)C(=O)C2=C1O</chem>                                     | 1040   | nM |
| CHEMBL236241  | <chem>CCOC(=O)\C(=C\C(=O)C1=CN(Cc2cccc(Cl)c2F)c3ccccc3C1=O)\O</chem>                       | 1080   | nM |
| CHEMBL3582052 | <chem>OC(=O)Cc1c(O)c(O)ccc1\C=C\C(=O)O</chem>                                              | 1090   | nM |
| CHEMBL507259  | <chem>CCOC(=O)C1=C(CC)N(Cc2ccc(cc2)C(=O)\C=C(/O)\C(=O)O)C(=O)N=C1c3ccc(F)cc3</chem>        | 1100   | nM |
| CHEMBL3735944 | <chem>ON1C(=O)C(C(=O)Nc2ccc(F)cc2)c3ccccc3C1=O</chem>                                      | 1120   | nM |
| CHEMBL2407279 | <chem>CCOC(=O)\C(=C\C(=O)c1cn(Cc2ccc(F)c(F)c2F)c3cccc(OC)c13)\O</chem>                     | 1150   | nM |
| CHEMBL496346  | <chem>OC(=O)c1cc2ccn(Cc3c(F)cc(Cl)cc3F)c2cn1</chem>                                        | 1190   | nM |

|               |                                                                                                                                                                                   |         |    |
|---------------|-----------------------------------------------------------------------------------------------------------------------------------------------------------------------------------|---------|----|
| CHEMBL49363   | <chem>Cc1ccc(Cn2cccc2\C=C\C(=O)CC(=O)C(=O)O)cc1</chem>                                                                                                                            | 1200    | nM |
| CHEMBL377693  | <chem>CCOc1ccc(cc1)c2c3CN(Cc4ccc(F)cc4)C(=O)c3c(O)c5ncccc25</chem>                                                                                                                | 1200    | nM |
| CHEMBL252570  | <chem>Oc1ccc2CN(N3Cc4ccc(O)c(O)c4S3(=O)=O)C(=O)c2c1O</chem>                                                                                                                       | 1200    | nM |
| CHEMBL550838  | <chem>Oc1ccc2CN(Cc3cc(Cl)ccc3F)C(=O)c2c1O</chem>                                                                                                                                  | 1200    | nM |
| CHEMBL1214534 | <chem>CCOC(=O)\C(=C\C(=O)c1cn(Cc2c(F)cccc2Cl)c3cccc(OC)c13)\O</chem>                                                                                                              | 1200    | nM |
| CHEMBL3087328 | <chem>OC(=O)C(=O)CC(=O)\C=C\c1cccn1Cc2cc(F)cc(F)c2</chem>                                                                                                                         | 1200    | nM |
| CHEMBL3415836 | <chem>CCOC(=O)\C(=C\C(=O)\C=C\c1cc(en1c2cccc2)C(=O)c3ccc(F)cc3)\O</chem><br><chem>CCOC(=O)c1c(nc(SCc2ccc(cc2)C(=O)\C=C(/O)\C(=O)O)nc1c3ccc(OC</chem><br><chem>)cc3)c4cccc4</chem> | 1200    | nM |
| CHEMBL3735286 | <chem>CCOC(=O)\C(=C\C(=O)C1=CN(Cc2ccc(F)cc2)c3cc(F)ccc3C1=O)\O</chem>                                                                                                             | 1249    | nM |
| CHEMBL3334634 | <chem>OC1=C(N=C(NC1=O)c2ccc(F)cc2)C(=O)NCc3ccc(Cl)cc3</chem>                                                                                                                      | 1264.91 | nM |
| CHEMBL458280  | <chem>OCCCN1C=C(C(=O)O)C(=O)c2cc(Cc3ccc(Cl)cc3Cl)ccc12</chem>                                                                                                                     | 1300    | nM |
| CHEMBL564499  | <chem>Oc1ccc2C(=O)N(Cc3ccc(F)cc3Cl)C(=O)c2c1O</chem>                                                                                                                              | 1300    | nM |
| CHEMBL560769  | <chem>Oc1ccc2C(=O)N(Cc3c(F)c(F)c(F)c(F)c3F)C(=O)c2c1O</chem>                                                                                                                      | 1300    | nM |
| CHEMBL557046  | <chem>CCOc1ccc(NS(=O)(=O)c2ccc(NC(=O)c3cc(O)c(O)c(O)c3)cc2)cc1</chem>                                                                                                             | 1300    | nM |
| CHEMBL2171668 | <chem>CNC(=O)C1=C(O)C(=O)C(=CN1)C(=O)NCc2ccc(F)cc2</chem>                                                                                                                         | 1300    | nM |
| CHEMBL3087629 | <chem>Cc1cccc(Cn2cccc2\C=C\C(=O)CC(=O)C(=O)O)c1</chem>                                                                                                                            | 1300    | nM |
| CHEMBL3582051 | <chem>CCOC(=O)\C(=C\C(=O)C1=CN(Cc2cc(C)cc(C)c2)c3cccc3C1=O)\O</chem><br><chem>CCOC(=O)C1=C(C)N(Cc2ccc(cc2)C(=O)\C=C(/O)\C(=O)O)C(=O)N=</chem><br><chem>C1c3ccc(F)cc3</chem>       | 1300    | nM |
| CHEMBL3735397 | <chem>CCOC(=O)C1=C(N(Cc2ccc(cc2)C(=O)\C=C(/O)\C(=O)O)C(=O)N=C1</chem><br><chem>c3cc(C)cc(C)c3)c4cccc4</chem>                                                                      | 1300    | nM |
| CHEMBL3736042 | <chem>CCOC(=O)\C(=C\C(=O)C1=CN(Cc2cccc2OC)c3cccc3C1=O)\O</chem>                                                                                                                   | 1400    | nM |
| CHEMBL2236589 | <chem>OC1=C(N=C(NC1=O)c2ccc(F)cc2)C(=O)NCc3ccc(Cl)c3</chem>                                                                                                                       | 1400    | nM |
| CHEMBL3334640 | <chem>OC1=C(N=C(NC1=O)c2ccc(F)cc2)C(=O)NCc3ccc(Cl)c3F</chem>                                                                                                                      | 1400    | nM |
| CHEMBL3334644 | <chem>OC1=C(N=C(NC1=O)c2ccc(F)cc2)C(=O)NCc3ccc(Cl)c3F</chem>                                                                                                                      | 1400    | nM |
| CHEMBL3582041 | <chem>CCOC(=O)\C(=C\C(=O)C1=CN(Cc2ccc(O)cc2)c3cccc3C1=O)\O</chem>                                                                                                                 | 1400    | nM |
| CHEMBL497394  | <chem>CCOC(=O)\C(=C\C(=O)c1cn(Cc2cc(F)c(F)c(F)c2)c3cccc(OC)c13)\O</chem>                                                                                                          | 1410    | nM |
| CHEMBL1289080 | <chem>CN(O)C(=O)c1cc2c(CN3CCC(O)C3)cn(Cc4ccc(F)cc4)c2cn1</chem>                                                                                                                   | 1421    | nM |
| CHEMBL562196  | <chem>Oc1cc(cc(O)c1O)C(=O)Nc2ccc(cc2)S(=O)(=O)Nc3ccc(F)c(F)c3</chem>                                                                                                              | 1500    | nM |
| CHEMBL549713  | <chem>Oc1cc(cc(O)c1O)C(=O)Nc2ccc(cc2)S(=O)(=O)Nc3cccc3</chem>                                                                                                                     | 1500    | nM |
| CHEMBL2206233 | <chem>Oc1cc2CN(Cc3ccc(F)c(Cl)c3)C(=O)c2c(O)c1O</chem>                                                                                                                             | 1500    | nM |
| CHEMBL496142  | <chem>CCOC(=O)\C(=C\C(=O)c1cn(Cc2ccc(F)c(F)c2)c3cccc(OC)c13)\O</chem>                                                                                                             | 1560    | nM |
| CHEMBL497661  | <chem>CCN1C=C(C(=O)O)C(=O)C2=C1C(=O)C=C(Sc3cccc3)C2=O</chem><br><chem>CC(=O)Oc1cc(cc(OC(=O)C)c1OC(=O)C)C(=O)Nc2ccc(cc2)S(=O)(=O)</chem><br><chem>Ne3cccc3</chem>                  | 1600    | nM |
| CHEMBL560002  | <chem>CC(=O)Oc1cc(cc(OC(=O)C)c1OC(=O)C)C(=O)Nc2ccc(cc2)S(=O)(=O)</chem><br><chem>Ne3cccc3C</chem>                                                                                 | 1600    | nM |
| CHEMBL549995  | <chem>Ne3cccc3C</chem>                                                                                                                                                            | 1600    | nM |
| CHEMBL3087338 | <chem>Cc1cc(C)cc(Cn2cccc2\C=C\C(=O)CC(=O)C(=O)O)c1</chem>                                                                                                                         | 1600    | nM |
| CHEMBL3087620 | <chem>OC(=O)C(=O)CC(=O)\C=C\c1cccn1Cc2ccc(F)c(F)c2</chem>                                                                                                                         | 1600    | nM |
| CHEMBL3415833 | <chem>CCOC(=O)\C(=C\C(=O)c1ccn(Cc2ccc(F)cc2)c1)\O</chem>                                                                                                                          | 1600    | nM |
| CHEMBL19977   | <chem>OC(=O)C(=O)CC(=O)c1cc(OCc2cccc2)cc(OCc3cccc3)c1</chem>                                                                                                                      | 1641.65 | nM |
| CHEMBL226490  | <chem>OC(=O)C(=O)CC(=O)c1c2cccc2cc3cccc13</chem>                                                                                                                                  | 1700    | nM |
| CHEMBL562335  | <chem>Oc1cc(cc(O)c1O)C(=O)Nc2ccc(cc2)S(=O)(=O)Nc3ccc(Cl)c(Cl)c3</chem>                                                                                                            | 1700    | nM |
| CHEMBL3087335 | <chem>OC(=O)C(=O)CC(=O)\C=C\c1cccn1Cc2ccc(cc2)C#N</chem>                                                                                                                          | 1700    | nM |
| CHEMBL3087626 | <chem>CCOC(=O)C(=O)CC(=O)\C=C\c1cccn1Cc2c(Cl)cccc2Cl</chem>                                                                                                                       | 1700    | nM |
| CHEMBL36303   | <chem>Oc1cccc1C(=O)NNC(=O)c2cccc2O</chem>                                                                                                                                         | 1800    | nM |
| CHEMBL252700  | <chem>COc1cccc(CN(Cc2cccc(OC)c2)c3ccc4nc(N)[nH]c4c3)c1</chem>                                                                                                                     | 1800    | nM |
| CHEMBL549415  | <chem>Oc1ccc2C(=O)N(Cc3c(F)ccc(F)c3F)C(=O)c2c1O</chem>                                                                                                                            | 1800    | nM |
| CHEMBL556473  | <chem>Oc1ccc2C(=O)N(Cc3cccc(Cl)c3F)C(=O)c2c1O</chem>                                                                                                                              | 1843.91 | nM |
| CHEMBL557770  | <chem>OC(=O)C(=O)CC(=O)c1ccc(NC(=O)c2cccc2)s1</chem>                                                                                                                              | 1900    | nM |
| CHEMBL3736096 | <chem>CCOC(=O)C1=C(N(Cc2ccc(cc2)C(=O)\C=C(/O)\C(=O)O)C(=O)N=C1</chem><br><chem>c3ccc(OC)cc3)c4cccc4</chem>                                                                        | 1900    | nM |

|               |                                                                                                                  |         |    |
|---------------|------------------------------------------------------------------------------------------------------------------|---------|----|
| CHEMBL388276  | <chem>COc1cccc(\C=C\C(=O)c2ccccc2)c1O</chem>                                                                     | 2000    | nM |
| CHEMBL562273  | <chem>Oc1cc(cc(O)c1O)C(=O)Nc2ccc(cc2)S(=O)(=O)NCc3ccc(Cl)cc3</chem>                                              | 2000    | nM |
| CHEMBL559681  | <chem>Cc1ccccc1NS(=O)(=O)c2ccc(NC(=O)c3cc(O)c(O)c(O)c3)cc2</chem>                                                | 2000    | nM |
| CHEMBL561709  | <chem>Oc1ccc2C(=O)N(Cc3ccccc3F)C(=O)c2c1O</chem>                                                                 | 2000    | nM |
| CHEMBL561593  | <chem>Oc1cc(cc(O)c1O)C(=O)Nc2ccc(cc2)S(=O)(=O)NCc3ccc(F)cc3</chem>                                               | 2000    | nM |
| CHEMBL564228  | <chem>Oc1cc(cc(O)c1O)C(=O)Nc2ccc(cc2)S(=O)(=O)Nc3ccc(Cl)cc3</chem>                                               | 2000    | nM |
| CHEMBL549886  | <chem>Oc1ccc2CN(Cc3ccccc(Cl)c3F)C(=O)c2c1O</chem>                                                                | 2000    | nM |
| CHEMBL551560  | <chem>Oc1ccc2C(=O)N(Cc3c(F)ccccc3F)C(=O)c2c1O</chem>                                                             | 2000    | nM |
| CHEMBL557865  | <chem>NS(=O)(=O)c1ccc(NC(=O)c2cc(O)c(O)c(O)c2)cc1</chem>                                                         | 2000    | nM |
| CHEMBL1223974 | <chem>CC1(C)Oc2ccc3C(=O)C(=C(O)C(=O)c3c2C=C1)C4=C(C(=O)c5ccccc5C4=O)C6=C(O)C(=O)c7c8C=CC(C)(C)Oc8ccc7C6=O</chem> | 2000    | nM |
| CHEMBL1813126 | <chem>CCOC(=O)CC(=O)Nc1ccc(cc1)C(=O)O</chem>                                                                     | 2000    | nM |
| CHEMBL3334638 | <chem>COc1ccc(CNC(=O)C2=C(O)C(=O)NC(=N2)c3ccc(F)cc3)cc1</chem>                                                   | 2000    | nM |
| CHEMBL3334650 | <chem>OC1=C(N=C(NC1=O)c2ccccc2F)C(=O)NCc3ccc(F)cc3</chem>                                                        | 2000    | nM |
| CHEMBL3735322 | <chem>CCOC(=O)C1=C(N(Cc2ccc(cc2)C(=O)\C=C(/O)\C(=O)O)C(=O)N=C1c3ccccc3)c4ccccc4</chem>                           | 2000    | nM |
| CHEMBL211275  | <chem>CCOC(=O)c1cccc(c1)c2c3CN(Cc4ccc(F)cc4)C(=O)c3c(O)c5ncccc25</chem>                                          | 2100    | nM |
| CHEMBL252905  | <chem>NC(=N)c1ccc2cc(ccc2c1)C#Cc3ccccc(OCc4ccccc4)c3</chem>                                                      | 2100    | nM |
| CHEMBL497490  | <chem>CCN1C=C(C(=O)O)C(=O)C2=C1C(=O)C=C(Nc3ccc(F)c(Cl)c3)C2=O</chem>                                             | 2100    | nM |
| CHEMBL473489  | <chem>O\C(=C/C(=O)c1c[nH]c2ccc(Cl)cc12)\c3nnn[nH]3</chem>                                                        | 2100    | nM |
| CHEMBL555736  | <chem>COc1c2CCc3cc(\C=N\Nc4ccc(cc4)[N+](=O)[O-])c(C(=O)O)c(O)c3c2c(O)c5C(=O)c6cc(O)c(C)c(O)c6C(=O)c15</chem>     | 2200    | nM |
| CHEMBL3582044 | <chem>CCOC(=O)\C(=C\C(=O)C1=CN(Cc2ccc(F)cc2F)c3ccccc3C1=O)\O</chem>                                              | 2200    | nM |
| CHEMBL3735665 | <chem>CCOC(=O)c1c(CC)nc(SCc2ccc(cc2)C(=O)\C=C(/O)\C(=O)O)nc1c3ccc</chem>                                         | 2230    | nM |
| CHEMBL495970  | <chem>CCOC(=O)\C(=C\C(=O)c1cn(Cc2ccc(F)c2)c3ccccc(OC)c13)\O</chem>                                               | 2260    | nM |
| CHEMBL3735583 | <chem>CCOC(=O)c1c(CC)nc(SCc2ccc(cc2)C(=O)\C=C(/O)\C(=O)O)nc1c3ccc</chem>                                         | 2270    | nM |
| CHEMBL2206772 | <chem>(OC)cc3</chem>                                                                                             | 2300    | nM |
| CHEMBL2206772 | <chem>CCCCc1c(O)c(O)c2C(=O)N(Cc3ccc(F)c(Cl)c3)Cc2c1S(=O)(=O)N(C)C</chem>                                         | 2300    | nM |
| CHEMBL3582066 | <chem>OC(=O)\C(=C\C(=O)C1=CN(Cc2ccc(Cl)cc2Cl)c3ccccc3C1=O)\O</chem>                                              | 2300    | nM |
| CHEMBL3735455 | <chem>CCOC(=O)C1=C(C(C)C)N(Cc2ccc(cc2)C(=O)\C=C(/O)\C(=O)O)C(=O)</chem>                                          | 2300    | nM |
| CHEMBL259012  | <chem>)N=C1c3ccccc3</chem>                                                                                       | 2300    | nM |
| CHEMBL259012  | <chem>OC(=O)\C(=C\C(=O)c1cn(Cc2ccc(F)cc2)c3ccccc13)\O</chem>                                                     | 2330    | nM |
| CHEMBL1673089 | <chem>OC(=O)\C(=C\C(=O)c1cn(Cc2ccccc2)c3ccccc13)\O</chem>                                                        | 2330    | nM |
| CHEMBL260619  | <chem>CCOC(=O)\C(=C\C(=O)c1cn(Cc2ccc(F)cc2)c3cc(OC)ccc13)\O</chem>                                               | 2340    | nM |
| CHEMBL212320  | <chem>CN(C)C(=O)Oc1c2C(=O)N(Cc3ccc(F)cc3)C(=O)c2c(O)c4ncccc14</chem>                                             | 2400    | nM |
| CHEMBL491149  | <chem>Oc1c(ncc2cccn2)c3nnc(Cc4ccccc4)[nH]3</chem>                                                                | 2400    | nM |
| CHEMBL574316  | <chem>OC(=O)\C(=C\C(=O)C(=O)c1cccc(c1)C(=O)c2ccccc2)\O</chem>                                                    | 2400    | nM |
| CHEMBL1270317 | <chem>ON1C(=O)C=C(c2ccccc2)c3ccccc3)c4ccnnc14</chem>                                                             | 2400    | nM |
| CHEMBL3238122 | <chem>CCOC(=O)\C(=C\C(=O)C1=CN(Cc2ccc(F)cc2)c3cc(ccc3C1=O)N4CC</chem>                                            | 2400    | nM |
| CHEMBL3397845 | <chem>N(CC)CC4)\O</chem>                                                                                         | 2400    | nM |
| CHEMBL3397845 | <chem>COC1=C(N=C(Cc2ccc(Cl)cc2)N(C)C1=O)C(=O)N3CCN(CCCNC(=O)</chem>                                              | 2400    | nM |
| CHEMBL3734837 | <chem>c4cc(O)c(O)c(O)c4)CC3</chem>                                                                               | 2400    | nM |
| CHEMBL3734837 | <chem>CCOC(=O)C1=C(C)N(Cc2ccc(cc2)C(=O)\C=C(/O)\C(=O)O)C(=O)N=C1c3ccccc3</chem>                                  | 2400    | nM |
| CHEMBL3734908 | <chem>CCOC(=O)C1=C(N(Cc2ccc(cc2)C(=O)\C=C(/O)\C(=O)O)C(=O)N=C1c3ccc(F)cc3)c4ccccc4</chem>                        | 2400    | nM |
| CHEMBL3116306 | <chem>c3ccc(F)cc3)c4ccccc4</chem>                                                                                | 2449.49 | nM |
| CHEMBL3116306 | <chem>NC(Cc1ccc(Cl)c(Cl)c1)(P(=O)(O)O)P(=O)(O)O</chem>                                                           | 2491.99 | nM |
| CHEMBL456365  | <chem>CCOC(=O)\C(=C\C(=O)C1=CN(Cc2ccc(F)cc2)c3cc(ccc3C1=O)N4CC</chem>                                            | 2491.99 | nM |
| CHEMBL456365  | <chem>CC4)\O</chem>                                                                                              | 2500    | nM |
| CHEMBL388420  | <chem>Oc1nc(nc(C(=O)Nc2cnsc2)c1O)c3cccs3</chem>                                                                  | 2500    | nM |
| CHEMBL561646  | <chem>Oc1ccc2CN(Cc3ccc(F)cc3Cl)C(=O)c2c1O</chem>                                                                 | 2500    | nM |
| CHEMBL556642  | <chem>CCCCc1ccc(NS(=O)(=O)c2ccc(NC(=O)c3cc(O)c(O)c(O)c3)cc2)cc1</chem>                                           | 2500    | nM |

|               |                                                                                                                              |         |    |
|---------------|------------------------------------------------------------------------------------------------------------------------------|---------|----|
| CHEMBL557319  | <chem>Cc1cc(C)cc(NS(=O)(=O)c2ccc(NC(=O)c3cc(O)c(O)c(O)c3)cc2)c1</chem>                                                       | 2500    | nM |
| CHEMBL564494  | <chem>OC(=O)\C(=C\C(=O)c1cccc(Br)c1)\O</chem>                                                                                | 2500    | nM |
| CHEMBL1223975 | <chem>COc1ccc2C(=O)C(=C(C(=O)c2c1)C3=C(O)C(=O)c4c5C=CC(C)(C)Oc5ccc4C3=O)C6=C(O)C(=O)c7c8C=CC(C)(C)Oc8ccc7C6=O</chem>         | 2500    | nM |
| CHEMBL3397850 | <chem>COC1=C(N=C(Cc2ccc(F)cc2)N(C)C1=O)C(=O)N3CCN(CCNC(=O)c4cc(O)c(O)c(O)c4)CC3</chem>                                       | 2500    | nM |
| CHEMBL3415838 | <chem>CCOC(=O)\C(=C\C(=O)\C=C\c1cc(en1Cc2ccc(F)cc2)c3ccccc3)\O</chem>                                                        | 2500    | nM |
| CHEMBL1087929 | <chem>Oc1nc(nc(C(=O)NCc2cncs2)c1O)c3cccs3</chem>                                                                             | 2511.89 | nM |
| CHEMBL1214481 | <chem>CCOC(=O)\C(=C\C(=O)c1cn(Cc2ccc(F)cc2Cl)c3ccccc(OC)c13)\O</chem>                                                        | 2560    | nM |
| CHEMBL254727  | <chem>CC(C)S(=O)(=O)Nc1ccc2nc(N)[nH]c2c1</chem>                                                                              | 2600    | nM |
| CHEMBL1928167 | <chem>Cc1c(nnn1Cc2ccc(F)cc2)C(=O)\C=C(/O)\c3cc(O)c(O)c(O)c3</chem>                                                           | 2600    | nM |
| CHEMBL496455  | <chem>CCOC(=O)\C(=C\C(=O)C1=CNc2ccc(Cl)cc2C1=O)\O</chem>                                                                     | 2632.49 | nM |
| CHEMBL405652  | <chem>CCOC(=O)\C(=C\C(=O)c1cn(Cc2ccc(F)cc2)c3c(OC)ccccc13)\O</chem>                                                          | 2640    | nM |
| CHEMBL456158  | <chem>CCOC(=O)\C(=C\C(=O)C1=CN(Cc2ccc(F)cc2)c3cc(Cl)c(Cl)cc3C1=O)\O</chem>                                                   | 2649.53 | nM |
| CHEMBL555734  | <chem>CCOC(=O)CN1N=Cc2cc3CCc4c(OC)c5C(=O)c6c(O)c(C)c(O)cc6C(=O)c5c(O)c4c3c(O)c2C1=O</chem>                                   | 2670    | nM |
| CHEMBL569135  | <chem>Oc1ccc2CN(Cc3ccc(F)c(F)c3F)C(=O)c2c1O</chem>                                                                           | 2700    | nM |
| CHEMBL496143  | <chem>CCOC(=O)\C(=C\C(=O)c1cn(Cc2cc(F)cc(F)c2)c3ccccc(OC)c13)\O</chem>                                                       | 2740    | nM |
| CHEMBL490972  | <chem>COc1cccc(Cc2nnc([nH]2)c3ncc4ccnc4c3O)c1</chem>                                                                         | 2800    | nM |
| CHEMBL2206771 | <chem>CN(C)S(=O)(=O)c1c(C)c(O)c(O)c2C(=O)N(Cc3ccc(F)c(Cl)c3)Cc12</chem>                                                      | 2800    | nM |
| CHEMBL3735239 | <chem>CCOC(=O)c1c(nc(SCc2ccc(cc2)C(=O)\C=C(/O)\C(=O)O)nc1c3ccc(F)c3)c4ccccc4</chem>                                          | 2800    | nM |
| CHEMBL254632  | <chem>Oc1cccc(C(=O)NNC(=O)c2ccccc(O)c2O)c1O</chem>                                                                           | 2828.43 | nM |
| CHEMBL1214478 | <chem>CCOC(=O)\C(=C\C(=O)c1cn(Cc2ccccc(Cl)c2)c3ccccc(OC)c13)\O</chem>                                                        | 2890    | nM |
| CHEMBL3740311 | <chem>COc1ccc(cc1)C2=Cc3ccc(cc3C(CC(=O)C)N2c4ccc(cc4)C#N)[N+](=O)[O-]</chem>                                                 | 2900    | nM |
| CHEMBL1214533 | <chem>CCOC(=O)\C(=C\C(=O)c1cn(Cc2cc(F)ccc2Cl)c3ccccc(OC)c13)\O</chem>                                                        | 2940    | nM |
| CHEMBL30922   | <chem>COC(=O)[C@H](COC(=O)\C=C\c1ccc(OC(=O)C)c(OC(=O)C)c1)NC(=O)\C=C\c2ccc(OC(=O)C)c(OC(=O)C)c2</chem>                       | 3000    | nM |
| CHEMBL226484  | <chem>Cc1ccc2cc(ccc2c1)C(=O)CC(=O)C(=O)O</chem>                                                                              | 3000    | nM |
| CHEMBL249349  | <chem>Cc1ccc(cc1)n2c(SCC(=O)NNC(=O)c3ccccc3O)nnc2c4ccccc4O</chem>                                                            | 3000    | nM |
| CHEMBL457779  | <chem>Cc1cc2c(SC(=NS2(=O)=O)C(=O)c3ccc4ccccc4c3)cc1Cl</chem>                                                                 | 3000    | nM |
| CHEMBL458228  | <chem>Cc1cc2c(SC(NS2(=O)=O)C(=O)c3ccc(Br)cc3)cc1Cl</chem>                                                                    | 3000    | nM |
| CHEMBL564594  | <chem>Oc1ccc2CN(Cc3ccccc(Br)c3)C(=O)c2c1O</chem>                                                                             | 3000    | nM |
| CHEMBL552413  | <chem>Oc1cc(cc(O)c1O)C(=O)Nc2ccc(cc2)S(=O)(=O)Nc3ccc(cc3)[N+](=O)[O-]</chem>                                                 | 3000    | nM |
| CHEMBL558132  | <chem>Oc1cc(cc(O)c1O)C(=O)Nc2ccc(cc2)S(=O)(=O)Nc3ccc(F)c(F)c3F</chem>                                                        | 3000    | nM |
| CHEMBL1223978 | <chem>CC1(C)Oc2ccc3C(=O)C(=C(O)C(=O)c3c2C=C1)C4=C(C(=O)c5c6C=C(C)(C)Oc6ccc5C4=O)C7=C(O)C(=O)c8c9C=CC(C)(C)Oc9ccc8C7=O</chem> | 3000    | nM |
| CHEMBL2216808 | <chem>Oc1ccc(NC(=O)C(=S)NN2C(=S)S\C(=C\c3cc(I)cc(I)c3O)\C2=O)cc1</chem>                                                      | 3000    | nM |
| CHEMBL3334642 | <chem>OC1=C(N=C(NC1=O)c2ccc(F)cc2)C(=O)NCc3ccccc(F)c3</chem>                                                                 | 3000    | nM |
| CHEMBL562425  | <chem>COc1c2CCc3cc4C=NN(C(=N)N)C(=O)c4c(O)c3c2c(O)c5C(=O)c6cc(O)c(C)c(O)c6C(=O)c15</chem>                                    | 3020    | nM |
| CHEMBL3582053 | <chem>CCOC(=O)\C(=C\C(=O)C1=CN(Cc2ccc(F)c(Cl)c2)c3ccccc3C1=O)\O</chem>                                                       | 3100    | nM |
| CHEMBL3740012 | <chem>[O-][N+](=O)CC1N(C(=C2ccc(cc12)[N+](=O)[O-])c3ccccc3)c4ccc(Cl)cc4</chem>                                               | 3100    | nM |
| CHEMBL562741  | <chem>COc1c2CCc3cc(\C=N\NC(=N)N)c(C(=O)O)c(O)c3c2c(O)c4C(=O)c5cc(O)c(C)c(O)c5C(=O)c14</chem>                                 | 3150    | nM |
| CHEMBL1214583 | <chem>CCOC(=O)\C(=C\C(=O)c1cn(Cc2cc(F)cc(Cl)c2)c3ccccc(OC)c13)\O</chem>                                                      | 3170    | nM |
| CHEMBL565676  | <chem>OC(=O)c1cc2ccn(Cc3cc(Cl)cs3)c2en1</chem>                                                                               | 3200    | nM |
| CHEMBL3582063 | <chem>OC(=O)\C(=C\C(=O)C1=CN(Cc2cc(F)ccc2F)c3ccccc3C1=O)\O</chem>                                                            | 3200    | nM |
| CHEMBL3736464 | <chem>CCOC(=O)C1=C(C(C)C)N(Cc2ccc(cc2)C(=O)\C=C(/O)\C(=O)O)C(=O)</chem>                                                      | 3300    | nM |

|               |                                                                                                                                                                                                                    |         |    |
|---------------|--------------------------------------------------------------------------------------------------------------------------------------------------------------------------------------------------------------------|---------|----|
|               | )N=C1c3ccc(OC)cc3                                                                                                                                                                                                  |         |    |
| CHEMBL1774045 | OC1=C2C(=O)N(Cc3ccc(F)c(Cl)c3)C(=O)C2=C4CCCCN4C1=O                                                                                                                                                                 | 3304.54 | nM |
| CHEMBL1214585 | CCOC(=O)\C(=C\C(=O)c1cn(Cc2ccc(Cl)cc2F)c3ccccc(OC)c13)\O                                                                                                                                                           | 3320    | nM |
| CHEMBL404423  | CC(C)(C)C1CCC(CC1)C2=NCc3ccc(cc23)[C@H]4CC4c5ccc6cc(ccc6c5)C(=N)N                                                                                                                                                  | 3400    | nM |
| CHEMBL540405  | COc1c2CCc3cc4C=NN(C(=O)c4c(O)c3c2c(O)c5C(=O)c6cc(O)c(C)c(O)c6C(=O)c15)c7ccc(cc7)C(=O)O                                                                                                                             | 3450    | nM |
| CHEMBL523302  | Oc1c(ncc2cccn12)c3nnc(Cc4cccn4)[nH]3                                                                                                                                                                               | 3500    | nM |
| CHEMBL562110  | Oc1ccc2C(=O)N(Cc3c(F)cccc3Cl)C(=O)c2c1O                                                                                                                                                                            | 3500    | nM |
| CHEMBL568050  | OC(=O)c1cc2ccn(Cc3ccc(F)cc3F)c2cn1                                                                                                                                                                                 | 3500    | nM |
| CHEMBL3397847 | COC1=C(N=C(Cc2ccc(C)cc2)N(C)C1=O)C(=O)N3CCN(CCCNC(=O)c4cc(O)c(O)c(O)c4)CC3                                                                                                                                         | 3500    | nM |
| CHEMBL3582078 | CCOC(=O)\C(=C\C(=O)C1=CN(Cc2ccc3ccccc3n2)c4ccccc4C1=O)\O                                                                                                                                                           | 3500    | nM |
| CHEMBL3116308 | OP(=O)(O)C(Cc1ccc(Cl)c(Cl)c1)(Cc2ccc(Cl)c(Cl)c2)P(=O)(O)O                                                                                                                                                          | 3577.71 | nM |
| CHEMBL226485  | OC(=O)C(=O)CC(=O)c1ccc2ccc3ccccc3c2c1                                                                                                                                                                              | 3600    | nM |
| CHEMBL3735086 | CCOC(=O)C1=C(C(C)C)N(Cc2ccc(cc2)C(=O)\C=C(/O)\C(=O)O)C(=O)N=C1c3ccc(F)cc3                                                                                                                                          | 3600    | nM |
| CHEMBL576026  | OC(=O)c1cc2ccn(Cc3ccc(F)c(F)c3F)c2cn1                                                                                                                                                                              | 3690    | nM |
| CHEMBL260778  | OC(=O)[C@@H](Cc1cc(O)c(O)cc1[N+](=O)[O-])OC(=O)\C=C\c2ccc(O)c(O)c2                                                                                                                                                 | 3700    | nM |
| CHEMBL550086  | Oc1ccc2CN(Cc3cc(F)c(F)cc3F)C(=O)c2c1O                                                                                                                                                                              | 3700    | nM |
| CHEMBL3582045 | CCOC(=O)\C(=C\C(=O)C1=CN(Cc2cc(F)ccc2F)c3ccccc3C1=O)\O                                                                                                                                                             | 3700    | nM |
| CHEMBL242139  | CN1CCN(C(C1)C2=NC(=C(O)C(=O)N2C)C(=O)NCc3ccc(F)cc3)C(=O)C                                                                                                                                                          | 4000    | nM |
| CHEMBL241397  | OC(=O)c1cc(ccc1Cl)c2oc(\C=N\Nc3nc4nonc4nc3Nc5ccccc5F)cc2                                                                                                                                                           | 4000    | nM |
| CHEMBL506605  | CN1[C@@H](Cc2ccc(Oc3cc4cc(c3O)c5ccc6c(C[C@@H](NC(=O)C(=O)c7cc(Cl)c(O)c(Cl)c7)C(=O)N[C@@H](C(=O)N[C@@H]4C(=O)N[C@@H](C1=O)c8cc(Cl)c(O)c(Cl)c8)c9cc(Cl)c(O)c(Cl)c9)c[nH]c6c5)cc2)C(=O)N[C@@H](C(=O)O)c%10ccc(O)cc%10 | 4000    | nM |
| CHEMBL461996  | Cc1cc(c(S)cc1Cl)S(=O)(=O)NC2=Nc3cc(sc3C(=O)N2Cc4ccccc4)C(C)(C)C                                                                                                                                                    | 4000    | nM |
| CHEMBL459890  | Cc1cc(c(S)cc1Cl)S(=O)(=O)NC2=Nc3cc(sc3C(=O)N2Cc4ccccc4)c5ccc(Cl)cc5                                                                                                                                                | 4000    | nM |
| CHEMBL561849  | Oc1ccc2CN(Cc3cc(F)c(F)c(F)c3)C(=O)c2c1O                                                                                                                                                                            | 4000    | nM |
| CHEMBL560706  | Oc1ccc2CN(Cc3cccc(I)c3)C(=O)c2c1O                                                                                                                                                                                  | 4000    | nM |
| CHEMBL550978  | Oc1ccc2C(=O)N(Cc3c(F)ccc(F)c3Cl)C(=O)c2c1O                                                                                                                                                                         | 4000    | nM |
| CHEMBL540719  | Oc1ccc2CN(Cc3cccc(Cl)c3)C(=O)c2c1O                                                                                                                                                                                 | 4000    | nM |
| CHEMBL576652  | Oc1ccc2C(=O)N(C3Cc4ccccc4C3)C(=O)c2c1O                                                                                                                                                                             | 4000    | nM |
| CHEMBL1223981 | CC1(C)Oc2ccc3C(=O)C(=C(O)C(=O)c3c2C=C1)C4=C(C(=O)N(Cc5ccc5)C4=O)C6=C(O)C(=O)c7c8C=CC(C)(C)Oc8ccc7C6=O                                                                                                              | 4000    | nM |
| CHEMBL3087622 | CCOC(=O)C(=O)CC(=O)\C=C\c1cccn1Cc2c(F)cccc2F                                                                                                                                                                       | 4000    | nM |
| CHEMBL3334639 | OC1=C(N=C(NC1=O)c2ccc(F)cc2)C(=O)NCCc3ccc(F)cc3                                                                                                                                                                    | 4000    | nM |
| CHEMBL3334645 | OC1=C(N=C(NC1=O)c2ccc(F)cc2)C(=O)NCc3ccc(F)c(Cl)c3                                                                                                                                                                 | 4000    | nM |
| CHEMBL552100  | COc1c2CCc3cc4C=NNC(=O)c4c(O)c3c2c(O)c5C(=O)c6cc(O)c(C)c(O)c6C(=O)c15                                                                                                                                               | 4060    | nM |
| CHEMBL46032   | COc1ccc(Cn2cccc2\C=C\C(=O)CC(=O)C(=O)O)cc1                                                                                                                                                                         | 4100    | nM |
| CHEMBL299873  | OC(=O)C(=O)CC(=O)\C=C\c1cccn1Cc2ccc(Cl)cc2                                                                                                                                                                         | 4100    | nM |
| CHEMBL1761475 | CCC1=C(N(COCCc2ccc(F)cc2)C(=O)N(O)C1=O)C(=O)c3ccccc3                                                                                                                                                               | 4100    | nM |
| CHEMBL131784  | Cc1cc(c(S)cc1Cl)S(=O)(=O)Nc2nnc3c4sc(C)c4nnc23                                                                                                                                                                     | 4260    | nM |
| CHEMBL3415835 | CCOC(=O)\C(=C\C(=O)\C=C\c1cc(en1Cc2ccccc2)C(=O)c3ccc(F)cc3)\O                                                                                                                                                      | 4300    | nM |
| CHEMBL555979  | Oc1ccc2CN(Cc3cc(Cl)c(F)cc3F)C(=O)c2c1O                                                                                                                                                                             | 4400    | nM |
| CHEMBL562871  | COc1ccc(NS(=O)(=O)c2ccc(NC(=O)c3cc(O)c(O)c(O)c3)cc2)cc1                                                                                                                                                            | 4500    | nM |

|               |                                                                                                                                                                                                                                 |         |    |
|---------------|---------------------------------------------------------------------------------------------------------------------------------------------------------------------------------------------------------------------------------|---------|----|
| CHEMBL1213850 | <chem>COc1cccc2c1c(en2Cc3ccc(Cl)c(F)c3)C(=O)\C=C(/O)\C(=O)O</chem>                                                                                                                                                              | 4580    | nM |
| CHEMBL366861  | <chem>Cc1cc(O)c(C=O)c2Oe3c(C)c(C(=O)O)c(O)c(COC(=O)\C=C\C(=O)O)c3OC(=O)c12</chem>                                                                                                                                               | 4600    | nM |
| CHEMBL490970  | <chem>Oc1c(ncc2ccnc12)c3nnc(Cc4cncnc4)[nH]3</chem>                                                                                                                                                                              | 4600    | nM |
| CHEMBL564339  | <chem>COc1c2CCc3cc4C=NN(CC(=O)O)C(=O)c4c(O)c3c2c(O)c5C(=O)c6cc(O)c(C)c(O)c6C(=O)c15</chem>                                                                                                                                      | 4620    | nM |
| CHEMBL565954  | <chem>Oc1ccc2C(=O)N([C@H]3CCc4cccc34)C(=O)c2c1O</chem>                                                                                                                                                                          | 4647.58 | nM |
| CHEMBL453488  | <chem>CC(C)C(=C)CC[C@@H](C)[C@H]1CC=C2C3=C([C@@H](O)[C@H](OC(=O)C)[C@]12C)[C@@]4(C)CC[C@H](OS(=O)(=O)O)C(C)(C)[C@@H]4CC3</chem>                                                                                                 | 4800    | nM |
| CHEMBL472374  | <chem>Cc1cc(c(S)cc1Cl)S(=O)(=O)Nc2nc(N)n[nH]2</chem>                                                                                                                                                                            | 4900    | nM |
| CHEMBL1631332 | <chem>[Na+].COc1cc(\C=C\c2ccc3ccc(C(=O)[O-])c(O)c3n2)cc(OC)c1O</chem>                                                                                                                                                           | 4900    | nM |
| CHEMBL2236598 | <chem>CCOC(=O)\C(=C\C(=O)C1=CN(Cc2cccc(F)c2)c3cccc3C1=O)\O</chem>                                                                                                                                                               | 4900    | nM |
| CHEMBL3087329 | <chem>OC(=O)C(=O)CC(=O)\C=C\c1cccn1Cc2ccc(Cl)cc2Cl</chem>                                                                                                                                                                       | 4900    | nM |
| CHEMBL250975  | <chem>Oc1cccc1C(=O)NNC(=O)CSc2nnc(c3ccc(Cl)cc3)n2c4cccc4</chem>                                                                                                                                                                 | 5000    | nM |
| CHEMBL525803  | <chem>CN1[C@@H](Cc2ccc(Oc3cc4ccc(c3O)c5cccc6c(C[C@@H](NC(=O)C(=O)c7cc(Cl)c(O)c(Cl)c7)C(=O)N[C@@H](C(=O)N[C@H]4C(=O)N[C@@H](C1=O)c8cc(Cl)c(O)c(Cl)c8)c9cc(Cl)c(O)c(Cl)c9)c[nH]c56)cc2)C(=O)N[C@@H](C(=O)O)c%10ccc(O)cc%10</chem> | 5000    | nM |
| CHEMBL511191  | <chem>CCCCCN1C(=O)C(=C(O)c2cc(Cc3ccc(F)cc3)ccc12)C(=O)O</chem>                                                                                                                                                                  | 5000    | nM |
| CHEMBL1223976 | <chem>CCCOc1ccc2C(=O)C(=C(C(=O)c2c1)C3=C(O)C(=O)c4c5C=CC(C)(C)Oc5ccc4C3=O)C6=C(O)C(=O)c7c8C=CC(C)(C)Oc8ccc7C6=O</chem>                                                                                                          | 5000    | nM |
| CHEMBL1813504 | <chem>Oc1cc(cc(C(=O)NCc2ccc(F)cc2)c1O)S(=O)(=O)N3CCCC3</chem>                                                                                                                                                                   | 5000    | nM |
| CHEMBL551241  | <chem>Oc1ccc2C(=O)N(Cc3ccc(F)cc3)C(=O)c2c1O</chem>                                                                                                                                                                              | 5147.82 | nM |
| CHEMBL3742287 | <chem>COc1ccc(cc1)C2=Cc3ccc(F)cc3C(CC(=O)C(C)O)N2c4ccc(cc4)[N+](=O)[O-]</chem>                                                                                                                                                  | 5200    | nM |
| CHEMBL2206231 | <chem>CC(C)c1cc2CN(Cc3ccc(F)c(Cl)c3)C(=O)c2c(O)c1O</chem>                                                                                                                                                                       | 5400    | nM |
| CHEMBL565266  | <chem>OC(=O)c1cc2ccn(Cc3cccc(Cl)c3Cl)c2en1</chem>                                                                                                                                                                               | 5420    | nM |
| CHEMBL1270108 | <chem>OC(=O)C1=NN(C(=O)/C/1=C\c2ccc(O)c(OCc3ccc(F)cc3)c2)c4cccc(c4)[N+](=O)[O-]</chem>                                                                                                                                          | 5477.23 | nM |
| CHEMBL3582046 | <chem>CCOC(=O)\C(=C\C(=O)C1=CN(Cc2ccc(F)c(F)c2)c3cccc3C1=O)\O</chem>                                                                                                                                                            | 5500    | nM |
| CHEMBL1213849 | <chem>COc1cccc2c1c(en2Cc3ccc(Cl)cc3F)C(=O)\C=C(/O)\C(=O)O</chem>                                                                                                                                                                | 5520    | nM |
| CHEMBL454134  | <chem>C[C@H](CCCC1(CO1)C(C)(C)O)[C@H]2CC[C@H]3C4=C([C@@H](O)[C@H](OC(=O)C)[C@]23C)[C@@]5(C)C[C@H](OC(=O)CCCCCCCCCCCCCO)[C@H](OS(=O)(=O)O)C(C)(C)[C@@H]5CC4</chem>                                                               | 5600    | nM |
| CHEMBL561619  | <chem>OC[C@H](C1CCCC1)N2C=C(C(=O)O)C(=O)c3cc(Cc4cccc(Cl)c4F)c3cc23</chem>                                                                                                                                                       | 5600    | nM |
| CHEMBL2407275 | <chem>CN(C(=O)C1C(=O)N(O)C(=O)c2cccc12)c3cccc3</chem>                                                                                                                                                                           | 5600    | nM |
| CHEMBL3735646 | <chem>CCOC(=O)C1=C(CC)N(Cc2ccc(cc2)C(=O)\C=C(/O)\C(=O)O)C(=O)N=C1c3ccc(OC)cc3</chem>                                                                                                                                            | 5600    | nM |
| CHEMBL583059  | <chem>OC(=O)\C(=C\C(=O)c1cccc1Cc2cccc2)\O</chem>                                                                                                                                                                                | 5670    | nM |
| CHEMBL550220  | <chem>COc1cc2N(C=C(C(=O)O)C(=O)c2cc1Cc3cccc(Cl)c3F)[C@H](CO)C(C)(C)C</chem>                                                                                                                                                     | 5800    | nM |
| CHEMBL550080  | <chem>CCC[C@@H](CO)N1C=C(C(=O)O)C(=O)c2cc(Cc3cccc(Cl)c3F)c(OC)cc12</chem>                                                                                                                                                       | 5800    | nM |
| CHEMBL250367  | <chem>COc1cccc1n2c(SCC(=O)NNC(=O)c3cccc3O)nnc2c4cccc4O</chem>                                                                                                                                                                   | 6000    | nM |
| CHEMBL400055  | <chem>Oc1cccc(C(=O)NN2Cc3ccc(O)c(O)c3C2=O)c1O</chem>                                                                                                                                                                            | 6000    | nM |
| CHEMBL448564  | <chem>CN1[C@@H](Cc2ccc(Oc3cc4ccc(c3O)c5cccc6c(C[C@@H](N)C(=O)N[C@@H](C(=O)N[C@H]4C(=O)N[C@@H](C1=O)c7cc(Cl)c(O)c(Cl)c7)c8cc(Cl)c(O)c(Cl)c8)c[nH]c56)cc2)C(=O)O</chem>                                                           | 6000    | nM |
| CHEMBL461997  | <chem>Cc1cc(c(S)cc1Cl)S(=O)(=O)NC2=Nc3cc(sc3C(=O)N2Cc4cccc4)c5ccc5</chem>                                                                                                                                                       | 6000    | nM |
| CHEMBL459891  | <chem>Cc1cc(c(S)cc1Cl)S(=O)(=O)NC2=Nc3cc(sc3C(=O)N2Cc4occc4)c5ccsc5</chem>                                                                                                                                                      | 6000    | nM |



|               |                                                                                                                   |         |    |
|---------------|-------------------------------------------------------------------------------------------------------------------|---------|----|
| CHEMBL464212  | CN1C(=O)C(=C(O)c2cc(Cc3ccccc3)ccc12)C(=O)O                                                                        | 6000    | nM |
| CHEMBL565125  | CC(C)(C)[C@H](CO)N1C=C(C(=O)O)C(=O)c2cc(Cc3cccc(Cl)c3F)cc12                                                       | 6000    | nM |
| CHEMBL540720  | Oc1ccc2CN(Cc3ccc(Cl)c(F)c3)C(=O)c2c1O                                                                             | 6000    | nM |
| CHEMBL1223980 | CC1(C)CCc2c(O1)ccc3C(=O)C(=C(C(=O)c23)C4=C(O)C(=O)c5c6C=CC(C)(C)Oc6ccc5C4=O)C7=C(O)C(=O)c8c9C=CC(C)(C)Oc9ccc8C7=O | 6000    | nM |
| CHEMBL3087333 | OC(=O)C(=O)CC(=O)\C=C\c1cccn1Cc2ccccc2C#N                                                                         | 6000    | nM |
| CHEMBL3087634 | CCOC(=O)C(=O)CC(=O)\C=C\c1cccn1Cc2ccccc(Cl)c2                                                                     | 6000    | nM |
| CHEMBL3334641 | OC1=C(N=C(NC1=O)c2ccc(F)cc2)C(=O)NCc3ccc(O)cc3                                                                    | 6000    | nM |
| CHEMBL538448  | COc1c2CCc3cc(\C=N\NC(=O)c4ccccc4O)c(C(=O)O)c(O)c3c2c(O)c5C(=O)c6cc(O)c(C)c(O)c6C(=O)c15                           | 6090    | nM |
| CHEMBL3735570 | CCOC(=O)c1c(nc(SCc2ccc(cc2)C(=O)\C=C(/O)\C(=O)O)nc1c3ccccc3)c4ccccc4                                              | 6100    | nM |
| CHEMBL239057  | CCOc1ccc(cc1)c2c(C#N)c(N)nc(SCC(=O)C3=Cc4cc(Br)cc(Br)c4OC3=O)c2C#N                                                | 6196.77 | nM |
| CHEMBL554095  | COc1c2CCc3cc4C=NN(CCOC(=O)C)C(=O)c4c(O)c3c2c(O)c5C(=O)c6cc(O)c(C)c(O)c6C(=O)c15                                   | 6280    | nM |
| CHEMBL523468  | COc1ccc(Cc2nnc([nH]2)c3ncc4ccnc4c3O)cc1OC                                                                         | 6300    | nM |
| CHEMBL557286  | CCCN1N=Cc2cc3CCc4c(OC)c5C(=O)c6c(O)c(C)c(O)cc6C(=O)c5c(O)c4c3c(O)c2C1=O                                           | 6340    | nM |
| CHEMBL3739763 | COc1ccc(cc1)C2=Cc3ccc(cc3C(CC(=O)C)N2c4ccc(O)cc4)[N+](=O)[O-]                                                     | 6600    | nM |
| CHEMBL560836  | COc1cc2N(C=C(C(=O)O)C(=O)c2cc1Cc3cccc(Cl)c3F)[C@H](CO)C4CCCC4                                                     | 6700    | nM |
| CHEMBL567591  | Oc1ccc2C(=O)N(CCc3ccccc3)C(=O)c2c1O                                                                               | 6800    | nM |
| CHEMBL2206230 | CCCCc1cc2CN(Cc3ccc(F)c(Cl)c3)C(=O)c2c(O)c1O                                                                       | 6800    | nM |
| CHEMBL236066  | Cc1ccc(cc1)C(=O)C2=C(O)C(=O)N(C2c3cccc(Cl)c3)c4ncc(s4)S(=O)(=O)c5ccc(cc5)[N+](=O)[O-]                             | 6985.7  | nM |
| CHEMBL226434  | COC(=O)c1ccccc1c2ccc(cc2[N+](=O)[O-])C(=O)CC(=O)C(=O)O                                                            | 7000    | nM |
| CHEMBL375956  | OC(=O)C(=O)CC(=O)c1ccc2ccccc2c1                                                                                   | 7000    | nM |
| CHEMBL457778  | Cc1cc2e(SC(=NS2(=O)=O)C(=O)c3ccc(Cl)c(Cl)c3)cc1Cl                                                                 | 7000    | nM |
| CHEMBL458432  | Cc1cc(Cl)cc2SC(=NS(=O)(=O)c12)C(=O)c3ccc4ccccc4c3                                                                 | 7000    | nM |
| CHEMBL1761476 | CCC1=C(N(COCCc2ccc(F)cc2)C(=O)N(O)C1=O)C(=O)c3cc(C)cc(C)c3                                                        | 7000    | nM |
| CHEMBL3334643 | OC1=C(N=C(NC1=O)c2ccc(F)cc2)C(=O)NCc3ccccc3F                                                                      | 7000    | nM |
| CHEMBL3582068 | Cc1ccc(CN2C=C(C(=O)\C=C(/O)\C(=O)O)C(=O)c3ccccc23)c(C)c1                                                          | 7000    | nM |
| CHEMBL456791  | CCOC(=O)\C(=C\C(=O)C1=CN(Cc2ccc(F)cc2)c3cc(Cl)ccc3C1=O)\O                                                         | 7099.3  | nM |
| CHEMBL3125975 | OC1=C(C(=O)NCc2ccc(F)cc2F)C(=O)Nc3ncccc13                                                                         | 7100    | nM |
| CHEMBL477328  | O=C(CN1CCCC1)Nc2ccc(Cc3ccc(NC(=O)CN4CCCC4)cc3)cc2                                                                 | 7290    | nM |
| CHEMBL585005  | OC(=O)c1cc2ccn(Cc3ccc(F)cc3)c2cn1                                                                                 | 7350    | nM |
| CHEMBL129147  | Cc1cc2nc3nc(N)nc(NS(=O)(=O)c4cc(C)c(Cl)cc4S)n3c2cc1C                                                              | 7410    | nM |
| CHEMBL573623  | OC(=O)\C(=C\C(=O)c1cccn1Cc2ccc(cc2)c3ccccc3)\O                                                                    | 7500    | nM |
| CHEMBL406929  | CCOC(=O)\C(=C\C(=O)c1cn(Cc2ccc(F)cc2)c3ccc(OC)cc13)\O                                                             | 7550    | nM |
| CHEMBL3739984 | COc1ccc(cc1)C2=Cc3ccc(F)cc3C(CC(=O)CO)N2c4ccc(cc4)C#N                                                             | 7600    | nM |
| CHEMBL550839  | COc1c2CCc3cc4C(O)N(N(C)C)C(=O)c4c(O)c3c2c(O)c5C(=O)c6cc(O)c(C)c(O)c6C(=O)c15                                      | 7700    | nM |
| CHEMBL1270510 | NCc1ccc(cc1)c2ccccc2)C3=CC(=O)N(O)c4ncccc34                                                                       | 7800    | nM |
| CHEMBL3125973 | OC1=C(C(=O)NCc2ccc(F)c(Cl)c2)C(=O)Nc3ncccc13                                                                      | 7800    | nM |
| CHEMBL491685  | Cn1nc(nc1Cc2ccc(F)cc2)c3ncc4ccnc4c3O                                                                              | 7900    | nM |
| CHEMBL3742037 | COc1ccc(cc1)C2=Cc3ccc(F)cc3C(CC(=O)C(C)O)N2c4ccc(F)cc4                                                            | 7900    | nM |
| CHEMBL457850  | CCOC(=O)\C(=C\C(=O)C1=CN(Cc2ccc(F)cc2)c3ccc(Cl)cc3C1=O)\O                                                         | 7937.25 | nM |
| CHEMBL385951  | Oc1nc(nc(C(=O)NCc2ccccc2)c1O)c3ccccc3                                                                             | 8000    | nM |

|               |                                                                                                                                                                                                     |          |    |
|---------------|-----------------------------------------------------------------------------------------------------------------------------------------------------------------------------------------------------|----------|----|
| CHEMBL250777  | <chem>Oc1ccccc1C(=O)NNC(=O)CSc2nnc(Cc3ccccc3)n2c4cccc(Cl)c4</chem>                                                                                                                                  | 8000     | nM |
| CHEMBL254853  | <chem>COc1ccccc(C(=O)NNC(=O)c2cc3ccccc3cc2O)c1O</chem>                                                                                                                                              | 8000     | nM |
| CHEMBL507121  | <chem>CN1[C@@H](Cc2ccc(Oc3cc4ccc(c3O)c5ccccc6c(C[C@@H](NC(=O)C(=O)c7cc(Cl)c(O)c(Cl)c7)C(=O)N[C@@H](C(=O)N[C@@H]4C(=O)N[C@@H](C1=O)c8cc(Cl)c(O)c(Cl)c8)c9cc(Cl)c(O)c(Cl)c9)[nH]c56)cc2)C(=O)O</chem> | 8000     | nM |
| CHEMBL475854  | <chem>OC(=O)\C(=C\C(=O)c1ccccc(NC(=O)c2cc(cc(c2O)[N+](=O)[O-])[N+](=O)[O-])c1)\O</chem>                                                                                                             | 8000     | nM |
| CHEMBL458653  | <chem>Clc1ccc2c(SC(=NS2(=O)=O)C(=O)c3ccc4ccccc4c3)c1</chem>                                                                                                                                         | 8000     | nM |
| CHEMBL562442  | <chem>Oc1ccc2CN(Cc3c(F)c(F)c(F)c3F)C(=O)c2c1O</chem>                                                                                                                                                | 8000     | nM |
| CHEMBL551736  | <chem>Cc1ccc(NS(=O)(=O)c2ccc(NC(=O)c3cc(O)c(O)c(O)c3)cc2)cc1C</chem>                                                                                                                                | 8000     | nM |
| CHEMBL1813506 | <chem>CC(C)(C)NS(=O)(=O)c1cc(O)c(O)c(c1)C(=O)NCc2ccc(F)cc2</chem>                                                                                                                                   | 8000     | nM |
| CHEMBL3087627 | <chem>CCOC(=O)C(=O)CC(=O)\C=C\c1cccn1Cc2cc(Cl)cc(Cl)c2</chem>                                                                                                                                       | 8000     | nM |
| CHEMBL3087792 | <chem>CCOC(=O)C(=O)CC(=O)\C=C\c1cccn1Cc2cccc(C)c2</chem>                                                                                                                                            | 8000     | nM |
| CHEMBL3334646 | <chem>OC1=C(N=C(NC1=O)c2ccc(F)cc2)C(=O)NCc3cc(F)c(F)c(F)c3</chem>                                                                                                                                   | 8000     | nM |
| CHEMBL1270511 | <chem>NCc1ccc(cc1)c2cccc(CC3=CC(=O)N(O)c4ncccc34)c2</chem>                                                                                                                                          | 8100     | nM |
| CHEMBL3125974 | <chem>OC1=C(C(=O)NCc2ccc(F)c(F)c2)C(=O)Nc3ncccc13</chem>                                                                                                                                            | 8100     | nM |
| CHEMBL563677  | <chem>CCC[C@@H](CO)N1C=C(C(=O)O)C(=O)c2cc(Cc3ccccc(Cl)c3F)ccc12</chem>                                                                                                                              | 8200     | nM |
| CHEMBL1214479 | <chem>CCOC(=O)\C(=C\C(=O)c1cn(Cc2ccc(Cl)cc2)c3ccccc(OC)c13)\O</chem>                                                                                                                                | 8260     | nM |
| CHEMBL399581  | <chem>Oc1ccccc(\C=N\NC(=O)c2cccc(O)c2O)c1O</chem>                                                                                                                                                   | 8378.54  | nM |
| CHEMBL2297149 | <chem>NNS(=O)(=O)c1ccccc(OCC(=O)O)c1</chem>                                                                                                                                                         | 8700     | nM |
| CHEMBL569371  | <chem>Oc1ccc2CN(Cc3c(F)ccc(F)c3Cl)C(=O)c2c1O</chem>                                                                                                                                                 | 8900     | nM |
| CHEMBL398969  | <chem>Oc1ccccc1C(=O)NNC(=O)CSc2nnc(c3ccccc3O)n2Cc4ccccc4</chem>                                                                                                                                     | 9000     | nM |
| CHEMBL250574  | <chem>Oc1ccccc1C(=O)NNC(=O)CSc2nnc(c3ccccc3)n2Cc4ccccc4</chem>                                                                                                                                      | 9000     | nM |
| CHEMBL464213  | <chem>CCCCCN1C(=O)C(=C(O)c2ccccc12)C(=O)Nc3cc(ccc3O)[N+](=O)[O-]</chem>                                                                                                                             | 9000     | nM |
| CHEMBL446297  | <chem>CC(C)C(=C)CC[C@@H](C)[C@H]1CC=C2C3=C([C@@H](O)[C@H](OC(=O)C)[C@]12C)[C@@]4(C)C[C@H](O)[C@H](OS(=O)(=O)O)C(C)(C)[C@@H]4CC3</chem>                                                              | 9000     | nM |
| CHEMBL549816  | <chem>CC[C@@H](CO)N1C=C(C(=O)O)C(=O)c2cc(Cc3ccccc(Cl)c3F)ccc12</chem>                                                                                                                               | 9000     | nM |
| CHEMBL583869  | <chem>C[C@@H](C1CCCc2ccccc12)N3Cc4ccc(O)c(O)c4C3=O</chem>                                                                                                                                           | 9000     | nM |
| CHEMBL1223979 | <chem>CC1(C)CCc2c(O1)ccc3C(=O)C(=C(O)C(=O)c23)C4=C(C(=O)c5c6CC</chem>                                                                                                                               | 9000     | nM |
| CHEMBL3087635 | <chem>C(C)(C)Oc6ccc5C4=O)C7=C(O)C(=O)c8c9CCC(C)(C)Oc9ccc8C7=O</chem>                                                                                                                                | 9000     | nM |
| CHEMBL3087635 | <chem>CCOC(=O)C(=O)CC(=O)\C=C\c1cccn1Cc2ccccc2C#N</chem>                                                                                                                                            | 9000     | nM |
| CHEMBL1270417 | <chem>NCc1ccccc(e1)c2ccccc(e2)C3=CC(=O)N(O)c4ncccc34</chem>                                                                                                                                         | 9100     | nM |
| CHEMBL462081  | <chem>Clc1ccc2c(SC(NS2(=O)=O)C(=O)c3ccc4ccccc4c3)c1</chem>                                                                                                                                          | 9165.15  | nM |
| CHEMBL1214480 | <chem>CCOC(=O)\C(=C\C(=O)c1cn(Cc2ccc(F)c2Cl)c3ccccc(OC)c13)\O</chem>                                                                                                                                | 9200     | nM |
| CHEMBL396335  | <chem>CC1(C)OC(=O)C2([C@H](CC(=O)C[C@H]2c3c[nH]c4ccccc34)c5occc5)C(=O)O1</chem>                                                                                                                     | 9600     | nM |
| CHEMBL557891  | <chem>OC[C@@H](N1C=C(C(=O)O)C(=O)c2cc(Cc3ccccc(Cl)c3F)ccc12)c4ccc</chem>                                                                                                                            | 9800     | nM |
| CHEMBL253138  | <chem>cc4</chem>                                                                                                                                                                                    | 9800     | nM |
| CHEMBL253138  | <chem>Oc1ccc2CN(Cc3ccc(F)cc3)C(=O)c2c1O</chem>                                                                                                                                                      | 10000    | nM |
| CHEMBL254527  | <chem>OC(=O)\C(=C(/C#N)\c1cn(c2ccc(F)cc2)c3ccccc13)\O</chem>                                                                                                                                        | 10000    | nM |
| CHEMBL457536  | <chem>Cc1cc2c(SC(NS2(=O)=O)C(=O)c3ccc(Cl)c(Cl)c3)cc1Cl</chem>                                                                                                                                       | 10000    | nM |
| CHEMBL456024  | <chem>Clc1ccc(cc1)C(=O)C2NS(=O)(=O)c3ccc(Cl)cc3S2</chem>                                                                                                                                            | 10000    | nM |
| CHEMBL1223983 | <chem>COc1ccc2C(=O)C(=C(O)C(=O)c2c1)C3=C(C(=O)c4ccccc4C3=O)C5=C(O)C(=O)c6cc(OC)ccc6C5=O</chem>                                                                                                      | 10000    | nM |
| CHEMBL1224084 | <chem>COc1cc2C(=O)C(=C(C(=O)c2cc1OC)C3=C(C(=O)c4cc(OC)c(OC)cc4</chem>                                                                                                                               | 10000    | nM |
| CHEMBL1224084 | <chem>C3=O)C5=C(O)C(=O)c6cc(OC)c(OC)cc6C5=O)O</chem>                                                                                                                                                | 10000    | nM |
| CHEMBL2297143 | <chem>Cc1ccc(cc1)n2ncnc2c3nc4ccccc4nc3NS(=O)(=O)c5cc(C(=O)Nc6ccccc6)c(Cl)cc5S</chem>                                                                                                                | 10000    | nM |
| CHEMBL3334648 | <chem>OC1=C(N=C(Cc2ccc(F)cc2)NC1=O)C(=O)NCc3ccc(F)cc3</chem>                                                                                                                                        | 10000    | nM |
| CHEMBL576837  | <chem>C[C@H](N1Cc2ccc(O)c(O)c2C1=O)c3ccc4ccccc4c3</chem>                                                                                                                                            | 10507.14 | nM |

|               |                                                                                                                                                                                                                                     |          |    |
|---------------|-------------------------------------------------------------------------------------------------------------------------------------------------------------------------------------------------------------------------------------|----------|----|
| CHEMBL3741789 | <chem>COc1ccc(cc1)C2=Cc3ccc(F)cc3C(CC(=O)C(C)O)N2c4ccc(C)cc4</chem>                                                                                                                                                                 | 10600    | nM |
| CHEMBL1774044 | <chem>OC1=C2C(=O)N(Cc3ccc(F)c(Cl)c3)C(=O)C2=C4CCCN4C1=O</chem>                                                                                                                                                                      | 10900    | nM |
| CHEMBL401049  | <chem>Oc1ccc(Br)cc1\C=N\Nc2nc3nonc3nc2Nc4ccc(F)cc4</chem>                                                                                                                                                                           | 11000    | nM |
| CHEMBL252775  | <chem>Oc1ccc2CN(N3C(=O)c4cccc(O)c4C3=O)C(=O)c2c1O</chem>                                                                                                                                                                            | 11000    | nM |
| CHEMBL478246  | <chem>CN(C)c1ccc(\C=C\C(=O)C2=C(O)C=C(C)OC2=O)s1</chem>                                                                                                                                                                             | 11000    | nM |
| CHEMBL1269999 | <chem>COc1ccc(\C=C\2/C(=O)N(N=C2C(=O)O)c3cccc(c3)[N+](=O)[O-])cc1Cc4ccc(F)cc4</chem>                                                                                                                                                | 11000    | nM |
| CHEMBL1270406 | <chem>COc1ccc(\C=C\2/C(=O)N(N=C2C(F)(F)F)c3cccc(Br)c3)cc1Cc4ccc(F)cc4</chem>                                                                                                                                                        | 11000    | nM |
| CHEMBL1813508 | <chem>Oc1cc(cc(C(=O)NCc2ccc(cc2)C(F)(F)F)c1O)S(=O)(=O)N3CCCCC3</chem>                                                                                                                                                               | 11000    | nM |
| CHEMBL3087633 | <chem>CCOC(=O)C(=O)CC(=O)\C=C\c1cccn1Cc2cccc(F)c2</chem>                                                                                                                                                                            | 11000    | nM |
| CHEMBL3582047 | <chem>CCOC(=O)\C(=C\C(=O)C1=CN(Cc2cc(F)cc(F)c2)c3cccc3C1=O)\O</chem>                                                                                                                                                                | 11000    | nM |
| CHEMBL457106  | <chem>Clc1ccc2c(SC(NS2(=O)=O)C(=O)c3ccc(Cl)c(Cl)c3)c1</chem>                                                                                                                                                                        | 11180.34 | nM |
| CHEMBL573638  | <chem>OC(=O)\C(=C\C(=O)c1ccc(Oc2ccccc2)cc1)\O</chem>                                                                                                                                                                                | 11400    | nM |
| CHEMBL443983  | <chem>CC(C)C(=C)CC[C@@H](C)[C@H]1CC=C2C3=C([C@@H](O)[C@H](OC(=O)C)[C@]12C)[C@@]4(C)C[C@@H](OC(=O)CN)[C@H](OC(=O)CN)C(C)(C)[C@@H]4CC3</chem>                                                                                         | 11500    | nM |
| CHEMBL2206229 | <chem>Cc1cc2CN(Cc3ccc(F)c(Cl)c3)C(=O)c2c(O)c1O</chem>                                                                                                                                                                               | 11500    | nM |
| CHEMBL444733  | <chem>Cc1cc2c(SC(NS2(=O)=O)C(=O)c3ccccc3)cc1Cl</chem>                                                                                                                                                                               | 11618.95 | nM |
| CHEMBL514422  | <chem>CCOC(=O)\C(=C\C(=O)C1=CN(Cc2ccc(F)cc2)c3c(F)cccc3C1=O)\O</chem>                                                                                                                                                               | 11627.55 | nM |
| CHEMBL3742275 | <chem>COc1ccc(cc1)C2=Cc3ccc(F)cc3C(CC(=O)C(C)O)N2c4ccc(Cl)cc4</chem>                                                                                                                                                                | 11800    | nM |
| CHEMBL239485  | <chem>Oc1cc2ccccc2cc1C(=O)NNC(=O)COc3ccc4ccccc4c3</chem>                                                                                                                                                                            | 12000    | nM |
| CHEMBL401050  | <chem>O=C(CSc1nc(SCC(=O)NCc2occc2)nc(SCC(=O)NCc3occc3)n1)NCc4occc4</chem>                                                                                                                                                           | 12000    | nM |
| CHEMBL241495  | <chem>CN(C)[C@H]1[C@@H]2C[C@H]3C(=C(O)[C@]2(O)C(=O)C(=C1O)C(=O)NCN4CCN(CC4)c5cc6N(C=C(C(=O)O)C(=O)c6cc5F)C7CC7)C(=O)c8c(O)cccc8[C@@]3(C)O</chem>                                                                                    | 12000    | nM |
| CHEMBL396688  | <chem>CCN1C=C(C(=O)O)C(=O)c2cc(F)c(cc12)N3CCN(CNC(=O)C4=C(O)[C@H]([C@@H]5[C@@H](O)[C@H]6C(=C(O)[C@]5(O)C4=O)C(=O)c7c(O)cccc7[C@@]6(C)O)N(C)C)CC3</chem>                                                                             | 12000    | nM |
| CHEMBL250977  | <chem>Cc1ccc(cc1)n2c(SCC(=O)NNC(=O)c3ccccc3O)mnc2c4ccccc4</chem>                                                                                                                                                                    | 12000    | nM |
| CHEMBL506797  | <chem>CC(C)C(=C)CC[C@@H](C)[C@H]1CC=C2C3=C([C@@H](O)[C@H](OC(=O)C)[C@]12C)[C@@]4(C)C[C@@H](O)[C@H](OC(=O)CCC(=O)O)C(C)(C)[C@@H]4CC3</chem>                                                                                          | 12000    | nM |
| CHEMBL391925  | <chem>CC(C)C(=C)CC[C@@H](C)[C@H]1CC=C2C3=C([C@@H](O)[C@H](OC(=O)C)[C@]12C)[C@@]4(C)C[C@@H](OC(=O)CCC(=O)O)[C@H](O)C(C)(C)[C@@H]4CC3</chem>                                                                                          | 12000    | nM |
| CHEMBL449723  | <chem>Cc1cc2c(SC(=NS2(=O)=O)C(=O)c3ccccc3)cc1Cl</chem>                                                                                                                                                                              | 12000    | nM |
| CHEMBL559410  | <chem>Oc1ccc(\C=C\C(=O)Nc2ccc(cc2)S(=O)(=O)Nc3ccccc3)cc1O</chem>                                                                                                                                                                    | 12000    | nM |
| CHEMBL1223984 | <chem>COc1cc2C(=O)C(=C(C(=O)c2cc1OC)C3=C(C(=O)c4ccccc4C3=O)C5=C(O)C(=O)c6cc(OC)c(OC)cc6C5=O)O</chem>                                                                                                                                | 12000    | nM |
| CHEMBL1270908 | <chem>COc1ccc(\C=C\2/C(=O)N(N=C2C(F)(F)F)c3cc(Cl)cc(Cl)c3)cc1OCc4ccc(F)cc4</chem>                                                                                                                                                   | 12000    | nM |
| CHEMBL1813496 | <chem>Oc1cccc(C(=O)NCc2cccs2)c1O</chem>                                                                                                                                                                                             | 12000    | nM |
| CHEMBL3087788 | <chem>CCOC(=O)C(=O)CC(=O)\C=C\c1cccn1Cc2ccccc2OCC</chem>                                                                                                                                                                            | 12000    | nM |
| CHEMBL3741160 | <chem>COc1ccc(cc1)C2=Cc3ccc(F)cc3C(CC(=O)C)N2c4ccc(O)cc4</chem>                                                                                                                                                                     | 12000    | nM |
| CHEMBL3116307 | <chem>OP(=O)(O)C(Cc1ccc(Cl)c(Cl)c1)P(=O)(O)O</chem>                                                                                                                                                                                 | 12247.45 | nM |
| CHEMBL253137  | <chem>Oc1ccc2CN(Cc3ccccc3)C(=O)c2c1O</chem>                                                                                                                                                                                         | 12300    | nM |
| CHEMBL524869  | <chem>CN1[C@@H](Cc2ccc(Oc3cc4cc(c3O)c5ccc6c(NC(=O)C6(O)C[C@@H](NC(=O)C(=O)c7cc(Cl)c(O)c(Cl)c7)C(=O)N[C@@H](C(=O)N[C@H]4C(=O)N[C@@H](C1=O)c8cc(Cl)c(O)c(Cl)c8)c9cc(Cl)c(O)c(Cl)c9)c5)cc2)C(=O)N[C@@H](C(=O)O)c%10ccc(O)cc%10</chem>  | 12500    | nM |
| CHEMBL524665  | <chem>CN1[C@@H](Cc2ccc(Oc3cc4cc(c3O)c5ccc6C(C[C@@H](NC(=O)C(=O)c7cc(Cl)c(O)c(Cl)c7)C(=O)N[C@@H](C(=O)N[C@H]4C(=O)N[C@H]4C(=O)N[C@@H](C1=O)c8cc(Cl)c(O)c(Cl)c8)c9cc(Cl)c(O)c(Cl)c9)c5)cc2)C(=O)N[C@@H](C(=O)O)c%10ccc(O)cc%10</chem> | 12500    | nM |

|               |                                                                                                                                                                                              |          |    |
|---------------|----------------------------------------------------------------------------------------------------------------------------------------------------------------------------------------------|----------|----|
|               | @ @H](C1=O)c8cc(Cl)c(O)c(Cl)c8)c9cc(Cl)c(O)c(Cl)c9)C(=O)Nc6c5)c<br>c2)C(=O)N[C@ @H](C(=O)O)c% 10ccc(O)cc% 10<br>CO\N=C\c1cc2CCc3c(OC)c4C(=O)c5c(O)c(C)c(O)cc5C(=O)c4c(O)c3c<br>2c(O)c1C(=O)O | 12500    | nM |
| CHEMBL561566  |                                                                                                                                                                                              |          |    |
| CHEMBL510036  | Cc1cc2c(SC(NS2(=O)=O)C(=O)c3ccc(Cl)cc3)cc1Cl                                                                                                                                                 | 12649.11 | nM |
| CHEMBL1213725 | COc1cccc2c1c(cn2Cc3cccc(F)c3Cl)C(=O)\C=C(/O)\C(=O)O                                                                                                                                          | 12740    | nM |
| CHEMBL1224051 | Oc1cc(cc(O)c1O)C(=O)NCCCN2CCN(CC2)C(=O)\C=C\c3cccc3                                                                                                                                          | 12830    | nM |
| CHEMBL456991  | CCOC(=O)\C(=C\C(=O)C1=CN(Cc2ccc(F)cc2)c3c(Cl)cccc3C1=O)\O                                                                                                                                    | 12899.61 | nM |
| CHEMBL226489  | OC(=O)C(=O)CC(=O)c1ccc2cc3cccc3cc2c1                                                                                                                                                         | 13000    | nM |
| CHEMBL241359  | COc1ccc(Nc2nc(NCc3occc3)nc(N\N=C\c4ccc(Br)cc4)n2)cc1                                                                                                                                         | 13000    | nM |
|               | CCN1C=C(C(=O)O)C(=O)c2cc(F)c(cc12)N3CCN(CNC(=O)C4=C(O)[<br>C@H]([C@ @H]5C[C@H]6C(=C(O)[C@ ]5(O)C4=O)C(=O)c7c(O)cccc<br>7[C@ @]6(C)O)N(C)C)CC3                                                | 13000    | nM |
| CHEMBL396907  |                                                                                                                                                                                              |          |    |
| CHEMBL398846  | Oc1ccc2CN(Cc3cccc(CBr)c3)C(=O)c2c1O                                                                                                                                                          | 13000    | nM |
|               | COc1cccc2C(=O)C(=C(C(=O)c12)C3=C(C(=O)c4cccc4C3=O)C5=C(<br>O)C(=O)c6cccc(OC)c6C5=O)O                                                                                                         | 13000    | nM |
| CHEMBL1223982 |                                                                                                                                                                                              |          |    |
|               | OC1=C(C(=O)c2cccc2C1=O)C3=C(C(=O)c4cccc4C3=O)C5=C(O)C(<br>=O)c6cccc6C5=O                                                                                                                     | 13000    | nM |
| CHEMBL1224083 |                                                                                                                                                                                              |          |    |
| CHEMBL1813507 | Oc1cc(cc(C(=O)NCc2occc2)c1O)S(=O)(=O)N3CCCCC3                                                                                                                                                | 13000    | nM |
| CHEMBL2180600 | CS(=O)(=O)Oc1c(nc(Br)c2ccnc12)C(=O)NCc3ccc(F)cc3                                                                                                                                             | 13000    | nM |
| CHEMBL2311867 | COc1cc(Br)cc(\C=N\NC(=O)c2cccn2)c1O                                                                                                                                                          | 13000    | nM |
| CHEMBL3087785 | CCOC(=O)C(=O)CC(=O)\C=C\c1cccn1Cc2cccc(c2)C#N                                                                                                                                                | 13000    | nM |
|               | COc1c2CCc3cc(C(=O)O)c(C(=O)O)c(O)c3c2c(O)c4C(=O)c5cc(O)c(C)<br>c(O)c5C(=O)c14                                                                                                                | 13200    | nM |
| CHEMBL554301  |                                                                                                                                                                                              |          |    |
| CHEMBL34249   | OC(Cc1ccc(Cl)c(Cl)c1)(P(=O)(O)O)P(=O)(O)O                                                                                                                                                    | 13416.41 | nM |
|               | COc1c(N2CCN(CNC(=O)C3=C(O)[C@H]([C@ @H]4[C@ @H](O)[C<br>@H]5C(=C(O)[C@ ]4(O)C3=O)C(=O)c6c(O)cccc6[C@ @]5(C)O)N(C)<br>C)C(C)C2)c(F)cc7C(=O)C(=CN(C8CC8)c17)C(=O)O                             | 13500    | nM |
| CHEMBL392565  |                                                                                                                                                                                              |          |    |
|               | CC1(C)OC(=O)C2([C@H](CC(=O)C[C@H]2c3occc3)c4occc4)C(=O)<br>O1                                                                                                                                | 13700    | nM |
| CHEMBL427703  |                                                                                                                                                                                              |          |    |
| CHEMBL565985  | C[C@H](N1Cc2ccc(O)c(O)c2C1=O)c3cccc4cccc34                                                                                                                                                   | 13899.64 | nM |
| CHEMBL464216  |                                                                                                                                                                                              |          |    |
|               | CN1C(=O)C(=C(O)c2cc(Oc3cccc3)ccc12)C(=O)O                                                                                                                                                    | 14000    | nM |
|               | C[C@H](CCC1(CO1)C(C)(C)O)[C@H]2CC=C3C4=C([C@ @H](O)[C<br>@H](OC(=O)C)[C@ ]23C)[C@ @]5(C)C[C@ @H](OC(=O)CCCCC<br>CCCCCCCCO)[C@H](OS(=O)(=O)O)C(C)(C)[C@ @H]5CC4                               | 14000    | nM |
| CHEMBL501254  |                                                                                                                                                                                              |          |    |
| CHEMBL453267  | Cc1cc(Cl)cc2SC(NS(=O)(=O)c12)C(=O)c3ccc(Cl)cc3                                                                                                                                               | 14000    | nM |
| CHEMBL456030  |                                                                                                                                                                                              |          |    |
|               | Cc1cc(Cl)cc2SC(NS(=O)(=O)c12)C(=O)c3ccc(Cl)c(Cl)c3                                                                                                                                           | 14000    | nM |
|               | COc1ccc(\C=C\2/C(=O)N(N=C2C(=O)O)c3cccc(c3)[N+](=O)[O-<br>)cc1OCc4ccc(F)cc4                                                                                                                  | 14000    | nM |
| CHEMBL1270000 |                                                                                                                                                                                              |          |    |
| CHEMBL1813512 | CC(=O)Nc1cc(O)c(O)c(c1)C(=O)NCc2ccc(F)cc2                                                                                                                                                    | 14000    | nM |
| CHEMBL3582077 | CCOC(=O)\C(=C\C(=O)C1=CN(Cc2ccnc2)c3cccc3C1=O)\O                                                                                                                                             | 14000    | nM |
| CHEMBL2297148 |                                                                                                                                                                                              |          |    |
|               | O=C1NC(=S)SC1NS(=O)(=O)c2ccc(cc2)N=Nc3ncccn3                                                                                                                                                 | 14120    | nM |
| CHEMBL538878  |                                                                                                                                                                                              |          |    |
|               | COc1c2CCc3cc(\C=N\NC(=O)c4cccc4)c(C(=O)O)c(O)c3c2c(O)c5C(=<br>O)c6cc(O)c(C)c(O)c6C(=O)c15                                                                                                    | 14600    | nM |
| CHEMBL48381   |                                                                                                                                                                                              |          |    |
|               | CCOC(=O)C(=O)CC(=O)\C=C\c1cccn1Cc2cccc2                                                                                                                                                      | 15000    | nM |
|               | CC(C)C(=C)CC[C@ @H](C)[C@H]1CC[C@H]2C3=C([C@ @H](O)[C<br>@H](OC(=O)C)[C@ ]12C)[C@ @]4(C)C[C@ @H](O)[C@H](OS(=O)(=<br>O)O)C(C)(C)[C@ @H]4CC3                                                  | 15000    | nM |
| CHEMBL503991  |                                                                                                                                                                                              |          |    |
| CHEMBL462288  | Clc1ccc(cc1Cl)C(=O)C2NS(=O)(=O)c3cccc3S2                                                                                                                                                     | 15000    | nM |
| CHEMBL1269478 | ON1C(=O)C=Cc2ccnc12                                                                                                                                                                          | 15000    | nM |
| CHEMBL1270213 | COc1cc(\C=C\2/C(=O)N(N=C2C(F)(F)F)c3cccc(Br)c3)cc(OC)c1OC                                                                                                                                    | 15000    | nM |
| CHEMBL1813497 | Oc1cccc(C(=O)NCc2occc2)c1O                                                                                                                                                                   | 15000    | nM |
| CHEMBL2311873 | Oc1ccc(Br)cc1\C=N\NC(=O)C2=NNC3CCCCC23                                                                                                                                                       | 15000    | nM |

|               |                                                                                                                                                               |          |    |
|---------------|---------------------------------------------------------------------------------------------------------------------------------------------------------------|----------|----|
| CHEMBL3741987 | <chem>COc1ccc(cc1)C2=Cc3ccc(F)cc3C(CC(=O)CO)N2c4ccc(C)cc4</chem>                                                                                              | 15100    | nM |
| CHEMBL1224124 | <chem>Oc1cccc(\C=C\C(=O)N2CCN(CCCNC(=O)c3cc(O)c(O)c(O)c3)CC2)c1</chem>                                                                                        | 15410    | nM |
| CHEMBL3116305 | <chem>OC(Cc1ccc(Cl)cc1)(P(=O)(O)O)P(=O)(O)O</chem>                                                                                                            | 15874.51 | nM |
| CHEMBL197014  | <chem>CC(C)CN1C(=O)C(=C(O)c2cccc12)C(=O)Nc3cccc3S(=O)(=O)N</chem>                                                                                             | 16000    | nM |
| CHEMBL225682  | <chem>Cc1ccc2Oc3nc(C)c(cc3C(=O)c2c1)C(=O)CC(=O)C(=O)O</chem>                                                                                                  | 16000    | nM |
| CHEMBL240547  | <chem>COc1ccc(cc1)C(=O)Nc2cccc2C(=O)NC(C(C)C)C(=O)NNC(=O)c3ccc<br/>cc3O</chem>                                                                                | 16000    | nM |
| CHEMBL1270602 | <chem>COc1ccc(\C=C\2/C(=O)N(N=C2C(F)(F)F)c3cccc(c3)c4cccc4)cc1OCc<br/>5ccc(F)cc5</chem>                                                                       | 16000    | nM |
| CHEMBL2236602 | <chem>CCOC(=O)\C(=C\C(=O)C1=CN(Cc2cccc(OC)c2)c3cccc3C1=O)\O</chem>                                                                                            | 16000    | nM |
| CHEMBL3582081 | <chem>OC(=O)\C(=C\C(=O)C1=CN(Cc2cnc2)c3cccc3C1=O)\O</chem>                                                                                                    | 16000    | nM |
| CHEMBL526642  | <chem>COCCN1C=C(C(=O)O)C(=O)c2cc(Cc3ccc(Cl)cc3Cl)ccc12</chem>                                                                                                 | 16500    | nM |
| CHEMBL232024  | <chem>Oc1nc(nc(C(=O)NCc2cnc2)c1O)c3cccs3</chem>                                                                                                               | 16595.87 | nM |
| CHEMBL1084126 | <chem>Oc1nc(nc(C(=O)NCn2cnc2)c1O)c3cccs3</chem>                                                                                                               | 16982.44 | nM |
| CHEMBL392160  | <chem>CCN1C(=O)C(=C(O)c2cccc12)C(=O)NNC(=O)c3cccc(c3)[N+](=O)[O<br/>-]</chem>                                                                                 | 17000    | nM |
| CHEMBL239176  | <chem>CN(C)[C@H]1[C@@H]2[C@@H](O)[C@H]3C(=C(O)[C@]2(O)C(=O)C(=C1O)C(=O)NCN4CCN(CC4)c5cc6N(C=C(C(=O)O)C(=O)c6cc5<br/>F)C7CC7)C(=O)c8c(O)cccc8[C@@]3(C)O</chem> | 17000    | nM |
| CHEMBL398970  | <chem>COc1ccc(cc1)n2c(Cc3cccc3)nnc2SCC(=O)NNC(=O)c4cccc4O</chem>                                                                                              | 17000    | nM |
| CHEMBL250779  | <chem>Oc1cccc1C(=O)NNC(=O)CSe2nnc(Cc3cccc3)n2C4CCCC4</chem>                                                                                                   | 17000    | nM |
| CHEMBL456482  | <chem>COc1ccc(cc1)C(=O)C2NS(=O)(=O)c3cc(C)c(Cl)cc3S2</chem>                                                                                                   | 17000    | nM |
| CHEMBL565527  | <chem>C[C@H](N1Cc2ccc(O)c(O)c2C1=O)c3ccc(F)cc3</chem>                                                                                                         | 17182.55 | nM |
| CHEMBL1224052 | <chem>Cc1ccc(\C=C\C(=O)N2CCN(CCCNC(=O)c3cc(O)c(O)c(O)c3)CC2)cc1</chem>                                                                                        | 17470    | nM |
| CHEMBL456031  | <chem>Cc1cc(Cl)cc2SC(NS(=O)(=O)c12)C(=O)c3ccc4cccc4c3</chem>                                                                                                  | 17492.86 | nM |
| CHEMBL3739597 | <chem>COc1ccc(cc1)C2=Cc3ccc(F)cc3C(CC(=O)CO)N2c4ccc(Cl)cc4</chem>                                                                                             | 17900    | nM |
| CHEMBL394650  | <chem>Oc1cccc1C(=O)NNC(=O)COc2ccc3cccc3c2</chem>                                                                                                              | 18000    | nM |
| CHEMBL241804  | <chem>COc1ccc(cc1)C(=O)NNC(=O)c2cc3cccc3cc2O</chem>                                                                                                           | 18000    | nM |
| CHEMBL239177  | <chem>CCN1C=C(C(=O)O)C(=O)c2cc(F)c(N3CCN(CNC(=O)C4=C(O)[C@H]<br/>([C@@H]5C[C@@H]6Cc7c(ccc(O)c7C(=O)C6=C(O)[C@]5(O)C4=O)<br/>N(C)C)N(C)C)C(C)C3)c(F)c12</chem> | 18000    | nM |
| CHEMBL475828  | <chem>OC(=O)\C(=C\C(=O)c1cccc(NC(=O)\C=C\c2ccc(Cl)cc2)c1)\O</chem>                                                                                            | 18000    | nM |
| CHEMBL561848  | <chem>Oc1ccc2CN(Cc3c(F)cccc3Cl)C(=O)c2c1O</chem>                                                                                                              | 18000    | nM |
| CHEMBL1270416 | <chem>NCc1cccc1c2cccc(c2)C3=CC(=O)N(O)c4ncccc34</chem>                                                                                                        | 18000    | nM |
| CHEMBL1813501 | <chem>Oc1cccc(C(=O)NCC2CCCC2)c1O</chem>                                                                                                                       | 18000    | nM |
| CHEMBL1978342 | <chem>OC1=C(C(C2=C(O)c3cccc3OC2=O)c4ccc(cc4)C(=O)c5cccc5)C(=O)<br/>Oc6cccc16</chem>                                                                           | 18000    | nM |
| CHEMBL3125978 | <chem>ON1C(=O)C(=Cc2cccc(O)c12)C(=O)NCc3ccc(F)cc3F</chem>                                                                                                     | 18000    | nM |
| CHEMBL511508  | <chem>OCCN1C=C(C(=O)O)C(=O)c2cc(Sc3cccc3)ccc12</chem>                                                                                                         | 18500    | nM |
| CHEMBL3397849 | <chem>COC1=C(N=C(Cc2cccc2)N(C)C1=O)C(=O)N3CCN(CCCNC(=O)c4cc(O)c(O)c4)CC3</chem>                                                                               | 18600    | nM |
| CHEMBL3397846 | <chem>COC1=C(N=C(Cc2ccc(F)cc2)N(C)C1=O)C(=O)N3CCN(CCCNC(=O)c4cc(O)c(O)c4)CC3</chem>                                                                           | 18900    | nM |
| CHEMBL1269893 | <chem>COc1ccc(\C=C\2/C(=O)N(N=C2C(=O)O)c3cccc(Br)c3)cc1OCc4ccc(F)<br/>cc4</chem>                                                                              | 19000    | nM |
| CHEMBL1270700 | <chem>COc1ccc(\C=C\2/C(=O)N(N=C2C(F)(F)F)c3cccc(c3)[N+](=O)[O-]<br/>]cc1OCc4ccc(F)cc4</chem>                                                                  | 19000    | nM |
| CHEMBL1813509 | <chem>Oc1cc(cc(C(=O)NCC2CCCC2)c1O)S(=O)(=O)N3CCCC3</chem>                                                                                                     | 19000    | nM |
| CHEMBL3087789 | <chem>CCOC(=O)C(=O)CC(=O)\C=C\c1cccn1Cc2cc(C)cc(C)c2</chem>                                                                                                   | 19000    | nM |
| CHEMBL1224122 | <chem>Oc1cc(cc(O)c1O)C(=O)NCCCN2CCN(CC2)C(=O)\C=C\c3cccc3Cl</chem>                                                                                            | 19270    | nM |
| CHEMBL3125968 | <chem>ON1C(=O)C(=Cc2cccc12)C(=O)NCc3ccc(F)cc3F</chem>                                                                                                         | 19700    | nM |
| CHEMBL252551  | <chem>COc1cccc(C(=O)NNC(=O)c2cccc(O)c2O)c1O</chem>                                                                                                            | 19899.75 | nM |
| CHEMBL459074  | <chem>COc1ccc(cc1)C(=O)C2=NS(=O)(=O)c3cc(C)c(Cl)cc3S2</chem>                                                                                                  | 19899.75 | nM |

|               |                                                                                                                      |          |    |
|---------------|----------------------------------------------------------------------------------------------------------------------|----------|----|
| CHEMBL235417  | COc1ccc(OC)c(c1)C(=O)C2=C(O)C(=O)N(CCCCCC(=O)O)C2c3ccc(Cl)cc3                                                        | 20000    | nM |
| CHEMBL239696  | CCN1C(=O)C(=C(O)c2ccccc12)C(=O)NNC(=O)c3ccc(cc3)[N+](=O)[O-]                                                         | 20000    | nM |
| CHEMBL240752  | NC(=O)NN=C1c2cc(ccc2c3ccc(cc13)S(=O)(=O)NCc4occc4)S(=O)(=O)NCc5occc5                                                 | 20000    | nM |
| CHEMBL468656  | CCCC[C@@H](C)C1=C(O)C(=O)[C@@H]2C[C@H](C)C[C@@H](C[C@H]2[C@]1(C)C(=O)CCO)C(=O)O                                      | 20000    | nM |
| CHEMBL512638  | CCCCC[C@@H](C)C1=C(O)C(=O)[C@@H]2[C@H](O)[C@H](C)C[C@H](O)[C@H]2[C@]1(C)C(=O)\C=C/O                                  | 20000    | nM |
| CHEMBL560218  | Oc1ccc2CN(Cc3c(F)cccc3F)C(=O)c2c1O                                                                                   | 20000    | nM |
| CHEMBL554975  | COc1c2CCc3cc4C5SCC(N5C(=O)c4c(O)c3c2c(O)c6C(=O)c7cc(O)c(C)c(O)c7C(=O)c16)C(=O)O                                      | 20000    | nM |
| CHEMBL1813514 | CN(C)Cc1ccc(C(=O)NCc2ccc(F)cc2)c(O)c1O                                                                               | 20000    | nM |
| CHEMBL1214586 | CCOC(=O)C(=C\C(=O)c1cn(Cc2ccc(Cl)c(F)c2)c3ccccc(OC)c13)\OCCOC(=O)c1sc(nc1C)N2C(C(=C(O)C2=O)C(=O)c3ccccc3)c4ccc(F)cc4 | 20350    | nM |
| CHEMBL235847  | 4                                                                                                                    | 21000    | nM |
| CHEMBL438489  | OC1=C(C(N(C1=O)c2nc3ccccc3s2)c4ccc5OCOc5c4)C(=O)c6ccccc6                                                             | 21000    | nM |
| CHEMBL399559  | COc1ccc(cc1OC)c2nnc(SCC(=O)NNC(=O)c3ccccc3O)n2c4ccccc4                                                               | 21000    | nM |
| CHEMBL252161  | Oc1ccc2CN(NS(=O)(=O)c3ccc(F)cc3)C(=O)c2c1O                                                                           | 21000    | nM |
| CHEMBL561164  | Oc1ccc2CN(Cc3ccccc(F)c3)C(=O)c2c1O                                                                                   | 21000    | nM |
| CHEMBL1761473 | CCC1=C(N(COCc2ccc(F)cc2)C(=O)N(O)C1=O)C(=O)c3cc(C)cc(C)c3                                                            | 21000    | nM |
| CHEMBL1813498 | Oc1ccccc(C(=O)NCc2ccc(cc2)c3ccccc3)c1O                                                                               | 21000    | nM |
| CHEMBL430776  | [Na+].COc1ccc(cc1O)c2c3c4cc(OC)c(OS(=O)(=O)[O-])cc4OC(=O)c3n5ccc6cc(OC)c(OC)cc6c25                                   | 22000    | nM |
| CHEMBL254852  | COc1ccccc(C(=O)NNC(=O)c2ccccc(OC)c2O)c1O                                                                             | 22000    | nM |
| CHEMBL505948  | COc1ccc(cc1O)c2c3c4cc(OC)c(OS(=O)(=O)O)cc4OC(=O)c3n5ccc6cc(OC)c(OC)cc6c25                                            | 22000    | nM |
| CHEMBL475819  | OC(=O)\C(=C\C(=O)c1ccccc(NC(=O)\C=C\c2ccc(F)cc2)c1)\O                                                                | 22000    | nM |
| CHEMBL538947  | COc1c2CCc3cc(\C=N\NS(=O)(=O)c4ccc(C)cc4)c(C(=O)O)c(O)c3c2c(O)c5C(=O)c6cc(O)c(C)c(O)c6C(=O)c15                        | 22000    | nM |
| CHEMBL1270308 | Oc1ccc(\C=C\2/C(=O)N(N=C2C(F)(F)F)c3ccccc(Br)c3)cc1OCc4ccc(F)cc4                                                     | 22000    | nM |
| CHEMBL1813513 | Oc1cc(cc(C(=O)NCc2ccc(F)cc2)c1O)C#N                                                                                  | 22000    | nM |
| CHEMBL3741049 | COc1ccc(cc1)C2=Cc3ccc(F)cc3C(CC(=O)CO)N2c4ccc(O)cc4                                                                  | 22100    | nM |
| CHEMBL3740456 | COc1ccc(cc1)C2=Cc3ccc(F)cc3C(CC(=O)C(C)O)N2c4ccc(cc4)C#N                                                             | 22200    | nM |
| CHEMBL3397848 | COC1=C(N=C(Cc2ccc(Cl)c(Cl)c2)N(C)C1=O)C(=O)N3CCN(CCCNC(=O)c4cc(O)c(O)c(O)c4)CC3                                      | 22400    | nM |
| CHEMBL428588  | Oc1ccccc(C(=O)NNC(=O)c2cc3ccccc3cc2O)c1O                                                                             | 22627.42 | nM |
| CHEMBL389881  | OC(=O)C(=O)CC(=O)c1ccc(cc1)N2CCOCC2                                                                                  | 23000    | nM |
| CHEMBL445242  | CC1=CC(=C(C(=O)\C=C\c2ccc(Br)s2)C(=O)O1)O                                                                            | 23000    | nM |
| CHEMBL586817  | Oc1ccc2CN(C3Cc4ccccc4C3)C(=O)c2c1O                                                                                   | 23000    | nM |
| CHEMBL1813386 | Oc1ccccc(C(=O)NCc2ccc(F)c(F)c2)c1O                                                                                   | 23000    | nM |
| CHEMBL3087787 | CCOC(=O)C(=O)CC(=O)\C=C\c1cccn1Cc2ccccc2OC                                                                           | 23000    | nM |
| CHEMBL563525  | C[C@@H](CO)N1C=C(C(=O)O)C(=O)c2cc(Cc3ccccc(Cl)c3F)ccc12                                                              | 23808.4  | nM |
| CHEMBL145     | OC(=O)\C=C\c1ccc(O)c(O)c1                                                                                            | 24000    | nM |
| CHEMBL1270501 | COc1ccc(\C=C\2/C(=O)N(N=C2C(F)(F)F)c3ccccc(c3)C(F)(F)F)cc1OCc4ccc(F)cc4                                              | 24000    | nM |
| CHEMBL1270611 | NCc1ccc(cc1)c2ccc(CC3=CC(=O)N(O)c4ncccc34)cc2                                                                        | 24000    | nM |
| CHEMBL1813493 | Oc1ccccc(C(=O)NCc2ccc3[nH]ccc3c2)c1O                                                                                 | 24000    | nM |
| CHEMBL497505  | CN(C)CCN1C=C(C(=O)O)C(=O)c2cc(Cc3ccc(Cl)cc3Cl)ccc12                                                                  | 24100    | nM |
| CHEMBL568462  | C[C@H](C1CCc2ccccc12)N3Cc4ccc(O)c(O)c4C3=O                                                                           | 24372.12 | nM |
| CHEMBL1224053 | Oc1cc(cc(O)c1O)C(=O)NCCCN2CCN(CC2)C(=O)\C=C\c3ccc(Cl)cc3                                                             | 24940    | nM |

|               |                                                                                                                                |          |    |
|---------------|--------------------------------------------------------------------------------------------------------------------------------|----------|----|
| CHEMBL240543  | Oc1ccc(C(=O)CSc2nnc([nH]2)c3ccncc3)c(O)c1                                                                                      | 25000    | nM |
| CHEMBL456475  | Cc1cc(Cl)cc2SC(=NS(=O)(=O)c12)C(=O)c3ccc(Cl)cc3                                                                                | 25000    | nM |
| CHEMBL456476  | Cc1cc(Cl)cc2SC(=NS(=O)(=O)c12)C(=O)c3ccc(Cl)c(Cl)c3                                                                            | 25000    | nM |
| CHEMBL565197  | Oc1ccc2CN(Cc3c(F)ccc(F)c3F)C(=O)c2c1O                                                                                          | 25000    | nM |
| CHEMBL554974  | Oc1ccc2CN(Cc3ccccc3F)C(=O)c2c1O<br>COc1ccc(\C=C\2/C(=O)N(N=C2C(F)(F)F)c3ccc(Br)cc3)cc1OCc4ccc(F)                               | 25000    | nM |
| CHEMBL1270909 | cc4                                                                                                                            | 25000    | nM |
| CHEMBL1761472 | CCC1=C(N(COCc2ccc(F)cc2)C(=O)N(O)C1=O)C(=O)c3ccccc3                                                                            | 25000    | nM |
| CHEMBL492335  | OC(=O)\C(=C\C(=O)C1=CNc2cc(Cl)ccc2C1=O)\O<br>CCOC(=O)\C(=C\C(=O)C1=CN(Cc2ccc(F)c(Cl)c2)c3c(Cl)cccc3C1=O)                       | 25079.87 | nM |
| CHEMBL3582054 | \O                                                                                                                             | 25080    | nM |
| CHEMBL3741857 | COc1ccc(cc1)C2=Cc3ccc(F)cc3C(CC(=O)C(C)O)N2c4ccc(O)cc4<br>COc1ccc(cc1OC)C2N(C(=O)C(=C2C(=O)c3ccc(Br)cc3)O)c4cccc(c4)C          | 25200    | nM |
| CHEMBL235418  | (F)(F)F                                                                                                                        | 26000    | nM |
| CHEMBL391411  | Oc1ccc(\C=N\NC(=O)c2ccccc2O)cc1O                                                                                               | 26000    | nM |
| CHEMBL516404  | OC(=O)\C(=C\C(=O)c1ccccc(NC(=O)\C=C\c2ccc(O)cc2)c1)\O                                                                          | 26000    | nM |
| CHEMBL1813385 | Oc1ccccc(C(=O)NCc2ccccc3ccccc23)c1O                                                                                            | 26000    | nM |
| CHEMBL3415851 | OC(=O)\C(=C\C(=O)\C=C\c1ccn(Cc2ccc(F)cc2)c1)\O                                                                                 | 26000    | nM |
| CHEMBL226433  | COC(=O)C(=O)CC(=O)c1ccc(c2ccccc2C(=O)OC)c(c1)[N+](=O)[O-]                                                                      | 27000    | nM |
| CHEMBL251378  | Cc1cc(C)nc(SCc2nnc(SCC(=O)NNC(=O)c3ccccc3O)n2c4cccc4)n1                                                                        | 27000    | nM |
| CHEMBL512205  | ONC(=O)c1cc(on1)c2cccc(OCc3ccccc3)c2                                                                                           | 27000    | nM |
| CHEMBL561565  | Oc1ccc2CN(Cc3cc(F)ccc3F)C(=O)c2c1O<br>COc1ccc(\C=C\2/C(=O)N(N=C2C(F)(F)F)c3nc4ccccc4s3)cc1OCc5ccc(F)                           | 27000    | nM |
| CHEMBL1271215 | F)cc5                                                                                                                          | 27000    | nM |
| CHEMBL241598  | OC1=C(C(=O)NNC(=O)c2ccccc2)C(=O)Nc3ccccc13                                                                                     | 28000    | nM |
| CHEMBL252831  | Oc1ccc2CN(CCc3ccccc3)C(=O)c2c1O                                                                                                | 28000    | nM |
| CHEMBL458229  | Cc1cc2c(SC(NS2(=O)=O)C(=O)c3ccccc3)[N+](=O)[O-])cc1Cl                                                                          | 28000    | nM |
| CHEMBL576828  | Oc1ccc2C(=O)N([C@H]3CCc4ccccc34)C(=O)c2c1O<br>COc1cc(cc(\C=N\Nc2nc(Nc3ccccc3)nc(Nc4ccccc4)n2)c1O)[N+](=O)[O-]                  | 28460.5  | nM |
| CHEMBL391519  | -]                                                                                                                             | 29000    | nM |
| CHEMBL518799  | Cc1cc(c(S)cc1Cl)S(=O)(=O)NC2=Nc3ccsc3C(=O)N2Cc4ccccc4                                                                          | 29000    | nM |
| CHEMBL430168  | CCOc1ccc(cc1)C(=O)C2=C(O)C(=O)N(C2c3ccc(O)c(OC)c3)c4nccs4                                                                      | 30000    | nM |
| CHEMBL239482  | CCN1C(=O)C(=C(O)c2ccccc12)C(=O)NNC(=O)c3ccccc3[N+](=O)[O-]                                                                     | 30000    | nM |
| CHEMBL395448  | OC1=C(C(=O)NNC(=O)c2ccccc2F)C(=O)Nc3ccccc13                                                                                    | 30000    | nM |
| CHEMBL506796  | COc1ccc(\C=C\C(=O)Nc2cccc(c2)C(=O)\C=C(/O)\C(=O)O)cc1                                                                          | 30000    | nM |
| CHEMBL510455  | Cc1cc2c(SC(NS2(=O)=O)C(=O)c3ccc4ccccc4c3)cc1Cl                                                                                 | 30000    | nM |
| CHEMBL513773  | Cc1cc2c(SC(=NS2(=O)=O)C(=O)c3ccc(Br)cc3)cc1Cl<br>COc1ccc(\C=C\2/C(=O)N(N=C2C(F)(F)F)c3ccc(Br)cc3)cc1OCc4cccc(Cl)c4F            | 30000    | nM |
| CHEMBL1270214 | COc1ccc(\C=C\2/C(=O)N(N=C2C(F)(F)F)c3ccc(Cl)c3)cc1OCc4ccc(F)                                                                   | 30000    | nM |
| CHEMBL1270805 | cc4                                                                                                                            | 30000    | nM |
| CHEMBL399560  | Oc1ccccc1C(=O)NNC(=O)CSc2nnc(c3ccncc3)n2c4ccc(F)cc4                                                                            | 31000    | nM |
| CHEMBL399480  | Oc1ccccc(C(=O)NCCCNC(=O)c2ccc(O)c2O)c1O                                                                                        | 31000    | nM |
| CHEMBL462344  | Cc1cc(c(S)cc1Cl)S(=O)(=O)NC2=Nc3ccsc3C(=O)N2Cc4ccccc4                                                                          | 31000    | nM |
| CHEMBL2094513 | Oc1ccc(\C=N\N2CCN(CC2)c3ccccc3)cc1O                                                                                            | 31000    | nM |
| CHEMBL2180601 | Cc1ccc(cc1)S(=O)(=O)Oc2c(nc(Br)c3ccncc3)C(=O)NCc4ccc(F)cc4<br>Oc1cc(cc(O)c1O)C(=O)NCCCN2CCN(CC2)C(=O)\C=C\c3ccccc3[N+](=O)[O-] | 31000    | nM |
| CHEMBL1224123 | =O)[O-]                                                                                                                        | 31310    | nM |
| CHEMBL241606  | OC(=O)c1ccccc1NC(=O)c2ccc(cc2)C(=O)Nc3ccccc3C(=O)O                                                                             | 32000    | nM |
| CHEMBL1928169 | Cc1c(nnn1Cc2cccc(F)c2)C(=O)\C=C(/O)\c3ccc(O)c(O)c3                                                                             | 32000    | nM |
| CHEMBL3087791 | CCOC(=O)C(=O)CC(=O)\C=C\c1cccn1Cc2ccccc2C                                                                                      | 32000    | nM |
| CHEMBL3582049 | CCOC(=O)\C(=C\C(=O)C1=CN(Cc2c(Cl)cccc2Cl)c3ccccc3C1=O)\O                                                                       | 32000    | nM |

|               |                                                                                           |          |    |
|---------------|-------------------------------------------------------------------------------------------|----------|----|
| CHEMBL3582076 | CCOC(=O)\C(=C\C(=O)C1=CN(Cc2ccc3ccccc3c2)c4ccccc4C1=O)\O                                  | 32000    | nM |
| CHEMBL235848  | CCOC(=O)c1sc(nc1C)N2C(C(=C(O)C2=O)C(=O)c3ccc(C)cc3)c4ccc(F)                               | 33000    | nM |
| CHEMBL240329  | cc4<br>COc1cccc(c1)C(=O)NNC(=O)c2ccc3ccccc3c2O                                            | 33000    | nM |
| CHEMBL400246  | Oc1ccc2CN(N(S(=O)(=O)c3ccc(F)cc3)S(=O)(=O)c4ccc(F)cc4)C(=O)c2                             | 33000    | nM |
| CHEMBL471327  | c1O<br>Cc1cc(c(SCc2ccccc2)cc1Cl)S(=O)(=O)NC3=Nc4cc(Cl)ccc4C(=O)N3                         | 33000    | nM |
| CHEMBL1237046 | CN(C)[C@H]1[C@@H]2C[C@H]3C(=C(O)[C@]2(O)C(=O)C(=C1O)                                      | 34000    | nM |
| CHEMBL1270106 | C(=O)NCN4CCCC4)C(=O)c5c(O)cccc5[C@@]3(C)O                                                 | 34000    | nM |
| CHEMBL1813511 | COc1ccc(\C=C\2/C(=O)N(N=C2C(F)(F)F)c3ccccc(Br)c3)cc1OC                                    | 34000    | nM |
| CHEMBL254646  | CS(=O)(=O)Nc1cc(O)c(O)c(c1)C(=O)NCc2ccc(F)cc2                                             | 34985.71 | nM |
| CHEMBL389931  | COc1cccc(\C=N\NC(=O)c2cccc(O)c2O)c1OC                                                     | 35000    | nM |
| CHEMBL252553  | Cc1nc2Oc3ccccc3C(=O)c2cc1C(=O)CC(=O)C(=O)O                                                | 35000    | nM |
| CHEMBL462561  | Oc1cccc(C(=O)NCc2ccc(F)cc2)c1O                                                            | 35000    | nM |
| CHEMBL1270806 | Cc1cc(c(S)cc1Cl)S(=O)(=O)NC2=Nc3cc(sc3C(=O)N2N)C(C)(C)C                                   | 35000    | nM |
| CHEMBL264109  | COc1ccc(\C=C\2/C(=O)N(N=C2C(F)(F)F)c3ccccc(I)c3)cc1OCc4ccc(F)c                            | 35000    | nM |
| CHEMBL240334  | c4<br>CCOC(=O)C1=C(O)CCC2([C@H]1c3occcc3)C(=O)OC(C)(C)OC2=O                               | 35700    | nM |
| CHEMBL479537  | Oc1ccc(C(=O)N\N=C/2\C(=O)Nc3ccccc23)c(O)c1                                                | 36000    | nM |
| CHEMBL247961  | Clc1cc(SCc2ccccc2)c(cc1C(=O)Nc3ccccc3)S(=O)(=O)NC4=Nc5ccccc5                              | 36000    | nM |
| CHEMBL240513  | C(=O)N4<br>COc1ccc(cc1)[C@@H]2CC(=O)C[C@H](c3occcc3)C24C(=O)OC(C)(C)                      | 36000    | nM |
| CHEMBL552987  | )OC4=O<br>CNe1nc(N\N=C\c2oc(cc2)c3ccc(cc3OC)[N+](=O)[O-                                   | 36300    | nM |
| CHEMBL1761471 | ]nc(Nc4ccccc4)n1<br>COc1c2CCc3cc(\C=N\NC45CC6CC(CC(C6)C4)C5)c(C(=O)O)c(O)c3c2c            | 37000    | nM |
| CHEMBL182653  | (O)c7C(=O)c8cc(O)c(C)c(O)c8C(=O)c17                                                       | 37000    | nM |
| CHEMBL235639  | CCC1=C(N(COCc2ccccc2)C(=O)N(O)C1=O)C(=O)c3ccccc3                                          | 37000    | nM |
| CHEMBL518478  | COc1ccc(\C=C\C(=O)c2ccc(O)cc2O)cc1                                                        | 39000    | nM |
| CHEMBL490818  | Cc1ccc(cc1)C(=O)C2=C(O)C(=O)N(C2c3ccc(Cl)cc3)c4nccs4                                      | 39000    | nM |
| CHEMBL1813515 | Cc1cc(c(S)cc1Cl)S(=O)(=O)NC2=Nc3sc(C)c(C)c3C(=O)N2N                                       | 39000    | nM |
| CHEMBL131063  | COc1ccc(\C=C\C(=O)C2=C(O)C=C(C)OC2=O)cc1                                                  | 39000    | nM |
| CHEMBL468459  | CN(C)Cc1ccc(C(=O)NCc2occc2)c(O)c1O                                                        | 39810    | nM |
| CHEMBL538879  | CC(C)Cn1ennc1NS(=O)(=O)c2cc(C(=O)Nc3ccc(Cl)cc3)c(Cl)cc2S                                  | 40000    | nM |
| CHEMBL1270307 | CC(C)C(=C)CC[C@@H](C)[C@H]1CC(=O)C2=C3CC[C@H]4C(C)(C                                      | 40000    | nM |
| CHEMBL1909979 | )C[C@@H](O)[C@H](O)C[C@]4(C)C3=C[C@H](OC(=O)C)[C@]12C                                     | 40000    | nM |
| CHEMBL1928166 | COc1c2CCc3cc(C4NCc5ccccc5N4)c(C(=O)O)c(O)c3c2c(O)c6C(=O)c7                                | 40000    | nM |
| CHEMBL253609  | cc(O)c(C)c(O)c7C(=O)c16<br>COc1ccc(\C=C\2/C(=O)N(N=C2C(F)(F)F)c3ccccc(Br)c3)cc1OCc4ccc(F) | 40000    | nM |
| CHEMBL513386  | cc4<br>COc1ccc(CCN2C(C(=C(O)C2=O)C(=O)c3ccccc3)c4ccccc(Cl)c4)cc1                          | 40000    | nM |
| CHEMBL475853  | Cc1c(nnn1Cc2ccc(F)cc2)C(=O)\C=C(/O)\c3ccc(O)c(O)c3                                        | 40000    | nM |
| CHEMBL1271008 | Oc1ccc2CN(N3Cc4ccc(O)c(O)c4C3=O)C(=O)c2c1O                                                | 41000    | nM |
| CHEMBL1761474 | CCCCCC[C@H]1OC(=O)C2=C1[C@@H](O)[C@@H]3O[C@@H]3[C@@H]2O                                   | 41000    | nM |
| CHEMBL417356  | OC(=O)\C(=C\C(=O)c1cccc(NC(=O)c2ccccc2O)c1)\O                                             | 41000    | nM |
| CHEMBL392358  | COc1ccc(\C=C\2/C(=O)N(N=C2C(F)(F)F)c3ccc(cc3)C(=O)O)cc1OCc4                               | 41000    | nM |
| CHEMBL518513  | ccc(F)cc4<br>CCC1=C(N(COCc2ccccc2)C(=O)N(O)C1=O)C(=O)c3cc(C)cc(C)c3                       | 41000    | nM |
| CHEMBL475661  | CCOC(=O)C(=O)CC(=O)\C=C\c1cccn1Cc2ccc(Cl)cc2                                              | 42000    | nM |
|               | COc1ccc(cc1OC)C(=O)C2=C(O)C(=O)N(CCc3ccccc3)C2c4ccc(Br)cc4                                | 42000    | nM |
|               | Cc1cc(c(S)cc1Cl)S(=O)(=O)NC2=Nc3ccccc3C(=O)N2Cc4occc4                                     | 42000    | nM |
|               | COc1cc(\C=C\C(=O)Nc2cccc(c2)C(=O)\C=C(/O)\C(=O)O)ccc1O                                    | 42000    | nM |



|               |                                                                                                                                                          |          |    |
|---------------|----------------------------------------------------------------------------------------------------------------------------------------------------------|----------|----|
| CHEMBL1813127 | CCOC(=O)CC(=O)Nc1ccc2cccc(O)c2n1                                                                                                                         | 42000    | nM |
| CHEMBL2297146 | Cc1cc2c(SC(=NS2(=O)=O)C(=O)c3ccc(F)cc3)cc1Cl<br>COc1ccc(cc1OC)C2N(C(=O)C(=C2C(=O)c3ccc(Br)cc3)O)c4cc(on4)C(C)(C)C                                        | 42000    | nM |
| CHEMBL235637  | CC(C)(C)c1ccc(cc1)C2N(C(=O)C(=C2C(=O)c3ccc(F)cc3)O)c4nncs4                                                                                               | 43000    | nM |
| CHEMBL392359  | Nc1ccc(cc1)C(=O)CC(=O)Nc2cc(cc(c2)C(=O)O)C(=O)O                                                                                                          | 43000    | nM |
| CHEMBL240299  | Cc1cc(c(S)cc1Cl)S(=O)(=O)NC2=Nc3ccsc3C(=O)N2N                                                                                                            | 43000    | nM |
| CHEMBL459879  | CCN1C=C(C(=O)O)C(=O)c2cc(F)c(N3CCN(CNC(=O)C4=C(O)[C@H]([C@@H]5C[C@H]6C(=C(O)[C@]5(O)C4=O)C(=O)c7c(O)cccc7[C@@]6(C)O)N(C)C)C(C)C3)c(F)c12                 | 44000    | nM |
| CHEMBL396686  | CNS(=O)(=O)c1cc(O)c(O)c(c1)C(=O)NCc2ccc(F)cc2                                                                                                            | 44000    | nM |
| CHEMBL1813505 | Oc1cc(cc(C(=O)NCc2cccs2)c1O)S(=O)(=O)N3CCCCC3                                                                                                            | 44000    | nM |
| CHEMBL1813510 | OC1=C(C(N(C1=O)c2ccccc2)c3ccc(cc3)[N+](=O)[O-])C(=O)c4cccc4                                                                                              | 44000    | nM |
| CHEMBL1909981 | COc1cccc([C@@H]2CC(=O)C[C@H](c3occc3)C24C(=O)OC(C)(C)OC4=O)c1OC                                                                                          | 44000    | nM |
| CHEMBL394249  | CN[C@@H](Cc1ccc(Oc2cc3cc(c2O)c4cccc5c(C[C@@H](N)C(=O)N[C@@H](C(=O)N[C@H]3C(=O)N[C@@H](C(=O)O)c6cc(Cl)c(O)c(Cl)c6)c7cc(Cl)c(O)c(Cl)c7)c[nH]c45)cc1)C(=O)O | 44200    | nM |
| CHEMBL505739  | COc1ccc(CCN2C(C(=C(O)C2=O)C(=O)c3ccccc3)c4ccccc4)cc1                                                                                                     | 45000    | nM |
| CHEMBL1909980 | OC1=C(C(=O)NNC(=O)c2ccccc2[N+](=O)[O-])C(=O)Nc3ccccc13                                                                                                   | 45000    | nM |
| CHEMBL241596  | Oc1ccc(C(=O)\C=C\c2ccccc2O)c(O)c1                                                                                                                        | 46000    | nM |
| CHEMBL148472  | CCCN1C(=O)C(=C(O)c2ccccc12)C(=O)NNC(=O)CC(=O)OCC                                                                                                         | 47000    | nM |
| CHEMBL240330  | Cc1cccc(C(=O)Nc2ccc(c2)C(=O)\C=C(/O)\C(=O)O)c1O                                                                                                          | 48000    | nM |
| CHEMBL474027  | [O-][N+](=O)c1ccc2N(C3=NC(=O)NC(=O)C3=Cc2c1)c4ccc(Cl)cc4                                                                                                 | 48000    | nM |
| CHEMBL239274  | Oc1cccc(C(=O)NCCNC(=O)c2ccc(O)c2O)c1O                                                                                                                    | 49000    | nM |
| CHEMBL399272  | Cc1cc2c(SC(=NS2(=O)=O)C(=O)c3cccc(c3)[N+](=O)[O-])cc1Cl                                                                                                  | 50000    | nM |
| CHEMBL457777  | Oc1ccc(cc1O)C(=O)Nc2ccc(cc2)S(=O)(=O)Nc3ccccc3                                                                                                           | 50000    | nM |
| CHEMBL559409  | CCOC(=O)CC(=O)Nc1ccc(C)cc1                                                                                                                               | 50000    | nM |
| CHEMBL1456957 | Oc1nc(nc(C(=O)NCc2ccc(cc2)c3ccccc3)c1O)c4cccs4                                                                                                           | 50118.72 | nM |
| CHEMBL398210  | Oc1nc(nc(C(=O)NCn2cnnc2)c1O)c3cccs3                                                                                                                      | 50118.72 | nM |
| CHEMBL1085426 | Clc1ccc(NC(=O)c2cc(c(SCc3ccccc3)cc2Cl)S(=O)(=O)NC4=Nc5ccccc5C(=O)N4)cc1                                                                                  | 52000    | nM |
| CHEMBL479348  | Cc1sc2nnc(N\N=C\c3c(O)ccc4ccccc34)c2c1C                                                                                                                  | 52000    | nM |
| CHEMBL2311887 | CC(C)CN1C2C(N=C1N\N=C\c3cc(Br)ccc3O)N(C)C(=O)NC2=O                                                                                                       | 53000    | nM |
| CHEMBL241396  | Oc1ccc2CN(N3C(=O)c4ccc(F)cc4C3=O)C(=O)c2c1O                                                                                                              | 53000    | nM |
| CHEMBL404420  | Cc1cc(c(S)cc1Cl)S(=O)(=O)NC2=Nc3ccsc3C(=O)N2N                                                                                                            | 53000    | nM |
| CHEMBL516661  | Cc1cc(c(S)cc1Cl)S(=O)(=O)NC2=Nc3ccsc3C(=O)N2Cc4occc4                                                                                                     | 53000    | nM |
| CHEMBL460943  | Oc1cccc(\C=N\N2Cc3ccc(O)c(O)c3C2=O)c1O                                                                                                                   | 54000    | nM |
| CHEMBL253395  | COc1ccc(\C=C\C(=O)c2cc(Br)cc(C(=O)O)c2O)cc1OC3CCCC3                                                                                                      | 55000    | nM |
| CHEMBL1682052 | OC(=O)\C(=C\C(=O)c1cccc(NC(=O)Cc2ccccc2)c1)\O                                                                                                            | 56000    | nM |
| CHEMBL500308  | OC(=O)\C(=C\C(=O)C1=CNc2ccc(Cl)cc2C1=O)\O                                                                                                                | 56000    | nM |
| CHEMBL497314  | COc1c2CCc3cc4C5NCCCN5C(=O)c4c(O)c3c2c(O)c6C(=O)c7cc(O)c(C)c(O)c7C(=O)c16                                                                                 | 56000    | nM |
| CHEMBL549679  | CNC(=O)Cc1cccc1CNC(=O)c2cccc(O)c2O                                                                                                                       | 56000    | nM |
| CHEMBL1813502 | Oc1cccc1C(=O)N\N=C\2/C(=O)Nc3ccccc23                                                                                                                     | 57000    | nM |
| CHEMBL394683  | OC(=O)\C(=C\C(=O)c1cccc(NC(=O)c2ccc(Cl)c2)c1)\O                                                                                                          | 57000    | nM |
| CHEMBL510239  | COc1ccc(\C=C/2/C(=NN(C2=O)c3ccccc(Br)c3)COC(=O)C)cc1OCc4ccc(F)cc4                                                                                        | 57000    | nM |
| CHEMBL1271426 | CCCC1=Nc2ccccc2C(=O)N1NC(=O)C3=C(O)c4ccccc5CCCN(C3=O)c45                                                                                                 | 57000    | nM |
| CHEMBL240546  | Cn1c(SCC(=O)NNC(=O)c2ccccc2O)nnc1c3ccccc3                                                                                                                | 58000    | nM |
| CHEMBL251172  | Oc1cccc(C(=O)Nc2ccc3[nH]ccc3c2)c1O                                                                                                                       | 58000    | nM |
| CHEMBL1813495 |                                                                                                                                                          | 58000    | nM |

|               |                                                               |       |    |
|---------------|---------------------------------------------------------------|-------|----|
| CHEMBL498504  | CCN1C=C(C(=O)O)C(=O)C2=C1C(=O)C=CC2=O                         | 58700 | nM |
| CHEMBL399006  | Oc1cccc1C(=O)NNC(=O)CSC2=NC3cccc3C(=O)N2CC4CCCO4              | 60000 | nM |
| CHEMBL239244  | CCCOc1ccc(\C=N\NC2=NC(CC(=N2)c3cccc3)c4cccc4O)c(O)c1          | 60000 | nM |
| CHEMBL1270701 | COc1ccc(\C=C\2/C(=O)N(N=C2C(F)(F)F)c3cccc(F)c3)cc1OCc4ccc(F)c | 60000 | nM |
| CHEMBL398558  | c4                                                            | 60000 | nM |
| CHEMBL3706873 | Oc1ccc(C(=O)NNC(=O)CSc2nnnn2c3cccc3)c(O)c1                    | 61000 | nM |
| CHEMBL226374  | O=C1Nc2ccc(cc2c3cccc13)N(Cc4ccc(cc4)C#N)Cc5ccc(cc5)C#N        | 62000 | nM |
| CHEMBL457554  | OC(=O)C(=O)CC(=O)c1ccc2c(NC(=O)c3cccc23)c1                    | 65000 | nM |
| CHEMBL239056  | Cc1cc2c(SC(=NS2(=O)=O)C(=O)c3ccc(Cl)cc3)cc1Cl                 | 65000 | nM |
| CHEMBL237537  | CCCN1C(=O)C(=C(O)c2cccc12)C(=O)NNC(=O)c3cccc3                 | 66000 | nM |
| CHEMBL458494  | Cc1ccc(cc1)C(=O)C2=C(O)C(=O)N(CCCn3ccnc3)C2c4ccc(Cl)cc4       | 67000 | nM |
| CHEMBL1086442 | OC(=O)c1cc(on1)c2cccc(OCc3cccc3)c2                            | 68000 | nM |
| CHEMBL235200  | CC(C)C[C@H](N)C(=O)N[C@@H](CCC(=O)N)C(=O)N[C@H](CC            | 68000 | nM |
| CHEMBL474862  | C(=O)N)C(=O)N[C@@H](CC(C)C)C(=O)N[C@H](CC(C)C)C(=O)           | 69000 | nM |
| CHEMBL1271007 | N[C@H](Cc1cccc1)C(=O)O                                        | 69000 | nM |
| CHEMBL2180593 | Cc1ccc(cc1)C2N(CC(=O)O)C(=O)C(=C2C(=O)c3ccc(Cl)cc3)O          | 69000 | nM |
| CHEMBL496412  | COc1cccc(c1)C(=O)Nc2cccc(c2)C(=O)\C=C(/O)\C(=O)O              | 69160 | nM |
| CHEMBL239484  | COc1ccc(\C=C\2/C(=O)N(N=C2C(F)(F)F)c3ccc(I)cc3)cc1OCc4ccc(F)c | 70000 | nM |
| CHEMBL391423  | c4                                                            | 70000 | nM |
| CHEMBL471330  | OCCNc1c(nc(Br)c2ccnc12)C(=O)NCc3ccc(F)cc3                     | 70000 | nM |
| CHEMBL572179  | OC(=O)c1ccc(cc1O)c2oc(C=C3C(=O)NC(=S)NC3=O)cc2                | 70000 | nM |
| CHEMBL239483  | O\C(=C/C(=O)c1ccc(Cl)cc1)\C(=O)Nc2nccs2                       | 70000 | nM |
| CHEMBL474861  | COc1ccc(NC(=O)c2cccc(c2)S(=O)(=O)Nc3ccc(cc3)C(=O)O)cc1        | 70000 | nM |
| CHEMBL2311881 | Cc1cc(c(SCc2cccc2)cc1Cl)S(=O)(=O)NC3=NC4ccsc4C(=O)N3          | 70000 | nM |
| CHEMBL240331  | C[C@H](N1Cc2ccc(O)c(O)c2C1=O)c3cccc3                          | 70000 | nM |
| CHEMBL479347  | Cc1cc(C)cc(OCC(=O)NNC(=O)C2=Cc3cccc3OC2=O)c1                  | 72000 | nM |
| CHEMBL225669  | COc1cccc1C(=O)Nc2cccc(c2)C(=O)\C=C(/O)\C(=O)O                 | 73000 | nM |
| CHEMBL235846  | Cc1occc1C(=O)NN\C=C/2\C(=O)N(C(=O)c3cccc23)c4cccc4Cl          | 75000 | nM |
| CHEMBL513058  | Oc1ccc(cc1O)C(=O)CSc2nc(O)c3cccc3n2                           | 77000 | nM |
| CHEMBL2407289 | Cc1ccc(NC(=O)c2cc(c(SCc3cccc3)cc2Cl)S(=O)(=O)NC4=NC5cccc5     | 77000 | nM |
| CHEMBL241183  | C(=O)N4)cc1                                                   | 77000 | nM |
| CHEMBL2311882 | Brc1ccc2NC(=O)c3cccc3c2c1                                     | 78000 | nM |
| CHEMBL240542  | Cc1ccc(cc1)C(=O)C2=C(O)C(=O)N(C2c3ccc(F)cc3)c4nccs4           | 78000 | nM |
| CHEMBL459878  | Cc1cc(c(SCc2cccc2)cc1Cl)S(=O)(=O)NC3=NC4ccsc4C(=O)N3          | 78000 | nM |
| CHEMBL501858  | Fe1ccc(CNC(=O)C2C(=O)NC(=O)c3cccc23)cc1                       | 79000 | nM |
| CHEMBL455820  | CCCN1c(N\N=C\c2cc(Br)ccc2O)nc3N(C)C(=O)NC(=O)c13              | 80000 | nM |
| CHEMBL429082  | COCCN1C(=S)NC(=O)\C(=C\NNC(=O)c2cc(Cl)ccc2O)\C1=O             | 80000 | nM |
| CHEMBL240333  | CCOc1cc(Br)cc(\C=N\c2ncccc2O)c1O                              | 81000 | nM |
| CHEMBL513057  | Cc1cc(c(S)cc1Cl)S(=O)(=O)NC2=NC3sc(C)c3C(=O)N2N               | 81000 | nM |
| CHEMBL240511  | OC(=O)\C(=C\C(=O)c1cccc(NC(=O)c2ccc(O)cc2)c1)\O               | 81000 | nM |
| CHEMBL577062  | OC(=O)c1onc(c1)c2cccc(OCc3cccc3)c2                            | 81000 | nM |
| CHEMBL240548  | OC1=C(C(N(C1=O)c2nc3cccc3s2)c4cccn4)C(=O)c5ccc(Cl)cc5         | 83000 | nM |
| CHEMBL452658  | Oc1ccc(cc1O)c2csc(Nc3nccn3)n2                                 | 83000 | nM |
| CHEMBL1813382 | Cc1cc(c(SCc2cccc2)cc1Cl)S(=O)(=O)NC3=NC4cccc4C(=O)N3          | 83000 | nM |
| CHEMBL577062  | Cc1ccc(NC(=O)CN2C(=O)\C(=N/NC(=O)c3ccc4cccc4n3)\c5cccc25)     | 84000 | nM |
| CHEMBL240548  | cc1                                                           | 84000 | nM |
| CHEMBL452658  | ONC(=O)c1cc2ccn(Cc3ccc(F)cc3F)c2cn1                           | 84000 | nM |
| CHEMBL1813382 | CC(C)Cc1c(C#N)c(SCC(=O)c2ccc(O)c(O)c2)nc(C)c1C(=O)N           | 85000 | nM |
| CHEMBL452658  | C[C@H](CCC(O)C(C)(C)O)[C@H]1CC[C@@]2(C)C3=C(CC[C@]12          | 85000 | nM |
| CHEMBL1813382 | C)[C@@]4(C)C[C@H](OC(=O)CC(C)(O)CC(=O)O)C(=O)C(C)(C)[         | 85000 | nM |
| CHEMBL1813382 | C@@H]4CC3                                                     | 85000 | nM |
| CHEMBL1813382 | ONC(=O)c1cc(OCc2ccc(F)cc2)ccc1O                               | 85000 | nM |

|               |                                                                                                                                                           |        |    |
|---------------|-----------------------------------------------------------------------------------------------------------------------------------------------------------|--------|----|
| CHEMBL448271  | CN([C@@H](Cc1ccc(Oc2cc3cc(c2O)c4cccc5c(C[C@@H](N)C(=O)N[C@@H](C(=O)N[C@H]3C(=O)O)c6cc(Cl)c(O)c(Cl)c6)c[nH]c45)cc1)C(=O)O)C(=O)[C@H](N)c7cc(Cl)c(O)c(Cl)c7 | 86000  | nM |
| CHEMBL1269892 | CCC(=O)OC1=NN(C(=O)/C/1=C\c2ccc(OC)c(OCc3ccc(F)cc3)c2)c4ccc                                                                                               | 88000  | nM |
| CHEMBL238632  | c(Br)c4                                                                                                                                                   | 89000  | nM |
| CHEMBL240544  | O=C(Nc1cccc(\C=C\C(=O)e2cccc2)c1)c3cccs3                                                                                                                  | 89000  | nM |
| CHEMBL391949  | Nc1cc(O)nc(SCC(=O)c2ccc(O)c(O)c2)n1                                                                                                                       | 90000  | nM |
| CHEMBL236067  | CCOc1ccc(cc1)C(=O)C2=C(O)C(=O)N(C2c3ccc(OC)cc3)c4nccs4                                                                                                    | 90000  | nM |
| CHEMBL239275  | OC1=C(C(N(C1=O)c2nc3ccccc3s2)c4ccnc4)C(=O)c5ccc(Cl)cc5                                                                                                    | 90000  | nM |
| CHEMBL472204  | CCCC(=O)NC(c1ccc(OC)c(OC)c1)c2cc(Cl)c3ccnc3c2O                                                                                                            | 90000  | nM |
| CHEMBL512918  | CN1C(=NC(=O)c2cccc12)NS(=O)(=O)c3cc(C)c(Cl)cc3SCc4cccc4                                                                                                   | 90000  | nM |
| CHEMBL3415839 | Clc1ccc(cc1)C(=O)C2=NS(=O)(=O)c3ccc(Cl)cc3S2                                                                                                              | 90000  | nM |
| CHEMBL1774052 | CCOC(=O)\C(=C\C(=O)\C=C\c1ccn(Cc2ccc(F)cc2)c1)\O                                                                                                          | 90500  | nM |
| CHEMBL247960  | OC1=C2C(=O)N(Cc3cccc4cccc34)C(=O)C2=C5CCCCCN5C1=O                                                                                                         | 91500  | nM |
| CHEMBL238633  | COc1ccc(cc1OC)[C@@H]2CC(=O)C[C@H](c3occc3)C24C(=O)OC(C                                                                                                    | 92000  | nM |
| CHEMBL474035  | )C)OC4=O                                                                                                                                                  | 92000  | nM |
| CHEMBL1682034 | O=C(Oc1cccc1\C=C\C(=O)e2cccc2)C3=Cc4cccc4OC3=O                                                                                                            | 92000  | nM |
| CHEMBL263887  | OC(=O)\C(=C\C(=O)c1cccc(NC(=O)c2cccc2Cl)c1)\O                                                                                                             | 92000  | nM |
| CHEMBL455050  | OC(=O)c1cc(Cl)cc(C(=O)\C=C\c2cccc(Cl)c2Cl)c1O                                                                                                             | 92300  | nM |
| CHEMBL474034  | CCOC(=O)\C(=C\C(=O)c1cn(Cc2ccc(F)cc2)c3cccc(OC)c13)\O                                                                                                     | 93000  | nM |
| CHEMBL541701  | COc1ccc(NC(=O)c2cc(c(SCc3cccc3)cc2Cl)S(=O)(=O)NC4=Nc5cccc                                                                                                 | 95000  | nM |
| CHEMBL1813383 | 5C(=O)N4)cc1                                                                                                                                              | 96000  | nM |
| CHEMBL246950  | COc1ccc(cc1)C(=O)Nc2cccc(c2)C(=O)\C=C(/O)\C(=O)O                                                                                                          | 97000  | nM |
| CHEMBL498635  | COc1c2CCc3cc4C5Sc6cccc6N5C(=O)c4c(O)c3c2c(O)c7C(=O)c8cc(O                                                                                                 | 97000  | nM |
| CHEMBL45578   | )c(C)c(O)c8C(=O)c17                                                                                                                                       | 97500  | nM |
| CHEMBL3415855 | OC(=O)c1cc(on1)c2ccc(cc2)[N+](=O)[O-]                                                                                                                     | 97720  | nM |
| CHEMBL387679  | ONC(=O)c1c(O)cccc1OCc2ccc(F)cc2                                                                                                                           | 98000  | nM |
| CHEMBL399412  | COc1ccc(cc1)[C@H]2CC(=O)CCC23C(=O)OC(C)(C)OC3=O                                                                                                           | 98000  | nM |
| CHEMBL240974  | OC(=O)c1ccc(cc1O)c2oc(\C=C\3/SC(=S)NC3=O)cc2                                                                                                              | 100000 | nM |
| CHEMBL241184  | CCOC(=O)C(=O)CC(=O)\C=C\c1cccn1Cc2ccc(F)cc2                                                                                                               | 100000 | nM |
| CHEMBL241185  | CCOC(=O)\C(=C\C(=O)\C=C\c1cccn1Cc2ccc(F)cc2)\O                                                                                                            | 100000 | nM |
| CHEMBL490208  | Clc1ccc2NC(=O)c3cccc3c2c1                                                                                                                                 | 100000 | nM |
| CHEMBL455952  | CN1C(=O)c2c3CCc3sc2N=C1SCC(=O)NNC(=O)c4cccc(O)c4                                                                                                          | 100000 | nM |
| CHEMBL1271425 | Oc1cccc(NC(=O)c2cc(cc(c2)C(=O)Nc3cccc(O)c3)N4C(=O)c5cccc5C4                                                                                               | 100000 | nM |
| CHEMBL1813381 | =O)c1                                                                                                                                                     | 100000 | nM |
| CHEMBL1813494 | CCc1nc2sc3CCCCc3c2c4nnc(SCC(=O)NNC(=O)c5ccc(OC)cc5)n14                                                                                                    | 100000 | nM |
| CHEMBL1909977 | CCc1cccc2c(SCC(=O)NNC(=O)c3cccc3[N+](=O)[O-                                                                                                               | 100000 | nM |
| CHEMBL2311878 | ]nc(nc12)c4ccc(F)cc4                                                                                                                                      | 100000 | nM |
| CHEMBL2311902 | COc1ccc(Br)cc1\C=C\C(=O)C2=C(O)C=C(OC2=O)\C=C\c3ccc(cc3)N(C                                                                                               | 100000 | nM |
|               | C)C                                                                                                                                                       | 100000 | nM |
|               | OC(=O)c1cc([nH]n1)c2cccc(OCc3ccccc3)c2                                                                                                                    | 100000 | nM |
|               | COc1ccc(\C=C/2\C(=NN(C2=O)c3cccc(Br)c3)OC(=O)C)cc1OCc4ccc(F                                                                                               | 100000 | nM |
|               | )cc4                                                                                                                                                      | 100000 | nM |
|               | ONC(=O)c1ccc(OCc2ccc(F)cc2)cc1O                                                                                                                           | 100000 | nM |
|               | Oc1cccc(C(=O)NCCc2c[nH]c3ccccc23)c1O                                                                                                                      | 100000 | nM |
|               | CNC(=O)c1cc(F)ccc1CNC(=O)c2cccc(O)c2O                                                                                                                     | 100000 | nM |
|               | COc1ccc(CCN2C(C(=C(O)C2=O)C(=O)c3ccccc3)c4ccc(O)cc4)cc1                                                                                                   | 100000 | nM |
|               | Oc1c(Br)cc(Br)cc1\C=N\NC(=O)CP(=O)(c2cccc2)c3ccccc3                                                                                                       | 100000 | nM |
|               | OC1=Cc2cccc2\C(=N/Nc3ccc(Cl)cc3)\C1=O                                                                                                                     | 100000 | nM |

## 8.4 Rev training set

|               |                                                                                                                                        |        |    |
|---------------|----------------------------------------------------------------------------------------------------------------------------------------|--------|----|
| CHEMBL1374066 | <chem>Nc1ccc2nonc2c1[N+](=O)[O-]</chem>                                                                                                | 690.35 | nM |
| CHEMBL2000619 | <chem>CN(C)c1ccc(cc1)\N=C\2/C(=O)N(C)c3cccc4c(O)c5cccc5c2c34</chem>                                                                    | 1047   | nM |
| CHEMBL1864348 | <chem>Oc1ccc(\C=N\Nc2cc(nc(n2)N3CCCC3)N4CCCC4)cc1</chem>                                                                               | 1364   | nM |
| CHEMBL1378470 | <chem>CCOc1cc(ccc1N)c2ccc(N)c(OCC)c2</chem>                                                                                            | 2471   | nM |
| CHEMBL1410045 | <chem>CN(C)c1ccc(\C=C/2\C(=O)ON=C2C)cc1</chem>                                                                                         | 2861   | nM |
| CHEMBL1517523 | <chem>[O-][N+](=O)\C=C\1/SCC(=O)N1c2cccc2</chem>                                                                                       | 3035   | nM |
| CHEMBL1527986 | <chem>CCOC(=O)CN1C(=O)C(=Nc2cccc12)c3cc(Br)ccc3N</chem>                                                                                | 4534   | nM |
| CHEMBL1391213 | <chem>Nc1cccc(c1)C(=O)OCC(=O)Nc2cccc3C(=O)c4cccc4C(=O)c23</chem>                                                                       | 5219   | nM |
| CHEMBL1303557 | <chem>[I-].CC[n+]<sub>1</sub>c(oc2cccc12)\C=C\Nc3cccc3</chem>                                                                          | 5664   | nM |
| CHEMBL1579180 | <chem>COc1ccc(NS(=O)(=O)c2ccc(Cl)s2)en1</chem>                                                                                         | 6301   | nM |
| CHEMBL1460312 | <chem>CCCCN1C(=O)Nc2nc3cc(NC(=O)C)ccc3nc2C1=O</chem>                                                                                   | 6497   | nM |
| CHEMBL1411766 | <chem>CCCCN(C(=O)c1oc(cc1)[N+](=O)[O-])C2=C(N)N(CC(C)C)C(=O)NC2=O</chem>                                                               | 7261   | nM |
| CHEMBL269410  | <chem>Nc1cccc2C(=O)N(C(=O)c12)c3cccc3</chem>                                                                                           | 7863   | nM |
| CHEMBL282433  | <chem>Cc1cccc1NC(=N)Nc2cccc2C</chem>                                                                                                   | 8312   | nM |
| CHEMBL1555842 | <chem>CC(CCC(C)C(C)(C)C)[C@@H]1CC[C@H]2C3C[C@H](OS(=S)(=S)O)[C@H]4C[C@H](OS(=S)(=S)O)[C@H](C[C@]4(C)[C@H]3CC[C@]12C)OS(=S)(=S)O</chem> | 8337   | nM |
| CHEMBL1357473 | <chem>CC(C)CCN(C(=O)CCSc1nc2cccc2[nH]1)C3=C(N)N(Cc4cccc4)C(=O)NC3=O</chem>                                                             | 8380   | nM |
| CHEMBL1493286 | <chem>CN(C1CCCC1)C(=O)CN2C(=O)c3cccc(N)c3C2=O</chem>                                                                                   | 8386   | nM |
| CHEMBL3211323 | <chem>Cc1nnc(C)n1\N=C\c2cccc(CC=C)c2O</chem>                                                                                           | 8387   | nM |
| CHEMBL1553837 | <chem>OCCN(CCO)c1cccc2C(=O)c3cccc3C(=O)c12</chem>                                                                                      | 8440   | nM |
| CHEMBL274921  | <chem>Nc1cc2nc3cccc3nc2cc1N</chem>                                                                                                     | 9529   | nM |
| CHEMBL166209  | <chem>OC(=O)c1ccc2C(=O)c3cccc3c4nenc1c24</chem>                                                                                        | 9783   | nM |
| CHEMBL1469144 | <chem>Cc1ccc2C(=O)c3cccc3c4cccc1c24</chem>                                                                                             | 10093  | nM |
| CHEMBL1425966 | <chem>Cc1ccc[n+](c1)c2nc([O-])sc2C=NNc3ccc(cc3)[N+](=O)[O-]</chem>                                                                     | 10098  | nM |
| CHEMBL1378107 | <chem>[O-][N+](=O)c1cccc1\C=C(/C#N)\C(=O)NCC=C</chem>                                                                                  | 10447  | nM |
| CHEMBL1308993 | <chem>COCCOC(=O)C1=C(N)N(CCOC)C(=S)S1</chem>                                                                                           | 11141  | nM |
| CHEMBL1568292 | <chem>COc1ccc(NC(=O)Nc2cc(C)cc(C)c2)en1</chem>                                                                                         | 11406  | nM |
| CHEMBL1478947 | <chem>COC(=O)c1cc2c(C)cc3ccc(C)cn3c2c1C(=O)OC</chem>                                                                                   | 12248  | nM |
| CHEMBL68500   | <chem>O=C1NC(=O)c2nc3cccc3nc2N1</chem>                                                                                                 | 12395  | nM |
| CHEMBL1446983 | <chem>OC1=CC(=O)c2cccc3cccc1c23</chem>                                                                                                 | 13868  | nM |
| CHEMBL1494927 | <chem>Cc1c(O)ccc2C=C(C(=O)Oc12)S(=O)(=O)c3cccc3</chem>                                                                                 | 14216  | nM |
| CHEMBL1456904 | <chem>CN1C(=O)C=C2c3cccc3C(=O)c4c(ccc1c24)N5CCCC5</chem>                                                                               | 14250  | nM |
| CHEMBL1560136 | <chem>COc1ccc2nc(N3CCCC3)c(cc2c1)C#N</chem>                                                                                            | 14753  | nM |
| CHEMBL1354016 | <chem>CC(=O)Nc1ccc2nc3cccc3nc2c1</chem>                                                                                                | 14833  | nM |
| CHEMBL1585268 | <chem>CC(=O)N1CCN(CC1)C2=Nc3cccc4cccc2c34</chem>                                                                                       | 15785  | nM |
| CHEMBL1391235 | <chem>COc1cc(O)cc2cc3OC(C)(O)CC(=O)c3c(O)c12</chem>                                                                                    | 16241  | nM |
| CHEMBL1566518 | <chem>COc1ccc(NC(=O)c2oc(cc2)c3ccc(cc3)C(=O)C)en1</chem>                                                                               | 16416  | nM |
| CHEMBL1365400 | <chem>CCN1C\C=C\c2cccs2\c3nc4cccc4c(C(=O)O)c3C1</chem>                                                                                 | 16969  | nM |
| CHEMBL1574146 | <chem>Nc1cccc2C(=O)N(Cc3cccc(Cl)c3)C(=O)c12</chem>                                                                                     | 17851  | nM |
| CHEMBL1549677 | <chem>CC1CN(CC(C)O1)C2=Nc3cccc4cccc2c34</chem>                                                                                         | 18230  | nM |
| CHEMBL1378413 | <chem>COC(=O)[C@@]1(C#N)[C@@H]2C=CC(=CN2[C@H])([C@@H]1c3ccc(F)cc3)C(=O)N)C(=O)C</chem>                                                 | 18291  | nM |
| CHEMBL1332240 | <chem>COc1ccc(cc1)c2oc(C)c(C[S+])([O-])CC(=O)NCc3ccccn3)n2</chem>                                                                      | 19371  | nM |
| CHEMBL1385436 | <chem>Cc1ccc(cc1)N2CCN(CC2)c3ccc(NCc4nc5cccc5n4C)cc3</chem>                                                                            | 19597  | nM |
| CHEMBL1575084 | <chem>CCn1c(CSc2ncn2C)nc3ccc(ccc13)C(=O)O</chem>                                                                                       | 19748  | nM |
| CHEMBL1437954 | <chem>CCOc1ccc2nc(N3CCCN(CC3)C(=O)Nc4cccc4C)c(cc2c1)C#N</chem>                                                                         | 20324  | nM |

|               |                                                                           |       |    |
|---------------|---------------------------------------------------------------------------|-------|----|
| CHEMBL1442125 | OC(=O)c1cccc1N=Nc2ccc(O)cc2                                               | 22020 | nM |
| CHEMBL1998429 | Cc1oc(cc1)C(=O)N\N=C\c2oc(cc2)c3ccc(Br)cc3[N+](=O)[O-]                    | 25109 | nM |
| CHEMBL1549136 | COc1ccc(NC(=O)Cc2ccccc2)cn1                                               | 25171 | nM |
| CHEMBL1541803 | C1C1=CCC2C(C1)C(=O)N(CC(=O)NCc3ccccc3)C2=O                                | 25752 | nM |
| CHEMBL1578982 | Cc1ccc(cc1)S(=O)(=O)N[C@H](C(=O)O)c2ccc3C(=CC(=O)O)c3c2)C(F)(F)F)c4ccccc4 | 26862 | nM |
| CHEMBL1470560 | C1CN(CCO1)C2=Nc3cccc4cccc2c34                                             | 29228 | nM |
| CHEMBL1436090 | CCCN1C(=O)NC(=O)C(=C1N)N(CCOC)C(=O)Cc2ccc(s2)S(=O)(=O)N3CCOCC3            | 39575 | nM |
| CHEMBL3190665 | COc1ccc(\C=N\c2c(nc3cccn23)c4occc4)cc1OC                                  | 56122 | nM |
| CHEMBL1415258 | CCc1ccc2nc3nc(C)cc(C)c3c(N)c2c1                                           | 58820 | nM |
| CHEMBL1415985 | FC(F)(F)C1=CC(=O)Oc2cc(OC(=O)CN3C(=O)NC4(CCCCC4)C3=O)cc2                  | 65306 | nM |
| CHEMBL1445765 | COc1ccc2nc(N3CCC(O)CC3)c(cc2c1)C#N                                        | 67576 | nM |
| CHEMBL1981093 | Nc1nnnn1\N=C\c2cc(Cl)ccc2O                                                | 75326 | nM |
| CHEMBL1546264 | COc1ccc(\C=C(/CC(=O)O)\c2nc3ccccc3s2)cc1O                                 | 75365 | nM |
| CHEMBL1573564 | OCCCN1C(=O)C2=C(SCCS2)C1=O                                                | 75380 | nM |
| CHEMBL1523792 | CCOC(=O)c1[nH]cnc1N=Nc2c(O)ccc3ccccc23                                    | 75386 | nM |
| CHEMBL1495503 | Cc1ccc(cc1)S(=O)(=O)Nc2cc3c(C(=O)Nc4ccccc4)c(C)oc3c5ccccc25               | 75403 | nM |
| CHEMBL1601851 | CCOC(=O)c1cc2c(ccn2C)n1CC(=O)N(Cc3ccccc3)c4ccccc4                         | 75403 | nM |
| CHEMBL1442453 | COc1ccc(Nc2nnc(SCC3=CC(=O)N4C=CSC4=N3)s2)cc1                              | 75409 | nM |
| CHEMBL41286   | CC(=O)Oc1ccc2C(=O)c3ccc(cc(OC(=O)C)c3C(=O)c12)C(=O)O                      | 75411 | nM |
| CHEMBL1362550 | CCOc1cc(cc(Br)c1O)C2C(=CN(C=C2C(=O)OC)C3CCCC3)C(=O)OC                     | 75412 | nM |
| CHEMBL11475   | CC1=CC(=O)c2c(O)ccc(O)c2C1=O                                              | 75414 | nM |
| CHEMBL456295  | COc1cc2C(=O)c3nccc4c(OC)c(OC)c(OC)c(2cc1OC)c34                            | 75418 | nM |
| CHEMBL1503865 | CCN(CC)S(=O)(=O)c1ccc(N2CCCC2)c(NS(=O)(=O)c3ccc(F)cc3)c1                  | 75418 | nM |
| CHEMBL88326   | Nc1ccc(O)c2C(=O)c3ccccc3C(=O)c12                                          | 75421 | nM |
| CHEMBL1337685 | COC(=O)c1ccc2N=C3CCCC(=C3Sc2c1)O                                          | 75421 | nM |
| CHEMBL1381318 | Nc1c(O)ccc2C(=O)c3ccccc3C(=O)c12                                          | 75421 | nM |
| CHEMBL1987546 | Clc1ccc(\C=N\c2c(nc3cccn23)c4occc4)cc1                                    | 75421 | nM |
| CHEMBL1421995 | Cc1c(O)ccc(c1O)c2[nH]nc(C(=O)O)c2c3nc4ccccc4s3                            | 75423 | nM |
| CHEMBL1587496 | CCOC(=O)c1cc2c(ccn2C)n1CC(=O)N(Cc3ccccc3)c4ccc(F)cc4                      | 75425 | nM |
| CHEMBL1376371 | CN1CC2=Cc3ccccc3OC24Oc5ccccc5C=C4C1                                       | 75427 | nM |
| CHEMBL1537049 | CCOC(=O)c1cc2c(ccn2C)n1CC(=O)N3CCN(CC3)c4cccc(c4)C(F)(F)F                 | 75427 | nM |
| CHEMBL294264  | Oc1cc(O)c2C(=O)c3ccccc3C(=O)c2c1O                                         | 75434 | nM |
| CHEMBL1419027 | COc1ccc(N2CCCC2)c(NC(=O)c3oc(Br)cc3)c1                                    | 75442 | nM |
| CHEMBL1502839 | CCn1c(CSc2nnc3cccn23)nc4cc(ccc14)C(=O)O                                   | 75449 | nM |
| CHEMBL1397154 | CC(OC(=O)\C(=C\c1ccc(cc1)N(C)C)\C#N)C(=O)NCc2occc2                        | 75472 | nM |
| CHEMBL1469407 | Oc1nc2cc3ccccc3cc2nc1C(F)(F)F                                             | 75487 | nM |
| CHEMBL1312914 | Nc1c(nc2cccn12)c3cccc(c3)[N+](=O)[O-]                                     | 75502 | nM |
| CHEMBL539676  | COc1ccc(Nc2nc(N)nc(CN(C)C3CCCC3)n2)cc1                                    | 79370 | nM |
| CHEMBL546344  | [Cl-].[N+]c1nc(Nc2ccc(Cl)cc2)nc3ccccc13                                   | 79370 | nM |
| CHEMBL1299250 | COc1ccc(CCNC(C)CCc2ccc(OC)cc2)cc1                                         | 79370 | nM |
| CHEMBL1311876 | [Cl-].[N+]CCCC(=O)N1c2ccccc2[S]c3ccccc13                                  | 79370 | nM |
| CHEMBL1349146 | COc1ccc(\C=C\C2=[N+](C)OC(=C2)c3ccc(C)cc3)cc1.[Cl-]                       | 79370 | nM |
| CHEMBL1369795 | CNCCCOc1ccc(cc1)C(C)(C)c2ccccc2                                           | 79370 | nM |
| CHEMBL1382621 | Cc1nc(Nc2ccncc2)c3oc4ccccc4c3n1                                           | 79370 | nM |
| CHEMBL1385794 | [Br-].C[n+].1c2SCC(=Nn2c3ccccc13)c4ccc(Cl)cc4                             | 79370 | nM |
| CHEMBL1386820 | CC(C)COc1ccc(Cc2cnc(N)nc2N)cc1                                            | 79370 | nM |
| CHEMBL1401938 | Cc1ccc(cc1)C(=O)NNC(=O)CSc2n[nH]c3c4cc(F)ccc4nc3n2                        | 79370 | nM |
| CHEMBL1405895 | CC1=NN(C(=O)C1N=Nc2ccc(N)cc2)c3ccccc3                                     | 79370 | nM |

|               |                                                  |       |    |
|---------------|--------------------------------------------------|-------|----|
| CHEMBL1418879 | [Cl-].CC([N+]Cc1ccc(cc1)N(C)C)C2CC3CCC2C3        | 79370 | nM |
| CHEMBL1485867 | COc1cccc1NC2=NC(=NC(N2)c3ccc(Cl)cc3)N            | 79370 | nM |
| CHEMBL1503307 | COc1cccc(OC)c1c2nn3c(nnc3s2)c4cc([nH]n4)c5cccc5  | 79370 | nM |
| CHEMBL1508313 | CCOC(=O)c1c(C)n(C)c2ccc(O)c(CN(C)C)c12           | 79370 | nM |
| CHEMBL1540598 | [Br-].Bre1ccc(cc1)C(=O)C[N+]2C3=NCCN3c4cccc24    | 79370 | nM |
| CHEMBL1557351 | [Cl-].CCN(CC)CC[N+]C1=NCCN2C1=CC3=CC(OC)=CC=C23  | 79370 | nM |
| CHEMBL1572144 | [Cl-].COc1ccc(cc1)C2N=C(N)N=C([N+])N2c3ccc(C)cc3 | 79370 | nM |
| CHEMBL1587299 | COc1cccc(Nc2nc(N)nc(n2)c3oc4cccc4c3C)c1          | 79370 | nM |
| CHEMBL1599483 | [Cl-].COC(=O)c1c(C(=O)OC)n(CCC[N+])c2ccc(C)cc12  | 79370 | nM |
| CHEMBL1603067 | CC(C)C[NH+]=C1C=C(Oc2ccc(Cl)cc12)c3cccc3.[Cl-]   | 79370 | nM |
| CHEMBL1603229 | CN(C)CC(O)COc1ccc(cc1)c2ccc(cc2)C#N              | 79370 | nM |
| CHEMBL1704267 | Fe1ccc(\C=N\NC(=O)c2cc(nc3cccc23)c4occc4)cc1     | 79370 | nM |
| CHEMBL1706577 | Fe1ccc(\C=N\NC(=O)c2cc(nc3cccc23)c4occc4)c1      | 79370 | nM |

## 8.5 TAT training set

|               |                                                                                                                                                                                                                           |      |    |
|---------------|---------------------------------------------------------------------------------------------------------------------------------------------------------------------------------------------------------------------------|------|----|
| CHEMBL1553368 | O.Cl.COC(=O)c1cccc1C2=C3C=CC(=N)C=C3Oc4cc(N)ccc24                                                                                                                                                                         | 190  | nM |
| CHEMBL1536556 | COc1ccc(O)c(c1)C(=O)C2N(C(=O)c3cccc23)c4ccc(C)cc4<br>O[C@H]1[C@H]2[C@H](CC(=O)O)C(=O)O[C@@H]3C(COC(=O)c4cc(O)c(O)c(O)c4)O[C@@H](OC(=O)c5cc(O)c(O)c(O)c5)[C@@H](OC(=O)c6cc(O)c(O)c(OC1=O)c26)[C@H]3OC(=O)c7cc(O)c(O)c(O)c7 | 303  | nM |
| CHEMBL1391063 | OC(=O)c1ccc(cc1Cl)N2N=C(\C=C\C=C\c3occc3)\C2=O)C(F)(F)F                                                                                                                                                                   | 556  | nM |
| CHEMBL1398964 | COc1cccc(c1)C2CC(c3cccc3OC)n4nc(N)nc4N2                                                                                                                                                                                   | 615  | nM |
| CHEMBL1600422 | OC(=O)C1Ne2c(O)cccc2C3C=CCC13                                                                                                                                                                                             | 686  | nM |
| CHEMBL1527520 | Cc1ccc(C)n1NC2=NC(=O)CS2                                                                                                                                                                                                  | 702  | nM |
| CHEMBL1334586 | CC1(C)OC(=C(C(=O)O1)C2=NCCC2)O                                                                                                                                                                                            | 881  | nM |
| CHEMBL1455440 | Cc1cccc(c1)N2C(=O)NC(=O)\C(=C\c3cc4OCOc4cc3[N+](=O)[O-])\C2=O                                                                                                                                                             | 881  | nM |
| CHEMBL1420548 | Cc1ccc(C)n1c2sccc2C(=O)O                                                                                                                                                                                                  | 906  | nM |
| CHEMBL1504655 | O=C1NC(=S)S/C1=C\c2oc(SCc3occc3)cc2                                                                                                                                                                                       | 908  | nM |
| CHEMBL1405834 | Ne1c(sc2nc3\C=C/c4occc4)\CCc3c(c5occc5)c12)C(=O)NC6CC6                                                                                                                                                                    | 926  | nM |
| CHEMBL1546396 | CNC(=O)c1cccc1NC(=O)c2ccc(C)c(c2)S(=O)(=O)N3CCCCC3                                                                                                                                                                        | 937  | nM |
| CHEMBL1453703 | CCOC(=O)c1ccc(NS(=O)(=O)c2ccc3N(C)C(=O)Oc3c2)cc1                                                                                                                                                                          | 968  | nM |
| CHEMBL1346508 | Sc1nnc(COc2ccc3OCOc3c2)n1c4cccc4                                                                                                                                                                                          | 995  | nM |
| CHEMBL1405604 | Cc1cccc1Cc2c(C)nc3c(cnn3c2C)C(=O)NCc4ccc5OCOc5c4                                                                                                                                                                          | 1029 | nM |
| CHEMBL1446786 | CCN(C(=O)C1=COC(=O)C(=C1)Br)c2ccc3OCOc3c2                                                                                                                                                                                 | 1058 | nM |
| CHEMBL1375570 | Fe1ccc(NC(=O)C(N2CCN(CC2)S(=O)(=O)c3ccc4cccc4c3)c5cccc5)c1                                                                                                                                                                | 1170 | nM |
| CHEMBL1409647 | OC(=O)C(Cc1cccc1)N2C(=S)S\C(=C/C=C/c3occc3)\C2=O                                                                                                                                                                          | 1234 | nM |
| CHEMBL1575767 | Clc1ccc(cc1)S(=O)(=O)N2CCN(CC(=O)Nc3ccc4OCCOc4c3)CC2                                                                                                                                                                      | 1259 | nM |
| CHEMBL1324208 | OC(=O)CC(N1C(=S)S\C(=C/C=C/c2occc2)\C1=O)C(=O)O                                                                                                                                                                           | 1306 | nM |
| CHEMBL1508847 | CC1=C(C#N)C(=O)N(C2CCS(=O)(=O)C2)C(=O)/C1=C\c3oc(C)cc3                                                                                                                                                                    | 1334 | nM |
| CHEMBL1402056 | [O-][N+](=O)c1ccc(cc1)c2oc(\C=N\c3c(nc4cccn34)c5occc5)cc2                                                                                                                                                                 | 1347 | nM |
| CHEMBL1710520 | CC(C)C(N1C(=S)S\C(=C/C=C/c2occc2)\C1=O)C(=O)O                                                                                                                                                                             | 1400 | nM |
| CHEMBL257359  | COc1cc(NC(=O)CS(=O)(=O)c2ccc(C)cc2)cc(OC)c1OC                                                                                                                                                                             | 1404 | nM |
| CHEMBL1423980 | COC(=O)CS1nnc(CNC(=O)Cc2cccc2)n1C                                                                                                                                                                                         | 1416 | nM |
| CHEMBL3188788 | CCn1cc(Br)c(n1)C(=O)Nc2cccc(SC)c2                                                                                                                                                                                         | 1433 | nM |
| CHEMBL1541610 | COCc1cc(C)nc(NCCO)c1C#N                                                                                                                                                                                                   | 1434 | nM |
| CHEMBL1583518 | CCOC(=O)CNc1ccc2OCOc2c1                                                                                                                                                                                                   | 1439 | nM |
| CHEMBL1312986 | CCN1CCN(CC1)C2=NC(=O)\C(=C\c3oc(C)cc3)\S2                                                                                                                                                                                 | 1469 | nM |
| CHEMBL1412911 | CN(C)c1ccc(s1)C2=C(Cl)C(=O)C(=C(Cl)C2=O)N3CCCC3                                                                                                                                                                           | 1469 | nM |
| CHEMBL1524916 |                                                                                                                                                                                                                           | 1536 | nM |

|               |                                                                                                   |      |    |
|---------------|---------------------------------------------------------------------------------------------------|------|----|
| CHEMBL255881  | <chem>CC(N1C(=S)\S\C(=C/C=C/c2occc2)\C1=O)C(=O)O</chem>                                           | 1541 | nM |
| CHEMBL1331134 | <chem>O=C1CC(=O)N(Cc2occc2)C(=S)N1</chem>                                                         | 1564 | nM |
| CHEMBL1375860 | <chem>CCOC1(OCC)N=C(N)C2(C#N)C(c3cccc(OC)c3OC)C12C#N</chem>                                       | 1593 | nM |
| CHEMBL1544334 | <chem>CC(C)CN1C(=O)c2ccccc2N=C1SCC(=O)NC(=O)Nc3ccc4OCCOc4c3</chem>                                | 1619 | nM |
| CHEMBL1430473 | <chem>OC(=O)C1Nc2c(O)cc(Cl)c(c2C3C=CCC13)[N+](=O)[O-]</chem>                                      | 1639 | nM |
| CHEMBL6246    | <chem>Oc1cc2C(=O)Oc3c(O)c(O)cc4C(=O)Oc(c1O)c2c34</chem>                                           | 1669 | nM |
| CHEMBL1411862 | <chem>OCCNC(=O)Nc1ccc2nc(c3occc3)c(nc2c1)c4occc4</chem>                                           | 1756 | nM |
| CHEMBL196072  | <chem>NCCCC[C@H](COC(=O)N)NC(=O)CN(CCCCN)C(=O)OC[C@H](N)CCCN=C(N)N</chem>                         | 1799 | nM |
| CHEMBL1335321 | <chem>O=C(NC1CC1)Nc2ccc3nc(c4occc4)c(nc3c2)c5occc5</chem>                                         | 1833 | nM |
| CHEMBL3392033 | <chem>NC1=C(C#N)C2=C(CCCCC2)C(=S)S1</chem>                                                        | 1842 | nM |
| CHEMBL1528814 | <chem>COc1cccc2C3C=CCC3C(Nc12)C(=O)O</chem>                                                       | 1870 | nM |
| CHEMBL1492764 | <chem>CCC(N(CCCO)Cc1cc2cc(C)cc(C)c2nc1O)c3nnnn3C(C)(C)CC</chem>                                   | 1879 | nM |
| CHEMBL1595235 | <chem>C=CCSC1=N\C(=C/C=C/c2occc2)\C(=O)S1</chem>                                                  | 1889 | nM |
| CHEMBL1399331 | <chem>OC(=O)C1Nc2c(cccc2C(=O)O)C3C(Cl)C(CC13)Sc4cccc4[N+](=O)[O-]</chem>                          | 1906 | nM |
| CHEMBL1576095 | <chem>CCCN1C(=O)\S\C(=C/c2ccc(cc2C)N3CCOCC3)\C1=O</chem>                                          | 1918 | nM |
| CHEMBL1493158 | <chem>CC(C)OC(=O)c1cccc(n1)C(=O)O</chem>                                                          | 1924 | nM |
| CHEMBL1597042 | <chem>O=C1NC(=O)\C(=C/C=C/c2occc2)\C(=O)N1Cc3occc3</chem>                                         | 1953 | nM |
| CHEMBL1373961 | <chem>CCOC(=O)C1CCN(CC1)C(c2cccs2)c3sc4nc(C)nn4c3O</chem>                                         | 1957 | nM |
| CHEMBL1542128 | <chem>CCCC1=NN2C(=N)\C(=C/c3oc(SCc4occc4)cc3)\C(=O)N=C2S1</chem>                                  | 1976 | nM |
| CHEMBL1464853 | <chem>C1C1=C(N2CCCC2)C(=O)C(=C(C1=O)c3cnc(s3)N4CCCC4)C1</chem>                                    | 1991 | nM |
| CHEMBL1482883 | <chem>Oc1ccc(cc1)N2C(=O)\S\C(=C/C=C/c3occc3)\C2=O</chem>                                          | 1998 | nM |
| CHEMBL1374242 | <chem>OCCNC(=O)Nc1ccc2nc(c3occc3)c(nc2c1)c4occc4</chem>                                           | 2009 | nM |
| CHEMBL1526171 | <chem>CCOC(=O)C1CCN(CC1)C(=O)Nc2ccc3nc(c4occc4)c(nc3c2)c5occc5</chem>                             | 2009 | nM |
| CHEMBL1335699 | <chem>OC(=O)\C=C\C(=O)Nc1ccnc1</chem>                                                             | 2016 | nM |
| CHEMBL213432  | <chem>Cc1ccc(C)n1c2cccc(c2)C(=O)O</chem>                                                          | 2069 | nM |
| CHEMBL1371777 | <chem>Clc1cccc1CSc2nnc(c3occc3)c(n2)c4occc4</chem>                                                | 2074 | nM |
| CHEMBL1310699 | <chem>O=C(NC1CCCC1)c2ccc3nc(c4occc4)c(nc3c2)c5occc5</chem>                                        | 2080 | nM |
| CHEMBL1523317 | <chem>Cc1cc2e(N)cccc2nn1</chem>                                                                   | 2080 | nM |
| CHEMBL1506682 | <chem>OC1C(O)C(OC2=C(Oc3cc(O)cc(O)c3C2=O)c4ccc(O)c(O)c4)OC(C1O)C(=O)O</chem>                      | 2123 | nM |
| CHEMBL1457427 | <chem>COc1ccc(NC(=O)c2cccc(c2)S(=O)(=O)Nc3ccc(Br)cc3)cn1</chem>                                   | 2154 | nM |
| CHEMBL1366915 | <chem>NC(=O)c1cc(N)ccc1N2CCCC2</chem>                                                             | 2165 | nM |
| CHEMBL1501132 | <chem>COCCNC(=O)Nc1ccc2nc(c3occc3)c(nc2c1)c4occc4</chem>                                          | 2168 | nM |
| CHEMBL1505467 | <chem>Cc1nc2cc(nn2c(O)c1Cl)c3ccsc3n4c(C)ccc4C</chem>                                              | 2172 | nM |
| CHEMBL1384172 | <chem>o1cccc1c2nc(c3occc3)c(nc2c4occc4)c5occc5</chem>                                             | 2184 | nM |
| CHEMBL1584917 | <chem>CN=C1C=CC=CC(=C1O)c2ccc3cc4OCCc4cc3n2</chem>                                                | 2221 | nM |
| CHEMBL1334684 | <chem>OC(=O)C1Nc2ccc(cc2C3C=CCC13)C(=O)OC4CCCC4</chem>                                            | 2264 | nM |
| CHEMBL2001337 | <chem>Cc1ccc(en1)C(=O)N\N=C/c2oc(Br)c(Br)c2</chem>                                                | 2343 | nM |
| CHEMBL1470525 | <chem>CCN(CC)C(=O)c1oc(CS(=O)(=O)c2ccc(OC)cc2)cc1</chem>                                          | 2346 | nM |
| CHEMBL458328  | <chem>CCCCC#CCC#CCC#CCC#CCCC(=O)O</chem>                                                          | 2378 | nM |
| CHEMBL1424486 | <chem>Nc1nc(c2occc2)c(s1)c3occc3</chem>                                                           | 2391 | nM |
| CHEMBL1504113 | <chem>CN(C)[C@H]1C2CC3C(=C(O)[C@]2(O)C(=C(C(=O)NCN4CCCC4)C1=O)O)C(=O)c5c(O)cccc5[C@@]3(C)O</chem> | 2462 | nM |
| CHEMBL1567396 | <chem>CC(=O)c1ccc2NC(C3CC=CC3c2c1)C(=O)O</chem>                                                   | 2472 | nM |
| CHEMBL1416439 | <chem>O=C1N(NS(=O)(=O)c2ccccc2)C(=S)S/C1=C\C=C\c3occc3</chem>                                     | 2483 | nM |
| CHEMBL1302827 | <chem>N=C1N2N=CSC2=NC(=O)/C1=C/c3oc(SCc4occc4)cc3</chem>                                          | 2486 | nM |
| CHEMBL1698517 | <chem>COc1cc2Cc3cc(N)ccc3c2cc1N</chem>                                                            | 2509 | nM |
| CHEMBL1482554 | <chem>O=C(CSc1nenc2sccl2)Nc3oc(c4occc4)c(c5occc5)c3C#N</chem>                                     | 2524 | nM |
| CHEMBL1587849 | <chem>O=C(Nc1nc(c2occc2)c(s1)c3occc3)C4CCC4</chem>                                                | 2648 | nM |

|               |                                                                                                                  |      |    |
|---------------|------------------------------------------------------------------------------------------------------------------|------|----|
| CHEMBL3199404 | CCCOc1ccc(CC2=NN3C(=O)\C(=C\c4occc4)\SC3=NC2=O)cc1                                                               | 2675 | nM |
| CHEMBL1401747 | O=C(NN1C(=S)S\C(=C/C=C/c2occc2)\C1=O)c3cncnc3                                                                    | 2692 | nM |
| CHEMBL1402117 | Oc1nc(S)nc2Oc3nc(S)nc(O)c3C(c4ccc(Br)cc4)c12                                                                     | 2719 | nM |
| CHEMBL1566266 | Cc1ccccc1NC(=O)CSc2nnc(c3occc3)c(n2)c4occc4                                                                      | 2733 | nM |
| CHEMBL69612   | [O-][N+](=O)c1oc(\C=C\C=C\2/SC(=S)NC2=O)cc1                                                                      | 2758 | nM |
| CHEMBL1416218 | OC(=O)c1ccc(Cl)c2NC(C3CC=CC3c12)c4cccn4                                                                          | 2814 | nM |
| CHEMBL1452952 | Cc1occc1c2nnc3sc(nn23)c4cc(oc4C)c5ccc(Cl)cc5                                                                     | 2865 | nM |
| CHEMBL1548317 | CC1(OCCO1)c2ccc3noc(c4ccccc4)c3c2                                                                                | 2870 | nM |
| CHEMBL1497651 | CC1=C(C#N)C(=O)N(C2CCS(=O)(=O)C2)C(=O)/C1=C\c3occc3                                                              | 2882 | nM |
| CHEMBL1573365 | Cl.CCN(CC)c1ccc2NCCCc2c1                                                                                         | 2886 | nM |
| CHEMBL1304024 | FC(F)(F)C1=Nc2c(C=O)ccc3cccc(N1)c23<br>Cc1cc(\C=C\2/C(=O)NC(=O)N(C2=O)c3cccc(F)c3)c(C)n1c4cc(cc(c4)C(=O)O)C(=O)O | 2914 | nM |
| CHEMBL1609454 | CCOC1=CC=CC(=O)c2c(C)n(Cc3occc3)c(C)c12                                                                          | 2947 | nM |
| CHEMBL1378036 | Oc1ccccc1\C=N\c2c(nc3cccn23)c4occc4                                                                              | 2954 | nM |
| CHEMBL3196373 | Cc1oc(\C=C\C2=Cc3c(C#N)c(NC(=O)CSc4n[nH]c(N)n4)sc3C(C)(C)C2)cc1                                                  | 2965 | nM |
| CHEMBL1586326 | CCSC1=N\C(=C/C=C/c2occc2)\C(=O)S1                                                                                | 3043 | nM |
| CHEMBL1589300 | COC1=CC=CC(=O)c2c(C)n(c(C)c12)c3ccc(cc3)C(=O)O                                                                   | 3052 | nM |
| CHEMBL1364967 | COc1ccc2nc(c3occc3)c(nc2c1)c4occc4                                                                               | 3059 | nM |
| CHEMBL1305450 | O=C1CC(SC(=S)C2CCCC2=O)C(=O)N1                                                                                   | 3131 | nM |
| CHEMBL1872442 | COc1ccc(NC(=O)N2c3ccc(OC)cc3C(=CC2(C)C)C)cc1                                                                     | 3212 | nM |
| CHEMBL1487717 | Oc1ccccc1C=Nc2ccc(F)c3c(O)[nH]nc23                                                                               | 3286 | nM |
| CHEMBL1326606 | CCOC1=CC=CC(=O)c2c(C)n(c(C)c12)c3ccc(cc3)C(=O)O                                                                  | 3295 | nM |
| CHEMBL1477236 | Nc1ncnc2oc(c3occc3)c(c4occc4)c12                                                                                 | 3303 | nM |
| CHEMBL1334484 | OC(=O)c1ccccc2cccc(C3=C4C=CC(=O)C(=C4O)c5c(O)c(O)ccc35)O)c12                                                     | 3362 | nM |
| CHEMBL1723511 | Clc1ccc(cc1)N2C(=O)NC(=O)\C(=C\c3oc(Sc4nc5ccccc5[nH]4)cc3)\C2=O                                                  | 3379 | nM |
| CHEMBL1443088 | CC(=O)OCCCNc1cc(Sc2nc3ccccc3s2)c4nonc4c1[N+](=O)[O-]                                                             | 3404 | nM |
| CHEMBL1504429 | CCOC(=O)C1=C(N)N2C(=O)\C(=C\c3occc3)\SC2=C(C1c4occc4)C(=O)OC(C)C                                                 | 3414 | nM |
| CHEMBL3199921 | Cc1ccc(C)n1Cc2ccc(cc2)C(=O)O                                                                                     | 3450 | nM |
| CHEMBL408994  | COc1ccc(cc1)S(=O)(=O)c2c(N)n(Cc3occc3)c4nc5ccccc5nc24                                                            | 3451 | nM |
| CHEMBL1506843 | OCC1=C(CO)C(=O)c2c(O)ccc(O)c2C1=O                                                                                | 3462 | nM |
| CHEMBL1699836 | O=C(Nc1ccc2nc(c3occc3)c(nc2c1)c4occc4)N5CCCCC5                                                                   | 3482 | nM |
| CHEMBL1566165 | OCCCNc1ccc2nc(c3occc3)c(nc2c1)c4occc4                                                                            | 3560 | nM |
| CHEMBL1409603 | COc1ccccc1NS(=O)(=O)c2ccc3NC(C4CC=CC4c3c2)c5ccc(cc5)C(=O)O                                                       | 3584 | nM |
| CHEMBL1312212 | c1OC(=O)CCCNc1ccc(N2CCC3(CC2)OCCO3)c4noc5c6ccccc6C(=O)c1c45                                                      | 3585 | nM |
| CHEMBL1309430 | Cc1oc(C)c(c1)c2nc3c4c5CCc5sc4nc(O)n3n2                                                                           | 3590 | nM |
| CHEMBL1423705 | OC(=O)C1Nc2ccc(Br)cc2C3C=CCC13                                                                                   | 3658 | nM |
| CHEMBL201289  | Cc1ccc2NC(C3CC=CC3c2c1)C(=O)O                                                                                    | 3730 | nM |
| CHEMBL1376870 | O=C1N(C(=S)S/C1=C\c2occc2)c3ccnnc3                                                                               | 3753 | nM |
| CHEMBL1609550 | O=C(N\N=C\C=C/c1occc1)c2ccnnc2                                                                                   | 3901 | nM |
| CHEMBL1995275 | CC1\C(=C\c2occc2)\C(=O)\C(=C\c3occc3)\C1                                                                         | 3913 | nM |
| CHEMBL1568631 | OC1=CC=Cc2cc(O)c(O)c2C1=O                                                                                        | 3915 | nM |
| CHEMBL66953   | Cc1oc(CN2C(=S)Nc3ccc(cc3C2=O)N4CCOCC4)cc1                                                                        | 3958 | nM |
| CHEMBL1493956 | C(Sc1nnc(c2occc2)c(n1)c3occc3)c4ccccc4                                                                           | 3984 | nM |
| CHEMBL1449836 | Cc1oc(cc1)[C@@H]2C3COCC=C3C(=C(N)C2(C#N)C#N)C#N                                                                  | 4045 | nM |
| CHEMBL1527833 | CC1=C(C(C2=C(O)CC(CC2=N1)c3ccccc3)c4ccsc4)C(=O)Nc5ccccc5F                                                        | 4055 | nM |
| CHEMBL1507864 |                                                                                                                  | 4055 | nM |



|               |                                                                                                                      |      |    |
|---------------|----------------------------------------------------------------------------------------------------------------------|------|----|
| CHEMBL1394046 | CCN1C(=S)NC(=O)\C(=C\c2ccc(s2)[N+](=O)[O-])\C1=O                                                                     | 4071 | nM |
| CHEMBL1980204 | CCOC(=O)c1c(C)oc2c3ccccc3c(O)c(\C=N\Cc4cccn4)c12                                                                     | 4146 | nM |
| CHEMBL1351226 | CCOc1cccc(OCC)c2c(C)[n+](CC3CCCO3)c(C)c12.[O-]Cl(=O)(=O)=O                                                           | 4163 | nM |
| CHEMBL1383746 | O=C(N1CCC2(CC1)OCCO2)c3ccc4nc(c5occc5)c(nc4c3)c6occc6                                                                | 4259 | nM |
| CHEMBL1422059 | C(N1CCCc2ccccc12)c3nnc4CCCCCn34                                                                                      | 4289 | nM |
| CHEMBL1549687 | Oc1ccc2C(=O)\C(=C\c3occc3)\Oc2c1CN4CCCC4                                                                             | 4297 | nM |
| CHEMBL1586973 | COc1ccc(CCNC(=O)c2ccc3nc(c4occc4)c(nc3c2)c5occc5)cc1OC                                                               | 4318 | nM |
| CHEMBL1451059 | CCN(CC)Cc1cc(O)c(CN(CC)CC)cc1O                                                                                       | 4364 | nM |
| CHEMBL1347567 | CN=C1C=CC=CC=C1S                                                                                                     | 4407 | nM |
| CHEMBL1469243 | Cc1cc(C(=O)CSc2oc(nn2)c3occc3)c(C)n1Cc4occc4                                                                         | 4408 | nM |
| CHEMBL1320230 | Oc1ccccc1C(=O)NN2C(=S)S\C(=C/C=C/c3occc3)\C2=O                                                                       | 4462 | nM |
| CHEMBL1446668 | O=C(NCc1ccccc1)c2ccc3nc(c4occc4)c(nc3c2)c5occc5                                                                      | 4552 | nM |
| CHEMBL1424878 | CC(=O)c1sc2nc(ccc2c1N)c3occc3                                                                                        | 4641 | nM |
| CHEMBL1577840 | Cc1ccc(C=C2C(=C(Cl)C(=C2Cl)Cl)Cl)cc1                                                                                 | 4671 | nM |
| CHEMBL195705  | CCOC(=O)C(=O)NCc1oc(\C=C/2\N=C(C)C(=C2O)C(=O)OCC)cc1<br>CCCCN1C2=C(C=C(C#N)/C/1=N\C(=O)c3cccn3)C(=O)N4C=CC=C(C)C4=N2 | 4710 | nM |
| CHEMBL1997195 | O=C(NCc1ccccc1)c2ccc3nc(c4occc4)c(nc3c2)c5occc5                                                                      | 4743 | nM |
| CHEMBL1346172 | O=C(NCc1ccccc1)c2ccc3nc(c4occc4)c(nc3c2)c5occc5                                                                      | 4750 | nM |
| CHEMBL3193785 | CN(C)c1ccc(cc1)\N=C/2\C(=C(C#N)C(=O)N(C)C2=O)C                                                                       | 4768 | nM |
| CHEMBL1350637 | CC1CCN(Cc2c(O)ccc3C(=O)\C(=C\c4occc4)\Oc23)CC1                                                                       | 4794 | nM |
| CHEMBL1409184 | CC(=O)NN1C(=S)S\C(=C\c2oc(Br)cc2)\C1=O                                                                               | 4816 | nM |
| CHEMBL1586235 | BrC1CCc2c(sc3N=C4CCCCCN4C(=O)c23)C1=O                                                                                | 4818 | nM |
| CHEMBL210208  | OC1=C2Oc3c(O)c(O)ccc3C(=C2C=CC1=O)c4ccccc4S(=O)(=O)O                                                                 | 4836 | nM |
| CHEMBL1340288 | BrC1=CC(=COc1=O)C(=O)N2CCc3ccccc23                                                                                   | 4842 | nM |
| CHEMBL1527832 | CC(=O)c1sc(C(=O)O)c(c2occc2)c1c3occc3                                                                                | 4862 | nM |
| CHEMBL3193134 | Oc1ccc(\C=N\NC(=O)CCN2CCN(CC2)c3ccccc3)c(O)c1O                                                                       | 4869 | nM |
| CHEMBL1406770 | COC(=O)c1ccccc1NC(=O)C2CCCC2                                                                                         | 4920 | nM |
| CHEMBL1414222 | CC(C)C1Nc2ccc(cc2C3C=CCC13)C(=O)O                                                                                    | 4932 | nM |
| CHEMBL1527095 | Oc1nc(cc(c2occc2)c1C#N)c3ccccc3                                                                                      | 5005 | nM |
| CHEMBL1459161 | O=C(N1CCCc2ccccc12)C3=COc(=O)C=C3                                                                                    | 5018 | nM |
| CHEMBL1537686 | O=C1N(C2CCS(=O)(=O)C2)C(=S)S/C/1=C\c3occc3                                                                           | 5051 | nM |
| CHEMBL1431490 | O=C(CSc1nnc(c2occc2)c(n1)c3occc3)Nc4ccccc4                                                                           | 5156 | nM |
| CHEMBL3190370 | O=C1N=C2S\C(=C/c3occc3)\C(=O)N2N=C1Cc4ccccc4                                                                         | 5206 | nM |
| CHEMBL1257092 | CC(C)NC[C@@H](O)c1ccc(O)c(O)c1.OC(C(O)C(=O)O)C(=O)O                                                                  | 5209 | nM |
| CHEMBL3197320 | CCN(CC)c1ccc(\C=N\N2C(=CC(=CC2=O)C)C)cc1                                                                             | 5266 | nM |
| CHEMBL3190112 | Sc1nnc(c2ccenc2)n1\N=C\C=C\c3occc3                                                                                   | 5300 | nM |
| CHEMBL1441847 | COc1ccccc1n2c(S)nnc2c3cc([nH]n3)c4occc4                                                                              | 5362 | nM |
| CHEMBL1477510 | CCOc1ccc(cc1)N(CC(=O)NC(C)(C)C)S(=O)(=O)c2c(C)onc2C                                                                  | 5370 | nM |
| CHEMBL3193845 | CC1CCCC(=C1O)\C=N\c2ccc(C(=O)O)c(O)c2                                                                                | 5373 | nM |
| CHEMBL1613571 | CN1c2ccsc2C(=C(C(=Nc3ccc(F)c(Cl)c3)S)S1(=O)=O)O                                                                      | 5378 | nM |
| CHEMBL1566203 | Cc1oc(\C=C/2/SC(=S)N(C2=O)c3ccenc3)cc1                                                                               | 5441 | nM |
| CHEMBL1379164 | NC1=C(C#N)C(C#N)(C#N)C2CCCC(=C12)N3CCCCC3                                                                            | 5444 | nM |
| CHEMBL2132953 | CC\C(=N/c1ccc(N)cc1)/C2=C(O)C(C(=O)OC)C(C)(C)CC2=O                                                                   | 5480 | nM |
| CHEMBL1505704 | Cl.Cc1cc(c(C)n1CC=C)c2esc(N)n2                                                                                       | 5491 | nM |
| CHEMBL1502381 | Cl.COc1ccc(O)c(N)c1<br>CCN(CC)C(=O)c1ccc2NC(C3CC(Sc4ccccc4[N+](=O)[O-])C(Cl)C3c2c1)C(=O)O                            | 5503 | nM |
| CHEMBL1555752 | O=C(C1CCCO1)N2CCC3(CC2)OCCO3                                                                                         | 5544 | nM |
| CHEMBL1465392 | OC(=O)c1ccccc1n2ccccc2\C=C\[N+](=O)[O-]                                                                              | 5547 | nM |
| CHEMBL1460695 | OC(=O)c1ccccc1n2ccccc2\C=C\[N+](=O)[O-]                                                                              | 5566 | nM |
| CHEMBL3190368 | Cc1cc(\C=N\Nc2ccc(en2)[N+](=O)[O-])c(C)n1c3ccc(cc3)C(=O)O                                                            | 5575 | nM |
| CHEMBL1532547 | CC1CCCN(Cc2c(O)ccc3C(=O)\C(=C\c4occc4)\Oc23)C1                                                                       | 5598 | nM |

|               |                                                                                             |      |    |
|---------------|---------------------------------------------------------------------------------------------|------|----|
| CHEMBL3199451 | <chem>Oc1ccc(\C=N\Nc2nccs2)cc1[N+](=O)[O-]</chem>                                           | 5683 | nM |
| CHEMBL1517799 | <chem>CCCCC(=O)N1CC2(C[C@H]1C(=O)N)CC(=NO2)c3cccc(NC(=O)C(=C)C)c3</chem>                    | 5758 | nM |
| CHEMBL1415665 | <chem>Cc1oc(cc1)C2C3=C(OC(=C2C#N)N)C(=O)C=C(CO)O3</chem>                                    | 5769 | nM |
| CHEMBL1517227 | <chem>CCN1CCN(CC1)c2cc(N3CCN(CC3)C(=O)c4occc4)c5C(=O)c6cccc6c7onc2c57</chem>                | 5774 | nM |
| CHEMBL1559731 | <chem>Cc1cc(ccc1n2c(C)ccc2C)C(=O)O</chem>                                                   | 5778 | nM |
| CHEMBL2003564 | <chem>CSc1ccc(\C=N\Nc2cccc(c2)C(=O)O)cc1</chem>                                             | 5808 | nM |
| CHEMBL1419637 | <chem>CCC1=CC(=O)Oc2cc(C)c(CN3CCCC3)c(O)c12</chem>                                          | 5838 | nM |
| CHEMBL33864   | <chem>OC(=O)CCCC1CCSS1</chem>                                                               | 5891 | nM |
| CHEMBL377295  | <chem>CCOC(=O)C1=C(O)\C(=C/c2oc(CNC(=O)C(=O)Nc3cccc3)cc2)\N=C1C</chem>                      | 5896 | nM |
| CHEMBL1706619 | <chem>CC1=C(C(N2C(=N1)S\C(=C/c3occc3)\C2=O)c4oc(C)cc4)C(=O)Nc5ccc5</chem>                   | 5901 | nM |
| CHEMBL1449334 | <chem>CSc1nnc(c2occc2)c(n1)c3occc3</chem>                                                   | 6067 | nM |
| CHEMBL1548822 | <chem>FC(F)(F)c1cccc(NC(=O)c2ccc3nc(c4occc4)c(nc3c2)c5occc5)c1</chem>                       | 6072 | nM |
| CHEMBL1371637 | <chem>Cc1nc2ncccn2c1c3csc(NCc4occc4)n3</chem>                                               | 6083 | nM |
| CHEMBL1387545 | <chem>Cc1ccc(c(Br)c1)n2c(S)nnc2c3cc([nH]n3)c4occc4</chem>                                   | 6085 | nM |
| CHEMBL1340344 | <chem>NC1=NC(=O)\C(=C/c2occc2)\S1</chem>                                                    | 6087 | nM |
| CHEMBL1385808 | <chem>Cl.CN(C)[C@@H]1C2CC3Cc4c(ccc(O)c4C(=C3C(=O)[C@@]2(O)C(=C(C(=O)N)C1=O)O)O)N(C)C</chem> | 6138 | nM |
| CHEMBL1459370 | <chem>COc1ccc(cc1OC)C2=CC(c3ccc(Cl)cc3)n4ennc4N2</chem>                                     | 6187 | nM |
| CHEMBL1978236 | <chem>CN(C)c1ccc(cc1)\N=C/2\C(=C(C#N)C(=O)N(CCO)C2=O)C</chem>                               | 6234 | nM |
| CHEMBL1368432 | <chem>CCOC(=O)c1cc2cc(F)ccc2nc1C</chem>                                                     | 6243 | nM |
| CHEMBL1598935 | <chem>OC(=O)c1ccc2NC(C3CC(Sc4cccc4[N+](=O)[O-])C(Cl)C3c2c1)c5cccc(c5)[N+](=O)[O-]</chem>    | 6298 | nM |
| CHEMBL1421993 | <chem>Cc1nc2cccc2n3c(O)c(CC(=O)O)cc13</chem>                                                | 6318 | nM |
| CHEMBL1364584 | <chem>COc1ccc(NC2=NC(=O)\C(=C/C=C/c3occc3)\S2)cc1</chem>                                    | 6323 | nM |
| CHEMBL1399979 | <chem>CN(C1CCS(=O)(=O)C1)C(=O)COC(=O)c2cc(nc3cccc23)c4occc4</chem>                          | 6355 | nM |
| CHEMBL1457676 | <chem>OC(=O)c1ccc2NC(C3CC=CC3c2c1)c4ccncc4</chem>                                           | 6368 | nM |
| CHEMBL1581251 | <chem>Cc1cccc(C)c1NC(=O)CSc2nnc(c3occc3)c(n2)c4occc4</chem>                                 | 6432 | nM |
| CHEMBL1331573 | <chem>CCOC(=O)C(C(=O)OCC)c1cc(Br)c2noc3c4cccc4C(=O)c1c23</chem>                             | 6439 | nM |
| CHEMBL305978  | <chem>o1cccc1c2nc3cccc3nc2c4occc4</chem>                                                    | 6440 | nM |
| CHEMBL3192690 | <chem>Oc1cccc(\C=N\Cc2cccc2)c1O</chem>                                                      | 6464 | nM |
| CHEMBL1323674 | <chem>OC(=O)c1ccc(NN=C2C(=O)CCCC2=O)cc1</chem>                                              | 6468 | nM |
| CHEMBL1987546 | <chem>Clc1ccc(\C=N\c2c(nc3ccccn23)c4occc4)cc1</chem>                                        | 6483 | nM |
| CHEMBL1478565 | <chem>CN(C)c1c(F)c(F)c2c(C)c3cccc3nc2c1F</chem>                                             | 6507 | nM |
| CHEMBL1478395 | <chem>O=C1NC(=S)SC1=C2CCCC2</chem>                                                          | 6589 | nM |
| CHEMBL1427047 | <chem>CC(=O)c1ccc(NC(=O)CSc2nnc(c3occc3)c(n2)c4occc4)cc1</chem>                             | 6605 | nM |
| CHEMBL1574133 | <chem>Cc1onc(c2cccc2Cl)c1C(=O)NCc3occc3</chem>                                              | 6654 | nM |
| CHEMBL1432884 | <chem>CNC1=CC=CC=C(C(=O)\C=C\c2cccc2OC)C1=O</chem>                                          | 6693 | nM |
| CHEMBL1418568 | <chem>CN1CCN(CC1)C2=C(Cl)C(=O)C(=C(Cl)C2=O)c3cnc(s3)N4CCCC4</chem>                          | 6714 | nM |
| CHEMBL1571110 | <chem>Brc1ccc(cc1)C2=N\C(=C\c3occc3)\C(=O)N2</chem>                                         | 6780 | nM |
| CHEMBL1340515 | <chem>O=C1CC(=Nc2cccc2N1)\C=C\c3occc3</chem>                                                | 6837 | nM |
| CHEMBL1348345 | <chem>CCCCNC(=O)c1ccc2nc(c3occc3)c(nc2c1)c4occc4</chem>                                     | 6844 | nM |
| CHEMBL3196552 | <chem>CCC\C(=N/c1ccc(N)cc1)\C2=C(O)C(C(=O)OC)C(C)(C)CC2=O</chem>                            | 6876 | nM |
| CHEMBL1421346 | <chem>Cc1noc(\C=C\c2occc2)c1S(=O)(=O)N3CCC(CC3)C(=O)NCc4occc4</chem>                        | 6925 | nM |
| CHEMBL1981008 | <chem>CC(\N=C\c1cccc(O)c1O)c2cccc2</chem>                                                   | 6963 | nM |
| CHEMBL1408103 | <chem>COc1ccc(NC(=O)CC2Nc3cccc4cccc(NC2=O)c34)cc1</chem>                                    | 7032 | nM |
| CHEMBL1413495 | <chem>CC(C)(C)C1C\C(=C\c2occc2)\C(=O)\C(=C\c3occc3)\C1</chem>                               | 7084 | nM |
| CHEMBL1391547 | <chem>OC(=O)c1ccc2N[C@H]([C@H]3CC=C[C@H]3c2c1)c4ccccn4</chem>                               | 7096 | nM |
| CHEMBL3197343 | <chem>Oc1ccc(\C=N\NC(=O)\C(=C\c2ccc(cc2)[N+](=O)[O-</chem>                                  | 7168 | nM |

|               |                                                                           |      |    |
|---------------|---------------------------------------------------------------------------|------|----|
|               | ])\NC(=O)c3ccccc3)c(O)c1O                                                 |      |    |
| CHEMBL1509648 | Cc1oc(\C=C\C(=O)Nc2ccc(c(NC(=O)\C=C\c3oc(C)cc3)c2)[N+](=O)[O-])cc1        | 7203 | nM |
| CHEMBL1584828 | O=C(N1CCN(CC1)c2ncccn2)c3ccc4nc(c5occc5)c(nc4c3)c6occc6                   | 7279 | nM |
| CHEMBL1310375 | CCCCC1=CC2=CC(=O)C(C)(OC(=O)c3enc4ccccc4n3)C(=O)C2=CO1                    | 7297 | nM |
| CHEMBL1401798 | Clc1ccc(Cl)c(NC=C2C(=O)CC(CC2=O)c3occcc3)c1                               | 7328 | nM |
| CHEMBL1334452 | OCCNC(=O)c1ccc2nc(c3occcc3)c(nc2c1)c4occcc4                               | 7343 | nM |
| CHEMBL1584646 | NC1=C(C#N)C(C2=C(O1)\C(=C/c3occc3)\CCC2)c4cocc4                           | 7351 | nM |
| CHEMBL1429570 | CCCSC1=N\C(=C/c2oc(cc2)[N+](=O)[O-])\C(=O)S1                              | 7367 | nM |
| CHEMBL1972037 | NS(=O)(=O)c1ccc(N\N=C\c2ccc(O)c(O)c2O)c(c1)[N+](=O)[O-]                   | 7443 | nM |
| CHEMBL1370375 | COC\C=C\C1=CC2=CC(=O)C(C)(OC(=O)c3occcc3)C(=O)C2=CO1                      | 7470 | nM |
| CHEMBL1414317 | CC(=O)C1=C(C)N(CC=C)C(=S)N=C1N2CCN(CC2)c3ccccc3                           | 7511 | nM |
| CHEMBL1450458 | CC1CCCC1NC(=O)COC(=O)c2c3CC\C(=C/c4occc4)\c3nc5ccccc25                    | 7581 | nM |
| CHEMBL463175  | CC1CC(=O)c2c(O)c3c(O)cc(O)c(c4c(O)cc(O)c5c(O)c6C(=O)CC(C)Oc6cc45)c3cc2O1  | 7617 | nM |
| CHEMBL1446626 | O=C(Nc1ccccc1)c2ccc3nc(c4occcc4)c(nc3c2)c5occcc5                          | 7630 | nM |
| CHEMBL1604074 | COC(=O)C1=COC(C)C2CN3CCc4c([nH]c5ccccc45)C3CC12                           | 7634 | nM |
| CHEMBL1558113 | CCOC(=O)N1CCN(CC1)C(=O)c2ccc3c(SCC(=O)O)c4CCCCc4nc3c2                     | 7654 | nM |
| CHEMBL371627  | NCCCC[C@H](COC(=O)N)NC(=O)CN(CCCCN)C(=O)OC[C@H](N)CCC\N=C/1\C(=C(O)C1=N)O | 7699 | nM |
| CHEMBL1500600 | CC(=O)c1ccc(NC(=O)c2ccc3nc(c4occcc4)c(nc3c2)c5occcc5)cc1                  | 7730 | nM |
| CHEMBL1539325 | CC1(C)CCCN(C1)C(=O)C2=COC(=O)C(=C2)Br                                     | 7768 | nM |
| CHEMBL1346055 | OC(=O)c1ccc(cc1)n2ccccc2\C=C/3\NC(=O)N(C3=O)c4ccccc(Cl)c4                 | 7846 | nM |
| CHEMBL1981770 | CCOC(=O)C1=C(N)N2C(=O)\C(=C\c3occcc3)\SC2=C(C1c4occcc4)C(=O)OCC           | 7852 | nM |
| CHEMBL1423852 | O=C(\C=C\c1occc1)N(c2cccn2)c3cccn3                                        | 7904 | nM |
| CHEMBL1387355 | O=C(CCCN1C(=S)S\C(=C\c2occc2)\C1=O)Nc3cccc4ccccc34                        | 7924 | nM |
| CHEMBL3191622 | CN1\C(=N/c2ccccc2)C(=O)O)\S\C(=C/c3occcc3)\C1=O                           | 7933 | nM |
| CHEMBL1338027 | CNC1=CC=C(Br)C=C(C(=O)\C=C\c2ccccc2)OC2OC)C1=O                            | 7998 | nM |
| CHEMBL1432333 | O=C(NC(=S)Nc1ccccc1)S(=O)(=O)NC2=NCCC2)c3cc(nc4ccccc34)c5occcc5           | 8036 | nM |
| CHEMBL1507308 | CCNC(=O)COC(=O)c1cc(nc2ccccc12)c3occcc3                                   | 8092 | nM |
| CHEMBL1358059 | COC\C=C\C1=CC2=CC(=O)C(C)(OC(=O)CCC(=O)OC)C(=O)C2=CO1                     | 8103 | nM |
| CHEMBL3190665 | COc1ccc(\C=N\c2c(nc3cccn23)c4occcc4)cc1OC                                 | 8154 | nM |
| CHEMBL3192197 | O=C(Cc1cccs1)N\N=C\C=C\c2occc2                                            | 8220 | nM |
| CHEMBL3191661 | C\C(=C/c1occc1)\C=N\2c(S)mnc2c3ccncc3                                     | 8220 | nM |
| CHEMBL1378817 | O=C1C2C3CCCC3=C4CCCC4C2C(=O)N1c5ccccc5                                    | 8279 | nM |
| CHEMBL1342716 | CCOC(=O)COc1nc(cc(c2occc2)c1C#N)c3occcc3                                  | 8336 | nM |
| CHEMBL1532407 | Sc1nc2CCCCc2c(c3occcc3)c1C#N                                              | 8343 | nM |
| CHEMBL3197060 | CN(C)c1ccc(cc1)\N=C/2\C(=C(C#N)C(=O)N(CCCO)C2=O)C                         | 8435 | nM |
| CHEMBL1348610 | [O-][n+]1c2CCCCc2[n+](O)c3cc(Br)ccc13                                     | 8442 | nM |
| CHEMBL2007057 | Br\C(=C/c1ccccc1)\C=N\NC(=O)c2cc([nH]n2)c3occcc3                          | 8533 | nM |
| CHEMBL1417070 | Cc1c(Cl)cccc1NS(=O)(=O)c2ccc3NC(C4CC=CC4c3c2)c5ccc(cc5)C(=O)O             | 8536 | nM |
| CHEMBL504791  | Oc1ccc(cc1)\N=C\c2ccc(s2)c3cccs3                                          | 8645 | nM |
| CHEMBL1389990 | C\C(=C/c1occc1)\C=C/2\SC(=S)N(CC(=O)O)C2=O                                | 8804 | nM |
| CHEMBL1406195 | Oc1ccc(cc1O)C(=O)CSc2nc3ccccc3n2CCc4ccccc4                                | 8815 | nM |
| CHEMBL1516515 | Cc1nn(c2CCC(Br)C(=O)c12)c3cccn3                                           | 8819 | nM |
| CHEMBL1255778 | Cl.NC(CO)C(=O)NNCc1ccc(O)c(O)c1O                                          | 8835 | nM |
| CHEMBL1305385 | Cc1ccccc1NC(=O)c2c(C)nc(S)c(C#N)c2c3occcc3                                | 8909 | nM |
| CHEMBL1410381 | Oc1c(cc(CN2CCCC2)c3cccn13)[N+](=O)[O-]                                    | 8940 | nM |

|               |                                                                                                                                                                     |       |    |
|---------------|---------------------------------------------------------------------------------------------------------------------------------------------------------------------|-------|----|
| CHEMBL1570659 | <chem>OC(=O)C1Nc2c(cccc2C(=O)N3CCOCC3)C4C=CCC14</chem>                                                                                                              | 8990  | nM |
| CHEMBL1311222 | <chem>COc1cc(CN(C(=O)c2occc2)c3ccc(C)cc3)ccc1O</chem>                                                                                                               | 9048  | nM |
| CHEMBL1723399 | <chem>COc1cccc(CNC(=O)CCNS(=O)(=O)c2cccs2)c1</chem>                                                                                                                 | 9048  | nM |
| CHEMBL1380684 | <chem>Cl.CN1CCc2ccccc3c2[C@@H]1Cc4ccc(O)c(O)c34</chem>                                                                                                              | 9078  | nM |
| CHEMBL212827  | <chem>Cc1ccc(C)n1c2ccc(cc2)C(=O)O</chem>                                                                                                                            | 9092  | nM |
| CHEMBL1400828 | <chem>Cc1cc(C(=O)COC(=O)c2cc(O)c3ccccc3c2O)c(C)n1CC4CCCO4</chem>                                                                                                    | 9140  | nM |
| CHEMBL1463326 | <chem>CNC1=CC=C(Br)C=C(C(=O)\C=C\c2ccc(OC)cc2)C1=O</chem>                                                                                                           | 9153  | nM |
| CHEMBL1501573 | <chem>BrC1cccc(c1)C2=N\C(C=C/c3occc3)\C(=O)N2</chem>                                                                                                                | 9199  | nM |
| CHEMBL1427289 | <chem>O=C(NC1CC1)c2cc(nc3ccccc23)c4occc4</chem>                                                                                                                     | 9273  | nM |
| CHEMBL1604163 | <chem>o1cccc1\C=C\c2ccc3ccccc3n2</chem>                                                                                                                             | 9388  | nM |
| CHEMBL1342736 | <chem>CSc1nc(NCCOCCO)c2sc3nc(c4CCcC4c3c2n1)c5occc5</chem>                                                                                                           | 9422  | nM |
| CHEMBL1522155 | <chem>NS(=O)(=O)c1ccc(cc1)N=Nc2nc(O)c(O)c2</chem>                                                                                                                   | 9469  | nM |
| CHEMBL1416382 | <chem>CN=C1C=CC(=CC(=C1O)C(=O)\C=C\c2ccc(Cl)cc2Cl)Br</chem>                                                                                                         | 9564  | nM |
| CHEMBL1408802 | <chem>Clc1cc(Cl)cc(NC=C2C(=O)CC(CC2=O)c3occc3)c1</chem>                                                                                                             | 9578  | nM |
| CHEMBL1576254 | <chem>Cl.Nc1ccc(cc1)N(CCO)CCO</chem>                                                                                                                                | 9623  | nM |
| CHEMBL1463595 | <chem>O=C1N(C(=S)S/C1=C/c2occc2)c3ccccc3</chem>                                                                                                                     | 9641  | nM |
| CHEMBL1301164 | <chem>CNC1=CC=C(Br)C=C(C(=O)\C=C\c2cc(OC)ccc2OC)C1=O</chem>                                                                                                         | 9748  | nM |
| CHEMBL1981675 | <chem>CCOC(=O)C1=C(N)N2C(=O)\C(=C/c3occc3)\SC2=C(C1c4occc4)C(=O)OC</chem>                                                                                           | 9783  | nM |
| CHEMBL1445785 | <chem>Cl.COc1cc(CNCCc2ccc(F)cc2)ccc1OCc3ccc(Cl)nc3</chem>                                                                                                           | 9799  | nM |
| CHEMBL1339797 | <chem>CC1=CC2=C(C(C(=C(N)O2)C#N)c3oc(cc3)[N+](=O)[O-])C(=O)O1</chem>                                                                                                | 9958  | nM |
| CHEMBL1543190 | <chem>NS(=O)(=O)c1ccc2NC(C3CCC=CC3)C4CC=CC4c2c1</chem>                                                                                                              | 9982  | nM |
| CHEMBL1300569 | <chem>CN(C)c1ccc(cc1)N2C(=O)CC(Nc3ccc(cc3)N4CCOCC4)C2=O</chem>                                                                                                      | 9991  | nM |
| CHEMBL1364109 | <chem>CC1Cc2ccccc2N1CC3=CC(=O)N4C=CSC4=N3</chem>                                                                                                                    | 10044 | nM |
| CHEMBL1509350 | <chem>COc1cccc(c1)n2c(Cc3cc(O)nc(O)n3)nnc2SCC(=O)NC4CCCC4</chem>                                                                                                    | 10125 | nM |
| CHEMBL1382279 | <chem>CCNC1=CC=C(Br)C=C(C(=O)\C=C\c2ccc(OCC)cc2)C1=O</chem>                                                                                                         | 10157 | nM |
| CHEMBL1980184 | <chem>O=C(N\N=C\C=C\c1occc1)c2ccncc2</chem>                                                                                                                         | 10178 | nM |
| CHEMBL1341340 | <chem>OC(COc1ccc(cc1)S(=O)(=O)N2CCOCC2)CN3CCC(Cc4ccccc4)CC3</chem>                                                                                                  | 10328 | nM |
| CHEMBL3198038 | <chem>C\C(=N/c1ccccc(O)c1)\C=C(/O)\c2ccc(C)cc2</chem>                                                                                                               | 10369 | nM |
| CHEMBL1428997 | <chem>CS(=O)(=O)c1ccc2N3C(=NC(=O)\C(=C\c4occc4)\C3=N)Sc2c1</chem>                                                                                                   | 10374 | nM |
| CHEMBL3195505 | <chem>o1cccc1\C=C\C=N\nc2nncc2</chem>                                                                                                                               | 10410 | nM |
| CHEMBL1526580 | <chem>CC(=O)Oc1cccc(c1)N2C(=O)CC(Nc3ccc(cc3)N4CCOCC4)C2=O</chem>                                                                                                    | 10460 | nM |
| CHEMBL1453783 | <chem>COC\C=C\C1=CC2=CC(=O)C(C)(OC(=O)C3CCCC3)C(=O)C2=CO1</chem>                                                                                                    | 10521 | nM |
| CHEMBL3193859 | <chem>C\C(=C\c1occc1)\C=N\NC(=O)Cc2cccn2C</chem>                                                                                                                    | 10699 | nM |
| CHEMBL1337304 | <chem>[O-][N+](=O)c1ccc(\C=C/2\C(=O)NC(=O)N(C2=O)c3ccccc3)s1</chem>                                                                                                 | 10713 | nM |
| CHEMBL1352170 | <chem>CN1N(C(=O)C(=C1C)N=C2C=C(Br)C(=O)C(=C2)Br)c3ccccc3</chem>                                                                                                     | 10962 | nM |
| CHEMBL47986   | <chem>Oc1ccc(O)c(\C=C\NC=O)c1</chem>                                                                                                                                | 10970 | nM |
| CHEMBL1334633 | <chem>CCOC(=O)c1ccc2NC(C3CC=CC3c2c1)C(=O)O</chem>                                                                                                                   | 10981 | nM |
| CHEMBL1414652 | <chem>COc1ccc2C(=NN(C)c3ccccc1c23)C</chem>                                                                                                                          | 11063 | nM |
| CHEMBL1360529 | <chem>COC(=O)CCC(=O)OC1(C)C(=O)C=C2C=C3CCCN3C=C2C1=O</chem>                                                                                                         | 11100 | nM |
| CHEMBL1579407 | <chem>[O-][n+ ]1c2CCCCc2[n+ ]([O-])c3cc(F)c(F)cc13</chem>                                                                                                           | 11139 | nM |
| CHEMBL1478258 | <chem>COC(=O)c1oc(CC(=O)c2c(C)cc(O)cc2O)cc1</chem>                                                                                                                  | 11178 | nM |
| CHEMBL1547446 | <chem>CN1C(=S)NC(=O)\C(=C/C=C/c2occc2)\C1=O</chem>                                                                                                                  | 11218 | nM |
| CHEMBL1604283 | <chem>CO[C@H]1C=CO[C@@]2(C)Oc3c(C)c(O)c4c(O)c(NC(=O)C(=CC=C[C@H](C)[C@H](O)[C@@H](C)[C@@H](O)[C@@H](C)[C@H](OC(=O)C)[C@@H]1C)C)c(C=NN5CCN(C)CC5)c(O)c4c3C2=O</chem> | 11234 | nM |
| CHEMBL1546048 | <chem>OC(=O)CC(N1C(=S)S\C(=C/c2oc(cc2)c3nc4ccccc4s3)\C1=O)C(=O)O</chem>                                                                                             | 11286 | nM |
| CHEMBL1528757 | <chem>Nc1cc(N)c(OCC(F)(F)F)cc1OCC(F)(F)F</chem>                                                                                                                     | 11389 | nM |
| CHEMBL1330585 | <chem>O=C1CC(Nc2ccc(cc2)N3CCOCC3)C(=O)N1C4CCCCC4</chem>                                                                                                             | 11573 | nM |
| CHEMBL1974521 | <chem>O=C(N\N=C\C=C\c1occc1)c2cccs2</chem>                                                                                                                          | 11607 | nM |
| CHEMBL1479103 | <chem>Oc1cc2CC3(O)COc4c(O)c(O)ccc4C3c2cc1O</chem>                                                                                                                   | 11696 | nM |

|               |                                                                                                            |       |    |
|---------------|------------------------------------------------------------------------------------------------------------|-------|----|
| CHEMBL6640    | NCCc1c[nH]c2ccccc12                                                                                        | 11752 | nM |
| CHEMBL601952  | Cl.Nc1ccc(cc1)N2CCCCC2                                                                                     | 11781 | nM |
| CHEMBL1256958 | CNC[C@H](O)c1ccc(O)c(O)c1.OC(C(O)C(=O)O)C(=O)O<br>CC1=CC=CN2C(=O)C3=C(N=C12)N(CCc4ccccc4)C(=N)C(=C3)C(=O)  | 11807 | nM |
| CHEMBL605747  | )NCc5occc5                                                                                                 | 11809 | nM |
| CHEMBL1468476 | CN1C(=O)\C(=C/NNe2ccc(C)c(C)c2)\C(=C(C#N)C1=O)C                                                            | 11852 | nM |
| CHEMBL1442048 | O=C1N=C(S/C/1=C\c2occc2)N3CCN(CC3)c4ccccc4                                                                 | 11857 | nM |
| CHEMBL1407274 | O=C1OC(=Nc2sc3CCc3c12)\C=C\c4occc4                                                                         | 11917 | nM |
| CHEMBL1609186 | NC(=O)\C(=C\c1occc1)\C(=S)N                                                                                | 12031 | nM |
| CHEMBL1373655 | CC1=NN(C(=O)/C/1=C\C=C\c2occc2)c3cccc(c3)C(=O)O                                                            | 12042 | nM |
| CHEMBL1446904 | Cc1cc(C)c(C(=O)\C=C\c2occc2)c(O)n1                                                                         | 12134 | nM |
| CHEMBL1412282 | OC(=O)CSc1c2CCCCc2nc3cc(ccc13)C(=O)N4CCOCC4<br>COc1cccc(C2C(=C(N)OC3=C2C(=O)CC(C3)c4occc4)C#N)c1OCc5ccc    | 12165 | nM |
| CHEMBL1425000 | (F)cc5                                                                                                     | 12209 | nM |
| CHEMBL1486503 | CC1=CN2C(=NC(=O)\C(=C/c3oc(cc3)[N+](=O)[O-])\C2=N)S1                                                       | 12235 | nM |
| CHEMBL1601846 | OC1=CC2=C(OC1=O)c3c(O)c(O)c(O)cc3C(=O)O2                                                                   | 12259 | nM |
| CHEMBL1412617 | COc1ccc(N2C(=O)CC(Nc3ccc(cc3)N4CCOCC4)C2=O)c(OC)c1                                                         | 12371 | nM |
| CHEMBL1716317 | Oc1cc(cc2cc(Nc3ccccc3)ccc12)S(=O)(=O)O                                                                     | 12487 | nM |
| CHEMBL1488898 | CCN=C1C=CC(=CC(=C1O)C(=O)\C=C\c2ccc(Cl)cc2)Br                                                              | 12533 | nM |
| CHEMBL1508080 | CCC1C\C(=C\c2occc2)\C(=O)\C(=C\c3occc3)\C1                                                                 | 12553 | nM |
| CHEMBL1560617 | Cn1nc(c2ccc(Cl)cc2)c3cc(sc13)C(=O)N4CCN(CC4)c5ccccc5                                                       | 12597 | nM |
| CHEMBL1340633 | COc1cc(ccc1Nc2ccccc2C(=O)O)c3ccc(Nc4ccccc4C(=O)O)c(OC)c3                                                   | 12655 | nM |
| CHEMBL1349278 | CCc1cc(O)n2nc(C)c(c3ccccc3OC)c2n1                                                                          | 12721 | nM |
| CHEMBL1568791 | Fe1ccccc1N2C(=O)CC(Nc3ccc(cc3)N4CCOCC4)C2=O                                                                | 12854 | nM |
| CHEMBL3194876 | Oc1ccc(\C=N\NC(=S)Nc2ccnc2)c(O)c1O<br>COC(=O)CCC(=O)OC1(C)C(=O)C(=C2C=C(OC=C2C1=O)c3ccc(OC)                | 12905 | nM |
| CHEMBL1523510 | cc3)Br                                                                                                     | 13025 | nM |
| CHEMBL1586096 | COc1cc(cc(OC)c1O)C2Nc3cccc4cccc(N2)c34                                                                     | 13117 | nM |
| CHEMBL1712631 | Cc1nc2C(=O)NC(=S)Nc2nc1O                                                                                   | 13177 | nM |
| CHEMBL1408143 | OC(=O)c1c2CCCc2nc3ccc(Cl)cc13                                                                              | 13210 | nM |
| CHEMBL3196071 | Oc1c(\C=N\Cc2ccnc2)c3c4CCCCc4oc3cc1[N+](=O)[O-]                                                            | 13357 | nM |
| CHEMBL1982713 | Cc1oc(\C=C\2/Sc3nc(nn3C2=O)c4cccs4)cc1                                                                     | 13568 | nM |
| CHEMBL1452185 | OC(=O)c1cccc(NN=C2C(=O)CCCC2=O)c1                                                                          | 13660 | nM |
| CHEMBL1415169 | CC(=O)N1CCN(CC1)c2ccc(NC3ccccc3)cc2                                                                        | 13679 | nM |
| CHEMBL1341061 | COc1ccc(N=C(S)NCCc2ccccc2OC)c(OC)c1                                                                        | 13703 | nM |
| CHEMBL1430005 | O.C[n+ ]1cccc2cccc([O-])c12                                                                                | 13712 | nM |
| CHEMBL2007178 | OC(=O)c1ccc(cc1)n2ccccc2\C=N/NC(=O)c3oc4ccc(Br)cc4c3                                                       | 13827 | nM |
| CHEMBL1991599 | Oc1ccc(\C=N\N2CCOCC2)c(O)c1O                                                                               | 14003 | nM |
| CHEMBL1569952 | CCOC(=O)N1CCN(CC1)c2ccc(O)cc2                                                                              | 14028 | nM |
| CHEMBL1423121 | CCN(CC(=O)Nc1c([nH]c2ccccc12)C(=O)OC)c3ccc4OCOc4c3<br>CC[C@H](C)\C=C/C\C=C\C1=CC2=CC(=O)[C@ ]3(C)OC(=O)[C@ | 14279 | nM |
| CHEMBL1570323 | H]([C@ @H]3C2=CO1)C(=O)C                                                                                   | 14355 | nM |
| CHEMBL3190976 | CN1N(C(=O)C(=C1C)\N=C\2/C=CC(=O)C(=C2)C)c3ccccc3                                                           | 14504 | nM |
| CHEMBL1313956 | Clc1ccccc1OCC(=O)c2ccc[nH]2                                                                                | 14626 | nM |
| CHEMBL1403497 | O=C1CC(=O)N(Cc2occc2)C(=O)N1                                                                               | 14648 | nM |
| CHEMBL3189657 | Oc1ccc(\C=N\N2C(=O)c3ccccc3C2=O)c(O)c1O                                                                    | 14745 | nM |
| CHEMBL1342528 | CCOc1cc(N2CCOCC2)c(OCC)cc1NS(=O)(=O)c3ccc(Cl)s3                                                            | 14902 | nM |
| CHEMBL1543330 | CCC1S\C(=C/C#N)\C(=O)NCc2occc2)\N(C1=O)c3ccc(F)cc3                                                         | 14916 | nM |
| CHEMBL1093246 | Oc1ccc(cc1)\N=C\c2ccc(O)c(O)c2                                                                             | 14957 | nM |
| CHEMBL1981446 | Oc1cc(O)cc(c1)C(=O)N\N=C\c2cn(Cc3ccccc3)c3c4ccccc24                                                        | 14961 | nM |
| CHEMBL1402539 | [Br-].Cc1ccccc2cc(c3ccccc3)c(c[n+ ]12)c4ccccc4                                                             | 14969 | nM |

|               |                                                                                           |       |    |
|---------------|-------------------------------------------------------------------------------------------|-------|----|
| CHEMBL1562537 | <chem>Fc1cccc1NC(=O)C2=COC(=O)C(=C2)Br</chem>                                             | 14985 | nM |
| CHEMBL1546136 | <chem>Cc1cccc(NC(=O)CSc2nnc(c3occc3)c(n2)c4occc4)c1C</chem>                               | 15030 | nM |
| CHEMBL1577453 | <chem>COc1ccc(cc1)c2cc(nc(O)c2C#N)c3occc3</chem>                                          | 15075 | nM |
| CHEMBL1457755 | <chem>CCOC(=O)N1CC=C2[C@H](C1)[C@@H](c3cccs3)C(C#N)(C#N)C(=C2C#N)N</chem>                 | 15255 | nM |
| CHEMBL1304584 | <chem>CC1=CC(C)(C)Nc2ccc(OC(=O)CN3C(=O)c4cccc5cccc(C3=O)c45)cc12</chem>                   | 15289 | nM |
| CHEMBL3191022 | <chem>CCn1c(C)nc2cc(ccc12)C(=O)N\N=C\c3ccc(O)c(O)c3O</chem>                               | 15294 | nM |
| CHEMBL1584173 | <chem>OC(=O)\C(=C\c1occc1)\NC(=O)c2ccccc2</chem>                                          | 15314 | nM |
| CHEMBL1308302 | <chem>CN(C)N1C(=C(C#N)C(C2=C1CCCC2=O)c3ccccc3)N</chem>                                    | 15324 | nM |
| CHEMBL383041  | <chem>O=C1CC(Nc2ccc(cc2)N3CCOCC3)C(=O)N1Cc4cccc4</chem>                                   | 15440 | nM |
| CHEMBL1340051 | <chem>NC(=O)CN1C(=O)N(Cc2occc2)C(=O)c3c4CCCCc4sc13</chem>                                 | 15488 | nM |
| CHEMBL3210868 | <chem>C\C(=N/Nc1ccc(cc1[N+](=O)[O-])[N+](=O)[O-])\C2=Cc3c(OC2=O)ccc4ccccc34</chem>        | 15623 | nM |
| CHEMBL1561729 | <chem>OC(=O)c1ccc(cc1)n2cccc2\C=C/3\NC(=O)N(C3=O)c4ccccc4</chem>                          | 15662 | nM |
| CHEMBL1448387 | <chem>Oc1cc2C[C@]3(O)COc4c(O)c(O)ccc4[C@@H]3c2cc1O</chem>                                 | 15711 | nM |
| CHEMBL1562824 | <chem>Oc1c(cc(CN2CCOCC2)c3ccccc13)[N+](=O)[O-]</chem>                                     | 15777 | nM |
| CHEMBL2028186 | <chem>[Na+].[Na+].Oc1ccc(Cl)cc1N=Nc2c(O)c3c(O)cc(cc3cc2S(=O)(=O)[O-])S(=O)(=O)[O-]</chem> | 15919 | nM |
| CHEMBL1580335 | <chem>Cc1oc(\C=C\C(=O)Nc2ncc(C)s2)cc1</chem>                                              | 15966 | nM |
| CHEMBL1449261 | <chem>CC(C)N1C(=O)CC(Nc2ccc(cc2)N3CCOCC3)C1=O</chem>                                      | 16015 | nM |
| CHEMBL1303019 | <chem>NC(=S)\C(=C/c1oc(Br)cc1)\C#N</chem>                                                 | 16044 | nM |
| CHEMBL1723023 | <chem>O=C1N(C(=S)N/C/1=C/c2occc2)c3ccccc3</chem>                                          | 16122 | nM |
| CHEMBL1420119 | <chem>CCOC(=O)c1sc2nc(CC(=O)OC)nc(NCc3occc3)c2c1C</chem>                                  | 16139 | nM |
| CHEMBL1328733 | <chem>O=C1NC(=S)N(C(=O)/C/1=C/c2occc2)c3ccccc3</chem>                                     | 16200 | nM |
| CHEMBL1711538 | <chem>Cc1ccc(NC(=O)COc2ccc(\C=N\NC(=O)CSc3ccccc3)cc2)cc1</chem>                           | 16288 | nM |
| CHEMBL1455912 | <chem>CCOc1ccccc1N2C(=O)CC(Nc3ccc(cc3)N4CCOCC4)C2=O</chem>                                | 16336 | nM |
| CHEMBL1464373 | <chem>O=C(COC(=O)c1ccc(NS(=O)(=O)c2cccs2)cc1)NCc3occc3</chem>                             | 16369 | nM |
| CHEMBL1525725 | <chem>FC(F)(F)c1cc(NC(=O)CCCCN2C(=O)CCC2=O)ccc1C1</chem>                                  | 16378 | nM |
| CHEMBL523200  | <chem>[O-][N+](=O)c1ccc(Sc2oc3ccccc3n2)c(c1)[N+](=O)[O-]</chem>                           | 16429 | nM |
| CHEMBL1486335 | <chem>OCCCNc1cc(SCc2occc2)c3nonc3c1[N+](=O)[O-]</chem>                                    | 16538 | nM |
| CHEMBL1497208 | <chem>C1C1=C(N2CCOCC2)C(=O)N(C1=O)c3ccccc3</chem>                                         | 16572 | nM |
| CHEMBL1348852 | <chem>Cc1cc(c(C)n1Cc2occc2)c3csc(NC(=O)c4ccc(cc4)C#N)n3</chem>                            | 16658 | nM |
| CHEMBL3196993 | <chem>Oc1ccc(\C=N\NC(=O)Cc2csc(n2)N3CCOCC3)c(O)c1O</chem>                                 | 16715 | nM |
| CHEMBL1531750 | <chem>CCCC1=CC(=O)Oc2cc(C)c(CN3CCCC3)c(O)c12</chem>                                       | 16949 | nM |
| CHEMBL518575  | <chem>Cn1cccc1\C=C\2/CCC\C(=C/c3cccn3C)\C2=O</chem>                                       | 17045 | nM |
| CHEMBL3194107 | <chem>CN1C(=O)N(C)c2nnc(CC(=O)N\N=C\C(=O)c3occc3)c2C1=O</chem>                            | 17128 | nM |
| CHEMBL1509377 | <chem>CC(=C)C(=O)Nc1cccc(c1)C2=NOC3(C[C@@H](N(C3)C(=O)COc4cc(c(Cl)cc4)C(=O)N)C2</chem>    | 17335 | nM |
| CHEMBL1359359 | <chem>CNCc1ccccc1Se2cc(O)ccc2O.OC(=O)\C=C/C(=O)O</chem>                                   | 17504 | nM |
| CHEMBL1533230 | <chem>CC(C)(CS(=O)(=O)[O-])NC(=O)CC[N+](C)(C)CCO</chem>                                   | 17509 | nM |
| CHEMBL1605099 | <chem>O=C1N(Cc2ccccc2)C(=S)S/C/1=C/c3occc3</chem>                                         | 17542 | nM |
| CHEMBL1425725 | <chem>COc1ccccc1N2C(=O)NC(=O)\C(=C\c3ccc(s3)[N+](=O)[O-])\C2=O</chem>                     | 17553 | nM |
| CHEMBL1449846 | <chem>Cc1sc2nenc(SCc3occc3)c2c1C</chem>                                                   | 17604 | nM |
| CHEMBL1446502 | <chem>CCCCNC(=O)CSC1=Nc2sec(c3occc3)c2C(=O)N1CC=C</chem>                                  | 17774 | nM |
| CHEMBL1598904 | <chem>Cc1ccc(cc1)c2ccc(CCC(=O)O)n2N=C(N)S</chem>                                          | 17820 | nM |
| CHEMBL1381017 | <chem>CC1=NNC(=S)N(NC(=O)\C=C\C(=O)NN2C(=S)NN=C(C)C2=O)C1=O</chem>                        | 18161 | nM |
| CHEMBL567531  | <chem>O=C(COC(=O)c1cc(nc2ccccc12)c3occc3)NCc4ccc5OCOc5c4</chem>                           | 18179 | nM |
| CHEMBL3191675 | <chem>CC\C(=N/c1ccc(O)cc1)\C=C(/O)\c2ccncc2</chem>                                        | 18275 | nM |
| CHEMBL1560775 | <chem>Oc1ccc(NC2=NC(=O)\C(=C\C=C\c3occc3)\S2)cc1</chem>                                   | 18287 | nM |
| CHEMBL1599175 | <chem>N=C1S\C(=C/c2occc2)\C(=O)N1c3ccc4OCOc4c3</chem>                                     | 18390 | nM |

|               |                                                                                      |       |    |
|---------------|--------------------------------------------------------------------------------------|-------|----|
| CHEMBL1501577 | <chem>COC(=O)c1ccccc1NC(=O)CCS(=O)(=O)c2ccc(Br)cc2</chem>                            | 18402 | nM |
| CHEMBL3189351 | <chem>Cc1cc([nH]n1)c2nnc(S)n2\N=C\C=C\c3occc3</chem>                                 | 18553 | nM |
| CHEMBL1384137 | <chem>CCOC1=CC=CC(=O)c2c(C)n(CC(=O)c3ccccc3)c(C)c12</chem>                           | 18607 | nM |
| CHEMBL1301589 | <chem>O=C(N1CCN(CC1)c2ccccc2)c3cc(on3)c4occc4</chem>                                 | 18614 | nM |
| CHEMBL1446243 | <chem>COc1ccc(CCN2C(=O)CC(Nc3ccc(cc3)N4CCOCC4)C2=O)cc1OC</chem>                      | 18846 | nM |
| CHEMBL1562928 | <chem>Oc1cc(c2CCc2n1)c3ccccc3Cl</chem>                                               | 18847 | nM |
| CHEMBL1256708 | <chem>O.Cl.CN1CCc2cccc3c2[C@H]1Cc4ccc(O)c(O)c34</chem>                               | 19071 | nM |
| CHEMBL1349676 | <chem>COC(=O)CCC(=O)OC1(C)C(=O)C(=C2C=C(N(CCCOC(C)C)C)=C2C1=O)c3ccc(OC)cc3)Br</chem> | 19073 | nM |
| CHEMBL1493191 | <chem>Oc1ccc(cc1)N2C(=S)S\C=C/C=C/c3occc3\C2=O</chem>                                | 19113 | nM |
| CHEMBL1706454 | <chem>Cl.OCCN1CCN(CC1)C2=C(Cl)C(=O)c3c(O)ccc(O)c3C2=O</chem>                         | 19262 | nM |
| CHEMBL1402286 | <chem>COc1ccc(NC(=O)c2cc(nc3ccccc23)c4occc4)cc1S(=O)(=O)N5CCOCC5</chem>              | 19303 | nM |
| CHEMBL1730401 | <chem>Nc1cccc2c(O)cc(cc12)S(=O)(=O)O</chem>                                          | 19312 | nM |
| CHEMBL179024  | <chem>Cc1oc(cc1)C(=O)Nc2ccc(O)c(c2)C(=O)O</chem>                                     | 19380 | nM |
| CHEMBL117966  | <chem>[O-][N+](=O)c1oc(\C=C/C#N)\c2nc3ccccc3[nH]2)cc1</chem>                         | 19583 | nM |
| CHEMBL1336400 | <chem>O=C1CCC/C1=C/Nc2ccc3OCOc3c2</chem>                                             | 19679 | nM |
| CHEMBL1526514 | <chem>COc1ccccc1N2C(=O)CC(Nc3ccc(cc3)N4CCOCC4)C2=O</chem>                            | 20063 | nM |
| CHEMBL1575100 | <chem>Cc1cccc(NC(=S)NC(=O)\C=C\c2occc2)c1</chem>                                     | 20153 | nM |
| CHEMBL1510832 | <chem>FC(F)(F)c1cnc(NC(=O)COC(=O)\C=C\c2occc2)c(Cl)c1</chem>                         | 20166 | nM |
| CHEMBL1417290 | <chem>CCN(CC)c1ccc2OC(=O)C(=Nc2c1)C</chem>                                           | 20244 | nM |
| CHEMBL1364651 | <chem>CN1N(C(=O)C(=C1C)n2c(C)cc(C(=O)CCl)c2C)c3ccccc3</chem>                         | 20310 | nM |
| CHEMBL1505471 | <chem>COC(=O)c1ccc(O)c2nc3c(C=O)c(O)cc(O)c3nc12</chem>                               | 20342 | nM |
| CHEMBL1271266 | <chem>Oc1cc(cc2ccc(Nc3ccccc3)cc12)S(=O)(=O)O</chem>                                  | 20505 | nM |
| CHEMBL1996233 | <chem>OC1=C(\C=N\c2cc(Cl)ccc2O)C(=O)CC(Cl)c3occc3</chem>                             | 20511 | nM |
| CHEMBL1473059 | <chem>[O-][N+](=O)c1cnc(NC(=O)COC(=O)c2ccccc2)s1</chem>                              | 20534 | nM |
| CHEMBL1566010 | <chem>Cc1oc(cc1)c2c3CCCCc3nc(S)c2C#N</chem>                                          | 21214 | nM |
| CHEMBL1437977 | <chem>Cc1ccn2cc(cc2c1)c3nonc3C</chem>                                                | 21370 | nM |
| CHEMBL1992547 | <chem>C\C(=N/Nc1ccc(Cl)c(c1)C(=O)O)\c2ccc[nH]2</chem>                                | 21390 | nM |
| CHEMBL1569992 | <chem>CC(=C)C(=O)Nc1ccc2OCCOCCOCCOc2c1</chem>                                        | 21624 | nM |
| CHEMBL1421172 | <chem>CCCCN1C(=S)NC(=O)\C(=C/C=C/c2occc2)\C1=O</chem>                                | 21699 | nM |
| CHEMBL1571597 | <chem>CNe1c(ccc2C(=O)c3ccccc3C(=O)c12)C(=O)O</chem>                                  | 21860 | nM |
| CHEMBL1508001 | <chem>Cc1ccc[n+](c1)C2=C(SC(=O)[N-]2)C=NNC(=O)c3ccccc3O</chem>                       | 22059 | nM |
| CHEMBL1346425 | <chem>Fc1ccc(CN2CCNC(=O)C2CC(=O)NCCN3CCCc4ccccc34)cc1</chem>                         | 22113 | nM |
| CHEMBL1452551 | <chem>COC\C=C\C1=CC2=CC(=O)C(C)(OC(=O)c3cnc4ccccc4n3)C(=O)C2=CN1c5ccccc5</chem>      | 22256 | nM |
| CHEMBL1700270 | <chem>Oc1ccc(N=Nc2cc(Cl)cc(c2O)S(=O)(=O)O)c(O)c1</chem>                              | 22502 | nM |
| CHEMBL195455  | <chem>COC(=O)C1=C(O)\C(=C/c2oc(CNC(=O)C(=O)Nc3ccc(C)cc3)cc2)\N=C1C</chem>            | 22526 | nM |
| CHEMBL1519796 | <chem>CCOC1=CC=CC(=O)c2c(C)oc(C)c12</chem>                                           | 22563 | nM |
| CHEMBL1318848 | <chem>Cl.CC(C)CC(N1CCN(C)CC1)c2nmmn2CS(=O)(=O)c3ccc(C)cc3</chem>                     | 22634 | nM |
| CHEMBL1559159 | <chem>COC1=CC(=CC(=O)c2c(C)oc(C)c12)c3cccs3</chem>                                   | 22671 | nM |
| CHEMBL1342436 | <chem>CCCN=C1C(=C(O)C2=C(C(COC(=O)N)[C@]3(OC)C4NC4CN23)C1=O)C</chem>                 | 22678 | nM |
| CHEMBL1449868 | <chem>CCCCN1C(=O)c2cc(ccc2N=C1SCC(=O)NCc3occc3)N4CCOCC4</chem>                       | 22759 | nM |
| CHEMBL1611654 | <chem>Oc1ccc2OC3(CCCC3c2c1)N4CCOCC4</chem>                                           | 23136 | nM |
| CHEMBL1586339 | <chem>COc1ccc(Nc2ccc(OC)cc2)cc1</chem>                                               | 23170 | nM |
| CHEMBL1505755 | <chem>Clc1ccc(CNC(=O)CN2CCN(CC2)S(=O)(=O)c3ccc(Cl)s3)cc1</chem>                      | 23222 | nM |
| CHEMBL3192541 | <chem>CN(C)S(=O)(=O)c1ccccc(NC(=S)N\N=C\c2ccc(O)c(O)c2O)c1</chem>                    | 23245 | nM |
| CHEMBL1569215 | <chem>OC(=O)c1ccccc1)c2oc(\C=C/3\C(=O)NN(C3=O)c4ccc(Cl)cc4)cc2</chem>                | 23406 | nM |
| CHEMBL1545983 | <chem>Cc1cc2ccccc2n1CCNC(=O)C3CCCCC3</chem>                                          | 23461 | nM |
| CHEMBL1451156 | <chem>Clc1cc(Cl)cc(NC(=O)C2=COC(=O)C(=C2)Br)c1</chem>                                | 23493 | nM |

|               |                                                                                                                                                      |       |    |
|---------------|------------------------------------------------------------------------------------------------------------------------------------------------------|-------|----|
| CHEMBL1612606 | Cc1cc(cs1)C(=O)Nc2sc3CCCCCc3c2C#N                                                                                                                    | 23639 | nM |
| CHEMBL1567271 | Fe1ceccc1\C=C\2/CCCC3=C2Nc4nenn4C3c5ceccc5F                                                                                                          | 23721 | nM |
| CHEMBL1413743 | Br1c(CSc2oc(nn2)c3occc3)nc4cccn14                                                                                                                    | 23935 | nM |
| CHEMBL1541353 | CCC1=NC2=C(C(=O)N1Cc3occc3)C(=O)c4ccc(OC)cc4O2                                                                                                       | 23969 | nM |
| CHEMBL1365518 | Cc1onc(c1)C(=O)NCCCN2CCCC2=O                                                                                                                         | 24002 | nM |
| CHEMBL1548022 | COc1cc2[nH]c(Cl)c(c2cc1OC)[N+](=O)[O-]<br>CC\C=C\C(=O)N1CC2(C[C@H]1C(=O)N)CC(=NO2)c3cccc(NC(=O)C(=C)C)c3                                             | 24283 | nM |
| CHEMBL1340117 | COc1ccc2[nH]c3c4C(=O)C=CC(=O)c4ccc3c2c1                                                                                                              | 24549 | nM |
| CHEMBL1607313 | COc1ccc2[nH]c3c4C(=O)C=CC(=O)c4ccc3c2c1                                                                                                              | 24724 | nM |
| CHEMBL2140249 | CC(=O)Nc1ccc(C=C(C#N)c2ccc(C)cc2)cc1                                                                                                                 | 24744 | nM |
| CHEMBL1610414 | Cc1ccc(SCCN2C(=O)NC(C)(C)C2=O)cc1                                                                                                                    | 24814 | nM |
| CHEMBL1538976 | CCOc1ccc2nc(O)c(CN(Cc3nnnn3Cc4occc4)C5CCCCC5)cc2c1                                                                                                   | 24925 | nM |
| CHEMBL1452254 | Fe1ccc(cc1)N2C(=S)NC(=O)\C(=C\c3occc3)\C2=O                                                                                                          | 25000 | nM |
| CHEMBL3197750 | Oc1ccc(\C=N\NC2=NCCCCC2)c(O)c1<br>Cc1ccc(cc1)n2nc(C)c(C3C(=C(N)OC4=C3C(=O)O)c5ceccc45)C#N)c2C1                                                       | 25092 | nM |
| CHEMBL1566545 | 1                                                                                                                                                    | 25242 | nM |
| CHEMBL3199328 | Oc1ccc(\C=N\NP(=S)(c2ceccc2)c3ceccc3)c(O)c1O                                                                                                         | 25258 | nM |
| CHEMBL1324111 | Cc1c(Br)c(O)c(Br)c2SC(=O)Oc12                                                                                                                        | 25288 | nM |
| CHEMBL1496732 | CCc1ccc(CNc2ccc(O)cc2)cc1                                                                                                                            | 25359 | nM |
| CHEMBL1500249 | Oc1cc(cc(O)c1O)C(=O)OCC2O[C@@H](OC(=O)c3cc(O)c(O)c(O)c3)[C@@H](OC(=O)c4cc(O)c(O)c(O)c4)[C@@H](OC(=O)c5cc(O)c(O)c(O)c5)[C@@H]2OC(=O)c6cc(O)c(O)c(O)c6 | 25388 | nM |
| CHEMBL1438567 | Cc1ccc(CNc2ccc(O)cc2)cc1                                                                                                                             | 25510 | nM |
| CHEMBL1423479 | Oc1ccc(NCN2C(=O)C3C4CC(C=C4)C3C2=O)cc1                                                                                                               | 25701 | nM |
| CHEMBL1538100 | O=C(NC(=S)Nc1ceccc1N2CCOCC2)\C=C\c3occc3                                                                                                             | 25777 | nM |
| CHEMBL1564253 | O=C1Oc2c3CCCN4CCCc(cc2S1)c34<br>C\C(=C/c1ceccc1)\C=C\2/SC(=S)N(CCCC(=O)Nc3ccc(C(=O)O)c(O)c3)C2=O                                                     | 25970 | nM |
| CHEMBL1384502 | C\C(=C/C(=O)c1cccnc1)\Nc2ccc(O)cc2                                                                                                                   | 26013 | nM |
| CHEMBL3198517 | C\C(=C/C(=O)c1cccnc1)\Nc2ccc(O)cc2                                                                                                                   | 26183 | nM |
| CHEMBL1419712 | CCc1ceccc1NC(=O)c2cccc(NC(=O)\C=C\c3occc3)c2                                                                                                         | 26582 | nM |
| CHEMBL1493529 | COc1cc(CC(=O)OCC(=O)Nc2ceccc(c2)[N+](=O)[O-])cc(OC)c1OC                                                                                              | 26638 | nM |
| CHEMBL1598092 | CN(C(=Nc1cccnc1)S)c2ccc(O)cc2                                                                                                                        | 26983 | nM |
| CHEMBL1597115 | Clc1ceccc1CNC(=O)c2csc3CCCCCc23                                                                                                                      | 27215 | nM |
| CHEMBL3191565 | O\N=C/1\C(\CCC1)=C\c2occc2                                                                                                                           | 27219 | nM |
| CHEMBL1517543 | CCN(CC)c1ccc(NC2CC(=O)N(CCc3ccc(OC)cc3)C2=O)cc1                                                                                                      | 27329 | nM |
| CHEMBL1541890 | OC(=O)Cc1ccc(cc1)N=Nc2c(O)c(cc3ceccc23)C(=O)O                                                                                                        | 27546 | nM |
| CHEMBL1488004 | Cc1ceccc(N(C(C(=O)Nc2occc2)c3ccncc3)C(=O)Cn4nnc5ceccc45)c1C                                                                                          | 27590 | nM |
| CHEMBL1437464 | CCOC(=O)C1CCCN(C1)C(=O)c2cc(nc3ceccc23)c4occc4                                                                                                       | 27780 | nM |
| CHEMBL1343300 | CC(C)Sc1nnc(Cc2cc(O)nc(O)n2)n1c3cccc(C)c3                                                                                                            | 28238 | nM |
| CHEMBL1605431 | COC(=O)COc1ccc(cc1)S(=O)(=O)Nc2cc(OC)ccc2OC                                                                                                          | 28244 | nM |
| CHEMBL1571047 | CC1(C)Cc2nc3sc(C(=O)O)c(N)c3cc2CS1                                                                                                                   | 28300 | nM |
| CHEMBL1500799 | Br1ccc(NN=C(Nc2ceccc2)P(=O)(N3CCOCC3)N4CCOCC4)cc1                                                                                                    | 28355 | nM |
| CHEMBL1470303 | FC(F)(F)c1cc(nc(NCc2occc2)n1)c3occc3                                                                                                                 | 28538 | nM |
| CHEMBL1352145 | COC(=O)C1=C(C)NC(=O)/C/1=C\c2cc(C)n(c2C)c3ceccc3C                                                                                                    | 28654 | nM |
| CHEMBL1976046 | [O-][N+](=O)c1cc(ccc1Cl)c2oc(\C=N\c3nc4cccn4c3c5occc5)cc2                                                                                            | 28680 | nM |
| CHEMBL1480305 | CN(c1c(C)cc(C)c(c1C)S(=O)(=O)N2CCCCC2)S(=O)(=O)c3ccc(Cl)cc3                                                                                          | 29008 | nM |
| CHEMBL1340514 | CCN=C1C=CC(=CC(=C1O)C(=O)\C=C\c2ccc3OCOc3c2)Br                                                                                                       | 29067 | nM |
| CHEMBL3209184 | COC(=O)\C(=N\Nc1ceccc1C)\N2CCCc3ceccc23<br>CC(=C)C(=O)Nc1ceccc(c1)C2=NOC3(C[C@H](N(C3)C(=O)CC(c4cccc4)c5ceccc5)C(=O)N)C2                             | 29237 | nM |
| CHEMBL1518604 | CCCCC1=CC2=C(C(=O)C(C)(OC(=O)c3ccc(OC)cc3)C(=O)C2=CN1C                                                                                               | 29299 | nM |
| CHEMBL1456730 | CCCCO)c4occc4                                                                                                                                        | 29309 | nM |



|               |                                                                                              |       |    |
|---------------|----------------------------------------------------------------------------------------------|-------|----|
| CHEMBL1561303 | Cc1ccc2cc(CN(CC3CCCO3)Cc4nnnn4Cc5occc5)c(O)nc2c1C                                            | 29378 | nM |
| CHEMBL1558288 | FC(F)(F)c1cccc(c1)N2C(=O)CC(Nc3ccc(cc3)N4CCOCC4)C2=O                                         | 29455 | nM |
| CHEMBL1564810 | CC(=O)NC1=NC(=O)\C(=C\c2cc(C)n(c2C)c3cccc(c3)C(=O)O)\S1                                      | 29719 | nM |
| CHEMBL1299853 | Cc1ccc(C(CC(=O)NCc2occc2)c3ccccc3)c(O)c1                                                     | 30042 | nM |
| CHEMBL1387187 | Br1c1cccc1C(=O)Nc2ccn(n2)c3ccccc3                                                            | 30155 | nM |
| CHEMBL1479899 | CCc1c(C)sc(NC(=O)OC)c1C(=O)N2CCCCC2                                                          | 30235 | nM |
| CHEMBL52347   | O=C1C=Cc2ccccc2C1=O                                                                          | 30461 | nM |
| CHEMBL1575442 | Cc1oc(cc1)c2cc(c3ccc4OCOc4c3)c(C#N)c(N)n2                                                    | 30478 | nM |
| CHEMBL1981464 | Cc1ccsc1\C=N\c2ccc(O)cc2                                                                     | 30533 | nM |
| CHEMBL1733621 | CCC(C)C(NC(=O)[C@@H](NC(=O)c1ccccc1F)C(C)C)C(=O)OC                                           | 30708 | nM |
| CHEMBL3199408 | CC1CCCC(=C1O)\C=N\c2ccc(O)cc2                                                                | 30796 | nM |
| CHEMBL399293  | COc1cc(OC)c2c(O)c3CO[C@@H](C)[C@@H](O)c3c(c4c5[C@H](O)[C@H](C)OCc5c(O)c6c(OC)cc(OC)cc46)c2c1 | 30829 | nM |
| CHEMBL1389450 | O=C1NC(=O)\C(=C\C=C\c2occc2)\C(=O)N1Cc3ccccc3                                                | 30878 | nM |
| CHEMBL1535216 | O=C1NC(=O)C(=Cc2oc(SC3CCCCC3)cc2)C(=O)N1                                                     | 30888 | nM |
| CHEMBL1710057 | OC(=O)C1=NN(C(=O)C1)c2cc(Cl)c(cc2Cl)S(=O)(=O)O                                               | 30944 | nM |
| CHEMBL1373855 | CC(=O)Nc1cccc(Oc2nenc3scc(c4ccccc4)c23)c1                                                    | 31028 | nM |
| CHEMBL3198782 | CC(C)CNC1=CC(=O)CC(C1)c2occc2                                                                | 31255 | nM |
| CHEMBL175266  | CC1=C2C=C(O)C(=O)C=C2Oc3ccc(O)c(O)cc13                                                       | 31297 | nM |
| CHEMBL1576952 | CCOC(=O)C1=C(C)N=C2SC(=CC(=O)N2C1c3cc(OC)c(OC)c(OC)c3)C(=O)OC                                | 31407 | nM |
| CHEMBL1398855 | Nc1ccc(Nc2ccccc2)c(c1)S(=O)(=O)O                                                             | 31412 | nM |
| CHEMBL1536118 | Br1ccc(NC(=O)\C=C\c2cccs2)nc1                                                                | 31412 | nM |
| CHEMBL3190186 | Nc1ccccc1NC2=CC(=O)CC(C2)c3occc3                                                             | 31565 | nM |
| CHEMBL1459778 | CC(=C)C(=O)Nc1cccc(c1)C2=NOC3(C[C@@H](N(C3)C(=O)C(c4ccc(cc4)c5ccccc5)C(=O)N)C2               | 31746 | nM |
| CHEMBL3191714 | Cc1ncc(CO)c(\C=N\NC(=O)c2cc(O)c(O)c(O)c2)c1O                                                 | 32123 | nM |
| CHEMBL1400929 | CC(=O)Nc1ccc(cc1)S(=O)(=O)Nc2nc3ccccc3nc2Nc4ccc(C(=O)O)c(O)c4                                | 32163 | nM |
| CHEMBL1386695 | FC(F)(F)C1CCN(CC1)c2ccc(NC(=O)Nc3ccc(Cl)cc3)cn2                                              | 32459 | nM |
| CHEMBL1319656 | CCCCN1C(=O)NC(=O)\C(=C(\CC)/NCCN2CCCCC2)\C1=O                                                | 32493 | nM |
| CHEMBL1347633 | CC(CNc1ccccc1O)C(=O)O                                                                        | 32717 | nM |
| CHEMBL3196704 | CCOC(=O)C1=C(N=C2S\C(=C/c3occc3)\C(=O)N2C1c4cccs4)c5ccccc5                                   | 32790 | nM |
| CHEMBL1448985 | O=C(NCCc1ccccc1)c2ccc3nc(c4occc4)c(nc3c2)c5occc5                                             | 33139 | nM |
| CHEMBL1312576 | OC(=O)c1ccc(cc1)n2ccccc2C=C(C#N)C#N                                                          | 33284 | nM |
| CHEMBL1539384 | Oc1ccc(NCc2nnc(O)c3ccccc23)cc1                                                               | 33726 | nM |
| CHEMBL1479292 | CC(C)c1ccc(\C=C\C(=O)N2CCc3ccccc3C2)cc1                                                      | 33743 | nM |
| CHEMBL2006418 | Oc1ccc(\C=N\Nc2ccc(cc2S(=O)(=O)N3CCOCC3)[N+](=O)[O-])c(O)c1O                                 | 33991 | nM |
| CHEMBL1374511 | CCOc1cc(CNc2ccc(O)cc2)ccc1OCc3ccc(Cl)cc3Cl                                                   | 33999 | nM |
| CHEMBL1509980 | CC(C)c1ccc(cc1)N2C(=O)NC(=O)\C(=C/C=C/c3occc3)\C2=O                                          | 34175 | nM |
| CHEMBL1549172 | COc1ccccc(c1)N2C(=O)NC(=O)\C(=C\c3ccc(s3)[N+](=O)[O-])\C2=O                                  | 34347 | nM |
| CHEMBL1429677 | COCCCN(C(=O)\C(=C\c1ccc(OCC(=O)O)c(OC)c1)\C#N                                                | 34408 | nM |
| CHEMBL1496473 | CC1=CC2(O)OCCN(CCO)C2=CC1=O                                                                  | 34498 | nM |
| CHEMBL1360102 | COc1cc(CNc2ccc(O)cc2)cc(Br)c1OCc3ccccc3                                                      | 34537 | nM |
| CHEMBL1382847 | [O-][N+]1=C(C(=O)N(OCc2cccn2)c3ccccc13)c4oc5ccccc5c4                                         | 34537 | nM |
| CHEMBL1447034 | Cc1ccc2C3C=CCC3C(Nc2c1C)C(=O)O                                                               | 34670 | nM |
| CHEMBL1720594 | Clc1ccccc1N=Nc2cccn2                                                                         | 35035 | nM |
| CHEMBL1578372 | Cc1cc(C(=O)CSc2nnnn2c3ccccc3)c(C)n1CC4CCCO4                                                  | 35041 | nM |
| CHEMBL1378258 | FC(F)(F)c1cc(nc(SCC(=O)N2CCc3ccccc3C2)n1)c4occc4                                             | 35210 | nM |
| CHEMBL1995550 | Oc1ccc(\C=N\N=C(\C(=O)c2ccccc2)/c3ccccc3)c(O)c1O                                             | 35242 | nM |

|               |                                                                               |       |    |
|---------------|-------------------------------------------------------------------------------|-------|----|
| CHEMBL1379060 | COCCNC(=O)COC(=O)c1[nH]c(C)c(C(=O)C)c1C                                       | 35420 | nM |
| CHEMBL1968789 | Oc1ccc(\C=N\N2\C(=N\CC=C)\SC=C2c3occc3)c(O)c1O                                | 35444 | nM |
| CHEMBL1391625 | CCOc1cc(N2CCOCC2)c(OCC)cc1NC(=O)CSc3nc[nH]n3                                  | 35656 | nM |
| CHEMBL1717355 | O=C1NC(=S)NC1=Cc2occc2                                                        | 35684 | nM |
| CHEMBL1410964 | COc1cc(cc(OC)c1OC)C(=O)NCc2oc(SCC(=O)Nc3nc4ccc(C)cc4s3)nn2                    | 35858 | nM |
| CHEMBL1310907 | Cc1ccc(NC(=O)CN2C(=O)N\C(=C\c3occc3)\C2=O)cc1                                 | 35970 | nM |
| CHEMBL3197651 | Cc1cccc(N\N=C\c2ccc(O)c(O)c2O)c1                                              | 35995 | nM |
| CHEMBL1407877 | Cc1ccc(cc1)N2C(=S)S\C(=C\c3occc3)\C2=O                                        | 36020 | nM |
| CHEMBL592184  | CC(=O)NN1C(=S)S\C(=C/c2oc(Br)cc2)\C1=O                                        | 36195 | nM |
| CHEMBL1557235 | O=C(CN1C(=O)NC2(CCCCCC2)C1=O)NCc3cccs3                                        | 36458 | nM |
| CHEMBL1393622 | Cc1cnncc2ccc3c(no[n+] <sup>3</sup> [O-])c12                                   | 36541 | nM |
| CHEMBL1373732 | CC(=O)c1ccc2NC(C3CC=CC3c2c1)c4ccncc4                                          | 36569 | nM |
| CHEMBL484640  | Cc1c(O)cc2OC(CC(=O)c2c1O)c3ccc(O)cc3                                          | 37149 | nM |
| CHEMBL1735496 | NC(=S)N=Ne1c(O)cc(O)c2nc(O)ccc12                                              | 37205 | nM |
| CHEMBL1501325 | Cn1cnncc1SC\C(=C(/C#N)\c2nc3ccccc3[nH]2)\O                                    | 37446 | nM |
| CHEMBL1571187 | O=C1CCCC(=O)C1=NNc2ccc(cc2)S(=O)(=O)N3CCOCC3                                  | 37636 | nM |
| CHEMBL1434555 | CN(CC(=O)Nc1ccc(C)cc1)C(=O)c2cccc(c2)n3ccccc3                                 | 38005 | nM |
| CHEMBL1484657 | O=C1N(Cc2occc2)C(=S)Nc3ccc(cc13)N4CCOCC4                                      | 38652 | nM |
| CHEMBL3195481 | Cc1cncn1CC(=O)N\N=C\c2ccc(O)c(O)c2                                            | 39009 | nM |
| CHEMBL1577182 | CCc1cc2cc(C)cc(C)c2nc1SCC(=O)N3CCN(CC3)C(=O)c4occc4                           | 39280 | nM |
| CHEMBL1373183 | Cc1ccc(C)c2nc(O)c(CN(Cc3ccc4OCOc4c3)Cc5nnnn5Cc6occc6)cc12                     | 39572 | nM |
| CHEMBL1464727 | COC(=O)C1=C(C)NC(=O)/C/1=C\c2occc2                                            | 39663 | nM |
| CHEMBL1163377 | CN1CCN(CC1)C2=C(Cl)C(=O)c3ccccc3C2=O                                          | 40018 | nM |
| CHEMBL1580917 | Cc1nn(c2ccccc2)c3sc(cc13)C(=O)N4CCc5ccccc5C4                                  | 40133 | nM |
| CHEMBL426     | CN(Cc1cnc2nc(N)nc(N)c2n1)c3ccc(cc3)C(=O)NC(CCC(=O)O)C(=O)O                    | 40141 | nM |
| CHEMBL1335040 | CCC(NC(=O)Nc1ccc(O)cc1)(C(F)(F)F)C(F)(F)F                                     | 40216 | nM |
| CHEMBL1564066 | CN=C1C=CC(=CC(=C1O)C(=O)\C=C\c2ccc3OCOc3c2)Br                                 | 40729 | nM |
| CHEMBL1555191 | CN(CC(=O)Nc1cccc(F)c1)C(=O)c2cccc(c2)n3ccccc3                                 | 40924 | nM |
| CHEMBL1422858 | O=C1CCCC/C/1=C/Nc2ccc3OCOc3c2                                                 | 41299 | nM |
| CHEMBL1507759 | Oc1ccc2ccccc2c1C3Nc4ccccc5cccc(N3)c45                                         | 41650 | nM |
| CHEMBL11417   | COC1=C(N)C(=O)c2nc(ccc2C1=O)c3nc(C(=O)O)c(C)c(c3N)c4ccc(OC)c(O)c4O            | 42129 | nM |
| CHEMBL1520425 | COC(=O)Cn1c(CCC(=O)O)ccc1c2ccccc2                                             | 42288 | nM |
| CHEMBL1307692 | Fe1ccc(CN2C(=O)NC(=O)\C(=C\C=C\c3occc3)\C2=O)cc1                              | 42342 | nM |
| CHEMBL1503776 | Cc1cc(C)cc(Nc2ncc3C(=O)CC(Cc3n2)c4occc4)c1                                    | 42685 | nM |
| CHEMBL1524408 | [O-][n+] <sup>1</sup> c2CCCCc2[n+] <sup>1</sup> ([O-])c3cc(Cl)ccc13           | 42904 | nM |
| CHEMBL1428153 | Cc1cccc(NC2=Ne3ccccc3N4C(c5ccc(O)c(O)c5)c6c(C)nn(c7ccccc7)c6N=C24)c1          | 42949 | nM |
| CHEMBL1433261 | CCn1cc(CNC(=O)c2ccc(Cl)c(c2)[N+](=O)[O-])c(C)n1                               | 42964 | nM |
| CHEMBL2094422 | Oc1cc(CC(=O)N\N=C\C=C\c2ccccc2)n[nH]1                                         | 43057 | nM |
| CHEMBL1549311 | CC(=O)Nc1ccc(cc1)S(=O)(=O)Nc2nc3ccccc3nc2Nc4ccc(N)cc4                         | 43283 | nM |
| CHEMBL1373753 | COc1cc(ccc1O)C2C(=C(N)N(C3=C2C(=O)CCC3)c4ccncc4)C#N                           | 43357 | nM |
| CHEMBL1341268 | CCn1c2ccccc2c3cc(NC(=O)c4ccccc4[N+](=O)[O-])ccc13                             | 43803 | nM |
| CHEMBL1361845 | CC(C)(C)NC(=O)C(N(C(=O)CNC(=O)c1occc1)c2ccc3OCOc3c2)c4ccncc4                  | 44052 | nM |
| CHEMBL1723523 | CN(CCc1ccccc1)C(=O)c2ccc(NC(=O)Cc3ccc(NC(=O)C4CCN(CC4)C(=O)CCc5ccccc5)cc3)cc2 | 44272 | nM |
| CHEMBL1332241 | CN1C(=S)NC(=O)\C(=C/c2cccn2c3ccc4ccccc4c3)\C1=O                               | 44469 | nM |
| CHEMBL1488190 | CCC(=O)NNc1cnc2ccccc12                                                        | 44509 | nM |
| CHEMBL1482715 | CC1(CCl)[N+](=C2CCCCC2=[N+] <sup>1</sup> [O-])[O-]                            | 44600 | nM |
| CHEMBL1701585 | CN(C)C(=O)c1nc2ccc(Cl)cn2c1CN3CCCC(C3)OCc4ccccc4                              | 44612 | nM |

|               |                                                                            |       |    |
|---------------|----------------------------------------------------------------------------|-------|----|
| CHEMBL1715550 | <chem>COc1cc(\C=C\C=C=C/2\CC\C(=C\C=C\C3ccc(O)c(OC)c3)\C2=O)ccc1O</chem>   | 44779 | nM |
| CHEMBL1533336 | <chem>CC(NC(=O)Nc1ccc(O)cc1)(C(F)(F)F)C(F)(F)F</chem>                      | 44783 | nM |
| CHEMBL1487660 | <chem>O=S(=O)(N1CCOCC1)c2ccc3nc(c4occc4)c(nc3c2)c5occc5</chem>             | 44849 | nM |
| CHEMBL1461309 | <chem>C=CCNc1nc2ccccc2nc1NS(=O)(=O)c3cccs3</chem>                          | 44952 | nM |
| CHEMBL1424746 | <chem>CCc1ccc(cc1)N2C(=O)NC(=O)\C(=C/C=C/c3occc3)\C2=O</chem>              | 45025 | nM |
| CHEMBL1521203 | <chem>[O-][N+](=O)c1ccccc1S(=O)(=O)NC2CCCC2</chem>                         | 45032 | nM |
| CHEMBL1489590 | <chem>CC1(OC(=O)C2CCCC2)C(=O)C=C3C=C(OC=C3C1=O)c4ccsc4</chem>              | 45427 | nM |
| CHEMBL1462735 | <chem>OC(=O)CCc1ccc(c2cccs2)n1c3ccc(cc3)C(=O)O</chem>                      | 45608 | nM |
| CHEMBL1386686 | <chem>CCOC(=O)c1enn2c(N)c(nnc12)C#N</chem>                                 | 45710 | nM |
| CHEMBL1407135 | <chem>COC(=O)C1=C(C)N(CC=C)C(=O)/C/1=C\c2occc2</chem>                      | 45865 | nM |
| CHEMBL1445447 | <chem>Sc1nnc(C2CC2)n1Cc3occc3</chem>                                       | 45896 | nM |
| CHEMBL1456035 | <chem>OC(=O)C1Nc2c(Cl)cc(Cl)c(Cl)c2C3C=CCC13</chem>                        | 45923 | nM |
| CHEMBL1539623 | <chem>O=C(CCN1C(=S)S\C(=C/c2cccs2)\C1=O)NC3=NCCS3</chem>                   | 45987 | nM |
| CHEMBL1430931 | <chem>COC(=O)c1ccc(COc2ccccc2)C=C(/C#N)\C(=O)Nc3c(C)cc(C)cc3C)cc1</chem>   | 46228 | nM |
| CHEMBL1563532 | <chem>COc1ccc2OCc3ccccc3C(=O)c2c1</chem>                                   | 46311 | nM |
| CHEMBL1551448 | <chem>COc1ccc(NC(=O)CN(C)C(=O)c2cc(nc3ccccc23)c4occc4)cc1</chem>           | 46350 | nM |
| CHEMBL1599024 | <chem>Cc1ccc2cc(C(N3CCc4ccccc34)c5nnnn5Cc6ccccc6)c(O)nc2c1</chem>          | 46437 | nM |
| CHEMBL1371301 | <chem>CCN(CC)c1ccc(NC(=O)CCS(=O)(=O)c2ccc(Br)cc2)c(C)c1</chem>             | 46486 | nM |
| CHEMBL1438907 | <chem>COc1ccc(Br)cc1CNc2ccc(O)cc2</chem>                                   | 46687 | nM |
| CHEMBL1985664 | <chem>COc1ccc(\C=N\NC(=O)c2cc(O)c(O)c2)cc1Cn3cc(en3)[N+](=O)[O-]</chem>    | 46702 | nM |
| CHEMBL1405178 | <chem>O=C(C1CCCN1S(=O)(=O)c2ccccc3ccnc23)N4CCN(CC4)c5ccccc5</chem>         | 46817 | nM |
| CHEMBL1400666 | <chem>Cc1cc(C)cc(Nc2ccc(cc2N)C(=O)O)c1</chem>                              | 47139 | nM |
| CHEMBL1568805 | <chem>CC1=CC(=O)c2c(O)c(O)ccc2O1</chem>                                    | 47371 | nM |
| CHEMBL1535453 | <chem>CN(C)c1ccc(NC(=O)CSC2=Nc3ccccc3C(=O)N2C4CCCC4)cc1</chem>             | 47439 | nM |
| CHEMBL2000670 | <chem>Oc1ccc(cc1)\N=C\c2ccc(OCc3ccccc3)cc2</chem>                          | 47519 | nM |
| CHEMBL1366516 | <chem>CC(C)N1CCC2(CC1)C(=C(N)NC(=C2C#N)S)C#N</chem>                        | 47631 | nM |
| CHEMBL1374754 | <chem>O=S(=O)(Nc1ncsc1)c2ccc(Nc3nnc(c4ccccc4)c5ccccc35)cc2</chem>          | 47706 | nM |
| CHEMBL1330736 | <chem>CCOC(=O)C1=C(O)\C(=C\c2oc(CNC(=O)C(=O)Nc3ccc(C)cc3)cc2)\N=C1C</chem> | 47835 | nM |
| CHEMBL220259  | <chem>Nc1ccc2c(O)cc(cc2c1)S(=O)(=O)O</chem>                                | 47954 | nM |
| CHEMBL1382979 | <chem>O=C(CCCN1C(=S)S\C(=C\c2occc2)\C1=O)Nc3ccc4ccccc4c3</chem>            | 48281 | nM |
| CHEMBL1374657 | <chem>O=C(NCCc1c[nH]c2ccccc12)c3ccc(cc3)S(=O)(=O)NCc4occc4</chem>          | 48319 | nM |
| CHEMBL1703645 | <chem>Cc1cc(cc2C3C=CCC3C(Nc12)c4ccccc4)[N+](=O)[O-]</chem>                 | 49134 | nM |
| CHEMBL1466563 | <chem>Cc1cc(C(=O)CSc2nc(O)c3ccccc3n2)c(C)n1C</chem>                        | 49178 | nM |
| CHEMBL1506938 | <chem>Cc1ccc(Nc2ccc(N)cc2S(=O)(=O)O)cc1</chem>                             | 49333 | nM |
| CHEMBL1706128 | <chem>CCOC(=O)C(=O)Cc1cccn1</chem>                                         | 49486 | nM |
| CHEMBL1390729 | <chem>O=C(NCC1CCCO1)c2cc(nc3ccccc23)c4occc4</chem>                         | 49502 | nM |
| CHEMBL3191780 | <chem>C\N=C\1/SC=C(C)N1\N=C\c2ccc(O)c(O)c2O</chem>                         | 49829 | nM |
| CHEMBL1307209 | <chem>Cn1c(SCC(=O)c2cc(Cl)c(Cl)s2)nnc1c3occc3</chem>                       | 49999 | nM |
| CHEMBL1312802 | <chem>Cc1nc2cc(NN=C3C(=O)CCCC3=O)ccc2s1</chem>                             | 49999 | nM |
| CHEMBL1347346 | <chem>[Na+].CCC(C)CN1C(=CC2=NN(C(=O)C2=C1C)c3nc4ccccc4s3)[O-]</chem>       | 49999 | nM |
| CHEMBL1539086 | <chem>COc1cc(CNc2ccc3[nH]c(O)nc3c2)cc(Cl)c1OCC(=O)NC(C)(C)C</chem>         | 50510 | nM |
| CHEMBL1321176 | <chem>Brc1ccc(cc1)S(=O)(=O)CCC(=O)NC2CCCC2</chem>                          | 50819 | nM |
| CHEMBL1457086 | <chem>Cc1ccc(cc1)S(=O)(=O)N2CCC(CC2)C(=O)Nc3nnc(s3)c4occc4</chem>          | 51066 | nM |
| CHEMBL1320455 | <chem>CCCCC(=O)NC(=S)Nc1ccc(cc1Cl)C(=O)O</chem>                            | 51158 | nM |
| CHEMBL1735454 | <chem>Oc1ccc(N=Nc2c(O)cc(c3ccccc23)S(=O)(=O)O)c(O)c1</chem>                | 51339 | nM |
| CHEMBL1398921 | <chem>Clc1ccc(OCc2nn3c(nnc3s2)c4occc4)c(Cl)c1</chem>                       | 51481 | nM |
| CHEMBL1465049 | <chem>Oc1ccc(NCc2ccccc2OCc3ccccc3)cc1</chem>                               | 51562 | nM |
| CHEMBL1403572 | <chem>CN1C(=S)NC(=O)\C(=C/NNC(=O)c2ccccc2)\C1=O</chem>                     | 51822 | nM |
| CHEMBL3392035 | <chem>CCOC(=O)C1=C(N)SC(=S)C2=C1CCC2</chem>                                | 52030 | nM |

|               |                                                                                                                                                                          |       |    |
|---------------|--------------------------------------------------------------------------------------------------------------------------------------------------------------------------|-------|----|
| CHEMBL1390647 | CNC1=CC=C(Br)C=C(C(=O)\C=C\c2ccc(OC)cc2OC)C1=O                                                                                                                           | 52035 | nM |
| CHEMBL1523543 | COc1ccc2c(c1)[n+](=[O-])c3CCc3[n+][O-]                                                                                                                                   | 52109 | nM |
| CHEMBL175266  | CC1=C2C=C(O)C(=O)C=C2Oc3cc(O)c(O)cc13                                                                                                                                    | 52180 | nM |
| CHEMBL1447514 | COC(=O)C1=C(N)OC2=C(C1c3cccs3)C(=O)CCC2                                                                                                                                  | 52219 | nM |
| CHEMBL1430855 | CCc1c(C)sc(NC(=O)c2cc(on2)c3occc3)c1C#N<br>CC(=C)C(=O)Nc1cccc(c1)C2=NOC3(C[C@H])(N(C3)C(=O)c4cc(cc(c4<br>)[N+](=O)[O-])[N+](=O)[O-])C(=O)N)C2                            | 52375 | nM |
| CHEMBL1353369 | OC(=O)COc1ccc2C(=O)\C(=C\c3occc3)\Oc2c1                                                                                                                                  | 52944 | nM |
| CHEMBL1522218 | Oc1cccc(\C=N\c2c(nc3ccccn23)c4occc4)c1                                                                                                                                   | 53108 | nM |
| CHEMBL1524927 | Oc1cccc(\C=N\c2c(nc3ccccn23)c4occc4)c1                                                                                                                                   | 53259 | nM |
| CHEMBL1558644 | CCCCC1=CC2=CC(=O)C(C)(OC(=O)C3CCCC3)C(=O)C2=CO1                                                                                                                          | 53638 | nM |
| CHEMBL1578768 | Brc1oc(\C=C\2/C(=O)N=C3SC(=NN3C2=N)CC(=O)N4CCCC4)cc1                                                                                                                     | 53730 | nM |
| CHEMBL1583808 | CC(C)CC(=O)Nc1nnc(s1)c2occc2                                                                                                                                             | 53787 | nM |
| CHEMBL1546820 | Cc1ccc(C)n1c2ccc(s2)c3nnc4CCCCCn34                                                                                                                                       | 54190 | nM |
| CHEMBL3195177 | CC\N=C\1/SC=C(C)N1\N=C\c2ccc(O)c(O)c2O<br>COC(=O)C1C(O)C(C)C(O)C(C)(O)\C=C/C=C(\C)/C(=O)Nc2c(C)c(OC<br>(=O)C)c3C4=C(OCOC4=C(C)C(=O)c3c2O)\C(=C\C(C)(O)C(O)C(C)C<br>1O)\C | 54379 | nM |
| CHEMBL3195484 | CN(C)c1ccc(cc1)N2C(=O)CSC2=S                                                                                                                                             | 54617 | nM |
| CHEMBL1509389 | CN(C)c1ccc(cc1)N2C(=O)CSC2=S                                                                                                                                             | 54638 | nM |
| CHEMBL1724282 | OC(=O)CC1=C(C(=O)O)C(=O)C(=CC=C1)O                                                                                                                                       | 54748 | nM |
| CHEMBL1343718 | CCOC1=CC=CC(=O)c2c(C)n(C)c(C)c12                                                                                                                                         | 55219 | nM |
| CHEMBL1576094 | [O-][N+](=O)c1oc(\C=C/C#N)\C(=O)Nc2ccc(F)cc2)cc1                                                                                                                         | 55645 | nM |
| CHEMBL578585  | Cc1onc(NC(=O)Cc2cccs2)c1                                                                                                                                                 | 55861 | nM |
| CHEMBL1538773 | OC(=O)CSc1c2CCc2nc3cc(ccc13)C(=O)Nc4cccc(c4)C(F)(F)F                                                                                                                     | 56199 | nM |
| CHEMBL1548829 | COC(=O)\C(=C/C=C/C=C/C=C/N(C)C)\N(C)C)\C(=O)C                                                                                                                            | 56319 | nM |
| CHEMBL1400903 | CCOC(=O)CSc1ncc2ccc(OC)c(OC)c12                                                                                                                                          | 56583 | nM |
| CHEMBL1711432 | COc1cc(NCCCCCN)c2ncccc2c1OC                                                                                                                                              | 56674 | nM |
| CHEMBL1873953 | Oc1c(O)c2ccccc2cc1[N+](=O)[O-]                                                                                                                                           | 56760 | nM |
| CHEMBL1468142 | CC1CC2=C(S1)C(=O)N(C)C(=N2)SCC(=O)Nc3cc(C)cc(C)c3                                                                                                                        | 56948 | nM |
| CHEMBL1352279 | Cc1ccc(Cl)cc1N2CCN(CC2)C(=O)COc3ccc4CCCC4c3                                                                                                                              | 57190 | nM |
| CHEMBL1324051 | CSc1nc(N(CCO)CCO)c2sc3nc(c4CCc4c3c2n1)c5occc5                                                                                                                            | 57328 | nM |
| CHEMBL3198658 | Cc1cc(C)c(cc1c2oc(\C=N\c3c(nc4ccccn34)c5occc5)cc2)[N+](=O)[O-]                                                                                                           | 57460 | nM |
| CHEMBL1523651 | CC1=NC(=C(C#N)C(/C/I=C(\O)/OCC=C)c2occc2)SCC(=O)Nc3ccccc3                                                                                                                | 57515 | nM |
| CHEMBL1479248 | COc1cccc1NCCC(=O)OCC(=O)Nc2occc2                                                                                                                                         | 58030 | nM |
| CHEMBL1475596 | Cn1enn1SCC(=O)Nc2ncc(s2)[N+](=O)[O-]                                                                                                                                     | 58218 | nM |
| CHEMBL1539362 | NC(=O)c1c2CCCCc2sc1NC(=O)c3ccc(cc3)S(=O)(=O)N4CCOCC4                                                                                                                     | 58277 | nM |
| CHEMBL1391120 | O=C(CSc1nnnn1c2ccccc2)Nc3ncc4C(=O)CC(Cc4n3)c5occc5                                                                                                                       | 58452 | nM |
| CHEMBL1504445 | Cc1cccc(c1)n2c(Cc3cc(O)nc(O)n3)nnc2SCC(=O)NCC4CCCO4                                                                                                                      | 58457 | nM |
| CHEMBL1447615 | CC(=O)N1CCN(CC1)c2nc(c3CSC(C)(C)Cc3c2C#N)c4occc4                                                                                                                         | 58829 | nM |
| CHEMBL1390770 | CCN(CC)c1nc(NCc2ccccc2)c(C#N)c3CCN(CC)Cc13                                                                                                                               | 59403 | nM |
| CHEMBL1547422 | Cl.CCCOc1ccc(N)cc1N                                                                                                                                                      | 59538 | nM |
| CHEMBL1359999 | Brc1oc(cc1)C(=O)Nc2ccccc2N3CCCC3                                                                                                                                         | 59629 | nM |
| CHEMBL1559207 | Cc1onc(c1C(=O)Nc2nnc(s2)C3CC3)c4c(F)cccc4Cl                                                                                                                              | 60686 | nM |
| CHEMBL1500840 | COc1ccc(NC(=O)\C(=C/c2oc(Br)cc2)\C#N)cc1                                                                                                                                 | 60788 | nM |
| CHEMBL1529201 | CC1(C)[N+](=C2C=CC(=CC2=[N+][O-])[N+](=O)[O-])[O-].NO                                                                                                                    | 61277 | nM |
| CHEMBL1416649 | COc1ccc(\C=C/Nc(=O)c2ccc(OCC(C)C)cc2)\C(=O)OCc3occc3)cc1                                                                                                                 | 61465 | nM |
| CHEMBL3195461 | Oc1ccc(cc1)\N=C\c2sc3ccccc3c2Cl                                                                                                                                          | 62279 | nM |
| CHEMBL1997568 | COC(=O)c1ccc(COc2ccc(\C=N\Nc3cccc(c3)C(=O)O)cc2)cc1<br>COc1ccc(cc1)n2c(C)cc(C(=O)CSC3=NN4C(=NN=C(C4=O)C(C)(C)C<br>S3)c2C                                                 | 62412 | nM |
| CHEMBL1462509 | S3)c2C                                                                                                                                                                   | 62698 | nM |
| CHEMBL1898589 | NN=C1C(=C(Cl)C(=C1Cl)Cl)Cl                                                                                                                                               | 62872 | nM |
| CHEMBL1367262 | CCOc1cccc(CNc2ccc(O)cc2)c1OCc3ccccc3Cl                                                                                                                                   | 63039 | nM |

|               |                                                                  |       |    |
|---------------|------------------------------------------------------------------|-------|----|
| CHEMBL1582403 | CCC1=NN2C(=NC(=O)\C(=C\c3oc(SCc4occc4)cc3)\C2=N)S1               | 63258 | nM |
| CHEMBL1454531 | Cc1cccc(NC(=O)CNC(=O)c2cccc(c2)n3cccc3)c1C                       | 63294 | nM |
| CHEMBL1311036 | Cl.CN(C1CCN(C)CC1)C(=O)COc2cccc2c3cccc3                          | 63707 | nM |
| CHEMBL1365054 | Cc1ccc(cc1)N(CC(=O)NCCSCc2occc2)S(=O)(=O)c3ccc(F)cc3             | 63739 | nM |
| CHEMBL1333464 | C(SC1CCCCC1)c2cn3ccsc3n2                                         | 63775 | nM |
| CHEMBL1732255 | O=C1C(=Cc2occc2)CCCC1=Cc3occc3                                   | 63899 | nM |
| CHEMBL213017  | Cc1cc(\C=N\Nc2ccc(en2)[N+](=O)[O-])c(C)n1c3cccc(C(=O)O)c3C       | 63954 | nM |
| CHEMBL1588892 | o1cccc1c2nn3c(nnc3s2)c4ccnc4                                     | 63954 | nM |
| CHEMBL1509369 | OC(=O)C1=C(CSC2C(NC(=O)Cc3cccc3)C(=O)N12)C=C                     | 64157 | nM |
| CHEMBL3196561 | CN(C)c1ccc(cc1)\N=C\C=C/2\N(C)c3cccc3C2(C)C                      | 64399 | nM |
| CHEMBL1893341 | COC(=O)c1ccc(C(=O)OC)c(NC(=O)Cc2cccs2)c1                         | 64765 | nM |
| CHEMBL1419581 | CCOc1ccc(NCC2CCOC(C)(C)C2)cc1                                    | 64789 | nM |
| CHEMBL1511058 | COC(=O)c1ccc(C)c(NC(=O)CCSc2cccc2)c1                             | 65056 | nM |
| CHEMBL1989690 | CCOC(=O)C1CCCN(C1)C(=O)c2ccc(C\N=C/3\C(=O)C(=C3N4CCC(C)CC4)O)cc2 | 65277 | nM |
| CHEMBL1350188 | COc1cc(OC)c2C(=O)CC(Oc2c1O)c3cccc3                               | 65404 | nM |
| CHEMBL1487945 | CC1(OC(=O)CCc2cccc2)C(=O)C=C3C=C(OC=C3C1=O)c4ccsc4               | 65776 | nM |
| CHEMBL1378801 | CC(=O)Nc1ccc(cc1)S(=O)(=O)NCCSCc2occc2                           | 65798 | nM |
| CHEMBL1417382 | COc1cccc1NC(=O)CSc2nnc(Cc3cc(O)nc(O)n3)n2c4cccc4                 | 66484 | nM |
| CHEMBL1408535 | Oc1ccc(NCc2cccc(OCc3cccc3)c2)cc1                                 | 66736 | nM |
| CHEMBL1584278 | Cn1cccc1\C=C/2\C(=O)NC(=O)N(Cc3cccc3)C2=O                        | 66994 | nM |
| CHEMBL1455108 | CCOC(=O)Cn1nnnc1C(C(C)C)N(Cc2cc3c(C)cc(C)cc3nc2O)C4CCCC4         | 67647 | nM |
| CHEMBL602807  | COc1ccc2cccc2c1C3CC(=O)N4CN(Cc5occc5)CSC4=C3C#N                  | 67667 | nM |
| CHEMBL1234578 | Nc1cccc2cc(ccc12)S(=O)(=O)O                                      | 67864 | nM |
| CHEMBL1468124 | COC(=O)c1cnn2c(cc(nc12)c3occc3)C(F)(F)F                          | 68089 | nM |
| CHEMBL1356373 | OC(=O)CCc1ccc(cc1)S(=O)(=O)Nc2cc(ccc2N3CCCC3)C(F)(F)F            | 68191 | nM |
| CHEMBL1306571 | Cc1oc(cc1)C2SCC(=O)N2Cc3cn4ccsc4n3                               | 68491 | nM |
| CHEMBL1546783 | CCN(C(=O)CN1CCN(CC1)c2ccc(O)cc2)C3=C(N)N(Cc4cccc4)C(=O)NC3=O     | 68533 | nM |
| CHEMBL1305813 | CN(C)C(CNC(=O)c1ccnc1Sc2cccc2)c3occc3                            | 68679 | nM |
| CHEMBL1609070 | Oc1ccc(NCc2cccc(OCc3ccc(F)cc3)c2)cc1                             | 68747 | nM |
| CHEMBL1603474 | CN(CC(=O)Nc1ccc(C)cc1)C(=O)c2cc(nc3cccc23)c4occc4                | 69167 | nM |
| CHEMBL1430463 | COc1cccc(NC(=O)CSc2nnc(c3occc3)c(n2)c4occc4)c1                   | 69298 | nM |
| CHEMBL1524564 | OC(=O)c1[nH]c2ccc(Cl)cc2c1CC(=O)N3CCN(CC3)C(=O)c4occc4           | 69516 | nM |
| CHEMBL1485262 | O=C(Nc1cccc1)C2=C(CC(CC2=O)c3occc3)Nc4cccc4                      | 70291 | nM |
| CHEMBL3213843 | CC1SC(=NC1=O)N\N=C\c2occc2                                       | 70298 | nM |
| CHEMBL1465739 | CCN1C(=O)c2c3CCc3sc2N=C1SC(C)C(=O)O                              | 70403 | nM |
| CHEMBL1361743 | CCCC(=O)N(CCc1ccc(OC)cc1)Cc2nc(O)c3cccc3n2                       | 71828 | nM |
| CHEMBL1613004 | Oc1ccc(cc1O)c2cn3CCSc3n2                                         | 71879 | nM |
| CHEMBL1900570 | C1CN(CCN1c2cncn2)c3nccn3                                         | 71936 | nM |
| CHEMBL1968376 | Cl.Cc1cc(C)nc(N\N=C\C2=C(N3CCOCC3)\C(=C/c4ccc(Cl)cc4)\CC2)n1     | 72388 | nM |
| CHEMBL1389080 | Cc1cc(C)nc(n1)N2CCC(CC2)C(=O)O                                   | 72773 | nM |
| CHEMBL1331081 | [I-].CC[n+] <sup>1</sup> ccc(C)c2cc(ccc12)P(=O)(c3cccc3)c4cccc4  | 72913 | nM |
| CHEMBL1313485 | CCOC(=O)c1oc(CC(=O)c2ccc(O)c(O)c2O)cc1                           | 74005 | nM |
| CHEMBL1503182 | CC(=O)c1ccc(cc1)S(=O)(=O)Nc2cccc(c2)n3cnnn3                      | 74240 | nM |
| CHEMBL1571640 | CCN1CCCc2cc(CN(CCN3CCOCC3)C(=O)Nc4ccc(CC)cc4)ccc12               | 74458 | nM |
| CHEMBL234338  | Oc1ccc(cc1)C2=CC(=O)c3c(O)c(O)c(O)c(O)c3O2                       | 74865 | nM |
| CHEMBL1566068 | CCOc1ccc(CNc2ccc(cc2)N3CCCC3)cc1                                 | 75252 | nM |
| CHEMBL477936  | Cc1ccc(cc1)S(=O)(=O)OCC(=O)Nc2ccc(C(=O)O)c(O)c2                  | 75277 | nM |
| CHEMBL1710608 | CCN(CC(=O)Nc1c(F)cccc1F)C(=O)CSC(=S)N2CCCC2                      | 75584 | nM |

|               |                                                                                               |       |    |
|---------------|-----------------------------------------------------------------------------------------------|-------|----|
| CHEMBL1522695 | CN1C(=C(C(=O)COC(=O)C2CCCC2)C(=O)N(C)C1=O)N                                                   | 76227 | nM |
| CHEMBL1727409 | CC(C)Sc1nnc(Cc2cc(O)nc(O)n2)n1c3cc(C)ccc3C                                                    | 76994 | nM |
| CHEMBL1976219 | Oc1c(Br)cc(cc1\C=N\c2ccc(cc2)N3CCOCC3)[N+](=O)[O-]                                            | 77469 | nM |
| CHEMBL1559616 | BrC1ccc(NC=C2C(=O)CC(CC2=O)c3occc3)cc1                                                        | 77615 | nM |
| CHEMBL1707498 | CCOc1cccc1C(O)C2=CC(=O)c3cccc3C2=O                                                            | 77680 | nM |
| CHEMBL1332702 | Cl.CCCN1C(=N)N(CC(O)c2occc2)c3ccccc13                                                         | 78162 | nM |
| CHEMBL1460044 | COC(=O)CCCC(=O)Nc1c(F)c(F)c(F)c(F)c1F                                                         | 78229 | nM |
| CHEMBL1900407 | CCCCN1C2CCCC1CC(C2)NC(=O)c3ccc(OC)c(OC)c3                                                     | 78291 | nM |
| CHEMBL1565385 | Cc1nc2c(Cl)cccc2c(O)c1CN3CCCC3                                                                | 78327 | nM |
| CHEMBL1576106 | CCOC(=O)Cc1cc(O)n2nc(C)cc2n1                                                                  | 78346 | nM |
| CHEMBL1349942 | CCOc1cc(N2CCOCC2)c(OCC)cc1NC(C)C(=O)N3CCN(CC)CC3.OC(=O)C(=O)O                                 | 78805 | nM |
| CHEMBL1367133 | O=C1N(Cc2occc2)C(Nc3ccccc3)c4ncccc14                                                          | 79168 | nM |
| CHEMBL1403524 | BrC1=CC(=COC1=O)C(=O)Nc2ccc(Br)cn2                                                            | 79525 | nM |
| CHEMBL1339808 | COC(=O)C1=C(C)N(Cc2ccccc2)C(=O)/C1=C\c3occc3                                                  | 79695 | nM |
| CHEMBL2133196 | CCN1C[C@@H]2[C@H]3[C@H](C(=O)N(Cc4ccccc4)C3=O)[C@@](C)(N2/C1=N/C5CCCC5)C(=O)OC.Oc(=O)C(F)(F)F | 79756 | nM |
| CHEMBL1722566 | CN(CCC#N)C(=O)COC(=O)c1c2CC\C=C\c3occc3\c2nc4ccccc14                                          | 79769 | nM |
| CHEMBL1586657 | OC(=O)[C@@H]1CC[C@@H](CC1)NC(=O)OCc2ccccc2                                                    | 79770 | nM |
| CHEMBL1350226 | CN1CCc2c(C1)sc3c2c(NC4occc4)nc5nnnn35                                                         | 79810 | nM |
| CHEMBL1446929 | CCC(=O)NC1=C(Cl)C(=O)C(=C(Cl)C1=O)NC(=O)CC                                                    | 79821 | nM |
| CHEMBL1339888 | OC(=O)c1cc2cccc(c2cc1O)S(=O)(=O)N3CCOCC3                                                      | 80304 | nM |
| CHEMBL610508  | COc1ccc2C(CC(=O)c3ccc(O)c(O)c3)OC(=O)c2c1OC                                                   | 80536 | nM |
| CHEMBL576353  | Cc1cc(O)ccc1c2cnc3ccccc3n2                                                                    | 80768 | nM |
| CHEMBL1890961 | O=C1C=C(N2CC2)c3ccccc3C1=O                                                                    | 80943 | nM |
| CHEMBL1527971 | CCOC(=O)c1ccc(NC(=O)CSCc2occc2)cc1                                                            | 81621 | nM |
| CHEMBL1427517 | COc1ccc2nc3ccccc3nc2c1N                                                                       | 81646 | nM |
| CHEMBL1492200 | CCN1C(=C(C(=O)OC)\C(=C\c2occc2)\C1=O)C                                                        | 81829 | nM |
| CHEMBL1421238 | CCOC(=O)C1CCN(CC1)C(=O)COc2ccc(cc2)S(=O)(=O)NC(C)C                                            | 81829 | nM |
| CHEMBL1309683 | Cc1oc(C)c2C3=C(C=CC(=O)c12)C(C(=C(N)O3)C#N)c4ccccc4                                           | 81859 | nM |
| CHEMBL1433062 | COc1ccc(OC)c(c1)N2C(=O)[C@H]3ON=C([C@H]3C2=O)c4ccccc4Cl                                       | 82129 | nM |
| CHEMBL3193853 | O=C(N\N=C\1/CCCC(=O)C1)c2ccc(COc3ccccc4ccnc34)cc2                                             | 82296 | nM |
| CHEMBL1595597 | COc1ccc(cc1OC)C2=NCC(=O)N(CC(=O)NCc3occc3)c4sc5CCCCc5c24                                      | 82338 | nM |
| CHEMBL1402642 | Cc1oc(cc1)C(=O)C2=C(O)C(=O)N(C2c3ccc(F)cc3)c4ncccn4                                           | 82749 | nM |
| CHEMBL1328778 | COc1ccc(OC)c(c1)S(=O)(=O)Nc2ccc(O)c3ccccc23                                                   | 83040 | nM |
| CHEMBL1561738 | Cc1occc(c1)c2cc(nc(N)c2C#N)c3ccc(Cl)cc3                                                       | 83569 | nM |
| CHEMBL1380806 | Cl.CCOc1cccc(CNCCNC(=O)c2nonc2N)c1                                                            | 84171 | nM |
| CHEMBL1432334 | COc1cccc1C2C=C(Nc3nnnn23)c4ccc(C)cc4                                                          | 84418 | nM |
| CHEMBL1363465 | Cc1cccc(C)c1NC(=O)COC(=O)c2cc(nc3ccccc23)c4ccccc4                                             | 84606 | nM |
| CHEMBL1498126 | Cc1cc(C(=O)CSc2nnnn2C)c(C)n1CCc3ccc(Cl)cc3                                                    | 84609 | nM |
| CHEMBL1966984 | OC1CC(CC(O)C1OC(=O)\C=C\c2ccc(O)c(O)c2)(OC(=O)\C=C\c3ccc(O)c(O)c3)C(=O)O                      | 85194 | nM |
| CHEMBL1728065 | CN(C)c1ccc(CC2=Cc3c(O)ccc(O)c3C=C(Cc4ccc(cc4)N(C)C)C2=O)cc1                                   | 85420 | nM |
| CHEMBL1456026 | Cc1cccc(c1)n2nc3CSCc3c2NC(=O)c4oc(Br)cc4                                                      | 85925 | nM |
| CHEMBL1596115 | CCOc1cccc(CNc2ccc(O)cc2)c1OCc3ccc(Cl)cc3                                                      | 86022 | nM |
| CHEMBL1362933 | CN(C)c1cc(Cl)c2nonc2c1N                                                                       | 87225 | nM |
| CHEMBL1900368 | OC1=C2C(=CC=CC(=O)C2=O)CC(=O)O1                                                               | 87659 | nM |
| CHEMBL1536718 | ClC(Cl)(Cl)C(NC(=O)Cc1ccccc1)Nc2ccccc2                                                        | 87821 | nM |
| CHEMBL1546569 | CC(=O)OC1COC(C(OC(=O)C)C1OC(=O)C)n2ccc3ccccc23                                                | 88133 | nM |
| CHEMBL1470983 | BrC1=CC(=COC1=O)C(=O)NCc2ccccc2                                                               | 88328 | nM |

|               |                                                                                                                                |        |    |
|---------------|--------------------------------------------------------------------------------------------------------------------------------|--------|----|
| CHEMBL1366858 | CCOC(=O)NC1(NC2CCCCC2)Oe3ccccc3O1                                                                                              | 88377  | nM |
| CHEMBL1595607 | CCC(=O)N1N=C(CC1c2ccc(C)cc2)c3ccc(NS(=O)(=O)C)cc3                                                                              | 88764  | nM |
| CHEMBL1301323 | Cc1oc(\C=C\C(=O)Nc2cccc(c2)S(=O)(=O)N3CCOCC3)cc1                                                                               | 89133  | nM |
| CHEMBL1731349 | Fe1ccc(\C=C/2\CN(C\C(=C\c3ccc(F)cc3)\C2=O)C(=O)C=C)cc1                                                                         | 89470  | nM |
| CHEMBL1527565 | Cc1cc(O)c(cc1O)c2cc(O)c(C)cc2O                                                                                                 | 89682  | nM |
| CHEMBL1737002 | CN(C)c1ccc2cc(cc(O)c2c1)S(=O)(=O)O<br>Cc1ccc(cc1)N2C(=S)NC(=O)\C(=C/c3oc(CN(CCC#N)S(=O)(=O)C)cc3<br>\C2=O                      | 89990  | nM |
| CHEMBL1381289 | )\C2=O                                                                                                                         | 90018  | nM |
| CHEMBL1416184 | OCCNc1cc(Sc2nc3ccccc3s2)c4nonc4c1[N+](=O)[O-]                                                                                  | 90119  | nM |
| CHEMBL1579003 | OC(=O)c1oc(COc2c(F)c(F)c(F)c(F)c2F)cc1                                                                                         | 90615  | nM |
| CHEMBL1542330 | Clc1ccc(cc1Cl)c2cn3ccnc3n2                                                                                                     | 90898  | nM |
| CHEMBL1321516 | CC(=O)C1=C(C)NC(=C(C1c2cccs2)C(=O)C)C                                                                                          | 91400  | nM |
| CHEMBL1505865 | C\C(=C\C(=O)O)\C=C\c1oc(Cl)cc1                                                                                                 | 92029  | nM |
| CHEMBL3192400 | CCN(CC)S(=O)(=O)c1cccc(c1)C(=O)N\N=C\c2ccc(O)c(O)c2O                                                                           | 92720  | nM |
| CHEMBL1505758 | CCOc1ccc(cc1)n2c(Cc3cc(O)nc(O)n3)nnc2SC(C)C(=O)OC                                                                              | 92868  | nM |
| CHEMBL1523154 | COc1cc(ccc1OCc2c(C)onc2C)C(=O)NCC(N3CCCC3)c4occc4                                                                              | 93528  | nM |
| CHEMBL1502881 | Cc1cc(NC(=O)CCNS(=O)(=O)c2cc(Br)cnc2N)ccc1Br                                                                                   | 93660  | nM |
| CHEMBL1419195 | Fe1ccc(OCc2nnc(SCC(=O)NC(=O)NCc3occc3)n2CC=C)cc1<br>COCCn1nnnc1C(N2CCN(CC2)c3ccc(O)cc3)c4cc5cc(OC)c(OC)cc5nc4<br>O             | 93790  | nM |
| CHEMBL1413554 | O                                                                                                                              | 94264  | nM |
| CHEMBL1363824 | OC(=O)C1Nc2c(Cl)cc(Cl)cc2C3C=CCC13                                                                                             | 94367  | nM |
| CHEMBL1472381 | CC1CCN(CC1)S(=O)(=O)c2ccc(cc2)C(=O)NCc3ccc4OCOc4c3<br>CC(C)N1C2=C(C=C(C#N)/C/1=N\C(=O)c3occc3)C(=O)N4C=CC=CC<br>4=C2           | 95660  | nM |
| CHEMBL3199579 | 4=C2                                                                                                                           | 95912  | nM |
| CHEMBL1420642 | COc1cc(\C=C/2\C(=O)c3cccc(c3C2=O)[N+](=O)[O-])c(Br)cc1O                                                                        | 96529  | nM |
| CHEMBL1334980 | Cc1cccc(\C=C(/C(=O)O)\c2ccc(s2)S(=O)(=O)N3CCCC3)c1                                                                             | 98015  | nM |
| CHEMBL3198496 | C\N=C\1/SC=C(N1\N=C\c2ccc(O)c(O)c2O)c3cccs3                                                                                    | 98143  | nM |
| CHEMBL1504221 | Fe1cccc(c1)\C(=C/c2oc(cc2)N3CCCCC3)\C#N                                                                                        | 98433  | nM |
| CHEMBL1541522 | O=C(Nc1nnc(s1)C2CCCO2)c3cccs3                                                                                                  | 98826  | nM |
| CHEMBL1371777 | Clc1cccc1CSc2nnc(c3occc3)c(n2)c4occc4                                                                                          | 98960  | nM |
| CHEMBL1314823 | CC1=NN(C(=S)N)C(=O)C1N=Nc2cccc(c2)[N+](=O)[O-]<br>COc1ccc(c(OC)c1)c2cc(C(=O)N\N=C\c3ccc(OC)c(COCC(F)(F)C(F)F)c<br>3)c4ccccc4n2 | 99228  | nM |
| CHEMBL3189793 | 3)c4ccccc4n2                                                                                                                   | 99392  | nM |
| CHEMBL1524798 | COc1cccc(c1)c2cn3nc4CCCCc4nc3n2                                                                                                | 99986  | nM |
| CHEMBL3189877 | Cc1ccc(cc1)c2nc3S\C(=C/c4occc4)\C(=O)n3n2                                                                                      | 100000 | nM |
| CHEMBL1386036 | CCCN1cnc2cc(NC3cccn3)ccc12                                                                                                     | 100000 | nM |
| CHEMBL1386272 | COc1ccc(cc1)C2CC(c3ccccc3)n4nc(NC(=O)c5cccs5)nc4N2                                                                             | 100000 | nM |
| CHEMBL1342384 | CN(C)c1ccc(NC(=O)Cn2cc3CCCCc3n2)cc1                                                                                            | 100000 | nM |
| CHEMBL1975523 | CCN(CC)c1ccc(\C=N\c2ccc(cc2)N(C)C)c(O)c1                                                                                       | 100000 | nM |
| CHEMBL1212972 | CC1OC(CC(=O)O)CC2=C1C(=O)c3c(O)cccc3C2=O                                                                                       | 100000 | nM |
| CHEMBL1429930 | Cc1c(CCc2cnc2)n3ccccc3c1C(=O)Nc4ccc(Cl)cc4                                                                                     | 100000 | nM |
| CHEMBL1414027 | Cc1oc(CCC(=O)Nc2ccc(cc2)S(=O)(=O)N)cc1                                                                                         | 100000 | nM |
| CHEMBL1529824 | CC(c1ccccc1)c2cc(C)c(C)c(CN3CCOCC3)c2O                                                                                         | 100000 | nM |
| CHEMBL1370669 | OC(=O)CCc1oc(cc1)c2ccc(Br)cc2                                                                                                  | 100000 | nM |
| CHEMBL1518296 | CCOc1ccc(Nc2nc3ccccc3n4nnnc24)cc1                                                                                              | 100000 | nM |
| CHEMBL1486598 | COC(=O)C1=C(C)NC(=O)/C/1=C\c2cccs2                                                                                             | 100000 | nM |
| CHEMBL1307104 | COc1ccccc1\C=C(\CC(=O)NCc2ccccc2)/c3nc4ccccc4s3                                                                                | 100000 | nM |
| CHEMBL1600987 | CCOc1ccc(cc1OCC)c2nnn(CC(=O)c3ccc4OCCOc4c3)n2                                                                                  | 100000 | nM |
| CHEMBL1300285 | CCc1ccc2nc(N3CCN(C)CC3)c(cc2c1)C#N                                                                                             | 100000 | nM |
| CHEMBL1383536 | CCOC(=O)c1cc(NC(=O)N2CCc3ccccc23)c(C)nc1C                                                                                      | 100000 | nM |
| CHEMBL1497978 | Cc1ccn2cc(CNS(=O)(=O)c3ccc(Cl)s3)nc2c1                                                                                         | 100000 | nM |

|               |                                                                                          |        |    |
|---------------|------------------------------------------------------------------------------------------|--------|----|
| CHEMBL1731995 | O=C(COC(=O)c1c2CC\C(=C\c3occc3)\c2nc4cccc14)NC5CCCC5                                     | 100000 | nM |
| CHEMBL1323320 | OC(=O)c1cccc(c1)n2cccc2\C=C/3\SC(=O)N(Cc4cccc4C#N)C3=O                                   | 100000 | nM |
| CHEMBL1604171 | CC(C)(C)NC(=O)\C(=C\c1occc1)\c2cccc2                                                     | 100000 | nM |
| CHEMBL1560978 | CCC(C)(C)n1nnnc1C(N2CCN(CC2)c3ccc(O)cc3)c4ccc5neccc5c4                                   | 100000 | nM |
| CHEMBL1517216 | O=C(N1CCN(CC1)S(=O)(=O)c2cccc2)c3cccc(c3)n4cccc4                                         | 100000 | nM |
| CHEMBL1492213 | COc1ccc(cc1)N2C3=C(CC4=C2CCCC4=O)C(=O)CCC3                                               | 100000 | nM |
| CHEMBL1706291 | OC(=O)c1cc(nn1c2ccc(F)cc2F)c3ccc(cc3)N4CCOCC4                                            | 100000 | nM |
| CHEMBL1454994 | COc1ccc(cc1)C2CC(=O)Oe3cc(OC)ccc23                                                       | 100000 | nM |
| CHEMBL1304345 | Cc1c(C)n(C(=O)CSc2nc3cccc3[nH]2)c4cccc14                                                 | 100000 | nM |
| CHEMBL1537344 | Cl.CN(C)[C@H]1[C@@H]2CC3C(=C(O)[C@]2(O)C(=C(C(=O)N)C1=O)O)C(=O)c4c(O)ccc(Cl)c4[C@@]3(C)O | 100000 | nM |
| CHEMBL1344700 | COC(=O)\C(=C(F)/SCC(=O)C)\C(F)(F)F                                                       | 100000 | nM |
| CHEMBL1328241 | O=C1C(Cc2cccc12)Sc3oc(nn3)c4ccccn4                                                       | 100000 | nM |
| CHEMBL1541295 | Cc1cccc(c1)N2C(=S)NC(=O)\C(=C/c3oc(CN(CCC#N)S(=O)(=O)C)cc3)\C2=O                         | 100000 | nM |
| CHEMBL1383388 | CN1C(=O)C(=C(C)CC1(C)C)C#N                                                               | 100000 | nM |
| CHEMBL1492858 | COc1cc2CCN(C3CC4(C=CC(=O)C=C4)c(c1OC)c23)C(=O)CCC(=O)O                                   | 100000 | nM |
| CHEMBL1548690 | CCOC(=O)C1=NN(C(=N)C(=C1C)C#N)c2ccc(Cl)cc2Cl                                             | 100000 | nM |
| CHEMBL1543104 | Cc1ccc(cc1)N2C(=O)[C@@H]3[C@H]4C=CC=NN4[C@@H]([C@@H]3C2=O)C(=O)Nc5ccc(Cl)cc5             | 100000 | nM |
| CHEMBL1884136 | CC(C)(C)OC(=O)N(Cc1cccc1)Cc2cccc(OCc3cccc(NC(=O)c4cccc4)c3)c2                            | 100000 | nM |
| CHEMBL1352461 | COCC(C)n1c(C)cc(C(=O)CSC2=Nc3sc(C)c(C)c3C(=O)N2CC=C)c1C                                  | 100000 | nM |
| CHEMBL1431126 | Oc1nc2cccc2n3c(nnc13)c4cccc4                                                             | 100000 | nM |
| CHEMBL1562255 | Cc1cccc(C)c1NC(=O)CCS(=O)(=O)c2cccc3nsnc23                                               | 100000 | nM |
| CHEMBL3210787 | COc1ccc(cc1)\N=C/2\S\C(=C/c3oc(C)cc3)\C(=O)N2CC(C)C                                      | 100000 | nM |
| CHEMBL1362225 | CNC(=O)[C@@H]1C[C@H]1[C@@H]1(NC(=O)OCc2cccc2)c3cccc3                                     | 100000 | nM |
| CHEMBL1985649 | CC1=CC(C)(C)N2C(=O)\C(=N\c3ccc(O)cc3)\c4cccc1c24                                         | 100000 | nM |
| CHEMBL1487668 | C(Nc1nc(cs1)c2ccnc2)c3occc3                                                              | 100000 | nM |
| CHEMBL1517511 | CC(=O)N\C=C/C=C/C=C/1\Sc2cccc2C1=O)c3cccc3                                               | 100000 | nM |
| CHEMBL1349645 | CC1CCCN(C1)C(=O)CN2CCN(CC2)C(=O)c3occc3                                                  | 100000 | nM |
| CHEMBL1495281 | C(CNc1ccc2nnc(c3cccc3)n2n1)CN4CCN(Cc5cccc5)CC4                                           | 100000 | nM |
| CHEMBL1473579 | CN(CC(=O)Nc1ccc(F)cc1)C(=O)c2cc(nc3cccc23)c4occc4                                        | 100000 | nM |
| CHEMBL1598620 | Cc1ccc(cc1n2cnnc2)S(=O)(=O)N(Cc3occc3)Cc4ccccn4                                          | 100000 | nM |
| CHEMBL3198411 | CCSC1=C(C#N)C(\C(=C/O)\OC)\C(=N1)C)c2cccs2                                               | 100000 | nM |
| CHEMBL3211848 | COc1ccc(cc1)C(=O)N\N=C\c2ccnc2                                                           | 100000 | nM |
| CHEMBL1318116 | CCCCN1C(=O)NC(=O)C(=C1N)N(CCOC)C(=O)c2cc(nc3cccc23)c4occc4                               | 100000 | nM |
| CHEMBL1435484 | O=C(Nc1nc(c2occc2)c(s1)c3occc3)c4occc4                                                   | 100000 | nM |
| CHEMBL1393731 | CCOc1ccc2nc(O)c(CN(Cc3occc3)C(=O)c4ccc(Br)cc4)cc2c1                                      | 100000 | nM |
| CHEMBL1368322 | Nc1ccc(cc1)C(=C2C=CC(=N)C=C2)c3ccc(N)cc3                                                 | 100000 | nM |
| CHEMBL1363924 | CCn1c(SCC(=O)Nc2cc(C)on2)nnc1c3ccnc3                                                     | 100000 | nM |
| CHEMBL1352809 | CCOc1ccc(cc1)n2c(Cc3cc(O)nc(O)n3)nnc2SCC(=O)NC4CCCC4                                     | 100000 | nM |
| CHEMBL1498201 | NC(=O)c1ccc(N2CCN(CC2)c3ccc(O)cc3)c(c1)[N+](=O)[O-]                                      | 100000 | nM |
| CHEMBL1323006 | Cc1onc(C)c1COc2ccc(cc2)C(=O)OCC(=O)N3c4cccc4NC(=O)C3(C)C                                 | 100000 | nM |
| CHEMBL1325311 | COc1ccc2cc(C3C(=C(N)OC(=C3C(=O)C)C)C#N)c(Cl)nc2c1                                        | 100000 | nM |
| CHEMBL1598069 | COc1ccc2nc(O)c(CN(Cc3occc3)C(C(C)C)c4nncn4Cc5cccc5)cc2c1                                 | 100000 | nM |
| CHEMBL1585469 | CCCCN1C(=O)NC(=O)C2(Cc3cccc3N4CCOCC24)C1=O                                               | 100000 | nM |
| CHEMBL1428889 | CCc1nc(OCc2occc2)c3sc4nc5CC(C)(C)OCc5cc4c3n1                                             | 100000 | nM |
| CHEMBL1574497 | CC1Cc2cccc2N1C(=O)C3CCN(CC3)S(=O)(=O)c4c(C)noc4\C=C\c5occc5                              | 100000 | nM |
| CHEMBL1419169 | COc1cccc(C(C#N)N2CCCC2)c1O                                                               | 100000 | nM |



|               |                                                                                                        |        |    |
|---------------|--------------------------------------------------------------------------------------------------------|--------|----|
| CHEMBL1556882 | CC1(C)Cc2nc3sc4c(SCC(=O)NCc5occc5)ncnc4c3cc2CO1                                                        | 100000 | nM |
| CHEMBL3193682 | O=C(N\N=C\c1ccc[nH]1)c2ccnc2                                                                           | 100000 | nM |
| CHEMBL1388553 | O.Cl.Nc1ccc(cc1)N2CCN(CCCCN3C(=O)C4CCCN4C3=O)CC2                                                       | 100000 | nM |
| CHEMBL1375390 | CN1C(=O)N(C)C(=O)C2(Cc3cc4cc(C)ccc4nc3N5CCCCC25)C1=O                                                   | 100000 | nM |
| CHEMBL1311134 | CCOC(=O)N1CCC(CC1)NC(=O)c2ccc(OC)c(CN3CC(=O)N4CCCC4C3=O)c2                                             | 100000 | nM |
| CHEMBL1200567 | O.Cl.CCO.C[C@@H]1[C@H]2[C@H](O)[C@H]3[C@H](N(C)C)C(=C(C(=O)N)C(=O)[C@@]3(O)C(=C2C(=O)c4c(O)cccc14)O)O  | 100000 | nM |
| CHEMBL1351621 | CN1N(C(=O)C(=C1C)NC(=O)CN2CCN(CC2)c3ccc(O)cc3)c4cccc4                                                  | 100000 | nM |
| CHEMBL1419335 | COc1ccc(OC)c(Nc2nc(cs2)c3ccc(O)c(O)c3)c1                                                               | 100000 | nM |
| CHEMBL1392444 | O=C(NC(=S)N1CCCc2ccccc12)c3ccccc3                                                                      | 100000 | nM |
| CHEMBL1533621 | O=C1C=C(Nc2cccc3ccnc23)c4cccc4C1=O                                                                     | 100000 | nM |
| CHEMBL1502275 | COc1ccc(cc1)n2c(Cc3cccn3C)nnc2SCC(=O)N                                                                 | 100000 | nM |
| CHEMBL1462570 | Cc1cc(O)c(Oc2cc(C)cc(O)c2O)c(O)c1                                                                      | 100000 | nM |
| CHEMBL1310730 | COc1ccc(NS(=O)(=O)c2ccc(c2)C(=O)NNC(=O)c3cccn3C)cc1                                                    | 100000 | nM |
| CHEMBL1587966 | OP(=O)(CN1CCCCC1)CN2CCCCC2                                                                             | 100000 | nM |
| CHEMBL1416437 | Cc1cc(c(C)n1C)c2csc(NC(=O)c3oc4ccccc4c3)n2                                                             | 100000 | nM |
| CHEMBL1871358 | C[C@@H](CO)N1C[C@@H](C)[C@H](CN(C)C(=O)Nc2ccc(cc2)C(F)(F)F)OCCCC[C@H](C)Oe3ccc(NC(=O)Nc4ccccc4)cc3C1=O | 100000 | nM |
| CHEMBL1519669 | CC(=O)c1cccc(NC(=O)CN2C(=O)NC3(CCCCCC3)C2=O)c1                                                         | 100000 | nM |
| CHEMBL1503314 | COc1ccc(CCNC(=O)CN2CCc3ccccc23)cc1OC                                                                   | 100000 | nM |
| CHEMBL1337299 | NC(=O)c1c2CCc2sc1NC(=O)Cc3cccs3                                                                        | 100000 | nM |
| CHEMBL1549834 | O=C(N1CCN(CC1)C(c2cccn2)c3nnnn3C4CCCC4)c5occc5                                                         | 100000 | nM |
| CHEMBL1369848 | O=C(NCCN1CCN(CC1)c2ccccc2)C3CCN(CC3)S(=O)(=O)c4ccccc5nonc45                                            | 100000 | nM |
| CHEMBL1350464 | CCc1ccccc1N(CC(=O)NCCSCc2occc2)S(=O)(=O)C                                                              | 100000 | nM |
| CHEMBL1720147 | Cl.CN1CCc2nc3ccc(Cl)cc3c(c2C1)c4ccccc4C1                                                               | 100000 | nM |
| CHEMBL1324188 | CN(C1CCCC1)C2=NN3C(=Nc4ccccc4C3=O)C=C2                                                                 | 100000 | nM |
| CHEMBL1318963 | Cc1cc(C(=O)CSc2nnc(c3ccccc3)n2Cc4ccc5OCOc5c4)c(C)n1C                                                   | 100000 | nM |
| CHEMBL1593348 | Cc1oc(C)c(c1)C(=O)NNC(=O)\C=C\c2occc2                                                                  | 100000 | nM |
| CHEMBL1594813 | COC(=O)C(C)Sc1nnc(Cc2cc(O)nc(O)n2)n1c3cc(C)ccc3C                                                       | 100000 | nM |
| CHEMBL1570840 | OC1=CC(=O)NC(=S)N1c2ccc(F)cc2                                                                          | 100000 | nM |
| CHEMBL1562157 | Cc1cc(O)cc(O)c1C(=O)Cc2cnn(c2)c3ccccc3                                                                 | 100000 | nM |
| CHEMBL1409063 | OC(=O)C(Cc1c[nH]c2ccccc12)NC(=O)c3ccccc3NC(=O)c4occc4                                                  | 100000 | nM |
| CHEMBL1555494 | CCc1c(CNc2ccccc2O)nc3ccccc13                                                                           | 100000 | nM |
| CHEMBL1404083 | O=C1NC(=O)C(=CN2CCc3ccccc23)C(=O)N1                                                                    | 100000 | nM |
| CHEMBL1442147 | CC\C(C=O)N(C(=O)N(CC=C)C1=O)\NCCN2CCOCC2                                                               | 100000 | nM |
| CHEMBL1557913 | COc1ccccc1C2=Nc3ccccc4cccc(N2)c34                                                                      | 100000 | nM |
| CHEMBL1490479 | COc1ccc(NC(=NNc2ccc(cc2)[N+](=O)[O-])P(=O)(N3CCOCC3)N4CCOCC4)cc1                                       | 100000 | nM |
| CHEMBL1979957 | COCC\N=C\1/SC=C(N1\N=C\c2ccc(O)c(O)c2O)c3cccs3                                                         | 100000 | nM |
| CHEMBL1312190 | Oc1ccc(cc1O)C(=O)CN2CCN(CC2)S(=O)(=O)c3ccc(F)cc3                                                       | 100000 | nM |
| CHEMBL1446088 | CCN(CC(=O)Nc1c(F)cccc1F)C(=O)c2cccc(c2)n3ccccc3                                                        | 100000 | nM |
| CHEMBL1422946 | CCc1ccc(CC)c(c1)S(=O)(=O)Nc2ccc(C(=O)O)c(O)c2                                                          | 100000 | nM |
| CHEMBL1364567 | CN(CC(=O)Nc1c(Cl)cccc1Cl)C(=O)c2cccc(c2)n3ccccc3                                                       | 100000 | nM |
| CHEMBL1458390 | COc1ccc(cc1OC)c2ccc(C#N)c(SCC(=O)Nc3sc4CCc4c3C#N)n2                                                    | 100000 | nM |
| CHEMBL1450538 | Cc1occc1c2nnc(SCC(=O)N3CCN(CC3)c4ccccc4)n2C                                                            | 100000 | nM |
| CHEMBL3193326 | COc1ccc(\C=N/NC(=O)c2cc(O)c(O)c(O)c2)cc1CN3CCN(CC3)c4ccc(F)cc4                                         | 100000 | nM |
| CHEMBL1548347 | CN1CCN(CC1)C(=O)CSc2nc(ccc2C#N)c3cccs3                                                                 | 100000 | nM |
| CHEMBL1533464 | OC(=O)c1ccc(cc1)n2nc(c3CCc4occc4c23)C(F)(F)F                                                           | 100000 | nM |
| CHEMBL1608918 | O=C(NC1CCCC1)C(N(Cc2ccccc2)C(=O)c3csnn3)c4occc4                                                        | 100000 | nM |

|               |                                                                           |        |    |
|---------------|---------------------------------------------------------------------------|--------|----|
| CHEMBL1313583 | NC1=CC=CC2=[N+](O-)C3(CCCCC3)N=C12                                        | 100000 | nM |
| CHEMBL1299528 | CCOc1ccc(cc1)n2c(Cc3cc(O)nc(O)n3)nnc2SCC(=O)N                             | 100000 | nM |
| CHEMBL1432345 | CC(=O)N1CCN(CC1)c2ccc(NCc3ccc(F)cc3)cc2                                   | 100000 | nM |
| CHEMBL1425459 | CC(C)CN(C1CCS(=O)(=O)C1)C(=O)COC(=O)c2cc(C)n(c2C)c3ccc(C)cc3              | 100000 | nM |
| CHEMBL1416702 | Cc1cc(C)cc(NCc2cc3OCOc3cc2[N+](=O)[O-])c1                                 | 100000 | nM |
| CHEMBL2003964 | C\N=C\1/SC=C(N1\N=C\c2ccc(O)c(O)c2)c3occc3                                | 100000 | nM |
| CHEMBL1346640 | CCOc1cccc(CNc2ccc(O)cc2)c1OCc3ccc(Cl)cc3Cl                                | 100000 | nM |
| CHEMBL1333695 | CCC(=O)Nc1cc(C)c(NC(=O)C23CC4CC(CC(C4)C2)C3)cn1                           | 100000 | nM |
| CHEMBL1480652 | COCCNC(=O)C1=CC=CN2C(=O)c3cc4cccc4cc3N=C12                                | 100000 | nM |
| CHEMBL1301692 | Clc1cccc(c1)n2nc(cc2C(=O)N3CCCC3)c4occc4                                  | 100000 | nM |
| CHEMBL1306765 | COCCNC(=O)c1oc(CS(=O)(=O)c2c(Cl)cccc2Cl)cc1                               | 100000 | nM |
| CHEMBL1451078 | Oc1ccc(CC2NC3([C@H]4[C@@H]2C(=O)N(C4=O)c5ccc(F)cc5)C(=O)Nc6ccc(F)cc36)cc1 | 100000 | nM |
| CHEMBL1535798 | CC(C)(Oc1ccc(Cl)cc1)C(=O)NCc2occc2                                        | 100000 | nM |
| CHEMBL1364286 | Cc1ccc(cc1)N2CCN(C2c3ccccn3)c4ccc(C)cc4                                   | 100000 | nM |
| CHEMBL1463665 | CC(=O)C1=C(O)C(=O)N(Cc2occc2)C1c3ccc(F)cc3                                | 100000 | nM |
| CHEMBL1612609 | COc1ccc(cc1)C2=NC3=C(C(=O)N2Cc4occc4)C(=O)c5ccc(OC)cc5O3                  | 100000 | nM |
| CHEMBL1531315 | CSc1oc(nc1S(=O)(=O)c2cccc2)c3occc3                                        | 100000 | nM |
| CHEMBL1863612 | CCN1CCN(CC1)C(=O)CN(C)S(=O)(=O)c2ccc(OC)c(C)c2                            | 100000 | nM |
| CHEMBL1735497 | COCOC1CCC2C3CCC4=CC(=O)CCC4=C3C=CC12C                                     | 100000 | nM |
| CHEMBL1608044 | Nc1ccc(Oc2ncccn2)cc1                                                      | 100000 | nM |
| CHEMBL1585044 | COc1cccc1NC(=O)CN(Cc2occc2)C(=O)c3cccs3                                   | 100000 | nM |
| CHEMBL3195986 | CC(C)Nc1nnc(SC\C=C(\C#N)/C(=N)C)\O)s1                                     | 100000 | nM |
| CHEMBL1542333 | S=C(Nc1ccc2OCCOc2c1)Nc3ccc4OCOc4c3                                        | 100000 | nM |
| CHEMBL1372650 | Clc1ccc(cc1)C(=O)CSc2nc(ccc2C#N)c3occc3                                   | 100000 | nM |
| CHEMBL1463037 | CC(C)CN(C(=O)CN1CCN(CC1)c2ccc(O)cc2)C3=C(N)N(CC(C)C)C(=O)NC3=O            | 100000 | nM |
| CHEMBL1423709 | Cn1cccc1\C=C/2\C(=O)NC(=S)N(Cc3ccc(F)cc3)C2=O                             | 100000 | nM |
| CHEMBL1408125 | [O-][N+](=O)c1cc(Br)c(c(Br)c1)c2oc(\C=C/3\NC(=S)NC3=O)cc2                 | 100000 | nM |
| CHEMBL1545501 | COc1ccc(OC)c(N\C=C\C(=O)c2oc(C)cc2)\C)c1                                  | 100000 | nM |
| CHEMBL1400510 | CC1=Nc2cccc3cccc(N1)c23                                                   | 100000 | nM |
| CHEMBL1381306 | COc1ccc2c(c1)C(=O)Oc3cc(OCC(=O)N4CCC(C)CC4)ccc23                          | 100000 | nM |
| CHEMBL1373289 | [O-][N+](=O)c1oc(\C=C/2/C=C(OC2=O)c3ccc(F)cc3)cc1                         | 100000 | nM |
| CHEMBL1612931 | COCCNc1nnc(SC(C)C(=O)Nc2ccc(cc2)c3nc4ccc(C)cc4s3)s1                       | 100000 | nM |
| CHEMBL1301260 | CC(C)C[C@H](NC(=O)c1[nH]cnc1C(=O)N2CCN(CC2)c3cccc3)C(=O)OC(C)C            | 100000 | nM |
| CHEMBL1423492 | Cc1cc(Cl)cc2c1NC(=O)[C@]23[C@H]4[C@@H]([C@@H]5CCCN35)C(=O)N(Cc6cccc6)C4=O | 100000 | nM |
| CHEMBL1534745 | CCOC(=O)\C=C\1/SCC(=O)N1CC(=O)NC(C)c2ccc(F)cc2                            | 100000 | nM |
| CHEMBL1338730 | CCOC(=O)C1=C(COC(=O)\C=C\c2occc2)NC(=O)NC1C                               | 100000 | nM |
| CHEMBL1486316 | CC(=O)Nc1ccc(NC(=O)CSc2enn(c3cccc3)c2n4cccc4)cc1                          | 100000 | nM |
| CHEMBL1325883 | COc1ccc(NC(=O)CCCS2cccc2)cc1                                              | 100000 | nM |
| CHEMBL1452930 | COc1ccc(cc1)S(=O)(=O)Cc2oc(cc2)C(=O)N3CCN(CC3)c4cccc4                     | 100000 | nM |
| CHEMBL1439414 | Clc1cccc(c1)N2C(=O)NC(=O)\C=C\c3oc(Sc4nc5cccc5[nH]4)cc3)\C2=O             | 100000 | nM |
| CHEMBL82134   | [I-].CCN1\C=C\C=C\C=C\C=C\c2sc3cccc3[n+]2CC)\Sc4cccc14                    | 100000 | nM |
| CHEMBL1345135 | Cc1oc(cc1)c2cc(C(=O)Nc3ccc(C)cn3)c4cccc4n2                                | 100000 | nM |
| CHEMBL1703976 | Oc1c(ccc2cccc12)C3(OC(=O)c4cccc34)c5ccc6cccc6c5O                          | 100000 | nM |
| CHEMBL1412418 | COc1cc(\C=C/CC(=O)O)c2nc3cccc3s2)cc(OC)c1O                                | 100000 | nM |
| CHEMBL1370087 | Cc1cc(C(=O)CN2C(=O)c3cccc3S2(=O)=O)c(C)n1CC4CCCO4                         | 100000 | nM |
| CHEMBL1707215 | [O-][N+](=O)c1ccc(c(c1)[N+](=O)[O-                                        | 100000 | nM |

|               |                                                                                                                                                                            |        |    |
|---------------|----------------------------------------------------------------------------------------------------------------------------------------------------------------------------|--------|----|
| CHEMBL1447076 | )]S(=O)(=O)Nc2ccccc2C(=O)N3O[C@H]4C[C@@H]3C=C4<br>NS(=O)(=O)c1ccc(cc1)N2N=C(CC2c3ccc(F)cc3)c4ccc(Br)cc4<br>Cc1cc(C)c(c(C)c1)S(=O)(=O)NCC2CCC(CC2)C(=O)N3CCC4(CC3)O<br>CCO4 | 100000 | nM |
| CHEMBL1408354 | Cc1ccc(cc1)N2CSC3=C(C#N)C(CC(=O)N3C2)c4cccs4                                                                                                                               | 100000 | nM |
| CHEMBL1549607 | Cl.CC(=O)N1CCN(CC1)c2ccc(NCc3ccc(C)s3)cc2                                                                                                                                  | 100000 | nM |
| CHEMBL1528749 | COc1ccc(NC(=O)CN(C)C(=O)c2cccc(c2)n3cccc3)cc1                                                                                                                              | 100000 | nM |
| CHEMBL1473982 | COc1ccc(CCNC(=O)\C=C\c2occc2)cc1                                                                                                                                           | 100000 | nM |
| CHEMBL1539953 | CC(C)CCN1CCN(Cc2cccn2c3cccn3)CC1CCO                                                                                                                                        | 100000 | nM |
| CHEMBL1887584 | COc1cc(NCCCNC(C)C)c2nccc(C)c2c1                                                                                                                                            | 100000 | nM |
| CHEMBL1874279 | CC1=C(O)C(=O)C=C2C1=CC=C3C2(C)CCC4(C)C5CC(C)(CCC5(C)C<br>CC34C)C(=O)O                                                                                                      | 100000 | nM |
| CHEMBL1712082 | FC(F)(F)C1CC(Nc2cc(nn12)C(=O)N3CCc4ccccc4C3)c5occc5                                                                                                                        | 100000 | nM |
| CHEMBL1602613 | O=C(CSc1nnc(C2CCCC2)n1Cc3ccccc3)NCc4occc4                                                                                                                                  | 100000 | nM |
| CHEMBL1576463 | CC(C)CC(NC(=O)\C=C\c1occc1)\NC(=O)c2oc(Br)cc2)C(=O)O                                                                                                                       | 100000 | nM |
| CHEMBL1414980 | CC(C)c1ccc(cc1)N2C(=O)Cc3c2nc4N=C(C)Nc5nc(N6CCCC6)c(C#N<br>)c3c45.CN(C)C=O                                                                                                 | 100000 | nM |
| CHEMBL1392313 | CNCc1ccccc1Sc2ccc(O)c(O)c2.OC(=O)\C=C/C(=O)O                                                                                                                               | 100000 | nM |
| CHEMBL1536196 | CN(CC(=O)Nc1cc(C)ccc1C)C(=O)c2cccc(c2)n3cccc3                                                                                                                              | 100000 | nM |
| CHEMBL1512376 | CCCCn1enc2cc(NCc3ccncc3)ccc12                                                                                                                                              | 100000 | nM |
| CHEMBL1347904 | COc1cc(ccc1C=C2c3ccccc3n4c2cc(c5ccccc5)[n+]4C)N(C)C.[O-<br>]S(=O)(=O)C(F)(F)F                                                                                              | 100000 | nM |
| CHEMBL1727678 | COc1ccc(OC)c(c1)C2C(=C(C)Nc3nc(CCCO)nn23)C(=O)Nc4ccc(F)cc4                                                                                                                 | 100000 | nM |
| CHEMBL1597571 | CC1OC(OCC2OC(OC3=C(Oc4cc(O)cc(O)c4C3=O)c5ccc(O)cc5)C(O)<br>C(O)C2O)C(O)C(O)C1O                                                                                             | 100000 | nM |
| CHEMBL1419228 | NC(=O)\C=C\1/C=CC2=NC34CCCCC3CC5=C(CCCC5)N4C2=C1)\C<br>#N                                                                                                                  | 100000 | nM |
| CHEMBL3184468 | CN1C(=O)\C(=N/C(=O)C)\c2c3ccccc3c(O)c4cccc1c24                                                                                                                             | 100000 | nM |
| CHEMBL1997370 | COc1ccccc1CNC(=O)COC(=O)c2cc(nc3ccccc23)c4occc4                                                                                                                            | 100000 | nM |
| CHEMBL1361703 | [O-][N+](=O)c1cc2no[n+](O)c2cc1N3CCCC3                                                                                                                                     | 100000 | nM |
| CHEMBL1736432 | CCn1c(SCC(=O)NCc2occc2)nnc1c3cccs3                                                                                                                                         | 100000 | nM |
| CHEMBL1350960 | FC(F)(F)c1cc(nc(NCc2ccnc2)n1)c3occc3                                                                                                                                       | 100000 | nM |
| CHEMBL1333071 | CCC(N(Cc1ccccc1OC)Cc2cc3cc(C)ccc3nc2O)c4nnnn4Cc5occc5                                                                                                                      | 100000 | nM |
| CHEMBL1328884 | CCCOc(=O)Nc1sc2CCCc2c1C(=O)OCC                                                                                                                                             | 100000 | nM |
| CHEMBL1303512 |                                                                                                                                                                            |        |    |
